# Supplementary material for: Functional identification of protocadherin alpha 9 (PCDHA9) as a candidate causative gene for amyotrophic lateral sclerosis
Source: Research Square preprint supplement (doi:10.21203/rs.3.rs-2952148/v1), 2023-06-22
Supplement: Supplementary file 6 [file Table S10.xls]

## Sheet: DEGs in snRNA-seq
p_val	avg_log2FC	pct.1	pct.2	p_val_adj	gene
4.5902+2:1108701684003E-33	0.584466	0.687	0.628	1.07743e-28	Trpm3
6.50263e-22	0.445475	0.32	0.237	1.5263e-17	Arhgap6
7.74122e-22	0.421551	0.776	0.746	1.81702e-17	Kirrel3
1.74444e-130	0.39197	0.445	0.203	4.09455e-126	Fggy
8.46154e-27	0.374782	0.194	0.112	1.98609e-22	Ebf2
5.68942e-49	0.337617	0.688	0.56	1.33542e-44	Nyap2
3.4625e-40	0.301088	0.969	0.959	8.12718e-36	Grm7
8.60654e-29	0.293678	0.556	0.449	2.02013e-24	Plppr1
2.95485e-12	0.293115	0.961	0.95	6.93562e-08	Kcnip4
5.03244e-44	0.288338	0.996	0.997	1.18122e-39	Dpp6
9.12552e-47	0.266764	0.997	0.995	2.14194e-42	Rbfox1
3.66067e-55	0.230648	1	1	8.59234e-51	Lsamp
1.20191e-28	0.228296	0.147	0.073	2.82113e-24	Kcnh8
2.09672e-15	0.226586	0.561	0.484	4.92141e-11	Ldb2
9.70133e-13	0.226155	0.67	0.658	2.2771e-08	Ptprt
4.58579e-31	0.223647	0.979	0.976	1.07638e-26	Syt1
2.16964e-15	0.2161	0.848	0.885	5.09257e-11	Cttnbp2
3.06139e-51	0.214983	0.999	1	7.18571e-47	Dlg2
6.97317e-09	0.211856	0.748	0.763	0.000163674	Cdh8
6.40282e-38	0.204241	0.99	0.992	1.50287e-33	Kcnma1
1.70579e-15	0.203632	0.909	0.909	4.00384e-11	Kcnq3
0.00179346	0.201529	0.194	0.17	1	Cpne4
0.0726753	0.200097	0.553	0.632	1	Tafa1
1.92628e-19	-0.20306	0.555	0.663	4.52136e-15	Hsp90ab1
5.59613e-43	-0.204041	0.509	0.69	1.31352e-38	Fgf1
1.60799e-27	-0.205923	0.758	0.882	3.77427e-23	Scn9a
8.07763e-60	-0.213676	0.107	0.243	1.89598e-55	Plekhg1
5.38489e-26	-0.218841	0.688	0.784	1.26394e-21	Nfia
1.27808e-13	-0.221109	0.275	0.352	2.99992e-09	Apod
1.14326e-31	-0.221902	0.961	0.978	2.68346e-27	Ctnna3
7.82379e-20	-0.223754	0.354	0.458	1.8364e-15	Ugt8a
3.88748e-25	-0.226748	0.762	0.863	9.12469e-21	Slit2
1.40434e-29	-0.227753	0.773	0.893	3.29627e-25	Elavl2
5.01484e-90	-0.230739	0.073	0.229	1.17708e-85	Cdh19
6.41022e-11	-0.245774	0.289	0.333	1.50461e-06	Sox2ot
2.88403e-15	-0.26696	0.611	0.69	6.7694e-11	Hsp90aa1
2.76239e-34	-0.283695	0.491	0.629	6.48387e-30	Hspa8
2.33841e-07	-0.296699	0.373	0.395	0.00548872	St18
4.89855e-53	-0.309373	0.556	0.735	1.14979e-48	Nefm
5.186e-222	-0.34946	0.01	0.229	1.21726e-217	Catspere1
3.91262e-212	-0.528522	1	1	9.1837e-208	Gphn
1.07489e-37	0.31566	0.97	0.965	2.52299e-33	Grm5
4.48986e-29	0.224075	0.948	0.944	1.05386e-24	Robo2
2.17503e-34	-0.200157	0.627	0.79	5.10523e-30	Cep83
4.54232e-21	-0.20605	0.212	0.304	1.06617e-16	Mal
2.93325e-51	-0.211196	0.991	0.997	6.88493e-47	Ube3a
0.00137497	-0.248654	0.554	0.587	1	Fth1
2.50677e-65	-0.213278	0.104	0.245	5.88388e-61	Daam2
7.93292e-17	-0.215417	0.355	0.44	1.86201e-12	Actb
7.9569e-18	0.618306	0.635	0.639	1.86764e-13	Ebf1
1.44055e-177	0.481332	0.986	0.978	3.38125e-173	Prkn
0.00197846	0.424397	0.951	0.958	1	Dpp10
2.82557e-13	0.403735	0.77	0.776	6.63218e-09	Hdac9
1.71263e-38	0.386906	0.282	0.168	4.01988e-34	Ankfn1
9.68615e-33	0.381405	0.481	0.369	2.27353e-28	A330008L17Rik
3.56375e-27	0.35808	0.852	0.84	8.36483e-23	Prkg1
4.4246e-42	0.354184	0.933	0.948	1.03854e-37	Celf2
2.74143e-19	0.330476	0.716	0.709	6.43469e-15	Arpp21
1.51331e-07	0.330125	0.587	0.597	0.00355204	Cacna2d1
2.74563e-48	0.31525	0.983	0.978	6.44455e-44	Asic2
6.7632e-44	0.314618	0.979	0.976	1.58746e-39	Negr1
5.18254e-25	0.313164	0.746	0.721	1.21645e-20	Cacna1e
1.26664e-26	0.300592	0.921	0.912	2.97305e-22	Auts2
7.8086e-19	0.295776	0.336	0.261	1.83283e-14	Pdzd2
1.11088e-27	0.29149	0.411	0.307	2.60745e-23	Ebf3
2.90344e-43	0.271461	0.998	1	6.81496e-39	Csmd1
3.34451e-16	0.265112	0.792	0.807	7.85022e-12	Tshz2
1.66702e-42	0.265089	0.986	0.985	3.91284e-38	Dlgap1
2.37823e-28	0.260457	0.362	0.261	5.58218e-24	Nrp1
1.31826e-60	0.256297	0.986	0.987	3.09423e-56	Cacna1a
1.05697e-11	0.25277	0.694	0.694	2.48092e-07	Gabrg3
3.88762e-25	0.250255	0.969	0.968	9.12503e-21	Kcnd2
4.3622e-17	0.250134	0.548	0.484	1.0239e-12	Chgb
1.1011e-34	0.248692	0.332	0.218	2.58451e-30	Camk2a
7.51134e-13	0.244222	0.246	0.187	1.76306e-08	Cpne8
2.01828e-43	0.242432	0.626	0.502	4.7373e-39	Slc25a3
5.01775e-11	0.241444	0.721	0.742	1.17777e-06	Kcnip1
3.55938e-49	0.240137	0.433	0.294	8.35459e-45	A930015D03Rik
1.48742e-21	0.237285	0.986	0.99	3.49127e-17	Rora
3.33298e-08	0.23701	0.329	0.283	0.000782318	Pcsk5
5.71859e-34	0.231136	0.429	0.316	1.34227e-29	Ptgds
2.35545e-05	0.230069	0.468	0.47	0.552871	Tmcc3
1.91238e-14	0.227444	0.74	0.743	4.48874e-10	Gria1
3.53464e-08	0.221051	0.65	0.641	0.000829651	Sema6d
3.42585e-19	0.215639	0.402	0.323	8.04115e-15	Ly6h
7.4133e-13	0.207856	0.784	0.819	1.74005e-08	Pcsk2
2.66342e-45	-0.200002	0.128	0.25	6.25158e-41	Bcas1
2.0596e-19	-0.202607	0.327	0.424	4.83429e-15	mt-Co1
4.40764e-44	-0.221289	0.655	0.828	1.03456e-39	P2ry14
3.04612e-36	-0.221326	0.237	0.351	7.14986e-32	Gm17171
2.69675e-29	-0.222333	0.304	0.407	6.32981e-25	Trim43c
8.75016e-55	-0.224227	0.609	0.804	2.05384e-50	Gm20275
1.23915e-20	-0.226806	0.461	0.538	2.90853e-16	B230217J21Rik
2.43256e-39	-0.227519	0.756	0.884	5.7097e-35	Bc1
5.52134e-80	-0.231834	0.094	0.245	1.29597e-75	Mlycd
2.32183e-21	-0.232246	0.391	0.477	5.4498e-17	Gm45321
4.20689e-90	-0.242189	0.04	0.17	9.87442e-86	Gm12160
2.3629e-45	-0.249012	0.534	0.714	5.54619e-41	Fhit
4.36609e-09	-0.259204	0.635	0.682	0.000102481	Scd2
4.67742e-07	-0.259649	0.283	0.309	0.0109788	Prr5l
5.7151e-46	-0.264825	0.404	0.569	1.34145e-41	Gm19951
2.68108e-50	-0.266824	0.777	0.919	6.29302e-46	Btbd9
4.12696e-27	-0.269326	0.231	0.336	9.6868e-23	Car2
1.25499e-38	-0.269337	0.603	0.759	2.94572e-34	Gm15398
1.90676e-67	-0.286619	0.568	0.79	4.47556e-63	9630014M24Rik
1.21285e-59	-0.298561	0.154	0.3	2.8468e-55	Glul
4.40832e-158	-0.311958	1	1	1.03472e-153	Malat1
2.8317e-33	-0.321662	0.8	0.85	6.64656e-29	Plcl1
3.57872e-51	-0.32527	0.491	0.664	8.39998e-47	4930555F03Rik
4.28168e-06	-0.396303	0.71	0.712	0.1005	Qk
1.52917e-11	-0.412834	0.408	0.445	3.58927e-07	Trf
9.22156e-117	-0.480758	0.993	0.999	2.16449e-112	Camk1d
6.56012e-254	-0.610558	0.483	0.826	1.53979e-249	Catspere2
0.0200013	-0.69952	0.823	0.79	1	Plp1
4.04792e-157	-0.718378	0.989	0.998	9.50128e-153	Cdk8
1.7782e-149	-0.816779	0.87	0.964	4.1738e-145	AY036118
4.87696e-216	-0.829622	0.978	0.996	1.14472e-211	Lars2
5.74467e-216	-0.883113	0.999	1	1.34839e-211	Cmss1
2.35606e-133	-0.938188	1	1	5.53014e-129	Gm42418

## Sheet: gene function of DEGs
disorder	ion transport	cell death	synapse	development	adhension
Fggy	Trpm3	Arhgap6	Kirrel3	Ebf2	Plppr1
Dpp6	Kcnip4	Tafa1	Rbfox1	Nyap2	Lsamp
Syt1	Kcnh8	Elavl2	Ptprt	Grm7	Cdh8
Fgf1	Kcnma1	Hdac9	Cttnbp2	Ldb2	Ctnna3
Plekhg1	Kcnq3		Dlg2	Hsp90ab1	Slit2
Nfia	Cpne4		Hsp90aa1	Robo2	Cdh19
Apod	Scn9a		Gphn	Cep83	St18
Ugt8a	Catspere1		Ube3a	Ebf1	Negr1
Malat1	Dpp10		Pdzd2	Prkg1	Glul
Sox2ot	Cacna2d1		Dlgap1	Auts2
Hspa8	Asic2		Camk2a	Nrp1
Nefm	Cacna1e		Gria1	Pcsk5
Grm5	Cacna1a		Bcas1	Sema6d
Mal	Gabrg3		Bc1	Pcsk2
Fth1	Kcnd2			Qk
Actb	Chgb
Prkn	Slc25a3
Arpp21	Kcnip1
Ebf3	mt-Co1
Cpne8	Trf
Rora	Camk1d
Ly6h	Catspere2
