# Supplementary material for: Functional identification of protocadherin alpha 9 (PCDHA9) as a candidate causative gene for amyotrophic lateral sclerosis
Source: Research Square preprint supplement (doi:10.21203/rs.3.rs-2952148/v1), 2023-06-22
Supplement: Supplementary file 11 [file Table S14.xlsx]

## Sheet: WT.means
id_cp_interaction	interacting_pair	partner_a	partner_b	gene_a	gene_b	secreted	receptor_a	receptor_b	annotation_strategy	is_integrin	OL.OL	OL.N	OL.A	OL.M	OL.OP	N.OL	N.N	N.A	N.M	N.OP	A.OL	A.N	A.A	A.M	A.OP	M.OL	M.N	M.A	M.M	M.OP	OP.OL	OP.N	OP.A	OP.M	OP.OP
CPI-SS0A7B487D4	KLRG2_WNT11	simple:A4D1S0	simple:O96014	KLRG2	WNT11	TRUE	TRUE	FALSE	InnateDB-All	FALSE	0	0.007	0	0	0	0	0.016	0	0	0	0	0.012	0	0	0	0	0.008	0	0	0	0	0	0	0	0
CPI-SS0FEC87269	KLRG2_TNFSF9	simple:A4D1S0	simple:P41273	KLRG2	TNFSF9	TRUE	TRUE	FALSE	InnateDB-All	FALSE	0.002	0.002	0	0.002	0.011	0.011	0.011	0	0.011	0.02	0.007	0.007	0	0.007	0.016	0.004	0.003	0	0.004	0.012	0	0	0	0	0
CPI-SS00A8596B5	PVR_TNFSF9	simple:P15151	simple:P41273	PVR	TNFSF9	TRUE	TRUE	FALSE	InnateDB-All	FALSE	0.015	0.015	0	0.015	0.024	0.042	0.042	0	0.042	0.051	0.014	0.014	0	0.014	0.023	0.024	0.024	0	0.024	0.033	0.035	0.035	0	0.035	0.044
CPI-SS044DF8749	KLRG2_WNT5B	simple:A4D1S0	simple:Q9H1J7	KLRG2	WNT5B	TRUE	TRUE	FALSE	InnateDB-All	FALSE	0.028	0.163	0.032	0.013	0.023	0.036	0.172	0.041	0.021	0.032	0.032	0.168	0.037	0.017	0.028	0.029	0.164	0.034	0.014	0.025	0	0	0	0	0
CPI-SS0F8ABC300	GALR2_GAL	simple:O43603	simple:P22466	GALR2	GAL	TRUE	TRUE	FALSE	guidetopharmacology.org	FALSE	0.004	0.031	0.003	0.002	0.005	0.006	0.033	0.005	0.004	0.007	0	0	0	0	0	0	0	0	0	0	0	0	0	0	0
CPI-SS0E70DD97F	GALR3_GAL	simple:O60755	simple:P22466	GALR3	GAL	TRUE	TRUE	FALSE	guidetopharmacology.org	FALSE	0.004	0.031	0.003	0.002	0.005	0.004	0.032	0.003	0.002	0.005	0	0	0	0	0	0	0	0	0	0	0	0	0	0	0
CPI-SS0B84DAE3D	PVR_CD96	simple:P15151	simple:P40200	PVR	CD96	TRUE	TRUE	TRUE	curated	FALSE	0.014	0.016	0	0	0	0.041	0.043	0	0	0	0.013	0.015	0	0	0	0.023	0.025	0	0	0	0.034	0.036	0	0	0
CPI-SS0A8627ED6	PVR_CD226	simple:P15151	simple:Q15762	PVR	CD226	TRUE	TRUE	TRUE	curated	FALSE	0.014	0.043	0.018	0.017	0.021	0.042	0.07	0.046	0.044	0.049	0.014	0.042	0.018	0.016	0.021	0.024	0.052	0.027	0.026	0.03	0.034	0.063	0.038	0.037	0.041
CPI-SS00561BBD7	PVR_TIGIT	simple:P15151	simple:Q495A1	PVR	TIGIT	TRUE	TRUE	FALSE	curated	FALSE	0.014	0.015	0.015	0.015	0	0.042	0.043	0.042	0.042	0	0.014	0.015	0.014	0.014	0	0.024	0.024	0.024	0.024	0	0.034	0.035	0.035	0.035	0
CPI-SS0F1A060D4	PVR_NECTIN3	simple:P15151	simple:Q9NQS3	PVR	NECTIN3	TRUE	TRUE	FALSE	curated	FALSE	0.056	0.197	0.182	0.027	0.259	0.083	0.224	0.21	0.054	0.286	0.055	0.196	0.182	0.026	0.259	0.065	0.206	0.192	0.036	0.268	0.076	0.217	0.203	0.047	0.279
CPI-SS00550260E	CADM3_NECTIN3	simple:Q8N126	simple:Q9NQS3	CADM3	NECTIN3	FALSE	FALSE	FALSE	curated	FALSE	0.091	0.232	0.218	0.062	0.295	0.772	0.914	0.899	0.744	0.976	0.117	0.258	0.243	0.088	0.32	0.09	0.231	0.217	0.061	0.293	0.229	0.37	0.355	0.2	0.432
CPI-SS0B990492C	CADM1_NECTIN3	simple:Q9BY67	simple:Q9NQS3	CADM1	NECTIN3	FALSE	FALSE	FALSE	curated	FALSE	0.838	0.979	0.965	0.809	1.042	3.976	4.117	4.103	3.947	4.179	1.825	1.966	1.951	1.796	2.028	1.127	1.268	1.254	1.098	1.33	2.217	2.358	2.343	2.188	2.42
CPI-SS0C5E9FBFB	NECTIN1_NECTIN3	simple:Q15223	simple:Q9NQS3	NECTIN1	NECTIN3	TRUE	TRUE	FALSE	curated	FALSE	0.237	0.378	0.364	0.208	0.44	0.234	0.375	0.361	0.206	0.438	0.094	0.235	0.221	0.065	0.297	0.07	0.211	0.196	0.041	0.273	0.158	0.299	0.285	0.129	0.362
CPI-SS03859E16F	TIGIT_NECTIN3	simple:Q495A1	simple:Q9NQS3	TIGIT	NECTIN3	FALSE	FALSE	FALSE	curated	FALSE	0.042	0.183	0.169	0.013	0.246	0.043	0.184	0.17	0.014	0.246	0.043	0.184	0.169	0.014	0.246	0.043	0.184	0.169	0.014	0.246	0	0	0	0	0
CPI-SS02FBD007E	NECTIN2_NECTIN3	simple:Q92692	simple:Q9NQS3	NECTIN2	NECTIN3	FALSE	TRUE	FALSE	curated	FALSE	0.044	0.185	0.17	0.015	0.247	0.064	0.205	0.191	0.036	0.268	0.071	0.213	0.198	0.043	0.275	0.059	0.2	0.185	0.03	0.262	0.073	0.215	0.2	0.045	0.277
CPI-SS09C06644C	CADM3_CADM1	simple:Q8N126	simple:Q9BY67	CADM3	CADM1	FALSE	FALSE	FALSE	curated	FALSE	0.846	3.983	1.832	1.135	2.224	1.527	4.665	2.513	1.816	2.905	0.871	4.009	1.858	1.16	2.25	0.845	3.982	1.831	1.134	2.223	0.983	4.121	1.97	1.272	2.362
CPI-SS0889E281D	CADM1_CADM1	simple:Q9BY67	simple:Q9BY67	CADM1	CADM1	FALSE	FALSE	FALSE	curated	FALSE	1.593	4.73	2.579	1.882	2.971	4.73	7.868	5.717	5.019	6.109	2.579	5.717	3.566	2.868	3.958	1.882	5.019	2.868	2.171	3.26	2.971	6.109	3.958	3.26	4.35
CPI-SS0C9696AAA	CRTAM_CADM1	simple:O95727	simple:Q9BY67	CRTAM	CADM1	FALSE	FALSE	FALSE	curated	FALSE	0.797	3.935	1.784	1.086	2.176	0.799	3.936	1.785	1.088	2.177	0	0	0	0	0	0.797	3.935	1.784	1.086	2.176	0.799	3.936	1.785	1.088	2.177
CPI-SS02D18D12B	CADM3_CADM4	simple:Q8N126	simple:Q8NFZ8	CADM3	CADM4	FALSE	FALSE	FALSE	curated	FALSE	0.181	0.27	0.261	0.087	0.346	0.862	0.951	0.942	0.768	1.027	0.206	0.295	0.286	0.112	0.371	0.179	0.269	0.26	0.085	0.344	0.318	0.407	0.398	0.224	0.483
CPI-SS0B3829651	CADM3_EPB41L1	simple:Q8N126	simple:Q9H4G0	CADM3	EPB41L1	FALSE	FALSE	FALSE	curated	FALSE	0.208	1.362	0.205	0.146	0.29	0.889	2.043	0.886	0.827	0.971	0.234	1.387	0.231	0.171	0.315	0.207	1.361	0.204	0.145	0.289	0.346	1.499	0.343	0.283	0.427
CPI-SS00661A3A4	NECTIN1_CADM3	simple:Q15223	simple:Q8N126	NECTIN1	CADM3	TRUE	TRUE	FALSE	curated	FALSE	0.244	0.926	0.27	0.243	0.382	0.242	0.923	0.267	0.241	0.379	0.102	0.783	0.127	0.1	0.239	0.077	0.758	0.103	0.076	0.215	0.166	0.847	0.191	0.165	0.303
CPI-SS01E0F2D2C	NECTIN1_NECTIN4	simple:Q15223	simple:Q96NY8	NECTIN1	NECTIN4	TRUE	TRUE	TRUE	curated	FALSE	0.197	0.227	0.2	0.214	0.207	0.194	0.225	0.197	0.211	0.205	0.054	0.085	0.057	0.071	0.064	0.029	0.06	0.033	0.046	0.04	0.118	0.149	0.121	0.135	0.129
CPI-SS0A5DF05C0	TIGIT_NECTIN2	simple:Q495A1	simple:Q92692	TIGIT	NECTIN2	FALSE	FALSE	TRUE	curated	FALSE	0.002	0.023	0.03	0.017	0.032	0.003	0.024	0.031	0.018	0.033	0.003	0.023	0.03	0.017	0.032	0.003	0.023	0.031	0.018	0.032	0	0	0	0	0
CPI-SS06207F70E	CD226_NECTIN2	simple:Q15762	simple:Q92692	CD226	NECTIN2	FALSE	TRUE	TRUE	curated	FALSE	0.002	0.023	0.03	0.017	0.032	0.031	0.051	0.058	0.045	0.06	0.006	0.027	0.034	0.021	0.036	0.005	0.025	0.032	0.019	0.034	0.009	0.03	0.037	0.024	0.039
CPI-SC01C699B73	COL6A6_a10b1 complex	simple:A6NMZ7	complex:a10b1 complex	COL6A6		TRUE	FALSE	FALSE	curated	TRUE	0.006	0.109	0.025	0.009	0.016	0.033	0.136	0.052	0.037	0.043	0	0	0	0	0	0.006	0.11	0.026	0.01	0.016	0.017	0.12	0.036	0.02	0.027
CPI-SC00A0B0892	COL6A5_a10b1 complex	simple:A8TX70	complex:a10b1 complex	COL6A5		TRUE	FALSE	FALSE	curated	TRUE	0.005	0.108	0.024	0.009	0.015	0.008	0.112	0.028	0.012	0.018	0.005	0.109	0.025	0.009	0.015	0	0	0	0	0	0	0	0	0	0
CPI-SC07ECBFCA7	COL1A1_a10b1 complex	simple:P02452	complex:a10b1 complex	COL1A1		TRUE	FALSE	FALSE	curated	TRUE	0.005	0.108	0.024	0.009	0.015	0.006	0.11	0.026	0.01	0.016	0.047	0.15	0.066	0.051	0.057	0	0	0	0	0	0	0	0	0	0
CPI-SC0DA298BEC	COL2A1_a10b1 complex	simple:P02458	complex:a10b1 complex	COL2A1		TRUE	FALSE	FALSE	curated	TRUE	0.008	0.111	0.027	0.012	0.018	0.009	0.113	0.029	0.013	0.019	0.005	0.109	0.025	0.009	0.015	0.005	0.109	0.025	0.009	0.015	0.007	0.11	0.026	0.011	0.017
CPI-SC067433F6B	COL3A1_a10b1 complex	simple:P02461	complex:a10b1 complex	COL3A1		TRUE	FALSE	FALSE	curated	TRUE	0.005	0.108	0.024	0.009	0.015	0.011	0.114	0.031	0.015	0.021	0.005	0.109	0.025	0.009	0.015	0	0	0	0	0	0.007	0.11	0.026	0.011	0.017
CPI-SC0B6F1A278	COL4A1_a10b1 complex	simple:P02462	complex:a10b1 complex	COL4A1		TRUE	FALSE	FALSE	curated	TRUE	0.01	0.113	0.029	0.013	0.02	0.221	0.325	0.241	0.225	0.231	0.042	0.145	0.061	0.046	0.052	0.018	0.122	0.038	0.022	0.028	0.034	0.137	0.053	0.037	0.044
CPI-SC0D19BAF15	FN1_a10b1 complex	simple:P02751	complex:a10b1 complex	FN1		TRUE	FALSE	FALSE	curated	TRUE	0.005	0.108	0.024	0.009	0.015	0.014	0.118	0.034	0.018	0.024	0.006	0.109	0.025	0.01	0.016	0	0	0	0	0	0.012	0.115	0.031	0.016	0.022
CPI-SC0F516B854	COL5A2_a10b1 complex	simple:P05997	complex:a10b1 complex	COL5A2		TRUE	FALSE	FALSE	curated	TRUE	0.009	0.113	0.029	0.013	0.019	0.107	0.211	0.127	0.111	0.117	0.036	0.139	0.055	0.039	0.046	0.009	0.113	0.029	0.013	0.019	0.007	0.11	0.026	0.011	0.017
CPI-SC011F01833	COL1A2_a10b1 complex	simple:P08123	complex:a10b1 complex	COL1A2		TRUE	FALSE	FALSE	curated	TRUE	0.01	0.113	0.029	0.013	0.02	0.011	0.115	0.031	0.015	0.021	0.068	0.171	0.087	0.072	0.078	0.005	0.109	0.025	0.009	0.015	0	0	0	0	0
CPI-SC0FA79E269	COL4A2_a10b1 complex	simple:P08572	complex:a10b1 complex	COL4A2		TRUE	FALSE	FALSE	curated	TRUE	0.01	0.114	0.03	0.014	0.02	0.388	0.491	0.407	0.391	0.398	0.093	0.197	0.113	0.097	0.103	0.023	0.126	0.043	0.027	0.033	0.07	0.173	0.09	0.074	0.08
CPI-SC04936738A	COL11A1_a10b1 complex	simple:P12107	complex:a10b1 complex	COL11A1		TRUE	FALSE	FALSE	curated	TRUE	0.031	0.134	0.05	0.035	0.041	1.573	1.676	1.592	1.576	1.583	0.18	0.284	0.2	0.184	0.19	0.091	0.194	0.11	0.095	0.101	0.376	0.479	0.395	0.38	0.386
CPI-SC02B111AB0	COL6A1_a10b1 complex	simple:P12109	complex:a10b1 complex	COL6A1		TRUE	FALSE	FALSE	curated	TRUE	0.005	0.108	0.024	0.009	0.015	0.026	0.129	0.045	0.03	0.036	0.005	0.109	0.025	0.009	0.015	0	0	0	0	0	0.009	0.113	0.029	0.013	0.019
CPI-SC0CE851065	COL6A2_a10b1 complex	simple:P12110	complex:a10b1 complex	COL6A2		TRUE	FALSE	FALSE	curated	TRUE	0.007	0.11	0.026	0.011	0.017	0.011	0.114	0.03	0.014	0.021	0	0	0	0	0	0.005	0.109	0.025	0.009	0.015	0	0	0	0	0
CPI-SC07375C073	COL6A3_a10b1 complex	simple:P12111	complex:a10b1 complex	COL6A3		TRUE	FALSE	FALSE	curated	TRUE	0.022	0.125	0.042	0.026	0.032	0.012	0.115	0.031	0.016	0.022	0.008	0.111	0.028	0.012	0.018	0.013	0.116	0.032	0.017	0.023	0.014	0.118	0.034	0.018	0.024
CPI-SC0D6C777F2	COL11A2_a10b1 complex	simple:P13942	complex:a10b1 complex	COL11A2		TRUE	FALSE	FALSE	curated	TRUE	0.039	0.142	0.058	0.043	0.049	0.038	0.141	0.057	0.042	0.048	0.11	0.214	0.13	0.114	0.12	0.011	0.114	0.03	0.015	0.021	0.218	0.322	0.238	0.222	0.228
CPI-SC0F74C069F	COL9A1_a10b1 complex	simple:P20849	complex:a10b1 complex	COL9A1		TRUE	FALSE	FALSE	curated	TRUE	0.02	0.124	0.04	0.024	0.03	0.008	0.112	0.028	0.012	0.018	0.007	0.11	0.026	0.01	0.017	0	0	0	0	0	0.104	0.207	0.123	0.108	0.114
CPI-SC041DEF0FB	COL5A1_a10b1 complex	simple:P20908	complex:a10b1 complex	COL5A1		TRUE	FALSE	FALSE	curated	TRUE	0.005	0.109	0.025	0.009	0.015	0.031	0.134	0.05	0.035	0.041	0.013	0.116	0.032	0.017	0.023	0.005	0.109	0.025	0.009	0.015	0.026	0.13	0.046	0.03	0.036
CPI-SC0C907A888	COL8A2_a10b1 complex	simple:P25067	complex:a10b1 complex	COL8A2		TRUE	FALSE	FALSE	curated	TRUE	0.005	0.108	0.024	0.009	0.015	0.011	0.114	0.03	0.015	0.021	0.006	0.109	0.025	0.01	0.016	0	0	0	0	0	0.007	0.11	0.026	0.011	0.017
CPI-SC08B1D5269	COL5A3_a10b1 complex	simple:P25940	complex:a10b1 complex	COL5A3		TRUE	FALSE	FALSE	curated	TRUE	0.01	0.113	0.029	0.014	0.02	0.03	0.134	0.05	0.034	0.04	0.175	0.279	0.195	0.179	0.185	0.006	0.11	0.026	0.01	0.016	0.235	0.339	0.255	0.239	0.245
CPI-SC0F8101D41	COL8A1_a10b1 complex	simple:P27658	complex:a10b1 complex	COL8A1		TRUE	FALSE	FALSE	curated	TRUE	0.007	0.11	0.026	0.011	0.017	0.131	0.235	0.151	0.135	0.141	0.017	0.12	0.036	0.02	0.027	0.016	0.119	0.035	0.019	0.026	0	0	0	0	0
CPI-SC087556B01	COL4A5_a10b1 complex	simple:P29400	complex:a10b1 complex	COL4A5		TRUE	FALSE	FALSE	curated	TRUE	0.011	0.115	0.031	0.015	0.021	0.174	0.277	0.194	0.178	0.184	0.154	0.257	0.173	0.158	0.164	0.014	0.117	0.033	0.018	0.024	0.009	0.113	0.029	0.013	0.019
CPI-SC08E75294D	COL15A1_a10b1 complex	simple:P39059	complex:a10b1 complex	COL15A1		TRUE	FALSE	FALSE	curated	TRUE	0.016	0.12	0.036	0.02	0.026	0.065	0.168	0.084	0.069	0.075	0.009	0.112	0.028	0.013	0.019	0.078	0.181	0.097	0.082	0.088	0.012	0.115	0.031	0.016	0.022
CPI-SC0017F527E	COL18A1_a10b1 complex	simple:P39060	complex:a10b1 complex	COL18A1		TRUE	FALSE	FALSE	curated	TRUE	0.005	0.109	0.025	0.009	0.015	0.049	0.152	0.068	0.053	0.059	0.006	0.109	0.025	0.01	0.016	0	0	0	0	0	0.075	0.178	0.094	0.079	0.085
CPI-SC00C0800EB	COL4A4_a10b1 complex	simple:P53420	complex:a10b1 complex	COL4A4		TRUE	FALSE	FALSE	curated	TRUE	0.007	0.111	0.027	0.011	0.017	0.049	0.153	0.069	0.053	0.059	0.01	0.114	0.03	0.014	0.02	0.007	0.111	0.027	0.011	0.017	0.017	0.12	0.036	0.02	0.027
CPI-SC0A3F146C2	COL4A3_a10b1 complex	simple:Q01955	complex:a10b1 complex	COL4A3		TRUE	FALSE	FALSE	curated	TRUE	0.005	0.109	0.025	0.009	0.015	0.017	0.121	0.037	0.021	0.027	0.009	0.113	0.029	0.013	0.019	0.005	0.109	0.025	0.009	0.015	0	0	0	0	0
CPI-SC015980AEB	COL14A1_a10b1 complex	simple:Q05707	complex:a10b1 complex	COL14A1		TRUE	FALSE	FALSE	curated	TRUE	0.006	0.109	0.025	0.01	0.016	0.033	0.136	0.052	0.036	0.043	0.009	0.113	0.029	0.013	0.019	0.018	0.122	0.038	0.022	0.028	0	0	0	0	0
CPI-SC0F94B2CF9	COL16A1_a10b1 complex	simple:Q07092	complex:a10b1 complex	COL16A1		TRUE	FALSE	FALSE	curated	TRUE	0.062	0.165	0.081	0.066	0.072	0.222	0.325	0.241	0.226	0.232	0.154	0.257	0.173	0.158	0.164	0.02	0.124	0.04	0.024	0.03	0.177	0.28	0.196	0.181	0.187
CPI-SC05565E8CE	COL4A6_a10b1 complex	simple:Q14031	complex:a10b1 complex	COL4A6		TRUE	FALSE	FALSE	curated	TRUE	0.006	0.109	0.025	0.009	0.016	0.026	0.13	0.046	0.03	0.036	0.007	0.111	0.027	0.011	0.017	0	0	0	0	0	0.012	0.115	0.031	0.016	0.022
CPI-SC067EE23E1	COL9A2_a10b1 complex	simple:Q14055	complex:a10b1 complex	COL9A2		TRUE	FALSE	FALSE	curated	TRUE	0.009	0.113	0.029	0.013	0.019	0.037	0.141	0.057	0.041	0.047	0.012	0.115	0.031	0.015	0.022	0.005	0.109	0.025	0.009	0.015	0.073	0.176	0.092	0.076	0.083
CPI-SC09DFB2ACA	COL19A1_a10b1 complex	simple:Q14993	complex:a10b1 complex	COL19A1		TRUE	FALSE	FALSE	curated	TRUE	0.026	0.13	0.046	0.03	0.036	0.899	1.002	0.918	0.903	0.909	0.113	0.217	0.133	0.117	0.123	0.064	0.167	0.083	0.068	0.074	0.041	0.144	0.06	0.045	0.051
CPI-SC05D8C0EF5	COL28A1_a10b1 complex	simple:Q2UY09	complex:a10b1 complex	COL28A1		TRUE	FALSE	FALSE	curated	TRUE	0.005	0.108	0.024	0.009	0.015	0.013	0.116	0.032	0.016	0.023	0.009	0.113	0.029	0.013	0.019	0	0	0	0	0	0.009	0.113	0.029	0.013	0.019
CPI-SC0725E3A76	COL13A1_a10b1 complex	simple:Q5TAT6	complex:a10b1 complex	COL13A1		FALSE	FALSE	FALSE	curated	TRUE	0.005	0.108	0.024	0.009	0.015	0.016	0.119	0.035	0.02	0.026	0.006	0.109	0.025	0.01	0.016	0	0	0	0	0	0.007	0.11	0.026	0.011	0.017
CPI-SC0C9CBDD21	COL27A1_a10b1 complex	simple:Q8IZC6	complex:a10b1 complex	COL27A1		TRUE	FALSE	FALSE	curated	TRUE	0.007	0.11	0.026	0.011	0.017	0.023	0.126	0.042	0.026	0.033	0.06	0.164	0.08	0.064	0.07	0.336	0.439	0.355	0.34	0.346	0.233	0.336	0.252	0.237	0.243
CPI-SC0147A8A42	COL26A1_a10b1 complex	simple:Q96A83	complex:a10b1 complex	COL26A1		TRUE	FALSE	FALSE	curated	TRUE	0.01	0.113	0.029	0.014	0.02	0.307	0.411	0.327	0.311	0.317	0.026	0.129	0.045	0.03	0.036	0.024	0.127	0.043	0.028	0.034	0.031	0.135	0.051	0.035	0.041
CPI-SC02131C05A	COL12A1_a10b1 complex	simple:Q99715	complex:a10b1 complex	COL12A1		TRUE	FALSE	FALSE	curated	TRUE	0.007	0.11	0.027	0.011	0.017	0.071	0.174	0.09	0.075	0.081	0.033	0.136	0.052	0.037	0.043	0.016	0.119	0.035	0.019	0.026	0.012	0.115	0.031	0.016	0.022
CPI-SC0BF16A11C	COL20A1_a10b1 complex	simple:Q9P218	complex:a10b1 complex	COL20A1		TRUE	FALSE	FALSE	curated	TRUE	0.01	0.114	0.03	0.014	0.02	0.032	0.135	0.051	0.036	0.042	0.017	0.12	0.036	0.02	0.027	0.008	0.112	0.028	0.012	0.018	0.041	0.144	0.06	0.045	0.051
CPI-SC06B4C6DD5	COL17A1_a10b1 complex	simple:Q9UMD9	complex:a10b1 complex	COL17A1		TRUE	FALSE	FALSE	curated	TRUE	0.005	0.109	0.025	0.009	0.015	0.009	0.112	0.028	0.013	0.019	0.005	0.109	0.025	0.009	0.015	0	0	0	0	0	0	0	0	0	0
CPI-SC07E0348EF	COL6A6_a11b1 complex	simple:A6NMZ7	complex:a11b1 complex	COL6A6		TRUE	FALSE	FALSE	curated	TRUE	0.006	0.041	0.015	0.002	0.006	0.034	0.068	0.042	0.029	0.033	0	0	0	0	0	0.007	0.042	0.016	0.003	0.007	0.017	0.052	0.026	0.013	0.017
CPI-SC05CE52A12	COL6A5_a11b1 complex	simple:A8TX70	complex:a11b1 complex	COL6A5		TRUE	FALSE	FALSE	curated	TRUE	0.006	0.04	0.014	0.001	0.005	0.009	0.044	0.018	0.005	0.008	0.006	0.041	0.015	0.002	0.006	0	0	0	0	0	0	0	0	0	0
CPI-SC0F7E26271	COL1A1_a11b1 complex	simple:P02452	complex:a11b1 complex	COL1A1		TRUE	FALSE	FALSE	curated	TRUE	0.006	0.04	0.014	0.001	0.005	0.007	0.042	0.016	0.003	0.007	0.048	0.082	0.056	0.043	0.047	0	0	0	0	0	0	0	0	0	0
CPI-SC0CF621D48	COL2A1_a11b1 complex	simple:P02458	complex:a11b1 complex	COL2A1		TRUE	FALSE	FALSE	curated	TRUE	0.009	0.044	0.018	0.004	0.008	0.01	0.045	0.019	0.006	0.01	0.006	0.041	0.015	0.002	0.006	0.006	0.041	0.015	0.002	0.006	0.008	0.043	0.017	0.003	0.007
CPI-SC0A8902C85	COL3A1_a11b1 complex	simple:P02461	complex:a11b1 complex	COL3A1		TRUE	FALSE	FALSE	curated	TRUE	0.006	0.041	0.014	0.001	0.005	0.012	0.047	0.021	0.007	0.011	0.006	0.041	0.015	0.002	0.006	0	0	0	0	0	0.008	0.043	0.017	0.003	0.007
CPI-SC0A0532ADC	COL4A1_a11b1 complex	simple:P02462	complex:a11b1 complex	COL4A1		TRUE	FALSE	FALSE	curated	TRUE	0.01	0.045	0.019	0.006	0.01	0.222	0.257	0.231	0.218	0.222	0.043	0.078	0.051	0.038	0.042	0.019	0.054	0.028	0.015	0.019	0.034	0.069	0.043	0.03	0.034
CPI-SC0CFF5E19D	FN1_a11b1 complex	simple:P02751	complex:a11b1 complex	FN1		TRUE	FALSE	FALSE	curated	TRUE	0.006	0.041	0.014	0.001	0.005	0.015	0.05	0.024	0.011	0.015	0.007	0.042	0.016	0.002	0.006	0	0	0	0	0	0.013	0.047	0.021	0.008	0.012
CPI-SC0DF641DAA	COL5A2_a11b1 complex	simple:P05997	complex:a11b1 complex	COL5A2		TRUE	FALSE	FALSE	curated	TRUE	0.01	0.045	0.019	0.006	0.01	0.108	0.143	0.117	0.104	0.108	0.036	0.071	0.045	0.032	0.036	0.01	0.045	0.019	0.006	0.009	0.008	0.043	0.017	0.003	0.007
CPI-SC0681D30FE	COL1A2_a11b1 complex	simple:P08123	complex:a11b1 complex	COL1A2		TRUE	FALSE	FALSE	curated	TRUE	0.01	0.045	0.019	0.006	0.01	0.012	0.047	0.021	0.008	0.012	0.069	0.104	0.078	0.064	0.068	0.006	0.041	0.015	0.002	0.006	0	0	0	0	0
CPI-SC02017BE74	COL4A2_a11b1 complex	simple:P08572	complex:a11b1 complex	COL4A2		TRUE	FALSE	FALSE	curated	TRUE	0.011	0.046	0.02	0.007	0.01	0.388	0.423	0.397	0.384	0.388	0.094	0.129	0.103	0.09	0.094	0.024	0.059	0.033	0.019	0.023	0.071	0.106	0.08	0.066	0.07
CPI-SC0861656EC	COL11A1_a11b1 complex	simple:P12107	complex:a11b1 complex	COL11A1		TRUE	FALSE	FALSE	curated	TRUE	0.032	0.067	0.041	0.027	0.031	1.573	1.608	1.582	1.569	1.573	0.181	0.216	0.19	0.177	0.18	0.092	0.126	0.1	0.087	0.091	0.377	0.411	0.385	0.372	0.376
CPI-SC04085F9F9	COL6A1_a11b1 complex	simple:P12109	complex:a11b1 complex	COL6A1		TRUE	FALSE	FALSE	curated	TRUE	0.006	0.04	0.014	0.001	0.005	0.027	0.061	0.035	0.022	0.026	0.006	0.041	0.015	0.002	0.006	0	0	0	0	0	0.01	0.045	0.019	0.006	0.01
CPI-SC0A54B5323	COL6A2_a11b1 complex	simple:P12110	complex:a11b1 complex	COL6A2		TRUE	FALSE	FALSE	curated	TRUE	0.007	0.042	0.016	0.003	0.007	0.011	0.046	0.02	0.007	0.011	0	0	0	0	0	0.006	0.041	0.015	0.002	0.006	0	0	0	0	0
CPI-SC0ECFACED2	COL6A3_a11b1 complex	simple:P12111	complex:a11b1 complex	COL6A3		TRUE	FALSE	FALSE	curated	TRUE	0.023	0.058	0.032	0.018	0.022	0.013	0.047	0.021	0.008	0.012	0.009	0.044	0.018	0.004	0.008	0.014	0.048	0.022	0.009	0.013	0.015	0.05	0.024	0.011	0.015
CPI-SC0CA323AE3	COL11A2_a11b1 complex	simple:P13942	complex:a11b1 complex	COL11A2		TRUE	FALSE	FALSE	curated	TRUE	0.04	0.074	0.048	0.035	0.039	0.039	0.074	0.047	0.034	0.038	0.111	0.146	0.12	0.107	0.111	0.012	0.047	0.021	0.007	0.011	0.219	0.254	0.228	0.215	0.218
CPI-SC0CBC30AB7	COL9A1_a11b1 complex	simple:P20849	complex:a11b1 complex	COL9A1		TRUE	FALSE	FALSE	curated	TRUE	0.021	0.056	0.03	0.017	0.021	0.009	0.044	0.018	0.005	0.008	0.007	0.042	0.016	0.003	0.007	0	0	0	0	0	0.105	0.14	0.114	0.1	0.104
CPI-SC0092846B0	COL5A1_a11b1 complex	simple:P20908	complex:a11b1 complex	COL5A1		TRUE	FALSE	FALSE	curated	TRUE	0.006	0.041	0.015	0.002	0.006	0.032	0.066	0.04	0.027	0.031	0.014	0.049	0.023	0.009	0.013	0.006	0.041	0.015	0.002	0.006	0.027	0.062	0.036	0.023	0.027
CPI-SC08AF9CA91	COL8A2_a11b1 complex	simple:P25067	complex:a11b1 complex	COL8A2		TRUE	FALSE	FALSE	curated	TRUE	0.006	0.04	0.014	0.001	0.005	0.011	0.046	0.02	0.007	0.011	0.007	0.042	0.016	0.002	0.006	0	0	0	0	0	0.008	0.043	0.017	0.003	0.007
CPI-SC07E958BDE	COL5A3_a11b1 complex	simple:P25940	complex:a11b1 complex	COL5A3		TRUE	FALSE	FALSE	curated	TRUE	0.011	0.046	0.02	0.006	0.01	0.031	0.066	0.04	0.027	0.031	0.176	0.211	0.185	0.172	0.176	0.007	0.042	0.016	0.003	0.007	0.236	0.271	0.245	0.232	0.235
CPI-SC08CC68F11	COL8A1_a11b1 complex	simple:P27658	complex:a11b1 complex	COL8A1		TRUE	FALSE	FALSE	curated	TRUE	0.008	0.043	0.017	0.003	0.007	0.132	0.167	0.141	0.128	0.132	0.017	0.052	0.026	0.013	0.017	0.016	0.051	0.025	0.012	0.016	0	0	0	0	0
CPI-SC0CE433AB8	COL4A5_a11b1 complex	simple:P29400	complex:a11b1 complex	COL4A5		TRUE	FALSE	FALSE	curated	TRUE	0.012	0.047	0.021	0.008	0.012	0.175	0.21	0.184	0.17	0.174	0.155	0.19	0.164	0.15	0.154	0.015	0.049	0.023	0.01	0.014	0.01	0.045	0.019	0.006	0.01
CPI-SC03BFF1D95	COL15A1_a11b1 complex	simple:P39059	complex:a11b1 complex	COL15A1		TRUE	FALSE	FALSE	curated	TRUE	0.017	0.052	0.026	0.013	0.017	0.066	0.1	0.074	0.061	0.065	0.01	0.044	0.018	0.005	0.009	0.079	0.113	0.087	0.074	0.078	0.013	0.047	0.021	0.008	0.012
CPI-SC03ADD2063	COL18A1_a11b1 complex	simple:P39060	complex:a11b1 complex	COL18A1		TRUE	FALSE	FALSE	curated	TRUE	0.006	0.041	0.015	0.002	0.006	0.05	0.084	0.058	0.045	0.049	0.007	0.042	0.016	0.002	0.006	0	0	0	0	0	0.076	0.111	0.084	0.071	0.075
CPI-SC0082A7233	COL4A4_a11b1 complex	simple:P53420	complex:a11b1 complex	COL4A4		TRUE	FALSE	FALSE	curated	TRUE	0.008	0.043	0.017	0.004	0.008	0.05	0.085	0.059	0.046	0.05	0.011	0.046	0.02	0.007	0.01	0.008	0.043	0.017	0.004	0.008	0.017	0.052	0.026	0.013	0.017
CPI-SC0674C647E	COL4A3_a11b1 complex	simple:Q01955	complex:a11b1 complex	COL4A3		TRUE	FALSE	FALSE	curated	TRUE	0.006	0.041	0.015	0.002	0.006	0.018	0.053	0.027	0.014	0.017	0.01	0.045	0.019	0.006	0.01	0.006	0.041	0.015	0.002	0.006	0	0	0	0	0
CPI-SC060984F83	COL14A1_a11b1 complex	simple:Q05707	complex:a11b1 complex	COL14A1		TRUE	FALSE	FALSE	curated	TRUE	0.007	0.041	0.015	0.002	0.006	0.033	0.068	0.042	0.029	0.033	0.01	0.045	0.019	0.006	0.01	0.019	0.054	0.028	0.015	0.019	0	0	0	0	0
CPI-SC0014D5A6E	COL16A1_a11b1 complex	simple:Q07092	complex:a11b1 complex	COL16A1		TRUE	FALSE	FALSE	curated	TRUE	0.063	0.098	0.071	0.058	0.062	0.223	0.258	0.231	0.218	0.222	0.155	0.19	0.164	0.15	0.154	0.021	0.056	0.03	0.017	0.021	0.178	0.212	0.186	0.173	0.177
CPI-SC0B066E03C	COL4A6_a11b1 complex	simple:Q14031	complex:a11b1 complex	COL4A6		TRUE	FALSE	FALSE	curated	TRUE	0.006	0.041	0.015	0.002	0.006	0.027	0.062	0.036	0.023	0.026	0.008	0.043	0.017	0.004	0.008	0	0	0	0	0	0.013	0.047	0.021	0.008	0.012
CPI-SC0247E9ADB	COL9A2_a11b1 complex	simple:Q14055	complex:a11b1 complex	COL9A2		TRUE	FALSE	FALSE	curated	TRUE	0.01	0.045	0.019	0.006	0.01	0.038	0.073	0.047	0.034	0.038	0.012	0.047	0.021	0.008	0.012	0.006	0.041	0.015	0.002	0.006	0.073	0.108	0.082	0.069	0.073
CPI-SC0035F0B0F	COL19A1_a11b1 complex	simple:Q14993	complex:a11b1 complex	COL19A1		TRUE	FALSE	FALSE	curated	TRUE	0.027	0.062	0.036	0.023	0.026	0.9	0.934	0.908	0.895	0.899	0.114	0.149	0.123	0.11	0.113	0.065	0.1	0.073	0.06	0.064	0.042	0.077	0.051	0.037	0.041
CPI-SC069F9E62C	COL28A1_a11b1 complex	simple:Q2UY09	complex:a11b1 complex	COL28A1		TRUE	FALSE	FALSE	curated	TRUE	0.006	0.04	0.014	0.001	0.005	0.013	0.048	0.022	0.009	0.013	0.01	0.045	0.019	0.006	0.01	0	0	0	0	0	0.01	0.045	0.019	0.006	0.01
CPI-SC0D2BDC009	COL13A1_a11b1 complex	simple:Q5TAT6	complex:a11b1 complex	COL13A1		FALSE	FALSE	FALSE	curated	TRUE	0.006	0.04	0.014	0.001	0.005	0.017	0.051	0.025	0.012	0.016	0.007	0.042	0.016	0.002	0.006	0	0	0	0	0	0.008	0.043	0.017	0.003	0.007
CPI-SC05F111D21	COL27A1_a11b1 complex	simple:Q8IZC6	complex:a11b1 complex	COL27A1		TRUE	FALSE	FALSE	curated	TRUE	0.008	0.043	0.017	0.003	0.007	0.023	0.058	0.032	0.019	0.023	0.061	0.096	0.07	0.057	0.061	0.336	0.371	0.345	0.332	0.336	0.233	0.268	0.242	0.229	0.233
CPI-SC041215790	COL26A1_a11b1 complex	simple:Q96A83	complex:a11b1 complex	COL26A1		TRUE	FALSE	FALSE	curated	TRUE	0.011	0.046	0.02	0.006	0.01	0.308	0.343	0.317	0.304	0.308	0.026	0.061	0.035	0.022	0.026	0.025	0.06	0.034	0.02	0.024	0.032	0.067	0.041	0.028	0.032
CPI-SC05B2AA866	COL12A1_a11b1 complex	simple:Q99715	complex:a11b1 complex	COL12A1		TRUE	FALSE	FALSE	curated	TRUE	0.008	0.043	0.017	0.003	0.007	0.071	0.106	0.08	0.067	0.071	0.034	0.068	0.042	0.029	0.033	0.016	0.051	0.025	0.012	0.016	0.013	0.047	0.021	0.008	0.012
CPI-SC051B1E9C4	COL20A1_a11b1 complex	simple:Q9P218	complex:a11b1 complex	COL20A1		TRUE	FALSE	FALSE	curated	TRUE	0.011	0.046	0.02	0.007	0.011	0.033	0.067	0.041	0.028	0.032	0.017	0.052	0.026	0.013	0.017	0.009	0.044	0.018	0.005	0.009	0.042	0.077	0.051	0.037	0.041
CPI-SC0247375A7	COL17A1_a11b1 complex	simple:Q9UMD9	complex:a11b1 complex	COL17A1		TRUE	FALSE	FALSE	curated	TRUE	0.006	0.041	0.015	0.002	0.006	0.01	0.044	0.018	0.005	0.009	0.006	0.041	0.015	0.002	0.006	0	0	0	0	0	0	0	0	0	0
CPI-SC0B808E56A	COL6A6_a1b1 complex	simple:A6NMZ7	complex:a1b1 complex	COL6A6		TRUE	FALSE	FALSE	curated	TRUE	0.004	0.051	0.025	0.007	0	0.031	0.078	0.052	0.034	0	0	0	0	0	0	0.005	0.052	0.026	0.007	0	0.015	0.062	0.036	0.018	0
CPI-SC089D4762F	COL6A5_a1b1 complex	simple:A8TX70	complex:a1b1 complex	COL6A5		TRUE	FALSE	FALSE	curated	TRUE	0.003	0.05	0.024	0.006	0	0.007	0.053	0.028	0.009	0	0.004	0.051	0.025	0.006	0	0	0	0	0	0	0	0	0	0	0
CPI-SC0F73E9099	COL1A1_a1b1 complex	simple:P02452	complex:a1b1 complex	COL1A1		TRUE	FALSE	FALSE	curated	TRUE	0.003	0.05	0.024	0.006	0	0.005	0.052	0.026	0.007	0	0.046	0.092	0.066	0.048	0	0	0	0	0	0	0	0	0	0	0
CPI-SC016235D3A	COL2A1_a1b1 complex	simple:P02458	complex:a1b1 complex	COL2A1		TRUE	FALSE	FALSE	curated	TRUE	0.007	0.053	0.027	0.009	0	0.008	0.055	0.029	0.01	0	0.004	0.051	0.025	0.006	0	0.004	0.051	0.025	0.006	0	0.006	0.052	0.026	0.008	0
CPI-SC0BC63F8C0	COL3A1_a1b1 complex	simple:P02461	complex:a1b1 complex	COL3A1		TRUE	FALSE	FALSE	curated	TRUE	0.004	0.05	0.024	0.006	0	0.01	0.056	0.031	0.012	0	0.004	0.051	0.025	0.006	0	0	0	0	0	0	0.006	0.052	0.026	0.008	0
CPI-SC0672FBD31	COL4A1_a1b1 complex	simple:P02462	complex:a1b1 complex	COL4A1		TRUE	FALSE	FALSE	curated	TRUE	0.008	0.055	0.029	0.011	0	0.22	0.267	0.241	0.222	0	0.041	0.087	0.061	0.043	0	0.017	0.064	0.038	0.019	0	0.032	0.079	0.053	0.035	0
CPI-SC0545E2502	COL5A2_a1b1 complex	simple:P05997	complex:a1b1 complex	COL5A2		TRUE	FALSE	FALSE	curated	TRUE	0.008	0.055	0.029	0.01	0	0.106	0.153	0.127	0.108	0	0.034	0.081	0.055	0.037	0	0.008	0.054	0.029	0.01	0	0.006	0.052	0.026	0.008	0
CPI-SC006E22794	COL1A2_a1b1 complex	simple:P08123	complex:a1b1 complex	COL1A2		TRUE	FALSE	FALSE	curated	TRUE	0.008	0.055	0.029	0.011	0	0.01	0.057	0.031	0.012	0	0.067	0.113	0.087	0.069	0	0.004	0.051	0.025	0.006	0	0	0	0	0	0
CPI-SC0458F68A5	COL4A2_a1b1 complex	simple:P08572	complex:a1b1 complex	COL4A2		TRUE	FALSE	FALSE	curated	TRUE	0.009	0.055	0.03	0.011	0	0.386	0.433	0.407	0.389	0	0.092	0.139	0.113	0.094	0	0.022	0.068	0.043	0.024	0	0.069	0.115	0.09	0.071	0
CPI-SC06E5E0C83	COL11A1_a1b1 complex	simple:P12107	complex:a1b1 complex	COL11A1		TRUE	FALSE	FALSE	curated	TRUE	0.03	0.076	0.05	0.032	0	1.571	1.618	1.592	1.574	0	0.179	0.225	0.2	0.181	0	0.089	0.136	0.11	0.092	0	0.375	0.421	0.395	0.377	0
CPI-SC09FDA4F45	COL6A1_a1b1 complex	simple:P12109	complex:a1b1 complex	COL6A1		TRUE	FALSE	FALSE	curated	TRUE	0.004	0.05	0.024	0.006	0	0.025	0.071	0.045	0.027	0	0.004	0.051	0.025	0.006	0	0	0	0	0	0	0.008	0.055	0.029	0.01	0
CPI-SC0F4BC2909	COL6A2_a1b1 complex	simple:P12110	complex:a1b1 complex	COL6A2		TRUE	FALSE	FALSE	curated	TRUE	0.005	0.052	0.026	0.008	0	0.009	0.056	0.03	0.012	0	0	0	0	0	0	0.004	0.051	0.025	0.006	0	0	0	0	0	0
CPI-SC02AE206BE	COL6A3_a1b1 complex	simple:P12111	complex:a1b1 complex	COL6A3		TRUE	FALSE	FALSE	curated	TRUE	0.021	0.067	0.042	0.023	0	0.01	0.057	0.031	0.013	0	0.007	0.053	0.028	0.009	0	0.012	0.058	0.032	0.014	0	0.013	0.06	0.034	0.015	0
CPI-SC0A8E69BC5	COL11A2_a1b1 complex	simple:P13942	complex:a1b1 complex	COL11A2		TRUE	FALSE	FALSE	curated	TRUE	0.038	0.084	0.058	0.04	0	0.037	0.083	0.057	0.039	0	0.109	0.156	0.13	0.111	0	0.01	0.056	0.03	0.012	0	0.217	0.263	0.238	0.219	0
CPI-SC05B6D413B	COL9A1_a1b1 complex	simple:P20849	complex:a1b1 complex	COL9A1		TRUE	FALSE	FALSE	curated	TRUE	0.019	0.065	0.04	0.021	0	0.007	0.053	0.028	0.009	0	0.005	0.052	0.026	0.008	0	0	0	0	0	0	0.103	0.149	0.123	0.105	0
CPI-SC05992FDC8	COL5A1_a1b1 complex	simple:P20908	complex:a1b1 complex	COL5A1		TRUE	FALSE	FALSE	curated	TRUE	0.004	0.05	0.025	0.006	0	0.029	0.076	0.05	0.032	0	0.012	0.058	0.032	0.014	0	0.004	0.051	0.025	0.006	0	0.025	0.072	0.046	0.027	0
CPI-SC069F95780	COL8A2_a1b1 complex	simple:P25067	complex:a1b1 complex	COL8A2		TRUE	FALSE	FALSE	curated	TRUE	0.004	0.05	0.024	0.006	0	0.009	0.056	0.03	0.012	0	0.005	0.051	0.025	0.007	0	0	0	0	0	0	0.006	0.052	0.026	0.008	0
CPI-SC0DAD29856	COL5A3_a1b1 complex	simple:P25940	complex:a1b1 complex	COL5A3		TRUE	FALSE	FALSE	curated	TRUE	0.009	0.055	0.029	0.011	0	0.029	0.076	0.05	0.031	0	0.174	0.22	0.195	0.176	0	0.005	0.052	0.026	0.007	0	0.234	0.28	0.255	0.236	0
CPI-SC02F06FF62	COL8A1_a1b1 complex	simple:P27658	complex:a1b1 complex	COL8A1		TRUE	FALSE	FALSE	curated	TRUE	0.006	0.052	0.026	0.008	0	0.13	0.177	0.151	0.132	0	0.015	0.062	0.036	0.018	0	0.014	0.061	0.035	0.017	0	0	0	0	0	0
CPI-SC0EC572716	COL4A5_a1b1 complex	simple:P29400	complex:a1b1 complex	COL4A5		TRUE	FALSE	FALSE	curated	TRUE	0.01	0.057	0.031	0.012	0	0.173	0.219	0.194	0.175	0	0.153	0.199	0.173	0.155	0	0.013	0.059	0.033	0.015	0	0.008	0.055	0.029	0.01	0
CPI-SC0F8D27FBC	COL15A1_a1b1 complex	simple:P39059	complex:a1b1 complex	COL15A1		TRUE	FALSE	FALSE	curated	TRUE	0.015	0.062	0.036	0.017	0	0.064	0.11	0.084	0.066	0	0.007	0.054	0.028	0.01	0	0.077	0.123	0.097	0.079	0	0.011	0.057	0.031	0.013	0
CPI-SC0EA3FC100	COL18A1_a1b1 complex	simple:P39060	complex:a1b1 complex	COL18A1		TRUE	FALSE	FALSE	curated	TRUE	0.004	0.05	0.025	0.006	0	0.047	0.094	0.068	0.05	0	0.005	0.051	0.025	0.007	0	0	0	0	0	0	0.074	0.12	0.094	0.076	0
CPI-SC091173D82	COL4A4_a1b1 complex	simple:P53420	complex:a1b1 complex	COL4A4		TRUE	FALSE	FALSE	curated	TRUE	0.006	0.053	0.027	0.008	0	0.048	0.095	0.069	0.05	0	0.009	0.055	0.03	0.011	0	0.006	0.053	0.027	0.008	0	0.015	0.062	0.036	0.018	0
CPI-SC07FB88720	COL4A3_a1b1 complex	simple:Q01955	complex:a1b1 complex	COL4A3		TRUE	FALSE	FALSE	curated	TRUE	0.004	0.051	0.025	0.006	0	0.016	0.062	0.037	0.018	0	0.008	0.055	0.029	0.011	0	0.004	0.051	0.025	0.006	0	0	0	0	0	0
CPI-SC0BD4C290F	COL14A1_a1b1 complex	simple:Q05707	complex:a1b1 complex	COL14A1		TRUE	FALSE	FALSE	curated	TRUE	0.005	0.051	0.025	0.007	0	0.031	0.078	0.052	0.034	0	0.008	0.055	0.029	0.011	0	0.017	0.064	0.038	0.019	0	0	0	0	0	0
CPI-SC053BBE2B1	COL16A1_a1b1 complex	simple:Q07092	complex:a1b1 complex	COL16A1		TRUE	FALSE	FALSE	curated	TRUE	0.061	0.107	0.081	0.063	0	0.221	0.267	0.241	0.223	0	0.153	0.199	0.173	0.155	0	0.019	0.066	0.04	0.021	0	0.176	0.222	0.196	0.178	0
CPI-SC0DA5EFA18	COL4A6_a1b1 complex	simple:Q14031	complex:a1b1 complex	COL4A6		TRUE	FALSE	FALSE	curated	TRUE	0.004	0.051	0.025	0.007	0	0.025	0.071	0.046	0.027	0	0.006	0.053	0.027	0.008	0	0	0	0	0	0	0.011	0.057	0.031	0.013	0
CPI-SC0F590482E	COL9A2_a1b1 complex	simple:Q14055	complex:a1b1 complex	COL9A2		TRUE	FALSE	FALSE	curated	TRUE	0.008	0.055	0.029	0.01	0	0.036	0.083	0.057	0.038	0	0.01	0.057	0.031	0.013	0	0.004	0.051	0.025	0.006	0	0.071	0.118	0.092	0.074	0
CPI-SC0BA41B0D3	COL19A1_a1b1 complex	simple:Q14993	complex:a1b1 complex	COL19A1		TRUE	FALSE	FALSE	curated	TRUE	0.025	0.071	0.046	0.027	0	0.898	0.944	0.918	0.9	0	0.112	0.158	0.133	0.114	0	0.063	0.109	0.083	0.065	0	0.04	0.086	0.06	0.042	0
CPI-SC0FF018913	COL28A1_a1b1 complex	simple:Q2UY09	complex:a1b1 complex	COL28A1		TRUE	FALSE	FALSE	curated	TRUE	0.004	0.05	0.024	0.006	0	0.011	0.058	0.032	0.014	0	0.008	0.055	0.029	0.011	0	0	0	0	0	0	0.008	0.055	0.029	0.01	0
CPI-SC08BF895FC	COL13A1_a1b1 complex	simple:Q5TAT6	complex:a1b1 complex	COL13A1		FALSE	FALSE	FALSE	curated	TRUE	0.003	0.05	0.024	0.006	0	0.014	0.061	0.035	0.017	0	0.005	0.051	0.025	0.007	0	0	0	0	0	0	0.006	0.052	0.026	0.008	0
CPI-SC0D7F33CFB	COL27A1_a1b1 complex	simple:Q8IZC6	complex:a1b1 complex	COL27A1		TRUE	FALSE	FALSE	curated	TRUE	0.006	0.052	0.026	0.008	0	0.021	0.068	0.042	0.024	0	0.059	0.106	0.08	0.061	0	0.334	0.381	0.355	0.337	0	0.231	0.278	0.252	0.234	0
CPI-SC0EACF2D60	COL26A1_a1b1 complex	simple:Q96A83	complex:a1b1 complex	COL26A1		TRUE	FALSE	FALSE	curated	TRUE	0.009	0.055	0.029	0.011	0	0.306	0.353	0.327	0.308	0	0.024	0.071	0.045	0.027	0	0.023	0.069	0.043	0.025	0	0.03	0.077	0.051	0.032	0
CPI-SC004A436C5	COL12A1_a1b1 complex	simple:Q99715	complex:a1b1 complex	COL12A1		TRUE	FALSE	FALSE	curated	TRUE	0.006	0.052	0.027	0.008	0	0.069	0.116	0.09	0.072	0	0.031	0.078	0.052	0.034	0	0.014	0.061	0.035	0.017	0	0.011	0.057	0.031	0.013	0
CPI-SC00BE2EEE3	COL20A1_a1b1 complex	simple:Q9P218	complex:a1b1 complex	COL20A1		TRUE	FALSE	FALSE	curated	TRUE	0.009	0.056	0.03	0.011	0	0.031	0.077	0.051	0.033	0	0.015	0.062	0.036	0.018	0	0.007	0.054	0.028	0.009	0	0.04	0.086	0.06	0.042	0
CPI-SC08AA91C84	COL17A1_a1b1 complex	simple:Q9UMD9	complex:a1b1 complex	COL17A1		TRUE	FALSE	FALSE	curated	TRUE	0.004	0.05	0.025	0.006	0	0.008	0.054	0.028	0.01	0	0.004	0.051	0.025	0.006	0	0	0	0	0	0	0	0	0	0	0
CPI-SC0EAF80261	SEMA7A_a1b1 complex	simple:O75326	complex:a1b1 complex	SEMA7A		FALSE	FALSE	FALSE	curated	TRUE	0.062	0.109	0.083	0.065	0	0.184	0.231	0.205	0.187	0	0.043	0.09	0.064	0.046	0	0.033	0.08	0.054	0.035	0	0.054	0.101	0.075	0.057	0
CPI-SC05D87F723	COL6A6_a2b1 complex	simple:A6NMZ7	complex:a2b1 complex	COL6A6		TRUE	FALSE	FALSE	curated	TRUE	0.005	0.043	0.022	0.002	0.008	0.032	0.07	0.049	0.029	0.036	0	0	0	0	0	0.006	0.044	0.022	0.003	0.009	0.016	0.054	0.033	0.013	0.019
CPI-SC0606C6896	COL6A5_a2b1 complex	simple:A8TX70	complex:a2b1 complex	COL6A5		TRUE	FALSE	FALSE	curated	TRUE	0.004	0.042	0.021	0.001	0.007	0.008	0.045	0.024	0.005	0.011	0.005	0.042	0.021	0.002	0.008	0	0	0	0	0	0	0	0	0	0
CPI-SC01EA4FF6B	COL1A1_a2b1 complex	simple:P02452	complex:a2b1 complex	COL1A1		TRUE	FALSE	FALSE	curated	TRUE	0.004	0.042	0.021	0.001	0.007	0.006	0.043	0.022	0.003	0.009	0.046	0.084	0.063	0.043	0.05	0	0	0	0	0	0	0	0	0	0
CPI-SC036D78A43	COL2A1_a2b1 complex	simple:P02458	complex:a2b1 complex	COL2A1		TRUE	FALSE	FALSE	curated	TRUE	0.007	0.045	0.024	0.004	0.011	0.009	0.047	0.025	0.006	0.012	0.005	0.042	0.021	0.002	0.008	0.005	0.043	0.021	0.002	0.008	0.006	0.044	0.023	0.003	0.01
CPI-SC054484F7B	COL3A1_a2b1 complex	simple:P02461	complex:a2b1 complex	COL3A1		TRUE	FALSE	FALSE	curated	TRUE	0.004	0.042	0.021	0.001	0.008	0.01	0.048	0.027	0.007	0.014	0.005	0.042	0.021	0.002	0.008	0	0	0	0	0	0.006	0.044	0.023	0.003	0.01
CPI-SC02392F4AF	COL4A1_a2b1 complex	simple:P02462	complex:a2b1 complex	COL4A1		TRUE	FALSE	FALSE	curated	TRUE	0.009	0.047	0.025	0.006	0.012	0.221	0.258	0.237	0.218	0.224	0.041	0.079	0.058	0.038	0.045	0.018	0.056	0.034	0.015	0.021	0.033	0.071	0.05	0.03	0.036
CPI-SC01FFC9392	FN1_a2b1 complex	simple:P02751	complex:a2b1 complex	FN1		TRUE	FALSE	FALSE	curated	TRUE	0.004	0.042	0.021	0.001	0.008	0.014	0.051	0.03	0.011	0.017	0.005	0.043	0.022	0.002	0.009	0	0	0	0	0	0.011	0.049	0.028	0.008	0.015
CPI-SC0CA7B34A5	COL5A2_a2b1 complex	simple:P05997	complex:a2b1 complex	COL5A2		TRUE	FALSE	FALSE	curated	TRUE	0.009	0.047	0.025	0.006	0.012	0.107	0.144	0.123	0.104	0.11	0.035	0.073	0.051	0.032	0.038	0.009	0.046	0.025	0.006	0.012	0.006	0.044	0.023	0.003	0.01
CPI-SC05CCF815E	COL1A2_a2b1 complex	simple:P08123	complex:a2b1 complex	COL1A2		TRUE	FALSE	FALSE	curated	TRUE	0.009	0.047	0.026	0.006	0.012	0.011	0.048	0.027	0.008	0.014	0.067	0.105	0.084	0.064	0.071	0.005	0.043	0.021	0.002	0.008	0	0	0	0	0
CPI-SC07222A428	COL4A2_a2b1 complex	simple:P08572	complex:a2b1 complex	COL4A2		TRUE	FALSE	FALSE	curated	TRUE	0.009	0.047	0.026	0.007	0.013	0.387	0.425	0.404	0.384	0.39	0.093	0.131	0.109	0.09	0.096	0.022	0.06	0.039	0.019	0.026	0.069	0.107	0.086	0.066	0.073
CPI-SC0FBFA176B	COL11A1_a2b1 complex	simple:P12107	complex:a2b1 complex	COL11A1		TRUE	FALSE	FALSE	curated	TRUE	0.03	0.068	0.047	0.027	0.034	1.572	1.61	1.588	1.569	1.575	0.179	0.217	0.196	0.177	0.183	0.09	0.128	0.107	0.087	0.094	0.375	0.413	0.392	0.372	0.379
CPI-SC08D8A859F	COL6A1_a2b1 complex	simple:P12109	complex:a2b1 complex	COL6A1		TRUE	FALSE	FALSE	curated	TRUE	0.004	0.042	0.021	0.001	0.008	0.025	0.063	0.042	0.022	0.029	0.005	0.042	0.021	0.002	0.008	0	0	0	0	0	0.009	0.047	0.025	0.006	0.012
CPI-SC0814068D9	COL6A2_a2b1 complex	simple:P12110	complex:a2b1 complex	COL6A2		TRUE	FALSE	FALSE	curated	TRUE	0.006	0.044	0.023	0.003	0.009	0.01	0.048	0.026	0.007	0.013	0	0	0	0	0	0.005	0.043	0.021	0.002	0.008	0	0	0	0	0
CPI-SC0D870AE49	COL6A3_a2b1 complex	simple:P12111	complex:a2b1 complex	COL6A3		TRUE	FALSE	FALSE	curated	TRUE	0.021	0.059	0.038	0.018	0.025	0.011	0.049	0.028	0.008	0.015	0.007	0.045	0.024	0.004	0.011	0.012	0.05	0.029	0.009	0.016	0.014	0.051	0.03	0.011	0.017
CPI-SC0E4E54E13	COL11A2_a2b1 complex	simple:P13942	complex:a2b1 complex	COL11A2		TRUE	FALSE	FALSE	curated	TRUE	0.038	0.076	0.055	0.035	0.042	0.037	0.075	0.054	0.034	0.041	0.11	0.147	0.126	0.107	0.113	0.01	0.048	0.027	0.007	0.014	0.217	0.255	0.234	0.215	0.221
CPI-SC08F797F90	COL9A1_a2b1 complex	simple:P20849	complex:a2b1 complex	COL9A1		TRUE	FALSE	FALSE	curated	TRUE	0.02	0.057	0.036	0.017	0.023	0.008	0.045	0.024	0.005	0.011	0.006	0.044	0.023	0.003	0.009	0	0	0	0	0	0.103	0.141	0.12	0.1	0.107
CPI-SC035134F18	COL5A1_a2b1 complex	simple:P20908	complex:a2b1 complex	COL5A1		TRUE	FALSE	FALSE	curated	TRUE	0.005	0.042	0.021	0.002	0.008	0.03	0.068	0.047	0.027	0.034	0.012	0.05	0.029	0.009	0.016	0.005	0.043	0.021	0.002	0.008	0.026	0.064	0.042	0.023	0.029
CPI-SC04B354AE3	COL8A2_a2b1 complex	simple:P25067	complex:a2b1 complex	COL8A2		TRUE	FALSE	FALSE	curated	TRUE	0.004	0.042	0.021	0.001	0.008	0.01	0.048	0.027	0.007	0.013	0.005	0.043	0.022	0.002	0.009	0	0	0	0	0	0.006	0.044	0.023	0.003	0.01
CPI-SC0FC645961	COL5A3_a2b1 complex	simple:P25940	complex:a2b1 complex	COL5A3		TRUE	FALSE	FALSE	curated	TRUE	0.009	0.047	0.026	0.006	0.013	0.03	0.067	0.046	0.027	0.033	0.175	0.212	0.191	0.172	0.178	0.006	0.044	0.022	0.003	0.009	0.234	0.272	0.251	0.232	0.238
CPI-SC058845C44	COL8A1_a2b1 complex	simple:P27658	complex:a2b1 complex	COL8A1		TRUE	FALSE	FALSE	curated	TRUE	0.006	0.044	0.023	0.003	0.01	0.131	0.168	0.147	0.128	0.134	0.016	0.054	0.032	0.013	0.019	0.015	0.053	0.032	0.012	0.018	0	0	0	0	0
CPI-SC09C0B5D08	COL4A5_a2b1 complex	simple:P29400	complex:a2b1 complex	COL4A5		TRUE	FALSE	FALSE	curated	TRUE	0.011	0.049	0.027	0.008	0.014	0.173	0.211	0.19	0.17	0.177	0.153	0.191	0.17	0.15	0.157	0.013	0.051	0.03	0.01	0.017	0.009	0.047	0.025	0.006	0.012
CPI-SC039D075C6	COL15A1_a2b1 complex	simple:P39059	complex:a2b1 complex	COL15A1		TRUE	FALSE	FALSE	curated	TRUE	0.016	0.053	0.032	0.013	0.019	0.064	0.102	0.081	0.061	0.068	0.008	0.046	0.025	0.005	0.012	0.077	0.115	0.094	0.074	0.081	0.011	0.049	0.028	0.008	0.015
CPI-SC04B0064C4	COL18A1_a2b1 complex	simple:P39060	complex:a2b1 complex	COL18A1		TRUE	FALSE	FALSE	curated	TRUE	0.005	0.042	0.021	0.002	0.008	0.048	0.086	0.065	0.045	0.052	0.005	0.043	0.022	0.002	0.009	0	0	0	0	0	0.074	0.112	0.091	0.071	0.078
CPI-SC03DD752AB	COL4A4_a2b1 complex	simple:P53420	complex:a2b1 complex	COL4A4		TRUE	FALSE	FALSE	curated	TRUE	0.007	0.045	0.023	0.004	0.01	0.049	0.087	0.065	0.046	0.052	0.01	0.047	0.026	0.007	0.013	0.007	0.044	0.023	0.004	0.01	0.016	0.054	0.033	0.013	0.019
CPI-SC052A417CB	COL4A3_a2b1 complex	simple:Q01955	complex:a2b1 complex	COL4A3		TRUE	FALSE	FALSE	curated	TRUE	0.005	0.043	0.021	0.002	0.008	0.016	0.054	0.033	0.014	0.02	0.009	0.047	0.025	0.006	0.012	0.005	0.043	0.021	0.002	0.008	0	0	0	0	0
CPI-SC0E0C50FCA	COL14A1_a2b1 complex	simple:Q05707	complex:a2b1 complex	COL14A1		TRUE	FALSE	FALSE	curated	TRUE	0.005	0.043	0.022	0.002	0.009	0.032	0.07	0.049	0.029	0.035	0.009	0.047	0.025	0.006	0.012	0.018	0.056	0.034	0.015	0.021	0	0	0	0	0
CPI-SC01E9FAC20	COL16A1_a2b1 complex	simple:Q07092	complex:a2b1 complex	COL16A1		TRUE	FALSE	FALSE	curated	TRUE	0.061	0.099	0.078	0.058	0.065	0.221	0.259	0.238	0.218	0.225	0.153	0.191	0.17	0.15	0.157	0.02	0.057	0.036	0.017	0.023	0.176	0.214	0.193	0.173	0.18
CPI-SC061137A41	COL4A6_a2b1 complex	simple:Q14031	complex:a2b1 complex	COL4A6		TRUE	FALSE	FALSE	curated	TRUE	0.005	0.043	0.021	0.002	0.008	0.025	0.063	0.042	0.023	0.029	0.007	0.044	0.023	0.004	0.01	0	0	0	0	0	0.011	0.049	0.028	0.008	0.015
CPI-SC08226CD3B	COL9A2_a2b1 complex	simple:Q14055	complex:a2b1 complex	COL9A2		TRUE	FALSE	FALSE	curated	TRUE	0.009	0.047	0.025	0.006	0.012	0.037	0.074	0.053	0.034	0.04	0.011	0.049	0.028	0.008	0.014	0.005	0.043	0.021	0.002	0.008	0.072	0.11	0.088	0.069	0.075
CPI-SC0ADD7BEF0	COL19A1_a2b1 complex	simple:Q14993	complex:a2b1 complex	COL19A1		TRUE	FALSE	FALSE	curated	TRUE	0.026	0.063	0.042	0.023	0.029	0.898	0.936	0.915	0.895	0.902	0.112	0.15	0.129	0.11	0.116	0.063	0.101	0.08	0.06	0.067	0.04	0.078	0.057	0.037	0.044
CPI-SC083EDDA21	COL28A1_a2b1 complex	simple:Q2UY09	complex:a2b1 complex	COL28A1		TRUE	FALSE	FALSE	curated	TRUE	0.004	0.042	0.021	0.001	0.008	0.012	0.05	0.029	0.009	0.015	0.009	0.047	0.025	0.006	0.012	0	0	0	0	0	0.009	0.047	0.025	0.006	0.012
CPI-SC0CCF30377	COL13A1_a2b1 complex	simple:Q5TAT6	complex:a2b1 complex	COL13A1		FALSE	FALSE	FALSE	curated	TRUE	0.004	0.042	0.021	0.001	0.007	0.015	0.053	0.032	0.012	0.018	0.005	0.043	0.022	0.002	0.009	0	0	0	0	0	0.006	0.044	0.023	0.003	0.01
CPI-SC0CE6F5084	COL27A1_a2b1 complex	simple:Q8IZC6	complex:a2b1 complex	COL27A1		TRUE	FALSE	FALSE	curated	TRUE	0.006	0.044	0.023	0.003	0.01	0.022	0.06	0.039	0.019	0.025	0.06	0.097	0.076	0.057	0.063	0.335	0.373	0.352	0.332	0.338	0.232	0.27	0.249	0.229	0.235
CPI-SC0AD6D8724	COL26A1_a2b1 complex	simple:Q96A83	complex:a2b1 complex	COL26A1		TRUE	FALSE	FALSE	curated	TRUE	0.009	0.047	0.026	0.006	0.013	0.307	0.344	0.323	0.304	0.31	0.025	0.063	0.042	0.022	0.028	0.023	0.061	0.04	0.02	0.027	0.031	0.068	0.047	0.028	0.034
CPI-SC0F300DE24	COL12A1_a2b1 complex	simple:Q99715	complex:a2b1 complex	COL12A1		TRUE	FALSE	FALSE	curated	TRUE	0.006	0.044	0.023	0.003	0.01	0.07	0.108	0.087	0.067	0.073	0.032	0.07	0.049	0.029	0.035	0.015	0.053	0.032	0.012	0.018	0.011	0.049	0.028	0.008	0.015
CPI-SC00064A9CE	COL20A1_a2b1 complex	simple:Q9P218	complex:a2b1 complex	COL20A1		TRUE	FALSE	FALSE	curated	TRUE	0.01	0.047	0.026	0.007	0.013	0.031	0.069	0.048	0.028	0.035	0.016	0.054	0.032	0.013	0.019	0.008	0.045	0.024	0.005	0.011	0.04	0.078	0.057	0.037	0.044
CPI-SC06873D10F	COL17A1_a2b1 complex	simple:Q9UMD9	complex:a2b1 complex	COL17A1		TRUE	FALSE	FALSE	curated	TRUE	0.005	0.042	0.021	0.002	0.008	0.008	0.046	0.025	0.005	0.012	0.005	0.042	0.021	0.002	0.008	0	0	0	0	0	0	0	0	0	0
CPI-SC0E3784FFB	LAMC1_a2b1 complex	simple:P11047	complex:a2b1 complex	LAMC1		TRUE	FALSE	FALSE	curated	TRUE	0.164	0.202	0.181	0.161	0.168	0.43	0.468	0.447	0.427	0.434	0.143	0.181	0.159	0.14	0.146	0.057	0.095	0.073	0.054	0.06	0.441	0.479	0.457	0.438	0.444
CPI-SC0D9B795CC	CDH1_a2b1 complex	simple:P12830	complex:a2b1 complex	CDH1		FALSE	FALSE	FALSE	curated	TRUE	0.004	0.042	0.021	0.001	0.008	0.005	0.043	0.022	0.002	0.008	0	0	0	0	0	0	0	0	0	0	0	0	0	0	0
CPI-SC08B6B74FB	FN1_a2Bb3 complex	simple:P02751	complex:a2Bb3 complex	FN1		TRUE	FALSE	FALSE	curated	TRUE	0.005	0.016	0.002	0.001	0.003	0.014	0.025	0.011	0.011	0.012	0.006	0.017	0.003	0.002	0.004	0	0	0	0	0	0.012	0.023	0.009	0.008	0.01
CPI-SC0BAB29E69	F2_a2Bb3 complex	simple:P00734	complex:a2Bb3 complex	F2		TRUE	FALSE	FALSE	curated	TRUE	0.004	0.016	0.002	0.001	0.003	0.007	0.018	0.004	0.003	0.005	0	0	0	0	0	0	0	0	0	0	0.007	0.018	0.004	0.003	0.005
CPI-SC08067D831	VTN_a2Bb3 complex	simple:P04004	complex:a2Bb3 complex	VTN		TRUE	FALSE	FALSE	curated	TRUE	0.006	0.017	0.003	0.002	0.004	0.02	0.031	0.017	0.017	0.018	0.006	0.018	0.004	0.003	0.005	0.006	0.017	0.003	0.003	0.004	0	0	0	0	0
CPI-SC0200AC9E3	THBS1_a2Bb3 complex	simple:P07996	complex:a2Bb3 complex	THBS1		FALSE	FALSE	FALSE	curated	TRUE	0.005	0.016	0.002	0.002	0.003	0.013	0.024	0.01	0.009	0.011	0	0	0	0	0	0.006	0.017	0.003	0.003	0.004	0	0	0	0	0
CPI-SC090855C8E	FN1_aVb3 complex	simple:P02751	complex:aVb3 complex	FN1		TRUE	FALSE	FALSE	curated	TRUE	0.018	0.024	0.01	0.049	0.005	0.027	0.033	0.02	0.058	0.015	0.019	0.025	0.011	0.05	0.006	0	0	0	0	0	0.025	0.031	0.017	0.056	0.012
CPI-SC0B9199C7F	LAMC1_aVb3 complex	simple:P11047	complex:aVb3 complex	LAMC1		TRUE	FALSE	FALSE	curated	TRUE	0.178	0.184	0.17	0.209	0.165	0.444	0.45	0.436	0.475	0.431	0.156	0.162	0.149	0.187	0.144	0.07	0.076	0.063	0.101	0.058	0.454	0.46	0.447	0.485	0.442
CPI-SC0EC380922	F2_aVb3 complex	simple:P00734	complex:aVb3 complex	F2		TRUE	FALSE	FALSE	curated	TRUE	0.018	0.024	0.01	0.048	0.005	0.02	0.026	0.012	0.051	0.007	0	0	0	0	0	0	0	0	0	0	0.02	0.026	0.012	0.051	0.007
CPI-SC0530C27A8	VTN_aVb3 complex	simple:P04004	complex:aVb3 complex	VTN		TRUE	FALSE	FALSE	curated	TRUE	0.019	0.025	0.011	0.049	0.006	0.033	0.039	0.026	0.064	0.021	0.02	0.026	0.012	0.05	0.007	0.019	0.025	0.012	0.05	0.007	0	0	0	0	0
CPI-SC0755598EE	THBS1_aVb3 complex	simple:P07996	complex:aVb3 complex	THBS1		FALSE	FALSE	FALSE	curated	TRUE	0.018	0.024	0.011	0.049	0.006	0.026	0.032	0.018	0.057	0.013	0	0	0	0	0	0.019	0.025	0.012	0.05	0.007	0	0	0	0	0
CPI-SC044E3F9B6	FGF2_aVb3 complex	simple:P09038	complex:aVb3 complex	FGF2		TRUE	FALSE	FALSE	curated	TRUE	0.023	0.029	0.015	0.053	0.01	0.067	0.073	0.059	0.098	0.054	0.089	0.095	0.082	0.12	0.077	0.041	0.047	0.033	0.071	0.028	0.035	0.04	0.027	0.065	0.022
CPI-SC0988E0218	SPP1_aVb3 complex	simple:P10451	complex:aVb3 complex	SPP1		TRUE	FALSE	FALSE	curated	TRUE	0.042	0.048	0.034	0.073	0.029	0.209	0.215	0.202	0.24	0.197	0.055	0.061	0.047	0.086	0.042	0.042	0.048	0.034	0.072	0.029	0.039	0.045	0.032	0.07	0.027
CPI-SC0E2D0DC4B	FGF1_aVb3 complex	simple:P05230	complex:aVb3 complex	FGF1		TRUE	FALSE	FALSE	curated	TRUE	0.26	0.266	0.252	0.291	0.247	1.113	1.119	1.105	1.143	1.1	0.794	0.8	0.786	0.825	0.781	0.119	0.125	0.111	0.149	0.106	0.241	0.247	0.233	0.272	0.228
CPI-SC00756BB93	THY1_aVb3 complex	simple:P04216	complex:aVb3 complex	THY1		FALSE	FALSE	FALSE	curated	TRUE	0.093	0.099	0.085	0.123	0.08	0.828	0.834	0.82	0.859	0.815	0.14	0.145	0.132	0.17	0.127	0.12	0.125	0.112	0.15	0.107	0.102	0.108	0.095	0.133	0.09
CPI-SC0E1037D03	VWF_aVb3 complex	simple:P04275	complex:aVb3 complex	VWF		TRUE	FALSE	FALSE	curated	TRUE	0.021	0.027	0.013	0.051	0.008	0.032	0.038	0.024	0.063	0.019	0.022	0.028	0.015	0.053	0.01	0.026	0.032	0.018	0.057	0.013	0.035	0.04	0.027	0.065	0.022
CPI-SC05A209BEC	FCER2_aVb3 complex	simple:P06734	complex:aVb3 complex	FCER2		TRUE	TRUE	FALSE	curated	TRUE	0.02	0.026	0.012	0.051	0.007	0.044	0.049	0.036	0.074	0.031	0.02	0.026	0.013	0.051	0.008	0.019	0.025	0.012	0.05	0.007	0	0	0	0	0
CPI-SC02E74AFA5	MMP2_aVb3 complex	simple:P08253	complex:aVb3 complex	MMP2		TRUE	FALSE	FALSE	curated	TRUE	0.021	0.027	0.013	0.052	0.008	0.022	0.028	0.014	0.052	0.009	0.02	0.026	0.012	0.05	0.007	0.029	0.035	0.021	0.059	0.016	0.081	0.087	0.073	0.111	0.068
CPI-SC0A58E6695	TNC_aVb3 complex	simple:P24821	complex:aVb3 complex	TNC		TRUE	FALSE	FALSE	curated	TRUE	0.019	0.024	0.011	0.049	0.006	0.03	0.036	0.022	0.061	0.017	0.023	0.029	0.016	0.054	0.01	0	0	0	0	0	0.105	0.111	0.097	0.136	0.092
CPI-SC06525B099	L1CAM_aVb3 complex	simple:P32004	complex:aVb3 complex	L1CAM		FALSE	FALSE	FALSE	curated	TRUE	0.026	0.032	0.018	0.056	0.013	0.223	0.229	0.216	0.254	0.211	0.037	0.042	0.029	0.067	0.024	0.035	0.041	0.027	0.066	0.022	0.088	0.094	0.08	0.119	0.075
CPI-SC095A2C115	PLAUR_aVb3 complex	simple:Q03405	complex:aVb3 complex	PLAUR		TRUE	TRUE	FALSE	curated	TRUE	0.018	0.024	0.01	0.049	0.005	0.02	0.025	0.012	0.05	0.007	0.018	0.024	0.011	0.049	0.006	0.024	0.03	0.016	0.055	0.011	0	0	0	0	0
CPI-SC0EFCE145F	OMD_aVb3 complex	simple:Q99983	complex:aVb3 complex	OMD		TRUE	FALSE	FALSE	curated	TRUE	0.021	0.027	0.013	0.052	0.008	0.029	0.035	0.021	0.059	0.016	0.019	0.025	0.011	0.05	0.006	0.019	0.025	0.012	0.05	0.007	0.022	0.028	0.015	0.053	0.01
CPI-SC04F2478E9	FN1_a3b1 complex	simple:P02751	complex:a3b1 complex	FN1		TRUE	FALSE	FALSE	curated	TRUE	0.011	0.21	0.022	0.013	0.032	0.02	0.22	0.032	0.023	0.041	0.012	0.211	0.023	0.014	0.033	0	0	0	0	0	0.018	0.217	0.029	0.02	0.039
CPI-SC02BFEEC8A	THBS1_a3b1 complex	simple:P07996	complex:a3b1 complex	THBS1		FALSE	FALSE	FALSE	curated	TRUE	0.011	0.211	0.023	0.014	0.032	0.019	0.218	0.03	0.021	0.04	0	0	0	0	0	0.012	0.212	0.024	0.015	0.033	0	0	0	0	0
CPI-SC0ED0520DD	LAMA3_a3b1 complex	simple:Q16787	complex:a3b1 complex	LAMA3		TRUE	FALSE	FALSE	curated	TRUE	0.014	0.213	0.025	0.016	0.035	0.077	0.277	0.089	0.08	0.098	0.016	0.215	0.027	0.018	0.036	0.017	0.217	0.028	0.019	0.038	0.015	0.215	0.027	0.018	0.036
CPI-SC09938698A	CSPG4_a3b1 complex	simple:Q6UVK1	complex:a3b1 complex	CSPG4		FALSE	FALSE	FALSE	curated	TRUE	0.03	0.229	0.041	0.032	0.051	0.021	0.221	0.032	0.023	0.042	0.02	0.22	0.032	0.023	0.041	0.013	0.213	0.025	0.016	0.034	0.846	1.045	0.857	0.848	0.867
CPI-SC06364D669	FN1_a4b1 complex	simple:P02751	complex:a4b1 complex	FN1		TRUE	FALSE	FALSE	curated	TRUE	0.046	0.079	0.019	0.032	0.03	0.055	0.088	0.028	0.041	0.039	0.047	0.08	0.02	0.033	0.031	0	0	0	0	0	0.052	0.085	0.026	0.039	0.036
CPI-SC07BE7830D	SPP1_a4b1 complex	simple:P10451	complex:a4b1 complex	SPP1		TRUE	FALSE	FALSE	curated	TRUE	0.07	0.103	0.043	0.056	0.054	0.237	0.27	0.21	0.223	0.221	0.083	0.116	0.056	0.069	0.067	0.069	0.102	0.042	0.056	0.053	0.067	0.1	0.04	0.053	0.051
CPI-SC0BC542ACC	TNC_a4b1 complex	simple:P24821	complex:a4b1 complex	TNC		TRUE	FALSE	FALSE	curated	TRUE	0.046	0.079	0.019	0.033	0.03	0.058	0.091	0.031	0.044	0.041	0.051	0.084	0.024	0.037	0.035	0	0	0	0	0	0.133	0.166	0.106	0.119	0.117
CPI-SC0E9C058EB	PLAUR_a4b1 complex	simple:Q03405	complex:a4b1 complex	PLAUR		TRUE	TRUE	FALSE	curated	TRUE	0.045	0.078	0.019	0.032	0.029	0.047	0.08	0.02	0.034	0.031	0.046	0.079	0.019	0.032	0.03	0.052	0.085	0.025	0.038	0.036	0	0	0	0	0
CPI-SC0A9EB628A	VCAM1_a4b1 complex	simple:P19320	complex:a4b1 complex	VCAM1		FALSE	FALSE	FALSE	curated	TRUE	0.046	0.079	0.019	0.033	0.03	0.048	0.081	0.021	0.035	0.032	0.102	0.135	0.075	0.089	0.086	0.054	0.087	0.028	0.041	0.038	0	0	0	0	0
CPI-SC070D5A96F	JAM2_a4b1 complex	simple:P57087	complex:a4b1 complex	JAM2		FALSE	FALSE	FALSE	curated	TRUE	0.055	0.088	0.028	0.041	0.039	0.086	0.119	0.06	0.073	0.07	0.562	0.595	0.535	0.548	0.546	0.135	0.168	0.108	0.122	0.119	0.402	0.435	0.375	0.388	0.386
CPI-SC0B4D7E0FF	FN1_a4b7 complex	simple:P02751	complex:a4b7 complex	FN1		TRUE	FALSE	FALSE	curated	TRUE	0.001	0.006	0.004	0.008	0.003	0.011	0.016	0.013	0.017	0.012	0.002	0.007	0.005	0.009	0.004	0	0	0	0	0	0.008	0.013	0.011	0.015	0.01
CPI-SC08E97F7CA	VCAM1_a4b7 complex	simple:P19320	complex:a4b7 complex	VCAM1		FALSE	FALSE	FALSE	curated	TRUE	0.002	0.007	0.005	0.009	0.004	0.004	0.009	0.007	0.011	0.006	0.058	0.063	0.061	0.065	0.06	0.01	0.015	0.013	0.017	0.012	0	0	0	0	0
CPI-SC092C3E4DF	FN1_a8b1 complex	simple:P02751	complex:a8b1 complex	FN1		TRUE	FALSE	FALSE	curated	TRUE	0.006	0.092	0.016	0.007	0.03	0.015	0.101	0.025	0.016	0.039	0.007	0.093	0.017	0.008	0.031	0	0	0	0	0	0.013	0.099	0.023	0.014	0.036
CPI-SC01195CB48	TNC_a8b1 complex	simple:P24821	complex:a8b1 complex	TNC		TRUE	FALSE	FALSE	curated	TRUE	0.007	0.092	0.017	0.008	0.03	0.018	0.104	0.028	0.019	0.041	0.011	0.097	0.021	0.012	0.035	0	0	0	0	0	0.093	0.179	0.103	0.094	0.117
CPI-SC096929DB0	FN1_aVb1 complex	simple:P02751	complex:aVb1 complex	FN1		TRUE	FALSE	FALSE	curated	TRUE	0.094	0.186	0.194	0.234	0.284	0.103	0.195	0.204	0.243	0.294	0.095	0.187	0.195	0.235	0.285	0	0	0	0	0	0.1	0.193	0.201	0.241	0.291
CPI-SC067AD890A	VTN_aVb1 complex	simple:P04004	complex:aVb1 complex	VTN		TRUE	FALSE	FALSE	curated	TRUE	0.094	0.187	0.195	0.235	0.285	0.109	0.202	0.21	0.25	0.3	0.095	0.188	0.196	0.236	0.286	0.095	0.188	0.196	0.236	0.286	0	0	0	0	0
CPI-SC0847A64D2	FN1_aVb5 complex	simple:P02751	complex:aVb5 complex	FN1		TRUE	FALSE	FALSE	curated	TRUE	0.096	0.048	0.271	0.305	0.034	0.106	0.058	0.28	0.314	0.044	0.097	0.049	0.272	0.306	0.035	0	0	0	0	0	0.103	0.055	0.278	0.312	0.041
CPI-SC0EEF3A379	LAMC1_a6b1 complex	simple:P11047	complex:a6b1 complex	LAMC1		TRUE	FALSE	FALSE	curated	TRUE	0.172	0.262	0.354	0.394	0.182	0.438	0.528	0.62	0.66	0.448	0.151	0.241	0.333	0.373	0.161	0.065	0.155	0.247	0.287	0.075	0.449	0.539	0.631	0.671	0.459
CPI-SS0CC5DCE80	CDH1_KLRG1	simple:P12830	simple:Q96E93	CDH1	KLRG1	FALSE	FALSE	TRUE	curated	FALSE	0	0.001	0	0	0.003	0	0.002	0	0	0.004	0	0	0	0	0	0	0	0	0	0	0	0	0	0	0
CPI-SC007890A1C	CDH1_aEb7 complex	simple:P12830	complex:aEb7 complex	CDH1		FALSE	FALSE	FALSE	curated	TRUE	0.001	0.006	0.004	0.008	0.003	0.002	0.007	0.005	0.009	0.004	0	0	0	0	0	0	0	0	0	0	0	0	0	0	0
CPI-SS03DA2A820	FGF2_CD44	simple:P09038	simple:P16070	FGF2	CD44	TRUE	FALSE	TRUE	I2D,InnateDB-All	FALSE	0.011	0.017	0.019	0.015	0.022	0.055	0.062	0.063	0.06	0.067	0.078	0.084	0.085	0.082	0.089	0.029	0.035	0.037	0.033	0.04	0.023	0.029	0.03	0.027	0.034
CPI-SS02AB0C3E0	SPP1_CD44	simple:P10451	simple:P16070	SPP1	CD44	TRUE	FALSE	TRUE	I2D,IMEx,InnateDB-All,IntAct	FALSE	0.03	0.037	0.038	0.035	0.042	0.198	0.204	0.205	0.202	0.209	0.043	0.049	0.051	0.048	0.054	0.03	0.036	0.038	0.034	0.041	0.028	0.034	0.035	0.032	0.039
CPI-SS03722104E	HGF_CD44	simple:P14210	simple:P16070	HGF	CD44	TRUE	FALSE	TRUE	IMEx,InnateDB-All,IntAct	FALSE	0.007	0.013	0.014	0.011	0.018	0.026	0.032	0.033	0.03	0.037	0.006	0.013	0.014	0.011	0.018	0.023	0.03	0.031	0.028	0.035	0.008	0.014	0.016	0.013	0.019
CPI-SS008FB916C	FGF2_FGFR4	simple:P09038	simple:P22455	FGF2	FGFR4	TRUE	FALSE	TRUE	curated	FALSE	0.007	0.007	0	0	0	0.052	0.051	0	0	0	0.074	0.073	0	0	0	0.025	0.025	0	0	0	0.019	0.018	0	0	0
CPI-SS0D9366D11	FGF1_FGFR4	simple:P05230	simple:P22455	FGF1	FGFR4	TRUE	FALSE	TRUE	I2D,IMEx,InnateDB-All,IntAct	FALSE	0.245	0.244	0	0	0	1.097	1.097	0	0	0	0.779	0.778	0	0	0	0.103	0.103	0	0	0	0.225	0.225	0	0	0
CPI-SS0AC594A8E	FGF17_FGFR4	simple:O60258	simple:P22455	FGF17	FGFR4	TRUE	FALSE	TRUE	I2D	FALSE	0.003	0.002	0	0	0	0.005	0.005	0	0	0	0.003	0.002	0	0	0	0	0	0	0	0	0.007	0.006	0	0	0
CPI-SS0D4CA5D92	FGF18_FGFR4	simple:O76093	simple:P22455	FGF18	FGFR4	TRUE	FALSE	TRUE	I2D	FALSE	0.004	0.003	0	0	0	0.056	0.055	0	0	0	0.007	0.006	0	0	0	0.006	0.005	0	0	0	0.007	0.006	0	0	0
CPI-SS05ECF1933	FGF3_FGFR4	simple:P11487	simple:P22455	FGF3	FGFR4	TRUE	FALSE	TRUE	I2D	FALSE	0.003	0.002	0	0	0	0.016	0.015	0	0	0	0.004	0.003	0	0	0	0.004	0.003	0	0	0	0	0	0	0	0
CPI-SS066347638	FGF5_FGFR4	simple:P12034	simple:P22455	FGF5	FGFR4	TRUE	FALSE	TRUE	I2D,IMEx,InnateDB-All,IntAct	FALSE	0.004	0.003	0	0	0	0.031	0.03	0	0	0	0.005	0.004	0	0	0	0	0	0	0	0	0.012	0.011	0	0	0
CPI-SS0D95D41D6	FGF7_FGFR4	simple:P21781	simple:P22455	FGF7	FGFR4	TRUE	FALSE	TRUE	I2D	FALSE	0.005	0.005	0	0	0	0.016	0.015	0	0	0	0.021	0.02	0	0	0	0.004	0.003	0	0	0	0	0	0	0	0
CPI-SS01F67987A	FGF2_FGFR1	simple:P09038	simple:P11362	FGF2	FGFR1	TRUE	FALSE	TRUE	curated	FALSE	0.054	0.606	0.222	0.053	0.107	0.098	0.65	0.267	0.098	0.152	0.12	0.673	0.289	0.12	0.174	0.072	0.624	0.24	0.071	0.125	0.065	0.618	0.234	0.065	0.119
CPI-SS0755A26DD	FGF1_FGFR1	simple:P05230	simple:P11362	FGF1	FGFR1	TRUE	FALSE	TRUE	curated	FALSE	0.291	0.843	0.46	0.291	0.345	1.144	1.696	1.312	1.143	1.197	0.825	1.377	0.994	0.825	0.878	0.15	0.702	0.318	0.149	0.203	0.272	0.824	0.441	0.272	0.325
CPI-SS0467AFD8A	FGF17_FGFR1	simple:O60258	simple:P11362	FGF17	FGFR1	TRUE	FALSE	TRUE	I2D,InnateDB-All	FALSE	0.049	0.601	0.218	0.049	0.102	0.052	0.604	0.22	0.051	0.105	0.049	0.601	0.218	0.049	0.103	0	0	0	0	0	0.053	0.605	0.222	0.053	0.107
CPI-SS0F2C6A4D4	FGF18_FGFR1	simple:O76093	simple:P11362	FGF18	FGFR1	TRUE	FALSE	TRUE	I2D	FALSE	0.05	0.602	0.219	0.05	0.104	0.102	0.654	0.271	0.102	0.156	0.053	0.606	0.222	0.053	0.107	0.052	0.604	0.221	0.052	0.106	0.053	0.605	0.222	0.053	0.107
CPI-SS03189F5F6	FGF10_FGFR1	simple:O15520	simple:P11362	FGF10	FGFR1	TRUE	FALSE	TRUE	InnateDB-All	FALSE	0.057	0.609	0.226	0.057	0.11	0.306	0.858	0.475	0.306	0.36	0.096	0.648	0.264	0.095	0.149	0.065	0.617	0.234	0.065	0.119	0.053	0.605	0.222	0.053	0.107
CPI-SS05A94DE17	FGF2_FGFR2	simple:P09038	simple:P21802	FGF2	FGFR2	TRUE	FALSE	TRUE	curated	FALSE	2.1	3.527	2.327	0.625	1.243	2.144	3.571	2.371	0.669	1.287	2.166	3.594	2.394	0.692	1.31	2.118	3.545	2.345	0.643	1.261	2.111	3.539	2.339	0.637	1.255
CPI-SS04A97448D	FGF1_FGFR2	simple:P05230	simple:P21802	FGF1	FGFR2	TRUE	FALSE	TRUE	I2D,IMEx,InnateDB-All,IntAct,MINT	FALSE	2.337	3.764	2.564	0.862	1.48	3.19	4.617	3.417	1.715	2.333	2.871	4.298	3.098	1.396	2.014	2.195	3.623	2.423	0.721	1.339	2.318	3.745	2.545	0.843	1.461
CPI-SS06B86672A	CD44_FGFR2	simple:P16070	simple:P21802	CD44	FGFR2	TRUE	TRUE	TRUE	InnateDB-All	FALSE	2.1	3.527	2.327	0.625	1.244	2.106	3.534	2.334	0.632	1.25	2.108	3.535	2.335	0.633	1.251	2.105	3.532	2.332	0.63	1.248	2.111	3.539	2.339	0.637	1.255
CPI-SS0330D939A	FGF17_FGFR2	simple:O60258	simple:P21802	FGF17	FGFR2	TRUE	FALSE	TRUE	I2D,InnateDB-All	FALSE	2.095	3.522	2.322	0.62	1.238	2.098	3.525	2.325	0.623	1.241	2.095	3.522	2.322	0.62	1.239	0	0	0	0	0	2.099	3.526	2.326	0.625	1.243
CPI-SS0F6A7A4DF	FGF18_FGFR2	simple:O76093	simple:P21802	FGF18	FGFR2	TRUE	FALSE	TRUE	I2D	FALSE	2.096	3.523	2.323	0.621	1.239	2.148	3.575	2.375	0.673	1.292	2.099	3.527	2.327	0.625	1.243	2.098	3.525	2.325	0.623	1.242	2.099	3.526	2.326	0.625	1.243
CPI-SS06D341996	FGF3_FGFR2	simple:P11487	simple:P21802	FGF3	FGFR2	TRUE	FALSE	TRUE	I2D,InnateDB-All	FALSE	2.095	3.522	2.322	0.621	1.239	2.108	3.536	2.336	0.634	1.252	2.096	3.523	2.323	0.621	1.239	2.096	3.523	2.323	0.622	1.24	0	0	0	0	0
CPI-SS02FEAF02E	FGF5_FGFR2	simple:P12034	simple:P21802	FGF5	FGFR2	TRUE	FALSE	TRUE	I2D,IMEx,InnateDB-All,IntAct	FALSE	2.096	3.523	2.323	0.621	1.239	2.123	3.55	2.35	0.648	1.267	2.097	3.524	2.324	0.622	1.241	0	0	0	0	0	2.104	3.531	2.331	0.629	1.248
CPI-SS0E928B8C8	FGF7_FGFR2	simple:P21781	simple:P21802	FGF7	FGFR2	TRUE	FALSE	TRUE	I2D,IMEx,InnateDB-All,IntAct	FALSE	2.097	3.525	2.325	0.623	1.241	2.108	3.535	2.335	0.634	1.252	2.113	3.541	2.341	0.639	1.257	2.096	3.523	2.323	0.622	1.24	0	0	0	0	0
CPI-SS0AECC113F	FGF10_FGFR2	simple:O15520	simple:P21802	FGF10	FGFR2	TRUE	FALSE	TRUE	I2D,IMEx,InnateDB-All,IntAct	FALSE	2.103	3.53	2.33	0.628	1.246	2.352	3.779	2.579	0.877	1.496	2.142	3.569	2.369	0.667	1.285	2.111	3.538	2.338	0.636	1.255	2.099	3.526	2.326	0.625	1.243
CPI-SS0735F5C3A	TIMP1_FGFR2	simple:P01033	simple:P21802	TIMP1	FGFR2	TRUE	FALSE	TRUE	InnateDB-All	FALSE	2.095	3.522	2.322	0.62	1.238	2.108	3.535	2.335	0.633	1.251	2.097	3.524	2.324	0.622	1.241	0	0	0	0	0	2.099	3.526	2.326	0.625	1.243
CPI-SS0DC322B61	ROS1_FGFR2	simple:P08922	simple:P21802	ROS1	FGFR2	TRUE	TRUE	TRUE	I2D	FALSE	2.096	3.523	2.323	0.622	1.24	2.1	3.527	2.327	0.626	1.244	2.096	3.524	2.324	0.622	1.24	2.097	3.524	2.324	0.622	1.241	0	0	0	0	0
CPI-SS0348DB5E3	FGFR1_FGFR2	simple:P11362	simple:P21802	FGFR1	FGFR2	TRUE	TRUE	TRUE	InnateDB-All	FALSE	2.143	3.57	2.37	0.668	1.286	2.695	4.122	2.922	1.22	1.838	2.312	3.739	2.539	0.837	1.455	2.143	3.57	2.37	0.668	1.286	2.196	3.624	2.424	0.722	1.34
CPI-SS0D636A374	FGF2_FGFR3	simple:P09038	simple:P22607	FGF2	FGFR3	TRUE	FALSE	TRUE	curated	FALSE	0.012	0.02	1.03	0.009	0.08	0.056	0.064	1.074	0.053	0.125	0.078	0.087	1.097	0.076	0.147	0.03	0.038	1.048	0.027	0.098	0.023	0.032	1.042	0.021	0.092
CPI-SS015819E65	FGF1_FGFR3	simple:P05230	simple:P22607	FGF1	FGFR3	TRUE	FALSE	TRUE	I2D,IMEx,InnateDB-All,IntAct	FALSE	0.249	0.257	1.267	0.246	0.318	1.102	1.11	2.12	1.099	1.17	0.783	0.791	1.801	0.78	0.852	0.107	0.116	1.126	0.105	0.176	0.23	0.238	1.248	0.227	0.299
CPI-SS0BC9F7E9E	FGF17_FGFR3	simple:O60258	simple:P22607	FGF17	FGFR3	TRUE	FALSE	TRUE	I2D	FALSE	0.007	0.015	1.025	0.004	0.076	0.01	0.018	1.028	0.007	0.078	0.007	0.015	1.025	0.004	0.076	0	0	0	0	0	0.011	0.02	1.03	0.009	0.08
CPI-SS0E134097C	FGF18_FGFR3	simple:O76093	simple:P22607	FGF18	FGFR3	TRUE	FALSE	TRUE	I2D	FALSE	0.008	0.016	1.026	0.005	0.077	0.06	0.068	1.078	0.057	0.129	0.011	0.02	1.03	0.009	0.08	0.01	0.018	1.028	0.007	0.079	0.011	0.02	1.03	0.009	0.08
CPI-SS0C2A73A10	FGF3_FGFR3	simple:P11487	simple:P22607	FGF3	FGFR3	TRUE	FALSE	TRUE	I2D	FALSE	0.007	0.016	1.026	0.005	0.076	0.02	0.029	1.039	0.018	0.089	0.008	0.016	1.026	0.005	0.077	0.008	0.017	1.027	0.006	0.077	0	0	0	0	0
CPI-SS076D8A297	FGF5_FGFR3	simple:P12034	simple:P22607	FGF5	FGFR3	TRUE	FALSE	TRUE	I2D	FALSE	0.008	0.016	1.026	0.005	0.077	0.035	0.043	1.053	0.032	0.104	0.009	0.018	1.028	0.007	0.078	0	0	0	0	0	0.016	0.024	1.034	0.013	0.085
CPI-SS00E68BB92	FGF7_FGFR3	simple:P21781	simple:P22607	FGF7	FGFR3	TRUE	FALSE	TRUE	I2D	FALSE	0.009	0.018	1.028	0.007	0.078	0.02	0.029	1.039	0.018	0.089	0.025	0.034	1.044	0.023	0.094	0.008	0.017	1.027	0.006	0.077	0	0	0	0	0
CPI-SS0BF3ED143	FGFR2_FGFR3	simple:P21802	simple:P22607	FGFR2	FGFR3	TRUE	TRUE	TRUE	IMEx,InnateDB-All	FALSE	2.101	2.109	3.119	2.098	2.17	3.528	3.536	4.546	3.525	3.597	2.328	2.336	3.346	2.325	2.397	0.626	0.634	1.644	0.623	0.695	1.244	1.253	2.263	1.242	1.313
CPI-SS0CB6968B9	FGF2_FGFRL1	simple:P09038	simple:Q8N441	FGF2	FGFRL1	TRUE	FALSE	TRUE	I2D	FALSE	0.024	0.016	0.046	0.008	0.042	0.068	0.06	0.09	0.052	0.086	0.091	0.083	0.113	0.075	0.108	0.042	0.034	0.064	0.026	0.06	0.036	0.028	0.058	0.02	0.053
CPI-SS0C1BD22BC	SPP1_PTGER4	simple:P10451	simple:P35408	SPP1	PTGER4	TRUE	FALSE	TRUE	IMEx,MINT	FALSE	0.051	0.234	0.078	0.042	0.054	0.218	0.401	0.245	0.209	0.221	0.064	0.247	0.091	0.055	0.067	0.051	0.233	0.078	0.042	0.053	0.048	0.231	0.075	0.039	0.051
CPI-SC01AB9BED7	SPP1_a9b1 complex	simple:P10451	complex:a9b1 complex	SPP1		TRUE	FALSE	FALSE	curated	TRUE	0.037	0.224	0.063	0.258	0.309	0.204	0.391	0.231	0.426	0.476	0.05	0.236	0.076	0.271	0.321	0.037	0.223	0.063	0.258	0.308	0.034	0.221	0.061	0.256	0.306
CPI-SC056BF6CBB	TNC_a9b1 complex	simple:P24821	complex:a9b1 complex	TNC		TRUE	FALSE	FALSE	curated	TRUE	0.014	0.2	0.04	0.235	0.285	0.025	0.211	0.051	0.246	0.296	0.018	0.205	0.044	0.239	0.29	0	0	0	0	0	0.1	0.286	0.126	0.321	0.371
CPI-SC062D34C2A	VCAM1_a9b1 complex	simple:P19320	complex:a9b1 complex	VCAM1		FALSE	FALSE	FALSE	curated	TRUE	0.014	0.2	0.04	0.235	0.285	0.016	0.202	0.042	0.237	0.287	0.07	0.256	0.096	0.291	0.341	0.022	0.208	0.048	0.243	0.293	0	0	0	0	0
CPI-SS068C742A1	FGF1_TGFBR3	simple:P05230	simple:Q03167	FGF1	TGFBR3	TRUE	FALSE	TRUE	InnateDB-All	FALSE	0.285	0.806	0.365	0.274	0.364	1.138	1.659	1.218	1.127	1.217	0.819	1.34	0.899	0.808	0.898	0.143	0.665	0.224	0.133	0.222	0.266	0.787	0.346	0.255	0.345
CPI-SS085EE60B1	TGFB1_TGFBR3	simple:P01137	simple:Q03167	TGFB1	TGFBR3	TRUE	FALSE	TRUE	curated	FALSE	0.043	0.565	0.124	0.033	0.122	0.051	0.572	0.132	0.04	0.13	0.048	0.569	0.128	0.037	0.127	0.249	0.77	0.33	0.238	0.328	0	0	0	0	0
CPI-SS0FB37E079	INHA_TGFBR3	simple:P05111	simple:Q03167	INHA	TGFBR3	TRUE	FALSE	TRUE	I2D	FALSE	0.049	0.57	0.129	0.038	0.128	0.2	0.721	0.28	0.189	0.279	0.061	0.583	0.142	0.051	0.14	0.052	0.573	0.132	0.041	0.131	0.062	0.583	0.142	0.051	0.141
CPI-SS0D46E2B45	TGFB3_TGFBR3	simple:P10600	simple:Q03167	TGFB3	TGFBR3	TRUE	FALSE	TRUE	curated	FALSE	0.107	0.629	0.188	0.097	0.187	0.083	0.604	0.163	0.072	0.162	0.066	0.587	0.146	0.055	0.145	0.052	0.573	0.132	0.041	0.131	0.086	0.607	0.166	0.075	0.165
CPI-SS0178F5C45	TGFB2_TGFBR3	simple:P61812	simple:Q03167	TGFB2	TGFBR3	TRUE	FALSE	TRUE	curated	FALSE	0.048	0.569	0.128	0.037	0.127	0.112	0.633	0.192	0.101	0.191	0.134	0.655	0.214	0.123	0.213	0.049	0.57	0.129	0.038	0.128	0.067	0.588	0.147	0.056	0.146
CPI-SC0C6B54D7A	THY1_aXb2 complex	simple:P04216	complex:aXb2 complex	THY1		FALSE	FALSE	FALSE	curated	TRUE	0	0.075	0	0.076	0	0	0.811	0	0.811	0	0	0.122	0	0.123	0	0	0.102	0	0.103	0	0	0.085	0	0.086	0
CPI-SC03446A95E	FCER2_aXb2 complex	simple:P06734	complex:aXb2 complex	FCER2		TRUE	TRUE	FALSE	curated	TRUE	0	0.003	0	0.003	0	0	0.026	0	0.027	0	0	0.003	0	0.004	0	0	0.002	0	0.003	0	0	0	0	0	0
CPI-SC0A9458008	ICAM1_aXb2 complex	simple:P05362	complex:aXb2 complex	ICAM1		FALSE	TRUE	FALSE	curated	TRUE	0	0.001	0	0.002	0	0	0.001	0	0.002	0	0	0.004	0	0.004	0	0	0.056	0	0.057	0	0	0.005	0	0.006	0
CPI-SS000568A0E	FCER2_CR2	simple:P06734	simple:P20023	FCER2	CR2	TRUE	TRUE	TRUE	curated	FALSE	0.023	0.062	0.051	0.009	0.036	0.046	0.086	0.075	0.033	0.06	0.023	0.062	0.051	0.009	0.037	0.022	0.061	0.051	0.008	0.036	0	0	0	0	0
CPI-SC04AED00CE	TNC_aVb6 complex	simple:P24821	complex:aVb6 complex	TNC		TRUE	FALSE	FALSE	curated	TRUE	0.004	0.021	0.004	0.004	0.006	0.015	0.033	0.015	0.015	0.017	0.009	0.026	0.008	0.008	0.01	0	0	0	0	0	0.091	0.108	0.09	0.09	0.092
CPI-SC0E60FEE99	TGFB1_aVb6 complex	simple:P01137	complex:aVb6 complex	TGFB1		TRUE	FALSE	FALSE	curated	TRUE	0.004	0.021	0.004	0.004	0.006	0.012	0.029	0.012	0.012	0.014	0.009	0.026	0.008	0.008	0.01	0.21	0.227	0.21	0.21	0.212	0	0	0	0	0
CPI-SS0ACD487F0	L1CAM_L1CAM	simple:P32004	simple:P32004	L1CAM	L1CAM	FALSE	FALSE	FALSE	curated	FALSE	0.016	0.214	0.027	0.026	0.079	0.214	0.411	0.225	0.223	0.276	0.027	0.225	0.038	0.037	0.089	0.026	0.223	0.037	0.035	0.088	0.079	0.276	0.089	0.088	0.141
CPI-SC019DBDA78	VCAM1_aDb2 complex	simple:P19320	complex:aDb2 complex	VCAM1		FALSE	FALSE	FALSE	curated	TRUE	0.002	0.002	0	0.002	0	0.004	0.004	0	0.004	0	0.058	0.058	0	0.058	0	0.01	0.01	0	0.01	0	0	0	0	0	0
CPI-SS087B53ABF	JAM2_JAM3	simple:P57087	simple:Q9BX67	JAM2	JAM3	TRUE	FALSE	FALSE	curated	FALSE	0.476	0.272	0.134	0.087	0.395	0.508	0.304	0.166	0.119	0.427	0.983	0.78	0.642	0.595	0.903	0.557	0.353	0.215	0.168	0.476	0.823	0.62	0.482	0.435	0.743
CPI-SS0F9D53834	JAM3_JAM3	simple:Q9BX67	simple:Q9BX67	JAM3	JAM3	TRUE	FALSE	FALSE	curated	FALSE	0.933	0.73	0.591	0.544	0.852	0.73	0.526	0.388	0.341	0.649	0.591	0.388	0.25	0.203	0.511	0.544	0.341	0.203	0.156	0.464	0.852	0.649	0.511	0.464	0.772
CPI-SS055E061C9	LAMP1_FAM3C	simple:P11279	simple:Q92520	LAMP1	FAM3C	TRUE	TRUE	FALSE	InnateDB-All	FALSE	0.385	0.538	0.419	0.43	0.605	0.521	0.674	0.555	0.566	0.741	0.271	0.424	0.305	0.316	0.491	0.296	0.45	0.331	0.341	0.516	0.358	0.511	0.392	0.403	0.578
CPI-SS02904BE32	GLRA2_FAM3C	simple:P23416	simple:Q92520	GLRA2	FAM3C	TRUE	TRUE	FALSE	InnateDB-All	FALSE	0.032	0.185	0.066	0.077	0.252	0.283	0.436	0.317	0.328	0.503	0.038	0.191	0.072	0.083	0.258	0.047	0.2	0.081	0.092	0.267	0.032	0.186	0.067	0.077	0.252
CPI-SS033CB0BB2	CXADR_FAM3C	simple:P78310	simple:Q92520	CXADR	FAM3C	TRUE	TRUE	FALSE	IMEx,IntAct	FALSE	0.025	0.178	0.059	0.07	0.245	0.034	0.188	0.069	0.079	0.254	0.025	0.178	0.059	0.07	0.245	0.029	0.183	0.064	0.074	0.249	0.028	0.181	0.062	0.073	0.248
CPI-SS0E2431C09	PDCD1_FAM3C	simple:Q15116	simple:Q92520	PDCD1	FAM3C	TRUE	TRUE	FALSE	InnateDB-All	FALSE	0.023	0.176	0.057	0.068	0.243	0.024	0.177	0.058	0.069	0.244	0.023	0.177	0.058	0.068	0.243	0.029	0.183	0.064	0.074	0.249	0	0	0	0	0
CPI-SS016EE0084	PDCD1_CD274	simple:Q15116	simple:Q9NZQ7	PDCD1	CD274	FALSE	TRUE	TRUE	curated	FALSE	0.001	0.021	0.006	0.029	0.003	0.002	0.022	0.008	0.03	0.004	0.002	0.021	0.007	0.029	0.003	0.008	0.027	0.013	0.035	0.009	0	0	0	0	0
CPI-SS08F13AD5C	CD80_CD274	simple:P33681	simple:Q9NZQ7	CD80	CD274	FALSE	TRUE	TRUE	curated	FALSE	0.005	0.024	0.01	0.032	0.006	0.039	0.058	0.044	0.067	0.04	0.01	0.03	0.016	0.038	0.012	0.049	0.069	0.055	0.077	0.051	0.006	0.025	0.011	0.034	0.007
CPI-SS0F5B6B186	PDCD1_PDCD1LG2	simple:Q15116	simple:Q9BQ51	PDCD1	PDCD1LG2	TRUE	TRUE	TRUE	curated	FALSE	0	0.001	0	0	0.003	0.001	0.003	0	0	0.004	0.001	0.002	0	0	0.003	0.007	0.008	0	0	0.009	0	0	0	0	0
CPI-CS08CC8F9D3	ACVR1_BMPR2_BMP7	complex:ACVR1_BMPR2	simple:P18075		BMP7	TRUE	TRUE	FALSE	curated	FALSE	0.122	0.137	0.147	0.124	0.192	0.74	0.755	0.764	0.742	0.81	0.284	0.299	0.308	0.285	0.354	0.271	0.286	0.296	0.273	0.341	0.313	0.328	0.338	0.315	0.383
CPI-CS046B3C139	ACVR_1A2A receptor_BMP7	complex:ACVR_1A2A receptor	simple:P18075		BMP7	TRUE	TRUE	FALSE	curated	FALSE	0.071	0.086	0.095	0.073	0.141	0.512	0.527	0.537	0.514	0.582	0.155	0.17	0.18	0.157	0.226	0.146	0.161	0.17	0.147	0.216	0.185	0.2	0.209	0.186	0.255
CPI-CS0288D901D	ACVR_1A2B receptor_BMP7	complex:ACVR_1A2B receptor	simple:P18075		BMP7	TRUE	TRUE	FALSE	curated	FALSE	0.039	0.054	0.063	0.04	0.109	0.088	0.103	0.113	0.09	0.158	0.028	0.043	0.052	0.029	0.098	0.047	0.062	0.072	0.049	0.118	0.061	0.076	0.085	0.063	0.131
CPI-CS05EAF93CC	BMPR1A_BMPR2_BMP7	complex:BMPR1A_BMPR2	simple:P18075		BMP7	TRUE	TRUE	FALSE	curated	FALSE	0.166	0.181	0.19	0.168	0.236	0.493	0.508	0.517	0.494	0.563	0.509	0.524	0.534	0.511	0.58	0.167	0.182	0.192	0.169	0.237	0.357	0.372	0.381	0.359	0.427
CPI-CS08109C435	BMPR1B_BMPR2_BMP7	complex:BMPR1B_BMPR2	simple:P18075		BMP7	TRUE	TRUE	FALSE	curated	FALSE	0.015	0.03	0.04	0.017	0.085	0.286	0.301	0.31	0.288	0.356	0.53	0.545	0.555	0.532	0.601	0.059	0.075	0.084	0.061	0.13	0.024	0.039	0.049	0.026	0.095
CPI-CS0D35E69F6	BMR1A_ACR2A_BMP7	complex:BMR1A_ACR2A	simple:P18075		BMP7	TRUE	TRUE	FALSE	curated	FALSE	0.071	0.086	0.095	0.073	0.141	0.493	0.508	0.517	0.494	0.563	0.155	0.17	0.18	0.157	0.226	0.146	0.161	0.17	0.147	0.216	0.185	0.2	0.209	0.186	0.255
CPI-CS0C99F8D96	BMR1A_AVR2B_BMP7	complex:BMR1A_AVR2B	simple:P18075		BMP7	TRUE	TRUE	FALSE	curated	FALSE	0.039	0.054	0.063	0.04	0.109	0.088	0.103	0.113	0.09	0.158	0.028	0.043	0.052	0.029	0.098	0.047	0.062	0.072	0.049	0.118	0.061	0.076	0.085	0.063	0.131
CPI-CS0DF85303A	BMR1B_AVR2A_BMP7	complex:BMR1B_AVR2A	simple:P18075		BMP7	TRUE	TRUE	FALSE	curated	FALSE	0.015	0.03	0.04	0.017	0.085	0.286	0.301	0.31	0.288	0.356	0.155	0.17	0.18	0.157	0.226	0.059	0.075	0.084	0.061	0.13	0.024	0.039	0.049	0.026	0.095
CPI-CS08A853007	BMR1B_AVR2B_BMP7	complex:BMR1B_AVR2B	simple:P18075		BMP7	TRUE	TRUE	FALSE	curated	FALSE	0.015	0.03	0.04	0.017	0.085	0.088	0.103	0.113	0.09	0.158	0.028	0.043	0.052	0.029	0.098	0.047	0.062	0.072	0.049	0.118	0.024	0.039	0.049	0.026	0.095
CPI-CS0E1BF543E	ACVR1_BMPR2_BMP5	complex:ACVR1_BMPR2	simple:P22003		BMP5	TRUE	TRUE	FALSE	curated	FALSE	0.123	0.127	0.146	0	0.137	0.741	0.744	0.764	0	0.754	0.285	0.288	0.307	0	0.298	0.272	0.275	0.295	0	0.285	0.314	0.318	0.337	0	0.328
CPI-CS0EC80CA59	ACVR_1A2A receptor_BMP5	complex:ACVR_1A2A receptor	simple:P22003		BMP5	TRUE	TRUE	FALSE	curated	FALSE	0.072	0.075	0.095	0	0.085	0.513	0.516	0.536	0	0.526	0.156	0.16	0.179	0	0.17	0.147	0.15	0.17	0	0.16	0.186	0.189	0.208	0	0.199
CPI-CS0FCC00896	ACVR_1A2B receptor_BMP5	complex:ACVR_1A2B receptor	simple:P22003		BMP5	TRUE	TRUE	FALSE	curated	FALSE	0.04	0.043	0.062	0	0.053	0.089	0.093	0.112	0	0.103	0.029	0.032	0.051	0	0.042	0.049	0.052	0.071	0	0.062	0.062	0.065	0.085	0	0.075
CPI-CS046BCFC6F	BMPR1A_BMPR2_BMP5	complex:BMPR1A_BMPR2	simple:P22003		BMP5	TRUE	TRUE	FALSE	curated	FALSE	0.167	0.17	0.19	0	0.18	0.494	0.497	0.516	0	0.507	0.51	0.514	0.533	0	0.524	0.168	0.172	0.191	0	0.182	0.358	0.361	0.381	0	0.371
CPI-CS02C93975C	BMPR1B_BMPR2_BMP5	complex:BMPR1B_BMPR2	simple:P22003		BMP5	TRUE	TRUE	FALSE	curated	FALSE	0.016	0.019	0.039	0	0.029	0.287	0.29	0.31	0	0.3	0.532	0.535	0.554	0	0.545	0.061	0.064	0.083	0	0.074	0.026	0.029	0.048	0	0.039
CPI-CS047EE9E03	BMR1A_ACR2A_BMP5	complex:BMR1A_ACR2A	simple:P22003		BMP5	TRUE	TRUE	FALSE	curated	FALSE	0.072	0.075	0.095	0	0.085	0.494	0.497	0.516	0	0.507	0.156	0.16	0.179	0	0.17	0.147	0.15	0.17	0	0.16	0.186	0.189	0.208	0	0.199
CPI-CS0CA393CC5	BMR1A_AVR2B_BMP5	complex:BMR1A_AVR2B	simple:P22003		BMP5	TRUE	TRUE	FALSE	curated	FALSE	0.04	0.043	0.062	0	0.053	0.089	0.093	0.112	0	0.103	0.029	0.032	0.051	0	0.042	0.049	0.052	0.071	0	0.062	0.062	0.065	0.085	0	0.075
CPI-CS01A4D7E2F	BMR1B_AVR2A_BMP5	complex:BMR1B_AVR2A	simple:P22003		BMP5	TRUE	TRUE	FALSE	curated	FALSE	0.016	0.019	0.039	0	0.029	0.287	0.29	0.31	0	0.3	0.156	0.16	0.179	0	0.17	0.061	0.064	0.083	0	0.074	0.026	0.029	0.048	0	0.039
CPI-CS0BEC40E19	BMR1B_AVR2B_BMP5	complex:BMR1B_AVR2B	simple:P22003		BMP5	TRUE	TRUE	FALSE	curated	FALSE	0.016	0.019	0.039	0	0.029	0.089	0.093	0.112	0	0.103	0.029	0.032	0.051	0	0.042	0.049	0.052	0.071	0	0.062	0.026	0.029	0.048	0	0.039
CPI-CS0C16967C6	ACVR1_BMPR2_BMP6	complex:ACVR1_BMPR2	simple:P22004		BMP6	TRUE	TRUE	FALSE	curated	FALSE	0.125	0.202	0.139	0.125	0	0.743	0.82	0.757	0.743	0	0.287	0.363	0.3	0.286	0	0.274	0.351	0.288	0.274	0	0.316	0.393	0.33	0.316	0
CPI-CS0FFBA02F8	ACVR_1A2A receptor_BMP6	complex:ACVR_1A2A receptor	simple:P22004		BMP6	TRUE	TRUE	FALSE	curated	FALSE	0.074	0.151	0.088	0.073	0	0.515	0.592	0.529	0.515	0	0.158	0.235	0.172	0.158	0	0.149	0.226	0.163	0.148	0	0.188	0.264	0.201	0.187	0
CPI-CS02AEFFE28	ACVR_1A2B receptor_BMP6	complex:ACVR_1A2B receptor	simple:P22004		BMP6	TRUE	TRUE	FALSE	curated	FALSE	0.041	0.118	0.055	0.041	0	0.091	0.168	0.105	0.091	0	0.031	0.107	0.044	0.03	0	0.05	0.127	0.064	0.05	0	0.064	0.141	0.078	0.063	0
CPI-CS0F6CFB979	BMPR1A_BMPR2_BMP6	complex:BMPR1A_BMPR2	simple:P22004		BMP6	TRUE	TRUE	FALSE	curated	FALSE	0.169	0.246	0.183	0.168	0	0.495	0.572	0.509	0.495	0	0.512	0.589	0.526	0.512	0	0.17	0.247	0.184	0.17	0	0.36	0.437	0.374	0.36	0
CPI-CS0EF793D6A	BMPR1B_BMPR2_BMP6	complex:BMPR1B_BMPR2	simple:P22004		BMP6	TRUE	TRUE	FALSE	curated	FALSE	0.018	0.095	0.032	0.018	0	0.289	0.366	0.303	0.289	0	0.533	0.61	0.547	0.533	0	0.062	0.139	0.076	0.062	0	0.027	0.104	0.041	0.027	0
CPI-CS0247DA882	BMR1A_ACR2A_BMP6	complex:BMR1A_ACR2A	simple:P22004		BMP6	TRUE	TRUE	FALSE	curated	FALSE	0.074	0.151	0.088	0.073	0	0.495	0.572	0.509	0.495	0	0.158	0.235	0.172	0.158	0	0.149	0.226	0.163	0.148	0	0.188	0.264	0.201	0.187	0
CPI-CS076E1A639	BMR1A_AVR2B_BMP6	complex:BMR1A_AVR2B	simple:P22004		BMP6	TRUE	TRUE	FALSE	curated	FALSE	0.041	0.118	0.055	0.041	0	0.091	0.168	0.105	0.091	0	0.031	0.107	0.044	0.03	0	0.05	0.127	0.064	0.05	0	0.064	0.141	0.078	0.063	0
CPI-CS0921BB754	BMR1B_AVR2A_BMP6	complex:BMR1B_AVR2A	simple:P22004		BMP6	TRUE	TRUE	FALSE	curated	FALSE	0.018	0.095	0.032	0.018	0	0.289	0.366	0.303	0.289	0	0.158	0.235	0.172	0.158	0	0.062	0.139	0.076	0.062	0	0.027	0.104	0.041	0.027	0
CPI-CS0C0D60519	BMR1B_AVR2B_BMP6	complex:BMR1B_AVR2B	simple:P22004		BMP6	TRUE	TRUE	FALSE	curated	FALSE	0.018	0.095	0.032	0.018	0	0.091	0.168	0.105	0.091	0	0.031	0.107	0.044	0.03	0	0.05	0.127	0.064	0.05	0	0.027	0.104	0.041	0.027	0
CPI-CC045C36F28	ACVR_1A2A receptor_Activin ligand ab	complex:ACVR_1A2A receptor	complex:Activin ligand ab			TRUE	TRUE	FALSE	curated	FALSE	0.073	0.105	0.083	0.074	0.1	0.514	0.546	0.524	0.516	0.541	0.158	0.189	0.167	0.159	0.184	0.148	0.18	0.158	0.149	0.175	0.187	0.219	0.196	0.188	0.214
CPI-CC09863F59B	ACVR_1A2B receptor_Activin ligand ab	complex:ACVR_1A2B receptor	complex:Activin ligand ab			TRUE	TRUE	FALSE	curated	FALSE	0.041	0.073	0.05	0.042	0.068	0.091	0.122	0.1	0.092	0.117	0.03	0.062	0.039	0.031	0.057	0.05	0.081	0.059	0.051	0.076	0.063	0.095	0.073	0.064	0.09
CPI-CC0104F2A96	ACVR_1B2A receptor_Activin ligand ab	complex:ACVR_1B2A receptor	complex:Activin ligand ab			TRUE	TRUE	FALSE	curated	FALSE	0.028	0.059	0.037	0.029	0.054	0.218	0.249	0.227	0.219	0.244	0.039	0.07	0.048	0.04	0.065	0.05	0.081	0.059	0.051	0.076	0.068	0.1	0.078	0.069	0.095
CPI-CC072007F09	ACVR_1B2B receptor_Activin ligand ab	complex:ACVR_1B2B receptor	complex:Activin ligand ab			TRUE	TRUE	FALSE	curated	FALSE	0.028	0.059	0.037	0.029	0.054	0.091	0.122	0.1	0.092	0.117	0.03	0.062	0.039	0.031	0.057	0.05	0.081	0.059	0.051	0.076	0.063	0.095	0.073	0.064	0.09
CPI-CC0947744F4	ACVR_1C2A receptor_Activin ligand ab	complex:ACVR_1C2A receptor	complex:Activin ligand ab			TRUE	TRUE	FALSE	curated	FALSE	0.007	0.038	0.016	0.008	0.033	0.026	0.058	0.036	0.028	0.053	0.158	0.189	0.167	0.159	0.184	0.006	0.038	0.016	0.007	0.033	0.005	0.037	0.014	0.006	0.032
CPI-CC0B6E6E341	ACVR_1C2B receptor_Activin ligand ab	complex:ACVR_1C2B receptor	complex:Activin ligand ab			TRUE	TRUE	FALSE	curated	FALSE	0.007	0.038	0.016	0.008	0.033	0.026	0.058	0.036	0.028	0.053	0.03	0.062	0.039	0.031	0.057	0.006	0.038	0.016	0.007	0.033	0.005	0.037	0.014	0.006	0.032
CPI-CS091BF99D0	ACVR_1A2A receptor_INHBA	complex:ACVR_1A2A receptor	simple:P08476		INHBA	TRUE	TRUE	FALSE	curated	FALSE	0.077	0.235	0.124	0.079	0.143	0.518	0.676	0.565	0.52	0.585	0.162	0.32	0.208	0.163	0.228	0.152	0.31	0.199	0.154	0.218	0.191	0.349	0.237	0.193	0.257
CPI-CS04DD927C9	ACVR_1A2B receptor_INHBA	complex:ACVR_1A2B receptor	simple:P08476		INHBA	TRUE	TRUE	FALSE	curated	FALSE	0.045	0.203	0.091	0.047	0.111	0.095	0.253	0.141	0.096	0.161	0.034	0.192	0.08	0.036	0.1	0.054	0.212	0.1	0.056	0.12	0.067	0.225	0.114	0.069	0.133
CPI-CS0533A30DC	ACVR_1B2A receptor_INHBA	complex:ACVR_1B2A receptor	simple:P08476		INHBA	TRUE	TRUE	FALSE	curated	FALSE	0.032	0.19	0.078	0.033	0.098	0.222	0.38	0.268	0.224	0.288	0.043	0.2	0.089	0.044	0.109	0.054	0.212	0.1	0.056	0.12	0.072	0.23	0.118	0.074	0.138
CPI-CS0C159B54D	ACVR_1B2B receptor_INHBA	complex:ACVR_1B2B receptor	simple:P08476		INHBA	TRUE	TRUE	FALSE	curated	FALSE	0.032	0.19	0.078	0.033	0.098	0.095	0.253	0.141	0.096	0.161	0.034	0.192	0.08	0.036	0.1	0.054	0.212	0.1	0.056	0.12	0.067	0.225	0.114	0.069	0.133
CPI-CS0924060DB	ACVR_1C2A receptor_INHBA	complex:ACVR_1C2A receptor	simple:P08476		INHBA	TRUE	TRUE	FALSE	curated	FALSE	0.011	0.169	0.057	0.012	0.077	0.03	0.188	0.077	0.032	0.097	0.162	0.32	0.208	0.163	0.228	0.01	0.168	0.057	0.012	0.077	0.009	0.167	0.055	0.011	0.075
CPI-CS0B79F5D68	ACVR_1C2B receptor_INHBA	complex:ACVR_1C2B receptor	simple:P08476		INHBA	TRUE	TRUE	FALSE	curated	FALSE	0.011	0.169	0.057	0.012	0.077	0.03	0.188	0.077	0.032	0.097	0.034	0.192	0.08	0.036	0.1	0.01	0.168	0.057	0.012	0.077	0.009	0.167	0.055	0.011	0.075
CPI-CS073233FCC	ACVR_1A2A receptor_INHBB	complex:ACVR_1A2A receptor	simple:P09529		INHBB	TRUE	TRUE	FALSE	curated	FALSE	0.073	0.105	0.083	0.074	0.1	0.514	0.546	0.524	0.516	0.541	0.158	0.189	0.167	0.159	0.184	0.148	0.18	0.158	0.149	0.175	0.187	0.219	0.196	0.188	0.214
CPI-CS048465560	ACVR_1A2B receptor_INHBB	complex:ACVR_1A2B receptor	simple:P09529		INHBB	TRUE	TRUE	FALSE	curated	FALSE	0.041	0.073	0.05	0.042	0.068	0.091	0.122	0.1	0.092	0.117	0.03	0.062	0.039	0.031	0.057	0.05	0.081	0.059	0.051	0.076	0.063	0.095	0.073	0.064	0.09
CPI-CS02899BF8B	ACVR_1B2A receptor_INHBB	complex:ACVR_1B2A receptor	simple:P09529		INHBB	TRUE	TRUE	FALSE	curated	FALSE	0.028	0.059	0.037	0.029	0.054	0.218	0.249	0.227	0.219	0.244	0.039	0.07	0.048	0.04	0.065	0.05	0.081	0.059	0.051	0.076	0.068	0.1	0.078	0.069	0.095
CPI-CS085EF890A	ACVR_1B2B receptor_INHBB	complex:ACVR_1B2B receptor	simple:P09529		INHBB	TRUE	TRUE	FALSE	curated	FALSE	0.028	0.059	0.037	0.029	0.054	0.091	0.122	0.1	0.092	0.117	0.03	0.062	0.039	0.031	0.057	0.05	0.081	0.059	0.051	0.076	0.063	0.095	0.073	0.064	0.09
CPI-CS007ADC2D1	ACVR_1C2A receptor_INHBB	complex:ACVR_1C2A receptor	simple:P09529		INHBB	TRUE	TRUE	FALSE	curated	FALSE	0.007	0.038	0.016	0.008	0.033	0.026	0.058	0.036	0.028	0.053	0.158	0.189	0.167	0.159	0.184	0.006	0.038	0.016	0.007	0.033	0.005	0.037	0.014	0.006	0.032
CPI-CS0A5400A6A	ACVR_1C2B receptor_INHBB	complex:ACVR_1C2B receptor	simple:P09529		INHBB	TRUE	TRUE	FALSE	curated	FALSE	0.007	0.038	0.016	0.008	0.033	0.026	0.058	0.036	0.028	0.053	0.03	0.062	0.039	0.031	0.057	0.006	0.038	0.016	0.007	0.033	0.005	0.037	0.014	0.006	0.032
CPI-CS0E4E75E3B	BMPR1A_BMPR2_BMP2	complex:BMPR1A_BMPR2	simple:P12643		BMP2	TRUE	TRUE	FALSE	curated	FALSE	0.173	0.186	0.167	0.169	0.18	0.5	0.512	0.494	0.496	0.507	0.516	0.529	0.511	0.513	0.524	0.174	0.187	0.168	0.171	0.182	0.364	0.377	0.358	0.361	0.371
CPI-CS028ACED72	BMPR1B_BMPR2_BMP2	complex:BMPR1B_BMPR2	simple:P12643		BMP2	TRUE	TRUE	FALSE	curated	FALSE	0.022	0.035	0.016	0.019	0.029	0.293	0.306	0.287	0.289	0.3	0.538	0.55	0.532	0.534	0.545	0.067	0.079	0.061	0.063	0.074	0.032	0.044	0.026	0.028	0.039
CPI-CS075442484	BMR1A_ACR2A_BMP2	complex:BMR1A_ACR2A	simple:P12643		BMP2	TRUE	TRUE	FALSE	curated	FALSE	0.078	0.09	0.072	0.074	0.085	0.5	0.512	0.494	0.496	0.507	0.162	0.175	0.157	0.159	0.17	0.153	0.165	0.147	0.149	0.16	0.192	0.204	0.186	0.188	0.199
CPI-CS0BE59B43E	BMR1A_AVR2B_BMP2	complex:BMR1A_AVR2B	simple:P12643		BMP2	TRUE	TRUE	FALSE	curated	FALSE	0.046	0.058	0.04	0.042	0.053	0.095	0.108	0.09	0.092	0.103	0.035	0.047	0.029	0.031	0.042	0.055	0.067	0.049	0.051	0.062	0.068	0.081	0.062	0.064	0.075
CPI-CS08A043594	BMR1B_AVR2A_BMP2	complex:BMR1B_AVR2A	simple:P12643		BMP2	TRUE	TRUE	FALSE	curated	FALSE	0.022	0.035	0.016	0.019	0.029	0.293	0.306	0.287	0.289	0.3	0.162	0.175	0.157	0.159	0.17	0.067	0.079	0.061	0.063	0.074	0.032	0.044	0.026	0.028	0.039
CPI-CS058910188	BMR1B_AVR2B_BMP2	complex:BMR1B_AVR2B	simple:P12643		BMP2	TRUE	TRUE	FALSE	curated	FALSE	0.022	0.035	0.016	0.019	0.029	0.095	0.108	0.09	0.092	0.103	0.035	0.047	0.029	0.031	0.042	0.055	0.067	0.049	0.051	0.062	0.032	0.044	0.026	0.028	0.039
CPI-CS0E54FF657	BMPR1A_BMPR2_BMP4	complex:BMPR1A_BMPR2	simple:P12644		BMP4	TRUE	TRUE	FALSE	curated	FALSE	0.166	0.169	0.168	0.167	0.212	0.493	0.496	0.495	0.493	0.539	0.51	0.513	0.511	0.51	0.555	0.167	0.17	0.169	0.168	0.213	0.357	0.36	0.359	0.358	0.403
CPI-CS0107C51C6	BMPR1B_BMPR2_BMP4	complex:BMPR1B_BMPR2	simple:P12644		BMP4	TRUE	TRUE	FALSE	curated	FALSE	0.015	0.018	0.017	0.016	0.061	0.286	0.289	0.288	0.287	0.332	0.531	0.534	0.532	0.531	0.576	0.06	0.063	0.061	0.06	0.105	0.025	0.028	0.026	0.025	0.07
CPI-CS012D15A88	BMR1A_ACR2A_BMP4	complex:BMR1A_ACR2A	simple:P12644		BMP4	TRUE	TRUE	FALSE	curated	FALSE	0.071	0.074	0.073	0.072	0.117	0.493	0.496	0.495	0.493	0.539	0.156	0.159	0.157	0.156	0.201	0.146	0.149	0.148	0.147	0.192	0.185	0.188	0.187	0.185	0.231
CPI-CS0BCDC40FC	BMR1A_AVR2B_BMP4	complex:BMR1A_AVR2B	simple:P12644		BMP4	TRUE	TRUE	FALSE	curated	FALSE	0.039	0.042	0.041	0.039	0.085	0.088	0.092	0.09	0.089	0.134	0.028	0.031	0.03	0.028	0.074	0.048	0.051	0.049	0.048	0.093	0.061	0.064	0.063	0.062	0.107
CPI-CS02957B1BF	BMR1B_AVR2A_BMP4	complex:BMR1B_AVR2A	simple:P12644		BMP4	TRUE	TRUE	FALSE	curated	FALSE	0.015	0.018	0.017	0.016	0.061	0.286	0.289	0.288	0.287	0.332	0.156	0.159	0.157	0.156	0.201	0.06	0.063	0.061	0.06	0.105	0.025	0.028	0.026	0.025	0.07
CPI-CS0E997FABD	BMR1B_AVR2B_BMP4	complex:BMR1B_AVR2B	simple:P12644		BMP4	TRUE	TRUE	FALSE	curated	FALSE	0.015	0.018	0.017	0.016	0.061	0.088	0.092	0.09	0.089	0.134	0.028	0.031	0.03	0.028	0.074	0.048	0.051	0.049	0.048	0.093	0.025	0.028	0.026	0.025	0.07
CPI-CS0B9A4CA4D	BMPR1A_BMPR2_GDF6	complex:BMPR1A_BMPR2	simple:Q6KF10		GDF6	TRUE	TRUE	FALSE	curated	FALSE	0	0.167	0.167	0	0.168	0	0.494	0.494	0	0.495	0	0.511	0.511	0	0.512	0	0.169	0.168	0	0.169	0	0.359	0.358	0	0.359
CPI-CS0C623F17A	BMPR1B_BMPR2_GDF6	complex:BMPR1B_BMPR2	simple:Q6KF10		GDF6	TRUE	TRUE	FALSE	curated	FALSE	0	0.017	0.016	0	0.017	0	0.288	0.287	0	0.288	0	0.532	0.532	0	0.533	0	0.061	0.061	0	0.062	0	0.026	0.026	0	0.027
CPI-CS04C402DFB	BMR1A_ACR2A_GDF6	complex:BMR1A_ACR2A	simple:Q6KF10		GDF6	TRUE	TRUE	FALSE	curated	FALSE	0	0.072	0.072	0	0.073	0	0.494	0.494	0	0.495	0	0.157	0.157	0	0.158	0	0.147	0.147	0	0.148	0	0.186	0.186	0	0.187
CPI-CS0546460D1	BMR1A_AVR2B_GDF6	complex:BMR1A_AVR2B	simple:Q6KF10		GDF6	TRUE	TRUE	FALSE	curated	FALSE	0	0.04	0.04	0	0.041	0	0.09	0.09	0	0.091	0	0.029	0.029	0	0.03	0	0.049	0.049	0	0.05	0	0.062	0.062	0	0.063
CPI-CS0D9226707	BMR1B_AVR2A_GDF6	complex:BMR1B_AVR2A	simple:Q6KF10		GDF6	TRUE	TRUE	FALSE	curated	FALSE	0	0.017	0.016	0	0.017	0	0.288	0.287	0	0.288	0	0.157	0.157	0	0.158	0	0.061	0.061	0	0.062	0	0.026	0.026	0	0.027
CPI-CS027F8BD7E	BMR1B_AVR2B_GDF6	complex:BMR1B_AVR2B	simple:Q6KF10		GDF6	TRUE	TRUE	FALSE	curated	FALSE	0	0.017	0.016	0	0.017	0	0.09	0.09	0	0.091	0	0.029	0.029	0	0.03	0	0.049	0.049	0	0.05	0	0.026	0.026	0	0.027
CPI-CS0CFA0E4C5	BMPR1A_BMPR2_GDF7	complex:BMPR1A_BMPR2	simple:Q7Z4P5		GDF7	TRUE	TRUE	FALSE	curated	FALSE	0.166	0.168	0	0.167	0	0.493	0.495	0	0.493	0	0.51	0.511	0	0.51	0	0.167	0.169	0	0.168	0	0.357	0.359	0	0.358	0
CPI-CS027D7A724	BMPR1B_BMPR2_GDF7	complex:BMPR1B_BMPR2	simple:Q7Z4P5		GDF7	TRUE	TRUE	FALSE	curated	FALSE	0.015	0.017	0	0.016	0	0.286	0.288	0	0.287	0	0.531	0.532	0	0.531	0	0.06	0.061	0	0.06	0	0.025	0.026	0	0.025	0
CPI-CS05789C9A0	BMR1A_ACR2A_GDF7	complex:BMR1A_ACR2A	simple:Q7Z4P5		GDF7	TRUE	TRUE	FALSE	curated	FALSE	0.071	0.073	0	0.072	0	0.493	0.495	0	0.493	0	0.156	0.157	0	0.156	0	0.146	0.148	0	0.147	0	0.185	0.187	0	0.185	0
CPI-CS0E5078EDE	BMR1A_AVR2B_GDF7	complex:BMR1A_AVR2B	simple:Q7Z4P5		GDF7	TRUE	TRUE	FALSE	curated	FALSE	0.039	0.041	0	0.039	0	0.088	0.09	0	0.089	0	0.028	0.03	0	0.028	0	0.048	0.049	0	0.048	0	0.061	0.063	0	0.062	0
CPI-CS0BDA0D08C	BMR1B_AVR2A_GDF7	complex:BMR1B_AVR2A	simple:Q7Z4P5		GDF7	TRUE	TRUE	FALSE	curated	FALSE	0.015	0.017	0	0.016	0	0.286	0.288	0	0.287	0	0.156	0.157	0	0.156	0	0.06	0.061	0	0.06	0	0.025	0.026	0	0.025	0
CPI-CS055E15573	BMR1B_AVR2B_GDF7	complex:BMR1B_AVR2B	simple:Q7Z4P5		GDF7	TRUE	TRUE	FALSE	curated	FALSE	0.015	0.017	0	0.016	0	0.088	0.09	0	0.089	0	0.028	0.03	0	0.028	0	0.048	0.049	0	0.048	0	0.025	0.026	0	0.025	0
CPI-CS0569B9B91	BMPR1B_BMPR2_BMPR1A	complex:BMPR1B_BMPR2	simple:P36894		BMPR1A	FALSE	TRUE	TRUE	curated	FALSE	0.181	0.507	0.524	0.182	0.372	0.451	0.778	0.795	0.453	0.643	0.696	1.023	1.039	0.697	0.887	0.225	0.552	0.569	0.226	0.416	0.19	0.517	0.533	0.191	0.381
CPI-CS09F35DDEB	ACVR_1B2A receptor_MSTN	complex:ACVR_1B2A receptor	simple:O14793		MSTN	TRUE	TRUE	FALSE	curated	FALSE	0	0.026	0	0	0	0	0.216	0	0	0	0	0.037	0	0	0	0	0.048	0	0	0	0	0.066	0	0	0
CPI-CS0AED3F8E8	ACVR_1B2B receptor_MSTN	complex:ACVR_1B2B receptor	simple:O14793		MSTN	TRUE	TRUE	FALSE	curated	FALSE	0	0.026	0	0	0	0	0.089	0	0	0	0	0.028	0	0	0	0	0.048	0	0	0	0	0.062	0	0	0
CPI-CS0C8F1E01F	ACVR_1B2A receptor_BMP3	complex:ACVR_1B2A receptor	simple:P12645		BMP3	TRUE	TRUE	FALSE	curated	FALSE	0.026	0.035	0	0	0.027	0.216	0.226	0	0	0.218	0.037	0.046	0	0	0.038	0.048	0.058	0	0	0.05	0.066	0.076	0	0	0.068
CPI-CS06C0EEFCB	ACVR_1B2B receptor_GDF10	complex:ACVR_1B2B receptor	simple:P55107		GDF10	TRUE	TRUE	FALSE	curated	FALSE	0.025	0.026	0.026	0	0	0.088	0.089	0.089	0	0	0.028	0.029	0.028	0	0	0.047	0.048	0.048	0	0	0.061	0.062	0.061	0	0
CPI-CS0B0B35928	CNTF-1R_CNTF	complex:CNTF-1R	simple:P26441		CNTF	TRUE	TRUE	FALSE	curated	FALSE	0.033	0.043	0.034	0	0.037	0.214	0.224	0.215	0	0.217	0.156	0.166	0.157	0	0.159	0.017	0.026	0.018	0	0.02	0.077	0.087	0.078	0	0.08
CPI-SS0D795AC00	EGFR_CNTF	simple:P00533	simple:P26441	EGFR	CNTF	TRUE	TRUE	FALSE	InnateDB-All	FALSE	0.006	0.016	0.007	0	0.009	0.027	0.036	0.028	0	0.03	0.869	0.879	0.87	0	0.872	0.007	0.017	0.008	0	0.01	0.007	0.016	0.008	0	0.01
CPI-CS0EB5F7B6F	CNTF-1R_CLCF1	complex:CNTF-1R	simple:Q9UBD9		CLCF1	TRUE	TRUE	FALSE	curated	FALSE	0.032	0.034	0.033	0.044	0	0.213	0.215	0.214	0.225	0	0.155	0.157	0.156	0.167	0	0.015	0.017	0.016	0.027	0	0.076	0.078	0.077	0.087	0
CPI-SS0B02DE712	EGFR_NRG1	simple:P00533	simple:Q02297	EGFR	NRG1	TRUE	TRUE	TRUE	I2D,IMEx,InnateDB-All,IntAct	FALSE	0.542	17.683	1.387	1.089	1.55	0.563	17.704	1.408	1.109	1.571	1.405	18.547	2.25	1.952	2.414	0.544	17.685	1.388	1.09	1.552	0.543	17.684	1.388	1.089	1.551
CPI-SS09375CA29	ADGRL1_NRG1	simple:O94910	simple:Q02297	ADGRL1	NRG1	TRUE	TRUE	TRUE	InnateDB-All	FALSE	0.567	17.708	1.411	1.113	1.575	1.09	18.231	1.935	1.636	2.098	0.948	18.09	1.793	1.495	1.957	0.587	17.728	1.432	1.134	1.595	0.807	17.949	1.652	1.354	1.816
CPI-SS00A953C3A	EGF_NRG1	simple:P01133	simple:Q02297	EGF	NRG1	TRUE	FALSE	TRUE	I2D	FALSE	0.551	17.692	1.396	1.097	1.559	0.614	17.755	1.459	1.16	1.622	0.572	17.713	1.417	1.118	1.58	0.55	17.691	1.395	1.096	1.558	0.567	17.708	1.412	1.114	1.575
CPI-SS0F4D30D5A	EGFR_EGF	simple:P00533	simple:P01133	EGFR	EGF	TRUE	TRUE	FALSE	curated	FALSE	0.017	0.08	0.038	0.016	0.033	0.038	0.101	0.059	0.037	0.054	0.88	0.943	0.901	0.879	0.897	0.018	0.082	0.039	0.018	0.035	0.018	0.081	0.039	0.017	0.034
CPI-SS0E25CE362	EGFR_TGFA	simple:P00533	simple:P01135	EGFR	TGFA	TRUE	TRUE	FALSE	curated	FALSE	0.159	0.08	0.038	0.168	0.378	0.179	0.1	0.059	0.188	0.399	1.022	0.943	0.901	1.031	1.241	0.16	0.081	0.039	0.169	0.379	0.159	0.08	0.039	0.168	0.379
CPI-SS0055264F3	EGFR_TGFB1	simple:P00533	simple:P01137	EGFR	TGFB1	TRUE	TRUE	FALSE	IMEx,InnateDB-All,MINT	FALSE	0.005	0.013	0.01	0.211	0	0.026	0.034	0.03	0.232	0	0.868	0.876	0.873	1.074	0	0.007	0.014	0.011	0.212	0	0.006	0.014	0.01	0.212	0
CPI-SS00EDDD458	EGFR_MIF	simple:P00533	simple:P14174	EGFR	MIF	TRUE	TRUE	FALSE	IMEx,InnateDB-All	FALSE	0.047	0.117	0.064	0.048	0.067	0.068	0.137	0.085	0.068	0.088	0.91	0.98	0.927	0.911	0.931	0.048	0.118	0.066	0.049	0.069	0.048	0.117	0.065	0.048	0.068
CPI-SS0ABC5C1B8	CD74_MIF	simple:P04233	simple:P14174	CD74	MIF	TRUE	TRUE	FALSE	I2D,InnateDB-All	FALSE	0.043	0.113	0.061	0.044	0.064	0.05	0.12	0.068	0.051	0.071	0.044	0.114	0.061	0.045	0.065	0.058	0.127	0.075	0.058	0.078	0.045	0.115	0.062	0.046	0.066
CPI-SS0481D83A4	EGFR_AREG	simple:P00533	simple:P15514	EGFR	AREG	TRUE	TRUE	FALSE	curated	FALSE	0	0.005	0	0	0	0	0.026	0	0	0	0	0.868	0	0	0	0	0.006	0	0	0	0	0.006	0	0	0
CPI-SS0D4C221B8	ICAM1_AREG	simple:P05362	simple:P15514	ICAM1	AREG	TRUE	TRUE	FALSE	InnateDB-All	FALSE	0	0.001	0	0	0	0	0.002	0	0	0	0	0.004	0	0	0	0	0.056	0	0	0	0	0.006	0	0	0
CPI-SS08CA619FE	EGFR_GRN	simple:P00533	simple:P28799	EGFR	GRN	TRUE	TRUE	FALSE	InnateDB-All	FALSE	0.022	0.06	0.031	0.214	0.036	0.043	0.08	0.052	0.235	0.056	0.886	0.923	0.894	1.077	0.899	0.024	0.061	0.032	0.215	0.037	0.023	0.06	0.032	0.215	0.036
CPI-SS0DA033F03	TNFRSF1A_GRN	simple:P19438	simple:P28799	TNFRSF1A	GRN	TRUE	TRUE	FALSE	IMEx,InnateDB-All,MINT	FALSE	0.019	0.057	0.028	0.211	0.033	0.021	0.058	0.029	0.212	0.034	0.055	0.092	0.063	0.246	0.068	0.042	0.08	0.051	0.234	0.056	0.04	0.077	0.049	0.231	0.053
CPI-SS054D158CC	NTRK1_GRN	simple:P04629	simple:P28799	NTRK1	GRN	TRUE	TRUE	FALSE	InnateDB-All	FALSE	0.018	0.056	0.027	0.21	0.032	0.02	0.057	0.029	0.212	0.033	0	0	0	0	0	0	0	0	0	0	0	0	0	0	0
CPI-SS0C4E86714	TNFRSF1B_GRN	simple:P20333	simple:P28799	TNFRSF1B	GRN	TRUE	TRUE	FALSE	IMEx,InnateDB-All,MINT	FALSE	0.019	0.057	0.028	0.211	0.033	0.034	0.071	0.043	0.226	0.047	0.02	0.058	0.029	0.212	0.034	0.116	0.154	0.125	0.308	0.13	0.023	0.06	0.032	0.215	0.036
CPI-SS0A19E9C34	EGFR_BTC	simple:P00533	simple:P35070	EGFR	BTC	TRUE	TRUE	FALSE	curated	FALSE	0.055	0.012	0.014	0.015	0.009	0.075	0.033	0.035	0.036	0.03	0.918	0.875	0.877	0.879	0.872	0.056	0.014	0.015	0.017	0.01	0.055	0.013	0.015	0.016	0.01
CPI-SS088A0A760	EGFR_COPA	simple:P00533	simple:P53621	EGFR	COPA	TRUE	TRUE	FALSE	InnateDB-All	FALSE	0.14	0.578	0.215	0.171	0.218	0.161	0.598	0.235	0.192	0.238	1.003	1.441	1.078	1.034	1.081	0.141	0.579	0.216	0.173	0.219	0.141	0.578	0.215	0.172	0.218
CPI-SS0302E8E8F	CD74_COPA	simple:P04233	simple:P53621	CD74	COPA	TRUE	TRUE	FALSE	IMEx,IntAct	FALSE	0.136	0.574	0.211	0.168	0.214	0.144	0.581	0.218	0.175	0.221	0.137	0.575	0.212	0.168	0.215	0.151	0.588	0.225	0.182	0.228	0.138	0.576	0.213	0.169	0.216
CPI-SS0E6E8A727	NTRK1_COPA	simple:P04629	simple:P53621	NTRK1	COPA	TRUE	TRUE	FALSE	InnateDB-All	FALSE	0.136	0.574	0.21	0.167	0.214	0.138	0.575	0.212	0.169	0.215	0	0	0	0	0	0	0	0	0	0	0	0	0	0	0
CPI-SS0C10824C7	EGFR_HBEGF	simple:P00533	simple:Q99075	EGFR	HBEGF	TRUE	TRUE	TRUE	curated	FALSE	0.008	0.032	0.048	0.007	0.053	0.029	0.052	0.069	0.028	0.073	0.871	0.895	0.911	0.87	0.916	0.009	0.033	0.049	0.008	0.054	0.009	0.032	0.049	0.008	0.053
CPI-SS0632A027A	CD44_HBEGF	simple:P16070	simple:Q99075	CD44	HBEGF	TRUE	TRUE	TRUE	I2D,InnateDB-All	FALSE	0.01	0.033	0.05	0.009	0.054	0.016	0.039	0.056	0.015	0.061	0.017	0.041	0.057	0.016	0.062	0.014	0.037	0.054	0.013	0.059	0.021	0.044	0.061	0.02	0.066
CPI-SS03098AC28	ERBB4_HBEGF	simple:Q15303	simple:Q99075	ERBB4	HBEGF	TRUE	TRUE	TRUE	curated	FALSE	2.704	2.727	2.744	2.703	2.749	6.175	6.199	6.215	6.174	6.22	6.651	6.674	6.69	6.649	6.695	0.76	0.783	0.8	0.759	0.805	8.647	8.67	8.687	8.646	8.692
CPI-SS03C51D352	TNFRSF13B_TNFSF13B	simple:O14836	simple:Q9Y275	TNFRSF13B	TNFSF13B	TRUE	TRUE	FALSE	curated	FALSE	0.01	0.206	0.02	0.123	0.015	0.012	0.207	0.021	0.124	0.016	0	0	0	0	0	0.051	0.246	0.061	0.163	0.055	0.012	0.208	0.022	0.125	0.017
CPI-SS03133B4F2	TFRC_TNFSF13B	simple:P02786	simple:Q9Y275	TFRC	TNFSF13B	TRUE	TRUE	FALSE	IMEx,IntAct	FALSE	0.072	0.268	0.082	0.185	0.077	0.609	0.804	0.619	0.721	0.614	0.168	0.363	0.178	0.28	0.173	0.065	0.261	0.075	0.178	0.07	0.1	0.295	0.11	0.212	0.104
CPI-SS0F00D756A	CD40_TNFSF13B	simple:P25942	simple:Q9Y275	CD40	TNFSF13B	TRUE	TRUE	FALSE	I2D,InnateDB	FALSE	0.011	0.207	0.021	0.124	0.016	0.021	0.217	0.031	0.134	0.026	0.012	0.208	0.022	0.125	0.017	0.011	0.206	0.021	0.123	0.015	0	0	0	0	0
CPI-SS0E2863F09	TNFRSF17_TNFSF13B	simple:Q02223	simple:Q9Y275	TNFRSF17	TNFSF13B	TRUE	TRUE	FALSE	curated	FALSE	0.01	0.206	0.02	0.123	0.015	0.01	0.206	0.02	0.123	0.015	0.01	0.206	0.02	0.123	0.015	0.016	0.212	0.026	0.129	0.021	0	0	0	0	0
CPI-SS09648FAA9	TNFRSF13C_TNFSF13B	simple:Q96RJ3	simple:Q9Y275	TNFRSF13C	TNFSF13B	TRUE	TRUE	FALSE	guidetopharmacology.org	FALSE	0.011	0.206	0.021	0.123	0.015	0.011	0.207	0.021	0.124	0.016	0	0	0	0	0	0	0	0	0	0	0.012	0.208	0.022	0.125	0.017
CPI-SS09808DEAE	CD74_APP	simple:P04233	simple:P05067	CD74	APP	FALSE	TRUE	FALSE	curated	FALSE	2.796	5.119	1.003	0.912	1.857	2.803	5.126	1.01	0.919	1.865	2.797	5.12	1.004	0.912	1.858	2.81	5.133	1.017	0.926	1.872	2.798	5.121	1.005	0.913	1.859
CPI-SS0E9A581F8	ICAM1_ITGAL	simple:P05362	simple:P20701	ICAM1	ITGAL	FALSE	TRUE	TRUE	curated	FALSE	0.001	0.002	0.003	0.003	0	0.001	0.002	0.003	0.003	0	0.004	0.005	0.006	0.005	0	0.056	0.057	0.058	0.058	0	0.005	0.006	0.007	0.007	0
CPI-SC0F4AC5AA2	ICAM1_aLb2 complex	simple:P05362	complex:aLb2 complex	ICAM1		FALSE	TRUE	FALSE	curated	TRUE	0.001	0.001	0	0.002	0	0.001	0.001	0	0.002	0	0.004	0.004	0	0.004	0	0.056	0.056	0	0.057	0	0.005	0.005	0	0.006	0
CPI-SC063BC3DDE	ICAM2_aLb2 complex	simple:P13598	complex:aLb2 complex	ICAM2		FALSE	FALSE	FALSE	curated	TRUE	0	0	0	0	0	0	0.001	0	0.001	0	0	0	0	0	0	0	0	0	0	0	0	0	0	0	0
CPI-SC092659F65	ICAM4_aLb2 complex	simple:Q14773	complex:aLb2 complex	ICAM4		TRUE	FALSE	FALSE	curated	TRUE	0	0.001	0	0.001	0	0.001	0.002	0	0.002	0	0.002	0.002	0	0.002	0	0	0	0	0	0	0	0	0	0	0
CPI-SC08923F7F7	F11R_aLb2 complex	simple:Q9Y624	complex:aLb2 complex	F11R		FALSE	TRUE	FALSE	curated	TRUE	0.002	0.002	0	0.003	0	0.01	0.011	0	0.011	0	0.009	0.01	0	0.01	0	0.299	0.299	0	0.3	0	0.003	0.003	0	0.003	0
CPI-SS0A4F27388	TNFRSF1A_FASLG	simple:P19438	simple:P48023	TNFRSF1A	FASLG	TRUE	TRUE	FALSE	I2D,InnateDB-All	FALSE	0.001	0.005	0.002	0	0	0.003	0.007	0.003	0	0	0.037	0.041	0.037	0	0	0.024	0.028	0.025	0	0	0.022	0.026	0.023	0	0
CPI-SS0049FD74F	TNFRSF10B_FASLG	simple:O14763	simple:P48023	TNFRSF10B	FASLG	TRUE	TRUE	FALSE	I2D,InnateDB-All	FALSE	0.004	0.008	0.004	0	0	0.04	0.044	0.041	0	0	0.011	0.015	0.011	0	0	0.005	0.009	0.005	0	0	0.029	0.033	0.03	0	0
CPI-SS03A0C857B	FAS_FASLG	simple:P25445	simple:P48023	FAS	FASLG	TRUE	TRUE	FALSE	curated	FALSE	0	0.004	0.001	0	0	0.002	0.006	0.003	0	0	0.022	0.026	0.023	0	0	0.003	0.007	0.003	0	0	0.007	0.011	0.008	0	0
CPI-SS004A073E1	NTRK1_NTF3	simple:P04629	simple:P20783	NTRK1	NTF3	TRUE	TRUE	FALSE	curated	FALSE	0	0.007	0	0	0	0	0.009	0	0	0	0	0	0	0	0	0	0	0	0	0	0	0	0	0	0
CPI-SS0ADA587B4	NGFR_NTF3	simple:P08138	simple:P20783	NGFR	NTF3	TRUE	TRUE	FALSE	curated	FALSE	0	0.011	0	0	0	0	0.01	0	0	0	0	0	0	0	0	0	0.008	0	0	0	0	0	0	0	0
CPI-SS0B1AB068C	NTRK1_GPI	simple:P04629	simple:P06744	NTRK1	GPI	TRUE	TRUE	FALSE	InnateDB-All	FALSE	0.093	0.623	0.323	0.095	0.085	0.095	0.625	0.325	0.096	0.087	0	0	0	0	0	0	0	0	0	0	0	0	0	0	0
CPI-SS0391D4602	NTRK1_NAMPT	simple:P04629	simple:P43490	NTRK1	NAMPT	TRUE	TRUE	FALSE	InnateDB-All	FALSE	0.071	0.243	0.071	0.057	0.09	0.072	0.244	0.073	0.058	0.092	0	0	0	0	0	0	0	0	0	0	0	0	0	0	0
CPI-SS00A6D366F	ADORA2A_NAMPT	simple:P29274	simple:P43490	ADORA2A	NAMPT	TRUE	TRUE	FALSE	I2D,IMEx,InnateDB-All,MINT	FALSE	0.071	0.242	0.071	0.057	0.09	0.071	0.243	0.072	0.057	0.091	0.075	0.247	0.076	0.062	0.095	0	0	0	0	0	0.073	0.245	0.074	0.059	0.092
CPI-SS05D1A6BEF	NTRK1_AIMP1	simple:P04629	simple:Q12904	NTRK1	AIMP1	TRUE	TRUE	FALSE	InnateDB-All	FALSE	0.063	0.26	0.11	0.065	0.08	0.064	0.262	0.112	0.067	0.082	0	0	0	0	0	0	0	0	0	0	0	0	0	0	0
CPI-SS074CF011C	ERBB4_NRG4	simple:Q15303	simple:Q8WWG1	ERBB4	NRG4	TRUE	TRUE	FALSE	curated	FALSE	2.71	2.943	2.724	2.719	2.712	6.181	6.414	6.195	6.191	6.184	6.657	6.889	6.671	6.666	6.659	0.766	0.999	0.78	0.776	0.768	8.653	8.886	8.667	8.663	8.655
CPI-CS067298D94	FLT1 complex_VEGFA	complex:FLT1 complex	simple:P15692		VEGFA	TRUE	TRUE	FALSE	curated	FALSE	0.037	0.183	0.896	0.021	0.754	0.038	0.184	0.897	0.022	0.755	0.035	0.182	0.895	0.02	0.753	0.038	0.185	0.898	0.023	0.756	0.037	0.184	0.897	0.022	0.755
CPI-SS0DE0A486F	NRP1_VEGFA	simple:O14786	simple:P15692	NRP1	VEGFA	TRUE	TRUE	FALSE	curated	FALSE	0.047	0.194	0.907	0.032	0.765	0.453	0.6	1.313	0.438	1.171	0.429	0.576	1.288	0.414	1.147	0.233	0.38	1.093	0.218	0.951	0.083	0.23	0.943	0.068	0.801
CPI-SS0E00478B4	NRP2_VEGFA	simple:O60462	simple:P15692	NRP2	VEGFA	TRUE	TRUE	FALSE	curated	FALSE	0.083	0.229	0.942	0.067	0.8	0.812	0.959	1.672	0.797	1.53	0.161	0.308	1.02	0.146	0.879	0.19	0.336	1.049	0.174	0.907	0.197	0.344	1.057	0.182	0.915
CPI-CS073D36B1D	FLT1 complex_PGF	complex:FLT1 complex	simple:P49763		PGF	TRUE	TRUE	FALSE	curated	FALSE	0.004	0.033	0.024	0.006	0.012	0.005	0.034	0.025	0.007	0.013	0.003	0.032	0.023	0.005	0.01	0.006	0.035	0.026	0.008	0.013	0.005	0.033	0.025	0.007	0.012
CPI-SS0855C0353	NRP1_PGF	simple:O14786	simple:P49763	NRP1	PGF	TRUE	TRUE	FALSE	curated	FALSE	0.015	0.044	0.035	0.017	0.022	0.421	0.45	0.441	0.423	0.428	0.397	0.425	0.417	0.399	0.404	0.201	0.23	0.221	0.203	0.208	0.051	0.08	0.071	0.053	0.058
CPI-SS0D22A09AD	NRP2_PGF	simple:O60462	simple:P49763	NRP2	PGF	TRUE	TRUE	FALSE	curated	FALSE	0.051	0.079	0.07	0.053	0.058	0.78	0.809	0.8	0.782	0.787	0.129	0.157	0.149	0.131	0.136	0.158	0.186	0.177	0.16	0.165	0.165	0.194	0.185	0.167	0.172
CPI-SS0E61DB5DF	FLT1_PGF	simple:P17948	simple:P49763	FLT1	PGF	TRUE	TRUE	FALSE	curated	FALSE	0.005	0.034	0.025	0.007	0.012	0.041	0.069	0.06	0.043	0.048	0.005	0.034	0.025	0.007	0.013	0.013	0.041	0.033	0.015	0.02	0.005	0.033	0.025	0.007	0.012
CPI-CS077F1340A	FLT1 complex_VEGFB	complex:FLT1 complex	simple:P49765		VEGFB	TRUE	TRUE	FALSE	curated	FALSE	0.019	0.127	0.076	0.027	0.065	0.02	0.128	0.077	0.028	0.066	0.018	0.126	0.075	0.026	0.064	0.021	0.129	0.078	0.029	0.067	0.02	0.128	0.076	0.027	0.066
CPI-SS033E6DE7E	NRP1_VEGFB	simple:O14786	simple:P49765	NRP1	VEGFB	TRUE	TRUE	FALSE	curated	FALSE	0.03	0.138	0.087	0.038	0.076	0.436	0.544	0.493	0.444	0.482	0.411	0.52	0.468	0.419	0.457	0.216	0.324	0.273	0.224	0.262	0.066	0.174	0.123	0.074	0.112
CPI-SS0947A8549	FLT1_VEGFB	simple:P17948	simple:P49765	FLT1	VEGFB	TRUE	TRUE	FALSE	curated	FALSE	0.02	0.128	0.077	0.028	0.066	0.055	0.163	0.112	0.063	0.101	0.02	0.128	0.077	0.028	0.066	0.027	0.136	0.084	0.035	0.073	0.02	0.128	0.076	0.027	0.066
CPI-SS098425155	ADRB2_VEGFB	simple:P07550	simple:P49765	ADRB2	VEGFB	TRUE	TRUE	FALSE	InnateDB-All	FALSE	0.018	0.126	0.074	0.025	0.063	0.017	0.126	0.074	0.025	0.063	0.018	0.126	0.075	0.026	0.064	0.041	0.15	0.098	0.049	0.087	0	0	0	0	0
CPI-SS08083B141	NRP1_SEMA3A	simple:O14786	simple:Q14563	NRP1	SEMA3A	TRUE	TRUE	FALSE	curated	FALSE	0.031	0.509	0.111	0.059	0.073	0.437	0.915	0.517	0.465	0.479	0.413	0.89	0.493	0.441	0.455	0.217	0.695	0.297	0.245	0.259	0.067	0.545	0.147	0.095	0.109
CPI-CS0E5D1ECCE	PlexinA1_complex3_SEMA3A	complex:PlexinA1_complex3	simple:Q14563		SEMA3A	TRUE	TRUE	FALSE	curated	FALSE	0.031	0.509	0.111	0.059	0.073	0.204	0.682	0.284	0.232	0.246	0.042	0.52	0.122	0.07	0.084	0.037	0.515	0.117	0.065	0.079	0.067	0.545	0.147	0.095	0.109
CPI-CS0D238C22B	PlexinA2_complex1_SEMA3A	complex:PlexinA2_complex1	simple:Q14563		SEMA3A	TRUE	TRUE	FALSE	curated	FALSE	0.031	0.509	0.111	0.059	0.073	0.437	0.915	0.517	0.465	0.479	0.171	0.649	0.252	0.199	0.214	0.105	0.583	0.185	0.133	0.147	0.067	0.545	0.147	0.095	0.109
CPI-CS0AA769F5B	PlexinA3_complex1_SEMA3A	complex:PlexinA3_complex1	simple:Q14563		SEMA3A	TRUE	TRUE	FALSE	curated	FALSE	0.023	0.501	0.104	0.052	0.066	0.075	0.553	0.156	0.103	0.118	0.029	0.507	0.109	0.057	0.071	0.024	0.502	0.104	0.052	0.066	0.055	0.533	0.135	0.083	0.097
CPI-CS0AB19226A	PlexinA4_complex1_SEMA3A	complex:PlexinA4_complex1	simple:Q14563		SEMA3A	TRUE	TRUE	FALSE	curated	FALSE	0.031	0.509	0.111	0.059	0.073	0.437	0.915	0.517	0.465	0.479	0.413	0.89	0.493	0.441	0.455	0.217	0.695	0.297	0.245	0.259	0.067	0.545	0.147	0.095	0.109
CPI-SS0F15C1AB3	NRP2_SEMA3F	simple:O60462	simple:Q13275	NRP2	SEMA3F	TRUE	TRUE	FALSE	curated	FALSE	0.049	0.068	0	0	0	0.779	0.798	0	0	0	0.127	0.146	0	0	0	0.156	0.175	0	0	0	0.164	0.183	0	0	0
CPI-SS0241A1F57	NRP2_SEMA3C	simple:O60462	simple:Q99985	NRP2	SEMA3C	TRUE	TRUE	FALSE	curated	FALSE	0.075	0.217	0.081	0.066	0.075	0.805	0.947	0.811	0.796	0.804	0.154	0.296	0.159	0.145	0.153	0.183	0.324	0.188	0.173	0.182	0.19	0.332	0.196	0.181	0.189
CPI-CS02E5ABC5D	Glycoprotein Ib complex_F2	complex:Glycoprotein Ib complex	simple:P00734		F2	TRUE	TRUE	FALSE	curated	FALSE	0	0.003	0	0	0.003	0	0.003	0	0	0.003	0	0	0	0	0	0.001	0.003	0	0	0.003	0	0	0	0	0
CPI-CS0152E177A	Glycoprotein Ib complex_VWF	complex:Glycoprotein Ib complex	simple:P04275		VWF	TRUE	TRUE	FALSE	curated	FALSE	0.003	0.015	0.005	0.009	0.017	0.003	0.015	0.005	0.009	0.017	0	0	0	0	0	0.004	0.015	0.006	0.009	0.018	0	0	0	0	0
CPI-SS0268D47AD	CCL4_GPR152	simple:P13236	simple:Q8TDT2	CCL4	GPR152	TRUE	FALSE	TRUE	IMEx,IntAct	FALSE	0.001	0.003	0.001	0.001	0	0.001	0.003	0.001	0.001	0	0	0	0	0	0	0.014	0.016	0.015	0.015	0	0	0	0	0	0
CPI-SS016B111FE	IGF2_GPR152	simple:P01344	simple:Q8TDT2	IGF2	GPR152	TRUE	FALSE	TRUE	IMEx,IntAct	FALSE	0.001	0.003	0.001	0.001	0	0.004	0.007	0.005	0.005	0	0.001	0.003	0.001	0.002	0	0.002	0.004	0.003	0.003	0	0.003	0.005	0.003	0.003	0
CPI-SS0714977CA	BDNF_GPR152	simple:P23560	simple:Q8TDT2	BDNF	GPR152	TRUE	FALSE	TRUE	IMEx,IntAct	FALSE	0.008	0.01	0.009	0.009	0	0.117	0.119	0.117	0.117	0	0.022	0.024	0.022	0.022	0	0.007	0.009	0.007	0.007	0	0.022	0.024	0.023	0.023	0
CPI-SS03FA58286	TNF_VSIR	simple:P01375	simple:Q9H7M9	TNF	VSIR	TRUE	FALSE	TRUE	IMEx,IntAct	FALSE	0	0	0	0	0	0	0	0	0	0	0	0	0	0	0	0.017	0.03	0.069	0.516	0.074	0	0	0	0	0
CPI-SS00AD71822	CCK_CCKBR	simple:P06307	simple:P32239	CCK	CCKBR	TRUE	FALSE	TRUE	guidetopharmacology.org	FALSE	0.012	0.141	0.02	0.014	0.01	0.059	0.189	0.067	0.061	0.058	0.017	0.147	0.025	0.019	0.016	0.013	0.143	0.021	0.015	0.012	0.016	0.146	0.024	0.018	0.015
CPI-SS0D1D95883	CCL4_CCR5	simple:P13236	simple:P51681	CCL4	CCR5	TRUE	FALSE	TRUE	curated	FALSE	0.002	0.007	0.006	0.213	0.008	0.002	0.007	0.006	0.213	0.008	0	0	0	0	0	0.015	0.021	0.02	0.226	0.021	0	0	0	0	0
CPI-SS0C090A257	CCL3_CCR5	simple:P10147	simple:P51681	CCL3	CCR5	TRUE	FALSE	TRUE	curated	FALSE	0.002	0.007	0.006	0.213	0.007	0	0	0	0	0	0	0	0	0	0	0.008	0.013	0.012	0.219	0.014	0	0	0	0	0
CPI-SS0795802F6	CCL4_SLC7A1	simple:P13236	simple:P30825	CCL4	SLC7A1	TRUE	FALSE	TRUE	IMEx,IntAct	FALSE	0.008	0.19	0.022	0.027	0.047	0.008	0.19	0.022	0.027	0.047	0	0	0	0	0	0.021	0.204	0.035	0.041	0.06	0	0	0	0	0
CPI-SS03105D292	CSF1_SLC7A1	simple:P09603	simple:P30825	CSF1	SLC7A1	TRUE	FALSE	TRUE	I2D	FALSE	0.139	0.322	0.153	0.159	0.178	0.058	0.24	0.072	0.077	0.097	0.062	0.245	0.076	0.082	0.101	0.041	0.224	0.055	0.061	0.08	0.082	0.265	0.096	0.102	0.121
CPI-SS05BA6D9C3	CCL4_CNR2	simple:P13236	simple:P34972	CCL4	CNR2	TRUE	FALSE	TRUE	IMEx,IntAct	FALSE	0.001	0.001	0.001	0.041	0	0.001	0.001	0.001	0.041	0	0	0	0	0	0	0.014	0.015	0.015	0.055	0	0	0	0	0	0
CPI-SS008F83E02	CCL4_GPRC5D	simple:P13236	simple:Q9NZD1	CCL4	GPRC5D	TRUE	FALSE	TRUE	IMEx,IntAct	FALSE	0.001	0.001	0	0.001	0	0.001	0.001	0	0.001	0	0	0	0	0	0	0.014	0.014	0	0.015	0	0	0	0	0	0
CPI-SS0A3569604	IGF2_IDE	simple:P01344	simple:P14735	IGF2	IDE	TRUE	FALSE	TRUE	I2D,InnateDB-All	FALSE	0.064	0.533	0.163	0.069	0.124	0.068	0.537	0.167	0.073	0.128	0.064	0.534	0.164	0.069	0.124	0.065	0.535	0.165	0.071	0.126	0.066	0.535	0.165	0.071	0.126
CPI-SS076D8415B	CCL3_IDE	simple:P10147	simple:P14735	CCL3	IDE	TRUE	FALSE	TRUE	IMEx,InnateDB-All,MINT	FALSE	0.064	0.533	0.163	0.069	0.124	0	0	0	0	0	0	0	0	0	0	0.07	0.539	0.169	0.075	0.13	0	0	0	0	0
CPI-SS0579FA162	IGF2_IGF1R	simple:P01344	simple:P08069	IGF2	IGF1R	TRUE	FALSE	TRUE	curated	FALSE	0.897	1.87	0.929	0.451	0.913	0.901	1.874	0.933	0.455	0.917	0.897	1.87	0.929	0.452	0.913	0.899	1.871	0.931	0.453	0.914	0.899	1.872	0.931	0.453	0.915
CPI-SS0E41702C1	IGF1_IGF1R	simple:P05019	simple:P08069	IGF1	IGF1R	TRUE	FALSE	TRUE	curated	FALSE	0.9	1.873	0.932	0.455	0.916	1.017	1.989	1.049	0.571	1.033	0.911	1.884	0.943	0.465	0.927	0.914	1.887	0.946	0.468	0.93	0.926	1.899	0.958	0.48	0.942
CPI-SS042A6F835	IGF2_IGF2R	simple:P01344	simple:P11717	IGF2	IGF2R	TRUE	FALSE	TRUE	curated	FALSE	0.034	0.486	0.077	0.03	0.117	0.038	0.489	0.081	0.034	0.121	0.034	0.486	0.078	0.03	0.117	0.035	0.487	0.079	0.032	0.118	0.036	0.487	0.079	0.032	0.119
CPI-SS0BA601DC4	BDNF_NTRK2	simple:P23560	simple:Q16620	BDNF	NTRK2	TRUE	FALSE	TRUE	curated	FALSE	0.085	3.071	1.284	0.19	1.178	0.194	3.18	1.392	0.298	1.286	0.099	3.085	1.297	0.203	1.191	0.084	3.07	1.282	0.188	1.176	0.099	3.085	1.298	0.204	1.192
CPI-SS093E05DD4	NTF3_NTRK2	simple:P20783	simple:Q16620	NTF3	NTRK2	TRUE	FALSE	TRUE	curated	FALSE	0	0	0	0	0	0.085	3.071	1.283	0.189	1.177	0	0	0	0	0	0	0	0	0	0	0	0	0	0	0
CPI-SS088C1035B	NTF4_NTRK2	simple:P34130	simple:Q16620	NTF4	NTRK2	TRUE	FALSE	TRUE	I2D,IMEx,InnateDB-All,IntAct	FALSE	0	0	0	0	0	0.08	3.066	1.278	0.185	1.173	0	0	0	0	0	0	0	0	0	0	0	0	0	0	0
CPI-SS09A36B221	BDNF_SORT1	simple:P23560	simple:Q99523	BDNF	SORT1	TRUE	FALSE	TRUE	I2D,IMEx,InnateDB-All,IntAct	FALSE	0.526	0.818	0.248	0.345	0.139	0.635	0.927	0.357	0.453	0.248	0.539	0.832	0.262	0.358	0.152	0.525	0.817	0.247	0.343	0.138	0.54	0.832	0.262	0.359	0.153
CPI-SS07CCAD9BF	GRN_SORT1	simple:P28799	simple:Q99523	GRN	SORT1	TRUE	FALSE	TRUE	IMEx,InnateDB-All,MINT	FALSE	0.536	0.828	0.259	0.355	0.149	0.574	0.866	0.296	0.392	0.187	0.545	0.837	0.267	0.364	0.158	0.728	1.02	0.45	0.546	0.341	0.55	0.842	0.272	0.368	0.163
CPI-SS04F3A1E5C	COPA_SORT1	simple:P53621	simple:Q99523	COPA	SORT1	TRUE	FALSE	TRUE	IMEx,InnateDB-All,IntAct,MatrixDB	FALSE	0.654	0.946	0.376	0.473	0.267	1.092	1.384	0.814	0.91	0.704	0.728	1.021	0.451	0.547	0.341	0.685	0.977	0.407	0.504	0.298	0.732	1.024	0.454	0.55	0.345
CPI-SS03F0B666C	BDNF_F11R	simple:P23560	simple:Q9Y624	BDNF	F11R	TRUE	FALSE	TRUE	IMEx,InnateDB-All,IntAct	FALSE	0.01	0.018	0.017	0.307	0.01	0.118	0.127	0.126	0.415	0.119	0.023	0.031	0.03	0.32	0.024	0.008	0.017	0.016	0.305	0.009	0.024	0.032	0.031	0.321	0.024
CPI-SC0D089F0A9	IFNK_Type I IFNR	simple:Q9P0W0	complex:Type I IFNR	IFNK		TRUE	FALSE	TRUE	curated	FALSE	0.026	0.117	0.041	0.093	0.09	0.024	0.116	0.04	0.092	0.088	0.025	0.116	0.04	0.092	0.089	0	0	0	0	0	0	0	0	0	0
CPI-SS04465565A	PROK1_PROKR2	simple:P58294	simple:Q8NFJ6	PROK1	PROKR2	TRUE	FALSE	TRUE	guidetopharmacology.org	FALSE	0	0.002	0.002	0	0	0.002	0.004	0.004	0	0	0.002	0.003	0.004	0	0	0	0	0	0	0	0	0	0	0	0
CPI-SS02A0FF87F	FAM3C_CLEC2D	simple:Q92520	simple:Q9UHP7	FAM3C	CLEC2D	TRUE	FALSE	TRUE	IMEx,InnateDB-All,IntAct	FALSE	0	0.025	0	0.025	0	0	0.178	0	0.178	0	0	0.059	0	0.059	0	0	0.07	0	0.07	0	0	0.245	0	0.245	0
CPI-SS0471FCFF3	GAL_GPR151	simple:P22466	simple:Q8TDV0	GAL	GPR151	TRUE	FALSE	TRUE	I2D	FALSE	0	0.004	0	0	0	0	0.032	0	0	0	0	0.003	0	0	0	0	0.002	0	0	0	0	0.005	0	0	0
CPI-SS0F8EFEECF	TNF_DAG1	simple:P01375	simple:Q14118	TNF	DAG1	TRUE	FALSE	TRUE	InnateDB-All	FALSE	0	0	0	0	0	0	0	0	0	0	0	0	0	0	0	0.046	0.492	0.236	0.079	0.248	0	0	0	0	0
CPI-SS02EBC1BB0	TNF_NOTCH1	simple:P01375	simple:P46531	TNF	NOTCH1	TRUE	FALSE	TRUE	I2D	FALSE	0	0	0	0	0	0	0	0	0	0	0	0	0	0	0	0.018	0.028	0.288	0.046	0.183	0	0	0	0	0
CPI-SS04A5D6B6F	DLL1_NOTCH1	simple:O00548	simple:P46531	DLL1	NOTCH1	FALSE	FALSE	TRUE	curated	FALSE	0.011	0.02	0.281	0.039	0.176	0.031	0.041	0.301	0.059	0.196	0.014	0.024	0.284	0.043	0.179	0.009	0.019	0.28	0.038	0.175	0.056	0.066	0.326	0.084	0.221
CPI-SS0B81F1BF5	TNF_SEMA4C	simple:P01375	simple:Q9C0C4	TNF	SEMA4C	TRUE	FALSE	TRUE	InnateDB-All	FALSE	0	0	0	0	0	0	0	0	0	0	0	0	0	0	0	0.03	0.041	0.024	0.038	0.035	0	0	0	0	0
CPI-SS0AB21032D	PLXNB2_SEMA4C	simple:O15031	simple:Q9C0C4	PLXNB2	SEMA4C	FALSE	TRUE	TRUE	curated	FALSE	0.021	0.033	0.015	0.03	0.027	0.087	0.099	0.081	0.095	0.092	0.045	0.056	0.039	0.053	0.05	0.135	0.147	0.129	0.144	0.141	0.06	0.072	0.054	0.069	0.066
CPI-SS09C917D22	TNF_FLT4	simple:P01375	simple:P35916	TNF	FLT4	TRUE	FALSE	TRUE	InnateDB-All	FALSE	0	0	0	0	0	0	0	0	0	0	0	0	0	0	0	0.017	0.037	0.018	0.018	0.018	0	0	0	0	0
CPI-SS0D883FFF1	VEGFD_FLT4	simple:O43915	simple:P35916	VEGFD	FLT4	TRUE	FALSE	TRUE	curated	FALSE	0.009	0.029	0.01	0.009	0.01	0.047	0.067	0.048	0.048	0.048	0.025	0.045	0.026	0.026	0.026	0.008	0.028	0.009	0.008	0.009	0	0	0	0	0
CPI-SS04B4619D0	TNF_TNFRSF1A	simple:P01375	simple:P19438	TNF	TNFRSF1A	TRUE	FALSE	TRUE	curated	FALSE	0	0	0	0	0	0	0	0	0	0	0	0	0	0	0	0.014	0.016	0.05	0.037	0.035	0	0	0	0	0
CPI-SS084BE3E4B	LTA_TNFRSF1A	simple:P01374	simple:P19438	LTA	TNFRSF1A	TRUE	FALSE	TRUE	curated	FALSE	0.002	0.003	0.037	0.024	0.022	0.003	0.004	0.038	0.026	0.024	0.002	0.003	0.037	0.025	0.023	0	0	0	0	0	0	0	0	0	0
CPI-SS0F9B3B259	TNFSF13_TNFRSF1A	simple:O75888	simple:P19438	TNFSF13	TNFRSF1A	TRUE	FALSE	TRUE	I2D,InnateDB-All	FALSE	0.002	0.004	0.038	0.025	0.023	0.013	0.014	0.048	0.036	0.034	0.005	0.006	0.04	0.028	0.025	0.003	0.004	0.039	0.026	0.024	0	0	0	0	0
CPI-SS08B7D54A3	TNF_FAS	simple:P01375	simple:P25445	TNF	FAS	TRUE	FALSE	TRUE	InnateDB-All	FALSE	0	0	0	0	0	0	0	0	0	0	0	0	0	0	0	0.013	0.015	0.035	0.016	0.02	0	0	0	0	0
CPI-SS0A83A7E30	TNFSF13_FAS	simple:O75888	simple:P25445	TNFSF13	FAS	TRUE	FALSE	TRUE	I2D,InnateDB-All	FALSE	0.001	0.003	0.023	0.004	0.008	0.012	0.014	0.034	0.014	0.019	0.004	0.006	0.025	0.006	0.011	0.002	0.004	0.024	0.005	0.009	0	0	0	0	0
CPI-SS0E7D5974D	TNF_TNFRSF1B	simple:P01375	simple:P20333	TNF	TNFRSF1B	TRUE	FALSE	TRUE	curated	FALSE	0	0	0	0	0	0	0	0	0	0	0	0	0	0	0	0.014	0.029	0.015	0.111	0.018	0	0	0	0	0
CPI-SS07D9A48A2	LTA_TNFRSF1B	simple:P01374	simple:P20333	LTA	TNFRSF1B	TRUE	FALSE	TRUE	curated	FALSE	0.001	0.016	0.002	0.099	0.005	0.003	0.018	0.004	0.1	0.007	0.002	0.017	0.003	0.099	0.006	0	0	0	0	0	0	0	0	0	0
CPI-SS048A2311A	TNF_RIPK1	simple:P01375	simple:Q13546	TNF	RIPK1	TRUE	FALSE	TRUE	I2D,IMEx,InnateDB,InnateDB-All,IntAct,MINT	FALSE	0	0	0	0	0	0	0	0	0	0	0	0	0	0	0	0.06	0.082	0.073	0.071	0.113	0	0	0	0	0
CPI-SS0D5C54214	LTA_RIPK1	simple:P01374	simple:Q13546	LTA	RIPK1	TRUE	FALSE	TRUE	IMEx,InnateDB-All,MINT	FALSE	0.047	0.069	0.06	0.059	0.1	0.048	0.071	0.062	0.06	0.101	0.047	0.07	0.061	0.059	0.1	0	0	0	0	0	0	0	0	0	0
CPI-SS0DEDA3567	TNFSF10_RIPK1	simple:P50591	simple:Q13546	TNFSF10	RIPK1	TRUE	FALSE	TRUE	InnateDB-All	FALSE	0.047	0.069	0.06	0.059	0.1	0.049	0.072	0.062	0.061	0.102	0.048	0.071	0.061	0.06	0.101	0.057	0.079	0.07	0.069	0.11	0	0	0	0	0
CPI-SS0FBC9234C	TNF_PTPRS	simple:P01375	simple:Q13332	TNF	PTPRS	TRUE	FALSE	TRUE	InnateDB-All	FALSE	0	0	0	0	0	0	0	0	0	0	0	0	0	0	0	0.1	1.846	0.36	0.183	0.763	0	0	0	0	0
CPI-SS00F4DDF4B	PTN_PTPRS	simple:P21246	simple:Q13332	PTN	PTPRS	TRUE	FALSE	TRUE	I2D,IMEx,InnateDB-All,IntAct	FALSE	0.682	2.428	0.942	0.765	1.345	0.654	2.401	0.914	0.737	1.317	0.331	2.077	0.591	0.414	0.994	0.213	1.96	0.473	0.296	0.876	1.249	2.996	1.51	1.332	1.913
CPI-SS034B442CE	TNF_CELSR2	simple:P01375	simple:Q9HCU4	TNF	CELSR2	TRUE	FALSE	TRUE	InnateDB-All	FALSE	0	0	0	0	0	0	0	0	0	0	0	0	0	0	0	0.038	0.264	0.102	0.038	0.074	0	0	0	0	0
CPI-SS0EA96C304	CCK_CCKAR	simple:P06307	simple:P32238	CCK	CCKAR	TRUE	FALSE	TRUE	guidetopharmacology.org	FALSE	0	0.01	0.009	0	0	0	0.057	0.056	0	0	0	0.015	0.014	0	0	0	0.011	0.01	0	0	0	0.014	0.013	0	0
CPI-SS056BE1011	CCRL2_CCL19	simple:O00421	simple:Q99731	CCRL2	CCL19	TRUE	TRUE	FALSE	guidetopharmacology.org	FALSE	0	0	0	0	0	0	0.001	0	0	0	0	0.002	0	0	0	0	0.003	0	0	0	0	0.003	0	0	0
CPI-SS0DBA4D668	DPP4_CXCL12	simple:P27487	simple:P48061	DPP4	CXCL12	TRUE	TRUE	FALSE	curated	FALSE	0.004	0.011	0	0.004	0	0.029	0.037	0	0.029	0	0.003	0.011	0	0.003	0	0.006	0.013	0	0.006	0	0.007	0.014	0	0.007	0
CPI-SS07155793F	ACKR3_CXCL12	simple:P25106	simple:P48061	ACKR3	CXCL12	TRUE	TRUE	FALSE	guidetopharmacology.org	FALSE	0.003	0.01	0	0.003	0	0.009	0.016	0	0.009	0	0.026	0.034	0	0.027	0	0	0	0	0	0	0.038	0.046	0	0.038	0
CPI-SS0DCA69916	TNFRSF13B_TNFSF13	simple:O14836	simple:O75888	TNFRSF13B	TNFSF13	TRUE	TRUE	FALSE	curated	FALSE	0.001	0.012	0.004	0.002	0	0.003	0.013	0.005	0.004	0	0	0	0	0	0	0.042	0.052	0.044	0.043	0	0.004	0.014	0.006	0.004	0
CPI-SS0AA47D179	TNFRSF13B_CD70	simple:O14836	simple:P32970	TNFRSF13B	CD70	TRUE	TRUE	FALSE	InnateDB-All	FALSE	0	0.002	0	0.002	0.01	0.002	0.003	0	0.004	0.011	0	0	0	0	0	0.041	0.042	0	0.043	0.051	0.003	0.004	0	0.004	0.012
CPI-SS0D4BF6CA3	CD27_CD70	simple:P26842	simple:P32970	CD27	CD70	TRUE	TRUE	FALSE	curated	FALSE	0.011	0.012	0	0.013	0.02	0.025	0.026	0	0.026	0.034	0.047	0.048	0	0.048	0.056	0.028	0.029	0	0.03	0.038	0.007	0.009	0	0.009	0.017
CPI-CS06072FF4E	IL1 receptor_IL1A	complex:IL1 receptor	simple:P01583		IL1A	TRUE	TRUE	FALSE	curated	FALSE	0.001	0.001	0.002	0.051	0	0.018	0.019	0.02	0.068	0	0	0	0	0	0	0.009	0.01	0.011	0.059	0	0	0	0	0	0
CPI-CS0AC5142FA	IL1 receptor inhibitor_IL1A	complex:IL1 receptor inhibitor	simple:P01583		IL1A	TRUE	TRUE	FALSE	curated	FALSE	0.011	0.011	0.012	0.061	0	0.091	0.091	0.092	0.141	0	0.009	0.01	0.011	0.059	0	0.011	0.011	0.013	0.061	0	0.024	0.025	0.026	0.074	0
CPI-CS05426BFFA	IL1 receptor_IL1B	complex:IL1 receptor	simple:P01584		IL1B	TRUE	TRUE	FALSE	curated	FALSE	0	0.001	0	0.004	0	0	0.018	0	0.022	0	0	0	0	0	0	0	0.01	0	0.013	0	0	0	0	0	0
CPI-CS008C9D6E5	IL1 receptor inhibitor_IL1B	complex:IL1 receptor inhibitor	simple:P01584		IL1B	TRUE	TRUE	FALSE	curated	FALSE	0	0.011	0	0.015	0	0	0.091	0	0.095	0	0	0.009	0	0.013	0	0	0.011	0	0.015	0	0	0.025	0	0.028	0
CPI-CS04CBDE052	IL10 receptor_IL10	complex:IL10 receptor	simple:P22301		IL10	TRUE	TRUE	FALSE	curated	FALSE	0.001	0.004	0	0	0	0.009	0.013	0	0	0	0.011	0.015	0	0	0	0.114	0.118	0	0	0	0.003	0.006	0	0	0
CPI-CS00BF6CD40	IL13 receptor_IL4	complex:IL13 receptor	simple:P05112		IL4	TRUE	TRUE	FALSE	curated	FALSE	0.009	0.05	0.007	0	0.013	0.021	0.063	0.02	0	0.025	0.012	0.054	0.011	0	0.016	0.07	0.112	0.068	0	0.074	0.018	0.059	0.016	0	0.022
CPI-CS0FBBCDD66	IL4 receptor_IL4	complex:IL4 receptor	simple:P05112		IL4	TRUE	TRUE	FALSE	curated	FALSE	0.008	0.05	0.006	0	0.012	0.009	0.05	0.007	0	0.013	0	0	0	0	0	0.011	0.052	0.009	0	0.015	0	0	0	0	0
CPI-CS045D41398	IL17 receptor AB_IL25	complex:IL17 receptor AB	simple:Q9H293		IL25	TRUE	TRUE	FALSE	curated	FALSE	0.013	0.013	0.013	0	0	0.008	0.008	0.008	0	0	0.009	0.01	0.01	0	0	0.007	0.007	0.007	0	0	0.007	0.008	0.008	0	0
CPI-CS0BA342294	IL17 receptor AE_IL17C	complex:IL17 receptor AE	simple:Q9P0M4		IL17C	TRUE	TRUE	FALSE	curated	FALSE	0.001	0.002	0.002	0.013	0	0.008	0.009	0.009	0.02	0	0.001	0.002	0.002	0.013	0	0	0	0	0	0	0.003	0.003	0.004	0.014	0
CPI-SS09F430F14	NGFR_IL2	simple:P08138	simple:P60568	NGFR	IL2	TRUE	TRUE	FALSE	I2D	FALSE	0.004	0.005	0	0.004	0	0.003	0.004	0	0.004	0	0	0	0	0	0	0.001	0.002	0	0.002	0	0	0	0	0	0
CPI-SS0A93C11C8	NGFR_BDNF	simple:P08138	simple:P23560	NGFR	BDNF	TRUE	TRUE	FALSE	curated	FALSE	0.011	0.12	0.024	0.01	0.025	0.011	0.119	0.024	0.009	0.025	0	0	0	0	0	0.009	0.117	0.022	0.007	0.023	0	0	0	0	0
CPI-SS01BCB9360	NCAM1_BDNF	simple:P13591	simple:P23560	NCAM1	BDNF	TRUE	TRUE	FALSE	I2D	FALSE	2.476	2.585	2.49	2.475	2.49	3.653	3.761	3.666	3.651	3.667	3.417	3.526	3.43	3.416	3.431	0.518	0.627	0.531	0.517	0.532	3.316	3.425	3.329	3.315	3.33
CPI-SS0BA3A1C3A	NGFR_NTF4	simple:P08138	simple:P34130	NGFR	NTF4	TRUE	TRUE	FALSE	curated	FALSE	0	0.006	0	0	0	0	0.005	0	0	0	0	0	0	0	0	0	0.004	0	0	0	0	0	0	0	0
CPI-SS0C23EF34B	NCAM1_GDNF	simple:P13591	simple:P39905	NCAM1	GDNF	TRUE	TRUE	FALSE	I2D	FALSE	2.469	2.473	0	0	0	3.645	3.65	0	0	0	3.409	3.414	0	0	0	0.51	0.515	0	0	0	3.308	3.313	0	0	0
CPI-CS0645666B0	IL20 receptor Type I_IL19	complex:IL20 receptor Type I	simple:Q9UHD0		IL19	TRUE	TRUE	FALSE	curated	FALSE	0	0.002	0	0	0	0.007	0.008	0	0	0	0.001	0.002	0	0	0	0.001	0.002	0	0	0	0	0	0	0	0
CPI-SS027CDEA08	NOTCH2_DLL4	simple:Q04721	simple:Q9NR61	NOTCH2	DLL4	FALSE	TRUE	FALSE	curated	FALSE	0.023	0.025	0	0	0	0.08	0.082	0	0	0	0.403	0.406	0	0	0	0.244	0.247	0	0	0	0.044	0.047	0	0	0
CPI-SS012B7C21D	NOTCH1_DLL4	simple:P46531	simple:Q9NR61	NOTCH1	DLL4	FALSE	TRUE	FALSE	curated	FALSE	0.006	0.008	0	0	0	0.015	0.018	0	0	0	0.276	0.279	0	0	0	0.034	0.037	0	0	0	0.171	0.173	0	0	0
CPI-SS003C9A532	NOTCH2_DLL3	simple:Q04721	simple:Q9NYJ7	NOTCH2	DLL3	FALSE	TRUE	FALSE	curated	FALSE	0.022	0.027	0.023	0	0.046	0.079	0.084	0.08	0	0.103	0.403	0.408	0.404	0	0.427	0.243	0.249	0.244	0	0.267	0.044	0.049	0.045	0	0.068
CPI-SS0607D1101	NOTCH1_DLL3	simple:P46531	simple:Q9NYJ7	NOTCH1	DLL3	FALSE	TRUE	FALSE	curated	FALSE	0.005	0.01	0.006	0	0.029	0.015	0.02	0.016	0	0.039	0.275	0.281	0.276	0	0.299	0.034	0.039	0.035	0	0.058	0.17	0.176	0.171	0	0.194
CPI-SS02770D68F	NOTCH2_JAG2	simple:Q04721	simple:Q9Y219	NOTCH2	JAG2	FALSE	TRUE	FALSE	curated	FALSE	0.026	0.172	0.041	0.035	0	0.083	0.229	0.098	0.092	0	0.407	0.553	0.422	0.416	0	0.247	0.393	0.262	0.256	0	0.048	0.194	0.063	0.057	0
CPI-SS08C3D27F7	NOTCH1_JAG2	simple:P46531	simple:Q9Y219	NOTCH1	JAG2	FALSE	TRUE	FALSE	curated	FALSE	0.009	0.155	0.024	0.018	0	0.019	0.165	0.034	0.028	0	0.279	0.425	0.294	0.288	0	0.037	0.184	0.052	0.046	0	0.174	0.32	0.189	0.183	0
CPI-SS0C4D54E39	NOTCH3_JAG2	simple:Q9UM47	simple:Q9Y219	NOTCH3	JAG2	FALSE	TRUE	FALSE	curated	FALSE	0.007	0.153	0.022	0.016	0	0.198	0.344	0.213	0.207	0	0.165	0.311	0.18	0.174	0	0.01	0.157	0.026	0.019	0	0.006	0.153	0.021	0.015	0
CPI-SS0B42AD9EF	NOTCH1_WNT4	simple:P46531	simple:P56705	NOTCH1	WNT4	TRUE	TRUE	FALSE	I2D	FALSE	0.006	0.012	0.009	0.006	0	0.016	0.022	0.019	0.016	0	0.276	0.282	0.279	0.276	0	0.034	0.041	0.038	0.034	0	0.171	0.177	0.174	0.171	0
CPI-SS0FA326344	FZD6_WNT4	simple:O60353	simple:P56705	FZD6	WNT4	TRUE	TRUE	FALSE	curated	FALSE	0.001	0.008	0.005	0.001	0	0.011	0.018	0.015	0.011	0	0.03	0.036	0.033	0.03	0	0.002	0.008	0.005	0.002	0	0.008	0.014	0.012	0.008	0
CPI-SS0B87FE6E0	NOTCH1_JAG1	simple:P46531	simple:P78504	NOTCH1	JAG1	FALSE	TRUE	FALSE	curated	FALSE	0.011	0.02	0.065	0.009	0.07	0.02	0.03	0.075	0.019	0.08	0.281	0.29	0.336	0.28	0.341	0.039	0.048	0.094	0.038	0.099	0.176	0.185	0.231	0.175	0.235
CPI-SS01A07768A	CD46_JAG1	simple:P15529	simple:P78504	CD46	JAG1	FALSE	TRUE	FALSE	curated	FALSE	0.088	0.097	0.143	0.087	0.148	0.478	0.487	0.533	0.477	0.537	0.186	0.196	0.241	0.185	0.246	0.069	0.078	0.124	0.068	0.129	0.066	0.076	0.121	0.065	0.126
CPI-SS0A34EE366	NOTCH1_DLK1	simple:P46531	simple:P80370	NOTCH1	DLK1	FALSE	TRUE	FALSE	curated	FALSE	0.019	0.15	0.024	0.025	0.015	0.029	0.16	0.034	0.035	0.024	0.289	0.421	0.294	0.295	0.285	0.048	0.179	0.052	0.054	0.043	0.184	0.315	0.189	0.19	0.18
CPI-CS0E80B08E2	IL21 receptor_IL21	complex:IL21 receptor	simple:Q9HBE4		IL21	TRUE	TRUE	FALSE	curated	FALSE	0	0.001	0	0	0	0.001	0.001	0	0	0	0	0	0	0	0	0.003	0.003	0	0	0	0	0	0	0	0
CPI-CS0A8A0A053	IL22 receptor_IL22	complex:IL22 receptor	simple:Q9GZX6		IL22	TRUE	TRUE	FALSE	curated	FALSE	0	0.001	0	0	0	0	0.003	0	0	0	0	0.002	0	0	0	0	0.002	0	0	0	0	0	0	0	0
CPI-CC09BCDA08E	IL27_IL27 receptor	complex:IL27	complex:IL27 receptor			TRUE	FALSE	TRUE	curated	FALSE	0	0.004	0.002	0.004	0	0	0.009	0.007	0.009	0	0	0.004	0.002	0.004	0	0	0.02	0.018	0.02	0	0	0	0	0	0
CPI-CS0C59AF029	IL33 receptor_IL33	complex:IL33 receptor	simple:O95760		IL33	TRUE	TRUE	FALSE	curated	FALSE	0.608	0.114	0.327	0.083	0.124	0.608	0.114	0.327	0.083	0.124	0.608	0.114	0.327	0.083	0.124	0.612	0.118	0.331	0.087	0.128	0	0	0	0	0
CPI-CC0C3ECBD1F	IL35_IL35 receptor	complex:IL35	complex:IL35 receptor			TRUE	FALSE	TRUE	curated	FALSE	0.003	0.069	0.013	0.007	0.005	0.004	0.069	0.013	0.007	0.005	0	0	0	0	0	0.004	0.069	0.014	0.007	0.006	0	0	0	0	0
CPI-CS0D9B5AB86	IL36 receptor_IL36G	complex:IL36 receptor	simple:Q9NZH8		IL36G	TRUE	TRUE	FALSE	curated	FALSE	0	0.002	0.001	0	0	0	0.004	0.003	0	0	0	0.003	0.002	0	0	0	0.128	0.127	0	0	0	0	0	0	0
CPI-CS0FB8775FC	IL5 receptor_IL5	complex:IL5 receptor	simple:P05113		IL5	TRUE	TRUE	FALSE	curated	FALSE	0	0	0	0	0	0	0.002	0	0	0	0	0	0	0	0	0	0	0	0	0	0	0	0	0	0
CPI-CS063AE1C91	IL6 receptor_IL6	complex:IL6 receptor	simple:P05231		IL6	TRUE	TRUE	FALSE	curated	FALSE	0.003	0.004	0	0.01	0	0.013	0.015	0	0.021	0	0.012	0.013	0	0.019	0	0.266	0.267	0	0.273	0	0.015	0.017	0	0.022	0
CPI-CS0AB9C7139	IL7 receptor_IL7	complex:IL7 receptor	simple:P13232		IL7	TRUE	TRUE	FALSE	curated	FALSE	0.001	0.012	0.002	0.002	0.003	0.002	0.013	0.002	0.003	0.003	0	0	0	0	0	0.004	0.015	0.004	0.005	0.005	0	0	0	0	0
CPI-CS0E661878B	LIFR_OSM	complex:LIFR	simple:P13725		OSM	TRUE	TRUE	FALSE	curated	FALSE	0	0	0	0.079	0	0	0	0	0.269	0	0	0	0	0.158	0	0	0	0	0.208	0	0	0	0	0.161	0
CPI-CS06D50EBF8	OSMR_OSM	complex:OSMR	simple:P13725		OSM	TRUE	TRUE	FALSE	curated	FALSE	0	0	0	0.004	0	0	0	0	0.005	0	0	0	0	0.006	0	0	0	0	0	0	0	0	0	0	0
CPI-SS030EDC420	FZD9_WNT7A	simple:O00144	simple:O00755	FZD9	WNT7A	TRUE	TRUE	FALSE	I2D	FALSE	0.004	0.006	0.074	0	0.084	0.003	0.005	0.073	0	0.083	0.025	0.026	0.094	0	0.104	0.002	0.004	0.072	0	0.082	0.056	0.058	0.126	0	0.136
CPI-SS05C2D0200	FZD9_WNT1	simple:O00144	simple:P04628	FZD9	WNT1	TRUE	TRUE	FALSE	I2D	FALSE	0.004	0.004	0	0.005	0	0.003	0.003	0	0.004	0	0.024	0.025	0	0.025	0	0.002	0.002	0	0.003	0	0.056	0.056	0	0.057	0
CPI-SS09FF3A1EA	FZD9_WNT2	simple:O00144	simple:P09544	FZD9	WNT2	TRUE	TRUE	FALSE	curated	FALSE	0.004	0.007	0.006	0.006	0	0.003	0.006	0.005	0.005	0	0.024	0.027	0.026	0.026	0	0.002	0.005	0.004	0.004	0	0.056	0.059	0.058	0.058	0
CPI-SS0CF0E4DE9	CCL2_CCR2	simple:P13500	simple:P41597	CCL2	CCR2	TRUE	FALSE	TRUE	curated	FALSE	0	0	0	0	0	0.001	0.002	0.003	0.002	0	0	0	0	0	0	0.002	0.003	0.004	0.004	0	0	0	0	0	0
CPI-SS0DBFB8BEA	CCL2_ACKR1	simple:P13500	simple:Q16570	CCL2	ACKR1	TRUE	FALSE	TRUE	curated	FALSE	0	0	0	0	0	0.005	0.136	0.01	0.006	0.008	0	0	0	0	0	0.006	0.137	0.012	0.007	0.009	0	0	0	0	0
CPI-SS008700E67	CCL8_ACKR1	simple:P80075	simple:Q16570	CCL8	ACKR1	TRUE	FALSE	TRUE	I2D	FALSE	0.004	0.136	0.01	0.006	0.007	0.005	0.136	0.01	0.006	0.008	0	0	0	0	0	0.013	0.144	0.018	0.014	0.016	0	0	0	0	0
CPI-SS08B249DBA	CCL2_CCR10	simple:P13500	simple:P46092	CCL2	CCR10	TRUE	FALSE	TRUE	I2D	FALSE	0	0	0	0	0	0.001	0.005	0.003	0.001	0.003	0	0	0	0	0	0.002	0.007	0.004	0.003	0.004	0	0	0	0	0
CPI-SS00AEC3818	CCL19_ACKR4	simple:Q99731	simple:Q9NPB9	CCL19	ACKR4	TRUE	FALSE	TRUE	curated	FALSE	0	0	0	0	0	0.012	0.204	0.036	0.012	0.022	0	0	0	0	0	0	0	0	0	0	0	0	0	0	0
CPI-SS052B38F1C	CCL22_CCR4	simple:O00626	simple:P51679	CCL22	CCR4	TRUE	FALSE	TRUE	curated	FALSE	0.001	0.005	0.002	0.002	0	0.001	0.004	0.001	0.001	0	0	0	0	0	0	0	0	0	0	0	0.005	0.009	0.006	0.006	0
CPI-SS0AEC33FF1	CCL22_DPP4	simple:O00626	simple:P27487	CCL22	DPP4	TRUE	FALSE	TRUE	curated	FALSE	0.003	0.028	0.002	0.005	0.006	0.002	0.028	0.002	0.004	0.005	0	0	0	0	0	0	0	0	0	0	0.007	0.032	0.006	0.009	0.01
CPI-SS0F9BBC31B	VIP_DPP4	simple:P01282	simple:P27487	VIP	DPP4	TRUE	FALSE	TRUE	InnateDB-All,MINT	FALSE	0.003	0.029	0.003	0.005	0.006	0.014	0.039	0.013	0.015	0.016	0	0	0	0	0	0	0	0	0	0	0	0	0	0	0
CPI-SS0FDAB7BA8	CXCL10_DPP4	simple:P02778	simple:P27487	CXCL10	DPP4	TRUE	FALSE	TRUE	curated	FALSE	0.002	0.028	0.002	0.004	0.005	0.002	0.028	0.002	0.004	0.005	0.003	0.029	0.003	0.005	0.006	0.005	0.03	0.004	0.006	0.008	0	0	0	0	0
CPI-SS0652F5D15	NPPB_DPP4	simple:P16860	simple:P27487	NPPB	DPP4	TRUE	FALSE	TRUE	InnateDB-All,MINT	FALSE	0.002	0.028	0.002	0.004	0.005	0.003	0.028	0.002	0.004	0.006	0	0	0	0	0	0	0	0	0	0	0	0	0	0	0
CPI-SS0D377BBBF	ADCYAP1_DPP4	simple:P18509	simple:P27487	ADCYAP1	DPP4	TRUE	FALSE	TRUE	InnateDB-All,MINT	FALSE	0.007	0.032	0.006	0.008	0.01	0.065	0.091	0.065	0.067	0.068	0.006	0.031	0.005	0.007	0.008	0.008	0.033	0.007	0.009	0.01	0	0	0	0	0
CPI-SS015B2F961	CALCA_CALCR	simple:P01258	simple:P30988	CALCA	CALCR	TRUE	FALSE	TRUE	guidetopharmacology.org	FALSE	0.004	0.008	0.006	0	0	0.023	0.028	0.025	0	0	0.007	0.011	0.009	0	0	0.004	0.008	0.006	0	0	0.007	0.011	0.009	0	0
CPI-SS0F531DDEB	CALCA_CALCR	simple:P06881	simple:P30988	CALCA	CALCR	TRUE	FALSE	TRUE	guidetopharmacology.org	FALSE	0.004	0.008	0.006	0	0	0.023	0.028	0.025	0	0	0.007	0.011	0.009	0	0	0.004	0.008	0.006	0	0	0.007	0.011	0.009	0	0
CPI-SS07CF0C6E7	CALCB_CALCR	simple:P10092	simple:P30988	CALCB	CALCR	TRUE	FALSE	TRUE	guidetopharmacology.org	FALSE	0.003	0.008	0.005	0	0	0.03	0.035	0.032	0	0	0.004	0.008	0.006	0	0	0.004	0.008	0.006	0	0	0.003	0.007	0.005	0	0
CPI-SS07835EECF	VIP_AVPR1A	simple:P01282	simple:P37288	VIP	AVPR1A	TRUE	FALSE	TRUE	IMEx,IntAct	FALSE	0.001	0.004	0	0	0	0.012	0.014	0	0	0	0	0	0	0	0	0	0	0	0	0	0	0	0	0	0
CPI-SS0C8A09915	VIP_VIPR1	simple:P01282	simple:P32241	VIP	VIPR1	TRUE	FALSE	TRUE	guidetopharmacology.org	FALSE	0	0.011	0.002	0.006	0	0	0.021	0.012	0.016	0	0	0	0	0	0	0	0	0	0	0	0	0	0	0	0
CPI-SS062DED513	ADCYAP1_VIPR1	simple:P18509	simple:P32241	ADCYAP1	VIPR1	TRUE	FALSE	TRUE	I2D	FALSE	0	0.014	0.005	0.009	0	0	0.072	0.064	0.068	0	0	0.013	0.004	0.008	0	0	0.015	0.006	0.01	0	0	0	0	0	0
CPI-SS003AFD9BA	GHRH_VIPR1	simple:P01286	simple:P32241	GHRH	VIPR1	TRUE	FALSE	TRUE	guidetopharmacology.org	FALSE	0	0	0	0	0	0	0.011	0.003	0.007	0	0	0.013	0.004	0.008	0	0	0	0	0	0	0	0	0	0	0
CPI-SS0EC70F078	SCT_VIPR1	simple:P09683	simple:P32241	SCT	VIPR1	TRUE	FALSE	TRUE	I2D,InnateDB-All	FALSE	0	0.009	0.001	0.005	0	0	0.011	0.002	0.006	0	0	0	0	0	0	0	0	0	0	0	0	0	0	0	0
CPI-SS05B60E59C	VIP_VIPR2	simple:P01282	simple:P41587	VIP	VIPR2	TRUE	FALSE	TRUE	I2D	FALSE	0.003	0.021	0.005	0.003	0.059	0.013	0.032	0.016	0.013	0.07	0	0	0	0	0	0	0	0	0	0	0	0	0	0	0
CPI-SS02CCE14A7	ADCYAP1_VIPR2	simple:P18509	simple:P41587	ADCYAP1	VIPR2	TRUE	FALSE	TRUE	I2D	FALSE	0.006	0.025	0.009	0.007	0.063	0.065	0.083	0.067	0.065	0.121	0.005	0.024	0.008	0.005	0.062	0.007	0.026	0.01	0.007	0.064	0	0	0	0	0
CPI-SS023D39112	NPPB_NPR3	simple:P16860	simple:P17342	NPPB	NPR3	TRUE	FALSE	TRUE	I2D,InnateDB-All	FALSE	0.002	0.016	0.001	0.001	0	0.002	0.016	0.001	0.002	0	0	0	0	0	0	0	0	0	0	0	0	0	0	0	0
CPI-SS04A7BCE8D	NPPA_NPR3	simple:P01160	simple:P17342	NPPA	NPR3	TRUE	FALSE	TRUE	I2D,InnateDB-All	FALSE	0.004	0.018	0.003	0.003	0	0.025	0.039	0.024	0.024	0	0.006	0.02	0.005	0.005	0	0	0	0	0	0	0.009	0.023	0.008	0.008	0
CPI-SS0779676D0	NPPB_NPR2	simple:P16860	simple:P20594	NPPB	NPR2	TRUE	FALSE	TRUE	I2D,InnateDB-All	FALSE	0.006	0.166	0.074	0.015	0.046	0.006	0.166	0.075	0.016	0.047	0	0	0	0	0	0	0	0	0	0	0	0	0	0	0
CPI-SS0230EE330	NPPA_NPR2	simple:P01160	simple:P20594	NPPA	NPR2	TRUE	FALSE	TRUE	I2D,InnateDB-All	FALSE	0.008	0.168	0.076	0.017	0.048	0.029	0.189	0.098	0.038	0.07	0.01	0.17	0.078	0.019	0.05	0	0	0	0	0	0.013	0.173	0.081	0.022	0.053
CPI-SS0098B5107	ADCYAP1_SCTR	simple:P18509	simple:P47872	ADCYAP1	SCTR	TRUE	FALSE	TRUE	I2D,InnateDB-All	FALSE	0	0.006	0.011	0.007	0	0	0.065	0.069	0.066	0	0	0.005	0.01	0.006	0	0	0.007	0.012	0.008	0	0	0	0	0	0
CPI-SS021F26C73	SCT_SCTR	simple:P09683	simple:P47872	SCT	SCTR	TRUE	FALSE	TRUE	guidetopharmacology.org	FALSE	0	0.002	0.006	0.003	0	0	0.003	0.008	0.004	0	0	0	0	0	0	0	0	0	0	0	0	0	0	0	0
CPI-SS0133239EA	ADCYAP1_ADCYAP1R1	simple:P18509	simple:P41586	ADCYAP1	ADCYAP1R1	TRUE	FALSE	TRUE	I2D,IMEx	FALSE	0.018	0.352	0.177	0.024	0.281	0.076	0.41	0.235	0.083	0.34	0.017	0.35	0.176	0.023	0.28	0.019	0.352	0.178	0.025	0.282	0	0	0	0	0
CPI-SS02928C71A	PDGFB_LRP1	simple:P01127	simple:Q07954	PDGFB	LRP1	TRUE	FALSE	TRUE	I2D,InnateDB-All	FALSE	0.025	0.602	0.902	0.406	1.061	0.079	0.657	0.956	0.461	1.115	0.027	0.605	0.904	0.408	1.063	0.227	0.805	1.104	0.609	1.263	0.027	0.605	0.904	0.408	1.063
CPI-SS006C6537E	MDK_LRP1	simple:P21741	simple:Q07954	MDK	LRP1	TRUE	FALSE	TRUE	I2D,InnateDB-All	FALSE	0.025	0.602	0.902	0.406	1.061	0.032	0.61	0.909	0.414	1.068	0.068	0.645	0.944	0.449	1.103	0.027	0.604	0.904	0.408	1.063	0.047	0.624	0.923	0.428	1.083
CPI-SS0984C2931	WNT3A_LRP1	simple:P56704	simple:Q07954	WNT3A	LRP1	TRUE	FALSE	TRUE	I2D	FALSE	0.023	0.6	0.899	0.404	1.058	0.023	0.6	0.9	0.404	1.059	0	0	0	0	0	0.023	0.601	0.9	0.404	1.059	0	0	0	0	0
CPI-SS0472C478C	BMP7_PTPRK	simple:P18075	simple:Q15262	BMP7	PTPRK	TRUE	FALSE	TRUE	InnateDB-All	FALSE	1.74	1.032	0.329	0.267	1.541	1.755	1.047	0.345	0.282	1.556	1.764	1.056	0.354	0.292	1.566	1.742	1.034	0.331	0.269	1.543	1.81	1.102	0.4	0.338	1.612
CPI-SS0CB863B46	WNT5A_PTPRK	simple:P41221	simple:Q15262	WNT5A	PTPRK	TRUE	FALSE	TRUE	InnateDB-All	FALSE	1.743	1.035	0.333	0.27	1.544	1.802	1.094	0.391	0.329	1.603	1.762	1.054	0.351	0.289	1.563	1.743	1.035	0.333	0.271	1.545	1.747	1.039	0.337	0.274	1.549
CPI-SS083CBFACD	MDK_SORL1	simple:P21741	simple:Q92673	MDK	SORL1	TRUE	FALSE	TRUE	InnateDB-All	FALSE	0.271	1.151	0.701	0.236	0.109	0.279	1.158	0.708	0.244	0.117	0.314	1.193	0.743	0.279	0.152	0.274	1.153	0.703	0.238	0.111	0.293	1.173	0.722	0.258	0.131
CPI-SS05A26A1DE	PDGFB_PDGFRB	simple:P01127	simple:P09619	PDGFB	PDGFRB	TRUE	FALSE	TRUE	curated	FALSE	0.003	0.017	0.081	0.005	0	0.058	0.071	0.136	0.06	0	0.006	0.019	0.084	0.008	0	0.206	0.219	0.284	0.208	0	0.006	0.019	0.084	0.008	0
CPI-SS0FEEB187C	PDGFB_PDGFRA	simple:P01127	simple:P16234	PDGFB	PDGFRA	TRUE	FALSE	TRUE	curated	FALSE	0.01	0.024	0.015	0.01	2.495	0.065	0.079	0.07	0.064	2.55	0.013	0.026	0.018	0.012	2.498	0.213	0.226	0.218	0.212	2.698	0.013	0.026	0.018	0.012	2.498
CPI-SS0B70EB09E	PDGFA_PDGFRA	simple:P04085	simple:P16234	PDGFA	PDGFRA	TRUE	FALSE	TRUE	curated	FALSE	0.076	0.089	0.081	0.075	2.561	0.138	0.152	0.143	0.138	2.623	0.04	0.054	0.045	0.04	2.525	0.036	0.049	0.041	0.035	2.521	0.066	0.08	0.071	0.066	2.551
CPI-SC033E22B14	PDGFB_PDGFR complex	simple:P01127	complex:PDGFR complex	PDGFB		TRUE	FALSE	TRUE	curated	FALSE	0.003	0.017	0.015	0.005	0	0.058	0.071	0.07	0.06	0	0.006	0.019	0.018	0.008	0	0.206	0.219	0.218	0.208	0	0.006	0.019	0.018	0.008	0
CPI-SS0CB4F2FE4	PDGFB_ADGRV1	simple:P01127	simple:Q8WXG9	PDGFB	ADGRV1	TRUE	FALSE	TRUE	InnateDB-All	FALSE	0.088	0.256	0.069	0.017	0.143	0.143	0.311	0.123	0.072	0.198	0.09	0.258	0.071	0.02	0.146	0.29	0.459	0.271	0.22	0.346	0.09	0.258	0.071	0.02	0.146
CPI-SS027E12A36	MDK_PTPRZ1	simple:P21741	simple:P23471	MDK	PTPRZ1	TRUE	FALSE	FALSE	curated	FALSE	0.037	0.425	2.581	0.037	5.265	0.045	0.433	2.588	0.044	5.272	0.08	0.468	2.623	0.079	5.307	0.039	0.427	2.583	0.039	5.267	0.059	0.447	2.603	0.059	5.286
CPI-SS04E690D72	PTN_PTPRZ1	simple:P21246	simple:P23471	PTN	PTPRZ1	TRUE	FALSE	FALSE	curated	FALSE	0.629	1.017	3.173	0.629	5.857	0.602	0.99	3.146	0.602	5.829	0.279	0.667	2.822	0.278	5.506	0.161	0.549	2.704	0.16	5.388	1.197	1.585	3.741	1.197	6.425
CPI-SS012AFC842	MDK_ALK	simple:P21741	simple:Q9UM73	MDK	ALK	TRUE	FALSE	TRUE	curated	FALSE	0.086	1.549	0.191	0.08	0.806	0.094	1.556	0.198	0.087	0.813	0.129	1.591	0.233	0.122	0.849	0.088	1.551	0.193	0.082	0.808	0.108	1.57	0.213	0.101	0.828
CPI-SS05D7900BF	PTN_ALK	simple:P21246	simple:Q9UM73	PTN	ALK	TRUE	FALSE	TRUE	curated	FALSE	0.679	2.141	0.783	0.672	1.398	0.651	2.113	0.756	0.644	1.371	0.328	1.79	0.432	0.321	1.047	0.21	1.672	0.314	0.203	0.93	1.246	2.709	1.351	1.24	1.966
CPI-SS048604E28	WNT3A_FZD8	simple:P56704	simple:Q9H461	WNT3A	FZD8	TRUE	FALSE	TRUE	IMEx,IntAct	FALSE	0.002	0.01	0.009	0.003	0	0.002	0.011	0.009	0.003	0	0	0	0	0	0	0.003	0.011	0.009	0.004	0	0	0	0	0	0
CPI-SS0193C3064	WNT1_FZD8	simple:P04628	simple:Q9H461	WNT1	FZD8	TRUE	FALSE	TRUE	I2D,InnateDB-All	FALSE	0.002	0.01	0.009	0.003	0	0.002	0.011	0.009	0.003	0	0	0	0	0	0	0.003	0.011	0.009	0.004	0	0	0	0	0	0
CPI-SS0D782F60B	WNT4_FZD8	simple:P56705	simple:Q9H461	WNT4	FZD8	TRUE	FALSE	TRUE	I2D	FALSE	0.003	0.011	0.009	0.004	0	0.009	0.017	0.016	0.01	0	0.006	0.014	0.013	0.007	0	0.003	0.011	0.009	0.004	0	0	0	0	0	0
CPI-SS080C0EEB8	WNT3A_FZD1	simple:P56704	simple:Q9UP38	WNT3A	FZD1	TRUE	FALSE	TRUE	I2D,InnateDB-All	FALSE	0.001	0.004	0.037	0	0.015	0.002	0.004	0.037	0	0.015	0	0	0	0	0	0.002	0.004	0.038	0	0.015	0	0	0	0	0
CPI-SS0B2D5BA95	WNT5A_FZD1	simple:P41221	simple:Q9UP38	WNT5A	FZD1	TRUE	FALSE	TRUE	curated	FALSE	0.004	0.007	0.04	0	0.018	0.063	0.065	0.099	0	0.077	0.023	0.025	0.059	0	0.036	0.005	0.007	0.04	0	0.018	0.008	0.011	0.044	0	0.022
CPI-SS0DC5ADBF1	WNT1_FZD1	simple:P04628	simple:Q9UP38	WNT1	FZD1	TRUE	FALSE	TRUE	curated	FALSE	0.001	0.003	0.037	0	0.015	0.002	0.004	0.037	0	0.015	0	0	0	0	0	0.002	0.004	0.038	0	0.015	0	0	0	0	0
CPI-SS0CA020C34	WNT4_FZD1	simple:P56705	simple:Q9UP38	WNT4	FZD1	TRUE	FALSE	TRUE	I2D	FALSE	0.002	0.004	0.038	0	0.016	0.008	0.011	0.044	0	0.022	0.005	0.008	0.041	0	0.019	0.002	0.004	0.038	0	0.015	0	0	0	0	0
CPI-SS0E4DE8215	WNT2_FZD1	simple:P09544	simple:Q9UP38	WNT2	FZD1	TRUE	FALSE	TRUE	I2D	FALSE	0.001	0.004	0.037	0	0.015	0.004	0.006	0.04	0	0.018	0.003	0.005	0.039	0	0.017	0.003	0.005	0.039	0	0.016	0	0	0	0	0
CPI-SS0E7523314	WNT3_FZD1	simple:P56703	simple:Q9UP38	WNT3	FZD1	TRUE	FALSE	TRUE	I2D	FALSE	0.02	0.022	0.055	0	0.033	0.011	0.013	0.047	0	0.025	0.005	0.008	0.041	0	0.019	0.005	0.007	0.04	0	0.018	0	0	0	0	0
CPI-SS0D81C6C1D	WNT7B_FZD1	simple:P56706	simple:Q9UP38	WNT7B	FZD1	TRUE	FALSE	TRUE	curated	FALSE	0.002	0.005	0.038	0	0.016	0.003	0.005	0.039	0	0.016	0.1	0.102	0.135	0	0.113	0.002	0.004	0.038	0	0.015	0.04	0.042	0.076	0	0.053
CPI-SS0261EA048	WNT3A_FZD2	simple:P56704	simple:Q14332	WNT3A	FZD2	TRUE	FALSE	TRUE	InnateDB-All	FALSE	0.001	0.007	0.007	0	0.005	0.001	0.007	0.007	0	0.006	0	0	0	0	0	0.002	0.008	0.007	0	0.006	0	0	0	0	0
CPI-SS01C2BA5C8	WNT5A_FZD2	simple:P41221	simple:Q14332	WNT5A	FZD2	TRUE	FALSE	TRUE	curated	FALSE	0.004	0.01	0.01	0	0.008	0.063	0.069	0.068	0	0.067	0.023	0.029	0.028	0	0.027	0.004	0.01	0.01	0	0.009	0.008	0.014	0.014	0	0.012
CPI-SS02C418D99	WNT2_FZD2	simple:P09544	simple:Q14332	WNT2	FZD2	TRUE	FALSE	TRUE	curated	FALSE	0.001	0.007	0.007	0	0.005	0.004	0.01	0.009	0	0.008	0.003	0.009	0.008	0	0.007	0.003	0.009	0.008	0	0.007	0	0	0	0	0
CPI-SS0097929A7	BMP7_SLAMF1	simple:P18075	simple:Q13291	BMP7	SLAMF1	TRUE	FALSE	TRUE	InnateDB-All	FALSE	0.007	0.015	0.003	0.005	0.003	0.022	0.03	0.018	0.02	0.018	0.032	0.04	0.028	0.029	0.027	0.009	0.017	0.005	0.006	0.004	0.078	0.085	0.073	0.075	0.073
CPI-SS0E32BEF02	WNT5A_FZD5	simple:P41221	simple:Q13467	WNT5A	FZD5	TRUE	FALSE	TRUE	curated	FALSE	0.007	0.004	0.005	0.008	0.006	0.066	0.063	0.063	0.067	0.065	0.025	0.023	0.023	0.026	0.024	0.007	0.005	0.005	0.008	0.006	0.011	0.008	0.009	0.012	0.01
CPI-SS05550A895	WNT7A_FZD5	simple:O00755	simple:Q13467	WNT7A	FZD5	TRUE	FALSE	TRUE	curated	FALSE	0.004	0.002	0.002	0.005	0.003	0.006	0.003	0.004	0.007	0.005	0.073	0.071	0.071	0.074	0.072	0	0	0	0	0	0.084	0.081	0.082	0.085	0.083
CPI-SS0D4F593F1	WNT5A_EPHA7	simple:P41221	simple:Q15375	WNT5A	EPHA7	TRUE	FALSE	TRUE	InnateDB-All	FALSE	0.039	0.75	0.195	0.059	0.144	0.098	0.809	0.254	0.118	0.203	0.057	0.769	0.214	0.078	0.163	0.039	0.751	0.196	0.059	0.144	0.043	0.754	0.199	0.063	0.148
CPI-SS01DCC7684	EFNA2_EPHA7	simple:O43921	simple:Q15375	EFNA2	EPHA7	FALSE	FALSE	TRUE	curated	FALSE	0.052	0.764	0.209	0.073	0.158	0.054	0.766	0.211	0.075	0.16	0.066	0.777	0.222	0.086	0.171	0.04	0.752	0.196	0.06	0.145	0.053	0.764	0.209	0.073	0.158
CPI-SS03E450F99	EFNA1_EPHA7	simple:P20827	simple:Q15375	EFNA1	EPHA7	TRUE	FALSE	TRUE	curated	FALSE	0.046	0.758	0.203	0.067	0.152	0.04	0.751	0.196	0.06	0.145	0.038	0.749	0.194	0.058	0.143	0.037	0.749	0.194	0.058	0.143	0.038	0.75	0.194	0.058	0.143
CPI-SS0D5DBB634	EFNA3_EPHA7	simple:P52797	simple:Q15375	EFNA3	EPHA7	FALSE	FALSE	TRUE	curated	FALSE	0.04	0.752	0.196	0.06	0.145	0.111	0.822	0.267	0.131	0.216	0.045	0.756	0.201	0.065	0.15	0.041	0.753	0.197	0.061	0.146	0.038	0.75	0.194	0.058	0.143
CPI-SS0F81DBF22	EFNA4_EPHA7	simple:P52798	simple:Q15375	EFNA4	EPHA7	TRUE	FALSE	TRUE	curated	FALSE	0	0	0	0	0	0.036	0.748	0.192	0.056	0.141	0.038	0.75	0.195	0.058	0.144	0	0	0	0	0	0	0	0	0	0
CPI-SS028688B7B	EFNA5_EPHA7	simple:P52803	simple:Q15375	EFNA5	EPHA7	FALSE	FALSE	TRUE	curated	FALSE	0.11	0.821	0.266	0.13	0.215	2.783	3.495	2.94	2.803	2.889	0.403	1.115	0.559	0.423	0.508	0.223	0.935	0.379	0.243	0.328	0.159	0.871	0.316	0.179	0.265
CPI-SS0C56C483F	WNT5A_ANTXR1	simple:P41221	simple:Q9H6X2	WNT5A	ANTXR1	TRUE	FALSE	TRUE	InnateDB-All	FALSE	0.09	0.479	0.638	0.038	0.319	0.149	0.538	0.697	0.096	0.378	0.109	0.498	0.657	0.056	0.337	0.09	0.48	0.638	0.038	0.319	0.094	0.483	0.642	0.042	0.323
CPI-SS0E7CBFD03	WNT5A_ROR2	simple:P41221	simple:Q01974	WNT5A	ROR2	TRUE	FALSE	TRUE	I2D	FALSE	0.013	0.155	0.36	0.02	0.108	0.071	0.214	0.419	0.079	0.166	0.031	0.174	0.379	0.039	0.126	0.013	0.156	0.361	0.02	0.108	0.017	0.16	0.364	0.024	0.112
CPI-SS00A6240B6	WNT1_ROR2	simple:P04628	simple:Q01974	WNT1	ROR2	TRUE	FALSE	TRUE	InnateDB-All	FALSE	0.009	0.152	0.357	0.017	0.104	0.01	0.153	0.357	0.017	0.105	0	0	0	0	0	0.01	0.153	0.358	0.018	0.105	0	0	0	0	0
CPI-SS002673EFE	WNT5A_FZD3	simple:P41221	simple:Q9NPG1	WNT5A	FZD3	TRUE	FALSE	TRUE	curated	FALSE	0.042	0.315	0.138	0.038	0.19	0.101	0.373	0.197	0.097	0.249	0.061	0.333	0.157	0.057	0.209	0.042	0.315	0.138	0.039	0.191	0.046	0.319	0.142	0.043	0.194
CPI-SS014B0FCD2	WNT1_FZD3	simple:P04628	simple:Q9NPG1	WNT1	FZD3	TRUE	FALSE	TRUE	I2D	FALSE	0.039	0.311	0.135	0.035	0.187	0.039	0.312	0.135	0.036	0.187	0	0	0	0	0	0.04	0.312	0.136	0.036	0.188	0	0	0	0	0
CPI-SS0F26BB901	WNT2_FZD3	simple:P09544	simple:Q9NPG1	WNT2	FZD3	TRUE	FALSE	TRUE	curated	FALSE	0.039	0.312	0.135	0.035	0.187	0.042	0.314	0.138	0.038	0.19	0.041	0.313	0.137	0.037	0.189	0.041	0.313	0.137	0.037	0.189	0	0	0	0	0
CPI-SS073F3FAD5	WNT5A_ROR1	simple:P41221	simple:Q01973	WNT5A	ROR1	TRUE	FALSE	TRUE	IMEx	FALSE	0.05	0.158	0.519	0.01	0.217	0.109	0.217	0.578	0.069	0.276	0.069	0.176	0.538	0.028	0.235	0.05	0.158	0.52	0.01	0.217	0.054	0.162	0.524	0.014	0.221
CPI-SS0AD0ED887	TNFRSF11B_TNFSF10	simple:O00300	simple:P50591	TNFRSF11B	TNFSF10	TRUE	FALSE	FALSE	curated	FALSE	0.001	0.003	0.002	0.011	0	0.009	0.011	0.01	0.019	0	0.011	0.013	0.012	0.021	0	0.001	0.003	0.002	0.011	0	0.058	0.061	0.06	0.068	0
CPI-SS0898D7F7F	TNFRSF10B_TNFSF10	simple:O14763	simple:P50591	TNFRSF10B	TNFSF10	TRUE	TRUE	FALSE	curated	FALSE	0.004	0.006	0.005	0.014	0	0.04	0.043	0.042	0.05	0	0.011	0.013	0.012	0.021	0	0.005	0.007	0.006	0.015	0	0.029	0.031	0.031	0.039	0
CPI-SS023738D54	FGFR1_FGF3	simple:P11362	simple:P11487	FGFR1	FGF3	TRUE	TRUE	FALSE	I2D,InnateDB-All	FALSE	0.049	0.062	0.05	0.05	0	0.601	0.615	0.602	0.602	0	0.218	0.231	0.219	0.219	0	0.049	0.062	0.05	0.05	0	0.103	0.116	0.103	0.104	0
CPI-SS0E0BCE16F	FGFR1_FGF5	simple:P11362	simple:P12034	FGFR1	FGF5	TRUE	TRUE	FALSE	I2D,InnateDB-All	FALSE	0.05	0.077	0.051	0	0.058	0.602	0.629	0.603	0	0.61	0.219	0.246	0.22	0	0.227	0.05	0.077	0.051	0	0.058	0.103	0.131	0.105	0	0.112
CPI-SS039799099	FGFR1_NCAM1	simple:P11362	simple:P13591	FGFR1	NCAM1	TRUE	TRUE	TRUE	curated	FALSE	2.517	3.693	3.457	0.559	3.357	3.069	4.246	4.01	1.111	3.909	2.686	3.862	3.626	0.727	3.525	2.517	3.693	3.457	0.558	3.356	2.57	3.747	3.511	0.612	3.41
CPI-SS07833475A	FGFR1_FGF7	simple:P11362	simple:P21781	FGFR1	FGF7	TRUE	TRUE	FALSE	I2D	FALSE	0.052	0.062	0.068	0.05	0	0.604	0.614	0.62	0.602	0	0.22	0.231	0.236	0.219	0	0.051	0.062	0.067	0.05	0	0.105	0.116	0.121	0.104	0
CPI-SS038E93B77	FGFR1_FGF9	simple:P11362	simple:P31371	FGFR1	FGF9	TRUE	TRUE	FALSE	I2D,InnateDB-All	FALSE	0.067	0.398	0.084	0.081	0.07	0.619	0.95	0.636	0.633	0.622	0.236	0.567	0.252	0.25	0.239	0.067	0.398	0.083	0.081	0.07	0.121	0.451	0.137	0.134	0.124
CPI-SS0907A7598	FGFR2_FGF9	simple:P21802	simple:P31371	FGFR2	FGF9	TRUE	TRUE	FALSE	I2D,InnateDB-All	FALSE	2.113	2.444	2.13	2.127	2.116	3.54	3.871	3.557	3.554	3.543	2.34	2.671	2.357	2.354	2.343	0.638	0.969	0.655	0.652	0.642	1.257	1.587	1.273	1.27	1.26
CPI-SS0649EA05F	FGFR4_FGF9	simple:P22455	simple:P31371	FGFR4	FGF9	TRUE	TRUE	FALSE	I2D	FALSE	0.021	0.352	0.037	0.035	0.024	0.02	0.351	0.037	0.034	0.023	0	0	0	0	0	0	0	0	0	0	0	0	0	0	0
CPI-SS07A9A501C	FGFR3_FGF9	simple:P22607	simple:P31371	FGFR3	FGF9	TRUE	TRUE	FALSE	I2D,InnateDB-All	FALSE	0.025	0.356	0.042	0.039	0.028	0.033	0.364	0.05	0.047	0.037	1.043	1.374	1.06	1.057	1.047	0.022	0.353	0.039	0.036	0.026	0.094	0.425	0.111	0.108	0.097
CPI-SS07A0F4D73	FGFR1_FGF23	simple:P11362	simple:Q9GZV9	FGFR1	FGF23	TRUE	TRUE	FALSE	IMEx,InnateDB-All	FALSE	0.049	0.055	0.049	0	0	0.601	0.607	0.601	0	0	0.218	0.223	0.218	0	0	0.049	0.054	0.049	0	0	0.102	0.108	0.103	0	0
CPI-SS01D785DBA	FGFR2_FGF23	simple:P21802	simple:Q9GZV9	FGFR2	FGF23	TRUE	TRUE	FALSE	I2D,IMEx,InnateDB-All,IntAct	FALSE	2.095	2.1	2.095	0	0	3.522	3.528	3.522	0	0	2.322	2.328	2.322	0	0	0.62	0.626	0.62	0	0	1.238	1.244	1.239	0	0
CPI-SS0883B7EE4	FGFR3_FGF23	simple:P22607	simple:Q9GZV9	FGFR3	FGF23	TRUE	TRUE	FALSE	I2D	FALSE	0.007	0.012	0.007	0	0	0.015	0.021	0.015	0	0	1.025	1.031	1.025	0	0	0.004	0.01	0.004	0	0	0.076	0.081	0.076	0	0
CPI-SS0BF490275	FGFR1_KL	simple:P11362	simple:Q9UEF7	FGFR1	KL	TRUE	TRUE	FALSE	I2D	FALSE	0.049	0.058	0.051	0	0	0.601	0.611	0.603	0	0	0.218	0.227	0.219	0	0	0.049	0.058	0.05	0	0	0.103	0.112	0.104	0	0
CPI-SS06A0B20BD	FGFR2_EPHA4	simple:P21802	simple:P54764	FGFR2	EPHA4	TRUE	TRUE	TRUE	I2D,InnateDB-All	FALSE	2.241	2.811	2.84	2.182	2.272	3.669	4.238	4.268	3.609	3.699	2.469	3.038	3.068	2.409	2.499	0.767	1.336	1.366	0.707	0.797	1.385	1.955	1.984	1.325	1.415
CPI-SS0E63AB61E	EFNA2_EPHA4	simple:O43921	simple:P54764	EFNA2	EPHA4	FALSE	FALSE	TRUE	curated	FALSE	0.164	0.734	0.763	0.104	0.194	0.166	0.736	0.765	0.106	0.196	0.177	0.747	0.776	0.118	0.208	0.152	0.721	0.751	0.092	0.182	0.164	0.734	0.763	0.104	0.194
CPI-SS0EBFE1854	EFNA1_EPHA4	simple:P20827	simple:P54764	EFNA1	EPHA4	TRUE	FALSE	TRUE	curated	FALSE	0.158	0.728	0.757	0.098	0.188	0.151	0.721	0.75	0.092	0.182	0.149	0.719	0.748	0.089	0.179	0.149	0.719	0.748	0.089	0.179	0.149	0.719	0.749	0.09	0.18
CPI-SS05B4EB419	EFNA3_EPHA4	simple:P52797	simple:P54764	EFNA3	EPHA4	FALSE	FALSE	TRUE	curated	FALSE	0.151	0.721	0.75	0.092	0.182	0.222	0.792	0.821	0.162	0.252	0.156	0.726	0.755	0.096	0.186	0.153	0.722	0.752	0.093	0.183	0.149	0.719	0.749	0.09	0.18
CPI-SS0659DBE72	EFNA4_EPHA4	simple:P52798	simple:P54764	EFNA4	EPHA4	TRUE	FALSE	TRUE	curated	FALSE	0	0	0	0	0	0.148	0.717	0.747	0.088	0.178	0.15	0.72	0.749	0.09	0.18	0	0	0	0	0	0	0	0	0	0
CPI-SS0FC01B947	EFNA5_EPHA4	simple:P52803	simple:P54764	EFNA5	EPHA4	FALSE	FALSE	TRUE	curated	FALSE	0.221	0.791	0.82	0.162	0.252	2.895	3.465	3.494	2.835	2.925	0.514	1.084	1.114	0.455	0.545	0.334	0.904	0.934	0.275	0.365	0.271	0.841	0.87	0.211	0.301
CPI-SS087E0E3FB	EFNB2_EPHA4	simple:P52799	simple:P54764	EFNB2	EPHA4	FALSE	TRUE	TRUE	curated	FALSE	0.157	0.727	0.756	0.097	0.187	0.297	0.867	0.896	0.237	0.327	0.17	0.74	0.769	0.11	0.2	0.161	0.731	0.76	0.101	0.191	0.162	0.731	0.761	0.102	0.192
CPI-SS0816A4ED4	FGFR4_EPHA4	simple:P22455	simple:P54764	FGFR4	EPHA4	TRUE	TRUE	TRUE	I2D,InnateDB-All	FALSE	0.149	0.719	0.748	0.089	0.179	0.148	0.718	0.748	0.089	0.179	0	0	0	0	0	0	0	0	0	0	0	0	0	0	0
CPI-SS0D1AE5C79	FGFR3_EPHA4	simple:P22607	simple:P54764	FGFR3	EPHA4	TRUE	TRUE	TRUE	I2D,InnateDB-All	FALSE	0.153	0.723	0.752	0.094	0.184	0.162	0.732	0.761	0.102	0.192	1.172	1.741	1.771	1.112	1.202	0.151	0.721	0.75	0.091	0.181	0.222	0.792	0.821	0.162	0.252
CPI-SS00D9A0644	FGFR2_CD83	simple:P21802	simple:Q01151	FGFR2	CD83	TRUE	TRUE	TRUE	InnateDB-All	FALSE	2.108	2.213	2.114	2.188	2.136	3.535	3.64	3.541	3.615	3.563	2.335	2.44	2.341	2.415	2.363	0.633	0.738	0.639	0.713	0.661	1.251	1.356	1.258	1.332	1.279
CPI-SS02E314589	FGFR2_NECTIN1	simple:P21802	simple:Q15223	FGFR2	NECTIN1	TRUE	TRUE	TRUE	InnateDB-All	FALSE	2.289	2.287	2.147	2.122	2.211	3.717	3.714	3.574	3.549	3.638	2.517	2.514	2.374	2.349	2.438	0.815	0.812	0.672	0.647	0.736	1.433	1.43	1.29	1.266	1.354
CPI-SS02C29C238	FGFR3_NECTIN1	simple:P22607	simple:Q15223	FGFR3	NECTIN1	TRUE	TRUE	TRUE	InnateDB-All	FALSE	0.201	0.199	0.059	0.034	0.123	0.21	0.207	0.067	0.043	0.131	1.22	1.217	1.077	1.053	1.141	0.199	0.196	0.056	0.032	0.12	0.27	0.268	0.127	0.103	0.192
CPI-SS03F821467	CD96_NECTIN1	simple:P40200	simple:Q15223	CD96	NECTIN1	TRUE	TRUE	TRUE	curated	FALSE	0.195	0.193	0.052	0.028	0.117	0.197	0.194	0.054	0.03	0.118	0	0	0	0	0	0	0	0	0	0	0	0	0	0	0
CPI-SS0CC898553	FGFR2_PTPRR	simple:P21802	simple:Q15256	FGFR2	PTPRR	TRUE	TRUE	TRUE	InnateDB-All	FALSE	2.127	3.462	2.216	2.162	2.495	3.554	4.889	3.643	3.589	3.922	2.354	3.689	2.443	2.389	2.722	0.653	1.987	0.741	0.687	1.02	1.271	2.606	1.359	1.306	1.638
CPI-SS0658257AC	FGFR4_PTPRR	simple:P22455	simple:Q15256	FGFR4	PTPRR	TRUE	TRUE	TRUE	InnateDB-All	FALSE	0.035	1.37	0.123	0.07	0.403	0.034	1.369	0.123	0.069	0.402	0	0	0	0	0	0	0	0	0	0	0	0	0	0	0
CPI-SS098F416C1	FGFR2_XPR1	simple:P21802	simple:Q9UBH6	FGFR2	XPR1	TRUE	TRUE	TRUE	InnateDB-All	FALSE	2.218	3.181	2.762	2.35	2.568	3.645	4.609	4.189	3.778	3.995	2.445	3.409	2.989	2.578	2.795	0.743	1.707	1.288	0.876	1.093	1.362	2.325	1.906	1.494	1.711
CPI-SS0EB136379	WNT1_CD36	simple:P04628	simple:P16671	WNT1	CD36	TRUE	FALSE	TRUE	InnateDB	FALSE	0	0.002	0	0.005	0.003	0.001	0.003	0	0.005	0.003	0	0	0	0	0	0.001	0.003	0	0.006	0.003	0	0	0	0	0
CPI-SS0D8972B21	WNT1_RYK	simple:P04628	simple:P34925	WNT1	RYK	TRUE	FALSE	TRUE	I2D	FALSE	0.095	0.59	0.381	0.076	0.219	0.095	0.59	0.381	0.077	0.219	0	0	0	0	0	0.095	0.591	0.382	0.077	0.219	0	0	0	0	0
CPI-SS0A69F13A3	WNT4_SMO	simple:P56705	simple:Q99835	WNT4	SMO	TRUE	FALSE	TRUE	I2D	FALSE	0.003	0.02	0.207	0.071	0.003	0.009	0.026	0.213	0.078	0.01	0.006	0.023	0.21	0.075	0.007	0.003	0.02	0.207	0.071	0.003	0	0	0	0	0
CPI-SS016B7C7D6	BMP2_SMO	simple:P12643	simple:Q99835	BMP2	SMO	TRUE	FALSE	TRUE	I2D	FALSE	0.009	0.026	0.213	0.078	0.01	0.022	0.039	0.226	0.09	0.022	0.003	0.02	0.207	0.072	0.004	0.006	0.023	0.21	0.074	0.006	0.016	0.034	0.22	0.085	0.017
CPI-SS0C2561156	WNT2_FZD4	simple:P09544	simple:Q9ULV1	WNT2	FZD4	TRUE	FALSE	TRUE	curated	FALSE	0.004	0.022	0.017	0.008	0.003	0.007	0.025	0.02	0.01	0.005	0.006	0.024	0.019	0.01	0.005	0.005	0.024	0.019	0.009	0.004	0	0	0	0	0
CPI-SS0B8083B44	WNT7B_FZD4	simple:P56706	simple:Q9ULV1	WNT7B	FZD4	TRUE	FALSE	TRUE	curated	FALSE	0.005	0.023	0.018	0.009	0.004	0.005	0.024	0.019	0.009	0.004	0.102	0.121	0.116	0.106	0.101	0.005	0.023	0.018	0.008	0.003	0.042	0.061	0.056	0.046	0.041
CPI-SS01469637C	WNT2B_FZD4	simple:Q93097	simple:Q9ULV1	WNT2B	FZD4	TRUE	FALSE	TRUE	curated	FALSE	0.012	0.03	0.025	0.016	0.011	0.042	0.06	0.055	0.045	0.04	0.013	0.032	0.027	0.017	0.012	0.011	0.029	0.024	0.015	0.01	0.013	0.032	0.027	0.017	0.012
CPI-SS0A683CBC1	WNT7B_FZD10	simple:P56706	simple:Q9ULW2	WNT7B	FZD10	TRUE	FALSE	TRUE	curated	FALSE	0.002	0.002	0.015	0.002	0	0.002	0.003	0.016	0.003	0	0.099	0.1	0.113	0.1	0	0.001	0.002	0.015	0.002	0	0.039	0.04	0.053	0.04	0
CPI-SS0423580E5	DLL1_NOTCH2	simple:O00548	simple:Q04721	DLL1	NOTCH2	FALSE	FALSE	TRUE	curated	FALSE	0.028	0.085	0.408	0.249	0.049	0.048	0.105	0.429	0.269	0.07	0.031	0.088	0.412	0.252	0.053	0.026	0.084	0.407	0.248	0.048	0.073	0.13	0.454	0.294	0.095
CPI-SS060B82BBC	JAG1_NOTCH2	simple:P78504	simple:Q04721	JAG1	NOTCH2	FALSE	FALSE	TRUE	curated	FALSE	0.028	0.085	0.408	0.249	0.049	0.037	0.094	0.418	0.258	0.059	0.082	0.14	0.463	0.304	0.104	0.026	0.084	0.407	0.248	0.048	0.087	0.144	0.468	0.309	0.109
CPI-SS0E1A8414D	DLK1_NOTCH2	simple:P80370	simple:Q04721	DLK1	NOTCH2	FALSE	FALSE	TRUE	curated	FALSE	0.036	0.093	0.417	0.257	0.058	0.167	0.224	0.548	0.389	0.189	0.041	0.098	0.422	0.262	0.063	0.042	0.099	0.423	0.263	0.064	0.032	0.089	0.412	0.253	0.053
CPI-SS047232C64	DLL1_NOTCH3	simple:O00548	simple:Q9UM47	DLL1	NOTCH3	FALSE	FALSE	TRUE	curated	FALSE	0.008	0.199	0.167	0.012	0.008	0.028	0.22	0.187	0.032	0.028	0.012	0.203	0.17	0.016	0.012	0.007	0.198	0.165	0.011	0.007	0.054	0.245	0.212	0.057	0.053
CPI-SS0B99F22A2	JAG1_NOTCH3	simple:P78504	simple:Q9UM47	JAG1	NOTCH3	FALSE	FALSE	TRUE	curated	FALSE	0.008	0.199	0.166	0.012	0.008	0.018	0.209	0.176	0.022	0.017	0.063	0.254	0.221	0.067	0.063	0.007	0.198	0.165	0.011	0.007	0.068	0.259	0.226	0.072	0.068
CPI-SS007AA9FDE	DLK1_NOTCH3	simple:P80370	simple:Q9UM47	DLK1	NOTCH3	FALSE	FALSE	TRUE	curated	FALSE	0.017	0.208	0.175	0.021	0.017	0.148	0.339	0.306	0.152	0.148	0.022	0.213	0.18	0.026	0.021	0.023	0.214	0.181	0.027	0.023	0.012	0.203	0.17	0.016	0.012
CPI-SS0F21DBF93	SCGB3A1_NOTCH3	simple:Q96QR1	simple:Q9UM47	SCGB3A1	NOTCH3	TRUE	FALSE	TRUE	InnateDB-All	FALSE	0	0	0	0	0	0.003	0.194	0.161	0.007	0.003	0	0	0	0	0	0	0	0	0	0	0	0	0	0	0
CPI-SS0938C6980	DLL4_NOTCH3	simple:Q9NR61	simple:Q9UM47	DLL4	NOTCH3	FALSE	FALSE	TRUE	curated	FALSE	0.003	0.194	0.162	0.007	0.003	0.006	0.197	0.164	0.01	0.006	0	0	0	0	0	0	0	0	0	0	0	0	0	0	0
CPI-SS035E5A708	DLL3_NOTCH3	simple:Q9NYJ7	simple:Q9UM47	DLL3	NOTCH3	FALSE	FALSE	TRUE	curated	FALSE	0.003	0.194	0.161	0.007	0.003	0.008	0.199	0.166	0.012	0.008	0.004	0.195	0.162	0.008	0.004	0	0	0	0	0	0.027	0.218	0.185	0.031	0.027
CPI-SS0BFB29A42	PLXNB2_PTN	simple:O15031	simple:P21246	PLXNB2	PTN	TRUE	TRUE	FALSE	I2D,IMEx,InnateDB-All,IntAct	FALSE	0.6	0.572	0.249	0.131	1.167	0.665	0.638	0.314	0.197	1.233	0.623	0.596	0.272	0.154	1.191	0.714	0.686	0.363	0.245	1.281	0.639	0.611	0.288	0.17	1.206
CPI-SS08FAC0A55	PLXNB2_SEMA4D	simple:O15031	simple:Q92854	PLXNB2	SEMA4D	FALSE	TRUE	TRUE	curated	FALSE	0.252	0.437	0.132	0.29	0.279	0.318	0.503	0.197	0.355	0.345	0.275	0.461	0.155	0.313	0.302	0.366	0.551	0.246	0.404	0.393	0.291	0.476	0.171	0.328	0.318
CPI-SS0CCCF7C69	PLXNB1_SEMA4D	simple:O43157	simple:Q92854	PLXNB1	SEMA4D	TRUE	TRUE	TRUE	curated	FALSE	0.292	0.477	0.171	0.329	0.319	0.261	0.446	0.141	0.299	0.288	0.509	0.695	0.389	0.547	0.537	0.252	0.437	0.132	0.289	0.279	0.349	0.534	0.229	0.387	0.376
CPI-SS06AA638A8	CD72_SEMA4D	simple:P21854	simple:Q92854	CD72	SEMA4D	FALSE	FALSE	TRUE	curated	FALSE	0.249	0.434	0.129	0.287	0.276	0.265	0.45	0.145	0.302	0.292	0.255	0.44	0.135	0.293	0.282	0.257	0.443	0.137	0.295	0.284	0.254	0.44	0.134	0.292	0.282
CPI-SS0C0A61F92	PLXNB2_SEMA4G	simple:O15031	simple:Q9NTN9	PLXNB2	SEMA4G	FALSE	TRUE	FALSE	curated	FALSE	0.013	0.13	0.032	0.034	0.029	0.079	0.196	0.097	0.1	0.095	0.037	0.154	0.055	0.058	0.052	0.127	0.244	0.146	0.148	0.143	0.052	0.169	0.07	0.073	0.068
CPI-SS0EBA5A4D8	VEGFD_KDR	simple:O43915	simple:P35968	VEGFD	KDR	TRUE	FALSE	TRUE	curated	FALSE	0.007	0.008	0.005	0.008	0.017	0.045	0.046	0.044	0.047	0.056	0.023	0.024	0.022	0.025	0.033	0.006	0.007	0.004	0.007	0.016	0	0	0	0	0
CPI-SS0C03F7CDC	VEGFA_KDR	simple:P15692	simple:P35968	VEGFA	KDR	TRUE	FALSE	TRUE	curated	FALSE	0.037	0.038	0.035	0.038	0.047	0.183	0.184	0.182	0.185	0.193	0.896	0.897	0.895	0.898	0.906	0.021	0.022	0.02	0.023	0.032	0.754	0.755	0.753	0.756	0.765
CPI-SS03156A825	LTA_LTBR	simple:P01374	simple:P36941	LTA	LTBR	TRUE	FALSE	TRUE	I2D	FALSE	0.002	0.003	0.01	0.021	0.022	0.003	0.004	0.012	0.022	0.024	0.002	0.003	0.011	0.021	0.023	0	0	0	0	0	0	0	0	0	0
CPI-SS0110361CB	LTA_TNFRSF14	simple:P01374	simple:Q92956	LTA	TNFRSF14	TRUE	FALSE	TRUE	curated	FALSE	0	0	0	0.005	0	0.002	0.002	0	0.006	0	0.001	0.001	0	0.005	0	0	0	0	0	0	0	0	0	0	0
CPI-SS0C28FEC7D	TNFSF13_TNFRSF14	simple:O75888	simple:Q92956	TNFSF13	TNFRSF14	TRUE	FALSE	TRUE	I2D,InnateDB-All	FALSE	0.001	0.001	0	0.006	0	0.012	0.012	0	0.016	0	0.004	0.004	0	0.008	0	0.002	0.002	0	0.006	0	0	0	0	0	0
CPI-SS0879B8E95	CD160_TNFRSF14	simple:O95971	simple:Q92956	CD160	TNFRSF14	FALSE	TRUE	TRUE	curated	FALSE	0.001	0.001	0	0.006	0	0.005	0.005	0	0.01	0	0.002	0.002	0	0.007	0	0	0	0	0	0	0.003	0.003	0	0.007	0
CPI-SS02ACCF1F7	MIF_TNFRSF14	simple:P14174	simple:Q92956	MIF	TNFRSF14	TRUE	FALSE	TRUE	I2D,IntAct	FALSE	0.043	0.043	0	0.047	0	0.112	0.112	0	0.117	0	0.06	0.06	0	0.065	0	0.044	0.044	0	0.048	0	0.063	0.063	0	0.068	0
CPI-SS08330207B	BTLA_TNFRSF14	simple:Q7Z6A9	simple:Q92956	BTLA	TNFRSF14	FALSE	TRUE	TRUE	guidetopharmacology.org	FALSE	0.001	0.001	0	0.005	0	0.024	0.024	0	0.028	0	0.002	0.002	0	0.006	0	0.008	0.008	0	0.013	0	0	0	0	0	0
CPI-SS0B89DD8C1	TNFSF13_TNFRSF17	simple:O75888	simple:Q02223	TNFSF13	TNFRSF17	TRUE	FALSE	TRUE	curated	FALSE	0.001	0.001	0.002	0.008	0	0.012	0.012	0.012	0.018	0	0.004	0.004	0.004	0.01	0	0.002	0.002	0.003	0.008	0	0	0	0	0	0
CPI-SS0C412B7DE	CD70_TNFRSF17	simple:P32970	simple:Q02223	CD70	TNFRSF17	TRUE	FALSE	TRUE	InnateDB-All	FALSE	0	0	0.001	0.007	0	0.002	0.002	0.002	0.008	0	0	0	0	0	0	0.002	0.002	0.003	0.008	0	0.01	0.01	0.01	0.016	0
CPI-SS095E52E66	TNFSF10_TNFRSF10D	simple:P50591	simple:Q9UBN6	TNFSF10	TNFRSF10D	TRUE	FALSE	TRUE	curated	FALSE	0.001	0.006	0.008	0.006	0	0.004	0.009	0.01	0.008	0	0.003	0.008	0.009	0.007	0	0.011	0.016	0.018	0.016	0	0	0	0	0	0
CPI-SS059EEFDC6	MIF_TNFRSF10D	simple:P14174	simple:Q9UBN6	MIF	TNFRSF10D	TRUE	FALSE	TRUE	I2D,IntAct	FALSE	0.044	0.049	0.05	0.048	0	0.113	0.118	0.12	0.118	0	0.061	0.066	0.068	0.066	0	0.045	0.05	0.051	0.049	0	0.064	0.069	0.071	0.069	0
CPI-SS0A81A3626	WNT7A_LDLR	simple:O00755	simple:P01130	WNT7A	LDLR	TRUE	FALSE	TRUE	InnateDB-All	FALSE	0.083	0.247	0.233	0.046	0.088	0.085	0.249	0.234	0.048	0.089	0.152	0.316	0.302	0.115	0.157	0	0	0	0	0	0.163	0.327	0.312	0.126	0.167
CPI-SS0B34CBA4B	EFNA2_EPHA1	simple:O43921	simple:P21709	EFNA2	EPHA1	FALSE	FALSE	TRUE	curated	FALSE	0.02	0.023	0.018	0.021	0.024	0.022	0.025	0.02	0.023	0.026	0.033	0.036	0.031	0.034	0.038	0.008	0.011	0.005	0.008	0.012	0.02	0.023	0.018	0.021	0.024
CPI-SS0FF49C823	EFNA1_EPHA1	simple:P20827	simple:P21709	EFNA1	EPHA1	TRUE	FALSE	TRUE	curated	FALSE	0.014	0.017	0.012	0.015	0.018	0.007	0.01	0.005	0.008	0.012	0.005	0.008	0.003	0.006	0.009	0.005	0.008	0.003	0.006	0.009	0.006	0.008	0.003	0.006	0.01
CPI-SS08A54963F	EFNA2_EPHA2	simple:O43921	simple:P29317	EFNA2	EPHA2	FALSE	FALSE	TRUE	curated	FALSE	0	0.018	0	0.022	0	0	0.02	0	0.024	0	0	0.032	0	0.036	0	0	0.006	0	0.01	0	0	0.018	0	0.023	0
CPI-SS046F6F0C1	EFNA1_EPHA2	simple:P20827	simple:P29317	EFNA1	EPHA2	TRUE	FALSE	TRUE	curated	FALSE	0	0.012	0	0.016	0	0	0.006	0	0.01	0	0	0.004	0	0.008	0	0	0.003	0	0.007	0	0	0.004	0	0.008	0
CPI-SS0C875BA24	EFNA2_EPHA3	simple:O43921	simple:P29320	EFNA2	EPHA3	TRUE	FALSE	TRUE	curated	FALSE	0.031	0.43	0.053	0.048	0.063	0.034	0.432	0.055	0.05	0.065	0.045	0.443	0.066	0.062	0.076	0.019	0.417	0.041	0.036	0.051	0.032	0.43	0.053	0.049	0.063
CPI-SS09CA492BA	EFNA1_EPHA3	simple:P20827	simple:P29320	EFNA1	EPHA3	TRUE	FALSE	TRUE	curated	FALSE	0.026	0.424	0.047	0.042	0.057	0.019	0.417	0.04	0.036	0.05	0.017	0.415	0.038	0.034	0.048	0.016	0.415	0.038	0.033	0.048	0.017	0.415	0.038	0.034	0.049
CPI-SS0830C7910	EFNA2_EPHA8	simple:O43921	simple:P29322	EFNA2	EPHA8	FALSE	FALSE	TRUE	curated	FALSE	0.018	0.051	0.024	0.021	0	0.02	0.053	0.026	0.023	0	0.031	0.064	0.037	0.034	0	0.005	0.038	0.012	0.008	0	0.018	0.051	0.024	0.021	0
CPI-SS037E6BEDF	EFNA1_EPHA8	simple:P20827	simple:P29322	EFNA1	EPHA8	TRUE	FALSE	TRUE	curated	FALSE	0.012	0.045	0.018	0.015	0	0.005	0.038	0.011	0.008	0	0.003	0.036	0.009	0.006	0	0.003	0.036	0.009	0.006	0	0.003	0.036	0.009	0.006	0
CPI-SS0D81D9F5E	EFNA2_EPHA5	simple:O43921	simple:P54756	EFNA2	EPHA5	FALSE	FALSE	TRUE	curated	FALSE	0.154	3.916	1.353	0.263	1.403	0.156	3.918	1.355	0.265	1.405	0.168	3.93	1.367	0.276	1.416	0.142	3.904	1.341	0.25	1.391	0.154	3.916	1.353	0.263	1.403
CPI-SS0762B455F	EFNA1_EPHA5	simple:P20827	simple:P54756	EFNA1	EPHA5	TRUE	FALSE	TRUE	curated	FALSE	0.148	3.91	1.347	0.257	1.397	0.142	3.904	1.341	0.25	1.39	0.139	3.902	1.339	0.248	1.388	0.139	3.901	1.338	0.248	1.388	0.14	3.902	1.339	0.248	1.388
CPI-SS079EF5D9C	EFNA3_EPHA5	simple:P52797	simple:P54756	EFNA3	EPHA5	FALSE	FALSE	TRUE	curated	FALSE	0.142	3.904	1.341	0.25	1.39	0.212	3.974	1.411	0.321	1.461	0.146	3.909	1.346	0.255	1.395	0.143	3.905	1.342	0.251	1.391	0.14	3.902	1.339	0.248	1.388
CPI-SS0008137B6	EFNA4_EPHA5	simple:P52798	simple:P54756	EFNA4	EPHA5	TRUE	FALSE	TRUE	curated	FALSE	0	0	0	0	0	0.138	3.9	1.337	0.246	1.387	0.14	3.902	1.339	0.249	1.389	0	0	0	0	0	0	0	0	0	0
CPI-SS09E3F5044	EFNA5_EPHA5	simple:P52803	simple:P54756	EFNA5	EPHA5	FALSE	FALSE	TRUE	curated	FALSE	0.212	3.974	1.411	0.32	1.46	2.885	6.647	4.084	2.994	4.134	0.505	4.267	1.704	0.613	1.753	0.325	4.087	1.524	0.433	1.573	0.261	4.023	1.46	0.37	1.51
CPI-SC023986FB9	MSTN_TGFR_AVR2A	simple:O14793	complex:TGFR_AVR2A	MSTN		TRUE	FALSE	TRUE	curated	FALSE	0	0	0	0	0	0.072	0.185	0.135	0.147	0.185	0	0	0	0	0	0	0	0	0	0	0	0	0	0	0
CPI-SC08968AFE6	MSTN_TGFR_AVR2B	simple:O14793	complex:TGFR_AVR2B	MSTN		TRUE	FALSE	TRUE	curated	FALSE	0	0	0	0	0	0.039	0.089	0.028	0.048	0.062	0	0	0	0	0	0	0	0	0	0	0	0	0	0	0
CPI-SS073811AB3	TNFRSF11B_TNFSF11	simple:O00300	simple:O14788	TNFRSF11B	TNFSF11	TRUE	FALSE	TRUE	curated	FALSE	0.001	0.002	0.002	0	0	0.009	0.01	0.01	0	0	0.011	0.012	0.011	0	0	0.001	0.002	0.002	0	0	0.059	0.059	0.059	0	0
CPI-SC098C06330	TGFB1_TGFbeta receptor1	simple:P01137	complex:TGFbeta receptor1	TGFB1		TRUE	FALSE	TRUE	curated	FALSE	0.005	0.052	0.019	0.626	0.003	0.013	0.06	0.027	0.634	0.011	0.01	0.057	0.024	0.631	0.008	0.211	0.258	0.225	0.832	0.209	0	0	0	0	0
CPI-SC0D5CFA431	TGFB3_TGFbeta receptor1	simple:P10600	complex:TGFbeta receptor1	TGFB3		TRUE	FALSE	TRUE	curated	FALSE	0.069	0.116	0.083	0.69	0.068	0.045	0.091	0.059	0.666	0.043	0.027	0.074	0.042	0.649	0.026	0.013	0.06	0.028	0.635	0.012	0.048	0.095	0.062	0.669	0.046
CPI-SC03DD946B2	TGFB2_TGFbeta receptor1	simple:P61812	complex:TGFbeta receptor1	TGFB2		TRUE	FALSE	TRUE	curated	FALSE	0.01	0.056	0.024	0.631	0.008	0.074	0.121	0.088	0.695	0.072	0.096	0.143	0.11	0.717	0.094	0.011	0.057	0.025	0.632	0.009	0.028	0.075	0.043	0.65	0.027
CPI-SC0984894BC	TGFB1_TGFbeta receptor2	simple:P01137	complex:TGFbeta receptor2	TGFB1		TRUE	FALSE	TRUE	curated	FALSE	0.005	0.052	0.019	0.272	0.003	0.013	0.06	0.027	0.28	0.011	0.01	0.057	0.024	0.277	0.008	0.211	0.258	0.225	0.478	0.209	0	0	0	0	0
CPI-SC0077CEB82	TGFB3_TGFbeta receptor2	simple:P10600	complex:TGFbeta receptor2	TGFB3		TRUE	FALSE	TRUE	curated	FALSE	0.069	0.116	0.083	0.336	0.068	0.045	0.091	0.059	0.311	0.043	0.027	0.074	0.042	0.294	0.026	0.013	0.06	0.028	0.28	0.012	0.048	0.095	0.062	0.315	0.046
CPI-SC032246C72	TGFB2_TGFbeta receptor2	simple:P61812	complex:TGFbeta receptor2	TGFB2		TRUE	FALSE	TRUE	curated	FALSE	0.01	0.056	0.024	0.276	0.008	0.074	0.121	0.088	0.341	0.072	0.096	0.143	0.11	0.363	0.094	0.011	0.057	0.025	0.277	0.009	0.028	0.075	0.043	0.295	0.027
CPI-SS06CE0CF64	CORT_SSTR1	simple:O00230	simple:P30872	CORT	SSTR1	TRUE	FALSE	TRUE	guidetopharmacology.org	FALSE	0.001	0.012	0.002	0.003	0.02	0.002	0.014	0.004	0.004	0.021	0.002	0.013	0.003	0.003	0.02	0	0	0	0	0	0	0	0	0	0
CPI-SS00E5D7E39	CORT_GHSR	simple:O00230	simple:Q92847	CORT	GHSR	TRUE	FALSE	TRUE	I2D	FALSE	0.001	0.005	0	0	0	0.002	0.006	0	0	0	0.001	0.005	0	0	0	0	0	0	0	0	0	0	0	0	0
CPI-SS09CF5B145	AGRP_MC4R	simple:O00253	simple:P32245	AGRP	MC4R	TRUE	FALSE	TRUE	guidetopharmacology.org	FALSE	0.024	0.032	0	0.025	0	0.387	0.395	0	0.388	0	0.099	0.106	0	0.1	0	0.039	0.046	0	0.04	0	0.078	0.086	0	0.08	0
CPI-SS098F8DB82	POMC_MC4R	simple:P01189	simple:P32245	POMC	MC4R	TRUE	FALSE	TRUE	guidetopharmacology.org	FALSE	0.004	0.011	0	0.005	0	0.013	0.021	0	0.014	0	0.006	0.014	0	0.007	0	0.003	0.01	0	0.004	0	0.015	0.023	0	0.016	0
CPI-SS0CC136A8D	AGRP_MC5R	simple:O00253	simple:P33032	AGRP	MC5R	TRUE	FALSE	TRUE	guidetopharmacology.org	FALSE	0.024	0.025	0.03	0	0.043	0.387	0.389	0.393	0	0.406	0.099	0.1	0.104	0	0.117	0.039	0.04	0.044	0	0.057	0.078	0.08	0.084	0	0.097
CPI-SS0BE6DBE1A	POMC_MC5R	simple:P01189	simple:P33032	POMC	MC5R	TRUE	FALSE	TRUE	guidetopharmacology.org	FALSE	0.003	0.005	0.009	0	0.022	0.013	0.014	0.019	0	0.032	0.006	0.008	0.012	0	0.025	0.003	0.004	0.008	0	0.021	0.015	0.017	0.021	0	0.034
CPI-SS034C2FBA9	AGRP_MC3R	simple:O00253	simple:P41968	AGRP	MC3R	TRUE	FALSE	TRUE	guidetopharmacology.org	FALSE	0	0.024	0.024	0	0	0	0.387	0.387	0	0	0	0.099	0.099	0	0	0	0.039	0.039	0	0	0	0.078	0.078	0	0
CPI-SS0B1F94CD2	POMC_MC3R	simple:P01189	simple:P41968	POMC	MC3R	TRUE	FALSE	TRUE	guidetopharmacology.org	FALSE	0	0.003	0.003	0	0	0	0.013	0.013	0	0	0	0.006	0.006	0	0	0	0.002	0.003	0	0	0	0.015	0.015	0	0
CPI-SS0C0E2C69C	POMC_MC2R	simple:P01189	simple:Q01718	POMC	MC2R	TRUE	FALSE	TRUE	I2D	FALSE	0.003	0.004	0	0	0	0.012	0.013	0	0	0	0.006	0.007	0	0	0	0.002	0.003	0	0	0	0.015	0.015	0	0	0
CPI-SS00BD8FF72	POMC_MC1R	simple:P01189	simple:Q01726	POMC	MC1R	TRUE	FALSE	TRUE	guidetopharmacology.org	FALSE	0.003	0.007	0.003	0	0	0.013	0.017	0.013	0	0	0.006	0.01	0.006	0	0	0.002	0.006	0.003	0	0	0.015	0.019	0.015	0	0
CPI-SS00F282936	CXCR6_CXCL16	simple:O00574	simple:Q9H2A7	CXCR6	CXCL16	TRUE	TRUE	TRUE	guidetopharmacology.org	FALSE	0.007	0.009	0.009	0.02	0.014	0.012	0.014	0.014	0.026	0.019	0.011	0.014	0.013	0.025	0.019	0.01	0.013	0.012	0.024	0.017	0.017	0.019	0.019	0.031	0.024
CPI-SS04318D03E	ACKR2_CCL3	simple:O00590	simple:P10147	ACKR2	CCL3	TRUE	TRUE	FALSE	curated	FALSE	0.001	0	0	0.007	0	0	0	0	0.007	0	0	0	0	0	0	0.001	0	0	0.007	0	0	0	0	0	0
CPI-SS0AFE077D8	ACKR2_CCL4	simple:O00590	simple:P13236	ACKR2	CCL4	TRUE	TRUE	FALSE	curated	FALSE	0.001	0.001	0	0.015	0	0.001	0.001	0	0.014	0	0	0	0	0	0	0.001	0.001	0	0.015	0	0	0	0	0	0
CPI-SS03165AD8C	ACKR2_CCL2	simple:O00590	simple:P13500	ACKR2	CCL2	TRUE	TRUE	FALSE	curated	FALSE	0	0.001	0	0.003	0	0	0.001	0	0.002	0	0	0	0	0	0	0	0.001	0	0.003	0	0	0	0	0	0
CPI-SS0BE8BE8E9	ACKR2_CCL8	simple:O00590	simple:P80075	ACKR2	CCL8	TRUE	TRUE	FALSE	curated	FALSE	0.001	0.001	0	0.009	0	0.001	0.001	0	0.009	0	0	0	0	0	0	0.001	0.001	0	0.009	0	0	0	0	0	0
CPI-SS09AFCF898	CCR2_CCL8	simple:P41597	simple:P80075	CCR2	CCL8	TRUE	TRUE	FALSE	curated	FALSE	0	0	0	0.008	0	0.002	0.002	0	0.01	0	0.002	0.002	0	0.01	0	0.002	0.002	0	0.01	0	0	0	0	0	0
CPI-SS0DFAF1FE2	CCR5_CCL8	simple:P51681	simple:P80075	CCR5	CCL8	TRUE	TRUE	FALSE	curated	FALSE	0.002	0.002	0	0.01	0	0.007	0.007	0	0.015	0	0.006	0.006	0	0.014	0	0.213	0.213	0	0.221	0	0.007	0.008	0	0.016	0
CPI-SS091B461CB	ACKR2_CCL28	simple:O00590	simple:Q9NRJ3	ACKR2	CCL28	TRUE	TRUE	FALSE	I2D	FALSE	0.003	0.013	0.004	0.004	0	0.003	0.012	0.003	0.003	0	0	0	0	0	0	0.003	0.013	0.004	0.004	0	0	0	0	0	0
CPI-SS064C772FE	CCR10_CCL28	simple:P46092	simple:Q9NRJ3	CCR10	CCL28	TRUE	TRUE	FALSE	guidetopharmacology.org	FALSE	0.002	0.012	0.003	0.003	0	0.007	0.017	0.008	0.008	0	0.004	0.014	0.005	0.005	0	0.003	0.013	0.004	0.004	0	0.005	0.015	0.005	0.005	0
CPI-SS0D57FCA8C	IDE_CCL23	simple:P14735	simple:P55773	IDE	CCL23	TRUE	TRUE	FALSE	InnateDB-All	FALSE	0.064	0.065	0.064	0.069	0	0.533	0.534	0.534	0.538	0	0.163	0.164	0.164	0.168	0	0.069	0.07	0.069	0.074	0	0.124	0.125	0.124	0.129	0
CPI-SS08920B6FF	PODXL_SELL	simple:O00592	simple:P14151	PODXL	SELL	FALSE	FALSE	FALSE	curated	FALSE	0.005	0.005	0	0.01	0	0.016	0.016	0	0.022	0	0.002	0.002	0	0.007	0	0	0	0	0	0	0.005	0.005	0	0.01	0
CPI-SS04B547174	OXT_OXTR	simple:P01178	simple:P30559	OXT	OXTR	TRUE	FALSE	TRUE	I2D	FALSE	0.001	0.006	0	0	0	0.001	0.007	0	0	0	0.001	0.006	0	0	0	0	0	0	0	0	0	0	0	0	0
CPI-SS032AD1183	NPPA_NPR1	simple:P01160	simple:P16066	NPPA	NPR1	TRUE	FALSE	TRUE	guidetopharmacology.org	FALSE	0.004	0.006	0	0.003	0.005	0.025	0.027	0	0.024	0.026	0.006	0.008	0	0.005	0.007	0	0	0	0	0	0.009	0.011	0	0.008	0.01
CPI-SS0E063192D	NRG2_ERBB4	simple:O14511	simple:Q15303	NRG2	ERBB4	TRUE	FALSE	TRUE	curated	FALSE	2.757	6.229	6.704	0.813	8.701	4.883	8.354	8.83	2.939	10.826	3.272	6.743	7.219	1.328	9.215	2.822	6.294	6.769	0.878	8.766	3.156	6.628	7.103	1.212	9.1
CPI-SS0F0D7F25C	BTC_ERBB4	simple:P35070	simple:Q15303	BTC	ERBB4	TRUE	FALSE	TRUE	curated	FALSE	2.751	6.222	6.697	0.807	8.694	2.708	6.179	6.655	0.764	8.651	2.71	6.181	6.657	0.766	8.653	2.711	6.183	6.658	0.767	8.654	2.705	6.176	6.652	0.761	8.648
CPI-SS0D5E30C6C	NRG3_ERBB4	simple:P56975	simple:Q15303	NRG3	ERBB4	TRUE	FALSE	TRUE	curated	FALSE	3.631	7.102	7.577	1.687	9.574	36.882	40.354	40.829	34.938	42.825	6.062	9.533	10.008	4.118	12.005	4.836	8.308	8.783	2.892	10.78	9.533	13.004	13.479	7.589	15.476
CPI-SS0BD5C2A23	NRG1_ERBB4	simple:Q02297	simple:Q15303	NRG1	ERBB4	TRUE	TRUE	TRUE	curated	FALSE	3.238	6.709	7.185	1.294	9.181	20.379	23.851	24.326	18.435	26.322	4.083	7.554	8.03	2.139	10.026	3.784	7.256	7.731	1.84	9.728	4.246	7.718	8.193	2.302	10.189
CPI-SC0E5218AA4	NRG1_a6b4 complex	simple:Q02297	complex:a6b4 complex	NRG1		TRUE	TRUE	FALSE	curated	TRUE	0.55	0.555	0.551	0.557	0.555	17.691	17.696	17.693	17.698	17.696	1.395	1.4	1.396	1.401	1.4	1.096	1.101	1.098	1.103	1.101	1.558	1.563	1.56	1.565	1.563
CPI-SC0A68C5F13	IGF1_a6b4 complex	simple:P05019	complex:a6b4 complex	IGF1		TRUE	FALSE	FALSE	curated	TRUE	0.015	0.021	0.017	0.022	0.021	0.132	0.137	0.133	0.139	0.137	0.026	0.031	0.028	0.033	0.031	0.029	0.035	0.031	0.036	0.035	0.041	0.046	0.043	0.048	0.046
CPI-SS0708FE6FF	NRG1_LSR	simple:Q02297	simple:Q86X29	NRG1	LSR	TRUE	TRUE	TRUE	InnateDB-All	FALSE	0.54	0.552	0.542	0.546	0.54	17.682	17.693	17.683	17.687	17.682	1.385	1.396	1.387	1.391	1.385	1.087	1.098	1.089	1.093	1.087	1.549	1.56	1.55	1.554	1.549
CPI-SS0E075E5AF	NRG1_NETO2	simple:Q02297	simple:Q8NC67	NRG1	NETO2	TRUE	TRUE	TRUE	InnateDB-All	FALSE	0.565	0.961	0.643	0.565	0.679	17.706	18.103	17.784	17.706	17.82	1.41	1.806	1.488	1.41	1.524	1.112	1.508	1.189	1.111	1.225	1.573	1.97	1.651	1.573	1.687
CPI-SS02572E1EF	NRG1_LGR4	simple:Q02297	simple:Q9BXB1	NRG1	LGR4	TRUE	TRUE	TRUE	InnateDB-All	FALSE	0.71	1.229	0.97	0.599	0.618	17.851	18.37	18.111	17.74	17.759	1.555	2.074	1.815	1.444	1.463	1.257	1.776	1.516	1.146	1.165	1.718	2.237	1.978	1.607	1.626
CPI-SS034D3988F	RSPO4_LGR4	simple:Q2I0M5	simple:Q9BXB1	RSPO4	LGR4	TRUE	FALSE	TRUE	guidetopharmacology.org	FALSE	0	0	0	0	0	0.173	0.692	0.433	0.062	0.081	0	0	0	0	0	0	0	0	0	0	0	0	0	0	0
CPI-SS0057AB387	RSPO1_LGR4	simple:Q2MKA7	simple:Q9BXB1	RSPO1	LGR4	TRUE	FALSE	TRUE	guidetopharmacology.org	FALSE	0.173	0.692	0.432	0.062	0.081	0.185	0.704	0.445	0.074	0.093	0.174	0.693	0.433	0.063	0.082	0.178	0.697	0.437	0.067	0.086	0	0	0	0	0
CPI-SS01E3453DB	RSPO2_LGR4	simple:Q6UXX9	simple:Q9BXB1	RSPO2	LGR4	TRUE	FALSE	TRUE	guidetopharmacology.org	FALSE	0.176	0.695	0.435	0.065	0.084	0.242	0.761	0.502	0.131	0.15	0.178	0.697	0.437	0.067	0.086	0.178	0.697	0.437	0.067	0.086	0	0	0	0	0
CPI-SS0609FCF76	RSPO4_LGR6	simple:Q2I0M5	simple:Q9HBX8	RSPO4	LGR6	TRUE	FALSE	TRUE	guidetopharmacology.org	FALSE	0	0	0	0	0	0.003	0.006	0.321	0.004	0.003	0	0	0	0	0	0	0	0	0	0	0	0	0	0	0
CPI-SS0E5397537	RSPO1_LGR6	simple:Q2MKA7	simple:Q9HBX8	RSPO1	LGR6	TRUE	FALSE	TRUE	guidetopharmacology.org	FALSE	0.002	0.006	0.321	0.003	0.003	0.015	0.018	0.333	0.016	0.015	0.003	0.007	0.322	0.004	0.004	0.007	0.011	0.326	0.008	0.008	0	0	0	0	0
CPI-SS019104E2E	RSPO2_LGR6	simple:Q6UXX9	simple:Q9HBX8	RSPO2	LGR6	TRUE	FALSE	TRUE	guidetopharmacology.org	FALSE	0.006	0.009	0.324	0.007	0.006	0.072	0.075	0.39	0.073	0.073	0.007	0.011	0.326	0.008	0.008	0.007	0.011	0.326	0.008	0.008	0	0	0	0	0
CPI-SS0EB5364D4	RSPO3_LGR6	simple:Q9BXY4	simple:Q9HBX8	RSPO3	LGR6	TRUE	FALSE	TRUE	guidetopharmacology.org	FALSE	0.005	0.009	0.324	0.006	0.006	0.122	0.125	0.44	0.123	0.122	0.027	0.031	0.346	0.028	0.028	0.012	0.015	0.33	0.013	0.013	0.007	0.01	0.325	0.008	0.007
CPI-SS0ED2573CA	TNFSF11_TNFRSF11A	simple:O14788	simple:Q9Y6Q6	TNFSF11	TNFRSF11A	TRUE	TRUE	TRUE	curated	FALSE	0.005	0.167	0.023	0.305	0.015	0.006	0.168	0.024	0.305	0.016	0.005	0.168	0.023	0.305	0.015	0	0	0	0	0	0	0	0	0	0
CPI-SS06A999D25	PLD2_ARF1	simple:O14939	simple:P84077	PLD2	ARF1	FALSE	FALSE	FALSE	guidetopharmacology.org	FALSE	0.086	0.223	0.11	0.097	0.114	0.103	0.241	0.128	0.115	0.132	0.23	0.367	0.255	0.241	0.259	0.108	0.246	0.133	0.12	0.137	0.088	0.225	0.113	0.099	0.117
CPI-SS0F3A089DE	SEMA3E_PLXND1	simple:O15041	simple:Q9Y4D7	SEMA3E	PLXND1	TRUE	FALSE	TRUE	curated	FALSE	0.036	0.039	0.038	0.037	0.06	0.162	0.165	0.164	0.163	0.186	0.016	0.019	0.018	0.018	0.04	0.015	0.018	0.017	0.017	0.039	0.403	0.406	0.405	0.405	0.427
CPI-SS044C72D0D	SEMA4A_PLXND1	simple:Q9H3S1	simple:Q9Y4D7	SEMA4A	PLXND1	FALSE	FALSE	TRUE	curated	FALSE	0.006	0.009	0.008	0.007	0.03	0.113	0.116	0.115	0.115	0.137	0.164	0.167	0.166	0.165	0.188	0.019	0.022	0.021	0.02	0.043	0.051	0.054	0.053	0.053	0.075
CPI-SS0BAB460FF	ANGPT2_TEK	simple:O15123	simple:Q02763	ANGPT2	TEK	TRUE	FALSE	TRUE	curated	FALSE	0.019	0.242	0.034	0.027	0.026	0.286	0.509	0.301	0.295	0.293	0.049	0.272	0.064	0.058	0.056	0.046	0.268	0.06	0.054	0.052	0.076	0.299	0.091	0.084	0.083
CPI-SS090FC28E1	EPHB6_EFNB2	simple:O15197	simple:P52799	EPHB6	EFNB2	TRUE	TRUE	TRUE	curated	FALSE	0.013	0.154	0.027	0.017	0.018	0.103	0.243	0.116	0.107	0.108	0.019	0.159	0.032	0.023	0.024	0.015	0.156	0.029	0.019	0.02	0.041	0.182	0.055	0.045	0.046
CPI-SS04124F4E1	EPO_EFNB2	simple:P01588	simple:P52799	EPO	EFNB2	TRUE	FALSE	TRUE	IMEx,IntAct	FALSE	0.021	0.161	0.035	0.025	0.026	0.064	0.204	0.077	0.068	0.068	0.031	0.171	0.044	0.035	0.036	0.025	0.165	0.038	0.029	0.029	0.027	0.167	0.04	0.031	0.032
CPI-SS0B9E8C0DE	EPHB2_EFNB2	simple:P29323	simple:P52799	EPHB2	EFNB2	FALSE	TRUE	TRUE	curated	FALSE	0.054	0.195	0.068	0.058	0.059	0.706	0.846	0.719	0.71	0.71	0.081	0.221	0.094	0.085	0.086	0.054	0.195	0.068	0.058	0.059	0.151	0.291	0.164	0.155	0.155
CPI-SS0DC4D593E	EPHB6_EFNB1	simple:O15197	simple:P98172	EPHB6	EFNB1	TRUE	TRUE	FALSE	curated	FALSE	0.005	0.013	0.01	0.007	0.016	0.095	0.103	0.099	0.097	0.105	0.011	0.019	0.016	0.013	0.021	0.007	0.015	0.012	0.009	0.018	0.033	0.041	0.038	0.035	0.044
CPI-SS0111AAD26	EPHB2_EFNB1	simple:P29323	simple:P98172	EPHB2	EFNB1	FALSE	TRUE	FALSE	curated	FALSE	0.046	0.054	0.051	0.048	0.057	0.698	0.705	0.702	0.7	0.708	0.073	0.081	0.078	0.075	0.083	0.046	0.054	0.051	0.048	0.057	0.142	0.15	0.147	0.144	0.153
CPI-SS0FF55B42C	EPHB3_EFNB1	simple:P54753	simple:P98172	EPHB3	EFNB1	FALSE	TRUE	FALSE	curated	FALSE	0.003	0.011	0.008	0.005	0.014	0.02	0.028	0.025	0.022	0.03	0.035	0.043	0.04	0.038	0.046	0.003	0.011	0.008	0.006	0.014	0.028	0.036	0.033	0.03	0.039
CPI-SS0F21D6CA0	EPHB4_EFNB1	simple:P54760	simple:P98172	EPHB4	EFNB1	FALSE	TRUE	FALSE	curated	FALSE	0.002	0.01	0.007	0.004	0.013	0.006	0.014	0.011	0.008	0.017	0.037	0.045	0.042	0.039	0.047	0	0	0	0	0	0.004	0.012	0.009	0.006	0.015
CPI-SS0470AF83E	EPHB1_EFNB1	simple:P54762	simple:P98172	EPHB1	EFNB1	FALSE	TRUE	FALSE	curated	FALSE	1.364	1.372	1.369	1.366	1.374	1.252	1.26	1.257	1.254	1.263	0.275	0.282	0.279	0.277	0.285	0.192	0.2	0.197	0.194	0.202	0.589	0.597	0.594	0.591	0.6
CPI-SS00046DCF3	EPHA4_EFNB1	simple:P54764	simple:P98172	EPHA4	EFNB1	FALSE	TRUE	FALSE	curated	FALSE	0.149	0.157	0.153	0.151	0.159	0.718	0.726	0.723	0.721	0.729	0.748	0.756	0.752	0.75	0.758	0.089	0.097	0.094	0.091	0.099	0.179	0.187	0.184	0.181	0.189
CPI-SS08718E4FB	EPHB6_EFNB3	simple:O15197	simple:Q15768	EPHB6	EFNB3	TRUE	TRUE	TRUE	curated	FALSE	0.266	0.065	0.051	0.045	0.05	0.355	0.154	0.141	0.135	0.139	0.272	0.07	0.057	0.051	0.055	0.268	0.067	0.054	0.047	0.052	0.294	0.093	0.08	0.073	0.078
CPI-SS0DA366C78	EPHB2_EFNB3	simple:P29323	simple:Q15768	EPHB2	EFNB3	FALSE	TRUE	TRUE	curated	FALSE	0.307	0.106	0.092	0.086	0.091	0.958	0.757	0.744	0.738	0.742	0.334	0.132	0.119	0.113	0.117	0.307	0.106	0.092	0.086	0.091	0.403	0.202	0.189	0.183	0.187
CPI-SS0A5B945E3	EPHB3_EFNB3	simple:P54753	simple:Q15768	EPHB3	EFNB3	FALSE	TRUE	TRUE	curated	FALSE	0.264	0.063	0.05	0.043	0.048	0.281	0.08	0.066	0.06	0.064	0.296	0.095	0.082	0.076	0.08	0.264	0.063	0.05	0.044	0.048	0.289	0.088	0.075	0.068	0.073
CPI-SS0865716E5	EPHB4_EFNB3	simple:P54760	simple:Q15768	EPHB4	EFNB3	FALSE	TRUE	TRUE	curated	FALSE	0.263	0.062	0.048	0.042	0.046	0.267	0.066	0.052	0.046	0.051	0.298	0.097	0.083	0.077	0.081	0	0	0	0	0	0.265	0.064	0.05	0.044	0.049
CPI-SS0D41C7AF5	EPHB1_EFNB3	simple:P54762	simple:Q15768	EPHB1	EFNB3	FALSE	TRUE	TRUE	curated	FALSE	1.625	1.423	1.41	1.404	1.408	1.513	1.312	1.299	1.293	1.297	0.535	0.334	0.321	0.315	0.319	0.453	0.251	0.238	0.232	0.236	0.85	0.649	0.635	0.629	0.633
CPI-SS07CA5A6F1	EPHA4_EFNB3	simple:P54764	simple:Q15768	EPHA4	EFNB3	FALSE	TRUE	TRUE	curated	FALSE	0.409	0.208	0.195	0.189	0.193	0.979	0.778	0.765	0.759	0.763	1.009	0.807	0.794	0.788	0.792	0.35	0.148	0.135	0.129	0.133	0.44	0.238	0.225	0.219	0.223
CPI-SS087A17AD6	EPO_EPOR	simple:P01588	simple:P19235	EPO	EPOR	TRUE	FALSE	TRUE	curated	FALSE	0.011	0.015	0.013	0.012	0	0.054	0.058	0.055	0.055	0	0.021	0.025	0.023	0.022	0	0.015	0.019	0.016	0.016	0	0.017	0.021	0.018	0.018	0
CPI-SS0A0DE9CD6	EPO_EPHB4	simple:P01588	simple:P54760	EPO	EPHB4	TRUE	FALSE	TRUE	IMEx,InnateDB-All,IntAct	FALSE	0.012	0.016	0.047	0	0.014	0.054	0.058	0.089	0	0.056	0.022	0.026	0.056	0	0.024	0.015	0.019	0.05	0	0.017	0.017	0.021	0.052	0	0.019
CPI-SS08D0F9109	EFNB2_EPHB4	simple:P52799	simple:P54760	EFNB2	EPHB4	FALSE	TRUE	TRUE	curated	FALSE	0.01	0.014	0.045	0	0.012	0.151	0.155	0.185	0	0.153	0.024	0.028	0.059	0	0.026	0.014	0.018	0.049	0	0.016	0.015	0.019	0.05	0	0.017
CPI-SS0586F2596	EPHB2_EFNA5	simple:P29323	simple:P52803	EPHB2	EFNA5	FALSE	TRUE	FALSE	curated	FALSE	0.119	2.792	0.412	0.232	0.168	0.77	3.444	1.063	0.883	0.82	0.146	2.819	0.439	0.259	0.195	0.119	2.792	0.412	0.232	0.168	0.215	2.889	0.508	0.328	0.265
CPI-SS03A2EFDD5	EPHA1_EFNA5	simple:P21709	simple:P52803	EPHA1	EFNA5	FALSE	TRUE	FALSE	curated	FALSE	0.077	2.751	0.371	0.191	0.127	0.08	2.754	0.373	0.193	0.13	0.075	2.749	0.368	0.188	0.124	0.078	2.752	0.371	0.191	0.127	0.082	2.755	0.375	0.195	0.131
CPI-SS02AFCED82	EPHA2_EFNA5	simple:P29317	simple:P52803	EPHA2	EFNA5	FALSE	TRUE	FALSE	curated	FALSE	0	0	0	0	0	0.076	2.749	0.369	0.189	0.125	0	0	0	0	0	0.08	2.753	0.373	0.193	0.129	0	0	0	0	0
CPI-SS0BEAB521F	EPHA3_EFNA5	simple:P29320	simple:P52803	EPHA3	EFNA5	TRUE	TRUE	FALSE	curated	FALSE	0.089	2.762	0.382	0.202	0.138	0.487	3.161	0.78	0.6	0.537	0.11	2.784	0.403	0.223	0.16	0.106	2.779	0.399	0.219	0.155	0.12	2.794	0.414	0.234	0.17
CPI-SS012CCE326	EPHA8_EFNA5	simple:P29322	simple:P52803	EPHA8	EFNA5	FALSE	TRUE	FALSE	curated	FALSE	0.075	2.749	0.368	0.188	0.125	0.108	2.782	0.401	0.221	0.158	0.081	2.755	0.374	0.194	0.131	0.078	2.752	0.371	0.191	0.127	0	0	0	0	0
CPI-SS082ABF1EA	EFNB2_EPHB3	simple:P52799	simple:P54753	EFNB2	EPHB3	FALSE	TRUE	TRUE	curated	FALSE	0.011	0.028	0.044	0.012	0.037	0.152	0.168	0.184	0.152	0.177	0.025	0.042	0.057	0.025	0.05	0.016	0.032	0.048	0.016	0.041	0.016	0.033	0.048	0.016	0.041
CPI-SS0BFD8E056	EFNB2_EPHB1	simple:P52799	simple:P54762	EFNB2	EPHB1	FALSE	TRUE	TRUE	curated	FALSE	1.372	1.261	0.283	0.2	0.597	1.512	1.401	0.423	0.34	0.738	1.385	1.274	0.296	0.213	0.611	1.376	1.265	0.287	0.204	0.601	1.377	1.265	0.287	0.205	0.602
CPI-SS01A8F745A	EPHA1_EFNA3	simple:P21709	simple:P52797	EPHA1	EFNA3	FALSE	TRUE	FALSE	curated	FALSE	0.007	0.078	0.012	0.009	0.006	0.01	0.081	0.015	0.012	0.008	0.005	0.076	0.01	0.006	0.003	0.008	0.079	0.013	0.009	0.006	0.012	0.082	0.016	0.013	0.01
CPI-SS07BECB892	EPHA2_EFNA3	simple:P29317	simple:P52797	EPHA2	EFNA3	FALSE	TRUE	FALSE	curated	FALSE	0	0	0	0	0	0.006	0.076	0.011	0.007	0.004	0	0	0	0	0	0.01	0.081	0.015	0.011	0.008	0	0	0	0	0
CPI-SS0AB0604B5	EPHA3_EFNA3	simple:P29320	simple:P52797	EPHA3	EFNA3	TRUE	TRUE	FALSE	curated	FALSE	0.019	0.09	0.024	0.02	0.017	0.417	0.488	0.422	0.418	0.415	0.04	0.111	0.045	0.042	0.038	0.036	0.107	0.041	0.037	0.034	0.05	0.121	0.055	0.052	0.049
CPI-SS0DF162C10	EPHA8_EFNA3	simple:P29322	simple:P52797	EPHA8	EFNA3	FALSE	TRUE	FALSE	curated	FALSE	0.005	0.076	0.01	0.006	0.003	0.038	0.109	0.043	0.039	0.036	0.011	0.082	0.016	0.013	0.009	0.008	0.079	0.013	0.009	0.006	0	0	0	0	0
CPI-SS05E6D620E	EPHA1_EFNA4	simple:P21709	simple:P52798	EPHA1	EFNA4	TRUE	TRUE	FALSE	curated	FALSE	0	0.004	0.006	0	0	0	0.007	0.009	0	0	0	0.001	0.004	0	0	0	0.004	0.007	0	0	0	0.008	0.01	0	0
CPI-SS09F973C1A	EPHA2_EFNA4	simple:P29317	simple:P52798	EPHA2	EFNA4	TRUE	TRUE	FALSE	curated	FALSE	0	0	0	0	0	0	0.002	0.004	0	0	0	0	0	0	0	0	0.006	0.008	0	0	0	0	0	0	0
CPI-SS041888D39	EPHA3_EFNA4	simple:P29320	simple:P52798	EPHA3	EFNA4	TRUE	TRUE	FALSE	curated	FALSE	0	0.015	0.017	0	0	0	0.413	0.416	0	0	0	0.037	0.039	0	0	0	0.032	0.034	0	0	0	0.047	0.049	0	0
CPI-SS02B285B4D	EPHA8_EFNA4	simple:P29322	simple:P52798	EPHA8	EFNA4	TRUE	TRUE	FALSE	curated	FALSE	0	0.001	0.004	0	0	0	0.034	0.037	0	0	0	0.008	0.01	0	0	0	0.004	0.007	0	0	0	0	0	0	0
CPI-SS04C396C5D	VGF_NTRK1	simple:O15240	simple:P04629	VGF	NTRK1	TRUE	FALSE	TRUE	InnateDB-All	FALSE	0.019	0.021	0	0	0	0.342	0.344	0	0	0	0.041	0.043	0	0	0	0.043	0.045	0	0	0	0.017	0.019	0	0	0
CPI-SS052127A00	NGF_NTRK1	simple:P01138	simple:P04629	NGF	NTRK1	TRUE	FALSE	TRUE	curated	FALSE	0.004	0.005	0	0	0	0.019	0.021	0	0	0	0.02	0.022	0	0	0	0	0	0	0	0	0.01	0.012	0	0	0
CPI-SS0EDD4928A	NGF_NGFR	simple:P01138	simple:P08138	NGF	NGFR	TRUE	FALSE	TRUE	curated	FALSE	0.007	0.006	0	0.004	0	0.022	0.021	0	0.02	0	0.023	0.022	0	0.021	0	0	0	0	0	0	0.013	0.012	0	0.011	0
CPI-SS0AB647854	GPR37_PSAP	simple:O15354	simple:P07602	GPR37	PSAP	TRUE	TRUE	FALSE	guidetopharmacology.org	FALSE	0.649	1.276	0.936	0.848	0.955	0.397	1.025	0.685	0.597	0.704	0.489	1.117	0.777	0.689	0.795	0.403	1.03	0.69	0.602	0.709	0.403	1.03	0.69	0.602	0.709
CPI-SS082900482	GPR37L1_PSAP	simple:O60883	simple:P07602	GPR37L1	PSAP	TRUE	TRUE	FALSE	guidetopharmacology.org	FALSE	0.335	0.963	0.623	0.535	0.642	0.342	0.97	0.63	0.542	0.649	0.858	1.485	1.146	1.058	1.164	0.331	0.958	0.619	0.531	0.637	0.701	1.328	0.989	0.901	1.007
CPI-SS0A915097A	GRIN2D_IL16	simple:O15399	simple:Q14005	GRIN2D	IL16	TRUE	TRUE	FALSE	I2D	FALSE	0.012	0.034	0.017	0.048	0.013	0.355	0.377	0.36	0.391	0.356	0.033	0.055	0.038	0.069	0.034	0.027	0.048	0.031	0.062	0.027	0.033	0.055	0.038	0.069	0.034
CPI-SS070B0E458	GRIN2A_IL16	simple:Q12879	simple:Q14005	GRIN2A	IL16	TRUE	TRUE	FALSE	I2D	FALSE	0.07	0.092	0.075	0.106	0.071	3.685	3.706	3.69	3.72	3.686	0.296	0.317	0.3	0.331	0.297	0.179	0.2	0.184	0.214	0.18	0.118	0.14	0.123	0.154	0.119
CPI-SS0D529E576	GRIN2B_IL16	simple:Q13224	simple:Q14005	GRIN2B	IL16	TRUE	TRUE	FALSE	I2D	FALSE	0.068	0.09	0.073	0.104	0.069	3.282	3.303	3.287	3.317	3.283	0.425	0.447	0.43	0.461	0.426	0.181	0.202	0.185	0.216	0.181	0.113	0.135	0.118	0.149	0.114
CPI-SS086615F9B	CSF1_CELSR3	simple:P09603	simple:Q9NYQ7	CSF1	CELSR3	TRUE	FALSE	TRUE	I2D	FALSE	0.135	0.305	0.145	0.141	0.154	0.054	0.223	0.063	0.059	0.072	0.058	0.228	0.068	0.063	0.077	0.037	0.207	0.047	0.043	0.056	0.078	0.248	0.088	0.084	0.097
CPI-SS04861AD1A	FGFR4_SCGB3A1	simple:P22455	simple:Q96QR1	FGFR4	SCGB3A1	TRUE	TRUE	FALSE	IMEx,InnateDB-All,MINT	FALSE	0	0.003	0	0	0	0	0.002	0	0	0	0	0	0	0	0	0	0	0	0	0	0	0	0	0	0
CPI-SS042EB8C7A	TBXA2R_GHRL	simple:P21731	simple:Q9UBU3	TBXA2R	GHRL	TRUE	TRUE	FALSE	InnateDB-All	FALSE	0.002	0.011	0.002	0.005	0	0.002	0.011	0.002	0.005	0	0.002	0.011	0.002	0.005	0	0	0	0	0	0	0	0	0	0	0
CPI-SS043E0F61D	PTGER3_GHRL	simple:P43115	simple:Q9UBU3	PTGER3	GHRL	TRUE	TRUE	FALSE	InnateDB-All	FALSE	0.003	0.012	0.003	0.006	0	0.032	0.041	0.032	0.035	0	0.004	0.013	0.004	0.007	0	0.004	0.013	0.004	0.007	0	0.009	0.018	0.009	0.012	0
CPI-SS07D40A3F3	GHSR_GHRL	simple:Q92847	simple:Q9UBU3	GHSR	GHRL	TRUE	TRUE	FALSE	guidetopharmacology.org	FALSE	0.002	0.011	0.002	0.005	0	0.006	0.015	0.006	0.009	0	0	0	0	0	0	0	0	0	0	0	0	0	0	0	0
CPI-SS085C150CE	ACE2_GHRL	simple:Q9BYF1	simple:Q9UBU3	ACE2	GHRL	TRUE	TRUE	FALSE	I2D	FALSE	0.002	0.011	0.002	0.005	0	0.002	0.011	0.002	0.005	0	0.002	0.011	0.002	0.005	0	0	0	0	0	0	0	0	0	0	0
CPI-SS0EB3C2743	GHSR_LEAP2	simple:Q92847	simple:Q969E1	GHSR	LEAP2	TRUE	TRUE	FALSE	guidetopharmacology.org	FALSE	0.001	0.001	0.001	0	0	0.005	0.005	0.005	0	0	0	0	0	0	0	0	0	0	0	0	0	0	0	0	0
CPI-SS079DDF890	TNFSF12_TNFRSF25	simple:O43508	simple:Q93038	TNFSF12	TNFRSF25	TRUE	FALSE	TRUE	I2D	FALSE	0.003	0.011	0.006	0.005	0.007	0.063	0.071	0.067	0.065	0.067	0.027	0.036	0.031	0.03	0.032	0.021	0.029	0.025	0.023	0.025	0.018	0.026	0.021	0.02	0.022
CPI-SS0B0CF0EDF	TNFSF15_TNFRSF25	simple:O95150	simple:Q93038	TNFSF15	TNFRSF25	TRUE	FALSE	TRUE	guidetopharmacology.org	FALSE	0.001	0.009	0.005	0.003	0.005	0.002	0.01	0.005	0.004	0.006	0	0	0	0	0	0	0	0	0	0	0	0	0	0	0
CPI-SS0D9EFC4F7	GNRH1_GNRHR	simple:P01148	simple:P30968	GNRH1	GNRHR	TRUE	FALSE	TRUE	I2D	FALSE	0.003	0.005	0	0	0	0.013	0.015	0	0	0	0.004	0.006	0	0	0	0.004	0.006	0	0	0	0	0	0	0	0
CPI-SS08A819670	CD70_GPRC5B	simple:P32970	simple:Q9NZH0	CD70	GPRC5B	TRUE	FALSE	TRUE	InnateDB-All	FALSE	0.272	0.401	0.301	0.078	0.109	0.273	0.402	0.302	0.08	0.111	0	0	0	0	0	0.274	0.402	0.302	0.08	0.111	0.282	0.41	0.31	0.088	0.119
CPI-SS084816B12	HCRT_HCRTR1	simple:O43612	simple:O43613	HCRT	HCRTR1	TRUE	FALSE	TRUE	guidetopharmacology.org	FALSE	0.002	0.024	0.006	0.002	0.003	0.004	0.026	0.008	0.004	0.005	0.002	0.024	0.006	0.003	0.003	0	0	0	0	0	0.006	0.028	0.01	0.007	0.007
CPI-SS02461AE98	HCRT_HCRTR2	simple:O43612	simple:O43614	HCRT	HCRTR2	TRUE	FALSE	TRUE	guidetopharmacology.org	FALSE	0.007	0.295	0.043	0.014	0.02	0.009	0.297	0.045	0.016	0.022	0.008	0.295	0.043	0.015	0.02	0	0	0	0	0	0.012	0.3	0.047	0.019	0.024
CPI-SS0B9B3870A	VEGFA_FLT1	simple:P15692	simple:P17948	VEGFA	FLT1	TRUE	FALSE	TRUE	curated	FALSE	0.037	0.073	0.038	0.045	0.037	0.184	0.219	0.184	0.192	0.184	0.897	0.932	0.897	0.904	0.897	0.022	0.057	0.022	0.03	0.022	0.755	0.79	0.755	0.763	0.755
CPI-SS02371A6D6	VEGFA_EPHB2	simple:P15692	simple:P29323	VEGFA	EPHB2	TRUE	FALSE	TRUE	I2D	FALSE	0.079	0.731	0.106	0.079	0.175	0.226	0.877	0.253	0.226	0.322	0.939	1.59	0.965	0.939	1.035	0.064	0.715	0.091	0.064	0.16	0.797	1.448	0.824	0.797	0.893
CPI-SS0C694CB44	VEGFA_GRIN2B	simple:P15692	simple:Q13224	VEGFA	GRIN2B	TRUE	FALSE	TRUE	I2D	FALSE	0.102	3.315	0.459	0.214	0.146	0.248	3.461	0.605	0.36	0.293	0.961	4.174	1.318	1.073	1.006	0.086	3.3	0.443	0.199	0.131	0.819	4.033	1.176	0.931	0.864
CPI-SS082AD7B6A	FZD6_WNT5A	simple:O60353	simple:P41221	FZD6	WNT5A	TRUE	TRUE	FALSE	curated	FALSE	0.004	0.063	0.022	0.004	0.008	0.014	0.073	0.032	0.014	0.018	0.032	0.091	0.051	0.033	0.036	0.004	0.063	0.023	0.005	0.008	0.011	0.069	0.029	0.011	0.015
CPI-SC0FDB4B6D9	GDF9_TGFR_BMPR2	simple:O60383	complex:TGFR_BMPR2	GDF9		TRUE	FALSE	TRUE	curated	FALSE	0.083	0.193	0.143	0.364	0.247	0.082	0.192	0.142	0.363	0.246	0.089	0.199	0.149	0.37	0.253	0.086	0.196	0.146	0.367	0.25	0.093	0.204	0.153	0.375	0.257
CPI-SS02B567BC7	PLXNC1_SEMA7A	simple:O60486	simple:O75326	PLXNC1	SEMA7A	FALSE	TRUE	FALSE	curated	FALSE	0.067	0.189	0.048	0.038	0.059	0.319	0.441	0.3	0.289	0.311	0.09	0.212	0.071	0.061	0.082	0.078	0.2	0.059	0.048	0.07	0.168	0.29	0.149	0.139	0.16
CPI-SS070C51D94	FZD7_WNT3	simple:O75084	simple:P56703	FZD7	WNT3	TRUE	TRUE	FALSE	curated	FALSE	0.028	0.02	0.014	0.014	0	0.023	0.014	0.009	0.008	0	0.033	0.025	0.019	0.019	0	0.025	0.017	0.011	0.01	0	0.021	0.012	0.007	0.006	0
CPI-SS0A4EE6FE1	LRP5_FAM3B	simple:O75197	simple:P58499	LRP5	FAM3B	TRUE	TRUE	FALSE	InnateDB-All	FALSE	0	0.002	0	0	0	0	0.019	0	0	0	0	0.078	0	0	0	0	0.156	0	0	0	0	0.148	0	0	0
CPI-SS05E001125	LGR5_RSPO4	simple:O75473	simple:Q2I0M5	LGR5	RSPO4	TRUE	TRUE	FALSE	guidetopharmacology.org	FALSE	0	0.025	0	0	0	0	0.929	0	0	0	0	0.081	0	0	0	0	0.046	0	0	0	0	0.297	0	0	0
CPI-SS0F102AAC5	LGR5_RSPO1	simple:O75473	simple:Q2MKA7	LGR5	RSPO1	TRUE	TRUE	FALSE	guidetopharmacology.org	FALSE	0.024	0.037	0.025	0.029	0	0.928	0.941	0.929	0.933	0	0.081	0.093	0.082	0.086	0	0.045	0.058	0.046	0.05	0	0.297	0.309	0.298	0.302	0
CPI-SS0FC0CA5ED	LGR5_RSPO2	simple:O75473	simple:Q6UXX9	LGR5	RSPO2	TRUE	TRUE	FALSE	guidetopharmacology.org	FALSE	0.027	0.094	0.029	0.029	0	0.932	0.998	0.933	0.933	0	0.084	0.151	0.086	0.086	0	0.048	0.115	0.05	0.05	0	0.3	0.366	0.302	0.302	0
CPI-SS0DCA749B0	LGR5_RSPO3	simple:O75473	simple:Q9BXY4	LGR5	RSPO3	TRUE	TRUE	FALSE	guidetopharmacology.org	FALSE	0.027	0.143	0.049	0.034	0.028	0.931	1.048	0.953	0.938	0.933	0.084	0.2	0.106	0.091	0.085	0.048	0.164	0.07	0.055	0.049	0.3	0.416	0.322	0.306	0.301
CPI-SS0A874F65F	LGR4_RSPO3	simple:Q9BXB1	simple:Q9BXY4	LGR4	RSPO3	TRUE	TRUE	FALSE	guidetopharmacology.org	FALSE	0.176	0.292	0.198	0.182	0.177	0.695	0.811	0.717	0.701	0.696	0.435	0.552	0.457	0.442	0.436	0.065	0.181	0.087	0.071	0.066	0.084	0.2	0.105	0.09	0.085
CPI-SS05B1FA8A8	LRP6_CKLF	simple:O75581	simple:Q9UBR5	LRP6	CKLF	TRUE	TRUE	FALSE	IMEx,IntAct	FALSE	0.182	0.239	0.219	0.214	0.221	0.812	0.87	0.849	0.845	0.851	0.448	0.505	0.484	0.48	0.486	0.263	0.32	0.3	0.295	0.302	0.529	0.586	0.566	0.561	0.568
CPI-SS05162C56B	NTF3_NTRK3	simple:P20783	simple:Q16288	NTF3	NTRK3	TRUE	FALSE	TRUE	curated	FALSE	0	0	0	0	0	0.081	3.217	1.813	0.192	1.682	0	0	0	0	0	0	0	0	0	0	0	0	0	0	0
CPI-SS065F7DA2A	COPA_P2RY6	simple:P53621	simple:Q15077	COPA	P2RY6	TRUE	FALSE	TRUE	IMEx,IntAct	FALSE	0.137	0.137	0.138	0.35	0.143	0.574	0.574	0.576	0.788	0.581	0.211	0.211	0.212	0.424	0.217	0.168	0.168	0.169	0.381	0.174	0.214	0.214	0.216	0.428	0.221
CPI-SS09A3FA737	NAMPT_P2RY6	simple:P43490	simple:Q15077	NAMPT	P2RY6	TRUE	FALSE	TRUE	IMEx,IntAct	FALSE	0.071	0.071	0.073	0.285	0.078	0.243	0.243	0.244	0.457	0.25	0.072	0.072	0.073	0.286	0.079	0.057	0.057	0.059	0.271	0.064	0.091	0.091	0.092	0.304	0.097
CPI-SS0BE567EFB	GAL_GALR1	simple:P22466	simple:P47211	GAL	GALR1	TRUE	FALSE	TRUE	guidetopharmacology.org	FALSE	0.004	0.017	0.006	0.007	0.006	0.032	0.044	0.033	0.034	0.034	0.003	0.016	0.005	0.006	0.005	0.002	0.015	0.004	0.005	0.004	0.005	0.018	0.007	0.008	0.007
CPI-SS03E48EFEA	C3_C3AR1	simple:P01024	simple:Q16581	C3	C3AR1	TRUE	FALSE	TRUE	guidetopharmacology.org	FALSE	0.001	0.004	0.003	0.083	0	0.004	0.006	0.005	0.085	0	0.01	0.012	0.011	0.092	0	0.004	0.007	0.006	0.086	0	0.003	0.006	0.005	0.085	0
CPI-SS03E273233	ADORA2A_ENTPD1	simple:P29274	simple:P49961	ADORA2A	ENTPD1	FALSE	TRUE	FALSE	curated	FALSE	0.005	0.026	0.128	0.776	0.129	0.006	0.027	0.128	0.776	0.129	0.01	0.031	0.133	0.78	0.134	0	0	0	0	0	0.007	0.028	0.13	0.778	0.131
CPI-SS0FF6CFDCA	ADORA3_ENTPD1	simple:P0DMS8	simple:P49961	ADORA3	ENTPD1	FALSE	TRUE	FALSE	curated	FALSE	0.005	0.026	0.128	0.776	0.129	0.005	0.026	0.128	0.776	0.129	0	0	0	0	0	0.04	0.061	0.163	0.811	0.164	0	0	0	0	0
CPI-SS079728E8B	ADORA2B_ENTPD1	simple:P29275	simple:P49961	ADORA2B	ENTPD1	FALSE	TRUE	FALSE	curated	FALSE	0.008	0.029	0.13	0.778	0.131	0.047	0.068	0.17	0.818	0.171	0.045	0.066	0.168	0.816	0.169	0.007	0.028	0.129	0.777	0.13	0.046	0.067	0.169	0.817	0.17
CPI-SS03E7587E4	ADORA1_ENTPD1	simple:P30542	simple:P49961	ADORA1	ENTPD1	FALSE	TRUE	FALSE	curated	FALSE	0.098	0.119	0.221	0.869	0.222	0.181	0.203	0.304	0.952	0.305	0.177	0.198	0.3	0.948	0.301	0.028	0.049	0.151	0.799	0.152	0.175	0.196	0.298	0.945	0.299
CPI-SS05996C8FD	AGT_AGTR1	simple:P01019	simple:P30556	AGT	AGTR1	TRUE	FALSE	TRUE	guidetopharmacology.org	FALSE	0.008	0.014	0.009	0	0.018	0.011	0.016	0.011	0	0.02	0.35	0.356	0.35	0	0.359	0.005	0.01	0.005	0	0.014	0.01	0.015	0.01	0	0.019
CPI-SS069924427	AGT_AGTR2	simple:P01019	simple:P50052	AGT	AGTR2	TRUE	FALSE	TRUE	guidetopharmacology.org	FALSE	0.01	0.029	0.013	0.01	0.01	0.012	0.031	0.015	0.012	0.013	0.352	0.371	0.355	0.352	0.352	0.007	0.026	0.01	0.006	0.007	0.012	0.031	0.015	0.012	0.012
CPI-SS00581282E	C5_C5AR1	simple:P01031	simple:P21730	C5	C5AR1	TRUE	FALSE	TRUE	guidetopharmacology.org	FALSE	0	0	0	0	0	0.002	0.002	0	0.046	0.004	0.002	0.002	0	0.046	0.004	0	0	0	0	0	0	0	0	0	0
CPI-SS0A7E3A1AF	C5_C5AR2	simple:P01031	simple:Q9P296	C5	C5AR2	TRUE	FALSE	TRUE	guidetopharmacology.org	FALSE	0	0	0	0	0	0.002	0.002	0.004	0.032	0	0.002	0.002	0.004	0.032	0	0	0	0	0	0	0	0	0	0	0
CPI-SS075D9B9AD	KNG1_BDKRB1	simple:P01042	simple:P46663	KNG1	BDKRB1	TRUE	FALSE	TRUE	guidetopharmacology.org	FALSE	0	0	0	0	0	0	0.001	0	0	0	0	0	0	0	0	0	0	0	0	0	0	0	0	0	0
CPI-SS0C7833961	TSHB_TSHR	simple:P01222	simple:P16473	TSHB	TSHR	TRUE	FALSE	TRUE	I2D	FALSE	0.014	0.044	0.017	0.011	0.024	0.007	0.037	0.01	0.004	0.017	0	0	0	0	0	0.005	0.035	0.008	0.002	0.015	0.012	0.041	0.014	0.008	0.022
CPI-SS01963C4CA	TG_ASGR1	simple:P01266	simple:P07306	TG	ASGR1	TRUE	FALSE	TRUE	I2D	FALSE	0.001	0.001	0	0	0	0.002	0.002	0	0	0	0.002	0.002	0	0	0	0.078	0.078	0	0	0	0	0	0	0	0
CPI-SS012B216F6	PTHLH_PTH2R	simple:P12272	simple:P49190	PTHLH	PTH2R	TRUE	FALSE	TRUE	guidetopharmacology.org	FALSE	0.002	0.011	0.004	0	0	0.005	0.014	0.008	0	0	0	0	0	0	0	0	0	0	0	0	0	0	0	0	0
CPI-SS0483CE4ED	PTHLH_PTH1R	simple:P12272	simple:Q03431	PTHLH	PTH1R	TRUE	FALSE	TRUE	guidetopharmacology.org	FALSE	0.003	0.042	0.038	0.011	0.056	0.007	0.046	0.041	0.015	0.06	0	0	0	0	0	0	0	0	0	0	0	0	0	0	0
CPI-SS0C6448B94	IL1B_ADRB2	simple:P01584	simple:P07550	IL1B	ADRB2	TRUE	FALSE	TRUE	I2D	FALSE	0	0	0	0	0	0.001	0	0.001	0.024	0	0	0	0	0	0	0.004	0.004	0.004	0.028	0	0	0	0	0	0
CPI-SS0F739D3DB	ANXA1_FPR1	simple:P04083	simple:P21462	ANXA1	FPR1	TRUE	FALSE	TRUE	guidetopharmacology.org	FALSE	0.001	0.069	0.007	0.006	0.003	0.001	0.07	0.008	0.006	0.003	0	0	0	0	0	0.003	0.072	0.01	0.008	0.005	0.003	0.072	0.009	0.008	0.005
CPI-SS030BB46BB	ANXA1_FPR2	simple:P04083	simple:P25090	ANXA1	FPR2	TRUE	FALSE	TRUE	curated	FALSE	0.001	0.013	0.002	0.002	0	0.002	0.013	0.003	0.003	0	0	0	0	0	0	0.004	0.015	0.005	0.005	0	0.003	0.015	0.005	0.004	0
CPI-SS0F66EA6BE	APP_FPR2	simple:P05067	simple:P25090	APP	FPR2	FALSE	FALSE	TRUE	guidetopharmacology.org	FALSE	2.796	2.808	2.798	2.797	0	5.119	5.131	5.12	5.12	0	1.003	1.015	1.004	1.004	0	0.912	0.923	0.913	0.913	0	1.858	1.869	1.859	1.859	0
CPI-SS0D3A5646A	RLN1_RXFP2	simple:P04808	simple:Q8WXD0	RLN1	RXFP2	TRUE	FALSE	TRUE	guidetopharmacology.org	FALSE	0.001	0.018	0.002	0	0	0.001	0.018	0.002	0	0	0	0	0	0	0	0	0	0	0	0	0	0	0	0	0
CPI-SS0FAE75A75	RLN1_RXFP1	simple:P04808	simple:Q9HBX9	RLN1	RXFP1	TRUE	FALSE	TRUE	guidetopharmacology.org	FALSE	0.009	0.092	0.015	0.006	0.017	0.009	0.092	0.016	0.006	0.018	0	0	0	0	0	0	0	0	0	0	0	0	0	0	0
CPI-SS031E35270	RLN3_RXFP1	simple:Q8WXF3	simple:Q9HBX9	RLN3	RXFP1	TRUE	FALSE	TRUE	guidetopharmacology.org	FALSE	0.009	0.091	0.015	0.006	0.017	0.009	0.092	0.015	0.006	0.017	0	0	0	0	0	0	0	0	0	0	0	0	0	0	0
CPI-SS0431D2256	TNFSF9_TNFRSF9	simple:P41273	simple:Q07011	TNFSF9	TNFRSF9	TRUE	FALSE	TRUE	curated	FALSE	0.004	0.019	0.007	0	0.008	0.004	0.019	0.007	0	0.008	0	0	0	0	0	0.004	0.019	0.007	0	0.008	0.013	0.028	0.016	0	0.017
CPI-SS0DC2A6D35	IL6_HRH1	simple:P05231	simple:P35367	IL6	HRH1	TRUE	FALSE	TRUE	IMEx,InnateDB-All,IntAct	FALSE	0.002	0.015	0.261	0.004	0.117	0.004	0.016	0.263	0.006	0.118	0	0	0	0	0	0.009	0.022	0.268	0.011	0.124	0	0	0	0	0
CPI-SS0A05319F5	CRH_CRHR2	simple:P06850	simple:Q13324	CRH	CRHR2	TRUE	FALSE	TRUE	I2D,InnateDB-All	FALSE	0	0.001	0	0	0	0	0.002	0	0	0	0	0	0	0	0	0	0	0	0	0	0	0	0	0	0
CPI-SS0E654708F	UCN_CRHR2	simple:P55089	simple:Q13324	UCN	CRHR2	TRUE	FALSE	TRUE	guidetopharmacology.org	FALSE	0	0.002	0	0	0	0	0.002	0	0	0	0	0.002	0	0	0	0	0	0	0	0	0	0	0	0	0
CPI-SS0C85BC9AF	PROS1_AXL	simple:P07225	simple:P30530	PROS1	AXL	TRUE	FALSE	TRUE	guidetopharmacology.org	FALSE	0.013	0.037	0.133	0.044	0.07	0.042	0.065	0.162	0.073	0.099	0.109	0.132	0.228	0.14	0.165	0.395	0.418	0.515	0.426	0.452	0.069	0.093	0.189	0.1	0.126
CPI-SS09C4988F8	PROS1_TYRO3	simple:P07225	simple:Q06418	PROS1	TYRO3	TRUE	FALSE	TRUE	guidetopharmacology.org	FALSE	0.151	0.111	0.043	0.039	0.07	0.18	0.139	0.071	0.067	0.099	0.247	0.206	0.138	0.134	0.165	0.533	0.492	0.424	0.42	0.452	0.207	0.167	0.099	0.095	0.126
CPI-SS0B01CF3AB	CSF1R_CSF1	simple:P07333	simple:P09603	CSF1R	CSF1	TRUE	TRUE	FALSE	curated	FALSE	0.14	0.058	0.063	0.042	0.083	0.151	0.069	0.074	0.053	0.094	0.158	0.076	0.08	0.06	0.101	1.201	1.119	1.124	1.103	1.144	0.156	0.075	0.079	0.059	0.1
CPI-SS0DFA98A14	CSF1R_IL34	simple:P07333	simple:Q6ZMJ4	CSF1R	IL34	TRUE	TRUE	FALSE	curated	FALSE	0.013	0.059	0.016	0.013	0.035	0.024	0.07	0.027	0.024	0.045	0.031	0.076	0.034	0.031	0.052	1.074	1.12	1.077	1.074	1.095	0.03	0.075	0.033	0.03	0.051
CPI-SS07AF9303D	GRP_GRPR	simple:P07492	simple:P30550	GRP	GRPR	TRUE	FALSE	TRUE	guidetopharmacology.org	FALSE	0.002	0.009	0.005	0	0	0.013	0.019	0.015	0	0	0.003	0.01	0.006	0	0	0.003	0.01	0.006	0	0	0.012	0.019	0.015	0	0
CPI-SS061A7E099	CD55_ADGRE5	simple:P08174	simple:P48960	CD55	ADGRE5	TRUE	TRUE	TRUE	curated	FALSE	0.011	0.028	0.049	0.014	0.015	0.088	0.105	0.126	0.091	0.092	0.012	0.029	0.05	0.015	0.016	0.007	0.024	0.045	0.01	0.011	0.008	0.025	0.046	0.011	0.012
CPI-SS0CBC7840D	PTPRC_CD22	simple:P08575	simple:P20273	PTPRC	CD22	FALSE	FALSE	TRUE	curated	FALSE	0.003	0.003	0	0.015	0	0.008	0.009	0	0.02	0	0.014	0.015	0	0.026	0	0.773	0.773	0	0.785	0	0.005	0.005	0	0.017	0
CPI-SS0822AEF5F	PTPRC_MRC1	simple:P08575	simple:P22897	PTPRC	MRC1	FALSE	FALSE	TRUE	curated	FALSE	0.003	0.006	0.006	0.09	0.017	0.008	0.011	0.012	0.095	0.023	0.014	0.017	0.018	0.101	0.029	0.773	0.776	0.776	0.86	0.787	0.005	0.008	0.008	0.092	0.019
CPI-SS07F60834D	MET_HGF	simple:P08581	simple:P14210	MET	HGF	TRUE	TRUE	FALSE	curated	FALSE	0.005	0.024	0.005	0.022	0.006	0.049	0.068	0.049	0.066	0.051	0.009	0.029	0.009	0.026	0.011	0.005	0.024	0.004	0.021	0.006	0.003	0.022	0.003	0.02	0.005
CPI-SS056FF4363	CD48_CD244	simple:P09326	simple:Q9BZW8	CD48	CD244	FALSE	FALSE	TRUE	curated	FALSE	0.001	0.001	0.001	0.024	0	0.001	0.001	0.002	0.024	0	0.001	0.001	0.001	0.024	0	0.071	0.071	0.071	0.094	0	0	0	0	0	0
CPI-SS0D954EA1C	PDGFRB_PDGFD	simple:P09619	simple:Q9GZP0	PDGFRB	PDGFD	TRUE	TRUE	FALSE	curated	FALSE	0.015	0.209	1.36	0.014	0.115	0.029	0.223	1.373	0.027	0.128	0.093	0.288	1.438	0.092	0.193	0.017	0.211	1.362	0.016	0.117	0	0	0	0	0
CPI-CS0BAF97962	PDGFR complex_PDGFD	complex:PDGFR complex	simple:Q9GZP0		PDGFD	TRUE	TRUE	FALSE	curated	FALSE	0.015	0.209	1.36	0.014	0.115	0.029	0.223	1.373	0.027	0.128	0.027	0.221	1.372	0.026	0.127	0.017	0.211	1.362	0.016	0.117	0	0	0	0	0
CPI-SS080611C5B	ALOX5_ALOX5AP	simple:P09917	simple:P20292	ALOX5	ALOX5AP	FALSE	FALSE	FALSE	guidetopharmacology.org	FALSE	0.004	0.006	0.005	0.06	0.005	0.013	0.016	0.015	0.07	0.015	0.003	0.005	0.004	0.059	0.005	0.053	0.056	0.055	0.109	0.055	0.003	0.006	0.005	0.059	0.005
CPI-SS0270A2CA9	NPS_NPSR1	simple:P0C0P6	simple:Q6W5P4	NPS	NPSR1	TRUE	FALSE	TRUE	guidetopharmacology.org	FALSE	0.004	0.039	0.003	0.005	0	0	0	0	0	0	0.004	0.039	0.004	0.005	0	0	0	0	0	0	0	0	0	0	0
CPI-SS02D7A1DDE	KIT_KITLG	simple:P10721	simple:P21583	KIT	KITLG	TRUE	TRUE	FALSE	curated	FALSE	0.023	0.196	0.043	0.124	0.027	0.059	0.232	0.079	0.16	0.063	0.021	0.193	0.041	0.121	0.025	0.011	0.184	0.031	0.111	0.015	0.1	0.273	0.12	0.201	0.104
CPI-SS0EDAE16B6	EPOR_KITLG	simple:P19235	simple:P21583	EPOR	KITLG	TRUE	TRUE	FALSE	I2D	FALSE	0.008	0.181	0.028	0.109	0.012	0.012	0.185	0.032	0.112	0.016	0.009	0.182	0.03	0.11	0.014	0.009	0.182	0.029	0.109	0.013	0	0	0	0	0
CPI-SS07327E587	CD28_CD80	simple:P10747	simple:P33681	CD28	CD80	FALSE	FALSE	TRUE	curated	FALSE	0.004	0.038	0.009	0.048	0.005	0.004	0.038	0.01	0.049	0.005	0	0	0	0	0	0.007	0.042	0.013	0.052	0.009	0.006	0.04	0.012	0.051	0.007
CPI-SS0320FFAFC	CTLA4_CD80	simple:P16410	simple:P33681	CTLA4	CD80	FALSE	FALSE	TRUE	curated	FALSE	0.004	0.038	0.01	0.049	0.005	0.005	0.039	0.011	0.05	0.006	0	0	0	0	0	0.006	0.041	0.012	0.051	0.008	0	0	0	0	0
CPI-SS077D7365D	CD28_CD86	simple:P10747	simple:P42081	CD28	CD86	FALSE	FALSE	TRUE	curated	FALSE	0.006	0.003	0.002	0.305	0.007	0.006	0.003	0.003	0.306	0.008	0	0	0	0	0	0.01	0.007	0.006	0.309	0.011	0.008	0.005	0.005	0.308	0.01
CPI-SS0B0E09B1C	CTLA4_CD86	simple:P16410	simple:P42081	CTLA4	CD86	FALSE	FALSE	TRUE	curated	FALSE	0.006	0.003	0.003	0.306	0.008	0.008	0.005	0.004	0.307	0.009	0	0	0	0	0	0.009	0.006	0.005	0.308	0.01	0	0	0	0	0
CPI-SS0EB5AEC83	SELL_CD34	simple:P14151	simple:P28906	SELL	CD34	FALSE	FALSE	FALSE	curated	FALSE	0.003	0.007	0.004	0.101	0.005	0.003	0.007	0.004	0.101	0.005	0	0	0	0	0	0.008	0.012	0.009	0.107	0.01	0	0	0	0	0
CPI-SS087321EB5	SELL_SELPLG	simple:P14151	simple:Q14242	SELL	SELPLG	FALSE	FALSE	TRUE	curated	FALSE	0.004	0.007	0.013	0.639	0.02	0.004	0.007	0.014	0.639	0.02	0	0	0	0	0	0.01	0.013	0.019	0.645	0.025	0	0	0	0	0
CPI-SS08E6EA18C	NPR1_NPPB	simple:P16066	simple:P16860	NPR1	NPPB	TRUE	TRUE	FALSE	guidetopharmacology.org	FALSE	0.002	0.003	0	0	0	0.004	0.004	0	0	0	0	0	0	0	0	0.001	0.002	0	0	0	0.003	0.003	0	0	0
CPI-SS0A1864A37	NPR1_NPPC	simple:P16066	simple:P23582	NPR1	NPPC	TRUE	TRUE	FALSE	InnateDB-All	FALSE	0.006	0.025	0.007	0.003	0.004	0.008	0.027	0.009	0.005	0.006	0	0	0	0	0	0.005	0.024	0.006	0.002	0.003	0.007	0.025	0.007	0.003	0.005
CPI-SS0EB4002A2	NPR3_NPPC	simple:P17342	simple:P23582	NPR3	NPPC	TRUE	TRUE	FALSE	I2D,InnateDB-All	FALSE	0.006	0.024	0.006	0.002	0.004	0.02	0.039	0.021	0.017	0.018	0.005	0.024	0.006	0.002	0.003	0.005	0.024	0.006	0.002	0.003	0	0	0	0	0
CPI-SS06B94F144	NPR2_NPPC	simple:P20594	simple:P23582	NPR2	NPPC	TRUE	TRUE	FALSE	guidetopharmacology.org	FALSE	0.01	0.029	0.011	0.007	0.008	0.17	0.188	0.17	0.166	0.168	0.078	0.097	0.079	0.075	0.076	0.019	0.038	0.02	0.016	0.017	0.05	0.069	0.051	0.047	0.049
CPI-SS03CC15FF3	PDGFRA_PDGFC	simple:P16234	simple:Q9NRA1	PDGFRA	PDGFC	TRUE	TRUE	FALSE	curated	FALSE	0.067	0.227	0.167	0.037	0.119	0.08	0.241	0.181	0.051	0.133	0.072	0.232	0.172	0.042	0.124	0.066	0.227	0.167	0.037	0.119	2.552	2.712	2.652	2.522	2.604
CPI-SS03A3EE72E	FLT4_PDGFC	simple:P35916	simple:Q9NRA1	FLT4	PDGFC	TRUE	TRUE	FALSE	guidetopharmacology.org	FALSE	0.063	0.224	0.163	0.034	0.116	0.083	0.244	0.183	0.054	0.136	0.064	0.225	0.164	0.035	0.117	0.064	0.224	0.164	0.034	0.116	0.064	0.224	0.164	0.035	0.117
CPI-SS0F972435E	FLT4_VEGFC	simple:P35916	simple:P49767	FLT4	VEGFC	TRUE	TRUE	FALSE	curated	FALSE	0.009	0.124	0.028	0.01	0.07	0.029	0.144	0.048	0.029	0.089	0.01	0.125	0.029	0.011	0.07	0.01	0.124	0.029	0.01	0.07	0.01	0.125	0.029	0.01	0.07
CPI-SS0273C9AED	KDR_VEGFC	simple:P35968	simple:P49767	KDR	VEGFC	TRUE	TRUE	FALSE	curated	FALSE	0.007	0.122	0.026	0.007	0.067	0.008	0.123	0.027	0.008	0.068	0.006	0.121	0.025	0.006	0.066	0.009	0.124	0.028	0.009	0.069	0.017	0.132	0.036	0.018	0.078
CPI-SS0E0DEA7D5	PECAM1_CD38	simple:P16284	simple:P28907	PECAM1	CD38	FALSE	TRUE	TRUE	curated	FALSE	0.007	0.009	0.33	0.009	0.018	0.025	0.027	0.349	0.028	0.037	0.011	0.014	0.335	0.014	0.023	0.023	0.025	0.346	0.025	0.034	0.013	0.015	0.336	0.015	0.024
CPI-SS00F69C501	TRH_TRHR	simple:P20396	simple:P34981	TRH	TRHR	TRUE	FALSE	TRUE	I2D	FALSE	0.005	0.091	0.009	0.006	0.003	0.009	0.095	0.013	0.01	0.007	0	0	0	0	0	0	0	0	0	0	0	0	0	0	0
CPI-SS056AA08CF	EDN2_EDNRA	simple:P20800	simple:P25101	EDN2	EDNRA	TRUE	FALSE	TRUE	guidetopharmacology.org	FALSE	0	0	0	0	0	0.002	0.009	0.056	0.002	0.052	0	0	0	0	0	0	0	0	0	0	0	0	0	0	0
CPI-SS01946BE5C	C5AR1_RPS19	simple:P21730	simple:P39019	C5AR1	RPS19	FALSE	TRUE	FALSE	guidetopharmacology.org	FALSE	0.068	0.158	0.079	0.087	0.078	0.068	0.158	0.08	0.087	0.078	0	0	0	0	0	0.112	0.202	0.124	0.131	0.122	0.07	0.16	0.081	0.089	0.08
CPI-SS04456F441	TNFSF4_TNFRSF4	simple:P23510	simple:P43489	TNFSF4	TNFRSF4	FALSE	FALSE	TRUE	curated	FALSE	0.002	0.01	0.002	0.001	0	0.004	0.013	0.005	0.004	0	0.01	0.019	0.011	0.01	0	0	0	0	0	0	0	0	0	0	0
CPI-SS0C7915758	CXCR2_CXCL6	simple:P25025	simple:P80162	CXCR2	CXCL6	TRUE	TRUE	FALSE	curated	FALSE	0.001	0.005	0.001	0.001	0	0.003	0.007	0.003	0.003	0	0	0	0	0	0	0.002	0.006	0.002	0.002	0	0	0	0	0	0
CPI-SS0C321CE6D	FPR2_CAMP	simple:P25090	simple:P49913	FPR2	CAMP	TRUE	TRUE	FALSE	guidetopharmacology.org	FALSE	0.002	0.012	0.002	0.019	0.01	0.014	0.023	0.014	0.031	0.022	0.003	0.013	0.004	0.021	0.012	0.003	0.013	0.003	0.02	0.012	0	0	0	0	0
CPI-SS03EACE0E0	MST1_MST1R	simple:P26927	simple:Q04912	MST1	MST1R	TRUE	FALSE	TRUE	curated	FALSE	0.001	0.004	0	0.001	0	0.002	0.006	0	0.003	0	0	0	0	0	0	0.001	0.005	0	0.002	0	0	0	0	0	0
CPI-SS0D53B88CC	ACVR2A_INHBC	simple:P27037	simple:P55103	ACVR2A	INHBC	TRUE	TRUE	FALSE	curated	FALSE	0.071	0.081	0.073	0	0	0.512	0.522	0.514	0	0	0.155	0.165	0.157	0	0	0.146	0.156	0.148	0	0	0.185	0.195	0.187	0	0
CPI-SS099C401F7	ACVR2A_INHBE	simple:P27037	simple:P58166	ACVR2A	INHBE	TRUE	TRUE	FALSE	curated	FALSE	0.071	0.075	0	0.072	0	0.512	0.516	0	0.513	0	0.155	0.159	0	0.156	0	0.146	0.149	0	0.147	0	0.185	0.188	0	0.185	0
CPI-SS0412C803A	TNFRSF8_TNFSF8	simple:P28908	simple:P32971	TNFRSF8	TNFSF8	FALSE	TRUE	FALSE	curated	FALSE	0.001	0.002	0	0.085	0	0.01	0.01	0	0.093	0	0	0	0	0	0	0	0	0	0	0	0	0	0	0	0
CPI-SS0D0252D87	AXL_IL15RA	simple:P30530	simple:Q13261	AXL	IL15RA	TRUE	TRUE	TRUE	I2D	FALSE	0.007	0.193	0.188	0.06	0.043	0.031	0.216	0.212	0.083	0.066	0.127	0.313	0.308	0.18	0.163	0.038	0.224	0.219	0.091	0.074	0.064	0.25	0.245	0.117	0.1
CPI-SS077B160B9	IL15_IL15RA	simple:P40933	simple:Q13261	IL15	IL15RA	TRUE	FALSE	TRUE	guidetopharmacology.org	FALSE	0.006	0.192	0.187	0.059	0.042	0.009	0.195	0.191	0.062	0.045	0.084	0.27	0.265	0.137	0.12	0.14	0.326	0.321	0.193	0.176	0.023	0.208	0.204	0.075	0.058
CPI-SS03A4F7DC8	AXL_GAS6	simple:P30530	simple:Q14393	AXL	GAS6	TRUE	TRUE	FALSE	guidetopharmacology.org	FALSE	0.033	0.632	0.146	0.086	0.137	0.056	0.656	0.169	0.109	0.161	0.153	0.752	0.266	0.206	0.257	0.064	0.663	0.177	0.117	0.168	0.09	0.689	0.203	0.143	0.194
CPI-SS085195142	TYRO3_GAS6	simple:Q06418	simple:Q14393	TYRO3	GAS6	TRUE	TRUE	FALSE	guidetopharmacology.org	FALSE	0.171	0.77	0.284	0.224	0.275	0.13	0.73	0.243	0.183	0.235	0.063	0.662	0.176	0.115	0.167	0.058	0.658	0.171	0.111	0.163	0.09	0.689	0.203	0.143	0.194
CPI-SS0415CC75D	MERTK_GAS6	simple:Q12866	simple:Q14393	MERTK	GAS6	TRUE	TRUE	FALSE	guidetopharmacology.org	FALSE	0.04	0.64	0.153	0.093	0.145	0.058	0.657	0.171	0.111	0.163	1.172	1.771	1.285	1.225	1.276	1.656	2.255	1.769	1.709	1.76	0.466	1.065	0.579	0.519	0.57
CPI-SS00C069DCB	SSTR1_SST	simple:P30872	simple:P61278	SSTR1	SST	TRUE	TRUE	FALSE	I2D	FALSE	0.031	0.155	0.039	0.038	0.018	0.042	0.166	0.05	0.049	0.029	0.032	0.156	0.04	0.039	0.019	0.033	0.157	0.041	0.04	0.02	0.05	0.173	0.057	0.057	0.036
CPI-SS0B27088B4	CALCR_ADM	simple:P30988	simple:P35318	CALCR	ADM	TRUE	TRUE	FALSE	guidetopharmacology.org	FALSE	0.002	0.02	0.021	0.002	0.022	0.006	0.024	0.025	0.006	0.026	0.004	0.022	0.023	0.004	0.024	0	0	0	0	0	0	0	0	0	0
CPI-SS083319328	NTSR1_NTS	simple:P30989	simple:P30990	NTSR1	NTS	TRUE	TRUE	FALSE	guidetopharmacology.org	FALSE	0.004	0.031	0.007	0.004	0.005	0.018	0.046	0.022	0.019	0.02	0.004	0.031	0.007	0.004	0.006	0	0	0	0	0	0	0	0	0	0
CPI-SS073C1B796	CD52_SIGLEC10	simple:P31358	simple:Q96LC7	CD52	SIGLEC10	TRUE	FALSE	FALSE	curated	FALSE	0	0.004	0	0.007	0	0	0.004	0	0.007	0	0	0.002	0	0.005	0	0	0.022	0	0.025	0	0	0	0	0	0
CPI-SS0A91954A0	RYK_WNT3A	simple:P34925	simple:P56704	RYK	WNT3A	TRUE	TRUE	FALSE	I2D	FALSE	0.095	0.095	0	0.095	0	0.59	0.591	0	0.591	0	0.381	0.382	0	0.382	0	0.076	0.077	0	0.077	0	0.219	0.219	0	0.219	0
CPI-SS06CBC985C	LTBR_LTB	simple:P36941	simple:Q06643	LTBR	LTB	FALSE	TRUE	FALSE	curated	FALSE	0.001	0.002	0.002	0.009	0.006	0.003	0.003	0.003	0.01	0.007	0.01	0.01	0.011	0.017	0.015	0.021	0.021	0.021	0.028	0.025	0.022	0.022	0.023	0.029	0.027
CPI-SC00ACA947E	GDNF_RET receptor 1	simple:P39905	complex:RET receptor 1	GDNF		TRUE	FALSE	TRUE	curated	FALSE	0.01	0.177	0.034	0.013	0.007	0.015	0.182	0.039	0.018	0.012	0	0	0	0	0	0	0	0	0	0	0	0	0	0	0
CPI-SC0EB9D030F	ARTN_RET receptor 1	simple:Q5T4W7	complex:RET receptor 1	ARTN		TRUE	FALSE	TRUE	curated	FALSE	0.01	0.177	0.034	0.013	0.007	0.011	0.178	0.035	0.014	0.008	0	0	0	0	0	0	0	0	0	0	0.012	0.18	0.036	0.015	0.01
CPI-SC0273E24EB	ARTN_RET receptor 3	simple:Q5T4W7	complex:RET receptor 3	ARTN		TRUE	FALSE	TRUE	curated	FALSE	0	0.003	0	0	0	0.001	0.004	0	0	0	0	0	0	0	0	0	0	0	0	0	0.003	0.006	0	0	0
CPI-SS0DC2DD9D7	THPO_MPL	simple:P40225	simple:P40238	THPO	MPL	TRUE	FALSE	TRUE	curated	FALSE	0.003	0.008	0.005	0.002	0.004	0.045	0.049	0.046	0.044	0.045	0.004	0.009	0.006	0.003	0.005	0.008	0.012	0.009	0.006	0.008	0.007	0.011	0.008	0.006	0.007
CPI-SS04CD88411	GPR1_RARRES2	simple:P46091	simple:Q99969	GPR1	RARRES2	TRUE	TRUE	FALSE	guidetopharmacology.org	FALSE	0.001	0.003	0.004	0.002	0	0.01	0.012	0.013	0.012	0	0.001	0.003	0.004	0.003	0	0.002	0.003	0.004	0.003	0	0	0	0	0	0
CPI-SS07D56EB05	CMKLR1_RARRES2	simple:Q99788	simple:Q99969	CMKLR1	RARRES2	TRUE	TRUE	FALSE	guidetopharmacology.org	FALSE	0.001	0.003	0.004	0.002	0	0.005	0.007	0.008	0.006	0	0.023	0.024	0.025	0.024	0	0.105	0.106	0.107	0.106	0	0.008	0.01	0.011	0.009	0
CPI-SS052D34F0B	XCR1_XCL2	simple:P46094	simple:Q9UBD3	XCR1	XCL2	TRUE	TRUE	FALSE	curated	FALSE	0	0.001	0	0	0	0	0.002	0	0	0	0	0	0	0	0	0	0	0	0	0	0	0	0	0	0
CPI-SS0BDA7A63E	NPBWR1_NPW	simple:P48145	simple:Q8N729	NPBWR1	NPW	TRUE	TRUE	FALSE	guidetopharmacology.org	FALSE	0	0	0	0	0	0.001	0.002	0	0	0	0	0	0	0	0	0	0	0	0	0	0	0	0	0	0
CPI-SS0D5E1C3D2	NPBWR1_NPB	simple:P48145	simple:Q8NG41	NPBWR1	NPB	TRUE	TRUE	FALSE	guidetopharmacology.org	FALSE	0	0	0	0	0	0.01	0.006	0.006	0.009	0.004	0	0	0	0	0	0	0	0	0	0	0	0	0	0	0
CPI-SS07B3139A0	NMU_NMUR2	simple:P48645	simple:Q9GZQ4	NMU	NMUR2	TRUE	FALSE	TRUE	guidetopharmacology.org	FALSE	0.005	0.281	0.276	0.018	0.006	0.021	0.298	0.292	0.034	0.022	0.005	0.282	0.276	0.019	0.007	0.005	0.282	0.276	0.019	0.007	0.006	0.282	0.277	0.019	0.007
CPI-SS0C849D294	NMS_NMUR2	simple:Q5H8A3	simple:Q9GZQ4	NMS	NMUR2	TRUE	FALSE	TRUE	guidetopharmacology.org	FALSE	0.003	0.28	0.274	0.017	0.005	0.005	0.282	0.276	0.019	0.007	0	0	0	0	0	0	0	0	0	0	0	0	0	0	0
CPI-SS018BD4882	NMU_NMUR1	simple:P48645	simple:Q9HB89	NMU	NMUR1	TRUE	FALSE	TRUE	guidetopharmacology.org	FALSE	0.002	0.007	0.002	0	0	0.018	0.024	0.018	0	0	0.002	0.008	0.003	0	0	0.002	0.008	0.003	0	0	0.003	0.009	0.003	0	0
CPI-SS0148BDF1C	NMS_NMUR1	simple:Q5H8A3	simple:Q9HB89	NMS	NMUR1	TRUE	FALSE	TRUE	guidetopharmacology.org	FALSE	0	0.006	0.001	0	0	0.002	0.008	0.003	0	0	0	0	0	0	0	0	0	0	0	0	0	0	0	0	0
CPI-SS032E9A219	CX3CR1_CX3CL1	simple:P49238	simple:P78423	CX3CR1	CX3CL1	TRUE	TRUE	TRUE	curated	FALSE	0.048	0.367	0.08	0.048	0.068	0.143	0.461	0.175	0.142	0.163	0.076	0.395	0.108	0.076	0.096	1.249	1.568	1.281	1.249	1.269	0.065	0.383	0.096	0.064	0.085
CPI-SS0EF1A7415	CCR4_CCL17	simple:P51679	simple:Q92583	CCR4	CCL17	TRUE	TRUE	FALSE	curated	FALSE	0.001	0.004	0.002	0	0	0.004	0.008	0.005	0	0	0.001	0.005	0.002	0	0	0.001	0.005	0.002	0	0	0	0	0	0	0
CPI-SS0974EB232	ACKR1_CCL17	simple:Q16570	simple:Q92583	ACKR1	CCL17	TRUE	TRUE	FALSE	I2D	FALSE	0.005	0.008	0.006	0	0	0.136	0.139	0.137	0	0	0.01	0.014	0.011	0	0	0.006	0.01	0.007	0	0	0.008	0.011	0.009	0	0
CPI-SS04BE14432	INHBC_ACVR2B	simple:P55103	simple:Q13705	INHBC	ACVR2B	TRUE	FALSE	TRUE	curated	FALSE	0.039	0.088	0.028	0.047	0.061	0.048	0.098	0.038	0.057	0.071	0.041	0.09	0.03	0.049	0.063	0	0	0	0	0	0	0	0	0	0
CPI-SS09CCC0451	INHBE_ACVR2B	simple:P58166	simple:Q13705	INHBE	ACVR2B	TRUE	FALSE	TRUE	curated	FALSE	0.039	0.088	0.028	0.047	0.061	0.042	0.092	0.031	0.051	0.065	0	0	0	0	0	0.039	0.089	0.028	0.048	0.062	0	0	0	0	0
CPI-SS0BC884A75	QRFP_QRFPR	simple:P83859	simple:Q96P65	QRFP	QRFPR	TRUE	FALSE	TRUE	guidetopharmacology.org	FALSE	0.001	0.025	0.002	0	0	0.003	0.026	0.003	0	0	0.003	0.027	0.004	0	0	0.002	0.025	0.002	0	0	0	0	0	0	0
CPI-CS0C57A3081	PlexinA1_complex1_SEMA6D	complex:PlexinA1_complex1	simple:Q8NFY4		SEMA6D	FALSE	TRUE	FALSE	curated	FALSE	0.993	1.804	1.577	0.211	1.225	0.994	1.805	1.578	0.212	1.226	0.992	1.803	1.575	0.209	1.224	0.995	1.806	1.578	0.212	1.227	1.003	1.814	1.587	0.221	1.235
CPI-CS0123BC66C	PlexinA1_complex2_SEMA6D	complex:PlexinA1_complex2	simple:Q8NFY4		SEMA6D	FALSE	TRUE	FALSE	curated	FALSE	0.994	1.804	1.577	0.211	1.226	0.996	1.807	1.58	0.214	1.228	0.993	1.804	1.577	0.211	1.225	1.01	1.82	1.593	0.227	1.242	0.996	1.807	1.58	0.214	1.228
CPI-SS0B337B316	TEK_ANGPT1	simple:Q02763	simple:Q15389	TEK	ANGPT1	TRUE	TRUE	FALSE	curated	FALSE	0.042	0.273	0.427	0.018	0.491	0.265	0.496	0.65	0.241	0.714	0.057	0.288	0.441	0.033	0.506	0.051	0.281	0.435	0.026	0.499	0.049	0.279	0.433	0.024	0.498
CPI-SS00BBA318F	TEK_ANGPT4	simple:Q02763	simple:Q9Y264	TEK	ANGPT4	TRUE	TRUE	FALSE	curated	FALSE	0.006	0.012	0.006	0.008	0.008	0.229	0.235	0.229	0.23	0.231	0.021	0.027	0.021	0.022	0.023	0.014	0.02	0.015	0.016	0.016	0.013	0.018	0.013	0.014	0.015
CPI-SS09D5B5F9C	LRP1_ERFE	simple:Q07954	simple:Q4G0M1	LRP1	ERFE	TRUE	TRUE	FALSE	InnateDB-All	FALSE	0.023	0.023	0	0	0	0.6	0.601	0	0	0	0.899	0.9	0	0	0	0.404	0.404	0	0	0	1.059	1.059	0	0	0
CPI-SS0E9015902	CD47_SIRPG	simple:Q08722	simple:Q9P1W8	CD47	SIRPG	FALSE	TRUE	FALSE	curated	FALSE	0	0.178	0	0	0	0	0.705	0	0	0	0	0.181	0	0	0	0	0.183	0	0	0	0	0.263	0	0	0
CPI-SS02EDE5894	CRHR2_UCN3	simple:Q13324	simple:Q969E3	CRHR2	UCN3	TRUE	TRUE	FALSE	guidetopharmacology.org	FALSE	0	0	0	0	0	0	0.002	0	0	0	0	0	0	0	0	0	0	0	0	0	0	0	0	0	0
CPI-SS083E7D88C	CRHR2_UCN2	simple:Q13324	simple:Q96RP3	CRHR2	UCN2	TRUE	TRUE	FALSE	guidetopharmacology.org	FALSE	0	0	0	0	0	0	0.002	0.002	0	0	0	0	0	0	0	0	0	0	0	0	0	0	0	0	0
CPI-SS0D00AAD2F	SEMA5A_PLXNB3	simple:Q13591	simple:Q9ULL4	SEMA5A	PLXNB3	FALSE	FALSE	TRUE	curated	FALSE	0.392	0.161	0.172	0.161	0.241	0.907	0.676	0.687	0.676	0.756	0.357	0.126	0.137	0.126	0.207	0.34	0.11	0.12	0.109	0.19	2.056	1.825	1.836	1.825	1.905
CPI-SS0893BD6B6	IL16_GRIN2C	simple:Q14005	simple:Q14957	IL16	GRIN2C	TRUE	FALSE	TRUE	I2D	FALSE	0.003	0.035	0.276	0.003	0.004	0.025	0.056	0.297	0.024	0.026	0.008	0.04	0.281	0.007	0.009	0.039	0.07	0.311	0.038	0.04	0.004	0.036	0.277	0.003	0.005
CPI-SS0F856A80F	KISS1_KISS1R	simple:Q15726	simple:Q969F8	KISS1	KISS1R	TRUE	FALSE	TRUE	guidetopharmacology.org	FALSE	0.002	0.028	0.002	0.005	0.003	0.003	0.029	0.003	0.005	0.003	0	0	0	0	0	0	0	0	0	0	0	0	0	0	0
CPI-SS07DFEBFA8	GPR19_ENHO	simple:Q15760	simple:Q6UWT2	GPR19	ENHO	TRUE	TRUE	FALSE	guidetopharmacology.org	FALSE	0.037	0.079	0.116	0.034	0.054	0.112	0.153	0.19	0.108	0.129	0.088	0.129	0.166	0.084	0.105	0.027	0.069	0.105	0.023	0.044	0.073	0.115	0.151	0.069	0.09
CPI-SS08C995EB4	CXCL17_GPR35	simple:Q6UXB2	simple:Q9HC97	CXCL17	GPR35	TRUE	FALSE	TRUE	guidetopharmacology.org	FALSE	0.043	0.056	0.056	0.043	0.042	0.13	0.143	0.143	0.13	0.129	0.027	0.04	0.039	0.027	0.026	0.025	0.038	0.038	0.025	0.024	0.02	0.033	0.033	0.02	0.019
CPI-SS0BA87E94E	GFRAL_GDF15	simple:Q6UXV0	simple:Q99988	GFRAL	GDF15	TRUE	TRUE	FALSE	guidetopharmacology.org	FALSE	0	0.001	0.002	0	0	0	0.004	0.005	0	0	0	0.004	0.004	0	0	0	0.002	0.002	0	0	0	0.003	0.004	0	0
CPI-SS027E57635	PROKR2_PROK2	simple:Q8NFJ6	simple:Q9HC23	PROKR2	PROK2	TRUE	TRUE	FALSE	guidetopharmacology.org	FALSE	0	0.001	0	0	0	0.002	0.003	0	0	0	0.002	0.003	0	0	0	0	0	0	0	0	0	0	0	0	0
CPI-SS01442BDB7	RXFP2_RLN3	simple:Q8WXD0	simple:Q8WXF3	RXFP2	RLN3	TRUE	TRUE	FALSE	guidetopharmacology.org	FALSE	0.001	0.001	0	0	0	0.017	0.018	0	0	0	0.002	0.002	0	0	0	0	0	0	0	0	0	0	0	0	0
CPI-SS09EF54490	ADGRV1_GPHA2	simple:Q8WXG9	simple:Q96T91	ADGRV1	GPHA2	TRUE	TRUE	FALSE	InnateDB-All	FALSE	0.086	0.086	0.087	0	0	0.254	0.254	0.255	0	0	0.066	0.067	0.068	0	0	0.015	0.016	0.016	0	0	0.141	0.141	0.142	0	0
CPI-SS00797FD15	EDA_EDA2R	simple:Q92838	simple:Q9HAV5	EDA	EDA2R	TRUE	FALSE	TRUE	guidetopharmacology.org	FALSE	0.032	0.024	0.024	0.024	0.04	0.322	0.314	0.314	0.314	0.33	0.16	0.152	0.152	0.152	0.168	0.042	0.033	0.034	0.033	0.049	0.084	0.076	0.077	0.076	0.092
CPI-SS05A8552D7	EDA_EDAR	simple:Q92838	simple:Q9UNE0	EDA	EDAR	TRUE	FALSE	TRUE	guidetopharmacology.org	FALSE	0.023	0.025	0	0	0.025	0.313	0.314	0	0	0.315	0.151	0.152	0	0	0.153	0.033	0.034	0	0	0.035	0.075	0.077	0	0	0.078
CPI-SC090068F7B	TSLP_TSLPR	simple:Q969D9	complex:TSLPR	TSLP		TRUE	FALSE	TRUE	curated	FALSE	0	0	0	0	0	0.001	0.002	0.002	0.021	0.003	0.001	0.002	0.002	0.022	0.003	0.004	0.005	0.005	0.025	0.006	0	0	0	0	0
CPI-SC047CEF2DD	CRLF2_TSLPR	simple:Q9HC73	complex:TSLPR	CRLF2		TRUE	TRUE	TRUE	curated	FALSE	0.005	0.006	0.006	0.026	0.007	0.067	0.068	0.068	0.088	0.069	0.02	0.02	0.02	0.04	0.021	0.022	0.023	0.023	0.043	0.024	0.025	0.026	0.026	0.046	0.027
CPI-SS04C672963	ESAM_ESAM	simple:Q96AP7	simple:Q96AP7	ESAM	ESAM	FALSE	FALSE	FALSE	curated	FALSE	0.001	0.01	0.003	0	0	0.01	0.019	0.013	0	0	0.003	0.013	0.006	0	0	0	0	0	0	0	0	0	0	0	0
CPI-SS08C78576B	GPHA2_EPHA6	simple:Q96T91	simple:Q9UF33	GPHA2	EPHA6	TRUE	FALSE	TRUE	InnateDB-All	FALSE	0.126	5.22	0.403	0.308	0.294	0.127	5.221	0.404	0.309	0.294	0.127	5.221	0.405	0.309	0.295	0	0	0	0	0	0	0	0	0	0
CPI-SC001AFA16D	NRTN_RET receptor 2	simple:Q99748	complex:RET receptor 2	NRTN		TRUE	FALSE	TRUE	curated	FALSE	0.009	0.15	0.017	0.016	0.011	0.015	0.157	0.024	0.023	0.017	0.009	0.15	0.018	0.017	0.011	0.006	0.148	0.015	0.014	0.008	0	0	0	0	0

## Sheet: WT.pvalues
id_cp_interaction	interacting_pair	partner_a	partner_b	gene_a	gene_b	secreted	receptor_a	receptor_b	annotation_strategy	is_integrin	OL.OL	OL.N	OL.A	OL.M	OL.OP	N.OL	N.N	N.A	N.M	N.OP	A.OL	A.N	A.A	A.M	A.OP	M.OL	M.N	M.A	M.M	M.OP	OP.OL	OP.N	OP.A	OP.M	OP.OP
CPI-SS0A7B487D4	KLRG2_WNT11	simple:A4D1S0	simple:O96014	KLRG2	WNT11	TRUE	TRUE	FALSE	InnateDB-All	FALSE	1	1	1	1	1	1	1	1	1	1	1	1	1	1	1	1	1	1	1	1	1	1	1	1	1
CPI-SS0FEC87269	KLRG2_TNFSF9	simple:A4D1S0	simple:P41273	KLRG2	TNFSF9	TRUE	TRUE	FALSE	InnateDB-All	FALSE	1	1	1	1	1	1	1	1	1	1	1	1	1	1	1	1	1	1	1	1	1	1	1	1	1
CPI-SS00A8596B5	PVR_TNFSF9	simple:P15151	simple:P41273	PVR	TNFSF9	TRUE	TRUE	FALSE	InnateDB-All	FALSE	1	1	1	1	1	1	1	1	1	1	1	1	1	1	1	1	1	1	1	1	1	1	1	1	1
CPI-SS044DF8749	KLRG2_WNT5B	simple:A4D1S0	simple:Q9H1J7	KLRG2	WNT5B	TRUE	TRUE	FALSE	InnateDB-All	FALSE	1	1	1	1	1	1	1	1	1	1	1	1	1	1	1	1	1	1	1	1	1	1	1	1	1
CPI-SS0F8ABC300	GALR2_GAL	simple:O43603	simple:P22466	GALR2	GAL	TRUE	TRUE	FALSE	guidetopharmacology.org	FALSE	1	1	1	1	1	1	1	1	1	1	1	1	1	1	1	1	1	1	1	1	1	1	1	1	1
CPI-SS0E70DD97F	GALR3_GAL	simple:O60755	simple:P22466	GALR3	GAL	TRUE	TRUE	FALSE	guidetopharmacology.org	FALSE	1	1	1	1	1	1	1	1	1	1	1	1	1	1	1	1	1	1	1	1	1	1	1	1	1
CPI-SS0B84DAE3D	PVR_CD96	simple:P15151	simple:P40200	PVR	CD96	TRUE	TRUE	TRUE	curated	FALSE	1	1	1	1	1	1	1	1	1	1	1	1	1	1	1	1	1	1	1	1	1	1	1	1	1
CPI-SS0A8627ED6	PVR_CD226	simple:P15151	simple:Q15762	PVR	CD226	TRUE	TRUE	TRUE	curated	FALSE	1	1	1	1	1	1	1	1	1	1	1	1	1	1	1	1	1	1	1	1	1	1	1	1	1
CPI-SS00561BBD7	PVR_TIGIT	simple:P15151	simple:Q495A1	PVR	TIGIT	TRUE	TRUE	FALSE	curated	FALSE	1	1	1	1	1	1	1	1	1	1	1	1	1	1	1	1	1	1	1	1	1	1	1	1	1
CPI-SS0F1A060D4	PVR_NECTIN3	simple:P15151	simple:Q9NQS3	PVR	NECTIN3	TRUE	TRUE	FALSE	curated	FALSE	1	1	1	1	1	1	1	1	1	1	1	1	1	1	1	1	1	1	1	1	1	1	1	1	1
CPI-SS00550260E	CADM3_NECTIN3	simple:Q8N126	simple:Q9NQS3	CADM3	NECTIN3	FALSE	FALSE	FALSE	curated	FALSE	1	1	1	1	1	1	0	0	1	0	1	1	1	1	1	1	1	1	1	1	1	1	1	1	1
CPI-SS0B990492C	CADM1_NECTIN3	simple:Q9BY67	simple:Q9NQS3	CADM1	NECTIN3	FALSE	FALSE	FALSE	curated	FALSE	1	1	1	1	1	1	0	0	1	0	1	1	1	1	1	1	1	1	1	1	1	1	1	1	0
CPI-SS0C5E9FBFB	NECTIN1_NECTIN3	simple:Q15223	simple:Q9NQS3	NECTIN1	NECTIN3	TRUE	TRUE	FALSE	curated	FALSE	1	0	0	1	0	1	0	0	1	0	1	1	1	1	1	1	1	1	1	1	1	0	0	1	0
CPI-SS03859E16F	TIGIT_NECTIN3	simple:Q495A1	simple:Q9NQS3	TIGIT	NECTIN3	FALSE	FALSE	FALSE	curated	FALSE	1	1	1	1	1	1	1	1	1	1	1	1	1	1	1	1	1	1	1	1	1	1	1	1	1
CPI-SS02FBD007E	NECTIN2_NECTIN3	simple:Q92692	simple:Q9NQS3	NECTIN2	NECTIN3	FALSE	TRUE	FALSE	curated	FALSE	1	1	1	1	1	1	1	1	1	1	1	1	1	1	1	1	1	1	1	1	1	1	1	1	1
CPI-SS0D03910A0	GALR2_GALP	simple:O43603	simple:Q9UBC7	GALR2	GALP	TRUE	TRUE	FALSE	guidetopharmacology.org	FALSE	1	1	1	1	1	1	1	1	1	1	1	1	1	1	1	1	1	1	1	1	1	1	1	1	1
CPI-SS0FEAC3352	GALR3_GALP	simple:O60755	simple:Q9UBC7	GALR3	GALP	TRUE	TRUE	FALSE	guidetopharmacology.org	FALSE	1	1	1	1	1	1	1	1	1	1	1	1	1	1	1	1	1	1	1	1	1	1	1	1	1
CPI-SS0B0E74BC0	GALR1_GALP	simple:P47211	simple:Q9UBC7	GALR1	GALP	TRUE	TRUE	FALSE	guidetopharmacology.org	FALSE	1	1	1	1	1	1	1	1	1	1	1	1	1	1	1	1	1	1	1	1	1	1	1	1	1
CPI-SS09C06644C	CADM3_CADM1	simple:Q8N126	simple:Q9BY67	CADM3	CADM1	FALSE	FALSE	FALSE	curated	FALSE	1	1	1	1	1	1	0	1	1	0	1	1	1	1	1	1	1	1	1	1	1	0	1	1	1
CPI-SS0889E281D	CADM1_CADM1	simple:Q9BY67	simple:Q9BY67	CADM1	CADM1	FALSE	FALSE	FALSE	curated	FALSE	1	0	1	1	1	0	0	0	0	0	1	0	1	1	1	1	0	1	1	1	1	0	1	1	1
CPI-SS0C9696AAA	CRTAM_CADM1	simple:O95727	simple:Q9BY67	CRTAM	CADM1	FALSE	FALSE	FALSE	curated	FALSE	1	1	1	1	1	1	1	1	1	1	1	1	1	1	1	1	1	1	1	1	1	1	1	1	1
CPI-SS02D18D12B	CADM3_CADM4	simple:Q8N126	simple:Q8NFZ8	CADM3	CADM4	FALSE	FALSE	FALSE	curated	FALSE	1	1	1	1	1	0	0	0	1	0	1	1	1	1	1	1	1	1	1	1	1	1	1	1	1
CPI-SS0B3829651	CADM3_EPB41L1	simple:Q8N126	simple:Q9H4G0	CADM3	EPB41L1	FALSE	FALSE	FALSE	curated	FALSE	1	1	1	1	1	1	0	1	1	1	1	1	1	1	1	1	1	1	1	1	1	0	1	1	1
CPI-SS00661A3A4	NECTIN1_CADM3	simple:Q15223	simple:Q8N126	NECTIN1	CADM3	TRUE	TRUE	FALSE	curated	FALSE	1	0	1	1	1	1	0	1	1	1	1	1	1	1	1	1	1	1	1	1	1	0	1	1	1
CPI-SS01E0F2D2C	NECTIN1_NECTIN4	simple:Q15223	simple:Q96NY8	NECTIN1	NECTIN4	TRUE	TRUE	TRUE	curated	FALSE	1	1	1	1	1	1	1	1	1	1	1	1	1	1	1	1	1	1	1	1	1	1	1	1	1
CPI-SS0A5DF05C0	TIGIT_NECTIN2	simple:Q495A1	simple:Q92692	TIGIT	NECTIN2	FALSE	FALSE	TRUE	curated	FALSE	1	1	1	1	1	1	1	1	1	1	1	1	1	1	1	1	1	1	1	1	1	1	1	1	1
CPI-SS06207F70E	CD226_NECTIN2	simple:Q15762	simple:Q92692	CD226	NECTIN2	FALSE	TRUE	TRUE	curated	FALSE	1	1	1	1	1	1	1	1	1	1	1	1	1	1	1	1	1	1	1	1	1	1	1	1	1
CPI-SC01C699B73	COL6A6_a10b1 complex	simple:A6NMZ7	complex:a10b1 complex	COL6A6		TRUE	FALSE	FALSE	curated	TRUE	1	1	1	1	1	1	1	1	1	1	1	1	1	1	1	1	1	1	1	1	1	1	1	1	1
CPI-SC00A0B0892	COL6A5_a10b1 complex	simple:A8TX70	complex:a10b1 complex	COL6A5		TRUE	FALSE	FALSE	curated	TRUE	1	1	1	1	1	1	1	1	1	1	1	1	1	1	1	1	1	1	1	1	1	1	1	1	1
CPI-SC07ECBFCA7	COL1A1_a10b1 complex	simple:P02452	complex:a10b1 complex	COL1A1		TRUE	FALSE	FALSE	curated	TRUE	1	1	1	1	1	1	1	1	1	1	1	1	1	1	1	1	1	1	1	1	1	1	1	1	1
CPI-SC0DA298BEC	COL2A1_a10b1 complex	simple:P02458	complex:a10b1 complex	COL2A1		TRUE	FALSE	FALSE	curated	TRUE	1	1	1	1	1	1	1	1	1	1	1	1	1	1	1	1	1	1	1	1	1	1	1	1	1
CPI-SC067433F6B	COL3A1_a10b1 complex	simple:P02461	complex:a10b1 complex	COL3A1		TRUE	FALSE	FALSE	curated	TRUE	1	1	1	1	1	1	1	1	1	1	1	1	1	1	1	1	1	1	1	1	1	1	1	1	1
CPI-SC0B6F1A278	COL4A1_a10b1 complex	simple:P02462	complex:a10b1 complex	COL4A1		TRUE	FALSE	FALSE	curated	TRUE	1	1	1	1	1	1	0	1	1	1	1	1	1	1	1	1	1	1	1	1	1	1	1	1	1
CPI-SC0D19BAF15	FN1_a10b1 complex	simple:P02751	complex:a10b1 complex	FN1		TRUE	FALSE	FALSE	curated	TRUE	1	1	1	1	1	1	1	1	1	1	1	1	1	1	1	1	1	1	1	1	1	1	1	1	1
CPI-SC0F516B854	COL5A2_a10b1 complex	simple:P05997	complex:a10b1 complex	COL5A2		TRUE	FALSE	FALSE	curated	TRUE	1	1	1	1	1	1	1	1	1	1	1	1	1	1	1	1	1	1	1	1	1	1	1	1	1
CPI-SC011F01833	COL1A2_a10b1 complex	simple:P08123	complex:a10b1 complex	COL1A2		TRUE	FALSE	FALSE	curated	TRUE	1	1	1	1	1	1	1	1	1	1	1	1	1	1	1	1	1	1	1	1	1	1	1	1	1
CPI-SC0FA79E269	COL4A2_a10b1 complex	simple:P08572	complex:a10b1 complex	COL4A2		TRUE	FALSE	FALSE	curated	TRUE	1	1	1	1	1	1	0	1	1	1	1	1	1	1	1	1	1	1	1	1	1	1	1	1	1
CPI-SC04936738A	COL11A1_a10b1 complex	simple:P12107	complex:a10b1 complex	COL11A1		TRUE	FALSE	FALSE	curated	TRUE	1	1	1	1	1	1	0	1	1	1	1	1	1	1	1	1	1	1	1	1	1	1	1	1	1
CPI-SC02B111AB0	COL6A1_a10b1 complex	simple:P12109	complex:a10b1 complex	COL6A1		TRUE	FALSE	FALSE	curated	TRUE	1	1	1	1	1	1	1	1	1	1	1	1	1	1	1	1	1	1	1	1	1	1	1	1	1
CPI-SC0CE851065	COL6A2_a10b1 complex	simple:P12110	complex:a10b1 complex	COL6A2		TRUE	FALSE	FALSE	curated	TRUE	1	1	1	1	1	1	1	1	1	1	1	1	1	1	1	1	1	1	1	1	1	1	1	1	1
CPI-SC07375C073	COL6A3_a10b1 complex	simple:P12111	complex:a10b1 complex	COL6A3		TRUE	FALSE	FALSE	curated	TRUE	1	1	1	1	1	1	1	1	1	1	1	1	1	1	1	1	1	1	1	1	1	1	1	1	1
CPI-SC0D6C777F2	COL11A2_a10b1 complex	simple:P13942	complex:a10b1 complex	COL11A2		TRUE	FALSE	FALSE	curated	TRUE	1	1	1	1	1	1	1	1	1	1	1	1	1	1	1	1	1	1	1	1	1	0	1	1	1
CPI-SC0F74C069F	COL9A1_a10b1 complex	simple:P20849	complex:a10b1 complex	COL9A1		TRUE	FALSE	FALSE	curated	TRUE	1	1	1	1	1	1	1	1	1	1	1	1	1	1	1	1	1	1	1	1	1	0	1	1	1
CPI-SC041DEF0FB	COL5A1_a10b1 complex	simple:P20908	complex:a10b1 complex	COL5A1		TRUE	FALSE	FALSE	curated	TRUE	1	1	1	1	1	1	1	1	1	1	1	1	1	1	1	1	1	1	1	1	1	1	1	1	1
CPI-SC0C907A888	COL8A2_a10b1 complex	simple:P25067	complex:a10b1 complex	COL8A2		TRUE	FALSE	FALSE	curated	TRUE	1	1	1	1	1	1	1	1	1	1	1	1	1	1	1	1	1	1	1	1	1	1	1	1	1
CPI-SC08B1D5269	COL5A3_a10b1 complex	simple:P25940	complex:a10b1 complex	COL5A3		TRUE	FALSE	FALSE	curated	TRUE	1	1	1	1	1	1	1	1	1	1	1	0	1	1	1	1	1	1	1	1	1	0	1	1	1
CPI-SC0F8101D41	COL8A1_a10b1 complex	simple:P27658	complex:a10b1 complex	COL8A1		TRUE	FALSE	FALSE	curated	TRUE	1	1	1	1	1	1	1	1	1	1	1	1	1	1	1	1	1	1	1	1	1	1	1	1	1
CPI-SC087556B01	COL4A5_a10b1 complex	simple:P29400	complex:a10b1 complex	COL4A5		TRUE	FALSE	FALSE	curated	TRUE	1	1	1	1	1	1	0	1	1	1	1	0	1	1	1	1	1	1	1	1	1	1	1	1	1
CPI-SC08E75294D	COL15A1_a10b1 complex	simple:P39059	complex:a10b1 complex	COL15A1		TRUE	FALSE	FALSE	curated	TRUE	1	1	1	1	1	1	1	1	1	1	1	1	1	1	1	1	1	1	1	1	1	1	1	1	1
CPI-SC0017F527E	COL18A1_a10b1 complex	simple:P39060	complex:a10b1 complex	COL18A1		TRUE	FALSE	FALSE	curated	TRUE	1	1	1	1	1	1	1	1	1	1	1	1	1	1	1	1	1	1	1	1	1	0	1	1	1
CPI-SC00C0800EB	COL4A4_a10b1 complex	simple:P53420	complex:a10b1 complex	COL4A4		TRUE	FALSE	FALSE	curated	TRUE	1	1	1	1	1	1	1	1	1	1	1	1	1	1	1	1	1	1	1	1	1	1	1	1	1
CPI-SC0A3F146C2	COL4A3_a10b1 complex	simple:Q01955	complex:a10b1 complex	COL4A3		TRUE	FALSE	FALSE	curated	TRUE	1	1	1	1	1	1	1	1	1	1	1	1	1	1	1	1	1	1	1	1	1	1	1	1	1
CPI-SC015980AEB	COL14A1_a10b1 complex	simple:Q05707	complex:a10b1 complex	COL14A1		TRUE	FALSE	FALSE	curated	TRUE	1	1	1	1	1	1	1	1	1	1	1	1	1	1	1	1	1	1	1	1	1	1	1	1	1
CPI-SC0F94B2CF9	COL16A1_a10b1 complex	simple:Q07092	complex:a10b1 complex	COL16A1		TRUE	FALSE	FALSE	curated	TRUE	1	1	1	1	1	1	0	1	1	1	1	0	1	1	1	1	1	1	1	1	1	1	1	1	1
CPI-SC05565E8CE	COL4A6_a10b1 complex	simple:Q14031	complex:a10b1 complex	COL4A6		TRUE	FALSE	FALSE	curated	TRUE	1	1	1	1	1	1	1	1	1	1	1	1	1	1	1	1	1	1	1	1	1	1	1	1	1
CPI-SC067EE23E1	COL9A2_a10b1 complex	simple:Q14055	complex:a10b1 complex	COL9A2		TRUE	FALSE	FALSE	curated	TRUE	1	1	1	1	1	1	1	1	1	1	1	1	1	1	1	1	1	1	1	1	1	1	1	1	1
CPI-SC09DFB2ACA	COL19A1_a10b1 complex	simple:Q14993	complex:a10b1 complex	COL19A1		TRUE	FALSE	FALSE	curated	TRUE	1	1	1	1	1	1	0	1	1	1	1	1	1	1	1	1	1	1	1	1	1	1	1	1	1
CPI-SC05D8C0EF5	COL28A1_a10b1 complex	simple:Q2UY09	complex:a10b1 complex	COL28A1		TRUE	FALSE	FALSE	curated	TRUE	1	1	1	1	1	1	1	1	1	1	1	1	1	1	1	1	1	1	1	1	1	1	1	1	1
CPI-SC0725E3A76	COL13A1_a10b1 complex	simple:Q5TAT6	complex:a10b1 complex	COL13A1		FALSE	FALSE	FALSE	curated	TRUE	1	1	1	1	1	1	1	1	1	1	1	1	1	1	1	1	1	1	1	1	1	1	1	1	1
CPI-SC0C9CBDD21	COL27A1_a10b1 complex	simple:Q8IZC6	complex:a10b1 complex	COL27A1		TRUE	FALSE	FALSE	curated	TRUE	1	1	1	1	1	1	1	1	1	1	1	1	1	1	1	1	0	1	1	1	1	0	1	1	1
CPI-SC0147A8A42	COL26A1_a10b1 complex	simple:Q96A83	complex:a10b1 complex	COL26A1		TRUE	FALSE	FALSE	curated	TRUE	1	1	1	1	1	1	0	1	1	1	1	1	1	1	1	1	1	1	1	1	1	1	1	1	1
CPI-SC02131C05A	COL12A1_a10b1 complex	simple:Q99715	complex:a10b1 complex	COL12A1		TRUE	FALSE	FALSE	curated	TRUE	1	1	1	1	1	1	1	1	1	1	1	1	1	1	1	1	1	1	1	1	1	1	1	1	1
CPI-SC0BF16A11C	COL20A1_a10b1 complex	simple:Q9P218	complex:a10b1 complex	COL20A1		TRUE	FALSE	FALSE	curated	TRUE	1	1	1	1	1	1	1	1	1	1	1	1	1	1	1	1	1	1	1	1	1	1	1	1	1
CPI-SC06B4C6DD5	COL17A1_a10b1 complex	simple:Q9UMD9	complex:a10b1 complex	COL17A1		TRUE	FALSE	FALSE	curated	TRUE	1	1	1	1	1	1	1	1	1	1	1	1	1	1	1	1	1	1	1	1	1	1	1	1	1
CPI-SC07E0348EF	COL6A6_a11b1 complex	simple:A6NMZ7	complex:a11b1 complex	COL6A6		TRUE	FALSE	FALSE	curated	TRUE	1	1	1	1	1	1	1	1	1	1	1	1	1	1	1	1	1	1	1	1	1	1	1	1	1
CPI-SC05CE52A12	COL6A5_a11b1 complex	simple:A8TX70	complex:a11b1 complex	COL6A5		TRUE	FALSE	FALSE	curated	TRUE	1	1	1	1	1	1	1	1	1	1	1	1	1	1	1	1	1	1	1	1	1	1	1	1	1
CPI-SC0F7E26271	COL1A1_a11b1 complex	simple:P02452	complex:a11b1 complex	COL1A1		TRUE	FALSE	FALSE	curated	TRUE	1	1	1	1	1	1	1	1	1	1	1	1	1	1	1	1	1	1	1	1	1	1	1	1	1
CPI-SC0CF621D48	COL2A1_a11b1 complex	simple:P02458	complex:a11b1 complex	COL2A1		TRUE	FALSE	FALSE	curated	TRUE	1	1	1	1	1	1	1	1	1	1	1	1	1	1	1	1	1	1	1	1	1	1	1	1	1
CPI-SC0A8902C85	COL3A1_a11b1 complex	simple:P02461	complex:a11b1 complex	COL3A1		TRUE	FALSE	FALSE	curated	TRUE	1	1	1	1	1	1	1	1	1	1	1	1	1	1	1	1	1	1	1	1	1	1	1	1	1
CPI-SC0A0532ADC	COL4A1_a11b1 complex	simple:P02462	complex:a11b1 complex	COL4A1		TRUE	FALSE	FALSE	curated	TRUE	1	1	1	1	1	1	1	1	1	1	1	1	1	1	1	1	1	1	1	1	1	1	1	1	1
CPI-SC0CFF5E19D	FN1_a11b1 complex	simple:P02751	complex:a11b1 complex	FN1		TRUE	FALSE	FALSE	curated	TRUE	1	1	1	1	1	1	1	1	1	1	1	1	1	1	1	1	1	1	1	1	1	1	1	1	1
CPI-SC0DF641DAA	COL5A2_a11b1 complex	simple:P05997	complex:a11b1 complex	COL5A2		TRUE	FALSE	FALSE	curated	TRUE	1	1	1	1	1	1	1	1	1	1	1	1	1	1	1	1	1	1	1	1	1	1	1	1	1
CPI-SC0681D30FE	COL1A2_a11b1 complex	simple:P08123	complex:a11b1 complex	COL1A2		TRUE	FALSE	FALSE	curated	TRUE	1	1	1	1	1	1	1	1	1	1	1	1	1	1	1	1	1	1	1	1	1	1	1	1	1
CPI-SC02017BE74	COL4A2_a11b1 complex	simple:P08572	complex:a11b1 complex	COL4A2		TRUE	FALSE	FALSE	curated	TRUE	1	1	1	1	1	1	1	1	1	1	1	1	1	1	1	1	1	1	1	1	1	1	1	1	1
CPI-SC0861656EC	COL11A1_a11b1 complex	simple:P12107	complex:a11b1 complex	COL11A1		TRUE	FALSE	FALSE	curated	TRUE	1	1	1	1	1	1	1	1	1	1	1	1	1	1	1	1	1	1	1	1	1	1	1	1	1
CPI-SC04085F9F9	COL6A1_a11b1 complex	simple:P12109	complex:a11b1 complex	COL6A1		TRUE	FALSE	FALSE	curated	TRUE	1	1	1	1	1	1	1	1	1	1	1	1	1	1	1	1	1	1	1	1	1	1	1	1	1
CPI-SC0A54B5323	COL6A2_a11b1 complex	simple:P12110	complex:a11b1 complex	COL6A2		TRUE	FALSE	FALSE	curated	TRUE	1	1	1	1	1	1	1	1	1	1	1	1	1	1	1	1	1	1	1	1	1	1	1	1	1
CPI-SC0ECFACED2	COL6A3_a11b1 complex	simple:P12111	complex:a11b1 complex	COL6A3		TRUE	FALSE	FALSE	curated	TRUE	1	1	1	1	1	1	1	1	1	1	1	1	1	1	1	1	1	1	1	1	1	1	1	1	1
CPI-SC0CA323AE3	COL11A2_a11b1 complex	simple:P13942	complex:a11b1 complex	COL11A2		TRUE	FALSE	FALSE	curated	TRUE	1	1	1	1	1	1	1	1	1	1	1	1	1	1	1	1	1	1	1	1	1	1	1	1	1
CPI-SC0CBC30AB7	COL9A1_a11b1 complex	simple:P20849	complex:a11b1 complex	COL9A1		TRUE	FALSE	FALSE	curated	TRUE	1	1	1	1	1	1	1	1	1	1	1	1	1	1	1	1	1	1	1	1	1	1	1	1	1
CPI-SC0092846B0	COL5A1_a11b1 complex	simple:P20908	complex:a11b1 complex	COL5A1		TRUE	FALSE	FALSE	curated	TRUE	1	1	1	1	1	1	1	1	1	1	1	1	1	1	1	1	1	1	1	1	1	1	1	1	1
CPI-SC08AF9CA91	COL8A2_a11b1 complex	simple:P25067	complex:a11b1 complex	COL8A2		TRUE	FALSE	FALSE	curated	TRUE	1	1	1	1	1	1	1	1	1	1	1	1	1	1	1	1	1	1	1	1	1	1	1	1	1
CPI-SC07E958BDE	COL5A3_a11b1 complex	simple:P25940	complex:a11b1 complex	COL5A3		TRUE	FALSE	FALSE	curated	TRUE	1	1	1	1	1	1	1	1	1	1	1	1	1	1	1	1	1	1	1	1	1	1	1	1	1
CPI-SC08CC68F11	COL8A1_a11b1 complex	simple:P27658	complex:a11b1 complex	COL8A1		TRUE	FALSE	FALSE	curated	TRUE	1	1	1	1	1	1	1	1	1	1	1	1	1	1	1	1	1	1	1	1	1	1	1	1	1
CPI-SC0CE433AB8	COL4A5_a11b1 complex	simple:P29400	complex:a11b1 complex	COL4A5		TRUE	FALSE	FALSE	curated	TRUE	1	1	1	1	1	1	1	1	1	1	1	1	1	1	1	1	1	1	1	1	1	1	1	1	1
CPI-SC03BFF1D95	COL15A1_a11b1 complex	simple:P39059	complex:a11b1 complex	COL15A1		TRUE	FALSE	FALSE	curated	TRUE	1	1	1	1	1	1	1	1	1	1	1	1	1	1	1	1	1	1	1	1	1	1	1	1	1
CPI-SC03ADD2063	COL18A1_a11b1 complex	simple:P39060	complex:a11b1 complex	COL18A1		TRUE	FALSE	FALSE	curated	TRUE	1	1	1	1	1	1	1	1	1	1	1	1	1	1	1	1	1	1	1	1	1	1	1	1	1
CPI-SC0082A7233	COL4A4_a11b1 complex	simple:P53420	complex:a11b1 complex	COL4A4		TRUE	FALSE	FALSE	curated	TRUE	1	1	1	1	1	1	1	1	1	1	1	1	1	1	1	1	1	1	1	1	1	1	1	1	1
CPI-SC0674C647E	COL4A3_a11b1 complex	simple:Q01955	complex:a11b1 complex	COL4A3		TRUE	FALSE	FALSE	curated	TRUE	1	1	1	1	1	1	1	1	1	1	1	1	1	1	1	1	1	1	1	1	1	1	1	1	1
CPI-SC060984F83	COL14A1_a11b1 complex	simple:Q05707	complex:a11b1 complex	COL14A1		TRUE	FALSE	FALSE	curated	TRUE	1	1	1	1	1	1	1	1	1	1	1	1	1	1	1	1	1	1	1	1	1	1	1	1	1
CPI-SC0014D5A6E	COL16A1_a11b1 complex	simple:Q07092	complex:a11b1 complex	COL16A1		TRUE	FALSE	FALSE	curated	TRUE	1	1	1	1	1	1	1	1	1	1	1	1	1	1	1	1	1	1	1	1	1	1	1	1	1
CPI-SC0B066E03C	COL4A6_a11b1 complex	simple:Q14031	complex:a11b1 complex	COL4A6		TRUE	FALSE	FALSE	curated	TRUE	1	1	1	1	1	1	1	1	1	1	1	1	1	1	1	1	1	1	1	1	1	1	1	1	1
CPI-SC0247E9ADB	COL9A2_a11b1 complex	simple:Q14055	complex:a11b1 complex	COL9A2		TRUE	FALSE	FALSE	curated	TRUE	1	1	1	1	1	1	1	1	1	1	1	1	1	1	1	1	1	1	1	1	1	1	1	1	1
CPI-SC0035F0B0F	COL19A1_a11b1 complex	simple:Q14993	complex:a11b1 complex	COL19A1		TRUE	FALSE	FALSE	curated	TRUE	1	1	1	1	1	1	1	1	1	1	1	1	1	1	1	1	1	1	1	1	1	1	1	1	1
CPI-SC069F9E62C	COL28A1_a11b1 complex	simple:Q2UY09	complex:a11b1 complex	COL28A1		TRUE	FALSE	FALSE	curated	TRUE	1	1	1	1	1	1	1	1	1	1	1	1	1	1	1	1	1	1	1	1	1	1	1	1	1
CPI-SC0D2BDC009	COL13A1_a11b1 complex	simple:Q5TAT6	complex:a11b1 complex	COL13A1		FALSE	FALSE	FALSE	curated	TRUE	1	1	1	1	1	1	1	1	1	1	1	1	1	1	1	1	1	1	1	1	1	1	1	1	1
CPI-SC05F111D21	COL27A1_a11b1 complex	simple:Q8IZC6	complex:a11b1 complex	COL27A1		TRUE	FALSE	FALSE	curated	TRUE	1	1	1	1	1	1	1	1	1	1	1	1	1	1	1	1	1	1	1	1	1	1	1	1	1
CPI-SC041215790	COL26A1_a11b1 complex	simple:Q96A83	complex:a11b1 complex	COL26A1		TRUE	FALSE	FALSE	curated	TRUE	1	1	1	1	1	1	1	1	1	1	1	1	1	1	1	1	1	1	1	1	1	1	1	1	1
CPI-SC05B2AA866	COL12A1_a11b1 complex	simple:Q99715	complex:a11b1 complex	COL12A1		TRUE	FALSE	FALSE	curated	TRUE	1	1	1	1	1	1	1	1	1	1	1	1	1	1	1	1	1	1	1	1	1	1	1	1	1
CPI-SC051B1E9C4	COL20A1_a11b1 complex	simple:Q9P218	complex:a11b1 complex	COL20A1		TRUE	FALSE	FALSE	curated	TRUE	1	1	1	1	1	1	1	1	1	1	1	1	1	1	1	1	1	1	1	1	1	1	1	1	1
CPI-SC0247375A7	COL17A1_a11b1 complex	simple:Q9UMD9	complex:a11b1 complex	COL17A1		TRUE	FALSE	FALSE	curated	TRUE	1	1	1	1	1	1	1	1	1	1	1	1	1	1	1	1	1	1	1	1	1	1	1	1	1
CPI-SC0B808E56A	COL6A6_a1b1 complex	simple:A6NMZ7	complex:a1b1 complex	COL6A6		TRUE	FALSE	FALSE	curated	TRUE	1	1	1	1	1	1	1	1	1	1	1	1	1	1	1	1	1	1	1	1	1	1	1	1	1
CPI-SC089D4762F	COL6A5_a1b1 complex	simple:A8TX70	complex:a1b1 complex	COL6A5		TRUE	FALSE	FALSE	curated	TRUE	1	1	1	1	1	1	1	1	1	1	1	1	1	1	1	1	1	1	1	1	1	1	1	1	1
CPI-SC0F73E9099	COL1A1_a1b1 complex	simple:P02452	complex:a1b1 complex	COL1A1		TRUE	FALSE	FALSE	curated	TRUE	1	1	1	1	1	1	1	1	1	1	1	1	1	1	1	1	1	1	1	1	1	1	1	1	1
CPI-SC016235D3A	COL2A1_a1b1 complex	simple:P02458	complex:a1b1 complex	COL2A1		TRUE	FALSE	FALSE	curated	TRUE	1	1	1	1	1	1	1	1	1	1	1	1	1	1	1	1	1	1	1	1	1	1	1	1	1
CPI-SC0BC63F8C0	COL3A1_a1b1 complex	simple:P02461	complex:a1b1 complex	COL3A1		TRUE	FALSE	FALSE	curated	TRUE	1	1	1	1	1	1	1	1	1	1	1	1	1	1	1	1	1	1	1	1	1	1	1	1	1
CPI-SC0672FBD31	COL4A1_a1b1 complex	simple:P02462	complex:a1b1 complex	COL4A1		TRUE	FALSE	FALSE	curated	TRUE	1	1	1	1	1	1	1	1	1	1	1	1	1	1	1	1	1	1	1	1	1	1	1	1	1
CPI-SC0545E2502	COL5A2_a1b1 complex	simple:P05997	complex:a1b1 complex	COL5A2		TRUE	FALSE	FALSE	curated	TRUE	1	1	1	1	1	1	1	1	1	1	1	1	1	1	1	1	1	1	1	1	1	1	1	1	1
CPI-SC006E22794	COL1A2_a1b1 complex	simple:P08123	complex:a1b1 complex	COL1A2		TRUE	FALSE	FALSE	curated	TRUE	1	1	1	1	1	1	1	1	1	1	1	1	1	1	1	1	1	1	1	1	1	1	1	1	1
CPI-SC0458F68A5	COL4A2_a1b1 complex	simple:P08572	complex:a1b1 complex	COL4A2		TRUE	FALSE	FALSE	curated	TRUE	1	1	1	1	1	1	1	1	1	1	1	1	1	1	1	1	1	1	1	1	1	1	1	1	1
CPI-SC06E5E0C83	COL11A1_a1b1 complex	simple:P12107	complex:a1b1 complex	COL11A1		TRUE	FALSE	FALSE	curated	TRUE	1	1	1	1	1	1	1	1	1	1	1	1	1	1	1	1	1	1	1	1	1	1	1	1	1
CPI-SC09FDA4F45	COL6A1_a1b1 complex	simple:P12109	complex:a1b1 complex	COL6A1		TRUE	FALSE	FALSE	curated	TRUE	1	1	1	1	1	1	1	1	1	1	1	1	1	1	1	1	1	1	1	1	1	1	1	1	1
CPI-SC0F4BC2909	COL6A2_a1b1 complex	simple:P12110	complex:a1b1 complex	COL6A2		TRUE	FALSE	FALSE	curated	TRUE	1	1	1	1	1	1	1	1	1	1	1	1	1	1	1	1	1	1	1	1	1	1	1	1	1
CPI-SC02AE206BE	COL6A3_a1b1 complex	simple:P12111	complex:a1b1 complex	COL6A3		TRUE	FALSE	FALSE	curated	TRUE	1	1	1	1	1	1	1	1	1	1	1	1	1	1	1	1	1	1	1	1	1	1	1	1	1
CPI-SC0A8E69BC5	COL11A2_a1b1 complex	simple:P13942	complex:a1b1 complex	COL11A2		TRUE	FALSE	FALSE	curated	TRUE	1	1	1	1	1	1	1	1	1	1	1	1	1	1	1	1	1	1	1	1	1	1	1	1	1
CPI-SC05B6D413B	COL9A1_a1b1 complex	simple:P20849	complex:a1b1 complex	COL9A1		TRUE	FALSE	FALSE	curated	TRUE	1	1	1	1	1	1	1	1	1	1	1	1	1	1	1	1	1	1	1	1	1	1	1	1	1
CPI-SC05992FDC8	COL5A1_a1b1 complex	simple:P20908	complex:a1b1 complex	COL5A1		TRUE	FALSE	FALSE	curated	TRUE	1	1	1	1	1	1	1	1	1	1	1	1	1	1	1	1	1	1	1	1	1	1	1	1	1
CPI-SC069F95780	COL8A2_a1b1 complex	simple:P25067	complex:a1b1 complex	COL8A2		TRUE	FALSE	FALSE	curated	TRUE	1	1	1	1	1	1	1	1	1	1	1	1	1	1	1	1	1	1	1	1	1	1	1	1	1
CPI-SC0DAD29856	COL5A3_a1b1 complex	simple:P25940	complex:a1b1 complex	COL5A3		TRUE	FALSE	FALSE	curated	TRUE	1	1	1	1	1	1	1	1	1	1	1	1	1	1	1	1	1	1	1	1	1	1	1	1	1
CPI-SC02F06FF62	COL8A1_a1b1 complex	simple:P27658	complex:a1b1 complex	COL8A1		TRUE	FALSE	FALSE	curated	TRUE	1	1	1	1	1	1	1	1	1	1	1	1	1	1	1	1	1	1	1	1	1	1	1	1	1
CPI-SC0EC572716	COL4A5_a1b1 complex	simple:P29400	complex:a1b1 complex	COL4A5		TRUE	FALSE	FALSE	curated	TRUE	1	1	1	1	1	1	1	1	1	1	1	1	1	1	1	1	1	1	1	1	1	1	1	1	1
CPI-SC0F8D27FBC	COL15A1_a1b1 complex	simple:P39059	complex:a1b1 complex	COL15A1		TRUE	FALSE	FALSE	curated	TRUE	1	1	1	1	1	1	1	1	1	1	1	1	1	1	1	1	1	1	1	1	1	1	1	1	1
CPI-SC0EA3FC100	COL18A1_a1b1 complex	simple:P39060	complex:a1b1 complex	COL18A1		TRUE	FALSE	FALSE	curated	TRUE	1	1	1	1	1	1	1	1	1	1	1	1	1	1	1	1	1	1	1	1	1	1	1	1	1
CPI-SC091173D82	COL4A4_a1b1 complex	simple:P53420	complex:a1b1 complex	COL4A4		TRUE	FALSE	FALSE	curated	TRUE	1	1	1	1	1	1	1	1	1	1	1	1	1	1	1	1	1	1	1	1	1	1	1	1	1
CPI-SC07FB88720	COL4A3_a1b1 complex	simple:Q01955	complex:a1b1 complex	COL4A3		TRUE	FALSE	FALSE	curated	TRUE	1	1	1	1	1	1	1	1	1	1	1	1	1	1	1	1	1	1	1	1	1	1	1	1	1
CPI-SC0BD4C290F	COL14A1_a1b1 complex	simple:Q05707	complex:a1b1 complex	COL14A1		TRUE	FALSE	FALSE	curated	TRUE	1	1	1	1	1	1	1	1	1	1	1	1	1	1	1	1	1	1	1	1	1	1	1	1	1
CPI-SC053BBE2B1	COL16A1_a1b1 complex	simple:Q07092	complex:a1b1 complex	COL16A1		TRUE	FALSE	FALSE	curated	TRUE	1	1	1	1	1	1	1	1	1	1	1	1	1	1	1	1	1	1	1	1	1	1	1	1	1
CPI-SC0DA5EFA18	COL4A6_a1b1 complex	simple:Q14031	complex:a1b1 complex	COL4A6		TRUE	FALSE	FALSE	curated	TRUE	1	1	1	1	1	1	1	1	1	1	1	1	1	1	1	1	1	1	1	1	1	1	1	1	1
CPI-SC0F590482E	COL9A2_a1b1 complex	simple:Q14055	complex:a1b1 complex	COL9A2		TRUE	FALSE	FALSE	curated	TRUE	1	1	1	1	1	1	1	1	1	1	1	1	1	1	1	1	1	1	1	1	1	1	1	1	1
CPI-SC0BA41B0D3	COL19A1_a1b1 complex	simple:Q14993	complex:a1b1 complex	COL19A1		TRUE	FALSE	FALSE	curated	TRUE	1	1	1	1	1	1	1	1	1	1	1	1	1	1	1	1	1	1	1	1	1	1	1	1	1
CPI-SC0FF018913	COL28A1_a1b1 complex	simple:Q2UY09	complex:a1b1 complex	COL28A1		TRUE	FALSE	FALSE	curated	TRUE	1	1	1	1	1	1	1	1	1	1	1	1	1	1	1	1	1	1	1	1	1	1	1	1	1
CPI-SC08BF895FC	COL13A1_a1b1 complex	simple:Q5TAT6	complex:a1b1 complex	COL13A1		FALSE	FALSE	FALSE	curated	TRUE	1	1	1	1	1	1	1	1	1	1	1	1	1	1	1	1	1	1	1	1	1	1	1	1	1
CPI-SC0D7F33CFB	COL27A1_a1b1 complex	simple:Q8IZC6	complex:a1b1 complex	COL27A1		TRUE	FALSE	FALSE	curated	TRUE	1	1	1	1	1	1	1	1	1	1	1	1	1	1	1	1	1	1	1	1	1	1	1	1	1
CPI-SC0EACF2D60	COL26A1_a1b1 complex	simple:Q96A83	complex:a1b1 complex	COL26A1		TRUE	FALSE	FALSE	curated	TRUE	1	1	1	1	1	1	1	1	1	1	1	1	1	1	1	1	1	1	1	1	1	1	1	1	1
CPI-SC004A436C5	COL12A1_a1b1 complex	simple:Q99715	complex:a1b1 complex	COL12A1		TRUE	FALSE	FALSE	curated	TRUE	1	1	1	1	1	1	1	1	1	1	1	1	1	1	1	1	1	1	1	1	1	1	1	1	1
CPI-SC00BE2EEE3	COL20A1_a1b1 complex	simple:Q9P218	complex:a1b1 complex	COL20A1		TRUE	FALSE	FALSE	curated	TRUE	1	1	1	1	1	1	1	1	1	1	1	1	1	1	1	1	1	1	1	1	1	1	1	1	1
CPI-SC08AA91C84	COL17A1_a1b1 complex	simple:Q9UMD9	complex:a1b1 complex	COL17A1		TRUE	FALSE	FALSE	curated	TRUE	1	1	1	1	1	1	1	1	1	1	1	1	1	1	1	1	1	1	1	1	1	1	1	1	1
CPI-SC0EAF80261	SEMA7A_a1b1 complex	simple:O75326	complex:a1b1 complex	SEMA7A		FALSE	FALSE	FALSE	curated	TRUE	1	1	1	1	1	1	1	1	1	1	1	1	1	1	1	1	1	1	1	1	1	1	1	1	1
CPI-SC05D87F723	COL6A6_a2b1 complex	simple:A6NMZ7	complex:a2b1 complex	COL6A6		TRUE	FALSE	FALSE	curated	TRUE	1	1	1	1	1	1	1	1	1	1	1	1	1	1	1	1	1	1	1	1	1	1	1	1	1
CPI-SC0606C6896	COL6A5_a2b1 complex	simple:A8TX70	complex:a2b1 complex	COL6A5		TRUE	FALSE	FALSE	curated	TRUE	1	1	1	1	1	1	1	1	1	1	1	1	1	1	1	1	1	1	1	1	1	1	1	1	1
CPI-SC01EA4FF6B	COL1A1_a2b1 complex	simple:P02452	complex:a2b1 complex	COL1A1		TRUE	FALSE	FALSE	curated	TRUE	1	1	1	1	1	1	1	1	1	1	1	1	1	1	1	1	1	1	1	1	1	1	1	1	1
CPI-SC036D78A43	COL2A1_a2b1 complex	simple:P02458	complex:a2b1 complex	COL2A1		TRUE	FALSE	FALSE	curated	TRUE	1	1	1	1	1	1	1	1	1	1	1	1	1	1	1	1	1	1	1	1	1	1	1	1	1
CPI-SC054484F7B	COL3A1_a2b1 complex	simple:P02461	complex:a2b1 complex	COL3A1		TRUE	FALSE	FALSE	curated	TRUE	1	1	1	1	1	1	1	1	1	1	1	1	1	1	1	1	1	1	1	1	1	1	1	1	1
CPI-SC02392F4AF	COL4A1_a2b1 complex	simple:P02462	complex:a2b1 complex	COL4A1		TRUE	FALSE	FALSE	curated	TRUE	1	1	1	1	1	1	1	1	1	1	1	1	1	1	1	1	1	1	1	1	1	1	1	1	1
CPI-SC01FFC9392	FN1_a2b1 complex	simple:P02751	complex:a2b1 complex	FN1		TRUE	FALSE	FALSE	curated	TRUE	1	1	1	1	1	1	1	1	1	1	1	1	1	1	1	1	1	1	1	1	1	1	1	1	1
CPI-SC0CA7B34A5	COL5A2_a2b1 complex	simple:P05997	complex:a2b1 complex	COL5A2		TRUE	FALSE	FALSE	curated	TRUE	1	1	1	1	1	1	1	1	1	1	1	1	1	1	1	1	1	1	1	1	1	1	1	1	1
CPI-SC05CCF815E	COL1A2_a2b1 complex	simple:P08123	complex:a2b1 complex	COL1A2		TRUE	FALSE	FALSE	curated	TRUE	1	1	1	1	1	1	1	1	1	1	1	1	1	1	1	1	1	1	1	1	1	1	1	1	1
CPI-SC07222A428	COL4A2_a2b1 complex	simple:P08572	complex:a2b1 complex	COL4A2		TRUE	FALSE	FALSE	curated	TRUE	1	1	1	1	1	1	1	1	1	1	1	1	1	1	1	1	1	1	1	1	1	1	1	1	1
CPI-SC0FBFA176B	COL11A1_a2b1 complex	simple:P12107	complex:a2b1 complex	COL11A1		TRUE	FALSE	FALSE	curated	TRUE	1	1	1	1	1	1	1	1	1	1	1	1	1	1	1	1	1	1	1	1	1	1	1	1	1
CPI-SC08D8A859F	COL6A1_a2b1 complex	simple:P12109	complex:a2b1 complex	COL6A1		TRUE	FALSE	FALSE	curated	TRUE	1	1	1	1	1	1	1	1	1	1	1	1	1	1	1	1	1	1	1	1	1	1	1	1	1
CPI-SC0814068D9	COL6A2_a2b1 complex	simple:P12110	complex:a2b1 complex	COL6A2		TRUE	FALSE	FALSE	curated	TRUE	1	1	1	1	1	1	1	1	1	1	1	1	1	1	1	1	1	1	1	1	1	1	1	1	1
CPI-SC0D870AE49	COL6A3_a2b1 complex	simple:P12111	complex:a2b1 complex	COL6A3		TRUE	FALSE	FALSE	curated	TRUE	1	1	1	1	1	1	1	1	1	1	1	1	1	1	1	1	1	1	1	1	1	1	1	1	1
CPI-SC0E4E54E13	COL11A2_a2b1 complex	simple:P13942	complex:a2b1 complex	COL11A2		TRUE	FALSE	FALSE	curated	TRUE	1	1	1	1	1	1	1	1	1	1	1	1	1	1	1	1	1	1	1	1	1	1	1	1	1
CPI-SC08F797F90	COL9A1_a2b1 complex	simple:P20849	complex:a2b1 complex	COL9A1		TRUE	FALSE	FALSE	curated	TRUE	1	1	1	1	1	1	1	1	1	1	1	1	1	1	1	1	1	1	1	1	1	1	1	1	1
CPI-SC035134F18	COL5A1_a2b1 complex	simple:P20908	complex:a2b1 complex	COL5A1		TRUE	FALSE	FALSE	curated	TRUE	1	1	1	1	1	1	1	1	1	1	1	1	1	1	1	1	1	1	1	1	1	1	1	1	1
CPI-SC04B354AE3	COL8A2_a2b1 complex	simple:P25067	complex:a2b1 complex	COL8A2		TRUE	FALSE	FALSE	curated	TRUE	1	1	1	1	1	1	1	1	1	1	1	1	1	1	1	1	1	1	1	1	1	1	1	1	1
CPI-SC0FC645961	COL5A3_a2b1 complex	simple:P25940	complex:a2b1 complex	COL5A3		TRUE	FALSE	FALSE	curated	TRUE	1	1	1	1	1	1	1	1	1	1	1	1	1	1	1	1	1	1	1	1	1	1	1	1	1
CPI-SC058845C44	COL8A1_a2b1 complex	simple:P27658	complex:a2b1 complex	COL8A1		TRUE	FALSE	FALSE	curated	TRUE	1	1	1	1	1	1	1	1	1	1	1	1	1	1	1	1	1	1	1	1	1	1	1	1	1
CPI-SC09C0B5D08	COL4A5_a2b1 complex	simple:P29400	complex:a2b1 complex	COL4A5		TRUE	FALSE	FALSE	curated	TRUE	1	1	1	1	1	1	1	1	1	1	1	1	1	1	1	1	1	1	1	1	1	1	1	1	1
CPI-SC039D075C6	COL15A1_a2b1 complex	simple:P39059	complex:a2b1 complex	COL15A1		TRUE	FALSE	FALSE	curated	TRUE	1	1	1	1	1	1	1	1	1	1	1	1	1	1	1	1	1	1	1	1	1	1	1	1	1
CPI-SC04B0064C4	COL18A1_a2b1 complex	simple:P39060	complex:a2b1 complex	COL18A1		TRUE	FALSE	FALSE	curated	TRUE	1	1	1	1	1	1	1	1	1	1	1	1	1	1	1	1	1	1	1	1	1	1	1	1	1
CPI-SC03DD752AB	COL4A4_a2b1 complex	simple:P53420	complex:a2b1 complex	COL4A4		TRUE	FALSE	FALSE	curated	TRUE	1	1	1	1	1	1	1	1	1	1	1	1	1	1	1	1	1	1	1	1	1	1	1	1	1
CPI-SC052A417CB	COL4A3_a2b1 complex	simple:Q01955	complex:a2b1 complex	COL4A3		TRUE	FALSE	FALSE	curated	TRUE	1	1	1	1	1	1	1	1	1	1	1	1	1	1	1	1	1	1	1	1	1	1	1	1	1
CPI-SC0E0C50FCA	COL14A1_a2b1 complex	simple:Q05707	complex:a2b1 complex	COL14A1		TRUE	FALSE	FALSE	curated	TRUE	1	1	1	1	1	1	1	1	1	1	1	1	1	1	1	1	1	1	1	1	1	1	1	1	1
CPI-SC01E9FAC20	COL16A1_a2b1 complex	simple:Q07092	complex:a2b1 complex	COL16A1		TRUE	FALSE	FALSE	curated	TRUE	1	1	1	1	1	1	1	1	1	1	1	1	1	1	1	1	1	1	1	1	1	1	1	1	1
CPI-SC061137A41	COL4A6_a2b1 complex	simple:Q14031	complex:a2b1 complex	COL4A6		TRUE	FALSE	FALSE	curated	TRUE	1	1	1	1	1	1	1	1	1	1	1	1	1	1	1	1	1	1	1	1	1	1	1	1	1
CPI-SC08226CD3B	COL9A2_a2b1 complex	simple:Q14055	complex:a2b1 complex	COL9A2		TRUE	FALSE	FALSE	curated	TRUE	1	1	1	1	1	1	1	1	1	1	1	1	1	1	1	1	1	1	1	1	1	1	1	1	1
CPI-SC0ADD7BEF0	COL19A1_a2b1 complex	simple:Q14993	complex:a2b1 complex	COL19A1		TRUE	FALSE	FALSE	curated	TRUE	1	1	1	1	1	1	1	1	1	1	1	1	1	1	1	1	1	1	1	1	1	1	1	1	1
CPI-SC083EDDA21	COL28A1_a2b1 complex	simple:Q2UY09	complex:a2b1 complex	COL28A1		TRUE	FALSE	FALSE	curated	TRUE	1	1	1	1	1	1	1	1	1	1	1	1	1	1	1	1	1	1	1	1	1	1	1	1	1
CPI-SC0CCF30377	COL13A1_a2b1 complex	simple:Q5TAT6	complex:a2b1 complex	COL13A1		FALSE	FALSE	FALSE	curated	TRUE	1	1	1	1	1	1	1	1	1	1	1	1	1	1	1	1	1	1	1	1	1	1	1	1	1
CPI-SC0CE6F5084	COL27A1_a2b1 complex	simple:Q8IZC6	complex:a2b1 complex	COL27A1		TRUE	FALSE	FALSE	curated	TRUE	1	1	1	1	1	1	1	1	1	1	1	1	1	1	1	1	1	1	1	1	1	1	1	1	1
CPI-SC0AD6D8724	COL26A1_a2b1 complex	simple:Q96A83	complex:a2b1 complex	COL26A1		TRUE	FALSE	FALSE	curated	TRUE	1	1	1	1	1	1	1	1	1	1	1	1	1	1	1	1	1	1	1	1	1	1	1	1	1
CPI-SC0F300DE24	COL12A1_a2b1 complex	simple:Q99715	complex:a2b1 complex	COL12A1		TRUE	FALSE	FALSE	curated	TRUE	1	1	1	1	1	1	1	1	1	1	1	1	1	1	1	1	1	1	1	1	1	1	1	1	1
CPI-SC00064A9CE	COL20A1_a2b1 complex	simple:Q9P218	complex:a2b1 complex	COL20A1		TRUE	FALSE	FALSE	curated	TRUE	1	1	1	1	1	1	1	1	1	1	1	1	1	1	1	1	1	1	1	1	1	1	1	1	1
CPI-SC06873D10F	COL17A1_a2b1 complex	simple:Q9UMD9	complex:a2b1 complex	COL17A1		TRUE	FALSE	FALSE	curated	TRUE	1	1	1	1	1	1	1	1	1	1	1	1	1	1	1	1	1	1	1	1	1	1	1	1	1
CPI-SC0E3784FFB	LAMC1_a2b1 complex	simple:P11047	complex:a2b1 complex	LAMC1		TRUE	FALSE	FALSE	curated	TRUE	1	1	1	1	1	1	1	1	1	1	1	1	1	1	1	1	1	1	1	1	1	1	1	1	1
CPI-SC0D9B795CC	CDH1_a2b1 complex	simple:P12830	complex:a2b1 complex	CDH1		FALSE	FALSE	FALSE	curated	TRUE	1	1	1	1	1	1	1	1	1	1	1	1	1	1	1	1	1	1	1	1	1	1	1	1	1
CPI-SC08B6B74FB	FN1_a2Bb3 complex	simple:P02751	complex:a2Bb3 complex	FN1		TRUE	FALSE	FALSE	curated	TRUE	1	1	1	1	1	1	1	1	1	1	1	1	1	1	1	1	1	1	1	1	1	1	1	1	1
CPI-SC0BAB29E69	F2_a2Bb3 complex	simple:P00734	complex:a2Bb3 complex	F2		TRUE	FALSE	FALSE	curated	TRUE	1	1	1	1	1	1	1	1	1	1	1	1	1	1	1	1	1	1	1	1	1	1	1	1	1
CPI-SC08067D831	VTN_a2Bb3 complex	simple:P04004	complex:a2Bb3 complex	VTN		TRUE	FALSE	FALSE	curated	TRUE	1	1	1	1	1	1	1	1	1	1	1	1	1	1	1	1	1	1	1	1	1	1	1	1	1
CPI-SC0200AC9E3	THBS1_a2Bb3 complex	simple:P07996	complex:a2Bb3 complex	THBS1		FALSE	FALSE	FALSE	curated	TRUE	1	1	1	1	1	1	1	1	1	1	1	1	1	1	1	1	1	1	1	1	1	1	1	1	1
CPI-SC090855C8E	FN1_aVb3 complex	simple:P02751	complex:aVb3 complex	FN1		TRUE	FALSE	FALSE	curated	TRUE	1	1	1	1	1	1	1	1	1	1	1	1	1	1	1	1	1	1	1	1	1	1	1	1	1
CPI-SC0B9199C7F	LAMC1_aVb3 complex	simple:P11047	complex:aVb3 complex	LAMC1		TRUE	FALSE	FALSE	curated	TRUE	1	1	1	1	1	1	1	1	1	1	1	1	1	1	1	1	1	1	1	1	1	1	1	1	1
CPI-SC0EC380922	F2_aVb3 complex	simple:P00734	complex:aVb3 complex	F2		TRUE	FALSE	FALSE	curated	TRUE	1	1	1	1	1	1	1	1	1	1	1	1	1	1	1	1	1	1	1	1	1	1	1	1	1
CPI-SC0530C27A8	VTN_aVb3 complex	simple:P04004	complex:aVb3 complex	VTN		TRUE	FALSE	FALSE	curated	TRUE	1	1	1	1	1	1	1	1	1	1	1	1	1	1	1	1	1	1	1	1	1	1	1	1	1
CPI-SC0755598EE	THBS1_aVb3 complex	simple:P07996	complex:aVb3 complex	THBS1		FALSE	FALSE	FALSE	curated	TRUE	1	1	1	1	1	1	1	1	1	1	1	1	1	1	1	1	1	1	1	1	1	1	1	1	1
CPI-SC044E3F9B6	FGF2_aVb3 complex	simple:P09038	complex:aVb3 complex	FGF2		TRUE	FALSE	FALSE	curated	TRUE	1	1	1	1	1	1	1	1	1	1	1	1	1	1	1	1	1	1	1	1	1	1	1	1	1
CPI-SC0988E0218	SPP1_aVb3 complex	simple:P10451	complex:aVb3 complex	SPP1		TRUE	FALSE	FALSE	curated	TRUE	1	1	1	1	1	1	1	1	1	1	1	1	1	1	1	1	1	1	1	1	1	1	1	1	1
CPI-SC0E2D0DC4B	FGF1_aVb3 complex	simple:P05230	complex:aVb3 complex	FGF1		TRUE	FALSE	FALSE	curated	TRUE	1	1	1	1	1	1	1	1	1	1	1	1	1	1	1	1	1	1	1	1	1	1	1	1	1
CPI-SC00756BB93	THY1_aVb3 complex	simple:P04216	complex:aVb3 complex	THY1		FALSE	FALSE	FALSE	curated	TRUE	1	1	1	1	1	1	1	1	1	1	1	1	1	1	1	1	1	1	1	1	1	1	1	1	1
CPI-SC0E1037D03	VWF_aVb3 complex	simple:P04275	complex:aVb3 complex	VWF		TRUE	FALSE	FALSE	curated	TRUE	1	1	1	1	1	1	1	1	1	1	1	1	1	1	1	1	1	1	1	1	1	1	1	1	1
CPI-SC05A209BEC	FCER2_aVb3 complex	simple:P06734	complex:aVb3 complex	FCER2		TRUE	TRUE	FALSE	curated	TRUE	1	1	1	1	1	1	1	1	1	1	1	1	1	1	1	1	1	1	1	1	1	1	1	1	1
CPI-SC02E74AFA5	MMP2_aVb3 complex	simple:P08253	complex:aVb3 complex	MMP2		TRUE	FALSE	FALSE	curated	TRUE	1	1	1	1	1	1	1	1	1	1	1	1	1	1	1	1	1	1	1	1	1	1	1	1	1
CPI-SC0A58E6695	TNC_aVb3 complex	simple:P24821	complex:aVb3 complex	TNC		TRUE	FALSE	FALSE	curated	TRUE	1	1	1	1	1	1	1	1	1	1	1	1	1	1	1	1	1	1	1	1	1	1	1	1	1
CPI-SC06525B099	L1CAM_aVb3 complex	simple:P32004	complex:aVb3 complex	L1CAM		FALSE	FALSE	FALSE	curated	TRUE	1	1	1	1	1	1	1	1	1	1	1	1	1	1	1	1	1	1	1	1	1	1	1	1	1
CPI-SC095A2C115	PLAUR_aVb3 complex	simple:Q03405	complex:aVb3 complex	PLAUR		TRUE	TRUE	FALSE	curated	TRUE	1	1	1	1	1	1	1	1	1	1	1	1	1	1	1	1	1	1	1	1	1	1	1	1	1
CPI-SC0EFCE145F	OMD_aVb3 complex	simple:Q99983	complex:aVb3 complex	OMD		TRUE	FALSE	FALSE	curated	TRUE	1	1	1	1	1	1	1	1	1	1	1	1	1	1	1	1	1	1	1	1	1	1	1	1	1
CPI-SC04F2478E9	FN1_a3b1 complex	simple:P02751	complex:a3b1 complex	FN1		TRUE	FALSE	FALSE	curated	TRUE	1	1	1	1	1	1	1	1	1	1	1	1	1	1	1	1	1	1	1	1	1	1	1	1	1
CPI-SC02BFEEC8A	THBS1_a3b1 complex	simple:P07996	complex:a3b1 complex	THBS1		FALSE	FALSE	FALSE	curated	TRUE	1	1	1	1	1	1	1	1	1	1	1	1	1	1	1	1	1	1	1	1	1	1	1	1	1
CPI-SC0ED0520DD	LAMA3_a3b1 complex	simple:Q16787	complex:a3b1 complex	LAMA3		TRUE	FALSE	FALSE	curated	TRUE	1	1	1	1	1	1	1	1	1	1	1	1	1	1	1	1	1	1	1	1	1	1	1	1	1
CPI-SC09938698A	CSPG4_a3b1 complex	simple:Q6UVK1	complex:a3b1 complex	CSPG4		FALSE	FALSE	FALSE	curated	TRUE	1	1	1	1	1	1	1	1	1	1	1	1	1	1	1	1	1	1	1	1	1	0	1	1	1
CPI-SC06364D669	FN1_a4b1 complex	simple:P02751	complex:a4b1 complex	FN1		TRUE	FALSE	FALSE	curated	TRUE	1	1	1	1	1	1	1	1	1	1	1	1	1	1	1	1	1	1	1	1	1	1	1	1	1
CPI-SC07BE7830D	SPP1_a4b1 complex	simple:P10451	complex:a4b1 complex	SPP1		TRUE	FALSE	FALSE	curated	TRUE	1	1	1	1	1	1	1	1	1	1	1	1	1	1	1	1	1	1	1	1	1	1	1	1	1
CPI-SC0BC542ACC	TNC_a4b1 complex	simple:P24821	complex:a4b1 complex	TNC		TRUE	FALSE	FALSE	curated	TRUE	1	1	1	1	1	1	1	1	1	1	1	1	1	1	1	1	1	1	1	1	1	1	1	1	1
CPI-SC0E9C058EB	PLAUR_a4b1 complex	simple:Q03405	complex:a4b1 complex	PLAUR		TRUE	TRUE	FALSE	curated	TRUE	1	1	1	1	1	1	1	1	1	1	1	1	1	1	1	1	1	1	1	1	1	1	1	1	1
CPI-SC0A9EB628A	VCAM1_a4b1 complex	simple:P19320	complex:a4b1 complex	VCAM1		FALSE	FALSE	FALSE	curated	TRUE	1	1	1	1	1	1	1	1	1	1	1	1	1	1	1	1	1	1	1	1	1	1	1	1	1
CPI-SC070D5A96F	JAM2_a4b1 complex	simple:P57087	complex:a4b1 complex	JAM2		FALSE	FALSE	FALSE	curated	TRUE	1	1	1	1	1	1	1	1	1	1	1	1	1	1	1	1	1	1	1	1	1	1	1	1	1
CPI-SC0B4D7E0FF	FN1_a4b7 complex	simple:P02751	complex:a4b7 complex	FN1		TRUE	FALSE	FALSE	curated	TRUE	1	1	1	1	1	1	1	1	1	1	1	1	1	1	1	1	1	1	1	1	1	1	1	1	1
CPI-SC08E97F7CA	VCAM1_a4b7 complex	simple:P19320	complex:a4b7 complex	VCAM1		FALSE	FALSE	FALSE	curated	TRUE	1	1	1	1	1	1	1	1	1	1	1	1	1	1	1	1	1	1	1	1	1	1	1	1	1
CPI-SC092C3E4DF	FN1_a8b1 complex	simple:P02751	complex:a8b1 complex	FN1		TRUE	FALSE	FALSE	curated	TRUE	1	1	1	1	1	1	1	1	1	1	1	1	1	1	1	1	1	1	1	1	1	1	1	1	1
CPI-SC01195CB48	TNC_a8b1 complex	simple:P24821	complex:a8b1 complex	TNC		TRUE	FALSE	FALSE	curated	TRUE	1	1	1	1	1	1	1	1	1	1	1	1	1	1	1	1	1	1	1	1	1	1	1	1	1
CPI-SC096929DB0	FN1_aVb1 complex	simple:P02751	complex:aVb1 complex	FN1		TRUE	FALSE	FALSE	curated	TRUE	1	1	1	1	1	1	1	1	1	1	1	1	1	1	1	1	1	1	1	1	1	1	1	1	1
CPI-SC067AD890A	VTN_aVb1 complex	simple:P04004	complex:aVb1 complex	VTN		TRUE	FALSE	FALSE	curated	TRUE	1	1	1	1	1	1	1	1	1	1	1	1	1	1	1	1	1	1	1	1	1	1	1	1	1
CPI-SC0847A64D2	FN1_aVb5 complex	simple:P02751	complex:aVb5 complex	FN1		TRUE	FALSE	FALSE	curated	TRUE	1	1	1	1	1	1	1	1	1	1	1	1	1	1	1	1	1	1	1	1	1	1	1	1	1
CPI-SC0EEF3A379	LAMC1_a6b1 complex	simple:P11047	complex:a6b1 complex	LAMC1		TRUE	FALSE	FALSE	curated	TRUE	1	1	1	0	1	1	1	0	0	1	1	1	1	1	1	1	1	1	1	1	1	1	0	0	1
CPI-SS0CC5DCE80	CDH1_KLRG1	simple:P12830	simple:Q96E93	CDH1	KLRG1	FALSE	FALSE	TRUE	curated	FALSE	1	1	1	1	1	1	1	1	1	1	1	1	1	1	1	1	1	1	1	1	1	1	1	1	1
CPI-SC007890A1C	CDH1_aEb7 complex	simple:P12830	complex:aEb7 complex	CDH1		FALSE	FALSE	FALSE	curated	TRUE	1	1	1	1	1	1	1	1	1	1	1	1	1	1	1	1	1	1	1	1	1	1	1	1	1
CPI-SS03DA2A820	FGF2_CD44	simple:P09038	simple:P16070	FGF2	CD44	TRUE	FALSE	TRUE	I2D,InnateDB-All	FALSE	1	1	1	1	1	1	1	1	1	1	1	1	1	1	1	1	1	1	1	1	1	1	1	1	1
CPI-SS02AB0C3E0	SPP1_CD44	simple:P10451	simple:P16070	SPP1	CD44	TRUE	FALSE	TRUE	I2D,IMEx,InnateDB-All,IntAct	FALSE	1	1	1	1	1	1	1	1	1	1	1	1	1	1	1	1	1	1	1	1	1	1	1	1	1
CPI-SS03722104E	HGF_CD44	simple:P14210	simple:P16070	HGF	CD44	TRUE	FALSE	TRUE	IMEx,InnateDB-All,IntAct	FALSE	1	1	1	1	1	1	1	1	1	1	1	1	1	1	1	1	1	1	1	1	1	1	1	1	1
CPI-SS008FB916C	FGF2_FGFR4	simple:P09038	simple:P22455	FGF2	FGFR4	TRUE	FALSE	TRUE	curated	FALSE	1	1	1	1	1	1	1	1	1	1	1	1	1	1	1	1	1	1	1	1	1	1	1	1	1
CPI-SS0D9366D11	FGF1_FGFR4	simple:P05230	simple:P22455	FGF1	FGFR4	TRUE	FALSE	TRUE	I2D,IMEx,InnateDB-All,IntAct	FALSE	1	1	1	1	1	1	1	1	1	1	1	1	1	1	1	1	1	1	1	1	1	1	1	1	1
CPI-SS0AC594A8E	FGF17_FGFR4	simple:O60258	simple:P22455	FGF17	FGFR4	TRUE	FALSE	TRUE	I2D	FALSE	1	1	1	1	1	1	1	1	1	1	1	1	1	1	1	1	1	1	1	1	1	1	1	1	1
CPI-SS0D4CA5D92	FGF18_FGFR4	simple:O76093	simple:P22455	FGF18	FGFR4	TRUE	FALSE	TRUE	I2D	FALSE	1	1	1	1	1	1	1	1	1	1	1	1	1	1	1	1	1	1	1	1	1	1	1	1	1
CPI-SS05ECF1933	FGF3_FGFR4	simple:P11487	simple:P22455	FGF3	FGFR4	TRUE	FALSE	TRUE	I2D	FALSE	1	1	1	1	1	1	1	1	1	1	1	1	1	1	1	1	1	1	1	1	1	1	1	1	1
CPI-SS066347638	FGF5_FGFR4	simple:P12034	simple:P22455	FGF5	FGFR4	TRUE	FALSE	TRUE	I2D,IMEx,InnateDB-All,IntAct	FALSE	1	1	1	1	1	1	1	1	1	1	1	1	1	1	1	1	1	1	1	1	1	1	1	1	1
CPI-SS0D95D41D6	FGF7_FGFR4	simple:P21781	simple:P22455	FGF7	FGFR4	TRUE	FALSE	TRUE	I2D	FALSE	1	1	1	1	1	1	1	1	1	1	1	1	1	1	1	1	1	1	1	1	1	1	1	1	1
CPI-SS01F67987A	FGF2_FGFR1	simple:P09038	simple:P11362	FGF2	FGFR1	TRUE	FALSE	TRUE	curated	FALSE	1	1	1	1	1	1	1	1	1	1	1	1	1	1	1	1	1	1	1	1	1	1	1	1	1
CPI-SS0755A26DD	FGF1_FGFR1	simple:P05230	simple:P11362	FGF1	FGFR1	TRUE	FALSE	TRUE	curated	FALSE	1	0	1	1	1	1	0	0	1	0	1	0	1	1	1	1	1	1	1	1	1	0	1	1	1
CPI-SS0467AFD8A	FGF17_FGFR1	simple:O60258	simple:P11362	FGF17	FGFR1	TRUE	FALSE	TRUE	I2D,InnateDB-All	FALSE	1	1	1	1	1	1	1	1	1	1	1	1	1	1	1	1	1	1	1	1	1	1	1	1	1
CPI-SS0F2C6A4D4	FGF18_FGFR1	simple:O76093	simple:P11362	FGF18	FGFR1	TRUE	FALSE	TRUE	I2D	FALSE	1	1	1	1	1	1	1	1	1	1	1	1	1	1	1	1	1	1	1	1	1	1	1	1	1
CPI-SS03189F5F6	FGF10_FGFR1	simple:O15520	simple:P11362	FGF10	FGFR1	TRUE	FALSE	TRUE	InnateDB-All	FALSE	1	1	1	1	1	1	0	0	1	1	1	1	1	1	1	1	1	1	1	1	1	1	1	1	1
CPI-SS05A94DE17	FGF2_FGFR2	simple:P09038	simple:P21802	FGF2	FGFR2	TRUE	FALSE	TRUE	curated	FALSE	1	1	1	1	1	1	1	1	1	1	1	1	1	1	1	1	1	1	1	1	1	1	1	1	1
CPI-SS04A97448D	FGF1_FGFR2	simple:P05230	simple:P21802	FGF1	FGFR2	TRUE	FALSE	TRUE	I2D,IMEx,InnateDB-All,IntAct,MINT	FALSE	1	0	1	1	1	0	0	1	1	1	1	0	1	1	1	1	1	1	1	1	1	0	1	1	1
CPI-SS06B86672A	CD44_FGFR2	simple:P16070	simple:P21802	CD44	FGFR2	TRUE	TRUE	TRUE	InnateDB-All	FALSE	1	1	1	1	1	1	1	1	1	1	1	1	1	1	1	1	1	1	1	1	1	1	1	1	1
CPI-SS0330D939A	FGF17_FGFR2	simple:O60258	simple:P21802	FGF17	FGFR2	TRUE	FALSE	TRUE	I2D,InnateDB-All	FALSE	1	1	1	1	1	1	1	1	1	1	1	1	1	1	1	1	1	1	1	1	1	1	1	1	1
CPI-SS0F6A7A4DF	FGF18_FGFR2	simple:O76093	simple:P21802	FGF18	FGFR2	TRUE	FALSE	TRUE	I2D	FALSE	1	1	1	1	1	1	1	1	1	1	1	1	1	1	1	1	1	1	1	1	1	1	1	1	1
CPI-SS06D341996	FGF3_FGFR2	simple:P11487	simple:P21802	FGF3	FGFR2	TRUE	FALSE	TRUE	I2D,InnateDB-All	FALSE	1	1	1	1	1	1	1	1	1	1	1	1	1	1	1	1	1	1	1	1	1	1	1	1	1
CPI-SS02FEAF02E	FGF5_FGFR2	simple:P12034	simple:P21802	FGF5	FGFR2	TRUE	FALSE	TRUE	I2D,IMEx,InnateDB-All,IntAct	FALSE	1	1	1	1	1	1	1	1	1	1	1	1	1	1	1	1	1	1	1	1	1	1	1	1	1
CPI-SS0E928B8C8	FGF7_FGFR2	simple:P21781	simple:P21802	FGF7	FGFR2	TRUE	FALSE	TRUE	I2D,IMEx,InnateDB-All,IntAct	FALSE	1	1	1	1	1	1	1	1	1	1	1	1	1	1	1	1	1	1	1	1	1	1	1	1	1
CPI-SS0AECC113F	FGF10_FGFR2	simple:O15520	simple:P21802	FGF10	FGFR2	TRUE	FALSE	TRUE	I2D,IMEx,InnateDB-All,IntAct	FALSE	1	1	1	1	1	1	0	1	1	1	1	1	1	1	1	1	1	1	1	1	1	1	1	1	1
CPI-SS0735F5C3A	TIMP1_FGFR2	simple:P01033	simple:P21802	TIMP1	FGFR2	TRUE	FALSE	TRUE	InnateDB-All	FALSE	1	1	1	1	1	1	1	1	1	1	1	1	1	1	1	1	1	1	1	1	1	1	1	1	1
CPI-SS0DC322B61	ROS1_FGFR2	simple:P08922	simple:P21802	ROS1	FGFR2	TRUE	TRUE	TRUE	I2D	FALSE	1	1	1	1	1	1	1	1	1	1	1	1	1	1	1	1	1	1	1	1	1	1	1	1	1
CPI-SS0348DB5E3	FGFR1_FGFR2	simple:P11362	simple:P21802	FGFR1	FGFR2	TRUE	TRUE	TRUE	InnateDB-All	FALSE	1	1	1	1	1	1	0	1	1	1	1	0	1	1	1	1	1	1	1	1	1	0	1	1	1
CPI-SS0D636A374	FGF2_FGFR3	simple:P09038	simple:P22607	FGF2	FGFR3	TRUE	FALSE	TRUE	curated	FALSE	1	1	1	1	1	1	1	1	1	1	1	1	1	1	1	1	1	1	1	1	1	1	1	1	1
CPI-SS015819E65	FGF1_FGFR3	simple:P05230	simple:P22607	FGF1	FGFR3	TRUE	FALSE	TRUE	I2D,IMEx,InnateDB-All,IntAct	FALSE	1	1	0	1	1	1	1	0	1	1	1	1	0	1	1	1	1	1	1	1	1	1	0	1	1
CPI-SS0BC9F7E9E	FGF17_FGFR3	simple:O60258	simple:P22607	FGF17	FGFR3	TRUE	FALSE	TRUE	I2D	FALSE	1	1	1	1	1	1	1	1	1	1	1	1	1	1	1	1	1	1	1	1	1	1	1	1	1
CPI-SS0E134097C	FGF18_FGFR3	simple:O76093	simple:P22607	FGF18	FGFR3	TRUE	FALSE	TRUE	I2D	FALSE	1	1	1	1	1	1	1	1	1	1	1	1	1	1	1	1	1	1	1	1	1	1	1	1	1
CPI-SS0C2A73A10	FGF3_FGFR3	simple:P11487	simple:P22607	FGF3	FGFR3	TRUE	FALSE	TRUE	I2D	FALSE	1	1	1	1	1	1	1	1	1	1	1	1	1	1	1	1	1	1	1	1	1	1	1	1	1
CPI-SS076D8A297	FGF5_FGFR3	simple:P12034	simple:P22607	FGF5	FGFR3	TRUE	FALSE	TRUE	I2D	FALSE	1	1	1	1	1	1	1	1	1	1	1	1	1	1	1	1	1	1	1	1	1	1	1	1	1
CPI-SS00E68BB92	FGF7_FGFR3	simple:P21781	simple:P22607	FGF7	FGFR3	TRUE	FALSE	TRUE	I2D	FALSE	1	1	1	1	1	1	1	1	1	1	1	1	1	1	1	1	1	1	1	1	1	1	1	1	1
CPI-SS0BF3ED143	FGFR2_FGFR3	simple:P21802	simple:P22607	FGFR2	FGFR3	TRUE	TRUE	TRUE	IMEx,InnateDB-All	FALSE	1	1	0	1	1	1	1	0	1	1	1	1	0	1	1	1	1	1	1	1	1	1	1	1	1
CPI-SS0CB6968B9	FGF2_FGFRL1	simple:P09038	simple:Q8N441	FGF2	FGFRL1	TRUE	FALSE	TRUE	I2D	FALSE	1	1	1	1	1	1	1	1	1	1	1	1	1	1	1	1	1	1	1	1	1	1	1	1	1
CPI-SS0C1BD22BC	SPP1_PTGER4	simple:P10451	simple:P35408	SPP1	PTGER4	TRUE	FALSE	TRUE	IMEx,MINT	FALSE	1	1	1	1	1	1	0	1	1	1	1	1	1	1	1	1	1	1	1	1	1	1	1	1	1
CPI-SC01AB9BED7	SPP1_a9b1 complex	simple:P10451	complex:a9b1 complex	SPP1		TRUE	FALSE	FALSE	curated	TRUE	1	1	1	1	1	1	0	1	0	0	1	1	1	1	1	1	1	1	1	1	1	1	1	1	1
CPI-SC056BF6CBB	TNC_a9b1 complex	simple:P24821	complex:a9b1 complex	TNC		TRUE	FALSE	FALSE	curated	TRUE	1	1	1	1	1	1	1	1	1	1	1	1	1	1	1	1	1	1	1	1	1	1	1	1	1
CPI-SC062D34C2A	VCAM1_a9b1 complex	simple:P19320	complex:a9b1 complex	VCAM1		FALSE	FALSE	FALSE	curated	TRUE	1	1	1	1	1	1	1	1	1	1	1	1	1	1	1	1	1	1	1	1	1	1	1	1	1
CPI-SS068C742A1	FGF1_TGFBR3	simple:P05230	simple:Q03167	FGF1	TGFBR3	TRUE	FALSE	TRUE	InnateDB-All	FALSE	1	0	1	1	1	1	0	0	1	0	1	0	1	1	1	1	1	1	1	1	1	0	1	1	1
CPI-SS085EE60B1	TGFB1_TGFBR3	simple:P01137	simple:Q03167	TGFB1	TGFBR3	TRUE	FALSE	TRUE	curated	FALSE	1	1	1	1	1	1	1	1	1	1	1	1	1	1	1	1	0	1	1	1	1	1	1	1	1
CPI-SS0FB37E079	INHA_TGFBR3	simple:P05111	simple:Q03167	INHA	TGFBR3	TRUE	FALSE	TRUE	I2D	FALSE	1	1	1	1	1	1	0	1	1	1	1	1	1	1	1	1	1	1	1	1	1	1	1	1	1
CPI-SS0D46E2B45	TGFB3_TGFBR3	simple:P10600	simple:Q03167	TGFB3	TGFBR3	TRUE	FALSE	TRUE	curated	FALSE	1	1	1	1	1	1	1	1	1	1	1	1	1	1	1	1	1	1	1	1	1	1	1	1	1
CPI-SS0178F5C45	TGFB2_TGFBR3	simple:P61812	simple:Q03167	TGFB2	TGFBR3	TRUE	FALSE	TRUE	curated	FALSE	1	1	1	1	1	1	1	1	1	1	1	1	1	1	1	1	1	1	1	1	1	1	1	1	1
CPI-SC0C6B54D7A	THY1_aXb2 complex	simple:P04216	complex:aXb2 complex	THY1		FALSE	FALSE	FALSE	curated	TRUE	1	1	1	1	1	1	1	1	1	1	1	1	1	1	1	1	1	1	1	1	1	1	1	1	1
CPI-SC03446A95E	FCER2_aXb2 complex	simple:P06734	complex:aXb2 complex	FCER2		TRUE	TRUE	FALSE	curated	TRUE	1	1	1	1	1	1	1	1	1	1	1	1	1	1	1	1	1	1	1	1	1	1	1	1	1
CPI-SC0A9458008	ICAM1_aXb2 complex	simple:P05362	complex:aXb2 complex	ICAM1		FALSE	TRUE	FALSE	curated	TRUE	1	1	1	1	1	1	1	1	1	1	1	1	1	1	1	1	1	1	1	1	1	1	1	1	1
CPI-SS000568A0E	FCER2_CR2	simple:P06734	simple:P20023	FCER2	CR2	TRUE	TRUE	TRUE	curated	FALSE	1	1	1	1	1	1	1	1	1	1	1	1	1	1	1	1	1	1	1	1	1	1	1	1	1
CPI-SC04AED00CE	TNC_aVb6 complex	simple:P24821	complex:aVb6 complex	TNC		TRUE	FALSE	FALSE	curated	TRUE	1	1	1	1	1	1	1	1	1	1	1	1	1	1	1	1	1	1	1	1	1	1	1	1	1
CPI-SC0E60FEE99	TGFB1_aVb6 complex	simple:P01137	complex:aVb6 complex	TGFB1		TRUE	FALSE	FALSE	curated	TRUE	1	1	1	1	1	1	1	1	1	1	1	1	1	1	1	1	1	1	1	1	1	1	1	1	1
CPI-SS0ACD487F0	L1CAM_L1CAM	simple:P32004	simple:P32004	L1CAM	L1CAM	FALSE	FALSE	FALSE	curated	FALSE	1	1	1	1	1	1	0	1	1	1	1	1	1	1	1	1	1	1	1	1	1	1	1	1	1
CPI-SC019DBDA78	VCAM1_aDb2 complex	simple:P19320	complex:aDb2 complex	VCAM1		FALSE	FALSE	FALSE	curated	TRUE	1	1	1	1	1	1	1	1	1	1	1	1	1	1	1	1	1	1	1	1	1	1	1	1	1
CPI-SS087B53ABF	JAM2_JAM3	simple:P57087	simple:Q9BX67	JAM2	JAM3	TRUE	FALSE	FALSE	curated	FALSE	1	1	1	1	1	1	1	1	1	1	0	0	0	1	0	0	1	1	1	0	0	0	0	1	0
CPI-SS0F9D53834	JAM3_JAM3	simple:Q9BX67	simple:Q9BX67	JAM3	JAM3	TRUE	FALSE	FALSE	curated	FALSE	0	0	1	1	0	0	1	1	1	1	1	1	1	1	1	1	1	1	1	1	0	1	1	1	1
CPI-SS055E061C9	LAMP1_FAM3C	simple:P11279	simple:Q92520	LAMP1	FAM3C	TRUE	TRUE	FALSE	InnateDB-All	FALSE	1	0	1	1	0	1	0	1	1	0	1	1	1	1	1	1	1	1	1	1	1	1	1	1	1
CPI-SS02904BE32	GLRA2_FAM3C	simple:P23416	simple:Q92520	GLRA2	FAM3C	TRUE	TRUE	FALSE	InnateDB-All	FALSE	1	1	1	1	1	1	0	1	1	0	1	1	1	1	1	1	1	1	1	1	1	1	1	1	1
CPI-SS033CB0BB2	CXADR_FAM3C	simple:P78310	simple:Q92520	CXADR	FAM3C	TRUE	TRUE	FALSE	IMEx,IntAct	FALSE	1	1	1	1	1	1	1	1	1	1	1	1	1	1	1	1	1	1	1	1	1	1	1	1	1
CPI-SS0E2431C09	PDCD1_FAM3C	simple:Q15116	simple:Q92520	PDCD1	FAM3C	TRUE	TRUE	FALSE	InnateDB-All	FALSE	1	1	1	1	1	1	1	1	1	1	1	1	1	1	1	1	1	1	1	1	1	1	1	1	1
CPI-SS016EE0084	PDCD1_CD274	simple:Q15116	simple:Q9NZQ7	PDCD1	CD274	FALSE	TRUE	TRUE	curated	FALSE	1	1	1	1	1	1	1	1	1	1	1	1	1	1	1	1	1	1	1	1	1	1	1	1	1
CPI-SS08F13AD5C	CD80_CD274	simple:P33681	simple:Q9NZQ7	CD80	CD274	FALSE	TRUE	TRUE	curated	FALSE	1	1	1	1	1	1	1	1	1	1	1	1	1	1	1	1	1	1	1	1	1	1	1	1	1
CPI-SS0F5B6B186	PDCD1_PDCD1LG2	simple:Q15116	simple:Q9BQ51	PDCD1	PDCD1LG2	TRUE	TRUE	TRUE	curated	FALSE	1	1	1	1	1	1	1	1	1	1	1	1	1	1	1	1	1	1	1	1	1	1	1	1	1
CPI-CS08CC8F9D3	ACVR1_BMPR2_BMP7	complex:ACVR1_BMPR2	simple:P18075		BMP7	TRUE	TRUE	FALSE	curated	FALSE	1	1	1	1	1	1	1	1	1	1	1	1	1	1	1	1	1	1	1	1	1	1	1	1	1
CPI-CS046B3C139	ACVR_1A2A receptor_BMP7	complex:ACVR_1A2A receptor	simple:P18075		BMP7	TRUE	TRUE	FALSE	curated	FALSE	1	1	1	1	1	1	1	1	1	1	1	1	1	1	1	1	1	1	1	1	1	1	1	1	1
CPI-CS0288D901D	ACVR_1A2B receptor_BMP7	complex:ACVR_1A2B receptor	simple:P18075		BMP7	TRUE	TRUE	FALSE	curated	FALSE	1	1	1	1	1	1	1	1	1	1	1	1	1	1	1	1	1	1	1	1	1	1	1	1	1
CPI-CS05EAF93CC	BMPR1A_BMPR2_BMP7	complex:BMPR1A_BMPR2	simple:P18075		BMP7	TRUE	TRUE	FALSE	curated	FALSE	1	1	1	1	1	1	1	1	1	1	1	1	1	1	1	1	1	1	1	1	1	1	1	1	1
CPI-CS08109C435	BMPR1B_BMPR2_BMP7	complex:BMPR1B_BMPR2	simple:P18075		BMP7	TRUE	TRUE	FALSE	curated	FALSE	1	1	1	1	1	1	1	1	1	1	1	1	1	1	1	1	1	1	1	1	1	1	1	1	1
CPI-CS0D35E69F6	BMR1A_ACR2A_BMP7	complex:BMR1A_ACR2A	simple:P18075		BMP7	TRUE	TRUE	FALSE	curated	FALSE	1	1	1	1	1	1	1	1	1	1	1	1	1	1	1	1	1	1	1	1	1	1	1	1	1
CPI-CS0C99F8D96	BMR1A_AVR2B_BMP7	complex:BMR1A_AVR2B	simple:P18075		BMP7	TRUE	TRUE	FALSE	curated	FALSE	1	1	1	1	1	1	1	1	1	1	1	1	1	1	1	1	1	1	1	1	1	1	1	1	1
CPI-CS0DF85303A	BMR1B_AVR2A_BMP7	complex:BMR1B_AVR2A	simple:P18075		BMP7	TRUE	TRUE	FALSE	curated	FALSE	1	1	1	1	1	1	1	1	1	1	1	1	1	1	1	1	1	1	1	1	1	1	1	1	1
CPI-CS08A853007	BMR1B_AVR2B_BMP7	complex:BMR1B_AVR2B	simple:P18075		BMP7	TRUE	TRUE	FALSE	curated	FALSE	1	1	1	1	1	1	1	1	1	1	1	1	1	1	1	1	1	1	1	1	1	1	1	1	1
CPI-CS0E1BF543E	ACVR1_BMPR2_BMP5	complex:ACVR1_BMPR2	simple:P22003		BMP5	TRUE	TRUE	FALSE	curated	FALSE	1	1	1	1	1	1	1	1	1	1	1	1	1	1	1	1	1	1	1	1	1	1	1	1	1
CPI-CS0EC80CA59	ACVR_1A2A receptor_BMP5	complex:ACVR_1A2A receptor	simple:P22003		BMP5	TRUE	TRUE	FALSE	curated	FALSE	1	1	1	1	1	1	1	1	1	1	1	1	1	1	1	1	1	1	1	1	1	1	1	1	1
CPI-CS0FCC00896	ACVR_1A2B receptor_BMP5	complex:ACVR_1A2B receptor	simple:P22003		BMP5	TRUE	TRUE	FALSE	curated	FALSE	1	1	1	1	1	1	1	1	1	1	1	1	1	1	1	1	1	1	1	1	1	1	1	1	1
CPI-CS046BCFC6F	BMPR1A_BMPR2_BMP5	complex:BMPR1A_BMPR2	simple:P22003		BMP5	TRUE	TRUE	FALSE	curated	FALSE	1	1	1	1	1	1	1	1	1	1	1	1	1	1	1	1	1	1	1	1	1	1	1	1	1
CPI-CS02C93975C	BMPR1B_BMPR2_BMP5	complex:BMPR1B_BMPR2	simple:P22003		BMP5	TRUE	TRUE	FALSE	curated	FALSE	1	1	1	1	1	1	1	1	1	1	1	1	1	1	1	1	1	1	1	1	1	1	1	1	1
CPI-CS047EE9E03	BMR1A_ACR2A_BMP5	complex:BMR1A_ACR2A	simple:P22003		BMP5	TRUE	TRUE	FALSE	curated	FALSE	1	1	1	1	1	1	1	1	1	1	1	1	1	1	1	1	1	1	1	1	1	1	1	1	1
CPI-CS0CA393CC5	BMR1A_AVR2B_BMP5	complex:BMR1A_AVR2B	simple:P22003		BMP5	TRUE	TRUE	FALSE	curated	FALSE	1	1	1	1	1	1	1	1	1	1	1	1	1	1	1	1	1	1	1	1	1	1	1	1	1
CPI-CS01A4D7E2F	BMR1B_AVR2A_BMP5	complex:BMR1B_AVR2A	simple:P22003		BMP5	TRUE	TRUE	FALSE	curated	FALSE	1	1	1	1	1	1	1	1	1	1	1	1	1	1	1	1	1	1	1	1	1	1	1	1	1
CPI-CS0BEC40E19	BMR1B_AVR2B_BMP5	complex:BMR1B_AVR2B	simple:P22003		BMP5	TRUE	TRUE	FALSE	curated	FALSE	1	1	1	1	1	1	1	1	1	1	1	1	1	1	1	1	1	1	1	1	1	1	1	1	1
CPI-CS0C16967C6	ACVR1_BMPR2_BMP6	complex:ACVR1_BMPR2	simple:P22004		BMP6	TRUE	TRUE	FALSE	curated	FALSE	1	1	1	1	1	1	1	1	1	1	1	1	1	1	1	1	1	1	1	1	1	1	1	1	1
CPI-CS0FFBA02F8	ACVR_1A2A receptor_BMP6	complex:ACVR_1A2A receptor	simple:P22004		BMP6	TRUE	TRUE	FALSE	curated	FALSE	1	1	1	1	1	1	1	1	1	1	1	1	1	1	1	1	1	1	1	1	1	1	1	1	1
CPI-CS02AEFFE28	ACVR_1A2B receptor_BMP6	complex:ACVR_1A2B receptor	simple:P22004		BMP6	TRUE	TRUE	FALSE	curated	FALSE	1	1	1	1	1	1	1	1	1	1	1	1	1	1	1	1	1	1	1	1	1	1	1	1	1
CPI-CS0F6CFB979	BMPR1A_BMPR2_BMP6	complex:BMPR1A_BMPR2	simple:P22004		BMP6	TRUE	TRUE	FALSE	curated	FALSE	1	1	1	1	1	1	1	1	1	1	1	1	1	1	1	1	1	1	1	1	1	1	1	1	1
CPI-CS0EF793D6A	BMPR1B_BMPR2_BMP6	complex:BMPR1B_BMPR2	simple:P22004		BMP6	TRUE	TRUE	FALSE	curated	FALSE	1	1	1	1	1	1	1	1	1	1	1	1	1	1	1	1	1	1	1	1	1	1	1	1	1
CPI-CS0247DA882	BMR1A_ACR2A_BMP6	complex:BMR1A_ACR2A	simple:P22004		BMP6	TRUE	TRUE	FALSE	curated	FALSE	1	1	1	1	1	1	1	1	1	1	1	1	1	1	1	1	1	1	1	1	1	1	1	1	1
CPI-CS076E1A639	BMR1A_AVR2B_BMP6	complex:BMR1A_AVR2B	simple:P22004		BMP6	TRUE	TRUE	FALSE	curated	FALSE	1	1	1	1	1	1	1	1	1	1	1	1	1	1	1	1	1	1	1	1	1	1	1	1	1
CPI-CS0921BB754	BMR1B_AVR2A_BMP6	complex:BMR1B_AVR2A	simple:P22004		BMP6	TRUE	TRUE	FALSE	curated	FALSE	1	1	1	1	1	1	1	1	1	1	1	1	1	1	1	1	1	1	1	1	1	1	1	1	1
CPI-CS0C0D60519	BMR1B_AVR2B_BMP6	complex:BMR1B_AVR2B	simple:P22004		BMP6	TRUE	TRUE	FALSE	curated	FALSE	1	1	1	1	1	1	1	1	1	1	1	1	1	1	1	1	1	1	1	1	1	1	1	1	1
CPI-CC045C36F28	ACVR_1A2A receptor_Activin ligand ab	complex:ACVR_1A2A receptor	complex:Activin ligand ab			TRUE	TRUE	FALSE	curated	FALSE	1	1	1	1	1	1	1	1	1	1	1	1	1	1	1	1	1	1	1	1	1	1	1	1	1
CPI-CC09863F59B	ACVR_1A2B receptor_Activin ligand ab	complex:ACVR_1A2B receptor	complex:Activin ligand ab			TRUE	TRUE	FALSE	curated	FALSE	1	1	1	1	1	1	1	1	1	1	1	1	1	1	1	1	1	1	1	1	1	1	1	1	1
CPI-CC0104F2A96	ACVR_1B2A receptor_Activin ligand ab	complex:ACVR_1B2A receptor	complex:Activin ligand ab			TRUE	TRUE	FALSE	curated	FALSE	1	1	1	1	1	1	1	1	1	1	1	1	1	1	1	1	1	1	1	1	1	1	1	1	1
CPI-CC072007F09	ACVR_1B2B receptor_Activin ligand ab	complex:ACVR_1B2B receptor	complex:Activin ligand ab			TRUE	TRUE	FALSE	curated	FALSE	1	1	1	1	1	1	1	1	1	1	1	1	1	1	1	1	1	1	1	1	1	1	1	1	1
CPI-CC0947744F4	ACVR_1C2A receptor_Activin ligand ab	complex:ACVR_1C2A receptor	complex:Activin ligand ab			TRUE	TRUE	FALSE	curated	FALSE	1	1	1	1	1	1	1	1	1	1	1	1	1	1	1	1	1	1	1	1	1	1	1	1	1
CPI-CC0B6E6E341	ACVR_1C2B receptor_Activin ligand ab	complex:ACVR_1C2B receptor	complex:Activin ligand ab			TRUE	TRUE	FALSE	curated	FALSE	1	1	1	1	1	1	1	1	1	1	1	1	1	1	1	1	1	1	1	1	1	1	1	1	1
CPI-CS091BF99D0	ACVR_1A2A receptor_INHBA	complex:ACVR_1A2A receptor	simple:P08476		INHBA	TRUE	TRUE	FALSE	curated	FALSE	1	1	1	1	1	1	0	1	1	1	1	1	1	1	1	1	1	1	1	1	1	0	1	1	1
CPI-CS04DD927C9	ACVR_1A2B receptor_INHBA	complex:ACVR_1A2B receptor	simple:P08476		INHBA	TRUE	TRUE	FALSE	curated	FALSE	1	1	1	1	1	1	0	1	1	1	1	1	1	1	1	1	1	1	1	1	1	1	1	1	1
CPI-CS0533A30DC	ACVR_1B2A receptor_INHBA	complex:ACVR_1B2A receptor	simple:P08476		INHBA	TRUE	TRUE	FALSE	curated	FALSE	1	1	1	1	1	1	0	1	1	1	1	1	1	1	1	1	1	1	1	1	1	1	1	1	1
CPI-CS0C159B54D	ACVR_1B2B receptor_INHBA	complex:ACVR_1B2B receptor	simple:P08476		INHBA	TRUE	TRUE	FALSE	curated	FALSE	1	1	1	1	1	1	0	1	1	1	1	1	1	1	1	1	1	1	1	1	1	1	1	1	1
CPI-CS0924060DB	ACVR_1C2A receptor_INHBA	complex:ACVR_1C2A receptor	simple:P08476		INHBA	TRUE	TRUE	FALSE	curated	FALSE	1	1	1	1	1	1	1	1	1	1	1	0	1	1	1	1	1	1	1	1	1	1	1	1	1
CPI-CS0B79F5D68	ACVR_1C2B receptor_INHBA	complex:ACVR_1C2B receptor	simple:P08476		INHBA	TRUE	TRUE	FALSE	curated	FALSE	1	1	1	1	1	1	1	1	1	1	1	1	1	1	1	1	1	1	1	1	1	1	1	1	1
CPI-CS073233FCC	ACVR_1A2A receptor_INHBB	complex:ACVR_1A2A receptor	simple:P09529		INHBB	TRUE	TRUE	FALSE	curated	FALSE	1	1	1	1	1	1	1	1	1	1	1	1	1	1	1	1	1	1	1	1	1	1	1	1	1
CPI-CS048465560	ACVR_1A2B receptor_INHBB	complex:ACVR_1A2B receptor	simple:P09529		INHBB	TRUE	TRUE	FALSE	curated	FALSE	1	1	1	1	1	1	1	1	1	1	1	1	1	1	1	1	1	1	1	1	1	1	1	1	1
CPI-CS02899BF8B	ACVR_1B2A receptor_INHBB	complex:ACVR_1B2A receptor	simple:P09529		INHBB	TRUE	TRUE	FALSE	curated	FALSE	1	1	1	1	1	1	1	1	1	1	1	1	1	1	1	1	1	1	1	1	1	1	1	1	1
CPI-CS085EF890A	ACVR_1B2B receptor_INHBB	complex:ACVR_1B2B receptor	simple:P09529		INHBB	TRUE	TRUE	FALSE	curated	FALSE	1	1	1	1	1	1	1	1	1	1	1	1	1	1	1	1	1	1	1	1	1	1	1	1	1
CPI-CS007ADC2D1	ACVR_1C2A receptor_INHBB	complex:ACVR_1C2A receptor	simple:P09529		INHBB	TRUE	TRUE	FALSE	curated	FALSE	1	1	1	1	1	1	1	1	1	1	1	1	1	1	1	1	1	1	1	1	1	1	1	1	1
CPI-CS0A5400A6A	ACVR_1C2B receptor_INHBB	complex:ACVR_1C2B receptor	simple:P09529		INHBB	TRUE	TRUE	FALSE	curated	FALSE	1	1	1	1	1	1	1	1	1	1	1	1	1	1	1	1	1	1	1	1	1	1	1	1	1
CPI-CS0E4E75E3B	BMPR1A_BMPR2_BMP2	complex:BMPR1A_BMPR2	simple:P12643		BMP2	TRUE	TRUE	FALSE	curated	FALSE	1	1	1	1	1	1	1	1	1	1	1	1	1	1	1	1	1	1	1	1	1	1	1	1	1
CPI-CS028ACED72	BMPR1B_BMPR2_BMP2	complex:BMPR1B_BMPR2	simple:P12643		BMP2	TRUE	TRUE	FALSE	curated	FALSE	1	1	1	1	1	1	1	1	1	1	1	1	1	1	1	1	1	1	1	1	1	1	1	1	1
CPI-CS075442484	BMR1A_ACR2A_BMP2	complex:BMR1A_ACR2A	simple:P12643		BMP2	TRUE	TRUE	FALSE	curated	FALSE	1	1	1	1	1	1	1	1	1	1	1	1	1	1	1	1	1	1	1	1	1	1	1	1	1
CPI-CS0BE59B43E	BMR1A_AVR2B_BMP2	complex:BMR1A_AVR2B	simple:P12643		BMP2	TRUE	TRUE	FALSE	curated	FALSE	1	1	1	1	1	1	1	1	1	1	1	1	1	1	1	1	1	1	1	1	1	1	1	1	1
CPI-CS08A043594	BMR1B_AVR2A_BMP2	complex:BMR1B_AVR2A	simple:P12643		BMP2	TRUE	TRUE	FALSE	curated	FALSE	1	1	1	1	1	1	1	1	1	1	1	1	1	1	1	1	1	1	1	1	1	1	1	1	1
CPI-CS058910188	BMR1B_AVR2B_BMP2	complex:BMR1B_AVR2B	simple:P12643		BMP2	TRUE	TRUE	FALSE	curated	FALSE	1	1	1	1	1	1	1	1	1	1	1	1	1	1	1	1	1	1	1	1	1	1	1	1	1
CPI-CS0E54FF657	BMPR1A_BMPR2_BMP4	complex:BMPR1A_BMPR2	simple:P12644		BMP4	TRUE	TRUE	FALSE	curated	FALSE	1	1	1	1	1	1	1	1	1	1	1	1	1	1	1	1	1	1	1	1	1	1	1	1	1
CPI-CS0107C51C6	BMPR1B_BMPR2_BMP4	complex:BMPR1B_BMPR2	simple:P12644		BMP4	TRUE	TRUE	FALSE	curated	FALSE	1	1	1	1	1	1	1	1	1	1	1	1	1	1	1	1	1	1	1	1	1	1	1	1	1
CPI-CS012D15A88	BMR1A_ACR2A_BMP4	complex:BMR1A_ACR2A	simple:P12644		BMP4	TRUE	TRUE	FALSE	curated	FALSE	1	1	1	1	1	1	1	1	1	1	1	1	1	1	1	1	1	1	1	1	1	1	1	1	1
CPI-CS0BCDC40FC	BMR1A_AVR2B_BMP4	complex:BMR1A_AVR2B	simple:P12644		BMP4	TRUE	TRUE	FALSE	curated	FALSE	1	1	1	1	1	1	1	1	1	1	1	1	1	1	1	1	1	1	1	1	1	1	1	1	1
CPI-CS02957B1BF	BMR1B_AVR2A_BMP4	complex:BMR1B_AVR2A	simple:P12644		BMP4	TRUE	TRUE	FALSE	curated	FALSE	1	1	1	1	1	1	1	1	1	1	1	1	1	1	1	1	1	1	1	1	1	1	1	1	1
CPI-CS0E997FABD	BMR1B_AVR2B_BMP4	complex:BMR1B_AVR2B	simple:P12644		BMP4	TRUE	TRUE	FALSE	curated	FALSE	1	1	1	1	1	1	1	1	1	1	1	1	1	1	1	1	1	1	1	1	1	1	1	1	1
CPI-CS0B9A4CA4D	BMPR1A_BMPR2_GDF6	complex:BMPR1A_BMPR2	simple:Q6KF10		GDF6	TRUE	TRUE	FALSE	curated	FALSE	1	1	1	1	1	1	1	1	1	1	1	1	1	1	1	1	1	1	1	1	1	1	1	1	1
CPI-CS0C623F17A	BMPR1B_BMPR2_GDF6	complex:BMPR1B_BMPR2	simple:Q6KF10		GDF6	TRUE	TRUE	FALSE	curated	FALSE	1	1	1	1	1	1	1	1	1	1	1	1	1	1	1	1	1	1	1	1	1	1	1	1	1
CPI-CS04C402DFB	BMR1A_ACR2A_GDF6	complex:BMR1A_ACR2A	simple:Q6KF10		GDF6	TRUE	TRUE	FALSE	curated	FALSE	1	1	1	1	1	1	1	1	1	1	1	1	1	1	1	1	1	1	1	1	1	1	1	1	1
CPI-CS0546460D1	BMR1A_AVR2B_GDF6	complex:BMR1A_AVR2B	simple:Q6KF10		GDF6	TRUE	TRUE	FALSE	curated	FALSE	1	1	1	1	1	1	1	1	1	1	1	1	1	1	1	1	1	1	1	1	1	1	1	1	1
CPI-CS0D9226707	BMR1B_AVR2A_GDF6	complex:BMR1B_AVR2A	simple:Q6KF10		GDF6	TRUE	TRUE	FALSE	curated	FALSE	1	1	1	1	1	1	1	1	1	1	1	1	1	1	1	1	1	1	1	1	1	1	1	1	1
CPI-CS027F8BD7E	BMR1B_AVR2B_GDF6	complex:BMR1B_AVR2B	simple:Q6KF10		GDF6	TRUE	TRUE	FALSE	curated	FALSE	1	1	1	1	1	1	1	1	1	1	1	1	1	1	1	1	1	1	1	1	1	1	1	1	1
CPI-CS0CFA0E4C5	BMPR1A_BMPR2_GDF7	complex:BMPR1A_BMPR2	simple:Q7Z4P5		GDF7	TRUE	TRUE	FALSE	curated	FALSE	1	1	1	1	1	1	1	1	1	1	1	1	1	1	1	1	1	1	1	1	1	1	1	1	1
CPI-CS027D7A724	BMPR1B_BMPR2_GDF7	complex:BMPR1B_BMPR2	simple:Q7Z4P5		GDF7	TRUE	TRUE	FALSE	curated	FALSE	1	1	1	1	1	1	1	1	1	1	1	1	1	1	1	1	1	1	1	1	1	1	1	1	1
CPI-CS05789C9A0	BMR1A_ACR2A_GDF7	complex:BMR1A_ACR2A	simple:Q7Z4P5		GDF7	TRUE	TRUE	FALSE	curated	FALSE	1	1	1	1	1	1	1	1	1	1	1	1	1	1	1	1	1	1	1	1	1	1	1	1	1
CPI-CS0E5078EDE	BMR1A_AVR2B_GDF7	complex:BMR1A_AVR2B	simple:Q7Z4P5		GDF7	TRUE	TRUE	FALSE	curated	FALSE	1	1	1	1	1	1	1	1	1	1	1	1	1	1	1	1	1	1	1	1	1	1	1	1	1
CPI-CS0BDA0D08C	BMR1B_AVR2A_GDF7	complex:BMR1B_AVR2A	simple:Q7Z4P5		GDF7	TRUE	TRUE	FALSE	curated	FALSE	1	1	1	1	1	1	1	1	1	1	1	1	1	1	1	1	1	1	1	1	1	1	1	1	1
CPI-CS055E15573	BMR1B_AVR2B_GDF7	complex:BMR1B_AVR2B	simple:Q7Z4P5		GDF7	TRUE	TRUE	FALSE	curated	FALSE	1	1	1	1	1	1	1	1	1	1	1	1	1	1	1	1	1	1	1	1	1	1	1	1	1
CPI-CS0569B9B91	BMPR1B_BMPR2_BMPR1A	complex:BMPR1B_BMPR2	simple:P36894		BMPR1A	FALSE	TRUE	TRUE	curated	FALSE	1	1	1	1	1	1	0	0	1	0	0	0	0	0	0	1	1	1	1	1	1	1	1	1	1
CPI-CS09F35DDEB	ACVR_1B2A receptor_MSTN	complex:ACVR_1B2A receptor	simple:O14793		MSTN	TRUE	TRUE	FALSE	curated	FALSE	1	1	1	1	1	1	1	1	1	1	1	1	1	1	1	1	1	1	1	1	1	1	1	1	1
CPI-CS0AED3F8E8	ACVR_1B2B receptor_MSTN	complex:ACVR_1B2B receptor	simple:O14793		MSTN	TRUE	TRUE	FALSE	curated	FALSE	1	1	1	1	1	1	1	1	1	1	1	1	1	1	1	1	1	1	1	1	1	1	1	1	1
CPI-CS0C8F1E01F	ACVR_1B2A receptor_BMP3	complex:ACVR_1B2A receptor	simple:P12645		BMP3	TRUE	TRUE	FALSE	curated	FALSE	1	1	1	1	1	1	1	1	1	1	1	1	1	1	1	1	1	1	1	1	1	1	1	1	1
CPI-CS06C0EEFCB	ACVR_1B2B receptor_GDF10	complex:ACVR_1B2B receptor	simple:P55107		GDF10	TRUE	TRUE	FALSE	curated	FALSE	1	1	1	1	1	1	1	1	1	1	1	1	1	1	1	1	1	1	1	1	1	1	1	1	1
CPI-CS0A66DB1CA	CD8 receptor_LCK	complex:CD8 receptor	simple:P06239		LCK	FALSE	TRUE	FALSE	curated	FALSE	1	1	1	1	1	1	1	1	1	1	1	1	1	1	1	1	1	1	1	1	1	1	1	1	1
CPI-CS0B0B35928	CNTF-1R_CNTF	complex:CNTF-1R	simple:P26441		CNTF	TRUE	TRUE	FALSE	curated	FALSE	1	1	1	1	1	1	1	1	1	1	1	1	1	1	1	1	1	1	1	1	1	1	1	1	1
CPI-SS0D795AC00	EGFR_CNTF	simple:P00533	simple:P26441	EGFR	CNTF	TRUE	TRUE	FALSE	InnateDB-All	FALSE	1	1	1	1	1	1	1	1	1	1	1	1	1	1	1	1	1	1	1	1	1	1	1	1	1
CPI-CS0EB5F7B6F	CNTF-1R_CLCF1	complex:CNTF-1R	simple:Q9UBD9		CLCF1	TRUE	TRUE	FALSE	curated	FALSE	1	1	1	1	1	1	1	1	1	1	1	1	1	1	1	1	1	1	1	1	1	1	1	1	1
CPI-SS0B02DE712	EGFR_NRG1	simple:P00533	simple:Q02297	EGFR	NRG1	TRUE	TRUE	TRUE	I2D,IMEx,InnateDB-All,IntAct	FALSE	1	1	1	1	1	1	1	1	1	1	1	0	1	1	1	1	1	1	1	1	1	1	1	1	1
CPI-SS09375CA29	ADGRL1_NRG1	simple:O94910	simple:Q02297	ADGRL1	NRG1	TRUE	TRUE	TRUE	InnateDB-All	FALSE	1	1	1	1	1	1	0	1	1	1	1	0	1	1	1	1	1	1	1	1	1	0	1	1	1
CPI-SS00A953C3A	EGF_NRG1	simple:P01133	simple:Q02297	EGF	NRG1	TRUE	FALSE	TRUE	I2D	FALSE	1	1	1	1	1	1	1	1	1	1	1	1	1	1	1	1	1	1	1	1	1	1	1	1	1
CPI-SS0F4D30D5A	EGFR_EGF	simple:P00533	simple:P01133	EGFR	EGF	TRUE	TRUE	FALSE	curated	FALSE	1	1	1	1	1	1	1	1	1	1	1	1	1	1	1	1	1	1	1	1	1	1	1	1	1
CPI-SS0E25CE362	EGFR_TGFA	simple:P00533	simple:P01135	EGFR	TGFA	TRUE	TRUE	FALSE	curated	FALSE	1	1	1	1	1	1	1	1	1	1	0	1	1	0	0	1	1	1	1	1	1	1	1	1	1
CPI-SS0055264F3	EGFR_TGFB1	simple:P00533	simple:P01137	EGFR	TGFB1	TRUE	TRUE	FALSE	IMEx,InnateDB-All,MINT	FALSE	1	1	1	1	1	1	1	1	1	1	1	1	1	0	1	1	1	1	1	1	1	1	1	1	1
CPI-SS00EDDD458	EGFR_MIF	simple:P00533	simple:P14174	EGFR	MIF	TRUE	TRUE	FALSE	IMEx,InnateDB-All	FALSE	1	1	1	1	1	1	1	1	1	1	1	0	1	1	1	1	1	1	1	1	1	1	1	1	1
CPI-SS0ABC5C1B8	CD74_MIF	simple:P04233	simple:P14174	CD74	MIF	TRUE	TRUE	FALSE	I2D,InnateDB-All	FALSE	1	1	1	1	1	1	1	1	1	1	1	1	1	1	1	1	1	1	1	1	1	1	1	1	1
CPI-SS0481D83A4	EGFR_AREG	simple:P00533	simple:P15514	EGFR	AREG	TRUE	TRUE	FALSE	curated	FALSE	1	1	1	1	1	1	1	1	1	1	1	1	1	1	1	1	1	1	1	1	1	1	1	1	1
CPI-SS0D4C221B8	ICAM1_AREG	simple:P05362	simple:P15514	ICAM1	AREG	TRUE	TRUE	FALSE	InnateDB-All	FALSE	1	1	1	1	1	1	1	1	1	1	1	1	1	1	1	1	1	1	1	1	1	1	1	1	1
CPI-SS08CA619FE	EGFR_GRN	simple:P00533	simple:P28799	EGFR	GRN	TRUE	TRUE	FALSE	InnateDB-All	FALSE	1	1	1	1	1	1	1	1	1	1	1	1	1	0	1	1	1	1	1	1	1	1	1	1	1
CPI-SS0DA033F03	TNFRSF1A_GRN	simple:P19438	simple:P28799	TNFRSF1A	GRN	TRUE	TRUE	FALSE	IMEx,InnateDB-All,MINT	FALSE	1	1	1	1	1	1	1	1	1	1	1	1	1	1	1	1	1	1	1	1	1	1	1	1	1
CPI-SS054D158CC	NTRK1_GRN	simple:P04629	simple:P28799	NTRK1	GRN	TRUE	TRUE	FALSE	InnateDB-All	FALSE	1	1	1	1	1	1	1	1	1	1	1	1	1	1	1	1	1	1	1	1	1	1	1	1	1
CPI-SS0C4E86714	TNFRSF1B_GRN	simple:P20333	simple:P28799	TNFRSF1B	GRN	TRUE	TRUE	FALSE	IMEx,InnateDB-All,MINT	FALSE	1	1	1	1	1	1	1	1	1	1	1	1	1	1	1	1	1	1	0	1	1	1	1	1	1
CPI-SS0A19E9C34	EGFR_BTC	simple:P00533	simple:P35070	EGFR	BTC	TRUE	TRUE	FALSE	curated	FALSE	1	1	1	1	1	1	1	1	1	1	1	1	1	1	1	1	1	1	1	1	1	1	1	1	1
CPI-SS088A0A760	EGFR_COPA	simple:P00533	simple:P53621	EGFR	COPA	TRUE	TRUE	FALSE	InnateDB-All	FALSE	1	1	1	1	1	1	1	1	1	1	0	0	0	0	0	1	1	1	1	1	1	1	1	1	1
CPI-SS0302E8E8F	CD74_COPA	simple:P04233	simple:P53621	CD74	COPA	TRUE	TRUE	FALSE	IMEx,IntAct	FALSE	1	1	1	1	1	1	1	1	1	1	1	1	1	1	1	1	1	1	1	1	1	1	1	1	1
CPI-SS0E6E8A727	NTRK1_COPA	simple:P04629	simple:P53621	NTRK1	COPA	TRUE	TRUE	FALSE	InnateDB-All	FALSE	1	1	1	1	1	1	1	1	1	1	1	1	1	1	1	1	1	1	1	1	1	1	1	1	1
CPI-SS0C10824C7	EGFR_HBEGF	simple:P00533	simple:Q99075	EGFR	HBEGF	TRUE	TRUE	TRUE	curated	FALSE	1	1	1	1	1	1	1	1	1	1	1	1	1	1	1	1	1	1	1	1	1	1	1	1	1
CPI-SS0632A027A	CD44_HBEGF	simple:P16070	simple:Q99075	CD44	HBEGF	TRUE	TRUE	TRUE	I2D,InnateDB-All	FALSE	1	1	1	1	1	1	1	1	1	1	1	1	1	1	1	1	1	1	1	1	1	1	1	1	1
CPI-SS03098AC28	ERBB4_HBEGF	simple:Q15303	simple:Q99075	ERBB4	HBEGF	TRUE	TRUE	TRUE	curated	FALSE	1	1	1	1	1	1	1	1	1	1	1	1	1	1	1	1	1	1	1	1	1	1	1	1	1
CPI-SS03C51D352	TNFRSF13B_TNFSF13B	simple:O14836	simple:Q9Y275	TNFRSF13B	TNFSF13B	TRUE	TRUE	FALSE	curated	FALSE	1	1	1	1	1	1	1	1	1	1	1	1	1	1	1	1	1	1	1	1	1	1	1	1	1
CPI-SS03133B4F2	TFRC_TNFSF13B	simple:P02786	simple:Q9Y275	TFRC	TNFSF13B	TRUE	TRUE	FALSE	IMEx,IntAct	FALSE	1	1	1	1	1	1	0	1	0	1	1	1	1	1	1	1	1	1	1	1	1	1	1	1	1
CPI-SS0F00D756A	CD40_TNFSF13B	simple:P25942	simple:Q9Y275	CD40	TNFSF13B	TRUE	TRUE	FALSE	I2D,InnateDB	FALSE	1	1	1	1	1	1	1	1	1	1	1	1	1	1	1	1	1	1	1	1	1	1	1	1	1
CPI-SS0E2863F09	TNFRSF17_TNFSF13B	simple:Q02223	simple:Q9Y275	TNFRSF17	TNFSF13B	TRUE	TRUE	FALSE	curated	FALSE	1	1	1	1	1	1	1	1	1	1	1	1	1	1	1	1	1	1	1	1	1	1	1	1	1
CPI-SS09648FAA9	TNFRSF13C_TNFSF13B	simple:Q96RJ3	simple:Q9Y275	TNFRSF13C	TNFSF13B	TRUE	TRUE	FALSE	guidetopharmacology.org	FALSE	1	1	1	1	1	1	1	1	1	1	1	1	1	1	1	1	1	1	1	1	1	1	1	1	1
CPI-SS09808DEAE	CD74_APP	simple:P04233	simple:P05067	CD74	APP	FALSE	TRUE	FALSE	curated	FALSE	1	1	1	1	1	1	1	1	1	1	1	1	1	1	1	1	1	1	1	1	1	1	1	1	1
CPI-SS0E9A581F8	ICAM1_ITGAL	simple:P05362	simple:P20701	ICAM1	ITGAL	FALSE	TRUE	TRUE	curated	FALSE	1	1	1	1	1	1	1	1	1	1	1	1	1	1	1	1	1	1	1	1	1	1	1	1	1
CPI-SC0F4AC5AA2	ICAM1_aLb2 complex	simple:P05362	complex:aLb2 complex	ICAM1		FALSE	TRUE	FALSE	curated	TRUE	1	1	1	1	1	1	1	1	1	1	1	1	1	1	1	1	1	1	1	1	1	1	1	1	1
CPI-SC063BC3DDE	ICAM2_aLb2 complex	simple:P13598	complex:aLb2 complex	ICAM2		FALSE	FALSE	FALSE	curated	TRUE	1	1	1	1	1	1	1	1	1	1	1	1	1	1	1	1	1	1	1	1	1	1	1	1	1
CPI-SC092659F65	ICAM4_aLb2 complex	simple:Q14773	complex:aLb2 complex	ICAM4		TRUE	FALSE	FALSE	curated	TRUE	1	1	1	1	1	1	1	1	1	1	1	1	1	1	1	1	1	1	1	1	1	1	1	1	1
CPI-SC08923F7F7	F11R_aLb2 complex	simple:Q9Y624	complex:aLb2 complex	F11R		FALSE	TRUE	FALSE	curated	TRUE	1	1	1	1	1	1	1	1	1	1	1	1	1	1	1	1	1	1	1	1	1	1	1	1	1
CPI-SS0A4F27388	TNFRSF1A_FASLG	simple:P19438	simple:P48023	TNFRSF1A	FASLG	TRUE	TRUE	FALSE	I2D,InnateDB-All	FALSE	1	1	1	1	1	1	1	1	1	1	1	1	1	1	1	1	1	1	1	1	1	1	1	1	1
CPI-SS0049FD74F	TNFRSF10B_FASLG	simple:O14763	simple:P48023	TNFRSF10B	FASLG	TRUE	TRUE	FALSE	I2D,InnateDB-All	FALSE	1	1	1	1	1	1	1	1	1	1	1	1	1	1	1	1	1	1	1	1	1	1	1	1	1
CPI-SS03A0C857B	FAS_FASLG	simple:P25445	simple:P48023	FAS	FASLG	TRUE	TRUE	FALSE	curated	FALSE	1	1	1	1	1	1	1	1	1	1	1	1	1	1	1	1	1	1	1	1	1	1	1	1	1
CPI-SS004A073E1	NTRK1_NTF3	simple:P04629	simple:P20783	NTRK1	NTF3	TRUE	TRUE	FALSE	curated	FALSE	1	1	1	1	1	1	1	1	1	1	1	1	1	1	1	1	1	1	1	1	1	1	1	1	1
CPI-SS0ADA587B4	NGFR_NTF3	simple:P08138	simple:P20783	NGFR	NTF3	TRUE	TRUE	FALSE	curated	FALSE	1	1	1	1	1	1	1	1	1	1	1	1	1	1	1	1	1	1	1	1	1	1	1	1	1
CPI-SS0B1AB068C	NTRK1_GPI	simple:P04629	simple:P06744	NTRK1	GPI	TRUE	TRUE	FALSE	InnateDB-All	FALSE	1	1	1	1	1	1	1	1	1	1	1	1	1	1	1	1	1	1	1	1	1	1	1	1	1
CPI-SS0391D4602	NTRK1_NAMPT	simple:P04629	simple:P43490	NTRK1	NAMPT	TRUE	TRUE	FALSE	InnateDB-All	FALSE	1	1	1	1	1	1	1	1	1	1	1	1	1	1	1	1	1	1	1	1	1	1	1	1	1
CPI-SS00A6D366F	ADORA2A_NAMPT	simple:P29274	simple:P43490	ADORA2A	NAMPT	TRUE	TRUE	FALSE	I2D,IMEx,InnateDB-All,MINT	FALSE	1	1	1	1	1	1	1	1	1	1	1	1	1	1	1	1	1	1	1	1	1	1	1	1	1
CPI-SS05D1A6BEF	NTRK1_AIMP1	simple:P04629	simple:Q12904	NTRK1	AIMP1	TRUE	TRUE	FALSE	InnateDB-All	FALSE	1	1	1	1	1	1	1	1	1	1	1	1	1	1	1	1	1	1	1	1	1	1	1	1	1
CPI-SS074CF011C	ERBB4_NRG4	simple:Q15303	simple:Q8WWG1	ERBB4	NRG4	TRUE	TRUE	FALSE	curated	FALSE	1	1	1	1	1	1	0	1	1	1	1	0	1	1	1	1	1	1	1	1	1	0	1	1	1
CPI-CS067298D94	FLT1 complex_VEGFA	complex:FLT1 complex	simple:P15692		VEGFA	TRUE	TRUE	FALSE	curated	FALSE	1	1	1	1	1	1	1	1	1	1	1	1	1	1	1	1	1	1	1	1	1	1	1	1	1
CPI-SS0DE0A486F	NRP1_VEGFA	simple:O14786	simple:P15692	NRP1	VEGFA	TRUE	TRUE	FALSE	curated	FALSE	1	1	1	1	1	1	0	0	1	0	1	1	0	1	0	1	0	0	1	0	1	1	1	1	1
CPI-SS0E00478B4	NRP2_VEGFA	simple:O60462	simple:P15692	NRP2	VEGFA	TRUE	TRUE	FALSE	curated	FALSE	1	1	1	1	1	1	0	0	1	0	1	1	0	1	1	1	1	0	1	1	1	1	0	1	1
CPI-CS073D36B1D	FLT1 complex_PGF	complex:FLT1 complex	simple:P49763		PGF	TRUE	TRUE	FALSE	curated	FALSE	1	1	1	1	1	1	1	1	1	1	1	1	1	1	1	1	1	1	1	1	1	1	1	1	1
CPI-SS0855C0353	NRP1_PGF	simple:O14786	simple:P49763	NRP1	PGF	TRUE	TRUE	FALSE	curated	FALSE	1	1	1	1	1	1	1	1	1	1	1	1	1	1	1	1	1	1	1	1	1	1	1	1	1
CPI-SS0D22A09AD	NRP2_PGF	simple:O60462	simple:P49763	NRP2	PGF	TRUE	TRUE	FALSE	curated	FALSE	1	1	1	1	1	1	1	1	1	1	1	1	1	1	1	1	1	1	1	1	1	1	1	1	1
CPI-SS0E61DB5DF	FLT1_PGF	simple:P17948	simple:P49763	FLT1	PGF	TRUE	TRUE	FALSE	curated	FALSE	1	1	1	1	1	1	1	1	1	1	1	1	1	1	1	1	1	1	1	1	1	1	1	1	1
CPI-CS077F1340A	FLT1 complex_VEGFB	complex:FLT1 complex	simple:P49765		VEGFB	TRUE	TRUE	FALSE	curated	FALSE	1	1	1	1	1	1	1	1	1	1	1	1	1	1	1	1	1	1	1	1	1	1	1	1	1
CPI-SS033E6DE7E	NRP1_VEGFB	simple:O14786	simple:P49765	NRP1	VEGFB	TRUE	TRUE	FALSE	curated	FALSE	1	1	1	1	1	1	0	1	1	1	1	1	1	1	1	1	0	1	1	1	1	1	1	1	1
CPI-SS0947A8549	FLT1_VEGFB	simple:P17948	simple:P49765	FLT1	VEGFB	TRUE	TRUE	FALSE	curated	FALSE	1	1	1	1	1	1	1	1	1	1	1	1	1	1	1	1	1	1	1	1	1	1	1	1	1
CPI-SS098425155	ADRB2_VEGFB	simple:P07550	simple:P49765	ADRB2	VEGFB	TRUE	TRUE	FALSE	InnateDB-All	FALSE	1	1	1	1	1	1	1	1	1	1	1	1	1	1	1	1	1	1	1	1	1	1	1	1	1
CPI-SS08083B141	NRP1_SEMA3A	simple:O14786	simple:Q14563	NRP1	SEMA3A	TRUE	TRUE	FALSE	curated	FALSE	1	1	1	1	1	1	0	1	1	1	1	0	1	1	1	1	0	1	1	1	1	1	1	1	1
CPI-CS0E5D1ECCE	PlexinA1_complex3_SEMA3A	complex:PlexinA1_complex3	simple:Q14563		SEMA3A	TRUE	TRUE	FALSE	curated	FALSE	1	1	1	1	1	1	0	1	1	1	1	1	1	1	1	1	1	1	1	1	1	1	1	1	1
CPI-CS0D238C22B	PlexinA2_complex1_SEMA3A	complex:PlexinA2_complex1	simple:Q14563		SEMA3A	TRUE	TRUE	FALSE	curated	FALSE	1	1	1	1	1	1	0	1	1	1	1	0	1	1	1	1	1	1	1	1	1	1	1	1	1
CPI-CS0AA769F5B	PlexinA3_complex1_SEMA3A	complex:PlexinA3_complex1	simple:Q14563		SEMA3A	TRUE	TRUE	FALSE	curated	FALSE	1	1	1	1	1	1	1	1	1	1	1	1	1	1	1	1	1	1	1	1	1	1	1	1	1
CPI-CS0AB19226A	PlexinA4_complex1_SEMA3A	complex:PlexinA4_complex1	simple:Q14563		SEMA3A	TRUE	TRUE	FALSE	curated	FALSE	1	1	1	1	1	1	0	1	1	1	1	0	1	1	1	1	0	1	1	1	1	1	1	1	1
CPI-SS0F15C1AB3	NRP2_SEMA3F	simple:O60462	simple:Q13275	NRP2	SEMA3F	TRUE	TRUE	FALSE	curated	FALSE	1	1	1	1	1	1	1	1	1	1	1	1	1	1	1	1	1	1	1	1	1	1	1	1	1
CPI-SS0241A1F57	NRP2_SEMA3C	simple:O60462	simple:Q99985	NRP2	SEMA3C	TRUE	TRUE	FALSE	curated	FALSE	1	1	1	1	1	1	0	1	1	1	1	1	1	1	1	1	1	1	1	1	1	1	1	1	1
CPI-SS0268D47AD	CCL4_GPR152	simple:P13236	simple:Q8TDT2	CCL4	GPR152	TRUE	FALSE	TRUE	IMEx,IntAct	FALSE	1	1	1	1	1	1	1	1	1	1	1	1	1	1	1	1	1	1	1	1	1	1	1	1	1
CPI-SS016B111FE	IGF2_GPR152	simple:P01344	simple:Q8TDT2	IGF2	GPR152	TRUE	FALSE	TRUE	IMEx,IntAct	FALSE	1	1	1	1	1	1	1	1	1	1	1	1	1	1	1	1	1	1	1	1	1	1	1	1	1
CPI-SS0714977CA	BDNF_GPR152	simple:P23560	simple:Q8TDT2	BDNF	GPR152	TRUE	FALSE	TRUE	IMEx,IntAct	FALSE	1	1	1	1	1	1	1	1	1	1	1	1	1	1	1	1	1	1	1	1	1	1	1	1	1
CPI-SS03FA58286	TNF_VSIR	simple:P01375	simple:Q9H7M9	TNF	VSIR	TRUE	FALSE	TRUE	IMEx,IntAct	FALSE	1	1	1	1	1	1	1	1	1	1	1	1	1	1	1	1	1	1	1	1	1	1	1	1	1
CPI-SS00AD71822	CCK_CCKBR	simple:P06307	simple:P32239	CCK	CCKBR	TRUE	FALSE	TRUE	guidetopharmacology.org	FALSE	1	1	1	1	1	1	1	1	1	1	1	1	1	1	1	1	1	1	1	1	1	1	1	1	1
CPI-SS0D1D95883	CCL4_CCR5	simple:P13236	simple:P51681	CCL4	CCR5	TRUE	FALSE	TRUE	curated	FALSE	1	1	1	1	1	1	1	1	1	1	1	1	1	1	1	1	1	1	1	1	1	1	1	1	1
CPI-SS0C090A257	CCL3_CCR5	simple:P10147	simple:P51681	CCL3	CCR5	TRUE	FALSE	TRUE	curated	FALSE	1	1	1	1	1	1	1	1	1	1	1	1	1	1	1	1	1	1	1	1	1	1	1	1	1
CPI-SS0795802F6	CCL4_SLC7A1	simple:P13236	simple:P30825	CCL4	SLC7A1	TRUE	FALSE	TRUE	IMEx,IntAct	FALSE	1	1	1	1	1	1	1	1	1	1	1	1	1	1	1	1	1	1	1	1	1	1	1	1	1
CPI-SS03105D292	CSF1_SLC7A1	simple:P09603	simple:P30825	CSF1	SLC7A1	TRUE	FALSE	TRUE	I2D	FALSE	1	0	1	1	1	1	1	1	1	1	1	1	1	1	1	1	1	1	1	1	1	1	1	1	1
CPI-SS05BA6D9C3	CCL4_CNR2	simple:P13236	simple:P34972	CCL4	CNR2	TRUE	FALSE	TRUE	IMEx,IntAct	FALSE	1	1	1	1	1	1	1	1	1	1	1	1	1	1	1	1	1	1	1	1	1	1	1	1	1
CPI-SS008F83E02	CCL4_GPRC5D	simple:P13236	simple:Q9NZD1	CCL4	GPRC5D	TRUE	FALSE	TRUE	IMEx,IntAct	FALSE	1	1	1	1	1	1	1	1	1	1	1	1	1	1	1	1	1	1	1	1	1	1	1	1	1
CPI-SS0A3569604	IGF2_IDE	simple:P01344	simple:P14735	IGF2	IDE	TRUE	FALSE	TRUE	I2D,InnateDB-All	FALSE	1	1	1	1	1	1	1	1	1	1	1	1	1	1	1	1	1	1	1	1	1	1	1	1	1
CPI-SS076D8415B	CCL3_IDE	simple:P10147	simple:P14735	CCL3	IDE	TRUE	FALSE	TRUE	IMEx,InnateDB-All,MINT	FALSE	1	1	1	1	1	1	1	1	1	1	1	1	1	1	1	1	1	1	1	1	1	1	1	1	1
CPI-SS0579FA162	IGF2_IGF1R	simple:P01344	simple:P08069	IGF2	IGF1R	TRUE	FALSE	TRUE	curated	FALSE	1	1	1	1	1	1	1	1	1	1	1	1	1	1	1	1	1	1	1	1	1	1	1	1	1
CPI-SS0E41702C1	IGF1_IGF1R	simple:P05019	simple:P08069	IGF1	IGF1R	TRUE	FALSE	TRUE	curated	FALSE	1	1	1	1	1	1	1	1	1	1	1	1	1	1	1	1	1	1	1	1	1	1	1	1	1
CPI-SS042A6F835	IGF2_IGF2R	simple:P01344	simple:P11717	IGF2	IGF2R	TRUE	FALSE	TRUE	curated	FALSE	1	1	1	1	1	1	1	1	1	1	1	1	1	1	1	1	1	1	1	1	1	1	1	1	1
CPI-SS0BA601DC4	BDNF_NTRK2	simple:P23560	simple:Q16620	BDNF	NTRK2	TRUE	FALSE	TRUE	curated	FALSE	1	1	1	1	1	1	0	1	1	1	1	1	1	1	1	1	1	1	1	1	1	1	1	1	1
CPI-SS093E05DD4	NTF3_NTRK2	simple:P20783	simple:Q16620	NTF3	NTRK2	TRUE	FALSE	TRUE	curated	FALSE	1	1	1	1	1	1	1	1	1	1	1	1	1	1	1	1	1	1	1	1	1	1	1	1	1
CPI-SS088C1035B	NTF4_NTRK2	simple:P34130	simple:Q16620	NTF4	NTRK2	TRUE	FALSE	TRUE	I2D,IMEx,InnateDB-All,IntAct	FALSE	1	1	1	1	1	1	1	1	1	1	1	1	1	1	1	1	1	1	1	1	1	1	1	1	1
CPI-SS09A36B221	BDNF_SORT1	simple:P23560	simple:Q99523	BDNF	SORT1	TRUE	FALSE	TRUE	I2D,IMEx,InnateDB-All,IntAct	FALSE	1	1	1	1	1	1	0	1	1	1	1	1	1	1	1	1	1	1	1	1	1	1	1	1	1
CPI-SS07CCAD9BF	GRN_SORT1	simple:P28799	simple:Q99523	GRN	SORT1	TRUE	FALSE	TRUE	IMEx,InnateDB-All,MINT	FALSE	1	1	1	1	1	1	1	1	1	1	1	1	1	1	1	0	0	1	1	1	1	1	1	1	1
CPI-SS04F3A1E5C	COPA_SORT1	simple:P53621	simple:Q99523	COPA	SORT1	TRUE	FALSE	TRUE	IMEx,InnateDB-All,IntAct,MatrixDB	FALSE	1	1	1	1	1	0	0	1	1	1	1	0	1	1	1	1	1	1	1	1	1	0	1	1	1
CPI-SS03F0B666C	BDNF_F11R	simple:P23560	simple:Q9Y624	BDNF	F11R	TRUE	FALSE	TRUE	IMEx,InnateDB-All,IntAct	FALSE	1	1	1	1	1	1	1	1	0	1	1	1	1	1	1	1	1	1	1	1	1	1	1	1	1
CPI-SC0D089F0A9	IFNK_Type I IFNR	simple:Q9P0W0	complex:Type I IFNR	IFNK		TRUE	FALSE	TRUE	curated	FALSE	1	1	1	1	1	1	1	1	1	1	1	1	1	1	1	1	1	1	1	1	1	1	1	1	1
CPI-SS04465565A	PROK1_PROKR2	simple:P58294	simple:Q8NFJ6	PROK1	PROKR2	TRUE	FALSE	TRUE	guidetopharmacology.org	FALSE	1	1	1	1	1	1	1	1	1	1	1	1	1	1	1	1	1	1	1	1	1	1	1	1	1
CPI-SS02A0FF87F	FAM3C_CLEC2D	simple:Q92520	simple:Q9UHP7	FAM3C	CLEC2D	TRUE	FALSE	TRUE	IMEx,InnateDB-All,IntAct	FALSE	1	1	1	1	1	1	1	1	1	1	1	1	1	1	1	1	1	1	1	1	1	1	1	1	1
CPI-SS0471FCFF3	GAL_GPR151	simple:P22466	simple:Q8TDV0	GAL	GPR151	TRUE	FALSE	TRUE	I2D	FALSE	1	1	1	1	1	1	1	1	1	1	1	1	1	1	1	1	1	1	1	1	1	1	1	1	1
CPI-SS0F8EFEECF	TNF_DAG1	simple:P01375	simple:Q14118	TNF	DAG1	TRUE	FALSE	TRUE	InnateDB-All	FALSE	1	1	1	1	1	1	1	1	1	1	1	1	1	1	1	1	1	1	1	1	1	1	1	1	1
CPI-SS02EBC1BB0	TNF_NOTCH1	simple:P01375	simple:P46531	TNF	NOTCH1	TRUE	FALSE	TRUE	I2D	FALSE	1	1	1	1	1	1	1	1	1	1	1	1	1	1	1	1	1	1	1	1	1	1	1	1	1
CPI-SS04A5D6B6F	DLL1_NOTCH1	simple:O00548	simple:P46531	DLL1	NOTCH1	FALSE	FALSE	TRUE	curated	FALSE	1	1	1	1	1	1	1	1	1	1	1	1	1	1	1	1	1	1	1	1	1	1	1	1	1
CPI-SS0B81F1BF5	TNF_SEMA4C	simple:P01375	simple:Q9C0C4	TNF	SEMA4C	TRUE	FALSE	TRUE	InnateDB-All	FALSE	1	1	1	1	1	1	1	1	1	1	1	1	1	1	1	1	1	1	1	1	1	1	1	1	1
CPI-SS0AB21032D	PLXNB2_SEMA4C	simple:O15031	simple:Q9C0C4	PLXNB2	SEMA4C	FALSE	TRUE	TRUE	curated	FALSE	1	1	1	1	1	1	1	1	1	1	1	1	1	1	1	1	1	1	1	1	1	1	1	1	1
CPI-SS09C917D22	TNF_FLT4	simple:P01375	simple:P35916	TNF	FLT4	TRUE	FALSE	TRUE	InnateDB-All	FALSE	1	1	1	1	1	1	1	1	1	1	1	1	1	1	1	1	1	1	1	1	1	1	1	1	1
CPI-SS0D883FFF1	VEGFD_FLT4	simple:O43915	simple:P35916	VEGFD	FLT4	TRUE	FALSE	TRUE	curated	FALSE	1	1	1	1	1	1	1	1	1	1	1	1	1	1	1	1	1	1	1	1	1	1	1	1	1
CPI-SS04B4619D0	TNF_TNFRSF1A	simple:P01375	simple:P19438	TNF	TNFRSF1A	TRUE	FALSE	TRUE	curated	FALSE	1	1	1	1	1	1	1	1	1	1	1	1	1	1	1	1	1	1	1	1	1	1	1	1	1
CPI-SS084BE3E4B	LTA_TNFRSF1A	simple:P01374	simple:P19438	LTA	TNFRSF1A	TRUE	FALSE	TRUE	curated	FALSE	1	1	1	1	1	1	1	1	1	1	1	1	1	1	1	1	1	1	1	1	1	1	1	1	1
CPI-SS0F9B3B259	TNFSF13_TNFRSF1A	simple:O75888	simple:P19438	TNFSF13	TNFRSF1A	TRUE	FALSE	TRUE	I2D,InnateDB-All	FALSE	1	1	1	1	1	1	1	1	1	1	1	1	1	1	1	1	1	1	1	1	1	1	1	1	1
CPI-SS08B7D54A3	TNF_FAS	simple:P01375	simple:P25445	TNF	FAS	TRUE	FALSE	TRUE	InnateDB-All	FALSE	1	1	1	1	1	1	1	1	1	1	1	1	1	1	1	1	1	1	1	1	1	1	1	1	1
CPI-SS0A83A7E30	TNFSF13_FAS	simple:O75888	simple:P25445	TNFSF13	FAS	TRUE	FALSE	TRUE	I2D,InnateDB-All	FALSE	1	1	1	1	1	1	1	1	1	1	1	1	1	1	1	1	1	1	1	1	1	1	1	1	1
CPI-SS0E7D5974D	TNF_TNFRSF1B	simple:P01375	simple:P20333	TNF	TNFRSF1B	TRUE	FALSE	TRUE	curated	FALSE	1	1	1	1	1	1	1	1	1	1	1	1	1	1	1	1	1	1	1	1	1	1	1	1	1
CPI-SS07D9A48A2	LTA_TNFRSF1B	simple:P01374	simple:P20333	LTA	TNFRSF1B	TRUE	FALSE	TRUE	curated	FALSE	1	1	1	1	1	1	1	1	1	1	1	1	1	1	1	1	1	1	1	1	1	1	1	1	1
CPI-SS048A2311A	TNF_RIPK1	simple:P01375	simple:Q13546	TNF	RIPK1	TRUE	FALSE	TRUE	I2D,IMEx,InnateDB,InnateDB-All,IntAct,MINT	FALSE	1	1	1	1	1	1	1	1	1	1	1	1	1	1	1	1	1	1	1	1	1	1	1	1	1
CPI-SS0D5C54214	LTA_RIPK1	simple:P01374	simple:Q13546	LTA	RIPK1	TRUE	FALSE	TRUE	IMEx,InnateDB-All,MINT	FALSE	1	1	1	1	1	1	1	1	1	1	1	1	1	1	1	1	1	1	1	1	1	1	1	1	1
CPI-SS0DEDA3567	TNFSF10_RIPK1	simple:P50591	simple:Q13546	TNFSF10	RIPK1	TRUE	FALSE	TRUE	InnateDB-All	FALSE	1	1	1	1	1	1	1	1	1	1	1	1	1	1	1	1	1	1	1	1	1	1	1	1	1
CPI-SS0FBC9234C	TNF_PTPRS	simple:P01375	simple:Q13332	TNF	PTPRS	TRUE	FALSE	TRUE	InnateDB-All	FALSE	1	1	1	1	1	1	1	1	1	1	1	1	1	1	1	1	1	1	1	1	1	1	1	1	1
CPI-SS00F4DDF4B	PTN_PTPRS	simple:P21246	simple:Q13332	PTN	PTPRS	TRUE	FALSE	TRUE	I2D,IMEx,InnateDB-All,IntAct	FALSE	1	0	1	1	1	1	0	1	1	1	1	0	1	1	1	1	0	1	1	1	0	0	0	0	0
CPI-SS034B442CE	TNF_CELSR2	simple:P01375	simple:Q9HCU4	TNF	CELSR2	TRUE	FALSE	TRUE	InnateDB-All	FALSE	1	1	1	1	1	1	1	1	1	1	1	1	1	1	1	1	1	1	1	1	1	1	1	1	1
CPI-SS0EA96C304	CCK_CCKAR	simple:P06307	simple:P32238	CCK	CCKAR	TRUE	FALSE	TRUE	guidetopharmacology.org	FALSE	1	1	1	1	1	1	1	1	1	1	1	1	1	1	1	1	1	1	1	1	1	1	1	1	1
CPI-SS056BE1011	CCRL2_CCL19	simple:O00421	simple:Q99731	CCRL2	CCL19	TRUE	TRUE	FALSE	guidetopharmacology.org	FALSE	1	1	1	1	1	1	1	1	1	1	1	1	1	1	1	1	1	1	1	1	1	1	1	1	1
CPI-SS0DBA4D668	DPP4_CXCL12	simple:P27487	simple:P48061	DPP4	CXCL12	TRUE	TRUE	FALSE	curated	FALSE	1	1	1	1	1	1	1	1	1	1	1	1	1	1	1	1	1	1	1	1	1	1	1	1	1
CPI-SS07155793F	ACKR3_CXCL12	simple:P25106	simple:P48061	ACKR3	CXCL12	TRUE	TRUE	FALSE	guidetopharmacology.org	FALSE	1	1	1	1	1	1	1	1	1	1	1	1	1	1	1	1	1	1	1	1	1	1	1	1	1
CPI-SS0DCA69916	TNFRSF13B_TNFSF13	simple:O14836	simple:O75888	TNFRSF13B	TNFSF13	TRUE	TRUE	FALSE	curated	FALSE	1	1	1	1	1	1	1	1	1	1	1	1	1	1	1	1	1	1	1	1	1	1	1	1	1
CPI-SS0AA47D179	TNFRSF13B_CD70	simple:O14836	simple:P32970	TNFRSF13B	CD70	TRUE	TRUE	FALSE	InnateDB-All	FALSE	1	1	1	1	1	1	1	1	1	1	1	1	1	1	1	1	1	1	1	1	1	1	1	1	1
CPI-SS0D4BF6CA3	CD27_CD70	simple:P26842	simple:P32970	CD27	CD70	TRUE	TRUE	FALSE	curated	FALSE	1	1	1	1	1	1	1	1	1	1	1	1	1	1	1	1	1	1	1	1	1	1	1	1	1
CPI-CS06072FF4E	IL1 receptor_IL1A	complex:IL1 receptor	simple:P01583		IL1A	TRUE	TRUE	FALSE	curated	FALSE	1	1	1	1	1	1	1	1	1	1	1	1	1	1	1	1	1	1	1	1	1	1	1	1	1
CPI-CS0AC5142FA	IL1 receptor inhibitor_IL1A	complex:IL1 receptor inhibitor	simple:P01583		IL1A	TRUE	TRUE	FALSE	curated	FALSE	1	1	1	1	1	1	1	1	1	1	1	1	1	1	1	1	1	1	1	1	1	1	1	1	1
CPI-CS04CBDE052	IL10 receptor_IL10	complex:IL10 receptor	simple:P22301		IL10	TRUE	TRUE	FALSE	curated	FALSE	1	1	1	1	1	1	1	1	1	1	1	1	1	1	1	1	1	1	1	1	1	1	1	1	1
CPI-CS00BF6CD40	IL13 receptor_IL4	complex:IL13 receptor	simple:P05112		IL4	TRUE	TRUE	FALSE	curated	FALSE	1	1	1	1	1	1	1	1	1	1	1	1	1	1	1	1	1	1	1	1	1	1	1	1	1
CPI-CS0FBBCDD66	IL4 receptor_IL4	complex:IL4 receptor	simple:P05112		IL4	TRUE	TRUE	FALSE	curated	FALSE	1	1	1	1	1	1	1	1	1	1	1	1	1	1	1	1	1	1	1	1	1	1	1	1	1
CPI-CS0BA342294	IL17 receptor AE_IL17C	complex:IL17 receptor AE	simple:Q9P0M4		IL17C	TRUE	TRUE	FALSE	curated	FALSE	1	1	1	1	1	1	1	1	1	1	1	1	1	1	1	1	1	1	1	1	1	1	1	1	1
CPI-SS09F430F14	NGFR_IL2	simple:P08138	simple:P60568	NGFR	IL2	TRUE	TRUE	FALSE	I2D	FALSE	1	1	1	1	1	1	1	1	1	1	1	1	1	1	1	1	1	1	1	1	1	1	1	1	1
CPI-SS0A93C11C8	NGFR_BDNF	simple:P08138	simple:P23560	NGFR	BDNF	TRUE	TRUE	FALSE	curated	FALSE	1	1	1	1	1	1	1	1	1	1	1	1	1	1	1	1	1	1	1	1	1	1	1	1	1
CPI-SS01BCB9360	NCAM1_BDNF	simple:P13591	simple:P23560	NCAM1	BDNF	TRUE	TRUE	FALSE	I2D	FALSE	1	1	1	1	1	1	0	1	1	1	1	0	1	1	1	1	1	1	1	1	1	0	1	1	1
CPI-SS0BA3A1C3A	NGFR_NTF4	simple:P08138	simple:P34130	NGFR	NTF4	TRUE	TRUE	FALSE	curated	FALSE	1	1	1	1	1	1	1	1	1	1	1	1	1	1	1	1	1	1	1	1	1	1	1	1	1
CPI-SS0C23EF34B	NCAM1_GDNF	simple:P13591	simple:P39905	NCAM1	GDNF	TRUE	TRUE	FALSE	I2D	FALSE	1	1	1	1	1	1	1	1	1	1	1	1	1	1	1	1	1	1	1	1	1	1	1	1	1
CPI-CS0645666B0	IL20 receptor Type I_IL19	complex:IL20 receptor Type I	simple:Q9UHD0		IL19	TRUE	TRUE	FALSE	curated	FALSE	1	1	1	1	1	1	1	1	1	1	1	1	1	1	1	1	1	1	1	1	1	1	1	1	1
CPI-SS027CDEA08	NOTCH2_DLL4	simple:Q04721	simple:Q9NR61	NOTCH2	DLL4	FALSE	TRUE	FALSE	curated	FALSE	1	1	1	1	1	1	1	1	1	1	1	1	1	1	1	1	1	1	1	1	1	1	1	1	1
CPI-SS012B7C21D	NOTCH1_DLL4	simple:P46531	simple:Q9NR61	NOTCH1	DLL4	FALSE	TRUE	FALSE	curated	FALSE	1	1	1	1	1	1	1	1	1	1	1	1	1	1	1	1	1	1	1	1	1	1	1	1	1
CPI-SS003C9A532	NOTCH2_DLL3	simple:Q04721	simple:Q9NYJ7	NOTCH2	DLL3	FALSE	TRUE	FALSE	curated	FALSE	1	1	1	1	1	1	1	1	1	1	1	1	1	1	1	1	1	1	1	1	1	1	1	1	1
CPI-SS0607D1101	NOTCH1_DLL3	simple:P46531	simple:Q9NYJ7	NOTCH1	DLL3	FALSE	TRUE	FALSE	curated	FALSE	1	1	1	1	1	1	1	1	1	1	1	1	1	1	1	1	1	1	1	1	1	1	1	1	1
CPI-SS02770D68F	NOTCH2_JAG2	simple:Q04721	simple:Q9Y219	NOTCH2	JAG2	FALSE	TRUE	FALSE	curated	FALSE	1	1	1	1	1	1	1	1	1	1	1	0	1	1	1	1	0	1	1	1	1	1	1	1	1
CPI-SS08C3D27F7	NOTCH1_JAG2	simple:P46531	simple:Q9Y219	NOTCH1	JAG2	FALSE	TRUE	FALSE	curated	FALSE	1	1	1	1	1	1	1	1	1	1	1	0	1	1	1	1	1	1	1	1	1	0	1	1	1
CPI-SS0C4D54E39	NOTCH3_JAG2	simple:Q9UM47	simple:Q9Y219	NOTCH3	JAG2	FALSE	TRUE	FALSE	curated	FALSE	1	1	1	1	1	1	0	1	1	1	1	0	1	1	1	1	1	1	1	1	1	1	1	1	1
CPI-SS0B42AD9EF	NOTCH1_WNT4	simple:P46531	simple:P56705	NOTCH1	WNT4	TRUE	TRUE	FALSE	I2D	FALSE	1	1	1	1	1	1	1	1	1	1	1	1	1	1	1	1	1	1	1	1	1	1	1	1	1
CPI-SS0FA326344	FZD6_WNT4	simple:O60353	simple:P56705	FZD6	WNT4	TRUE	TRUE	FALSE	curated	FALSE	1	1	1	1	1	1	1	1	1	1	1	1	1	1	1	1	1	1	1	1	1	1	1	1	1
CPI-SS0B87FE6E0	NOTCH1_JAG1	simple:P46531	simple:P78504	NOTCH1	JAG1	FALSE	TRUE	FALSE	curated	FALSE	1	1	1	1	1	1	1	1	1	1	1	1	1	1	1	1	1	1	1	1	1	1	1	1	1
CPI-SS01A07768A	CD46_JAG1	simple:P15529	simple:P78504	CD46	JAG1	FALSE	TRUE	FALSE	curated	FALSE	1	1	1	1	1	1	1	1	1	1	1	1	1	1	1	1	1	1	1	1	1	1	1	1	1
CPI-SS0A34EE366	NOTCH1_DLK1	simple:P46531	simple:P80370	NOTCH1	DLK1	FALSE	TRUE	FALSE	curated	FALSE	1	1	1	1	1	1	1	1	1	1	1	0	1	1	1	1	1	1	1	1	1	0	1	1	1
CPI-CS0A8A0A053	IL22 receptor_IL22	complex:IL22 receptor	simple:Q9GZX6		IL22	TRUE	TRUE	FALSE	curated	FALSE	1	1	1	1	1	1	1	1	1	1	1	1	1	1	1	1	1	1	1	1	1	1	1	1	1
CPI-CC09BCDA08E	IL27_IL27 receptor	complex:IL27	complex:IL27 receptor			TRUE	FALSE	TRUE	curated	FALSE	1	1	1	1	1	1	1	1	1	1	1	1	1	1	1	1	1	1	1	1	1	1	1	1	1
CPI-CS0C59AF029	IL33 receptor_IL33	complex:IL33 receptor	simple:O95760		IL33	TRUE	TRUE	FALSE	curated	FALSE	1	1	1	1	1	1	1	1	1	1	1	1	1	1	1	1	1	1	1	1	1	1	1	1	1
CPI-CC0C3ECBD1F	IL35_IL35 receptor	complex:IL35	complex:IL35 receptor			TRUE	FALSE	TRUE	curated	FALSE	1	1	1	1	1	1	1	1	1	1	1	1	1	1	1	1	1	1	1	1	1	1	1	1	1
CPI-CS0FB8775FC	IL5 receptor_IL5	complex:IL5 receptor	simple:P05113		IL5	TRUE	TRUE	FALSE	curated	FALSE	1	1	1	1	1	1	1	1	1	1	1	1	1	1	1	1	1	1	1	1	1	1	1	1	1
CPI-CS063AE1C91	IL6 receptor_IL6	complex:IL6 receptor	simple:P05231		IL6	TRUE	TRUE	FALSE	curated	FALSE	1	1	1	1	1	1	1	1	1	1	1	1	1	1	1	1	1	1	1	1	1	1	1	1	1
CPI-CS0AB9C7139	IL7 receptor_IL7	complex:IL7 receptor	simple:P13232		IL7	TRUE	TRUE	FALSE	curated	FALSE	1	1	1	1	1	1	1	1	1	1	1	1	1	1	1	1	1	1	1	1	1	1	1	1	1
CPI-CS0E661878B	LIFR_OSM	complex:LIFR	simple:P13725		OSM	TRUE	TRUE	FALSE	curated	FALSE	1	1	1	1	1	1	1	1	1	1	1	1	1	1	1	1	1	1	1	1	1	1	1	1	1
CPI-CS06D50EBF8	OSMR_OSM	complex:OSMR	simple:P13725		OSM	TRUE	TRUE	FALSE	curated	FALSE	1	1	1	1	1	1	1	1	1	1	1	1	1	1	1	1	1	1	1	1	1	1	1	1	1
CPI-SS030EDC420	FZD9_WNT7A	simple:O00144	simple:O00755	FZD9	WNT7A	TRUE	TRUE	FALSE	I2D	FALSE	1	1	1	1	1	1	1	1	1	1	1	1	1	1	1	1	1	1	1	1	1	1	1	1	1
CPI-SS05C2D0200	FZD9_WNT1	simple:O00144	simple:P04628	FZD9	WNT1	TRUE	TRUE	FALSE	I2D	FALSE	1	1	1	1	1	1	1	1	1	1	1	1	1	1	1	1	1	1	1	1	1	1	1	1	1
CPI-SS09FF3A1EA	FZD9_WNT2	simple:O00144	simple:P09544	FZD9	WNT2	TRUE	TRUE	FALSE	curated	FALSE	1	1	1	1	1	1	1	1	1	1	1	1	1	1	1	1	1	1	1	1	1	1	1	1	1
CPI-SS00AEC3818	CCL19_ACKR4	simple:Q99731	simple:Q9NPB9	CCL19	ACKR4	TRUE	FALSE	TRUE	curated	FALSE	1	1	1	1	1	1	1	1	1	1	1	1	1	1	1	1	1	1	1	1	1	1	1	1	1
CPI-SS052B38F1C	CCL22_CCR4	simple:O00626	simple:P51679	CCL22	CCR4	TRUE	FALSE	TRUE	curated	FALSE	1	1	1	1	1	1	1	1	1	1	1	1	1	1	1	1	1	1	1	1	1	1	1	1	1
CPI-SS0AEC33FF1	CCL22_DPP4	simple:O00626	simple:P27487	CCL22	DPP4	TRUE	FALSE	TRUE	curated	FALSE	1	1	1	1	1	1	1	1	1	1	1	1	1	1	1	1	1	1	1	1	1	1	1	1	1
CPI-SS0F9BBC31B	VIP_DPP4	simple:P01282	simple:P27487	VIP	DPP4	TRUE	FALSE	TRUE	InnateDB-All,MINT	FALSE	1	1	1	1	1	1	1	1	1	1	1	1	1	1	1	1	1	1	1	1	1	1	1	1	1
CPI-SS0D377BBBF	ADCYAP1_DPP4	simple:P18509	simple:P27487	ADCYAP1	DPP4	TRUE	FALSE	TRUE	InnateDB-All,MINT	FALSE	1	1	1	1	1	1	1	1	1	1	1	1	1	1	1	1	1	1	1	1	1	1	1	1	1
CPI-SS015B2F961	CALCA_CALCR	simple:P01258	simple:P30988	CALCA	CALCR	TRUE	FALSE	TRUE	guidetopharmacology.org	FALSE	1	1	1	1	1	1	1	1	1	1	1	1	1	1	1	1	1	1	1	1	1	1	1	1	1
CPI-SS0F531DDEB	CALCA_CALCR	simple:P06881	simple:P30988	CALCA	CALCR	TRUE	FALSE	TRUE	guidetopharmacology.org	FALSE	1	1	1	1	1	1	1	1	1	1	1	1	1	1	1	1	1	1	1	1	1	1	1	1	1
CPI-SS07CF0C6E7	CALCB_CALCR	simple:P10092	simple:P30988	CALCB	CALCR	TRUE	FALSE	TRUE	guidetopharmacology.org	FALSE	1	1	1	1	1	1	1	1	1	1	1	1	1	1	1	1	1	1	1	1	1	1	1	1	1
CPI-SS07835EECF	VIP_AVPR1A	simple:P01282	simple:P37288	VIP	AVPR1A	TRUE	FALSE	TRUE	IMEx,IntAct	FALSE	1	1	1	1	1	1	1	1	1	1	1	1	1	1	1	1	1	1	1	1	1	1	1	1	1
CPI-SS0C8A09915	VIP_VIPR1	simple:P01282	simple:P32241	VIP	VIPR1	TRUE	FALSE	TRUE	guidetopharmacology.org	FALSE	1	1	1	1	1	1	1	1	1	1	1	1	1	1	1	1	1	1	1	1	1	1	1	1	1
CPI-SS062DED513	ADCYAP1_VIPR1	simple:P18509	simple:P32241	ADCYAP1	VIPR1	TRUE	FALSE	TRUE	I2D	FALSE	1	1	1	1	1	1	1	1	1	1	1	1	1	1	1	1	1	1	1	1	1	1	1	1	1
CPI-SS003AFD9BA	GHRH_VIPR1	simple:P01286	simple:P32241	GHRH	VIPR1	TRUE	FALSE	TRUE	guidetopharmacology.org	FALSE	1	1	1	1	1	1	1	1	1	1	1	1	1	1	1	1	1	1	1	1	1	1	1	1	1
CPI-SS0EC70F078	SCT_VIPR1	simple:P09683	simple:P32241	SCT	VIPR1	TRUE	FALSE	TRUE	I2D,InnateDB-All	FALSE	1	1	1	1	1	1	1	1	1	1	1	1	1	1	1	1	1	1	1	1	1	1	1	1	1
CPI-SS05B60E59C	VIP_VIPR2	simple:P01282	simple:P41587	VIP	VIPR2	TRUE	FALSE	TRUE	I2D	FALSE	1	1	1	1	1	1	1	1	1	1	1	1	1	1	1	1	1	1	1	1	1	1	1	1	1
CPI-SS02CCE14A7	ADCYAP1_VIPR2	simple:P18509	simple:P41587	ADCYAP1	VIPR2	TRUE	FALSE	TRUE	I2D	FALSE	1	1	1	1	1	1	1	1	1	1	1	1	1	1	1	1	1	1	1	1	1	1	1	1	1
CPI-SS04A7BCE8D	NPPA_NPR3	simple:P01160	simple:P17342	NPPA	NPR3	TRUE	FALSE	TRUE	I2D,InnateDB-All	FALSE	1	1	1	1	1	1	1	1	1	1	1	1	1	1	1	1	1	1	1	1	1	1	1	1	1
CPI-SS0230EE330	NPPA_NPR2	simple:P01160	simple:P20594	NPPA	NPR2	TRUE	FALSE	TRUE	I2D,InnateDB-All	FALSE	1	1	1	1	1	1	1	1	1	1	1	1	1	1	1	1	1	1	1	1	1	1	1	1	1
CPI-SS0098B5107	ADCYAP1_SCTR	simple:P18509	simple:P47872	ADCYAP1	SCTR	TRUE	FALSE	TRUE	I2D,InnateDB-All	FALSE	1	1	1	1	1	1	1	1	1	1	1	1	1	1	1	1	1	1	1	1	1	1	1	1	1
CPI-SS021F26C73	SCT_SCTR	simple:P09683	simple:P47872	SCT	SCTR	TRUE	FALSE	TRUE	guidetopharmacology.org	FALSE	1	1	1	1	1	1	1	1	1	1	1	1	1	1	1	1	1	1	1	1	1	1	1	1	1
CPI-SS0133239EA	ADCYAP1_ADCYAP1R1	simple:P18509	simple:P41586	ADCYAP1	ADCYAP1R1	TRUE	FALSE	TRUE	I2D,IMEx	FALSE	1	1	1	1	1	1	1	1	1	1	1	1	1	1	1	1	1	1	1	1	1	1	1	1	1
CPI-SS02928C71A	PDGFB_LRP1	simple:P01127	simple:Q07954	PDGFB	LRP1	TRUE	FALSE	TRUE	I2D,InnateDB-All	FALSE	1	1	1	1	1	1	1	1	1	1	1	1	1	1	1	1	0	0	0	0	1	1	1	1	1
CPI-SS006C6537E	MDK_LRP1	simple:P21741	simple:Q07954	MDK	LRP1	TRUE	FALSE	TRUE	I2D,InnateDB-All	FALSE	1	1	1	1	1	1	1	1	1	1	1	1	1	1	1	1	1	1	1	1	1	1	1	1	1
CPI-SS0472C478C	BMP7_PTPRK	simple:P18075	simple:Q15262	BMP7	PTPRK	TRUE	FALSE	TRUE	InnateDB-All	FALSE	1	1	1	1	1	1	1	1	1	1	1	1	1	1	1	1	1	1	1	1	1	1	1	1	1
CPI-SS0CB863B46	WNT5A_PTPRK	simple:P41221	simple:Q15262	WNT5A	PTPRK	TRUE	FALSE	TRUE	InnateDB-All	FALSE	1	1	1	1	1	1	1	1	1	1	1	1	1	1	1	1	1	1	1	1	1	1	1	1	1
CPI-SS083CBFACD	MDK_SORL1	simple:P21741	simple:Q92673	MDK	SORL1	TRUE	FALSE	TRUE	InnateDB-All	FALSE	1	1	1	1	1	1	1	1	1	1	1	1	1	1	1	1	1	1	1	1	1	1	1	1	1
CPI-SS05A26A1DE	PDGFB_PDGFRB	simple:P01127	simple:P09619	PDGFB	PDGFRB	TRUE	FALSE	TRUE	curated	FALSE	1	1	1	1	1	1	1	1	1	1	1	1	1	1	1	1	1	0	1	1	1	1	1	1	1
CPI-SS0FEEB187C	PDGFB_PDGFRA	simple:P01127	simple:P16234	PDGFB	PDGFRA	TRUE	FALSE	TRUE	curated	FALSE	1	1	1	1	1	1	1	1	1	1	1	1	1	1	1	1	1	1	1	0	1	1	1	1	1
CPI-SS0B70EB09E	PDGFA_PDGFRA	simple:P04085	simple:P16234	PDGFA	PDGFRA	TRUE	FALSE	TRUE	curated	FALSE	1	1	1	1	1	1	1	1	1	0	1	1	1	1	1	1	1	1	1	1	1	1	1	1	1
CPI-SC033E22B14	PDGFB_PDGFR complex	simple:P01127	complex:PDGFR complex	PDGFB		TRUE	FALSE	TRUE	curated	FALSE	1	1	1	1	1	1	1	1	1	1	1	1	1	1	1	1	1	1	1	1	1	1	1	1	1
CPI-SS0CB4F2FE4	PDGFB_ADGRV1	simple:P01127	simple:Q8WXG9	PDGFB	ADGRV1	TRUE	FALSE	TRUE	InnateDB-All	FALSE	1	1	1	1	1	1	1	1	1	1	1	1	1	1	1	1	0	1	1	1	1	1	1	1	1
CPI-SS027E12A36	MDK_PTPRZ1	simple:P21741	simple:P23471	MDK	PTPRZ1	TRUE	FALSE	FALSE	curated	FALSE	1	1	1	1	1	1	1	1	1	1	1	1	1	1	1	1	1	1	1	1	1	1	1	1	1
CPI-SS04E690D72	PTN_PTPRZ1	simple:P21246	simple:P23471	PTN	PTPRZ1	TRUE	FALSE	FALSE	curated	FALSE	1	0	0	1	0	1	0	0	1	0	1	1	0	1	0	1	1	0	1	0	1	0	0	1	0
CPI-SS012AFC842	MDK_ALK	simple:P21741	simple:Q9UM73	MDK	ALK	TRUE	FALSE	TRUE	curated	FALSE	1	1	1	1	1	1	1	1	1	1	1	1	1	1	1	1	1	1	1	1	1	1	1	1	1
CPI-SS05D7900BF	PTN_ALK	simple:P21246	simple:Q9UM73	PTN	ALK	TRUE	FALSE	TRUE	curated	FALSE	1	0	1	1	0	1	0	1	1	0	1	0	1	1	0	1	0	1	1	1	1	0	1	1	0
CPI-SS0193C3064	WNT1_FZD8	simple:P04628	simple:Q9H461	WNT1	FZD8	TRUE	FALSE	TRUE	I2D,InnateDB-All	FALSE	1	1	1	1	1	1	1	1	1	1	1	1	1	1	1	1	1	1	1	1	1	1	1	1	1
CPI-SS0D782F60B	WNT4_FZD8	simple:P56705	simple:Q9H461	WNT4	FZD8	TRUE	FALSE	TRUE	I2D	FALSE	1	1	1	1	1	1	1	1	1	1	1	1	1	1	1	1	1	1	1	1	1	1	1	1	1
CPI-SS0B2D5BA95	WNT5A_FZD1	simple:P41221	simple:Q9UP38	WNT5A	FZD1	TRUE	FALSE	TRUE	curated	FALSE	1	1	1	1	1	1	1	1	1	1	1	1	1	1	1	1	1	1	1	1	1	1	1	1	1
CPI-SS0DC5ADBF1	WNT1_FZD1	simple:P04628	simple:Q9UP38	WNT1	FZD1	TRUE	FALSE	TRUE	curated	FALSE	1	1	1	1	1	1	1	1	1	1	1	1	1	1	1	1	1	1	1	1	1	1	1	1	1
CPI-SS0CA020C34	WNT4_FZD1	simple:P56705	simple:Q9UP38	WNT4	FZD1	TRUE	FALSE	TRUE	I2D	FALSE	1	1	1	1	1	1	1	1	1	1	1	1	1	1	1	1	1	1	1	1	1	1	1	1	1
CPI-SS0E4DE8215	WNT2_FZD1	simple:P09544	simple:Q9UP38	WNT2	FZD1	TRUE	FALSE	TRUE	I2D	FALSE	1	1	1	1	1	1	1	1	1	1	1	1	1	1	1	1	1	1	1	1	1	1	1	1	1
CPI-SS0E7523314	WNT3_FZD1	simple:P56703	simple:Q9UP38	WNT3	FZD1	TRUE	FALSE	TRUE	I2D	FALSE	1	1	1	1	1	1	1	1	1	1	1	1	1	1	1	1	1	1	1	1	1	1	1	1	1
CPI-SS0D81C6C1D	WNT7B_FZD1	simple:P56706	simple:Q9UP38	WNT7B	FZD1	TRUE	FALSE	TRUE	curated	FALSE	1	1	1	1	1	1	1	1	1	1	1	1	1	1	1	1	1	1	1	1	1	1	1	1	1
CPI-SS01C2BA5C8	WNT5A_FZD2	simple:P41221	simple:Q14332	WNT5A	FZD2	TRUE	FALSE	TRUE	curated	FALSE	1	1	1	1	1	1	1	1	1	1	1	1	1	1	1	1	1	1	1	1	1	1	1	1	1
CPI-SS02C418D99	WNT2_FZD2	simple:P09544	simple:Q14332	WNT2	FZD2	TRUE	FALSE	TRUE	curated	FALSE	1	1	1	1	1	1	1	1	1	1	1	1	1	1	1	1	1	1	1	1	1	1	1	1	1
CPI-SS0097929A7	BMP7_SLAMF1	simple:P18075	simple:Q13291	BMP7	SLAMF1	TRUE	FALSE	TRUE	InnateDB-All	FALSE	1	1	1	1	1	1	1	1	1	1	1	1	1	1	1	1	1	1	1	1	1	1	1	1	1
CPI-SS0E32BEF02	WNT5A_FZD5	simple:P41221	simple:Q13467	WNT5A	FZD5	TRUE	FALSE	TRUE	curated	FALSE	1	1	1	1	1	1	1	1	1	1	1	1	1	1	1	1	1	1	1	1	1	1	1	1	1
CPI-SS05550A895	WNT7A_FZD5	simple:O00755	simple:Q13467	WNT7A	FZD5	TRUE	FALSE	TRUE	curated	FALSE	1	1	1	1	1	1	1	1	1	1	1	1	1	1	1	1	1	1	1	1	1	1	1	1	1
CPI-SS0D4F593F1	WNT5A_EPHA7	simple:P41221	simple:Q15375	WNT5A	EPHA7	TRUE	FALSE	TRUE	InnateDB-All	FALSE	1	1	1	1	1	1	1	1	1	1	1	1	1	1	1	1	1	1	1	1	1	1	1	1	1
CPI-SS01DCC7684	EFNA2_EPHA7	simple:O43921	simple:Q15375	EFNA2	EPHA7	FALSE	FALSE	TRUE	curated	FALSE	1	1	1	1	1	1	1	1	1	1	1	1	1	1	1	1	1	1	1	1	1	1	1	1	1
CPI-SS03E450F99	EFNA1_EPHA7	simple:P20827	simple:Q15375	EFNA1	EPHA7	TRUE	FALSE	TRUE	curated	FALSE	1	1	1	1	1	1	1	1	1	1	1	1	1	1	1	1	1	1	1	1	1	1	1	1	1
CPI-SS0D5DBB634	EFNA3_EPHA7	simple:P52797	simple:Q15375	EFNA3	EPHA7	FALSE	FALSE	TRUE	curated	FALSE	1	1	1	1	1	1	1	1	1	1	1	1	1	1	1	1	1	1	1	1	1	1	1	1	1
CPI-SS0F81DBF22	EFNA4_EPHA7	simple:P52798	simple:Q15375	EFNA4	EPHA7	TRUE	FALSE	TRUE	curated	FALSE	1	1	1	1	1	1	1	1	1	1	1	1	1	1	1	1	1	1	1	1	1	1	1	1	1
CPI-SS028688B7B	EFNA5_EPHA7	simple:P52803	simple:Q15375	EFNA5	EPHA7	FALSE	FALSE	TRUE	curated	FALSE	1	1	1	1	1	1	0	0	1	0	1	1	1	1	1	1	1	1	1	1	1	1	1	1	1
CPI-SS0C56C483F	WNT5A_ANTXR1	simple:P41221	simple:Q9H6X2	WNT5A	ANTXR1	TRUE	FALSE	TRUE	InnateDB-All	FALSE	1	1	1	1	1	1	1	1	1	1	1	1	1	1	1	1	1	1	1	1	1	1	1	1	1
CPI-SS0E7CBFD03	WNT5A_ROR2	simple:P41221	simple:Q01974	WNT5A	ROR2	TRUE	FALSE	TRUE	I2D	FALSE	1	1	1	1	1	1	1	1	1	1	1	1	1	1	1	1	1	1	1	1	1	1	1	1	1
CPI-SS00A6240B6	WNT1_ROR2	simple:P04628	simple:Q01974	WNT1	ROR2	TRUE	FALSE	TRUE	InnateDB-All	FALSE	1	1	1	1	1	1	1	1	1	1	1	1	1	1	1	1	1	1	1	1	1	1	1	1	1
CPI-SS002673EFE	WNT5A_FZD3	simple:P41221	simple:Q9NPG1	WNT5A	FZD3	TRUE	FALSE	TRUE	curated	FALSE	1	1	1	1	1	1	1	1	1	1	1	1	1	1	1	1	1	1	1	1	1	1	1	1	1
CPI-SS014B0FCD2	WNT1_FZD3	simple:P04628	simple:Q9NPG1	WNT1	FZD3	TRUE	FALSE	TRUE	I2D	FALSE	1	1	1	1	1	1	1	1	1	1	1	1	1	1	1	1	1	1	1	1	1	1	1	1	1
CPI-SS0F26BB901	WNT2_FZD3	simple:P09544	simple:Q9NPG1	WNT2	FZD3	TRUE	FALSE	TRUE	curated	FALSE	1	1	1	1	1	1	1	1	1	1	1	1	1	1	1	1	1	1	1	1	1	1	1	1	1
CPI-SS073F3FAD5	WNT5A_ROR1	simple:P41221	simple:Q01973	WNT5A	ROR1	TRUE	FALSE	TRUE	IMEx	FALSE	1	1	1	1	1	1	1	1	1	1	1	1	1	1	1	1	1	1	1	1	1	1	1	1	1
CPI-SS0AD0ED887	TNFRSF11B_TNFSF10	simple:O00300	simple:P50591	TNFRSF11B	TNFSF10	TRUE	FALSE	FALSE	curated	FALSE	1	1	1	1	1	1	1	1	1	1	1	1	1	1	1	1	1	1	1	1	1	1	1	1	1
CPI-SS0898D7F7F	TNFRSF10B_TNFSF10	simple:O14763	simple:P50591	TNFRSF10B	TNFSF10	TRUE	TRUE	FALSE	curated	FALSE	1	1	1	1	1	1	1	1	1	1	1	1	1	1	1	1	1	1	1	1	1	1	1	1	1
CPI-SS023738D54	FGFR1_FGF3	simple:P11362	simple:P11487	FGFR1	FGF3	TRUE	TRUE	FALSE	I2D,InnateDB-All	FALSE	1	1	1	1	1	1	1	1	1	1	1	1	1	1	1	1	1	1	1	1	1	1	1	1	1
CPI-SS0E0BCE16F	FGFR1_FGF5	simple:P11362	simple:P12034	FGFR1	FGF5	TRUE	TRUE	FALSE	I2D,InnateDB-All	FALSE	1	1	1	1	1	1	1	1	1	1	1	1	1	1	1	1	1	1	1	1	1	1	1	1	1
CPI-SS039799099	FGFR1_NCAM1	simple:P11362	simple:P13591	FGFR1	NCAM1	TRUE	TRUE	TRUE	curated	FALSE	1	1	1	1	1	1	0	0	1	0	1	0	0	1	0	1	1	1	1	1	1	0	1	1	0
CPI-SS07833475A	FGFR1_FGF7	simple:P11362	simple:P21781	FGFR1	FGF7	TRUE	TRUE	FALSE	I2D	FALSE	1	1	1	1	1	1	1	1	1	1	1	1	1	1	1	1	1	1	1	1	1	1	1	1	1
CPI-SS038E93B77	FGFR1_FGF9	simple:P11362	simple:P31371	FGFR1	FGF9	TRUE	TRUE	FALSE	I2D,InnateDB-All	FALSE	1	1	1	1	1	1	0	1	1	1	1	0	1	1	1	1	1	1	1	1	1	1	1	1	1
CPI-SS0907A7598	FGFR2_FGF9	simple:P21802	simple:P31371	FGFR2	FGF9	TRUE	TRUE	FALSE	I2D,InnateDB-All	FALSE	1	1	1	1	1	1	0	1	1	1	1	1	1	1	1	1	1	1	1	1	1	1	1	1	1
CPI-SS0649EA05F	FGFR4_FGF9	simple:P22455	simple:P31371	FGFR4	FGF9	TRUE	TRUE	FALSE	I2D	FALSE	1	1	1	1	1	1	1	1	1	1	1	1	1	1	1	1	1	1	1	1	1	1	1	1	1
CPI-SS07A9A501C	FGFR3_FGF9	simple:P22607	simple:P31371	FGFR3	FGF9	TRUE	TRUE	FALSE	I2D,InnateDB-All	FALSE	1	1	1	1	1	1	1	1	1	1	1	0	1	1	1	1	1	1	1	1	1	1	1	1	1
CPI-SS07A0F4D73	FGFR1_FGF23	simple:P11362	simple:Q9GZV9	FGFR1	FGF23	TRUE	TRUE	FALSE	IMEx,InnateDB-All	FALSE	1	1	1	1	1	1	1	1	1	1	1	1	1	1	1	1	1	1	1	1	1	1	1	1	1
CPI-SS01D785DBA	FGFR2_FGF23	simple:P21802	simple:Q9GZV9	FGFR2	FGF23	TRUE	TRUE	FALSE	I2D,IMEx,InnateDB-All,IntAct	FALSE	1	1	1	1	1	1	1	1	1	1	1	1	1	1	1	1	1	1	1	1	1	1	1	1	1
CPI-SS0883B7EE4	FGFR3_FGF23	simple:P22607	simple:Q9GZV9	FGFR3	FGF23	TRUE	TRUE	FALSE	I2D	FALSE	1	1	1	1	1	1	1	1	1	1	1	1	1	1	1	1	1	1	1	1	1	1	1	1	1
CPI-SS0BF490275	FGFR1_KL	simple:P11362	simple:Q9UEF7	FGFR1	KL	TRUE	TRUE	FALSE	I2D	FALSE	1	1	1	1	1	1	1	1	1	1	1	1	1	1	1	1	1	1	1	1	1	1	1	1	1
CPI-SS06A0B20BD	FGFR2_EPHA4	simple:P21802	simple:P54764	FGFR2	EPHA4	TRUE	TRUE	TRUE	I2D,InnateDB-All	FALSE	1	1	1	1	1	0	0	0	1	0	1	1	1	1	1	1	1	1	1	1	1	1	1	1	1
CPI-SS0E63AB61E	EFNA2_EPHA4	simple:O43921	simple:P54764	EFNA2	EPHA4	FALSE	FALSE	TRUE	curated	FALSE	1	1	1	1	1	1	1	1	1	1	1	1	1	1	1	1	1	1	1	1	1	1	1	1	1
CPI-SS0EBFE1854	EFNA1_EPHA4	simple:P20827	simple:P54764	EFNA1	EPHA4	TRUE	FALSE	TRUE	curated	FALSE	1	1	1	1	1	1	1	1	1	1	1	1	1	1	1	1	1	1	1	1	1	1	1	1	1
CPI-SS05B4EB419	EFNA3_EPHA4	simple:P52797	simple:P54764	EFNA3	EPHA4	FALSE	FALSE	TRUE	curated	FALSE	1	1	1	1	1	1	1	1	1	1	1	1	1	1	1	1	1	1	1	1	1	1	1	1	1
CPI-SS0659DBE72	EFNA4_EPHA4	simple:P52798	simple:P54764	EFNA4	EPHA4	TRUE	FALSE	TRUE	curated	FALSE	1	1	1	1	1	1	1	1	1	1	1	1	1	1	1	1	1	1	1	1	1	1	1	1	1
CPI-SS0FC01B947	EFNA5_EPHA4	simple:P52803	simple:P54764	EFNA5	EPHA4	FALSE	FALSE	TRUE	curated	FALSE	1	1	1	1	1	0	0	0	1	0	1	1	1	1	1	1	1	1	1	1	1	1	1	1	1
CPI-SS087E0E3FB	EFNB2_EPHA4	simple:P52799	simple:P54764	EFNB2	EPHA4	FALSE	TRUE	TRUE	curated	FALSE	1	1	1	1	1	1	0	0	1	1	1	1	1	1	1	1	1	1	1	1	1	1	1	1	1
CPI-SS0816A4ED4	FGFR4_EPHA4	simple:P22455	simple:P54764	FGFR4	EPHA4	TRUE	TRUE	TRUE	I2D,InnateDB-All	FALSE	1	1	1	1	1	1	1	1	1	1	1	1	1	1	1	1	1	1	1	1	1	1	1	1	1
CPI-SS0D1AE5C79	FGFR3_EPHA4	simple:P22607	simple:P54764	FGFR3	EPHA4	TRUE	TRUE	TRUE	I2D,InnateDB-All	FALSE	1	1	1	1	1	1	1	1	1	1	0	0	0	1	0	1	1	1	1	1	1	1	1	1	1
CPI-SS00D9A0644	FGFR2_CD83	simple:P21802	simple:Q01151	FGFR2	CD83	TRUE	TRUE	TRUE	InnateDB-All	FALSE	1	1	1	1	1	1	0	1	1	1	1	1	1	1	1	1	1	1	1	1	1	1	1	1	1
CPI-SS02E314589	FGFR2_NECTIN1	simple:P21802	simple:Q15223	FGFR2	NECTIN1	TRUE	TRUE	TRUE	InnateDB-All	FALSE	1	1	1	1	1	0	0	1	1	0	1	1	1	1	1	1	1	1	1	1	1	1	1	1	1
CPI-SS02C29C238	FGFR3_NECTIN1	simple:P22607	simple:Q15223	FGFR3	NECTIN1	TRUE	TRUE	TRUE	InnateDB-All	FALSE	1	1	1	1	1	1	1	1	1	1	0	0	1	1	0	1	1	1	1	1	1	1	1	1	1
CPI-SS03F821467	CD96_NECTIN1	simple:P40200	simple:Q15223	CD96	NECTIN1	TRUE	TRUE	TRUE	curated	FALSE	1	1	1	1	1	1	1	1	1	1	1	1	1	1	1	1	1	1	1	1	1	1	1	1	1
CPI-SS0CC898553	FGFR2_PTPRR	simple:P21802	simple:Q15256	FGFR2	PTPRR	TRUE	TRUE	TRUE	InnateDB-All	FALSE	1	0	1	1	1	1	0	1	1	0	1	0	1	1	1	1	1	1	1	1	1	1	1	1	1
CPI-SS0658257AC	FGFR4_PTPRR	simple:P22455	simple:Q15256	FGFR4	PTPRR	TRUE	TRUE	TRUE	InnateDB-All	FALSE	1	1	1	1	1	1	1	1	1	1	1	1	1	1	1	1	1	1	1	1	1	1	1	1	1
CPI-SS098F416C1	FGFR2_XPR1	simple:P21802	simple:Q9UBH6	FGFR2	XPR1	TRUE	TRUE	TRUE	InnateDB-All	FALSE	1	0	1	1	1	0	0	0	0	0	1	1	1	1	1	1	1	1	1	1	1	1	1	1	1
CPI-SS0EB136379	WNT1_CD36	simple:P04628	simple:P16671	WNT1	CD36	TRUE	FALSE	TRUE	InnateDB	FALSE	1	1	1	1	1	1	1	1	1	1	1	1	1	1	1	1	1	1	1	1	1	1	1	1	1
CPI-SS0D8972B21	WNT1_RYK	simple:P04628	simple:P34925	WNT1	RYK	TRUE	FALSE	TRUE	I2D	FALSE	1	1	1	1	1	1	1	1	1	1	1	1	1	1	1	1	1	1	1	1	1	1	1	1	1
CPI-SS0A69F13A3	WNT4_SMO	simple:P56705	simple:Q99835	WNT4	SMO	TRUE	FALSE	TRUE	I2D	FALSE	1	1	1	1	1	1	1	1	1	1	1	1	1	1	1	1	1	1	1	1	1	1	1	1	1
CPI-SS016B7C7D6	BMP2_SMO	simple:P12643	simple:Q99835	BMP2	SMO	TRUE	FALSE	TRUE	I2D	FALSE	1	1	1	1	1	1	1	1	1	1	1	1	1	1	1	1	1	1	1	1	1	1	1	1	1
CPI-SS0C2561156	WNT2_FZD4	simple:P09544	simple:Q9ULV1	WNT2	FZD4	TRUE	FALSE	TRUE	curated	FALSE	1	1	1	1	1	1	1	1	1	1	1	1	1	1	1	1	1	1	1	1	1	1	1	1	1
CPI-SS0B8083B44	WNT7B_FZD4	simple:P56706	simple:Q9ULV1	WNT7B	FZD4	TRUE	FALSE	TRUE	curated	FALSE	1	1	1	1	1	1	1	1	1	1	1	1	1	1	1	1	1	1	1	1	1	1	1	1	1
CPI-SS01469637C	WNT2B_FZD4	simple:Q93097	simple:Q9ULV1	WNT2B	FZD4	TRUE	FALSE	TRUE	curated	FALSE	1	1	1	1	1	1	1	1	1	1	1	1	1	1	1	1	1	1	1	1	1	1	1	1	1
CPI-SS0A683CBC1	WNT7B_FZD10	simple:P56706	simple:Q9ULW2	WNT7B	FZD10	TRUE	FALSE	TRUE	curated	FALSE	1	1	1	1	1	1	1	1	1	1	1	1	1	1	1	1	1	1	1	1	1	1	1	1	1
CPI-SS0423580E5	DLL1_NOTCH2	simple:O00548	simple:Q04721	DLL1	NOTCH2	FALSE	FALSE	TRUE	curated	FALSE	1	1	1	1	1	1	1	1	1	1	1	1	1	1	1	1	1	1	1	1	1	1	1	1	1
CPI-SS060B82BBC	JAG1_NOTCH2	simple:P78504	simple:Q04721	JAG1	NOTCH2	FALSE	FALSE	TRUE	curated	FALSE	1	1	1	1	1	1	1	1	1	1	1	1	1	1	1	1	1	1	1	1	1	1	1	1	1
CPI-SS0E1A8414D	DLK1_NOTCH2	simple:P80370	simple:Q04721	DLK1	NOTCH2	FALSE	FALSE	TRUE	curated	FALSE	1	1	1	1	1	1	1	0	0	1	1	1	1	1	1	1	1	1	1	1	1	1	1	1	1
CPI-SS047232C64	DLL1_NOTCH3	simple:O00548	simple:Q9UM47	DLL1	NOTCH3	FALSE	FALSE	TRUE	curated	FALSE	1	1	1	1	1	1	1	1	1	1	1	1	1	1	1	1	1	1	1	1	1	1	1	1	1
CPI-SS0B99F22A2	JAG1_NOTCH3	simple:P78504	simple:Q9UM47	JAG1	NOTCH3	FALSE	FALSE	TRUE	curated	FALSE	1	1	1	1	1	1	1	1	1	1	1	1	1	1	1	1	1	1	1	1	1	1	1	1	1
CPI-SS007AA9FDE	DLK1_NOTCH3	simple:P80370	simple:Q9UM47	DLK1	NOTCH3	FALSE	FALSE	TRUE	curated	FALSE	1	1	1	1	1	1	0	0	1	1	1	1	1	1	1	1	1	1	1	1	1	1	1	1	1
CPI-SS0F21DBF93	SCGB3A1_NOTCH3	simple:Q96QR1	simple:Q9UM47	SCGB3A1	NOTCH3	TRUE	FALSE	TRUE	InnateDB-All	FALSE	1	1	1	1	1	1	1	1	1	1	1	1	1	1	1	1	1	1	1	1	1	1	1	1	1
CPI-SS0938C6980	DLL4_NOTCH3	simple:Q9NR61	simple:Q9UM47	DLL4	NOTCH3	FALSE	FALSE	TRUE	curated	FALSE	1	1	1	1	1	1	1	1	1	1	1	1	1	1	1	1	1	1	1	1	1	1	1	1	1
CPI-SS035E5A708	DLL3_NOTCH3	simple:Q9NYJ7	simple:Q9UM47	DLL3	NOTCH3	FALSE	FALSE	TRUE	curated	FALSE	1	1	1	1	1	1	1	1	1	1	1	1	1	1	1	1	1	1	1	1	1	1	1	1	1
CPI-SS0BFB29A42	PLXNB2_PTN	simple:O15031	simple:P21246	PLXNB2	PTN	TRUE	TRUE	FALSE	I2D,IMEx,InnateDB-All,IntAct	FALSE	1	1	1	1	1	1	1	1	1	1	1	1	1	1	1	0	0	1	1	0	1	1	1	1	1
CPI-SS08FAC0A55	PLXNB2_SEMA4D	simple:O15031	simple:Q92854	PLXNB2	SEMA4D	FALSE	TRUE	TRUE	curated	FALSE	1	1	1	1	1	1	1	1	1	1	1	1	1	1	1	0	0	1	0	1	1	1	1	1	1
CPI-SS0CCCF7C69	PLXNB1_SEMA4D	simple:O43157	simple:Q92854	PLXNB1	SEMA4D	TRUE	TRUE	TRUE	curated	FALSE	1	1	1	1	1	1	1	1	1	1	0	0	1	0	1	1	1	1	1	1	1	0	1	1	1
CPI-SS06AA638A8	CD72_SEMA4D	simple:P21854	simple:Q92854	CD72	SEMA4D	FALSE	FALSE	TRUE	curated	FALSE	1	1	1	1	1	1	1	1	1	1	1	1	1	1	1	1	1	1	1	1	1	1	1	1	1
CPI-SS0C0A61F92	PLXNB2_SEMA4G	simple:O15031	simple:Q9NTN9	PLXNB2	SEMA4G	FALSE	TRUE	FALSE	curated	FALSE	1	1	1	1	1	1	1	1	1	1	1	1	1	1	1	1	0	1	1	1	1	1	1	1	1
CPI-SS0EBA5A4D8	VEGFD_KDR	simple:O43915	simple:P35968	VEGFD	KDR	TRUE	FALSE	TRUE	curated	FALSE	1	1	1	1	1	1	1	1	1	1	1	1	1	1	1	1	1	1	1	1	1	1	1	1	1
CPI-SS0C03F7CDC	VEGFA_KDR	simple:P15692	simple:P35968	VEGFA	KDR	TRUE	FALSE	TRUE	curated	FALSE	1	1	1	1	1	1	1	1	1	1	1	1	1	1	1	1	1	1	1	1	1	1	1	1	1
CPI-SS03156A825	LTA_LTBR	simple:P01374	simple:P36941	LTA	LTBR	TRUE	FALSE	TRUE	I2D	FALSE	1	1	1	1	1	1	1	1	1	1	1	1	1	1	1	1	1	1	1	1	1	1	1	1	1
CPI-SS0110361CB	LTA_TNFRSF14	simple:P01374	simple:Q92956	LTA	TNFRSF14	TRUE	FALSE	TRUE	curated	FALSE	1	1	1	1	1	1	1	1	1	1	1	1	1	1	1	1	1	1	1	1	1	1	1	1	1
CPI-SS0C28FEC7D	TNFSF13_TNFRSF14	simple:O75888	simple:Q92956	TNFSF13	TNFRSF14	TRUE	FALSE	TRUE	I2D,InnateDB-All	FALSE	1	1	1	1	1	1	1	1	1	1	1	1	1	1	1	1	1	1	1	1	1	1	1	1	1
CPI-SS0879B8E95	CD160_TNFRSF14	simple:O95971	simple:Q92956	CD160	TNFRSF14	FALSE	TRUE	TRUE	curated	FALSE	1	1	1	1	1	1	1	1	1	1	1	1	1	1	1	1	1	1	1	1	1	1	1	1	1
CPI-SS02ACCF1F7	MIF_TNFRSF14	simple:P14174	simple:Q92956	MIF	TNFRSF14	TRUE	FALSE	TRUE	I2D,IntAct	FALSE	1	1	1	1	1	1	1	1	1	1	1	1	1	1	1	1	1	1	1	1	1	1	1	1	1
CPI-SS08330207B	BTLA_TNFRSF14	simple:Q7Z6A9	simple:Q92956	BTLA	TNFRSF14	FALSE	TRUE	TRUE	guidetopharmacology.org	FALSE	1	1	1	1	1	1	1	1	1	1	1	1	1	1	1	1	1	1	1	1	1	1	1	1	1
CPI-SS0B89DD8C1	TNFSF13_TNFRSF17	simple:O75888	simple:Q02223	TNFSF13	TNFRSF17	TRUE	FALSE	TRUE	curated	FALSE	1	1	1	1	1	1	1	1	1	1	1	1	1	1	1	1	1	1	1	1	1	1	1	1	1
CPI-SS0C412B7DE	CD70_TNFRSF17	simple:P32970	simple:Q02223	CD70	TNFRSF17	TRUE	FALSE	TRUE	InnateDB-All	FALSE	1	1	1	1	1	1	1	1	1	1	1	1	1	1	1	1	1	1	1	1	1	1	1	1	1
CPI-SS095E52E66	TNFSF10_TNFRSF10D	simple:P50591	simple:Q9UBN6	TNFSF10	TNFRSF10D	TRUE	FALSE	TRUE	curated	FALSE	1	1	1	1	1	1	1	1	1	1	1	1	1	1	1	1	1	1	1	1	1	1	1	1	1
CPI-SS059EEFDC6	MIF_TNFRSF10D	simple:P14174	simple:Q9UBN6	MIF	TNFRSF10D	TRUE	FALSE	TRUE	I2D,IntAct	FALSE	1	1	1	1	1	1	1	1	1	1	1	1	1	1	1	1	1	1	1	1	1	1	1	1	1
CPI-SS0A81A3626	WNT7A_LDLR	simple:O00755	simple:P01130	WNT7A	LDLR	TRUE	FALSE	TRUE	InnateDB-All	FALSE	1	1	1	1	1	1	1	1	1	1	1	1	1	1	1	1	1	1	1	1	1	1	1	1	1
CPI-SS0B34CBA4B	EFNA2_EPHA1	simple:O43921	simple:P21709	EFNA2	EPHA1	FALSE	FALSE	TRUE	curated	FALSE	1	1	1	1	1	1	1	1	1	1	1	1	1	1	1	1	1	1	1	1	1	1	1	1	1
CPI-SS0FF49C823	EFNA1_EPHA1	simple:P20827	simple:P21709	EFNA1	EPHA1	TRUE	FALSE	TRUE	curated	FALSE	1	1	1	1	1	1	1	1	1	1	1	1	1	1	1	1	1	1	1	1	1	1	1	1	1
CPI-SS08A54963F	EFNA2_EPHA2	simple:O43921	simple:P29317	EFNA2	EPHA2	FALSE	FALSE	TRUE	curated	FALSE	1	1	1	1	1	1	1	1	1	1	1	1	1	1	1	1	1	1	1	1	1	1	1	1	1
CPI-SS046F6F0C1	EFNA1_EPHA2	simple:P20827	simple:P29317	EFNA1	EPHA2	TRUE	FALSE	TRUE	curated	FALSE	1	1	1	1	1	1	1	1	1	1	1	1	1	1	1	1	1	1	1	1	1	1	1	1	1
CPI-SS0C875BA24	EFNA2_EPHA3	simple:O43921	simple:P29320	EFNA2	EPHA3	TRUE	FALSE	TRUE	curated	FALSE	1	1	1	1	1	1	1	1	1	1	1	1	1	1	1	1	1	1	1	1	1	1	1	1	1
CPI-SS09CA492BA	EFNA1_EPHA3	simple:P20827	simple:P29320	EFNA1	EPHA3	TRUE	FALSE	TRUE	curated	FALSE	1	1	1	1	1	1	1	1	1	1	1	1	1	1	1	1	1	1	1	1	1	1	1	1	1
CPI-SS0830C7910	EFNA2_EPHA8	simple:O43921	simple:P29322	EFNA2	EPHA8	FALSE	FALSE	TRUE	curated	FALSE	1	1	1	1	1	1	1	1	1	1	1	1	1	1	1	1	1	1	1	1	1	1	1	1	1
CPI-SS037E6BEDF	EFNA1_EPHA8	simple:P20827	simple:P29322	EFNA1	EPHA8	TRUE	FALSE	TRUE	curated	FALSE	1	1	1	1	1	1	1	1	1	1	1	1	1	1	1	1	1	1	1	1	1	1	1	1	1
CPI-SS0D81D9F5E	EFNA2_EPHA5	simple:O43921	simple:P54756	EFNA2	EPHA5	FALSE	FALSE	TRUE	curated	FALSE	1	1	1	1	1	1	1	1	1	1	1	1	1	1	1	1	1	1	1	1	1	1	1	1	1
CPI-SS0762B455F	EFNA1_EPHA5	simple:P20827	simple:P54756	EFNA1	EPHA5	TRUE	FALSE	TRUE	curated	FALSE	1	1	1	1	1	1	1	1	1	1	1	1	1	1	1	1	1	1	1	1	1	1	1	1	1
CPI-SS079EF5D9C	EFNA3_EPHA5	simple:P52797	simple:P54756	EFNA3	EPHA5	FALSE	FALSE	TRUE	curated	FALSE	1	1	1	1	1	1	1	1	1	1	1	1	1	1	1	1	1	1	1	1	1	1	1	1	1
CPI-SS0008137B6	EFNA4_EPHA5	simple:P52798	simple:P54756	EFNA4	EPHA5	TRUE	FALSE	TRUE	curated	FALSE	1	1	1	1	1	1	1	1	1	1	1	1	1	1	1	1	1	1	1	1	1	1	1	1	1
CPI-SS09E3F5044	EFNA5_EPHA5	simple:P52803	simple:P54756	EFNA5	EPHA5	FALSE	FALSE	TRUE	curated	FALSE	1	0	1	1	1	0	0	0	0	0	1	0	1	1	1	1	0	1	1	1	1	0	1	1	1
CPI-SC023986FB9	MSTN_TGFR_AVR2A	simple:O14793	complex:TGFR_AVR2A	MSTN		TRUE	FALSE	TRUE	curated	FALSE	1	1	1	1	1	1	1	1	1	1	1	1	1	1	1	1	1	1	1	1	1	1	1	1	1
CPI-SC08968AFE6	MSTN_TGFR_AVR2B	simple:O14793	complex:TGFR_AVR2B	MSTN		TRUE	FALSE	TRUE	curated	FALSE	1	1	1	1	1	1	1	1	1	1	1	1	1	1	1	1	1	1	1	1	1	1	1	1	1
CPI-SS073811AB3	TNFRSF11B_TNFSF11	simple:O00300	simple:O14788	TNFRSF11B	TNFSF11	TRUE	FALSE	TRUE	curated	FALSE	1	1	1	1	1	1	1	1	1	1	1	1	1	1	1	1	1	1	1	1	1	1	1	1	1
CPI-SC098C06330	TGFB1_TGFbeta receptor1	simple:P01137	complex:TGFbeta receptor1	TGFB1		TRUE	FALSE	TRUE	curated	FALSE	1	1	1	1	1	1	1	1	1	1	1	1	1	1	1	1	1	1	0	1	1	1	1	1	1
CPI-SC0D5CFA431	TGFB3_TGFbeta receptor1	simple:P10600	complex:TGFbeta receptor1	TGFB3		TRUE	FALSE	TRUE	curated	FALSE	1	1	1	1	1	1	1	1	1	1	1	1	1	1	1	1	1	1	1	1	1	1	1	1	1
CPI-SC03DD946B2	TGFB2_TGFbeta receptor1	simple:P61812	complex:TGFbeta receptor1	TGFB2		TRUE	FALSE	TRUE	curated	FALSE	1	1	1	1	1	1	1	1	1	1	1	1	1	1	1	1	1	1	1	1	1	1	1	1	1
CPI-SC0984894BC	TGFB1_TGFbeta receptor2	simple:P01137	complex:TGFbeta receptor2	TGFB1		TRUE	FALSE	TRUE	curated	FALSE	1	1	1	1	1	1	1	1	1	1	1	1	1	1	1	1	1	1	0	1	1	1	1	1	1
CPI-SC0077CEB82	TGFB3_TGFbeta receptor2	simple:P10600	complex:TGFbeta receptor2	TGFB3		TRUE	FALSE	TRUE	curated	FALSE	1	1	1	1	1	1	1	1	1	1	1	1	1	1	1	1	1	1	1	1	1	1	1	1	1
CPI-SC032246C72	TGFB2_TGFbeta receptor2	simple:P61812	complex:TGFbeta receptor2	TGFB2		TRUE	FALSE	TRUE	curated	FALSE	1	1	1	1	1	1	1	1	1	1	1	1	1	1	1	1	1	1	1	1	1	1	1	1	1
CPI-SS06CE0CF64	CORT_SSTR1	simple:O00230	simple:P30872	CORT	SSTR1	TRUE	FALSE	TRUE	guidetopharmacology.org	FALSE	1	1	1	1	1	1	1	1	1	1	1	1	1	1	1	1	1	1	1	1	1	1	1	1	1
CPI-SS00E5D7E39	CORT_GHSR	simple:O00230	simple:Q92847	CORT	GHSR	TRUE	FALSE	TRUE	I2D	FALSE	1	1	1	1	1	1	1	1	1	1	1	1	1	1	1	1	1	1	1	1	1	1	1	1	1
CPI-SS09CF5B145	AGRP_MC4R	simple:O00253	simple:P32245	AGRP	MC4R	TRUE	FALSE	TRUE	guidetopharmacology.org	FALSE	1	1	1	1	1	1	1	1	1	1	1	1	1	1	1	1	1	1	1	1	1	1	1	1	1
CPI-SS098F8DB82	POMC_MC4R	simple:P01189	simple:P32245	POMC	MC4R	TRUE	FALSE	TRUE	guidetopharmacology.org	FALSE	1	1	1	1	1	1	1	1	1	1	1	1	1	1	1	1	1	1	1	1	1	1	1	1	1
CPI-SS0CC136A8D	AGRP_MC5R	simple:O00253	simple:P33032	AGRP	MC5R	TRUE	FALSE	TRUE	guidetopharmacology.org	FALSE	1	1	1	1	1	1	1	1	1	1	1	1	1	1	1	1	1	1	1	1	1	1	1	1	1
CPI-SS0BE6DBE1A	POMC_MC5R	simple:P01189	simple:P33032	POMC	MC5R	TRUE	FALSE	TRUE	guidetopharmacology.org	FALSE	1	1	1	1	1	1	1	1	1	1	1	1	1	1	1	1	1	1	1	1	1	1	1	1	1
CPI-SS0C0E2C69C	POMC_MC2R	simple:P01189	simple:Q01718	POMC	MC2R	TRUE	FALSE	TRUE	I2D	FALSE	1	1	1	1	1	1	1	1	1	1	1	1	1	1	1	1	1	1	1	1	1	1	1	1	1
CPI-SS00BD8FF72	POMC_MC1R	simple:P01189	simple:Q01726	POMC	MC1R	TRUE	FALSE	TRUE	guidetopharmacology.org	FALSE	1	1	1	1	1	1	1	1	1	1	1	1	1	1	1	1	1	1	1	1	1	1	1	1	1
CPI-SS00F282936	CXCR6_CXCL16	simple:O00574	simple:Q9H2A7	CXCR6	CXCL16	TRUE	TRUE	TRUE	guidetopharmacology.org	FALSE	1	1	1	1	1	1	1	1	1	1	1	1	1	1	1	1	1	1	1	1	1	1	1	1	1
CPI-SS04318D03E	ACKR2_CCL3	simple:O00590	simple:P10147	ACKR2	CCL3	TRUE	TRUE	FALSE	curated	FALSE	1	1	1	1	1	1	1	1	1	1	1	1	1	1	1	1	1	1	1	1	1	1	1	1	1
CPI-SS0AFE077D8	ACKR2_CCL4	simple:O00590	simple:P13236	ACKR2	CCL4	TRUE	TRUE	FALSE	curated	FALSE	1	1	1	1	1	1	1	1	1	1	1	1	1	1	1	1	1	1	1	1	1	1	1	1	1
CPI-SS091B461CB	ACKR2_CCL28	simple:O00590	simple:Q9NRJ3	ACKR2	CCL28	TRUE	TRUE	FALSE	I2D	FALSE	1	1	1	1	1	1	1	1	1	1	1	1	1	1	1	1	1	1	1	1	1	1	1	1	1
CPI-SS064C772FE	CCR10_CCL28	simple:P46092	simple:Q9NRJ3	CCR10	CCL28	TRUE	TRUE	FALSE	guidetopharmacology.org	FALSE	1	1	1	1	1	1	1	1	1	1	1	1	1	1	1	1	1	1	1	1	1	1	1	1	1
CPI-SS0D57FCA8C	IDE_CCL23	simple:P14735	simple:P55773	IDE	CCL23	TRUE	TRUE	FALSE	InnateDB-All	FALSE	1	1	1	1	1	1	1	1	1	1	1	1	1	1	1	1	1	1	1	1	1	1	1	1	1
CPI-SS04B547174	OXT_OXTR	simple:P01178	simple:P30559	OXT	OXTR	TRUE	FALSE	TRUE	I2D	FALSE	1	1	1	1	1	1	1	1	1	1	1	1	1	1	1	1	1	1	1	1	1	1	1	1	1
CPI-SS032AD1183	NPPA_NPR1	simple:P01160	simple:P16066	NPPA	NPR1	TRUE	FALSE	TRUE	guidetopharmacology.org	FALSE	1	1	1	1	1	1	1	1	1	1	1	1	1	1	1	1	1	1	1	1	1	1	1	1	1
CPI-SS0E063192D	NRG2_ERBB4	simple:O14511	simple:Q15303	NRG2	ERBB4	TRUE	FALSE	TRUE	curated	FALSE	1	1	1	1	1	1	0	0	1	0	1	0	0	1	0	1	1	1	1	1	1	0	0	1	0
CPI-SS0F0D7F25C	BTC_ERBB4	simple:P35070	simple:Q15303	BTC	ERBB4	TRUE	FALSE	TRUE	curated	FALSE	1	1	1	1	1	1	1	1	1	1	1	1	1	1	1	1	1	1	1	1	1	1	1	1	1
CPI-SS0D5E30C6C	NRG3_ERBB4	simple:P56975	simple:Q15303	NRG3	ERBB4	TRUE	FALSE	TRUE	curated	FALSE	1	1	1	1	1	0	0	0	0	0	1	1	1	1	1	1	1	1	1	1	1	1	1	1	1
CPI-SS0BD5C2A23	NRG1_ERBB4	simple:Q02297	simple:Q15303	NRG1	ERBB4	TRUE	TRUE	TRUE	curated	FALSE	1	1	1	1	1	0	0	0	0	0	1	1	1	1	1	1	1	1	1	1	1	1	1	1	1
CPI-SC0E5218AA4	NRG1_a6b4 complex	simple:Q02297	complex:a6b4 complex	NRG1		TRUE	TRUE	FALSE	curated	TRUE	1	1	1	1	1	1	1	1	1	1	1	1	1	1	1	1	1	1	1	1	1	1	1	1	1
CPI-SC0A68C5F13	IGF1_a6b4 complex	simple:P05019	complex:a6b4 complex	IGF1		TRUE	FALSE	FALSE	curated	TRUE	1	1	1	1	1	1	1	1	1	1	1	1	1	1	1	1	1	1	1	1	1	1	1	1	1
CPI-SS0708FE6FF	NRG1_LSR	simple:Q02297	simple:Q86X29	NRG1	LSR	TRUE	TRUE	TRUE	InnateDB-All	FALSE	1	1	1	1	1	1	1	1	1	1	1	1	1	1	1	1	1	1	1	1	1	1	1	1	1
CPI-SS0E075E5AF	NRG1_NETO2	simple:Q02297	simple:Q8NC67	NRG1	NETO2	TRUE	TRUE	TRUE	InnateDB-All	FALSE	1	1	1	1	1	1	0	1	1	0	1	1	1	1	1	1	1	1	1	1	1	1	1	1	1
CPI-SS02572E1EF	NRG1_LGR4	simple:Q02297	simple:Q9BXB1	NRG1	LGR4	TRUE	TRUE	TRUE	InnateDB-All	FALSE	1	1	1	1	1	0	0	0	1	0	1	1	1	1	1	1	1	1	1	1	1	1	1	1	1
CPI-SS034D3988F	RSPO4_LGR4	simple:Q2I0M5	simple:Q9BXB1	RSPO4	LGR4	TRUE	FALSE	TRUE	guidetopharmacology.org	FALSE	1	1	1	1	1	1	1	1	1	1	1	1	1	1	1	1	1	1	1	1	1	1	1	1	1
CPI-SS0057AB387	RSPO1_LGR4	simple:Q2MKA7	simple:Q9BXB1	RSPO1	LGR4	TRUE	FALSE	TRUE	guidetopharmacology.org	FALSE	1	1	1	1	1	1	1	1	1	1	1	1	1	1	1	1	1	1	1	1	1	1	1	1	1
CPI-SS01E3453DB	RSPO2_LGR4	simple:Q6UXX9	simple:Q9BXB1	RSPO2	LGR4	TRUE	FALSE	TRUE	guidetopharmacology.org	FALSE	1	1	1	1	1	1	1	1	1	1	1	1	1	1	1	1	1	1	1	1	1	1	1	1	1
CPI-SS0609FCF76	RSPO4_LGR6	simple:Q2I0M5	simple:Q9HBX8	RSPO4	LGR6	TRUE	FALSE	TRUE	guidetopharmacology.org	FALSE	1	1	1	1	1	1	1	1	1	1	1	1	1	1	1	1	1	1	1	1	1	1	1	1	1
CPI-SS0E5397537	RSPO1_LGR6	simple:Q2MKA7	simple:Q9HBX8	RSPO1	LGR6	TRUE	FALSE	TRUE	guidetopharmacology.org	FALSE	1	1	1	1	1	1	1	1	1	1	1	1	1	1	1	1	1	1	1	1	1	1	1	1	1
CPI-SS019104E2E	RSPO2_LGR6	simple:Q6UXX9	simple:Q9HBX8	RSPO2	LGR6	TRUE	FALSE	TRUE	guidetopharmacology.org	FALSE	1	1	1	1	1	1	1	1	1	1	1	1	1	1	1	1	1	1	1	1	1	1	1	1	1
CPI-SS0EB5364D4	RSPO3_LGR6	simple:Q9BXY4	simple:Q9HBX8	RSPO3	LGR6	TRUE	FALSE	TRUE	guidetopharmacology.org	FALSE	1	1	1	1	1	1	1	0	1	1	1	1	1	1	1	1	1	1	1	1	1	1	1	1	1
CPI-SS0ED2573CA	TNFSF11_TNFRSF11A	simple:O14788	simple:Q9Y6Q6	TNFSF11	TNFRSF11A	TRUE	TRUE	TRUE	curated	FALSE	1	1	1	1	1	1	1	1	1	1	1	1	1	1	1	1	1	1	1	1	1	1	1	1	1
CPI-SS06A999D25	PLD2_ARF1	simple:O14939	simple:P84077	PLD2	ARF1	FALSE	FALSE	FALSE	guidetopharmacology.org	FALSE	1	1	1	1	1	1	1	1	1	1	1	0	1	1	1	1	1	1	1	1	1	1	1	1	1
CPI-SS0F3A089DE	SEMA3E_PLXND1	simple:O15041	simple:Q9Y4D7	SEMA3E	PLXND1	TRUE	FALSE	TRUE	curated	FALSE	1	1	1	1	1	1	1	1	1	1	1	1	1	1	1	1	1	1	1	1	1	1	1	1	1
CPI-SS044C72D0D	SEMA4A_PLXND1	simple:Q9H3S1	simple:Q9Y4D7	SEMA4A	PLXND1	FALSE	FALSE	TRUE	curated	FALSE	1	1	1	1	1	1	1	1	1	1	1	1	1	1	1	1	1	1	1	1	1	1	1	1	1
CPI-SS0BAB460FF	ANGPT2_TEK	simple:O15123	simple:Q02763	ANGPT2	TEK	TRUE	FALSE	TRUE	curated	FALSE	1	1	1	1	1	1	0	1	1	1	1	1	1	1	1	1	1	1	1	1	1	0	1	1	1
CPI-SS090FC28E1	EPHB6_EFNB2	simple:O15197	simple:P52799	EPHB6	EFNB2	TRUE	TRUE	TRUE	curated	FALSE	1	1	1	1	1	1	0	1	1	1	1	1	1	1	1	1	1	1	1	1	1	1	1	1	1
CPI-SS04124F4E1	EPO_EFNB2	simple:P01588	simple:P52799	EPO	EFNB2	TRUE	FALSE	TRUE	IMEx,IntAct	FALSE	1	1	1	1	1	1	1	1	1	1	1	1	1	1	1	1	1	1	1	1	1	1	1	1	1
CPI-SS0B9E8C0DE	EPHB2_EFNB2	simple:P29323	simple:P52799	EPHB2	EFNB2	FALSE	TRUE	TRUE	curated	FALSE	1	1	1	1	1	1	0	1	1	1	1	1	1	1	1	1	1	1	1	1	1	1	1	1	1
CPI-SS0DC4D593E	EPHB6_EFNB1	simple:O15197	simple:P98172	EPHB6	EFNB1	TRUE	TRUE	FALSE	curated	FALSE	1	1	1	1	1	1	1	1	1	1	1	1	1	1	1	1	1	1	1	1	1	1	1	1	1
CPI-SS0111AAD26	EPHB2_EFNB1	simple:P29323	simple:P98172	EPHB2	EFNB1	FALSE	TRUE	FALSE	curated	FALSE	1	1	1	1	1	1	1	1	1	1	1	1	1	1	1	1	1	1	1	1	1	1	1	1	1
CPI-SS0FF55B42C	EPHB3_EFNB1	simple:P54753	simple:P98172	EPHB3	EFNB1	FALSE	TRUE	FALSE	curated	FALSE	1	1	1	1	1	1	1	1	1	1	1	1	1	1	1	1	1	1	1	1	1	1	1	1	1
CPI-SS0F21D6CA0	EPHB4_EFNB1	simple:P54760	simple:P98172	EPHB4	EFNB1	FALSE	TRUE	FALSE	curated	FALSE	1	1	1	1	1	1	1	1	1	1	1	1	1	1	1	1	1	1	1	1	1	1	1	1	1
CPI-SS0470AF83E	EPHB1_EFNB1	simple:P54762	simple:P98172	EPHB1	EFNB1	FALSE	TRUE	FALSE	curated	FALSE	1	1	1	1	1	1	1	1	1	1	1	1	1	1	1	1	1	1	1	1	1	1	1	1	1
CPI-SS00046DCF3	EPHA4_EFNB1	simple:P54764	simple:P98172	EPHA4	EFNB1	FALSE	TRUE	FALSE	curated	FALSE	1	1	1	1	1	1	1	1	1	1	1	1	1	1	1	1	1	1	1	1	1	1	1	1	1
CPI-SS08718E4FB	EPHB6_EFNB3	simple:O15197	simple:Q15768	EPHB6	EFNB3	TRUE	TRUE	TRUE	curated	FALSE	1	1	1	1	1	0	1	1	1	1	1	1	1	1	1	1	1	1	1	1	1	1	1	1	1
CPI-SS0DA366C78	EPHB2_EFNB3	simple:P29323	simple:Q15768	EPHB2	EFNB3	FALSE	TRUE	TRUE	curated	FALSE	1	1	1	1	1	0	1	1	1	1	1	1	1	1	1	1	1	1	1	1	1	1	1	1	1
CPI-SS0A5B945E3	EPHB3_EFNB3	simple:P54753	simple:Q15768	EPHB3	EFNB3	FALSE	TRUE	TRUE	curated	FALSE	1	1	1	1	1	1	1	1	1	1	1	1	1	1	1	1	1	1	1	1	1	1	1	1	1
CPI-SS0865716E5	EPHB4_EFNB3	simple:P54760	simple:Q15768	EPHB4	EFNB3	FALSE	TRUE	TRUE	curated	FALSE	1	1	1	1	1	1	1	1	1	1	1	1	1	1	1	1	1	1	1	1	1	1	1	1	1
CPI-SS0D41C7AF5	EPHB1_EFNB3	simple:P54762	simple:Q15768	EPHB1	EFNB3	FALSE	TRUE	TRUE	curated	FALSE	0	1	1	1	1	0	1	1	1	1	1	1	1	1	1	1	1	1	1	1	1	1	1	1	1
CPI-SS07CA5A6F1	EPHA4_EFNB3	simple:P54764	simple:Q15768	EPHA4	EFNB3	FALSE	TRUE	TRUE	curated	FALSE	1	1	1	1	1	0	1	1	1	1	0	1	1	1	1	1	1	1	1	1	1	1	1	1	1
CPI-SS087A17AD6	EPO_EPOR	simple:P01588	simple:P19235	EPO	EPOR	TRUE	FALSE	TRUE	curated	FALSE	1	1	1	1	1	1	1	1	1	1	1	1	1	1	1	1	1	1	1	1	1	1	1	1	1
CPI-SS0A0DE9CD6	EPO_EPHB4	simple:P01588	simple:P54760	EPO	EPHB4	TRUE	FALSE	TRUE	IMEx,InnateDB-All,IntAct	FALSE	1	1	1	1	1	1	1	1	1	1	1	1	1	1	1	1	1	1	1	1	1	1	1	1	1
CPI-SS08D0F9109	EFNB2_EPHB4	simple:P52799	simple:P54760	EFNB2	EPHB4	FALSE	TRUE	TRUE	curated	FALSE	1	1	1	1	1	1	1	1	1	1	1	1	1	1	1	1	1	1	1	1	1	1	1	1	1
CPI-SS0586F2596	EPHB2_EFNA5	simple:P29323	simple:P52803	EPHB2	EFNA5	FALSE	TRUE	FALSE	curated	FALSE	1	1	1	1	1	1	0	1	1	1	1	1	1	1	1	1	1	1	1	1	1	0	1	1	1
CPI-SS03A2EFDD5	EPHA1_EFNA5	simple:P21709	simple:P52803	EPHA1	EFNA5	FALSE	TRUE	FALSE	curated	FALSE	1	1	1	1	1	1	1	1	1	1	1	1	1	1	1	1	1	1	1	1	1	1	1	1	1
CPI-SS02AFCED82	EPHA2_EFNA5	simple:P29317	simple:P52803	EPHA2	EFNA5	FALSE	TRUE	FALSE	curated	FALSE	1	1	1	1	1	1	1	1	1	1	1	1	1	1	1	1	1	1	1	1	1	1	1	1	1
CPI-SS0BEAB521F	EPHA3_EFNA5	simple:P29320	simple:P52803	EPHA3	EFNA5	TRUE	TRUE	FALSE	curated	FALSE	1	1	1	1	1	1	0	1	1	1	1	1	1	1	1	1	1	1	1	1	1	1	1	1	1
CPI-SS012CCE326	EPHA8_EFNA5	simple:P29322	simple:P52803	EPHA8	EFNA5	FALSE	TRUE	FALSE	curated	FALSE	1	1	1	1	1	1	1	1	1	1	1	1	1	1	1	1	1	1	1	1	1	1	1	1	1
CPI-SS082ABF1EA	EFNB2_EPHB3	simple:P52799	simple:P54753	EFNB2	EPHB3	FALSE	TRUE	TRUE	curated	FALSE	1	1	1	1	1	1	1	1	1	1	1	1	1	1	1	1	1	1	1	1	1	1	1	1	1
CPI-SS0BFD8E056	EFNB2_EPHB1	simple:P52799	simple:P54762	EFNB2	EPHB1	FALSE	TRUE	TRUE	curated	FALSE	1	1	1	1	1	0	0	1	1	1	1	1	1	1	1	1	1	1	1	1	1	1	1	1	1
CPI-SS01A8F745A	EPHA1_EFNA3	simple:P21709	simple:P52797	EPHA1	EFNA3	FALSE	TRUE	FALSE	curated	FALSE	1	1	1	1	1	1	1	1	1	1	1	1	1	1	1	1	1	1	1	1	1	1	1	1	1
CPI-SS07BECB892	EPHA2_EFNA3	simple:P29317	simple:P52797	EPHA2	EFNA3	FALSE	TRUE	FALSE	curated	FALSE	1	1	1	1	1	1	1	1	1	1	1	1	1	1	1	1	1	1	1	1	1	1	1	1	1
CPI-SS0AB0604B5	EPHA3_EFNA3	simple:P29320	simple:P52797	EPHA3	EFNA3	TRUE	TRUE	FALSE	curated	FALSE	1	1	1	1	1	1	1	1	1	1	1	1	1	1	1	1	1	1	1	1	1	1	1	1	1
CPI-SS0DF162C10	EPHA8_EFNA3	simple:P29322	simple:P52797	EPHA8	EFNA3	FALSE	TRUE	FALSE	curated	FALSE	1	1	1	1	1	1	1	1	1	1	1	1	1	1	1	1	1	1	1	1	1	1	1	1	1
CPI-SS05E6D620E	EPHA1_EFNA4	simple:P21709	simple:P52798	EPHA1	EFNA4	TRUE	TRUE	FALSE	curated	FALSE	1	1	1	1	1	1	1	1	1	1	1	1	1	1	1	1	1	1	1	1	1	1	1	1	1
CPI-SS09F973C1A	EPHA2_EFNA4	simple:P29317	simple:P52798	EPHA2	EFNA4	TRUE	TRUE	FALSE	curated	FALSE	1	1	1	1	1	1	1	1	1	1	1	1	1	1	1	1	1	1	1	1	1	1	1	1	1
CPI-SS041888D39	EPHA3_EFNA4	simple:P29320	simple:P52798	EPHA3	EFNA4	TRUE	TRUE	FALSE	curated	FALSE	1	1	1	1	1	1	1	1	1	1	1	1	1	1	1	1	1	1	1	1	1	1	1	1	1
CPI-SS02B285B4D	EPHA8_EFNA4	simple:P29322	simple:P52798	EPHA8	EFNA4	TRUE	TRUE	FALSE	curated	FALSE	1	1	1	1	1	1	1	1	1	1	1	1	1	1	1	1	1	1	1	1	1	1	1	1	1
CPI-SS04C396C5D	VGF_NTRK1	simple:O15240	simple:P04629	VGF	NTRK1	TRUE	FALSE	TRUE	InnateDB-All	FALSE	1	1	1	1	1	1	1	1	1	1	1	1	1	1	1	1	1	1	1	1	1	1	1	1	1
CPI-SS052127A00	NGF_NTRK1	simple:P01138	simple:P04629	NGF	NTRK1	TRUE	FALSE	TRUE	curated	FALSE	1	1	1	1	1	1	1	1	1	1	1	1	1	1	1	1	1	1	1	1	1	1	1	1	1
CPI-SS0EDD4928A	NGF_NGFR	simple:P01138	simple:P08138	NGF	NGFR	TRUE	FALSE	TRUE	curated	FALSE	1	1	1	1	1	1	1	1	1	1	1	1	1	1	1	1	1	1	1	1	1	1	1	1	1
CPI-SS0AB647854	GPR37_PSAP	simple:O15354	simple:P07602	GPR37	PSAP	TRUE	TRUE	FALSE	guidetopharmacology.org	FALSE	1	0	0	1	0	1	1	1	1	1	1	0	1	1	1	1	1	1	1	1	1	1	1	1	1
CPI-SS082900482	GPR37L1_PSAP	simple:O60883	simple:P07602	GPR37L1	PSAP	TRUE	TRUE	FALSE	guidetopharmacology.org	FALSE	1	1	1	1	1	1	1	1	1	1	0	0	0	0	0	1	1	1	1	1	1	0	0	0	0
CPI-SS0A915097A	GRIN2D_IL16	simple:O15399	simple:Q14005	GRIN2D	IL16	TRUE	TRUE	FALSE	I2D	FALSE	1	1	1	1	1	1	1	1	1	1	1	1	1	1	1	1	1	1	1	1	1	1	1	1	1
CPI-SS070B0E458	GRIN2A_IL16	simple:Q12879	simple:Q14005	GRIN2A	IL16	TRUE	TRUE	FALSE	I2D	FALSE	1	1	1	1	1	1	1	1	1	1	1	1	1	1	1	1	1	1	1	1	1	1	1	1	1
CPI-SS0D529E576	GRIN2B_IL16	simple:Q13224	simple:Q14005	GRIN2B	IL16	TRUE	TRUE	FALSE	I2D	FALSE	1	1	1	1	1	1	1	1	1	1	1	1	1	1	1	1	1	1	1	1	1	1	1	1	1
CPI-SS086615F9B	CSF1_CELSR3	simple:P09603	simple:Q9NYQ7	CSF1	CELSR3	TRUE	FALSE	TRUE	I2D	FALSE	1	0	1	1	1	1	1	1	1	1	1	1	1	1	1	1	1	1	1	1	1	1	1	1	1
CPI-SS04861AD1A	FGFR4_SCGB3A1	simple:P22455	simple:Q96QR1	FGFR4	SCGB3A1	TRUE	TRUE	FALSE	IMEx,InnateDB-All,MINT	FALSE	1	1	1	1	1	1	1	1	1	1	1	1	1	1	1	1	1	1	1	1	1	1	1	1	1
CPI-SS042EB8C7A	TBXA2R_GHRL	simple:P21731	simple:Q9UBU3	TBXA2R	GHRL	TRUE	TRUE	FALSE	InnateDB-All	FALSE	1	1	1	1	1	1	1	1	1	1	1	1	1	1	1	1	1	1	1	1	1	1	1	1	1
CPI-SS043E0F61D	PTGER3_GHRL	simple:P43115	simple:Q9UBU3	PTGER3	GHRL	TRUE	TRUE	FALSE	InnateDB-All	FALSE	1	1	1	1	1	1	1	1	1	1	1	1	1	1	1	1	1	1	1	1	1	1	1	1	1
CPI-SS07D40A3F3	GHSR_GHRL	simple:Q92847	simple:Q9UBU3	GHSR	GHRL	TRUE	TRUE	FALSE	guidetopharmacology.org	FALSE	1	1	1	1	1	1	1	1	1	1	1	1	1	1	1	1	1	1	1	1	1	1	1	1	1
CPI-SS085C150CE	ACE2_GHRL	simple:Q9BYF1	simple:Q9UBU3	ACE2	GHRL	TRUE	TRUE	FALSE	I2D	FALSE	1	1	1	1	1	1	1	1	1	1	1	1	1	1	1	1	1	1	1	1	1	1	1	1	1
CPI-SS0EB3C2743	GHSR_LEAP2	simple:Q92847	simple:Q969E1	GHSR	LEAP2	TRUE	TRUE	FALSE	guidetopharmacology.org	FALSE	1	1	1	1	1	1	1	1	1	1	1	1	1	1	1	1	1	1	1	1	1	1	1	1	1
CPI-SS079DDF890	TNFSF12_TNFRSF25	simple:O43508	simple:Q93038	TNFSF12	TNFRSF25	TRUE	FALSE	TRUE	I2D	FALSE	1	1	1	1	1	1	1	1	1	1	1	1	1	1	1	1	1	1	1	1	1	1	1	1	1
CPI-SS0B0CF0EDF	TNFSF15_TNFRSF25	simple:O95150	simple:Q93038	TNFSF15	TNFRSF25	TRUE	FALSE	TRUE	guidetopharmacology.org	FALSE	1	1	1	1	1	1	1	1	1	1	1	1	1	1	1	1	1	1	1	1	1	1	1	1	1
CPI-SS0D9EFC4F7	GNRH1_GNRHR	simple:P01148	simple:P30968	GNRH1	GNRHR	TRUE	FALSE	TRUE	I2D	FALSE	1	1	1	1	1	1	1	1	1	1	1	1	1	1	1	1	1	1	1	1	1	1	1	1	1
CPI-SS08A819670	CD70_GPRC5B	simple:P32970	simple:Q9NZH0	CD70	GPRC5B	TRUE	FALSE	TRUE	InnateDB-All	FALSE	1	1	1	1	1	1	1	1	1	1	1	1	1	1	1	1	1	1	1	1	1	1	1	1	1
CPI-SS084816B12	HCRT_HCRTR1	simple:O43612	simple:O43613	HCRT	HCRTR1	TRUE	FALSE	TRUE	guidetopharmacology.org	FALSE	1	1	1	1	1	1	1	1	1	1	1	1	1	1	1	1	1	1	1	1	1	1	1	1	1
CPI-SS02461AE98	HCRT_HCRTR2	simple:O43612	simple:O43614	HCRT	HCRTR2	TRUE	FALSE	TRUE	guidetopharmacology.org	FALSE	1	1	1	1	1	1	1	1	1	1	1	1	1	1	1	1	1	1	1	1	1	1	1	1	1
CPI-SS0B9B3870A	VEGFA_FLT1	simple:P15692	simple:P17948	VEGFA	FLT1	TRUE	FALSE	TRUE	curated	FALSE	1	1	1	1	1	1	1	1	1	1	1	1	1	1	1	1	1	1	1	1	1	1	1	1	1
CPI-SS02371A6D6	VEGFA_EPHB2	simple:P15692	simple:P29323	VEGFA	EPHB2	TRUE	FALSE	TRUE	I2D	FALSE	1	1	1	1	1	1	0	1	1	1	1	0	1	1	0	1	1	1	1	1	1	0	1	1	1
CPI-SS0C694CB44	VEGFA_GRIN2B	simple:P15692	simple:Q13224	VEGFA	GRIN2B	TRUE	FALSE	TRUE	I2D	FALSE	1	1	1	1	1	1	0	1	1	1	1	0	1	1	1	1	1	1	1	1	1	0	1	1	1
CPI-SS082AD7B6A	FZD6_WNT5A	simple:O60353	simple:P41221	FZD6	WNT5A	TRUE	TRUE	FALSE	curated	FALSE	1	1	1	1	1	1	1	1	1	1	1	1	1	1	1	1	1	1	1	1	1	1	1	1	1
CPI-SC0FDB4B6D9	GDF9_TGFR_BMPR2	simple:O60383	complex:TGFR_BMPR2	GDF9		TRUE	FALSE	TRUE	curated	FALSE	1	1	1	1	1	1	1	1	1	1	1	1	1	1	1	1	1	1	1	1	1	1	1	1	1
CPI-SS02B567BC7	PLXNC1_SEMA7A	simple:O60486	simple:O75326	PLXNC1	SEMA7A	FALSE	TRUE	FALSE	curated	FALSE	1	1	1	1	1	1	0	1	1	1	1	1	1	1	1	1	1	1	1	1	1	0	1	1	1
CPI-SS070C51D94	FZD7_WNT3	simple:O75084	simple:P56703	FZD7	WNT3	TRUE	TRUE	FALSE	curated	FALSE	1	1	1	1	1	1	1	1	1	1	1	1	1	1	1	1	1	1	1	1	1	1	1	1	1
CPI-SS0A4EE6FE1	LRP5_FAM3B	simple:O75197	simple:P58499	LRP5	FAM3B	TRUE	TRUE	FALSE	InnateDB-All	FALSE	1	1	1	1	1	1	1	1	1	1	1	1	1	1	1	1	1	1	1	1	1	1	1	1	1
CPI-SS05E001125	LGR5_RSPO4	simple:O75473	simple:Q2I0M5	LGR5	RSPO4	TRUE	TRUE	FALSE	guidetopharmacology.org	FALSE	1	1	1	1	1	1	1	1	1	1	1	1	1	1	1	1	1	1	1	1	1	1	1	1	1
CPI-SS0F102AAC5	LGR5_RSPO1	simple:O75473	simple:Q2MKA7	LGR5	RSPO1	TRUE	TRUE	FALSE	guidetopharmacology.org	FALSE	1	1	1	1	1	1	1	1	1	1	1	1	1	1	1	1	1	1	1	1	1	1	1	1	1
CPI-SS0FC0CA5ED	LGR5_RSPO2	simple:O75473	simple:Q6UXX9	LGR5	RSPO2	TRUE	TRUE	FALSE	guidetopharmacology.org	FALSE	1	1	1	1	1	1	1	1	1	1	1	1	1	1	1	1	1	1	1	1	1	1	1	1	1
CPI-SS0DCA749B0	LGR5_RSPO3	simple:O75473	simple:Q9BXY4	LGR5	RSPO3	TRUE	TRUE	FALSE	guidetopharmacology.org	FALSE	1	1	1	1	1	1	0	1	1	1	1	1	1	1	1	1	1	1	1	1	1	1	1	1	1
CPI-SS0A874F65F	LGR4_RSPO3	simple:Q9BXB1	simple:Q9BXY4	LGR4	RSPO3	TRUE	TRUE	FALSE	guidetopharmacology.org	FALSE	1	1	1	1	1	1	0	1	1	1	1	0	1	1	1	1	1	1	1	1	1	1	1	1	1
CPI-SS05B1FA8A8	LRP6_CKLF	simple:O75581	simple:Q9UBR5	LRP6	CKLF	TRUE	TRUE	FALSE	IMEx,IntAct	FALSE	1	1	1	1	1	1	1	1	1	1	1	1	1	1	1	1	1	1	1	1	1	1	1	1	1
CPI-SS05162C56B	NTF3_NTRK3	simple:P20783	simple:Q16288	NTF3	NTRK3	TRUE	FALSE	TRUE	curated	FALSE	1	1	1	1	1	1	1	1	1	1	1	1	1	1	1	1	1	1	1	1	1	1	1	1	1
CPI-SS065F7DA2A	COPA_P2RY6	simple:P53621	simple:Q15077	COPA	P2RY6	TRUE	FALSE	TRUE	IMEx,IntAct	FALSE	1	1	1	0	1	1	1	1	0	1	1	1	1	0	1	1	1	1	0	1	1	1	1	0	1
CPI-SS09A3FA737	NAMPT_P2RY6	simple:P43490	simple:Q15077	NAMPT	P2RY6	TRUE	FALSE	TRUE	IMEx,IntAct	FALSE	1	1	1	1	1	1	1	1	0	1	1	1	1	1	1	1	1	1	1	1	1	1	1	1	1
CPI-SS0BE567EFB	GAL_GALR1	simple:P22466	simple:P47211	GAL	GALR1	TRUE	FALSE	TRUE	guidetopharmacology.org	FALSE	1	1	1	1	1	1	1	1	1	1	1	1	1	1	1	1	1	1	1	1	1	1	1	1	1
CPI-SS03E48EFEA	C3_C3AR1	simple:P01024	simple:Q16581	C3	C3AR1	TRUE	FALSE	TRUE	guidetopharmacology.org	FALSE	1	1	1	1	1	1	1	1	1	1	1	1	1	1	1	1	1	1	1	1	1	1	1	1	1
CPI-SS03E273233	ADORA2A_ENTPD1	simple:P29274	simple:P49961	ADORA2A	ENTPD1	FALSE	TRUE	FALSE	curated	FALSE	1	1	1	1	1	1	1	1	1	1	1	1	1	1	1	1	1	1	1	1	1	1	1	1	1
CPI-SS0FF6CFDCA	ADORA3_ENTPD1	simple:P0DMS8	simple:P49961	ADORA3	ENTPD1	FALSE	TRUE	FALSE	curated	FALSE	1	1	1	1	1	1	1	1	1	1	1	1	1	1	1	1	1	1	1	1	1	1	1	1	1
CPI-SS079728E8B	ADORA2B_ENTPD1	simple:P29275	simple:P49961	ADORA2B	ENTPD1	FALSE	TRUE	FALSE	curated	FALSE	1	1	1	1	1	1	1	1	1	1	1	1	1	1	1	1	1	1	1	1	1	1	1	1	1
CPI-SS03E7587E4	ADORA1_ENTPD1	simple:P30542	simple:P49961	ADORA1	ENTPD1	FALSE	TRUE	FALSE	curated	FALSE	1	1	1	0	0	1	1	1	0	0	1	1	1	0	0	1	1	1	1	1	1	1	1	0	0
CPI-SS05996C8FD	AGT_AGTR1	simple:P01019	simple:P30556	AGT	AGTR1	TRUE	FALSE	TRUE	guidetopharmacology.org	FALSE	1	1	1	1	1	1	1	1	1	1	1	1	1	1	1	1	1	1	1	1	1	1	1	1	1
CPI-SS069924427	AGT_AGTR2	simple:P01019	simple:P50052	AGT	AGTR2	TRUE	FALSE	TRUE	guidetopharmacology.org	FALSE	1	1	1	1	1	1	1	1	1	1	1	1	1	1	1	1	1	1	1	1	1	1	1	1	1
CPI-SS00581282E	C5_C5AR1	simple:P01031	simple:P21730	C5	C5AR1	TRUE	FALSE	TRUE	guidetopharmacology.org	FALSE	1	1	1	1	1	1	1	1	1	1	1	1	1	1	1	1	1	1	1	1	1	1	1	1	1
CPI-SS0A7E3A1AF	C5_C5AR2	simple:P01031	simple:Q9P296	C5	C5AR2	TRUE	FALSE	TRUE	guidetopharmacology.org	FALSE	1	1	1	1	1	1	1	1	1	1	1	1	1	1	1	1	1	1	1	1	1	1	1	1	1
CPI-SS075D9B9AD	KNG1_BDKRB1	simple:P01042	simple:P46663	KNG1	BDKRB1	TRUE	FALSE	TRUE	guidetopharmacology.org	FALSE	1	1	1	1	1	1	1	1	1	1	1	1	1	1	1	1	1	1	1	1	1	1	1	1	1
CPI-SS0C7833961	TSHB_TSHR	simple:P01222	simple:P16473	TSHB	TSHR	TRUE	FALSE	TRUE	I2D	FALSE	1	1	1	1	1	1	1	1	1	1	1	1	1	1	1	1	1	1	1	1	1	1	1	1	1
CPI-SS01963C4CA	TG_ASGR1	simple:P01266	simple:P07306	TG	ASGR1	TRUE	FALSE	TRUE	I2D	FALSE	1	1	1	1	1	1	1	1	1	1	1	1	1	1	1	1	1	1	1	1	1	1	1	1	1
CPI-SS012B216F6	PTHLH_PTH2R	simple:P12272	simple:P49190	PTHLH	PTH2R	TRUE	FALSE	TRUE	guidetopharmacology.org	FALSE	1	1	1	1	1	1	1	1	1	1	1	1	1	1	1	1	1	1	1	1	1	1	1	1	1
CPI-SS0483CE4ED	PTHLH_PTH1R	simple:P12272	simple:Q03431	PTHLH	PTH1R	TRUE	FALSE	TRUE	guidetopharmacology.org	FALSE	1	1	1	1	1	1	1	1	1	1	1	1	1	1	1	1	1	1	1	1	1	1	1	1	1
CPI-SS0F739D3DB	ANXA1_FPR1	simple:P04083	simple:P21462	ANXA1	FPR1	TRUE	FALSE	TRUE	guidetopharmacology.org	FALSE	1	1	1	1	1	1	1	1	1	1	1	1	1	1	1	1	1	1	1	1	1	1	1	1	1
CPI-SS030BB46BB	ANXA1_FPR2	simple:P04083	simple:P25090	ANXA1	FPR2	TRUE	FALSE	TRUE	curated	FALSE	1	1	1	1	1	1	1	1	1	1	1	1	1	1	1	1	1	1	1	1	1	1	1	1	1
CPI-SS0F66EA6BE	APP_FPR2	simple:P05067	simple:P25090	APP	FPR2	FALSE	FALSE	TRUE	guidetopharmacology.org	FALSE	1	1	1	1	1	1	1	1	1	1	1	1	1	1	1	1	1	1	1	1	1	1	1	1	1
CPI-SS0D3A5646A	RLN1_RXFP2	simple:P04808	simple:Q8WXD0	RLN1	RXFP2	TRUE	FALSE	TRUE	guidetopharmacology.org	FALSE	1	1	1	1	1	1	1	1	1	1	1	1	1	1	1	1	1	1	1	1	1	1	1	1	1
CPI-SS0FAE75A75	RLN1_RXFP1	simple:P04808	simple:Q9HBX9	RLN1	RXFP1	TRUE	FALSE	TRUE	guidetopharmacology.org	FALSE	1	1	1	1	1	1	1	1	1	1	1	1	1	1	1	1	1	1	1	1	1	1	1	1	1
CPI-SS0431D2256	TNFSF9_TNFRSF9	simple:P41273	simple:Q07011	TNFSF9	TNFRSF9	TRUE	FALSE	TRUE	curated	FALSE	1	1	1	1	1	1	1	1	1	1	1	1	1	1	1	1	1	1	1	1	1	1	1	1	1
CPI-SS0DC2A6D35	IL6_HRH1	simple:P05231	simple:P35367	IL6	HRH1	TRUE	FALSE	TRUE	IMEx,InnateDB-All,IntAct	FALSE	1	1	1	1	1	1	1	1	1	1	1	1	1	1	1	1	1	1	1	1	1	1	1	1	1
CPI-SS0A05319F5	CRH_CRHR2	simple:P06850	simple:Q13324	CRH	CRHR2	TRUE	FALSE	TRUE	I2D,InnateDB-All	FALSE	1	1	1	1	1	1	1	1	1	1	1	1	1	1	1	1	1	1	1	1	1	1	1	1	1
CPI-SS0E654708F	UCN_CRHR2	simple:P55089	simple:Q13324	UCN	CRHR2	TRUE	FALSE	TRUE	guidetopharmacology.org	FALSE	1	1	1	1	1	1	1	1	1	1	1	1	1	1	1	1	1	1	1	1	1	1	1	1	1
CPI-SS0C85BC9AF	PROS1_AXL	simple:P07225	simple:P30530	PROS1	AXL	TRUE	FALSE	TRUE	guidetopharmacology.org	FALSE	1	1	1	1	1	1	1	1	1	1	1	1	1	1	1	1	1	0	1	1	1	1	1	1	1
CPI-SS09C4988F8	PROS1_TYRO3	simple:P07225	simple:Q06418	PROS1	TYRO3	TRUE	FALSE	TRUE	guidetopharmacology.org	FALSE	1	1	1	1	1	1	1	1	1	1	1	1	1	1	1	0	0	1	1	1	1	1	1	1	1
CPI-SS0B01CF3AB	CSF1R_CSF1	simple:P07333	simple:P09603	CSF1R	CSF1	TRUE	TRUE	FALSE	curated	FALSE	1	1	1	1	1	1	1	1	1	1	1	1	1	1	1	0	1	1	1	1	1	1	1	1	1
CPI-SS0DFA98A14	CSF1R_IL34	simple:P07333	simple:Q6ZMJ4	CSF1R	IL34	TRUE	TRUE	FALSE	curated	FALSE	1	1	1	1	1	1	1	1	1	1	1	1	1	1	1	1	1	1	1	1	1	1	1	1	1
CPI-SS07AF9303D	GRP_GRPR	simple:P07492	simple:P30550	GRP	GRPR	TRUE	FALSE	TRUE	guidetopharmacology.org	FALSE	1	1	1	1	1	1	1	1	1	1	1	1	1	1	1	1	1	1	1	1	1	1	1	1	1
CPI-SS061A7E099	CD55_ADGRE5	simple:P08174	simple:P48960	CD55	ADGRE5	TRUE	TRUE	TRUE	curated	FALSE	1	1	1	1	1	1	1	1	1	1	1	1	1	1	1	1	1	1	1	1	1	1	1	1	1
CPI-SS0CBC7840D	PTPRC_CD22	simple:P08575	simple:P20273	PTPRC	CD22	FALSE	FALSE	TRUE	curated	FALSE	1	1	1	1	1	1	1	1	1	1	1	1	1	1	1	1	1	1	1	1	1	1	1	1	1
CPI-SS0822AEF5F	PTPRC_MRC1	simple:P08575	simple:P22897	PTPRC	MRC1	FALSE	FALSE	TRUE	curated	FALSE	1	1	1	1	1	1	1	1	1	1	1	1	1	1	1	1	1	1	1	1	1	1	1	1	1
CPI-SS07F60834D	MET_HGF	simple:P08581	simple:P14210	MET	HGF	TRUE	TRUE	FALSE	curated	FALSE	1	1	1	1	1	1	1	1	1	1	1	1	1	1	1	1	1	1	1	1	1	1	1	1	1
CPI-SS056FF4363	CD48_CD244	simple:P09326	simple:Q9BZW8	CD48	CD244	FALSE	FALSE	TRUE	curated	FALSE	1	1	1	1	1	1	1	1	1	1	1	1	1	1	1	1	1	1	1	1	1	1	1	1	1
CPI-SS0D954EA1C	PDGFRB_PDGFD	simple:P09619	simple:Q9GZP0	PDGFRB	PDGFD	TRUE	TRUE	FALSE	curated	FALSE	1	1	1	1	1	1	1	1	1	1	1	1	0	1	1	1	1	1	1	1	1	1	1	1	1
CPI-CS0BAF97962	PDGFR complex_PDGFD	complex:PDGFR complex	simple:Q9GZP0		PDGFD	TRUE	TRUE	FALSE	curated	FALSE	1	1	1	1	1	1	1	1	1	1	1	1	1	1	1	1	1	1	1	1	1	1	1	1	1
CPI-SS080611C5B	ALOX5_ALOX5AP	simple:P09917	simple:P20292	ALOX5	ALOX5AP	FALSE	FALSE	FALSE	guidetopharmacology.org	FALSE	1	1	1	1	1	1	1	1	1	1	1	1	1	1	1	1	1	1	1	1	1	1	1	1	1
CPI-SS0270A2CA9	NPS_NPSR1	simple:P0C0P6	simple:Q6W5P4	NPS	NPSR1	TRUE	FALSE	TRUE	guidetopharmacology.org	FALSE	1	1	1	1	1	1	1	1	1	1	1	1	1	1	1	1	1	1	1	1	1	1	1	1	1
CPI-SS02D7A1DDE	KIT_KITLG	simple:P10721	simple:P21583	KIT	KITLG	TRUE	TRUE	FALSE	curated	FALSE	1	1	1	1	1	1	1	1	1	1	1	1	1	1	1	1	1	1	1	1	1	0	1	1	1
CPI-SS0EDAE16B6	EPOR_KITLG	simple:P19235	simple:P21583	EPOR	KITLG	TRUE	TRUE	FALSE	I2D	FALSE	1	1	1	1	1	1	1	1	1	1	1	1	1	1	1	1	1	1	1	1	1	1	1	1	1
CPI-SS07327E587	CD28_CD80	simple:P10747	simple:P33681	CD28	CD80	FALSE	FALSE	TRUE	curated	FALSE	1	1	1	1	1	1	1	1	1	1	1	1	1	1	1	1	1	1	1	1	1	1	1	1	1
CPI-SS0320FFAFC	CTLA4_CD80	simple:P16410	simple:P33681	CTLA4	CD80	FALSE	FALSE	TRUE	curated	FALSE	1	1	1	1	1	1	1	1	1	1	1	1	1	1	1	1	1	1	1	1	1	1	1	1	1
CPI-SS077D7365D	CD28_CD86	simple:P10747	simple:P42081	CD28	CD86	FALSE	FALSE	TRUE	curated	FALSE	1	1	1	1	1	1	1	1	1	1	1	1	1	1	1	1	1	1	1	1	1	1	1	1	1
CPI-SS0B0E09B1C	CTLA4_CD86	simple:P16410	simple:P42081	CTLA4	CD86	FALSE	FALSE	TRUE	curated	FALSE	1	1	1	1	1	1	1	1	1	1	1	1	1	1	1	1	1	1	1	1	1	1	1	1	1
CPI-SS0A1864A37	NPR1_NPPC	simple:P16066	simple:P23582	NPR1	NPPC	TRUE	TRUE	FALSE	InnateDB-All	FALSE	1	1	1	1	1	1	1	1	1	1	1	1	1	1	1	1	1	1	1	1	1	1	1	1	1
CPI-SS0EB4002A2	NPR3_NPPC	simple:P17342	simple:P23582	NPR3	NPPC	TRUE	TRUE	FALSE	I2D,InnateDB-All	FALSE	1	1	1	1	1	1	1	1	1	1	1	1	1	1	1	1	1	1	1	1	1	1	1	1	1
CPI-SS06B94F144	NPR2_NPPC	simple:P20594	simple:P23582	NPR2	NPPC	TRUE	TRUE	FALSE	guidetopharmacology.org	FALSE	1	1	1	1	1	1	1	1	1	1	1	1	1	1	1	1	1	1	1	1	1	1	1	1	1
CPI-SS03CC15FF3	PDGFRA_PDGFC	simple:P16234	simple:Q9NRA1	PDGFRA	PDGFC	TRUE	TRUE	FALSE	curated	FALSE	1	1	1	1	1	1	1	1	1	1	1	1	1	1	1	1	1	1	1	1	1	0	0	1	1
CPI-SS03A3EE72E	FLT4_PDGFC	simple:P35916	simple:Q9NRA1	FLT4	PDGFC	TRUE	TRUE	FALSE	guidetopharmacology.org	FALSE	1	1	1	1	1	1	1	1	1	1	1	1	1	1	1	1	1	1	1	1	1	1	1	1	1
CPI-SS0F972435E	FLT4_VEGFC	simple:P35916	simple:P49767	FLT4	VEGFC	TRUE	TRUE	FALSE	curated	FALSE	1	1	1	1	1	1	1	1	1	1	1	1	1	1	1	1	1	1	1	1	1	1	1	1	1
CPI-SS0273C9AED	KDR_VEGFC	simple:P35968	simple:P49767	KDR	VEGFC	TRUE	TRUE	FALSE	curated	FALSE	1	1	1	1	1	1	1	1	1	1	1	1	1	1	1	1	1	1	1	1	1	1	1	1	1
CPI-SS0E0DEA7D5	PECAM1_CD38	simple:P16284	simple:P28907	PECAM1	CD38	FALSE	TRUE	TRUE	curated	FALSE	1	1	1	1	1	1	1	1	1	1	1	1	1	1	1	1	1	1	1	1	1	1	1	1	1
CPI-SS00F69C501	TRH_TRHR	simple:P20396	simple:P34981	TRH	TRHR	TRUE	FALSE	TRUE	I2D	FALSE	1	1	1	1	1	1	1	1	1	1	1	1	1	1	1	1	1	1	1	1	1	1	1	1	1
CPI-SS056AA08CF	EDN2_EDNRA	simple:P20800	simple:P25101	EDN2	EDNRA	TRUE	FALSE	TRUE	guidetopharmacology.org	FALSE	1	1	1	1	1	1	1	1	1	1	1	1	1	1	1	1	1	1	1	1	1	1	1	1	1
CPI-SS01946BE5C	C5AR1_RPS19	simple:P21730	simple:P39019	C5AR1	RPS19	FALSE	TRUE	FALSE	guidetopharmacology.org	FALSE	1	1	1	1	1	1	1	1	1	1	1	1	1	1	1	1	1	1	1	1	1	1	1	1	1
CPI-SS04456F441	TNFSF4_TNFRSF4	simple:P23510	simple:P43489	TNFSF4	TNFRSF4	FALSE	FALSE	TRUE	curated	FALSE	1	1	1	1	1	1	1	1	1	1	1	1	1	1	1	1	1	1	1	1	1	1	1	1	1
CPI-SS0C7915758	CXCR2_CXCL6	simple:P25025	simple:P80162	CXCR2	CXCL6	TRUE	TRUE	FALSE	curated	FALSE	1	1	1	1	1	1	1	1	1	1	1	1	1	1	1	1	1	1	1	1	1	1	1	1	1
CPI-SS0C321CE6D	FPR2_CAMP	simple:P25090	simple:P49913	FPR2	CAMP	TRUE	TRUE	FALSE	guidetopharmacology.org	FALSE	1	1	1	1	1	1	1	1	1	1	1	1	1	1	1	1	1	1	1	1	1	1	1	1	1
CPI-SS03EACE0E0	MST1_MST1R	simple:P26927	simple:Q04912	MST1	MST1R	TRUE	FALSE	TRUE	curated	FALSE	1	1	1	1	1	1	1	1	1	1	1	1	1	1	1	1	1	1	1	1	1	1	1	1	1
CPI-SS0D53B88CC	ACVR2A_INHBC	simple:P27037	simple:P55103	ACVR2A	INHBC	TRUE	TRUE	FALSE	curated	FALSE	1	1	1	1	1	1	1	1	1	1	1	1	1	1	1	1	1	1	1	1	1	1	1	1	1
CPI-SS099C401F7	ACVR2A_INHBE	simple:P27037	simple:P58166	ACVR2A	INHBE	TRUE	TRUE	FALSE	curated	FALSE	1	1	1	1	1	1	1	1	1	1	1	1	1	1	1	1	1	1	1	1	1	1	1	1	1
CPI-SS0412C803A	TNFRSF8_TNFSF8	simple:P28908	simple:P32971	TNFRSF8	TNFSF8	FALSE	TRUE	FALSE	curated	FALSE	1	1	1	1	1	1	1	1	1	1	1	1	1	1	1	1	1	1	1	1	1	1	1	1	1
CPI-SS0D0252D87	AXL_IL15RA	simple:P30530	simple:Q13261	AXL	IL15RA	TRUE	TRUE	TRUE	I2D	FALSE	1	1	1	1	1	1	1	1	1	1	1	0	0	1	1	1	1	1	1	1	1	1	1	1	1
CPI-SS077B160B9	IL15_IL15RA	simple:P40933	simple:Q13261	IL15	IL15RA	TRUE	FALSE	TRUE	guidetopharmacology.org	FALSE	1	1	1	1	1	1	1	1	1	1	1	1	1	1	1	1	0	0	1	1	1	1	1	1	1
CPI-SS03A4F7DC8	AXL_GAS6	simple:P30530	simple:Q14393	AXL	GAS6	TRUE	TRUE	FALSE	guidetopharmacology.org	FALSE	1	1	1	1	1	1	1	1	1	1	1	0	1	1	1	1	1	1	1	1	1	1	1	1	1
CPI-SS085195142	TYRO3_GAS6	simple:Q06418	simple:Q14393	TYRO3	GAS6	TRUE	TRUE	FALSE	guidetopharmacology.org	FALSE	1	0	1	1	1	1	0	1	1	1	1	1	1	1	1	1	1	1	1	1	1	1	1	1	1
CPI-SS0415CC75D	MERTK_GAS6	simple:Q12866	simple:Q14393	MERTK	GAS6	TRUE	TRUE	FALSE	guidetopharmacology.org	FALSE	1	1	1	1	1	1	1	1	1	1	1	0	0	1	0	1	0	0	1	0	1	0	0	1	0
CPI-SS00C069DCB	SSTR1_SST	simple:P30872	simple:P61278	SSTR1	SST	TRUE	TRUE	FALSE	I2D	FALSE	1	1	1	1	1	1	1	1	1	1	1	1	1	1	1	1	1	1	1	1	1	1	1	1	1
CPI-SS0B27088B4	CALCR_ADM	simple:P30988	simple:P35318	CALCR	ADM	TRUE	TRUE	FALSE	guidetopharmacology.org	FALSE	1	1	1	1	1	1	1	1	1	1	1	1	1	1	1	1	1	1	1	1	1	1	1	1	1
CPI-SS083319328	NTSR1_NTS	simple:P30989	simple:P30990	NTSR1	NTS	TRUE	TRUE	FALSE	guidetopharmacology.org	FALSE	1	1	1	1	1	1	1	1	1	1	1	1	1	1	1	1	1	1	1	1	1	1	1	1	1
CPI-SS073C1B796	CD52_SIGLEC10	simple:P31358	simple:Q96LC7	CD52	SIGLEC10	TRUE	FALSE	FALSE	curated	FALSE	1	1	1	1	1	1	1	1	1	1	1	1	1	1	1	1	1	1	1	1	1	1	1	1	1
CPI-SS0D8148841	APLNR_APLN	simple:P35414	simple:Q9ULZ1	APLNR	APLN	TRUE	TRUE	FALSE	guidetopharmacology.org	FALSE	1	1	1	1	1	1	1	1	1	1	1	1	1	1	1	1	1	1	1	1	1	1	1	1	1
CPI-SS06CBC985C	LTBR_LTB	simple:P36941	simple:Q06643	LTBR	LTB	FALSE	TRUE	FALSE	curated	FALSE	1	1	1	1	1	1	1	1	1	1	1	1	1	1	1	1	1	1	1	1	1	1	1	1	1
CPI-SC00ACA947E	GDNF_RET receptor 1	simple:P39905	complex:RET receptor 1	GDNF		TRUE	FALSE	TRUE	curated	FALSE	1	1	1	1	1	1	1	1	1	1	1	1	1	1	1	1	1	1	1	1	1	1	1	1	1
CPI-SC0EB9D030F	ARTN_RET receptor 1	simple:Q5T4W7	complex:RET receptor 1	ARTN		TRUE	FALSE	TRUE	curated	FALSE	1	1	1	1	1	1	1	1	1	1	1	1	1	1	1	1	1	1	1	1	1	1	1	1	1
CPI-SC0273E24EB	ARTN_RET receptor 3	simple:Q5T4W7	complex:RET receptor 3	ARTN		TRUE	FALSE	TRUE	curated	FALSE	1	1	1	1	1	1	1	1	1	1	1	1	1	1	1	1	1	1	1	1	1	1	1	1	1
CPI-SS0DC2DD9D7	THPO_MPL	simple:P40225	simple:P40238	THPO	MPL	TRUE	FALSE	TRUE	curated	FALSE	1	1	1	1	1	1	1	1	1	1	1	1	1	1	1	1	1	1	1	1	1	1	1	1	1
CPI-SS04CD88411	GPR1_RARRES2	simple:P46091	simple:Q99969	GPR1	RARRES2	TRUE	TRUE	FALSE	guidetopharmacology.org	FALSE	1	1	1	1	1	1	1	1	1	1	1	1	1	1	1	1	1	1	1	1	1	1	1	1	1
CPI-SS07D56EB05	CMKLR1_RARRES2	simple:Q99788	simple:Q99969	CMKLR1	RARRES2	TRUE	TRUE	FALSE	guidetopharmacology.org	FALSE	1	1	1	1	1	1	1	1	1	1	1	1	1	1	1	1	1	1	1	1	1	1	1	1	1
CPI-SS0D5E1C3D2	NPBWR1_NPB	simple:P48145	simple:Q8NG41	NPBWR1	NPB	TRUE	TRUE	FALSE	guidetopharmacology.org	FALSE	1	1	1	1	1	1	1	1	1	1	1	1	1	1	1	1	1	1	1	1	1	1	1	1	1
CPI-SS07B3139A0	NMU_NMUR2	simple:P48645	simple:Q9GZQ4	NMU	NMUR2	TRUE	FALSE	TRUE	guidetopharmacology.org	FALSE	1	1	1	1	1	1	1	1	1	1	1	1	1	1	1	1	1	1	1	1	1	1	1	1	1
CPI-SS0C849D294	NMS_NMUR2	simple:Q5H8A3	simple:Q9GZQ4	NMS	NMUR2	TRUE	FALSE	TRUE	guidetopharmacology.org	FALSE	1	1	1	1	1	1	1	1	1	1	1	1	1	1	1	1	1	1	1	1	1	1	1	1	1
CPI-SS018BD4882	NMU_NMUR1	simple:P48645	simple:Q9HB89	NMU	NMUR1	TRUE	FALSE	TRUE	guidetopharmacology.org	FALSE	1	1	1	1	1	1	1	1	1	1	1	1	1	1	1	1	1	1	1	1	1	1	1	1	1
CPI-SS0148BDF1C	NMS_NMUR1	simple:Q5H8A3	simple:Q9HB89	NMS	NMUR1	TRUE	FALSE	TRUE	guidetopharmacology.org	FALSE	1	1	1	1	1	1	1	1	1	1	1	1	1	1	1	1	1	1	1	1	1	1	1	1	1
CPI-SS032E9A219	CX3CR1_CX3CL1	simple:P49238	simple:P78423	CX3CR1	CX3CL1	TRUE	TRUE	TRUE	curated	FALSE	1	1	1	1	1	1	0	1	1	1	1	1	1	1	1	1	0	1	1	1	1	1	1	1	1
CPI-SS0EF1A7415	CCR4_CCL17	simple:P51679	simple:Q92583	CCR4	CCL17	TRUE	TRUE	FALSE	curated	FALSE	1	1	1	1	1	1	1	1	1	1	1	1	1	1	1	1	1	1	1	1	1	1	1	1	1
CPI-SS0974EB232	ACKR1_CCL17	simple:Q16570	simple:Q92583	ACKR1	CCL17	TRUE	TRUE	FALSE	I2D	FALSE	1	1	1	1	1	1	1	1	1	1	1	1	1	1	1	1	1	1	1	1	1	1	1	1	1
CPI-SS04BE14432	INHBC_ACVR2B	simple:P55103	simple:Q13705	INHBC	ACVR2B	TRUE	FALSE	TRUE	curated	FALSE	1	1	1	1	1	1	1	1	1	1	1	1	1	1	1	1	1	1	1	1	1	1	1	1	1
CPI-SS09CCC0451	INHBE_ACVR2B	simple:P58166	simple:Q13705	INHBE	ACVR2B	TRUE	FALSE	TRUE	curated	FALSE	1	1	1	1	1	1	1	1	1	1	1	1	1	1	1	1	1	1	1	1	1	1	1	1	1
CPI-SS0BC884A75	QRFP_QRFPR	simple:P83859	simple:Q96P65	QRFP	QRFPR	TRUE	FALSE	TRUE	guidetopharmacology.org	FALSE	1	1	1	1	1	1	1	1	1	1	1	1	1	1	1	1	1	1	1	1	1	1	1	1	1
CPI-CS0C57A3081	PlexinA1_complex1_SEMA6D	complex:PlexinA1_complex1	simple:Q8NFY4		SEMA6D	FALSE	TRUE	FALSE	curated	FALSE	1	1	1	1	1	1	1	1	1	1	1	1	1	1	1	1	1	1	1	1	1	1	1	1	1
CPI-CS0123BC66C	PlexinA1_complex2_SEMA6D	complex:PlexinA1_complex2	simple:Q8NFY4		SEMA6D	FALSE	TRUE	FALSE	curated	FALSE	1	1	1	1	1	1	1	1	1	1	1	1	1	1	1	1	1	1	1	1	1	1	1	1	1
CPI-SS0B337B316	TEK_ANGPT1	simple:Q02763	simple:Q15389	TEK	ANGPT1	TRUE	TRUE	FALSE	curated	FALSE	1	1	1	1	1	1	0	0	1	0	1	1	1	1	1	1	1	1	1	1	1	1	1	1	1
CPI-SS00BBA318F	TEK_ANGPT4	simple:Q02763	simple:Q9Y264	TEK	ANGPT4	TRUE	TRUE	FALSE	curated	FALSE	1	1	1	1	1	1	1	1	1	1	1	1	1	1	1	1	1	1	1	1	1	1	1	1	1
CPI-SS09D5B5F9C	LRP1_ERFE	simple:Q07954	simple:Q4G0M1	LRP1	ERFE	TRUE	TRUE	FALSE	InnateDB-All	FALSE	1	1	1	1	1	1	1	1	1	1	1	1	1	1	1	1	1	1	1	1	1	1	1	1	1
CPI-SS02EDE5894	CRHR2_UCN3	simple:Q13324	simple:Q969E3	CRHR2	UCN3	TRUE	TRUE	FALSE	guidetopharmacology.org	FALSE	1	1	1	1	1	1	1	1	1	1	1	1	1	1	1	1	1	1	1	1	1	1	1	1	1
CPI-SS083E7D88C	CRHR2_UCN2	simple:Q13324	simple:Q96RP3	CRHR2	UCN2	TRUE	TRUE	FALSE	guidetopharmacology.org	FALSE	1	1	1	1	1	1	1	1	1	1	1	1	1	1	1	1	1	1	1	1	1	1	1	1	1
CPI-SS0D00AAD2F	SEMA5A_PLXNB3	simple:Q13591	simple:Q9ULL4	SEMA5A	PLXNB3	FALSE	FALSE	TRUE	curated	FALSE	1	1	1	1	1	0	1	1	1	1	1	1	1	1	1	1	1	1	1	1	0	1	1	1	1
CPI-SS0893BD6B6	IL16_GRIN2C	simple:Q14005	simple:Q14957	IL16	GRIN2C	TRUE	FALSE	TRUE	I2D	FALSE	1	1	1	1	1	1	1	1	1	1	1	1	1	1	1	1	1	1	1	1	1	1	1	1	1
CPI-SS0F856A80F	KISS1_KISS1R	simple:Q15726	simple:Q969F8	KISS1	KISS1R	TRUE	FALSE	TRUE	guidetopharmacology.org	FALSE	1	1	1	1	1	1	1	1	1	1	1	1	1	1	1	1	1	1	1	1	1	1	1	1	1
CPI-SS07DFEBFA8	GPR19_ENHO	simple:Q15760	simple:Q6UWT2	GPR19	ENHO	TRUE	TRUE	FALSE	guidetopharmacology.org	FALSE	1	1	1	1	1	1	1	1	1	1	1	1	1	1	1	1	1	1	1	1	1	1	1	1	1
CPI-SS08C995EB4	CXCL17_GPR35	simple:Q6UXB2	simple:Q9HC97	CXCL17	GPR35	TRUE	FALSE	TRUE	guidetopharmacology.org	FALSE	1	1	1	1	1	1	1	1	1	1	1	1	1	1	1	1	1	1	1	1	1	1	1	1	1
CPI-SS027E57635	PROKR2_PROK2	simple:Q8NFJ6	simple:Q9HC23	PROKR2	PROK2	TRUE	TRUE	FALSE	guidetopharmacology.org	FALSE	1	1	1	1	1	1	1	1	1	1	1	1	1	1	1	1	1	1	1	1	1	1	1	1	1
CPI-SS09EF54490	ADGRV1_GPHA2	simple:Q8WXG9	simple:Q96T91	ADGRV1	GPHA2	TRUE	TRUE	FALSE	InnateDB-All	FALSE	1	1	1	1	1	1	1	1	1	1	1	1	1	1	1	1	1	1	1	1	1	1	1	1	1
CPI-SS00797FD15	EDA_EDA2R	simple:Q92838	simple:Q9HAV5	EDA	EDA2R	TRUE	FALSE	TRUE	guidetopharmacology.org	FALSE	1	1	1	1	1	1	1	1	1	1	1	1	1	1	1	1	1	1	1	1	1	1	1	1	1
CPI-SS05A8552D7	EDA_EDAR	simple:Q92838	simple:Q9UNE0	EDA	EDAR	TRUE	FALSE	TRUE	guidetopharmacology.org	FALSE	1	1	1	1	1	1	1	1	1	1	1	1	1	1	1	1	1	1	1	1	1	1	1	1	1
CPI-SC090068F7B	TSLP_TSLPR	simple:Q969D9	complex:TSLPR	TSLP		TRUE	FALSE	TRUE	curated	FALSE	1	1	1	1	1	1	1	1	1	1	1	1	1	1	1	1	1	1	1	1	1	1	1	1	1
CPI-SC047CEF2DD	CRLF2_TSLPR	simple:Q9HC73	complex:TSLPR	CRLF2		TRUE	TRUE	TRUE	curated	FALSE	1	1	1	1	1	1	1	1	1	1	1	1	1	1	1	1	1	1	1	1	1	1	1	1	1
CPI-SS04C672963	ESAM_ESAM	simple:Q96AP7	simple:Q96AP7	ESAM	ESAM	FALSE	FALSE	FALSE	curated	FALSE	1	1	1	1	1	1	1	1	1	1	1	1	1	1	1	1	1	1	1	1	1	1	1	1	1
CPI-SS08C78576B	GPHA2_EPHA6	simple:Q96T91	simple:Q9UF33	GPHA2	EPHA6	TRUE	FALSE	TRUE	InnateDB-All	FALSE	1	1	1	1	1	1	1	1	1	1	1	1	1	1	1	1	1	1	1	1	1	1	1	1	1
CPI-SC001AFA16D	NRTN_RET receptor 2	simple:Q99748	complex:RET receptor 2	NRTN		TRUE	FALSE	TRUE	curated	FALSE	1	1	1	1	1	1	1	1	1	1	1	1	1	1	1	1	1	1	1	1	1	1	1	1	1

## Sheet: Mut.means
id_cp_interaction	interacting_pair	partner_a	partner_b	gene_a	gene_b	secreted	receptor_a	receptor_b	annotation_strategy	is_integrin	OL.OL	OL.N	OL.A	OL.M	OL.OP	N.OL	N.N	N.A	N.M	N.OP	A.OL	A.N	A.A	A.M	A.OP	M.OL	M.N	M.A	M.M	M.OP	OP.OL	OP.N	OP.A	OP.M	OP.OP
CPI-SS0A7B487D4	KLRG2_WNT11	simple:A4D1S0	simple:O96014	KLRG2	WNT11	TRUE	TRUE	FALSE	InnateDB-All	FALSE	0	0.007	0	0	0	0	0.016	0	0	0	0	0.012	0	0	0	0	0.008	0	0	0	0	0	0	0	0
CPI-SS0FEC87269	KLRG2_TNFSF9	simple:A4D1S0	simple:P41273	KLRG2	TNFSF9	TRUE	TRUE	FALSE	InnateDB-All	FALSE	0.002	0.002	0	0.002	0.011	0.011	0.011	0	0.011	0.02	0.007	0.007	0	0.007	0.016	0.004	0.003	0	0.004	0.012	0	0	0	0	0
CPI-SS00A8596B5	PVR_TNFSF9	simple:P15151	simple:P41273	PVR	TNFSF9	TRUE	TRUE	FALSE	InnateDB-All	FALSE	0.015	0.015	0	0.015	0.024	0.042	0.042	0	0.042	0.051	0.014	0.014	0	0.014	0.023	0.024	0.024	0	0.024	0.033	0.035	0.035	0	0.035	0.044
CPI-SS044DF8749	KLRG2_WNT5B	simple:A4D1S0	simple:Q9H1J7	KLRG2	WNT5B	TRUE	TRUE	FALSE	InnateDB-All	FALSE	0.028	0.163	0.032	0.013	0.023	0.036	0.172	0.041	0.021	0.032	0.032	0.168	0.037	0.017	0.028	0.029	0.164	0.034	0.014	0.025	0	0	0	0	0
CPI-SS0F8ABC300	GALR2_GAL	simple:O43603	simple:P22466	GALR2	GAL	TRUE	TRUE	FALSE	guidetopharmacology.org	FALSE	0.004	0.031	0.003	0.002	0.005	0.006	0.033	0.005	0.004	0.007	0	0	0	0	0	0	0	0	0	0	0	0	0	0	0
CPI-SS0E70DD97F	GALR3_GAL	simple:O60755	simple:P22466	GALR3	GAL	TRUE	TRUE	FALSE	guidetopharmacology.org	FALSE	0.004	0.031	0.003	0.002	0.005	0.004	0.032	0.003	0.002	0.005	0	0	0	0	0	0	0	0	0	0	0	0	0	0	0
CPI-SS0B84DAE3D	PVR_CD96	simple:P15151	simple:P40200	PVR	CD96	TRUE	TRUE	TRUE	curated	FALSE	0.014	0.016	0	0	0	0.041	0.043	0	0	0	0.013	0.015	0	0	0	0.023	0.025	0	0	0	0.034	0.036	0	0	0
CPI-SS0A8627ED6	PVR_CD226	simple:P15151	simple:Q15762	PVR	CD226	TRUE	TRUE	TRUE	curated	FALSE	0.014	0.043	0.018	0.017	0.021	0.042	0.07	0.046	0.044	0.049	0.014	0.042	0.018	0.016	0.021	0.024	0.052	0.027	0.026	0.03	0.034	0.063	0.038	0.037	0.041
CPI-SS00561BBD7	PVR_TIGIT	simple:P15151	simple:Q495A1	PVR	TIGIT	TRUE	TRUE	FALSE	curated	FALSE	0.014	0.015	0.015	0.015	0	0.042	0.043	0.042	0.042	0	0.014	0.015	0.014	0.014	0	0.024	0.024	0.024	0.024	0	0.034	0.035	0.035	0.035	0
CPI-SS0F1A060D4	PVR_NECTIN3	simple:P15151	simple:Q9NQS3	PVR	NECTIN3	TRUE	TRUE	FALSE	curated	FALSE	0.056	0.197	0.182	0.027	0.259	0.083	0.224	0.21	0.054	0.286	0.055	0.196	0.182	0.026	0.259	0.065	0.206	0.192	0.036	0.268	0.076	0.217	0.203	0.047	0.279
CPI-SS00550260E	CADM3_NECTIN3	simple:Q8N126	simple:Q9NQS3	CADM3	NECTIN3	FALSE	FALSE	FALSE	curated	FALSE	0.091	0.232	0.218	0.062	0.295	0.772	0.914	0.899	0.744	0.976	0.117	0.258	0.243	0.088	0.32	0.09	0.231	0.217	0.061	0.293	0.229	0.37	0.355	0.2	0.432
CPI-SS0B990492C	CADM1_NECTIN3	simple:Q9BY67	simple:Q9NQS3	CADM1	NECTIN3	FALSE	FALSE	FALSE	curated	FALSE	0.838	0.979	0.965	0.809	1.042	3.976	4.117	4.103	3.947	4.179	1.825	1.966	1.951	1.796	2.028	1.127	1.268	1.254	1.098	1.33	2.217	2.358	2.343	2.188	2.42
CPI-SS0C5E9FBFB	NECTIN1_NECTIN3	simple:Q15223	simple:Q9NQS3	NECTIN1	NECTIN3	TRUE	TRUE	FALSE	curated	FALSE	0.237	0.378	0.364	0.208	0.44	0.234	0.375	0.361	0.206	0.438	0.094	0.235	0.221	0.065	0.297	0.07	0.211	0.196	0.041	0.273	0.158	0.299	0.285	0.129	0.362
CPI-SS03859E16F	TIGIT_NECTIN3	simple:Q495A1	simple:Q9NQS3	TIGIT	NECTIN3	FALSE	FALSE	FALSE	curated	FALSE	0.042	0.183	0.169	0.013	0.246	0.043	0.184	0.17	0.014	0.246	0.043	0.184	0.169	0.014	0.246	0.043	0.184	0.169	0.014	0.246	0	0	0	0	0
CPI-SS02FBD007E	NECTIN2_NECTIN3	simple:Q92692	simple:Q9NQS3	NECTIN2	NECTIN3	FALSE	TRUE	FALSE	curated	FALSE	0.044	0.185	0.17	0.015	0.247	0.064	0.205	0.191	0.036	0.268	0.071	0.213	0.198	0.043	0.275	0.059	0.2	0.185	0.03	0.262	0.073	0.215	0.2	0.045	0.277
CPI-SS09C06644C	CADM3_CADM1	simple:Q8N126	simple:Q9BY67	CADM3	CADM1	FALSE	FALSE	FALSE	curated	FALSE	0.846	3.983	1.832	1.135	2.224	1.527	4.665	2.513	1.816	2.905	0.871	4.009	1.858	1.16	2.25	0.845	3.982	1.831	1.134	2.223	0.983	4.121	1.97	1.272	2.362
CPI-SS0889E281D	CADM1_CADM1	simple:Q9BY67	simple:Q9BY67	CADM1	CADM1	FALSE	FALSE	FALSE	curated	FALSE	1.593	4.73	2.579	1.882	2.971	4.73	7.868	5.717	5.019	6.109	2.579	5.717	3.566	2.868	3.958	1.882	5.019	2.868	2.171	3.26	2.971	6.109	3.958	3.26	4.35
CPI-SS0C9696AAA	CRTAM_CADM1	simple:O95727	simple:Q9BY67	CRTAM	CADM1	FALSE	FALSE	FALSE	curated	FALSE	0.797	3.935	1.784	1.086	2.176	0.799	3.936	1.785	1.088	2.177	0	0	0	0	0	0.797	3.935	1.784	1.086	2.176	0.799	3.936	1.785	1.088	2.177
CPI-SS02D18D12B	CADM3_CADM4	simple:Q8N126	simple:Q8NFZ8	CADM3	CADM4	FALSE	FALSE	FALSE	curated	FALSE	0.181	0.27	0.261	0.087	0.346	0.862	0.951	0.942	0.768	1.027	0.206	0.295	0.286	0.112	0.371	0.179	0.269	0.26	0.085	0.344	0.318	0.407	0.398	0.224	0.483
CPI-SS0B3829651	CADM3_EPB41L1	simple:Q8N126	simple:Q9H4G0	CADM3	EPB41L1	FALSE	FALSE	FALSE	curated	FALSE	0.208	1.362	0.205	0.146	0.29	0.889	2.043	0.886	0.827	0.971	0.234	1.387	0.231	0.171	0.315	0.207	1.361	0.204	0.145	0.289	0.346	1.499	0.343	0.283	0.427
CPI-SS00661A3A4	NECTIN1_CADM3	simple:Q15223	simple:Q8N126	NECTIN1	CADM3	TRUE	TRUE	FALSE	curated	FALSE	0.244	0.926	0.27	0.243	0.382	0.242	0.923	0.267	0.241	0.379	0.102	0.783	0.127	0.1	0.239	0.077	0.758	0.103	0.076	0.215	0.166	0.847	0.191	0.165	0.303
CPI-SS01E0F2D2C	NECTIN1_NECTIN4	simple:Q15223	simple:Q96NY8	NECTIN1	NECTIN4	TRUE	TRUE	TRUE	curated	FALSE	0.197	0.227	0.2	0.214	0.207	0.194	0.225	0.197	0.211	0.205	0.054	0.085	0.057	0.071	0.064	0.029	0.06	0.033	0.046	0.04	0.118	0.149	0.121	0.135	0.129
CPI-SS0A5DF05C0	TIGIT_NECTIN2	simple:Q495A1	simple:Q92692	TIGIT	NECTIN2	FALSE	FALSE	TRUE	curated	FALSE	0.002	0.023	0.03	0.017	0.032	0.003	0.024	0.031	0.018	0.033	0.003	0.023	0.03	0.017	0.032	0.003	0.023	0.031	0.018	0.032	0	0	0	0	0
CPI-SS06207F70E	CD226_NECTIN2	simple:Q15762	simple:Q92692	CD226	NECTIN2	FALSE	TRUE	TRUE	curated	FALSE	0.002	0.023	0.03	0.017	0.032	0.031	0.051	0.058	0.045	0.06	0.006	0.027	0.034	0.021	0.036	0.005	0.025	0.032	0.019	0.034	0.009	0.03	0.037	0.024	0.039
CPI-SC01C699B73	COL6A6_a10b1 complex	simple:A6NMZ7	complex:a10b1 complex	COL6A6		TRUE	FALSE	FALSE	curated	TRUE	0.006	0.109	0.025	0.009	0.016	0.033	0.136	0.052	0.037	0.043	0	0	0	0	0	0.006	0.11	0.026	0.01	0.016	0.017	0.12	0.036	0.02	0.027
CPI-SC00A0B0892	COL6A5_a10b1 complex	simple:A8TX70	complex:a10b1 complex	COL6A5		TRUE	FALSE	FALSE	curated	TRUE	0.005	0.108	0.024	0.009	0.015	0.008	0.112	0.028	0.012	0.018	0.005	0.109	0.025	0.009	0.015	0	0	0	0	0	0	0	0	0	0
CPI-SC07ECBFCA7	COL1A1_a10b1 complex	simple:P02452	complex:a10b1 complex	COL1A1		TRUE	FALSE	FALSE	curated	TRUE	0.005	0.108	0.024	0.009	0.015	0.006	0.11	0.026	0.01	0.016	0.047	0.15	0.066	0.051	0.057	0	0	0	0	0	0	0	0	0	0
CPI-SC0DA298BEC	COL2A1_a10b1 complex	simple:P02458	complex:a10b1 complex	COL2A1		TRUE	FALSE	FALSE	curated	TRUE	0.008	0.111	0.027	0.012	0.018	0.009	0.113	0.029	0.013	0.019	0.005	0.109	0.025	0.009	0.015	0.005	0.109	0.025	0.009	0.015	0.007	0.11	0.026	0.011	0.017
CPI-SC067433F6B	COL3A1_a10b1 complex	simple:P02461	complex:a10b1 complex	COL3A1		TRUE	FALSE	FALSE	curated	TRUE	0.005	0.108	0.024	0.009	0.015	0.011	0.114	0.031	0.015	0.021	0.005	0.109	0.025	0.009	0.015	0	0	0	0	0	0.007	0.11	0.026	0.011	0.017
CPI-SC0B6F1A278	COL4A1_a10b1 complex	simple:P02462	complex:a10b1 complex	COL4A1		TRUE	FALSE	FALSE	curated	TRUE	0.01	0.113	0.029	0.013	0.02	0.221	0.325	0.241	0.225	0.231	0.042	0.145	0.061	0.046	0.052	0.018	0.122	0.038	0.022	0.028	0.034	0.137	0.053	0.037	0.044
CPI-SC0D19BAF15	FN1_a10b1 complex	simple:P02751	complex:a10b1 complex	FN1		TRUE	FALSE	FALSE	curated	TRUE	0.005	0.108	0.024	0.009	0.015	0.014	0.118	0.034	0.018	0.024	0.006	0.109	0.025	0.01	0.016	0	0	0	0	0	0.012	0.115	0.031	0.016	0.022
CPI-SC0F516B854	COL5A2_a10b1 complex	simple:P05997	complex:a10b1 complex	COL5A2		TRUE	FALSE	FALSE	curated	TRUE	0.009	0.113	0.029	0.013	0.019	0.107	0.211	0.127	0.111	0.117	0.036	0.139	0.055	0.039	0.046	0.009	0.113	0.029	0.013	0.019	0.007	0.11	0.026	0.011	0.017
CPI-SC011F01833	COL1A2_a10b1 complex	simple:P08123	complex:a10b1 complex	COL1A2		TRUE	FALSE	FALSE	curated	TRUE	0.01	0.113	0.029	0.013	0.02	0.011	0.115	0.031	0.015	0.021	0.068	0.171	0.087	0.072	0.078	0.005	0.109	0.025	0.009	0.015	0	0	0	0	0
CPI-SC0FA79E269	COL4A2_a10b1 complex	simple:P08572	complex:a10b1 complex	COL4A2		TRUE	FALSE	FALSE	curated	TRUE	0.01	0.114	0.03	0.014	0.02	0.388	0.491	0.407	0.391	0.398	0.093	0.197	0.113	0.097	0.103	0.023	0.126	0.043	0.027	0.033	0.07	0.173	0.09	0.074	0.08
CPI-SC04936738A	COL11A1_a10b1 complex	simple:P12107	complex:a10b1 complex	COL11A1		TRUE	FALSE	FALSE	curated	TRUE	0.031	0.134	0.05	0.035	0.041	1.573	1.676	1.592	1.576	1.583	0.18	0.284	0.2	0.184	0.19	0.091	0.194	0.11	0.095	0.101	0.376	0.479	0.395	0.38	0.386
CPI-SC02B111AB0	COL6A1_a10b1 complex	simple:P12109	complex:a10b1 complex	COL6A1		TRUE	FALSE	FALSE	curated	TRUE	0.005	0.108	0.024	0.009	0.015	0.026	0.129	0.045	0.03	0.036	0.005	0.109	0.025	0.009	0.015	0	0	0	0	0	0.009	0.113	0.029	0.013	0.019
CPI-SC0CE851065	COL6A2_a10b1 complex	simple:P12110	complex:a10b1 complex	COL6A2		TRUE	FALSE	FALSE	curated	TRUE	0.007	0.11	0.026	0.011	0.017	0.011	0.114	0.03	0.014	0.021	0	0	0	0	0	0.005	0.109	0.025	0.009	0.015	0	0	0	0	0
CPI-SC07375C073	COL6A3_a10b1 complex	simple:P12111	complex:a10b1 complex	COL6A3		TRUE	FALSE	FALSE	curated	TRUE	0.022	0.125	0.042	0.026	0.032	0.012	0.115	0.031	0.016	0.022	0.008	0.111	0.028	0.012	0.018	0.013	0.116	0.032	0.017	0.023	0.014	0.118	0.034	0.018	0.024
CPI-SC0D6C777F2	COL11A2_a10b1 complex	simple:P13942	complex:a10b1 complex	COL11A2		TRUE	FALSE	FALSE	curated	TRUE	0.039	0.142	0.058	0.043	0.049	0.038	0.141	0.057	0.042	0.048	0.11	0.214	0.13	0.114	0.12	0.011	0.114	0.03	0.015	0.021	0.218	0.322	0.238	0.222	0.228
CPI-SC0F74C069F	COL9A1_a10b1 complex	simple:P20849	complex:a10b1 complex	COL9A1		TRUE	FALSE	FALSE	curated	TRUE	0.02	0.124	0.04	0.024	0.03	0.008	0.112	0.028	0.012	0.018	0.007	0.11	0.026	0.01	0.017	0	0	0	0	0	0.104	0.207	0.123	0.108	0.114
CPI-SC041DEF0FB	COL5A1_a10b1 complex	simple:P20908	complex:a10b1 complex	COL5A1		TRUE	FALSE	FALSE	curated	TRUE	0.005	0.109	0.025	0.009	0.015	0.031	0.134	0.05	0.035	0.041	0.013	0.116	0.032	0.017	0.023	0.005	0.109	0.025	0.009	0.015	0.026	0.13	0.046	0.03	0.036
CPI-SC0C907A888	COL8A2_a10b1 complex	simple:P25067	complex:a10b1 complex	COL8A2		TRUE	FALSE	FALSE	curated	TRUE	0.005	0.108	0.024	0.009	0.015	0.011	0.114	0.03	0.015	0.021	0.006	0.109	0.025	0.01	0.016	0	0	0	0	0	0.007	0.11	0.026	0.011	0.017
CPI-SC08B1D5269	COL5A3_a10b1 complex	simple:P25940	complex:a10b1 complex	COL5A3		TRUE	FALSE	FALSE	curated	TRUE	0.01	0.113	0.029	0.014	0.02	0.03	0.134	0.05	0.034	0.04	0.175	0.279	0.195	0.179	0.185	0.006	0.11	0.026	0.01	0.016	0.235	0.339	0.255	0.239	0.245
CPI-SC0F8101D41	COL8A1_a10b1 complex	simple:P27658	complex:a10b1 complex	COL8A1		TRUE	FALSE	FALSE	curated	TRUE	0.007	0.11	0.026	0.011	0.017	0.131	0.235	0.151	0.135	0.141	0.017	0.12	0.036	0.02	0.027	0.016	0.119	0.035	0.019	0.026	0	0	0	0	0
CPI-SC087556B01	COL4A5_a10b1 complex	simple:P29400	complex:a10b1 complex	COL4A5		TRUE	FALSE	FALSE	curated	TRUE	0.011	0.115	0.031	0.015	0.021	0.174	0.277	0.194	0.178	0.184	0.154	0.257	0.173	0.158	0.164	0.014	0.117	0.033	0.018	0.024	0.009	0.113	0.029	0.013	0.019
CPI-SC08E75294D	COL15A1_a10b1 complex	simple:P39059	complex:a10b1 complex	COL15A1		TRUE	FALSE	FALSE	curated	TRUE	0.016	0.12	0.036	0.02	0.026	0.065	0.168	0.084	0.069	0.075	0.009	0.112	0.028	0.013	0.019	0.078	0.181	0.097	0.082	0.088	0.012	0.115	0.031	0.016	0.022
CPI-SC0017F527E	COL18A1_a10b1 complex	simple:P39060	complex:a10b1 complex	COL18A1		TRUE	FALSE	FALSE	curated	TRUE	0.005	0.109	0.025	0.009	0.015	0.049	0.152	0.068	0.053	0.059	0.006	0.109	0.025	0.01	0.016	0	0	0	0	0	0.075	0.178	0.094	0.079	0.085
CPI-SC00C0800EB	COL4A4_a10b1 complex	simple:P53420	complex:a10b1 complex	COL4A4		TRUE	FALSE	FALSE	curated	TRUE	0.007	0.111	0.027	0.011	0.017	0.049	0.153	0.069	0.053	0.059	0.01	0.114	0.03	0.014	0.02	0.007	0.111	0.027	0.011	0.017	0.017	0.12	0.036	0.02	0.027
CPI-SC0A3F146C2	COL4A3_a10b1 complex	simple:Q01955	complex:a10b1 complex	COL4A3		TRUE	FALSE	FALSE	curated	TRUE	0.005	0.109	0.025	0.009	0.015	0.017	0.121	0.037	0.021	0.027	0.009	0.113	0.029	0.013	0.019	0.005	0.109	0.025	0.009	0.015	0	0	0	0	0
CPI-SC015980AEB	COL14A1_a10b1 complex	simple:Q05707	complex:a10b1 complex	COL14A1		TRUE	FALSE	FALSE	curated	TRUE	0.006	0.109	0.025	0.01	0.016	0.033	0.136	0.052	0.036	0.043	0.009	0.113	0.029	0.013	0.019	0.018	0.122	0.038	0.022	0.028	0	0	0	0	0
CPI-SC0F94B2CF9	COL16A1_a10b1 complex	simple:Q07092	complex:a10b1 complex	COL16A1		TRUE	FALSE	FALSE	curated	TRUE	0.062	0.165	0.081	0.066	0.072	0.222	0.325	0.241	0.226	0.232	0.154	0.257	0.173	0.158	0.164	0.02	0.124	0.04	0.024	0.03	0.177	0.28	0.196	0.181	0.187
CPI-SC05565E8CE	COL4A6_a10b1 complex	simple:Q14031	complex:a10b1 complex	COL4A6		TRUE	FALSE	FALSE	curated	TRUE	0.006	0.109	0.025	0.009	0.016	0.026	0.13	0.046	0.03	0.036	0.007	0.111	0.027	0.011	0.017	0	0	0	0	0	0.012	0.115	0.031	0.016	0.022
CPI-SC067EE23E1	COL9A2_a10b1 complex	simple:Q14055	complex:a10b1 complex	COL9A2		TRUE	FALSE	FALSE	curated	TRUE	0.009	0.113	0.029	0.013	0.019	0.037	0.141	0.057	0.041	0.047	0.012	0.115	0.031	0.015	0.022	0.005	0.109	0.025	0.009	0.015	0.073	0.176	0.092	0.076	0.083
CPI-SC09DFB2ACA	COL19A1_a10b1 complex	simple:Q14993	complex:a10b1 complex	COL19A1		TRUE	FALSE	FALSE	curated	TRUE	0.026	0.13	0.046	0.03	0.036	0.899	1.002	0.918	0.903	0.909	0.113	0.217	0.133	0.117	0.123	0.064	0.167	0.083	0.068	0.074	0.041	0.144	0.06	0.045	0.051
CPI-SC05D8C0EF5	COL28A1_a10b1 complex	simple:Q2UY09	complex:a10b1 complex	COL28A1		TRUE	FALSE	FALSE	curated	TRUE	0.005	0.108	0.024	0.009	0.015	0.013	0.116	0.032	0.016	0.023	0.009	0.113	0.029	0.013	0.019	0	0	0	0	0	0.009	0.113	0.029	0.013	0.019
CPI-SC0725E3A76	COL13A1_a10b1 complex	simple:Q5TAT6	complex:a10b1 complex	COL13A1		FALSE	FALSE	FALSE	curated	TRUE	0.005	0.108	0.024	0.009	0.015	0.016	0.119	0.035	0.02	0.026	0.006	0.109	0.025	0.01	0.016	0	0	0	0	0	0.007	0.11	0.026	0.011	0.017
CPI-SC0C9CBDD21	COL27A1_a10b1 complex	simple:Q8IZC6	complex:a10b1 complex	COL27A1		TRUE	FALSE	FALSE	curated	TRUE	0.007	0.11	0.026	0.011	0.017	0.023	0.126	0.042	0.026	0.033	0.06	0.164	0.08	0.064	0.07	0.336	0.439	0.355	0.34	0.346	0.233	0.336	0.252	0.237	0.243
CPI-SC0147A8A42	COL26A1_a10b1 complex	simple:Q96A83	complex:a10b1 complex	COL26A1		TRUE	FALSE	FALSE	curated	TRUE	0.01	0.113	0.029	0.014	0.02	0.307	0.411	0.327	0.311	0.317	0.026	0.129	0.045	0.03	0.036	0.024	0.127	0.043	0.028	0.034	0.031	0.135	0.051	0.035	0.041
CPI-SC02131C05A	COL12A1_a10b1 complex	simple:Q99715	complex:a10b1 complex	COL12A1		TRUE	FALSE	FALSE	curated	TRUE	0.007	0.11	0.027	0.011	0.017	0.071	0.174	0.09	0.075	0.081	0.033	0.136	0.052	0.037	0.043	0.016	0.119	0.035	0.019	0.026	0.012	0.115	0.031	0.016	0.022
CPI-SC0BF16A11C	COL20A1_a10b1 complex	simple:Q9P218	complex:a10b1 complex	COL20A1		TRUE	FALSE	FALSE	curated	TRUE	0.01	0.114	0.03	0.014	0.02	0.032	0.135	0.051	0.036	0.042	0.017	0.12	0.036	0.02	0.027	0.008	0.112	0.028	0.012	0.018	0.041	0.144	0.06	0.045	0.051
CPI-SC06B4C6DD5	COL17A1_a10b1 complex	simple:Q9UMD9	complex:a10b1 complex	COL17A1		TRUE	FALSE	FALSE	curated	TRUE	0.005	0.109	0.025	0.009	0.015	0.009	0.112	0.028	0.013	0.019	0.005	0.109	0.025	0.009	0.015	0	0	0	0	0	0	0	0	0	0
CPI-SC07E0348EF	COL6A6_a11b1 complex	simple:A6NMZ7	complex:a11b1 complex	COL6A6		TRUE	FALSE	FALSE	curated	TRUE	0.006	0.041	0.015	0.002	0.006	0.034	0.068	0.042	0.029	0.033	0	0	0	0	0	0.007	0.042	0.016	0.003	0.007	0.017	0.052	0.026	0.013	0.017
CPI-SC05CE52A12	COL6A5_a11b1 complex	simple:A8TX70	complex:a11b1 complex	COL6A5		TRUE	FALSE	FALSE	curated	TRUE	0.006	0.04	0.014	0.001	0.005	0.009	0.044	0.018	0.005	0.008	0.006	0.041	0.015	0.002	0.006	0	0	0	0	0	0	0	0	0	0
CPI-SC0F7E26271	COL1A1_a11b1 complex	simple:P02452	complex:a11b1 complex	COL1A1		TRUE	FALSE	FALSE	curated	TRUE	0.006	0.04	0.014	0.001	0.005	0.007	0.042	0.016	0.003	0.007	0.048	0.082	0.056	0.043	0.047	0	0	0	0	0	0	0	0	0	0
CPI-SC0CF621D48	COL2A1_a11b1 complex	simple:P02458	complex:a11b1 complex	COL2A1		TRUE	FALSE	FALSE	curated	TRUE	0.009	0.044	0.018	0.004	0.008	0.01	0.045	0.019	0.006	0.01	0.006	0.041	0.015	0.002	0.006	0.006	0.041	0.015	0.002	0.006	0.008	0.043	0.017	0.003	0.007
CPI-SC0A8902C85	COL3A1_a11b1 complex	simple:P02461	complex:a11b1 complex	COL3A1		TRUE	FALSE	FALSE	curated	TRUE	0.006	0.041	0.014	0.001	0.005	0.012	0.047	0.021	0.007	0.011	0.006	0.041	0.015	0.002	0.006	0	0	0	0	0	0.008	0.043	0.017	0.003	0.007
CPI-SC0A0532ADC	COL4A1_a11b1 complex	simple:P02462	complex:a11b1 complex	COL4A1		TRUE	FALSE	FALSE	curated	TRUE	0.01	0.045	0.019	0.006	0.01	0.222	0.257	0.231	0.218	0.222	0.043	0.078	0.051	0.038	0.042	0.019	0.054	0.028	0.015	0.019	0.034	0.069	0.043	0.03	0.034
CPI-SC0CFF5E19D	FN1_a11b1 complex	simple:P02751	complex:a11b1 complex	FN1		TRUE	FALSE	FALSE	curated	TRUE	0.006	0.041	0.014	0.001	0.005	0.015	0.05	0.024	0.011	0.015	0.007	0.042	0.016	0.002	0.006	0	0	0	0	0	0.013	0.047	0.021	0.008	0.012
CPI-SC0DF641DAA	COL5A2_a11b1 complex	simple:P05997	complex:a11b1 complex	COL5A2		TRUE	FALSE	FALSE	curated	TRUE	0.01	0.045	0.019	0.006	0.01	0.108	0.143	0.117	0.104	0.108	0.036	0.071	0.045	0.032	0.036	0.01	0.045	0.019	0.006	0.009	0.008	0.043	0.017	0.003	0.007
CPI-SC0681D30FE	COL1A2_a11b1 complex	simple:P08123	complex:a11b1 complex	COL1A2		TRUE	FALSE	FALSE	curated	TRUE	0.01	0.045	0.019	0.006	0.01	0.012	0.047	0.021	0.008	0.012	0.069	0.104	0.078	0.064	0.068	0.006	0.041	0.015	0.002	0.006	0	0	0	0	0
CPI-SC02017BE74	COL4A2_a11b1 complex	simple:P08572	complex:a11b1 complex	COL4A2		TRUE	FALSE	FALSE	curated	TRUE	0.011	0.046	0.02	0.007	0.01	0.388	0.423	0.397	0.384	0.388	0.094	0.129	0.103	0.09	0.094	0.024	0.059	0.033	0.019	0.023	0.071	0.106	0.08	0.066	0.07
CPI-SC0861656EC	COL11A1_a11b1 complex	simple:P12107	complex:a11b1 complex	COL11A1		TRUE	FALSE	FALSE	curated	TRUE	0.032	0.067	0.041	0.027	0.031	1.573	1.608	1.582	1.569	1.573	0.181	0.216	0.19	0.177	0.18	0.092	0.126	0.1	0.087	0.091	0.377	0.411	0.385	0.372	0.376
CPI-SC04085F9F9	COL6A1_a11b1 complex	simple:P12109	complex:a11b1 complex	COL6A1		TRUE	FALSE	FALSE	curated	TRUE	0.006	0.04	0.014	0.001	0.005	0.027	0.061	0.035	0.022	0.026	0.006	0.041	0.015	0.002	0.006	0	0	0	0	0	0.01	0.045	0.019	0.006	0.01
CPI-SC0A54B5323	COL6A2_a11b1 complex	simple:P12110	complex:a11b1 complex	COL6A2		TRUE	FALSE	FALSE	curated	TRUE	0.007	0.042	0.016	0.003	0.007	0.011	0.046	0.02	0.007	0.011	0	0	0	0	0	0.006	0.041	0.015	0.002	0.006	0	0	0	0	0
CPI-SC0ECFACED2	COL6A3_a11b1 complex	simple:P12111	complex:a11b1 complex	COL6A3		TRUE	FALSE	FALSE	curated	TRUE	0.023	0.058	0.032	0.018	0.022	0.013	0.047	0.021	0.008	0.012	0.009	0.044	0.018	0.004	0.008	0.014	0.048	0.022	0.009	0.013	0.015	0.05	0.024	0.011	0.015
CPI-SC0CA323AE3	COL11A2_a11b1 complex	simple:P13942	complex:a11b1 complex	COL11A2		TRUE	FALSE	FALSE	curated	TRUE	0.04	0.074	0.048	0.035	0.039	0.039	0.074	0.047	0.034	0.038	0.111	0.146	0.12	0.107	0.111	0.012	0.047	0.021	0.007	0.011	0.219	0.254	0.228	0.215	0.218
CPI-SC0CBC30AB7	COL9A1_a11b1 complex	simple:P20849	complex:a11b1 complex	COL9A1		TRUE	FALSE	FALSE	curated	TRUE	0.021	0.056	0.03	0.017	0.021	0.009	0.044	0.018	0.005	0.008	0.007	0.042	0.016	0.003	0.007	0	0	0	0	0	0.105	0.14	0.114	0.1	0.104
CPI-SC0092846B0	COL5A1_a11b1 complex	simple:P20908	complex:a11b1 complex	COL5A1		TRUE	FALSE	FALSE	curated	TRUE	0.006	0.041	0.015	0.002	0.006	0.032	0.066	0.04	0.027	0.031	0.014	0.049	0.023	0.009	0.013	0.006	0.041	0.015	0.002	0.006	0.027	0.062	0.036	0.023	0.027
CPI-SC08AF9CA91	COL8A2_a11b1 complex	simple:P25067	complex:a11b1 complex	COL8A2		TRUE	FALSE	FALSE	curated	TRUE	0.006	0.04	0.014	0.001	0.005	0.011	0.046	0.02	0.007	0.011	0.007	0.042	0.016	0.002	0.006	0	0	0	0	0	0.008	0.043	0.017	0.003	0.007
CPI-SC07E958BDE	COL5A3_a11b1 complex	simple:P25940	complex:a11b1 complex	COL5A3		TRUE	FALSE	FALSE	curated	TRUE	0.011	0.046	0.02	0.006	0.01	0.031	0.066	0.04	0.027	0.031	0.176	0.211	0.185	0.172	0.176	0.007	0.042	0.016	0.003	0.007	0.236	0.271	0.245	0.232	0.235
CPI-SC08CC68F11	COL8A1_a11b1 complex	simple:P27658	complex:a11b1 complex	COL8A1		TRUE	FALSE	FALSE	curated	TRUE	0.008	0.043	0.017	0.003	0.007	0.132	0.167	0.141	0.128	0.132	0.017	0.052	0.026	0.013	0.017	0.016	0.051	0.025	0.012	0.016	0	0	0	0	0
CPI-SC0CE433AB8	COL4A5_a11b1 complex	simple:P29400	complex:a11b1 complex	COL4A5		TRUE	FALSE	FALSE	curated	TRUE	0.012	0.047	0.021	0.008	0.012	0.175	0.21	0.184	0.17	0.174	0.155	0.19	0.164	0.15	0.154	0.015	0.049	0.023	0.01	0.014	0.01	0.045	0.019	0.006	0.01
CPI-SC03BFF1D95	COL15A1_a11b1 complex	simple:P39059	complex:a11b1 complex	COL15A1		TRUE	FALSE	FALSE	curated	TRUE	0.017	0.052	0.026	0.013	0.017	0.066	0.1	0.074	0.061	0.065	0.01	0.044	0.018	0.005	0.009	0.079	0.113	0.087	0.074	0.078	0.013	0.047	0.021	0.008	0.012
CPI-SC03ADD2063	COL18A1_a11b1 complex	simple:P39060	complex:a11b1 complex	COL18A1		TRUE	FALSE	FALSE	curated	TRUE	0.006	0.041	0.015	0.002	0.006	0.05	0.084	0.058	0.045	0.049	0.007	0.042	0.016	0.002	0.006	0	0	0	0	0	0.076	0.111	0.084	0.071	0.075
CPI-SC0082A7233	COL4A4_a11b1 complex	simple:P53420	complex:a11b1 complex	COL4A4		TRUE	FALSE	FALSE	curated	TRUE	0.008	0.043	0.017	0.004	0.008	0.05	0.085	0.059	0.046	0.05	0.011	0.046	0.02	0.007	0.01	0.008	0.043	0.017	0.004	0.008	0.017	0.052	0.026	0.013	0.017
CPI-SC0674C647E	COL4A3_a11b1 complex	simple:Q01955	complex:a11b1 complex	COL4A3		TRUE	FALSE	FALSE	curated	TRUE	0.006	0.041	0.015	0.002	0.006	0.018	0.053	0.027	0.014	0.017	0.01	0.045	0.019	0.006	0.01	0.006	0.041	0.015	0.002	0.006	0	0	0	0	0
CPI-SC060984F83	COL14A1_a11b1 complex	simple:Q05707	complex:a11b1 complex	COL14A1		TRUE	FALSE	FALSE	curated	TRUE	0.007	0.041	0.015	0.002	0.006	0.033	0.068	0.042	0.029	0.033	0.01	0.045	0.019	0.006	0.01	0.019	0.054	0.028	0.015	0.019	0	0	0	0	0
CPI-SC0014D5A6E	COL16A1_a11b1 complex	simple:Q07092	complex:a11b1 complex	COL16A1		TRUE	FALSE	FALSE	curated	TRUE	0.063	0.098	0.071	0.058	0.062	0.223	0.258	0.231	0.218	0.222	0.155	0.19	0.164	0.15	0.154	0.021	0.056	0.03	0.017	0.021	0.178	0.212	0.186	0.173	0.177
CPI-SC0B066E03C	COL4A6_a11b1 complex	simple:Q14031	complex:a11b1 complex	COL4A6		TRUE	FALSE	FALSE	curated	TRUE	0.006	0.041	0.015	0.002	0.006	0.027	0.062	0.036	0.023	0.026	0.008	0.043	0.017	0.004	0.008	0	0	0	0	0	0.013	0.047	0.021	0.008	0.012
CPI-SC0247E9ADB	COL9A2_a11b1 complex	simple:Q14055	complex:a11b1 complex	COL9A2		TRUE	FALSE	FALSE	curated	TRUE	0.01	0.045	0.019	0.006	0.01	0.038	0.073	0.047	0.034	0.038	0.012	0.047	0.021	0.008	0.012	0.006	0.041	0.015	0.002	0.006	0.073	0.108	0.082	0.069	0.073
CPI-SC0035F0B0F	COL19A1_a11b1 complex	simple:Q14993	complex:a11b1 complex	COL19A1		TRUE	FALSE	FALSE	curated	TRUE	0.027	0.062	0.036	0.023	0.026	0.9	0.934	0.908	0.895	0.899	0.114	0.149	0.123	0.11	0.113	0.065	0.1	0.073	0.06	0.064	0.042	0.077	0.051	0.037	0.041
CPI-SC069F9E62C	COL28A1_a11b1 complex	simple:Q2UY09	complex:a11b1 complex	COL28A1		TRUE	FALSE	FALSE	curated	TRUE	0.006	0.04	0.014	0.001	0.005	0.013	0.048	0.022	0.009	0.013	0.01	0.045	0.019	0.006	0.01	0	0	0	0	0	0.01	0.045	0.019	0.006	0.01
CPI-SC0D2BDC009	COL13A1_a11b1 complex	simple:Q5TAT6	complex:a11b1 complex	COL13A1		FALSE	FALSE	FALSE	curated	TRUE	0.006	0.04	0.014	0.001	0.005	0.017	0.051	0.025	0.012	0.016	0.007	0.042	0.016	0.002	0.006	0	0	0	0	0	0.008	0.043	0.017	0.003	0.007
CPI-SC05F111D21	COL27A1_a11b1 complex	simple:Q8IZC6	complex:a11b1 complex	COL27A1		TRUE	FALSE	FALSE	curated	TRUE	0.008	0.043	0.017	0.003	0.007	0.023	0.058	0.032	0.019	0.023	0.061	0.096	0.07	0.057	0.061	0.336	0.371	0.345	0.332	0.336	0.233	0.268	0.242	0.229	0.233
CPI-SC041215790	COL26A1_a11b1 complex	simple:Q96A83	complex:a11b1 complex	COL26A1		TRUE	FALSE	FALSE	curated	TRUE	0.011	0.046	0.02	0.006	0.01	0.308	0.343	0.317	0.304	0.308	0.026	0.061	0.035	0.022	0.026	0.025	0.06	0.034	0.02	0.024	0.032	0.067	0.041	0.028	0.032
CPI-SC05B2AA866	COL12A1_a11b1 complex	simple:Q99715	complex:a11b1 complex	COL12A1		TRUE	FALSE	FALSE	curated	TRUE	0.008	0.043	0.017	0.003	0.007	0.071	0.106	0.08	0.067	0.071	0.034	0.068	0.042	0.029	0.033	0.016	0.051	0.025	0.012	0.016	0.013	0.047	0.021	0.008	0.012
CPI-SC051B1E9C4	COL20A1_a11b1 complex	simple:Q9P218	complex:a11b1 complex	COL20A1		TRUE	FALSE	FALSE	curated	TRUE	0.011	0.046	0.02	0.007	0.011	0.033	0.067	0.041	0.028	0.032	0.017	0.052	0.026	0.013	0.017	0.009	0.044	0.018	0.005	0.009	0.042	0.077	0.051	0.037	0.041
CPI-SC0247375A7	COL17A1_a11b1 complex	simple:Q9UMD9	complex:a11b1 complex	COL17A1		TRUE	FALSE	FALSE	curated	TRUE	0.006	0.041	0.015	0.002	0.006	0.01	0.044	0.018	0.005	0.009	0.006	0.041	0.015	0.002	0.006	0	0	0	0	0	0	0	0	0	0
CPI-SC0B808E56A	COL6A6_a1b1 complex	simple:A6NMZ7	complex:a1b1 complex	COL6A6		TRUE	FALSE	FALSE	curated	TRUE	0.004	0.051	0.025	0.007	0	0.031	0.078	0.052	0.034	0	0	0	0	0	0	0.005	0.052	0.026	0.007	0	0.015	0.062	0.036	0.018	0
CPI-SC089D4762F	COL6A5_a1b1 complex	simple:A8TX70	complex:a1b1 complex	COL6A5		TRUE	FALSE	FALSE	curated	TRUE	0.003	0.05	0.024	0.006	0	0.007	0.053	0.028	0.009	0	0.004	0.051	0.025	0.006	0	0	0	0	0	0	0	0	0	0	0
CPI-SC0F73E9099	COL1A1_a1b1 complex	simple:P02452	complex:a1b1 complex	COL1A1		TRUE	FALSE	FALSE	curated	TRUE	0.003	0.05	0.024	0.006	0	0.005	0.052	0.026	0.007	0	0.046	0.092	0.066	0.048	0	0	0	0	0	0	0	0	0	0	0
CPI-SC016235D3A	COL2A1_a1b1 complex	simple:P02458	complex:a1b1 complex	COL2A1		TRUE	FALSE	FALSE	curated	TRUE	0.007	0.053	0.027	0.009	0	0.008	0.055	0.029	0.01	0	0.004	0.051	0.025	0.006	0	0.004	0.051	0.025	0.006	0	0.006	0.052	0.026	0.008	0
CPI-SC0BC63F8C0	COL3A1_a1b1 complex	simple:P02461	complex:a1b1 complex	COL3A1		TRUE	FALSE	FALSE	curated	TRUE	0.004	0.05	0.024	0.006	0	0.01	0.056	0.031	0.012	0	0.004	0.051	0.025	0.006	0	0	0	0	0	0	0.006	0.052	0.026	0.008	0
CPI-SC0672FBD31	COL4A1_a1b1 complex	simple:P02462	complex:a1b1 complex	COL4A1		TRUE	FALSE	FALSE	curated	TRUE	0.008	0.055	0.029	0.011	0	0.22	0.267	0.241	0.222	0	0.041	0.087	0.061	0.043	0	0.017	0.064	0.038	0.019	0	0.032	0.079	0.053	0.035	0
CPI-SC0545E2502	COL5A2_a1b1 complex	simple:P05997	complex:a1b1 complex	COL5A2		TRUE	FALSE	FALSE	curated	TRUE	0.008	0.055	0.029	0.01	0	0.106	0.153	0.127	0.108	0	0.034	0.081	0.055	0.037	0	0.008	0.054	0.029	0.01	0	0.006	0.052	0.026	0.008	0
CPI-SC006E22794	COL1A2_a1b1 complex	simple:P08123	complex:a1b1 complex	COL1A2		TRUE	FALSE	FALSE	curated	TRUE	0.008	0.055	0.029	0.011	0	0.01	0.057	0.031	0.012	0	0.067	0.113	0.087	0.069	0	0.004	0.051	0.025	0.006	0	0	0	0	0	0
CPI-SC0458F68A5	COL4A2_a1b1 complex	simple:P08572	complex:a1b1 complex	COL4A2		TRUE	FALSE	FALSE	curated	TRUE	0.009	0.055	0.03	0.011	0	0.386	0.433	0.407	0.389	0	0.092	0.139	0.113	0.094	0	0.022	0.068	0.043	0.024	0	0.069	0.115	0.09	0.071	0
CPI-SC06E5E0C83	COL11A1_a1b1 complex	simple:P12107	complex:a1b1 complex	COL11A1		TRUE	FALSE	FALSE	curated	TRUE	0.03	0.076	0.05	0.032	0	1.571	1.618	1.592	1.574	0	0.179	0.225	0.2	0.181	0	0.089	0.136	0.11	0.092	0	0.375	0.421	0.395	0.377	0
CPI-SC09FDA4F45	COL6A1_a1b1 complex	simple:P12109	complex:a1b1 complex	COL6A1		TRUE	FALSE	FALSE	curated	TRUE	0.004	0.05	0.024	0.006	0	0.025	0.071	0.045	0.027	0	0.004	0.051	0.025	0.006	0	0	0	0	0	0	0.008	0.055	0.029	0.01	0
CPI-SC0F4BC2909	COL6A2_a1b1 complex	simple:P12110	complex:a1b1 complex	COL6A2		TRUE	FALSE	FALSE	curated	TRUE	0.005	0.052	0.026	0.008	0	0.009	0.056	0.03	0.012	0	0	0	0	0	0	0.004	0.051	0.025	0.006	0	0	0	0	0	0
CPI-SC02AE206BE	COL6A3_a1b1 complex	simple:P12111	complex:a1b1 complex	COL6A3		TRUE	FALSE	FALSE	curated	TRUE	0.021	0.067	0.042	0.023	0	0.01	0.057	0.031	0.013	0	0.007	0.053	0.028	0.009	0	0.012	0.058	0.032	0.014	0	0.013	0.06	0.034	0.015	0
CPI-SC0A8E69BC5	COL11A2_a1b1 complex	simple:P13942	complex:a1b1 complex	COL11A2		TRUE	FALSE	FALSE	curated	TRUE	0.038	0.084	0.058	0.04	0	0.037	0.083	0.057	0.039	0	0.109	0.156	0.13	0.111	0	0.01	0.056	0.03	0.012	0	0.217	0.263	0.238	0.219	0
CPI-SC05B6D413B	COL9A1_a1b1 complex	simple:P20849	complex:a1b1 complex	COL9A1		TRUE	FALSE	FALSE	curated	TRUE	0.019	0.065	0.04	0.021	0	0.007	0.053	0.028	0.009	0	0.005	0.052	0.026	0.008	0	0	0	0	0	0	0.103	0.149	0.123	0.105	0
CPI-SC05992FDC8	COL5A1_a1b1 complex	simple:P20908	complex:a1b1 complex	COL5A1		TRUE	FALSE	FALSE	curated	TRUE	0.004	0.05	0.025	0.006	0	0.029	0.076	0.05	0.032	0	0.012	0.058	0.032	0.014	0	0.004	0.051	0.025	0.006	0	0.025	0.072	0.046	0.027	0
CPI-SC069F95780	COL8A2_a1b1 complex	simple:P25067	complex:a1b1 complex	COL8A2		TRUE	FALSE	FALSE	curated	TRUE	0.004	0.05	0.024	0.006	0	0.009	0.056	0.03	0.012	0	0.005	0.051	0.025	0.007	0	0	0	0	0	0	0.006	0.052	0.026	0.008	0
CPI-SC0DAD29856	COL5A3_a1b1 complex	simple:P25940	complex:a1b1 complex	COL5A3		TRUE	FALSE	FALSE	curated	TRUE	0.009	0.055	0.029	0.011	0	0.029	0.076	0.05	0.031	0	0.174	0.22	0.195	0.176	0	0.005	0.052	0.026	0.007	0	0.234	0.28	0.255	0.236	0
CPI-SC02F06FF62	COL8A1_a1b1 complex	simple:P27658	complex:a1b1 complex	COL8A1		TRUE	FALSE	FALSE	curated	TRUE	0.006	0.052	0.026	0.008	0	0.13	0.177	0.151	0.132	0	0.015	0.062	0.036	0.018	0	0.014	0.061	0.035	0.017	0	0	0	0	0	0
CPI-SC0EC572716	COL4A5_a1b1 complex	simple:P29400	complex:a1b1 complex	COL4A5		TRUE	FALSE	FALSE	curated	TRUE	0.01	0.057	0.031	0.012	0	0.173	0.219	0.194	0.175	0	0.153	0.199	0.173	0.155	0	0.013	0.059	0.033	0.015	0	0.008	0.055	0.029	0.01	0
CPI-SC0F8D27FBC	COL15A1_a1b1 complex	simple:P39059	complex:a1b1 complex	COL15A1		TRUE	FALSE	FALSE	curated	TRUE	0.015	0.062	0.036	0.017	0	0.064	0.11	0.084	0.066	0	0.007	0.054	0.028	0.01	0	0.077	0.123	0.097	0.079	0	0.011	0.057	0.031	0.013	0
CPI-SC0EA3FC100	COL18A1_a1b1 complex	simple:P39060	complex:a1b1 complex	COL18A1		TRUE	FALSE	FALSE	curated	TRUE	0.004	0.05	0.025	0.006	0	0.047	0.094	0.068	0.05	0	0.005	0.051	0.025	0.007	0	0	0	0	0	0	0.074	0.12	0.094	0.076	0
CPI-SC091173D82	COL4A4_a1b1 complex	simple:P53420	complex:a1b1 complex	COL4A4		TRUE	FALSE	FALSE	curated	TRUE	0.006	0.053	0.027	0.008	0	0.048	0.095	0.069	0.05	0	0.009	0.055	0.03	0.011	0	0.006	0.053	0.027	0.008	0	0.015	0.062	0.036	0.018	0
CPI-SC07FB88720	COL4A3_a1b1 complex	simple:Q01955	complex:a1b1 complex	COL4A3		TRUE	FALSE	FALSE	curated	TRUE	0.004	0.051	0.025	0.006	0	0.016	0.062	0.037	0.018	0	0.008	0.055	0.029	0.011	0	0.004	0.051	0.025	0.006	0	0	0	0	0	0
CPI-SC0BD4C290F	COL14A1_a1b1 complex	simple:Q05707	complex:a1b1 complex	COL14A1		TRUE	FALSE	FALSE	curated	TRUE	0.005	0.051	0.025	0.007	0	0.031	0.078	0.052	0.034	0	0.008	0.055	0.029	0.011	0	0.017	0.064	0.038	0.019	0	0	0	0	0	0
CPI-SC053BBE2B1	COL16A1_a1b1 complex	simple:Q07092	complex:a1b1 complex	COL16A1		TRUE	FALSE	FALSE	curated	TRUE	0.061	0.107	0.081	0.063	0	0.221	0.267	0.241	0.223	0	0.153	0.199	0.173	0.155	0	0.019	0.066	0.04	0.021	0	0.176	0.222	0.196	0.178	0
CPI-SC0DA5EFA18	COL4A6_a1b1 complex	simple:Q14031	complex:a1b1 complex	COL4A6		TRUE	FALSE	FALSE	curated	TRUE	0.004	0.051	0.025	0.007	0	0.025	0.071	0.046	0.027	0	0.006	0.053	0.027	0.008	0	0	0	0	0	0	0.011	0.057	0.031	0.013	0
CPI-SC0F590482E	COL9A2_a1b1 complex	simple:Q14055	complex:a1b1 complex	COL9A2		TRUE	FALSE	FALSE	curated	TRUE	0.008	0.055	0.029	0.01	0	0.036	0.083	0.057	0.038	0	0.01	0.057	0.031	0.013	0	0.004	0.051	0.025	0.006	0	0.071	0.118	0.092	0.074	0
CPI-SC0BA41B0D3	COL19A1_a1b1 complex	simple:Q14993	complex:a1b1 complex	COL19A1		TRUE	FALSE	FALSE	curated	TRUE	0.025	0.071	0.046	0.027	0	0.898	0.944	0.918	0.9	0	0.112	0.158	0.133	0.114	0	0.063	0.109	0.083	0.065	0	0.04	0.086	0.06	0.042	0
CPI-SC0FF018913	COL28A1_a1b1 complex	simple:Q2UY09	complex:a1b1 complex	COL28A1		TRUE	FALSE	FALSE	curated	TRUE	0.004	0.05	0.024	0.006	0	0.011	0.058	0.032	0.014	0	0.008	0.055	0.029	0.011	0	0	0	0	0	0	0.008	0.055	0.029	0.01	0
CPI-SC08BF895FC	COL13A1_a1b1 complex	simple:Q5TAT6	complex:a1b1 complex	COL13A1		FALSE	FALSE	FALSE	curated	TRUE	0.003	0.05	0.024	0.006	0	0.014	0.061	0.035	0.017	0	0.005	0.051	0.025	0.007	0	0	0	0	0	0	0.006	0.052	0.026	0.008	0
CPI-SC0D7F33CFB	COL27A1_a1b1 complex	simple:Q8IZC6	complex:a1b1 complex	COL27A1		TRUE	FALSE	FALSE	curated	TRUE	0.006	0.052	0.026	0.008	0	0.021	0.068	0.042	0.024	0	0.059	0.106	0.08	0.061	0	0.334	0.381	0.355	0.337	0	0.231	0.278	0.252	0.234	0
CPI-SC0EACF2D60	COL26A1_a1b1 complex	simple:Q96A83	complex:a1b1 complex	COL26A1		TRUE	FALSE	FALSE	curated	TRUE	0.009	0.055	0.029	0.011	0	0.306	0.353	0.327	0.308	0	0.024	0.071	0.045	0.027	0	0.023	0.069	0.043	0.025	0	0.03	0.077	0.051	0.032	0
CPI-SC004A436C5	COL12A1_a1b1 complex	simple:Q99715	complex:a1b1 complex	COL12A1		TRUE	FALSE	FALSE	curated	TRUE	0.006	0.052	0.027	0.008	0	0.069	0.116	0.09	0.072	0	0.031	0.078	0.052	0.034	0	0.014	0.061	0.035	0.017	0	0.011	0.057	0.031	0.013	0
CPI-SC00BE2EEE3	COL20A1_a1b1 complex	simple:Q9P218	complex:a1b1 complex	COL20A1		TRUE	FALSE	FALSE	curated	TRUE	0.009	0.056	0.03	0.011	0	0.031	0.077	0.051	0.033	0	0.015	0.062	0.036	0.018	0	0.007	0.054	0.028	0.009	0	0.04	0.086	0.06	0.042	0
CPI-SC08AA91C84	COL17A1_a1b1 complex	simple:Q9UMD9	complex:a1b1 complex	COL17A1		TRUE	FALSE	FALSE	curated	TRUE	0.004	0.05	0.025	0.006	0	0.008	0.054	0.028	0.01	0	0.004	0.051	0.025	0.006	0	0	0	0	0	0	0	0	0	0	0
CPI-SC0EAF80261	SEMA7A_a1b1 complex	simple:O75326	complex:a1b1 complex	SEMA7A		FALSE	FALSE	FALSE	curated	TRUE	0.062	0.109	0.083	0.065	0	0.184	0.231	0.205	0.187	0	0.043	0.09	0.064	0.046	0	0.033	0.08	0.054	0.035	0	0.054	0.101	0.075	0.057	0
CPI-SC05D87F723	COL6A6_a2b1 complex	simple:A6NMZ7	complex:a2b1 complex	COL6A6		TRUE	FALSE	FALSE	curated	TRUE	0.005	0.043	0.022	0.002	0.008	0.032	0.07	0.049	0.029	0.036	0	0	0	0	0	0.006	0.044	0.022	0.003	0.009	0.016	0.054	0.033	0.013	0.019
CPI-SC0606C6896	COL6A5_a2b1 complex	simple:A8TX70	complex:a2b1 complex	COL6A5		TRUE	FALSE	FALSE	curated	TRUE	0.004	0.042	0.021	0.001	0.007	0.008	0.045	0.024	0.005	0.011	0.005	0.042	0.021	0.002	0.008	0	0	0	0	0	0	0	0	0	0
CPI-SC01EA4FF6B	COL1A1_a2b1 complex	simple:P02452	complex:a2b1 complex	COL1A1		TRUE	FALSE	FALSE	curated	TRUE	0.004	0.042	0.021	0.001	0.007	0.006	0.043	0.022	0.003	0.009	0.046	0.084	0.063	0.043	0.05	0	0	0	0	0	0	0	0	0	0
CPI-SC036D78A43	COL2A1_a2b1 complex	simple:P02458	complex:a2b1 complex	COL2A1		TRUE	FALSE	FALSE	curated	TRUE	0.007	0.045	0.024	0.004	0.011	0.009	0.047	0.025	0.006	0.012	0.005	0.042	0.021	0.002	0.008	0.005	0.043	0.021	0.002	0.008	0.006	0.044	0.023	0.003	0.01
CPI-SC054484F7B	COL3A1_a2b1 complex	simple:P02461	complex:a2b1 complex	COL3A1		TRUE	FALSE	FALSE	curated	TRUE	0.004	0.042	0.021	0.001	0.008	0.01	0.048	0.027	0.007	0.014	0.005	0.042	0.021	0.002	0.008	0	0	0	0	0	0.006	0.044	0.023	0.003	0.01
CPI-SC02392F4AF	COL4A1_a2b1 complex	simple:P02462	complex:a2b1 complex	COL4A1		TRUE	FALSE	FALSE	curated	TRUE	0.009	0.047	0.025	0.006	0.012	0.221	0.258	0.237	0.218	0.224	0.041	0.079	0.058	0.038	0.045	0.018	0.056	0.034	0.015	0.021	0.033	0.071	0.05	0.03	0.036
CPI-SC01FFC9392	FN1_a2b1 complex	simple:P02751	complex:a2b1 complex	FN1		TRUE	FALSE	FALSE	curated	TRUE	0.004	0.042	0.021	0.001	0.008	0.014	0.051	0.03	0.011	0.017	0.005	0.043	0.022	0.002	0.009	0	0	0	0	0	0.011	0.049	0.028	0.008	0.015
CPI-SC0CA7B34A5	COL5A2_a2b1 complex	simple:P05997	complex:a2b1 complex	COL5A2		TRUE	FALSE	FALSE	curated	TRUE	0.009	0.047	0.025	0.006	0.012	0.107	0.144	0.123	0.104	0.11	0.035	0.073	0.051	0.032	0.038	0.009	0.046	0.025	0.006	0.012	0.006	0.044	0.023	0.003	0.01
CPI-SC05CCF815E	COL1A2_a2b1 complex	simple:P08123	complex:a2b1 complex	COL1A2		TRUE	FALSE	FALSE	curated	TRUE	0.009	0.047	0.026	0.006	0.012	0.011	0.048	0.027	0.008	0.014	0.067	0.105	0.084	0.064	0.071	0.005	0.043	0.021	0.002	0.008	0	0	0	0	0
CPI-SC07222A428	COL4A2_a2b1 complex	simple:P08572	complex:a2b1 complex	COL4A2		TRUE	FALSE	FALSE	curated	TRUE	0.009	0.047	0.026	0.007	0.013	0.387	0.425	0.404	0.384	0.39	0.093	0.131	0.109	0.09	0.096	0.022	0.06	0.039	0.019	0.026	0.069	0.107	0.086	0.066	0.073
CPI-SC0FBFA176B	COL11A1_a2b1 complex	simple:P12107	complex:a2b1 complex	COL11A1		TRUE	FALSE	FALSE	curated	TRUE	0.03	0.068	0.047	0.027	0.034	1.572	1.61	1.588	1.569	1.575	0.179	0.217	0.196	0.177	0.183	0.09	0.128	0.107	0.087	0.094	0.375	0.413	0.392	0.372	0.379
CPI-SC08D8A859F	COL6A1_a2b1 complex	simple:P12109	complex:a2b1 complex	COL6A1		TRUE	FALSE	FALSE	curated	TRUE	0.004	0.042	0.021	0.001	0.008	0.025	0.063	0.042	0.022	0.029	0.005	0.042	0.021	0.002	0.008	0	0	0	0	0	0.009	0.047	0.025	0.006	0.012
CPI-SC0814068D9	COL6A2_a2b1 complex	simple:P12110	complex:a2b1 complex	COL6A2		TRUE	FALSE	FALSE	curated	TRUE	0.006	0.044	0.023	0.003	0.009	0.01	0.048	0.026	0.007	0.013	0	0	0	0	0	0.005	0.043	0.021	0.002	0.008	0	0	0	0	0
CPI-SC0D870AE49	COL6A3_a2b1 complex	simple:P12111	complex:a2b1 complex	COL6A3		TRUE	FALSE	FALSE	curated	TRUE	0.021	0.059	0.038	0.018	0.025	0.011	0.049	0.028	0.008	0.015	0.007	0.045	0.024	0.004	0.011	0.012	0.05	0.029	0.009	0.016	0.014	0.051	0.03	0.011	0.017
CPI-SC0E4E54E13	COL11A2_a2b1 complex	simple:P13942	complex:a2b1 complex	COL11A2		TRUE	FALSE	FALSE	curated	TRUE	0.038	0.076	0.055	0.035	0.042	0.037	0.075	0.054	0.034	0.041	0.11	0.147	0.126	0.107	0.113	0.01	0.048	0.027	0.007	0.014	0.217	0.255	0.234	0.215	0.221
CPI-SC08F797F90	COL9A1_a2b1 complex	simple:P20849	complex:a2b1 complex	COL9A1		TRUE	FALSE	FALSE	curated	TRUE	0.02	0.057	0.036	0.017	0.023	0.008	0.045	0.024	0.005	0.011	0.006	0.044	0.023	0.003	0.009	0	0	0	0	0	0.103	0.141	0.12	0.1	0.107
CPI-SC035134F18	COL5A1_a2b1 complex	simple:P20908	complex:a2b1 complex	COL5A1		TRUE	FALSE	FALSE	curated	TRUE	0.005	0.042	0.021	0.002	0.008	0.03	0.068	0.047	0.027	0.034	0.012	0.05	0.029	0.009	0.016	0.005	0.043	0.021	0.002	0.008	0.026	0.064	0.042	0.023	0.029
CPI-SC04B354AE3	COL8A2_a2b1 complex	simple:P25067	complex:a2b1 complex	COL8A2		TRUE	FALSE	FALSE	curated	TRUE	0.004	0.042	0.021	0.001	0.008	0.01	0.048	0.027	0.007	0.013	0.005	0.043	0.022	0.002	0.009	0	0	0	0	0	0.006	0.044	0.023	0.003	0.01
CPI-SC0FC645961	COL5A3_a2b1 complex	simple:P25940	complex:a2b1 complex	COL5A3		TRUE	FALSE	FALSE	curated	TRUE	0.009	0.047	0.026	0.006	0.013	0.03	0.067	0.046	0.027	0.033	0.175	0.212	0.191	0.172	0.178	0.006	0.044	0.022	0.003	0.009	0.234	0.272	0.251	0.232	0.238
CPI-SC058845C44	COL8A1_a2b1 complex	simple:P27658	complex:a2b1 complex	COL8A1		TRUE	FALSE	FALSE	curated	TRUE	0.006	0.044	0.023	0.003	0.01	0.131	0.168	0.147	0.128	0.134	0.016	0.054	0.032	0.013	0.019	0.015	0.053	0.032	0.012	0.018	0	0	0	0	0
CPI-SC09C0B5D08	COL4A5_a2b1 complex	simple:P29400	complex:a2b1 complex	COL4A5		TRUE	FALSE	FALSE	curated	TRUE	0.011	0.049	0.027	0.008	0.014	0.173	0.211	0.19	0.17	0.177	0.153	0.191	0.17	0.15	0.157	0.013	0.051	0.03	0.01	0.017	0.009	0.047	0.025	0.006	0.012
CPI-SC039D075C6	COL15A1_a2b1 complex	simple:P39059	complex:a2b1 complex	COL15A1		TRUE	FALSE	FALSE	curated	TRUE	0.016	0.053	0.032	0.013	0.019	0.064	0.102	0.081	0.061	0.068	0.008	0.046	0.025	0.005	0.012	0.077	0.115	0.094	0.074	0.081	0.011	0.049	0.028	0.008	0.015
CPI-SC04B0064C4	COL18A1_a2b1 complex	simple:P39060	complex:a2b1 complex	COL18A1		TRUE	FALSE	FALSE	curated	TRUE	0.005	0.042	0.021	0.002	0.008	0.048	0.086	0.065	0.045	0.052	0.005	0.043	0.022	0.002	0.009	0	0	0	0	0	0.074	0.112	0.091	0.071	0.078
CPI-SC03DD752AB	COL4A4_a2b1 complex	simple:P53420	complex:a2b1 complex	COL4A4		TRUE	FALSE	FALSE	curated	TRUE	0.007	0.045	0.023	0.004	0.01	0.049	0.087	0.065	0.046	0.052	0.01	0.047	0.026	0.007	0.013	0.007	0.044	0.023	0.004	0.01	0.016	0.054	0.033	0.013	0.019
CPI-SC052A417CB	COL4A3_a2b1 complex	simple:Q01955	complex:a2b1 complex	COL4A3		TRUE	FALSE	FALSE	curated	TRUE	0.005	0.043	0.021	0.002	0.008	0.016	0.054	0.033	0.014	0.02	0.009	0.047	0.025	0.006	0.012	0.005	0.043	0.021	0.002	0.008	0	0	0	0	0
CPI-SC0E0C50FCA	COL14A1_a2b1 complex	simple:Q05707	complex:a2b1 complex	COL14A1		TRUE	FALSE	FALSE	curated	TRUE	0.005	0.043	0.022	0.002	0.009	0.032	0.07	0.049	0.029	0.035	0.009	0.047	0.025	0.006	0.012	0.018	0.056	0.034	0.015	0.021	0	0	0	0	0
CPI-SC01E9FAC20	COL16A1_a2b1 complex	simple:Q07092	complex:a2b1 complex	COL16A1		TRUE	FALSE	FALSE	curated	TRUE	0.061	0.099	0.078	0.058	0.065	0.221	0.259	0.238	0.218	0.225	0.153	0.191	0.17	0.15	0.157	0.02	0.057	0.036	0.017	0.023	0.176	0.214	0.193	0.173	0.18
CPI-SC061137A41	COL4A6_a2b1 complex	simple:Q14031	complex:a2b1 complex	COL4A6		TRUE	FALSE	FALSE	curated	TRUE	0.005	0.043	0.021	0.002	0.008	0.025	0.063	0.042	0.023	0.029	0.007	0.044	0.023	0.004	0.01	0	0	0	0	0	0.011	0.049	0.028	0.008	0.015
CPI-SC08226CD3B	COL9A2_a2b1 complex	simple:Q14055	complex:a2b1 complex	COL9A2		TRUE	FALSE	FALSE	curated	TRUE	0.009	0.047	0.025	0.006	0.012	0.037	0.074	0.053	0.034	0.04	0.011	0.049	0.028	0.008	0.014	0.005	0.043	0.021	0.002	0.008	0.072	0.11	0.088	0.069	0.075
CPI-SC0ADD7BEF0	COL19A1_a2b1 complex	simple:Q14993	complex:a2b1 complex	COL19A1		TRUE	FALSE	FALSE	curated	TRUE	0.026	0.063	0.042	0.023	0.029	0.898	0.936	0.915	0.895	0.902	0.112	0.15	0.129	0.11	0.116	0.063	0.101	0.08	0.06	0.067	0.04	0.078	0.057	0.037	0.044
CPI-SC083EDDA21	COL28A1_a2b1 complex	simple:Q2UY09	complex:a2b1 complex	COL28A1		TRUE	FALSE	FALSE	curated	TRUE	0.004	0.042	0.021	0.001	0.008	0.012	0.05	0.029	0.009	0.015	0.009	0.047	0.025	0.006	0.012	0	0	0	0	0	0.009	0.047	0.025	0.006	0.012
CPI-SC0CCF30377	COL13A1_a2b1 complex	simple:Q5TAT6	complex:a2b1 complex	COL13A1		FALSE	FALSE	FALSE	curated	TRUE	0.004	0.042	0.021	0.001	0.007	0.015	0.053	0.032	0.012	0.018	0.005	0.043	0.022	0.002	0.009	0	0	0	0	0	0.006	0.044	0.023	0.003	0.01
CPI-SC0CE6F5084	COL27A1_a2b1 complex	simple:Q8IZC6	complex:a2b1 complex	COL27A1		TRUE	FALSE	FALSE	curated	TRUE	0.006	0.044	0.023	0.003	0.01	0.022	0.06	0.039	0.019	0.025	0.06	0.097	0.076	0.057	0.063	0.335	0.373	0.352	0.332	0.338	0.232	0.27	0.249	0.229	0.235
CPI-SC0AD6D8724	COL26A1_a2b1 complex	simple:Q96A83	complex:a2b1 complex	COL26A1		TRUE	FALSE	FALSE	curated	TRUE	0.009	0.047	0.026	0.006	0.013	0.307	0.344	0.323	0.304	0.31	0.025	0.063	0.042	0.022	0.028	0.023	0.061	0.04	0.02	0.027	0.031	0.068	0.047	0.028	0.034
CPI-SC0F300DE24	COL12A1_a2b1 complex	simple:Q99715	complex:a2b1 complex	COL12A1		TRUE	FALSE	FALSE	curated	TRUE	0.006	0.044	0.023	0.003	0.01	0.07	0.108	0.087	0.067	0.073	0.032	0.07	0.049	0.029	0.035	0.015	0.053	0.032	0.012	0.018	0.011	0.049	0.028	0.008	0.015
CPI-SC00064A9CE	COL20A1_a2b1 complex	simple:Q9P218	complex:a2b1 complex	COL20A1		TRUE	FALSE	FALSE	curated	TRUE	0.01	0.047	0.026	0.007	0.013	0.031	0.069	0.048	0.028	0.035	0.016	0.054	0.032	0.013	0.019	0.008	0.045	0.024	0.005	0.011	0.04	0.078	0.057	0.037	0.044
CPI-SC06873D10F	COL17A1_a2b1 complex	simple:Q9UMD9	complex:a2b1 complex	COL17A1		TRUE	FALSE	FALSE	curated	TRUE	0.005	0.042	0.021	0.002	0.008	0.008	0.046	0.025	0.005	0.012	0.005	0.042	0.021	0.002	0.008	0	0	0	0	0	0	0	0	0	0
CPI-SC0E3784FFB	LAMC1_a2b1 complex	simple:P11047	complex:a2b1 complex	LAMC1		TRUE	FALSE	FALSE	curated	TRUE	0.164	0.202	0.181	0.161	0.168	0.43	0.468	0.447	0.427	0.434	0.143	0.181	0.159	0.14	0.146	0.057	0.095	0.073	0.054	0.06	0.441	0.479	0.457	0.438	0.444
CPI-SC0D9B795CC	CDH1_a2b1 complex	simple:P12830	complex:a2b1 complex	CDH1		FALSE	FALSE	FALSE	curated	TRUE	0.004	0.042	0.021	0.001	0.008	0.005	0.043	0.022	0.002	0.008	0	0	0	0	0	0	0	0	0	0	0	0	0	0	0
CPI-SC08B6B74FB	FN1_a2Bb3 complex	simple:P02751	complex:a2Bb3 complex	FN1		TRUE	FALSE	FALSE	curated	TRUE	0.005	0.016	0.002	0.001	0.003	0.014	0.025	0.011	0.011	0.012	0.006	0.017	0.003	0.002	0.004	0	0	0	0	0	0.012	0.023	0.009	0.008	0.01
CPI-SC0BAB29E69	F2_a2Bb3 complex	simple:P00734	complex:a2Bb3 complex	F2		TRUE	FALSE	FALSE	curated	TRUE	0.004	0.016	0.002	0.001	0.003	0.007	0.018	0.004	0.003	0.005	0	0	0	0	0	0	0	0	0	0	0.007	0.018	0.004	0.003	0.005
CPI-SC08067D831	VTN_a2Bb3 complex	simple:P04004	complex:a2Bb3 complex	VTN		TRUE	FALSE	FALSE	curated	TRUE	0.006	0.017	0.003	0.002	0.004	0.02	0.031	0.017	0.017	0.018	0.006	0.018	0.004	0.003	0.005	0.006	0.017	0.003	0.003	0.004	0	0	0	0	0
CPI-SC0200AC9E3	THBS1_a2Bb3 complex	simple:P07996	complex:a2Bb3 complex	THBS1		FALSE	FALSE	FALSE	curated	TRUE	0.005	0.016	0.002	0.002	0.003	0.013	0.024	0.01	0.009	0.011	0	0	0	0	0	0.006	0.017	0.003	0.003	0.004	0	0	0	0	0
CPI-SC090855C8E	FN1_aVb3 complex	simple:P02751	complex:aVb3 complex	FN1		TRUE	FALSE	FALSE	curated	TRUE	0.018	0.024	0.01	0.049	0.005	0.027	0.033	0.02	0.058	0.015	0.019	0.025	0.011	0.05	0.006	0	0	0	0	0	0.025	0.031	0.017	0.056	0.012
CPI-SC0B9199C7F	LAMC1_aVb3 complex	simple:P11047	complex:aVb3 complex	LAMC1		TRUE	FALSE	FALSE	curated	TRUE	0.178	0.184	0.17	0.209	0.165	0.444	0.45	0.436	0.475	0.431	0.156	0.162	0.149	0.187	0.144	0.07	0.076	0.063	0.101	0.058	0.454	0.46	0.447	0.485	0.442
CPI-SC0EC380922	F2_aVb3 complex	simple:P00734	complex:aVb3 complex	F2		TRUE	FALSE	FALSE	curated	TRUE	0.018	0.024	0.01	0.048	0.005	0.02	0.026	0.012	0.051	0.007	0	0	0	0	0	0	0	0	0	0	0.02	0.026	0.012	0.051	0.007
CPI-SC0530C27A8	VTN_aVb3 complex	simple:P04004	complex:aVb3 complex	VTN		TRUE	FALSE	FALSE	curated	TRUE	0.019	0.025	0.011	0.049	0.006	0.033	0.039	0.026	0.064	0.021	0.02	0.026	0.012	0.05	0.007	0.019	0.025	0.012	0.05	0.007	0	0	0	0	0
CPI-SC0755598EE	THBS1_aVb3 complex	simple:P07996	complex:aVb3 complex	THBS1		FALSE	FALSE	FALSE	curated	TRUE	0.018	0.024	0.011	0.049	0.006	0.026	0.032	0.018	0.057	0.013	0	0	0	0	0	0.019	0.025	0.012	0.05	0.007	0	0	0	0	0
CPI-SC044E3F9B6	FGF2_aVb3 complex	simple:P09038	complex:aVb3 complex	FGF2		TRUE	FALSE	FALSE	curated	TRUE	0.023	0.029	0.015	0.053	0.01	0.067	0.073	0.059	0.098	0.054	0.089	0.095	0.082	0.12	0.077	0.041	0.047	0.033	0.071	0.028	0.035	0.04	0.027	0.065	0.022
CPI-SC0988E0218	SPP1_aVb3 complex	simple:P10451	complex:aVb3 complex	SPP1		TRUE	FALSE	FALSE	curated	TRUE	0.042	0.048	0.034	0.073	0.029	0.209	0.215	0.202	0.24	0.197	0.055	0.061	0.047	0.086	0.042	0.042	0.048	0.034	0.072	0.029	0.039	0.045	0.032	0.07	0.027
CPI-SC0E2D0DC4B	FGF1_aVb3 complex	simple:P05230	complex:aVb3 complex	FGF1		TRUE	FALSE	FALSE	curated	TRUE	0.26	0.266	0.252	0.291	0.247	1.113	1.119	1.105	1.143	1.1	0.794	0.8	0.786	0.825	0.781	0.119	0.125	0.111	0.149	0.106	0.241	0.247	0.233	0.272	0.228
CPI-SC00756BB93	THY1_aVb3 complex	simple:P04216	complex:aVb3 complex	THY1		FALSE	FALSE	FALSE	curated	TRUE	0.093	0.099	0.085	0.123	0.08	0.828	0.834	0.82	0.859	0.815	0.14	0.145	0.132	0.17	0.127	0.12	0.125	0.112	0.15	0.107	0.102	0.108	0.095	0.133	0.09
CPI-SC0E1037D03	VWF_aVb3 complex	simple:P04275	complex:aVb3 complex	VWF		TRUE	FALSE	FALSE	curated	TRUE	0.021	0.027	0.013	0.051	0.008	0.032	0.038	0.024	0.063	0.019	0.022	0.028	0.015	0.053	0.01	0.026	0.032	0.018	0.057	0.013	0.035	0.04	0.027	0.065	0.022
CPI-SC05A209BEC	FCER2_aVb3 complex	simple:P06734	complex:aVb3 complex	FCER2		TRUE	TRUE	FALSE	curated	TRUE	0.02	0.026	0.012	0.051	0.007	0.044	0.049	0.036	0.074	0.031	0.02	0.026	0.013	0.051	0.008	0.019	0.025	0.012	0.05	0.007	0	0	0	0	0
CPI-SC02E74AFA5	MMP2_aVb3 complex	simple:P08253	complex:aVb3 complex	MMP2		TRUE	FALSE	FALSE	curated	TRUE	0.021	0.027	0.013	0.052	0.008	0.022	0.028	0.014	0.052	0.009	0.02	0.026	0.012	0.05	0.007	0.029	0.035	0.021	0.059	0.016	0.081	0.087	0.073	0.111	0.068
CPI-SC0A58E6695	TNC_aVb3 complex	simple:P24821	complex:aVb3 complex	TNC		TRUE	FALSE	FALSE	curated	TRUE	0.019	0.024	0.011	0.049	0.006	0.03	0.036	0.022	0.061	0.017	0.023	0.029	0.016	0.054	0.01	0	0	0	0	0	0.105	0.111	0.097	0.136	0.092
CPI-SC06525B099	L1CAM_aVb3 complex	simple:P32004	complex:aVb3 complex	L1CAM		FALSE	FALSE	FALSE	curated	TRUE	0.026	0.032	0.018	0.056	0.013	0.223	0.229	0.216	0.254	0.211	0.037	0.042	0.029	0.067	0.024	0.035	0.041	0.027	0.066	0.022	0.088	0.094	0.08	0.119	0.075
CPI-SC095A2C115	PLAUR_aVb3 complex	simple:Q03405	complex:aVb3 complex	PLAUR		TRUE	TRUE	FALSE	curated	TRUE	0.018	0.024	0.01	0.049	0.005	0.02	0.025	0.012	0.05	0.007	0.018	0.024	0.011	0.049	0.006	0.024	0.03	0.016	0.055	0.011	0	0	0	0	0
CPI-SC0EFCE145F	OMD_aVb3 complex	simple:Q99983	complex:aVb3 complex	OMD		TRUE	FALSE	FALSE	curated	TRUE	0.021	0.027	0.013	0.052	0.008	0.029	0.035	0.021	0.059	0.016	0.019	0.025	0.011	0.05	0.006	0.019	0.025	0.012	0.05	0.007	0.022	0.028	0.015	0.053	0.01
CPI-SC04F2478E9	FN1_a3b1 complex	simple:P02751	complex:a3b1 complex	FN1		TRUE	FALSE	FALSE	curated	TRUE	0.011	0.21	0.022	0.013	0.032	0.02	0.22	0.032	0.023	0.041	0.012	0.211	0.023	0.014	0.033	0	0	0	0	0	0.018	0.217	0.029	0.02	0.039
CPI-SC02BFEEC8A	THBS1_a3b1 complex	simple:P07996	complex:a3b1 complex	THBS1		FALSE	FALSE	FALSE	curated	TRUE	0.011	0.211	0.023	0.014	0.032	0.019	0.218	0.03	0.021	0.04	0	0	0	0	0	0.012	0.212	0.024	0.015	0.033	0	0	0	0	0
CPI-SC0ED0520DD	LAMA3_a3b1 complex	simple:Q16787	complex:a3b1 complex	LAMA3		TRUE	FALSE	FALSE	curated	TRUE	0.014	0.213	0.025	0.016	0.035	0.077	0.277	0.089	0.08	0.098	0.016	0.215	0.027	0.018	0.036	0.017	0.217	0.028	0.019	0.038	0.015	0.215	0.027	0.018	0.036
CPI-SC09938698A	CSPG4_a3b1 complex	simple:Q6UVK1	complex:a3b1 complex	CSPG4		FALSE	FALSE	FALSE	curated	TRUE	0.03	0.229	0.041	0.032	0.051	0.021	0.221	0.032	0.023	0.042	0.02	0.22	0.032	0.023	0.041	0.013	0.213	0.025	0.016	0.034	0.846	1.045	0.857	0.848	0.867
CPI-SC06364D669	FN1_a4b1 complex	simple:P02751	complex:a4b1 complex	FN1		TRUE	FALSE	FALSE	curated	TRUE	0.046	0.079	0.019	0.032	0.03	0.055	0.088	0.028	0.041	0.039	0.047	0.08	0.02	0.033	0.031	0	0	0	0	0	0.052	0.085	0.026	0.039	0.036
CPI-SC07BE7830D	SPP1_a4b1 complex	simple:P10451	complex:a4b1 complex	SPP1		TRUE	FALSE	FALSE	curated	TRUE	0.07	0.103	0.043	0.056	0.054	0.237	0.27	0.21	0.223	0.221	0.083	0.116	0.056	0.069	0.067	0.069	0.102	0.042	0.056	0.053	0.067	0.1	0.04	0.053	0.051
CPI-SC0BC542ACC	TNC_a4b1 complex	simple:P24821	complex:a4b1 complex	TNC		TRUE	FALSE	FALSE	curated	TRUE	0.046	0.079	0.019	0.033	0.03	0.058	0.091	0.031	0.044	0.041	0.051	0.084	0.024	0.037	0.035	0	0	0	0	0	0.133	0.166	0.106	0.119	0.117
CPI-SC0E9C058EB	PLAUR_a4b1 complex	simple:Q03405	complex:a4b1 complex	PLAUR		TRUE	TRUE	FALSE	curated	TRUE	0.045	0.078	0.019	0.032	0.029	0.047	0.08	0.02	0.034	0.031	0.046	0.079	0.019	0.032	0.03	0.052	0.085	0.025	0.038	0.036	0	0	0	0	0
CPI-SC0A9EB628A	VCAM1_a4b1 complex	simple:P19320	complex:a4b1 complex	VCAM1		FALSE	FALSE	FALSE	curated	TRUE	0.046	0.079	0.019	0.033	0.03	0.048	0.081	0.021	0.035	0.032	0.102	0.135	0.075	0.089	0.086	0.054	0.087	0.028	0.041	0.038	0	0	0	0	0
CPI-SC070D5A96F	JAM2_a4b1 complex	simple:P57087	complex:a4b1 complex	JAM2		FALSE	FALSE	FALSE	curated	TRUE	0.055	0.088	0.028	0.041	0.039	0.086	0.119	0.06	0.073	0.07	0.562	0.595	0.535	0.548	0.546	0.135	0.168	0.108	0.122	0.119	0.402	0.435	0.375	0.388	0.386
CPI-SC0B4D7E0FF	FN1_a4b7 complex	simple:P02751	complex:a4b7 complex	FN1		TRUE	FALSE	FALSE	curated	TRUE	0.001	0.006	0.004	0.008	0.003	0.011	0.016	0.013	0.017	0.012	0.002	0.007	0.005	0.009	0.004	0	0	0	0	0	0.008	0.013	0.011	0.015	0.01
CPI-SC08E97F7CA	VCAM1_a4b7 complex	simple:P19320	complex:a4b7 complex	VCAM1		FALSE	FALSE	FALSE	curated	TRUE	0.002	0.007	0.005	0.009	0.004	0.004	0.009	0.007	0.011	0.006	0.058	0.063	0.061	0.065	0.06	0.01	0.015	0.013	0.017	0.012	0	0	0	0	0
CPI-SC092C3E4DF	FN1_a8b1 complex	simple:P02751	complex:a8b1 complex	FN1		TRUE	FALSE	FALSE	curated	TRUE	0.006	0.092	0.016	0.007	0.03	0.015	0.101	0.025	0.016	0.039	0.007	0.093	0.017	0.008	0.031	0	0	0	0	0	0.013	0.099	0.023	0.014	0.036
CPI-SC01195CB48	TNC_a8b1 complex	simple:P24821	complex:a8b1 complex	TNC		TRUE	FALSE	FALSE	curated	TRUE	0.007	0.092	0.017	0.008	0.03	0.018	0.104	0.028	0.019	0.041	0.011	0.097	0.021	0.012	0.035	0	0	0	0	0	0.093	0.179	0.103	0.094	0.117
CPI-SC096929DB0	FN1_aVb1 complex	simple:P02751	complex:aVb1 complex	FN1		TRUE	FALSE	FALSE	curated	TRUE	0.094	0.186	0.194	0.234	0.284	0.103	0.195	0.204	0.243	0.294	0.095	0.187	0.195	0.235	0.285	0	0	0	0	0	0.1	0.193	0.201	0.241	0.291
CPI-SC067AD890A	VTN_aVb1 complex	simple:P04004	complex:aVb1 complex	VTN		TRUE	FALSE	FALSE	curated	TRUE	0.094	0.187	0.195	0.235	0.285	0.109	0.202	0.21	0.25	0.3	0.095	0.188	0.196	0.236	0.286	0.095	0.188	0.196	0.236	0.286	0	0	0	0	0
CPI-SC0847A64D2	FN1_aVb5 complex	simple:P02751	complex:aVb5 complex	FN1		TRUE	FALSE	FALSE	curated	TRUE	0.096	0.048	0.271	0.305	0.034	0.106	0.058	0.28	0.314	0.044	0.097	0.049	0.272	0.306	0.035	0	0	0	0	0	0.103	0.055	0.278	0.312	0.041
CPI-SC0EEF3A379	LAMC1_a6b1 complex	simple:P11047	complex:a6b1 complex	LAMC1		TRUE	FALSE	FALSE	curated	TRUE	0.172	0.262	0.354	0.394	0.182	0.438	0.528	0.62	0.66	0.448	0.151	0.241	0.333	0.373	0.161	0.065	0.155	0.247	0.287	0.075	0.449	0.539	0.631	0.671	0.459
CPI-SS0CC5DCE80	CDH1_KLRG1	simple:P12830	simple:Q96E93	CDH1	KLRG1	FALSE	FALSE	TRUE	curated	FALSE	0	0.001	0	0	0.003	0	0.002	0	0	0.004	0	0	0	0	0	0	0	0	0	0	0	0	0	0	0
CPI-SC007890A1C	CDH1_aEb7 complex	simple:P12830	complex:aEb7 complex	CDH1		FALSE	FALSE	FALSE	curated	TRUE	0.001	0.006	0.004	0.008	0.003	0.002	0.007	0.005	0.009	0.004	0	0	0	0	0	0	0	0	0	0	0	0	0	0	0
CPI-SS03DA2A820	FGF2_CD44	simple:P09038	simple:P16070	FGF2	CD44	TRUE	FALSE	TRUE	I2D,InnateDB-All	FALSE	0.011	0.017	0.019	0.015	0.022	0.055	0.062	0.063	0.06	0.067	0.078	0.084	0.085	0.082	0.089	0.029	0.035	0.037	0.033	0.04	0.023	0.029	0.03	0.027	0.034
CPI-SS02AB0C3E0	SPP1_CD44	simple:P10451	simple:P16070	SPP1	CD44	TRUE	FALSE	TRUE	I2D,IMEx,InnateDB-All,IntAct	FALSE	0.03	0.037	0.038	0.035	0.042	0.198	0.204	0.205	0.202	0.209	0.043	0.049	0.051	0.048	0.054	0.03	0.036	0.038	0.034	0.041	0.028	0.034	0.035	0.032	0.039
CPI-SS03722104E	HGF_CD44	simple:P14210	simple:P16070	HGF	CD44	TRUE	FALSE	TRUE	IMEx,InnateDB-All,IntAct	FALSE	0.007	0.013	0.014	0.011	0.018	0.026	0.032	0.033	0.03	0.037	0.006	0.013	0.014	0.011	0.018	0.023	0.03	0.031	0.028	0.035	0.008	0.014	0.016	0.013	0.019
CPI-SS008FB916C	FGF2_FGFR4	simple:P09038	simple:P22455	FGF2	FGFR4	TRUE	FALSE	TRUE	curated	FALSE	0.007	0.007	0	0	0	0.052	0.051	0	0	0	0.074	0.073	0	0	0	0.025	0.025	0	0	0	0.019	0.018	0	0	0
CPI-SS0D9366D11	FGF1_FGFR4	simple:P05230	simple:P22455	FGF1	FGFR4	TRUE	FALSE	TRUE	I2D,IMEx,InnateDB-All,IntAct	FALSE	0.245	0.244	0	0	0	1.097	1.097	0	0	0	0.779	0.778	0	0	0	0.103	0.103	0	0	0	0.225	0.225	0	0	0
CPI-SS0AC594A8E	FGF17_FGFR4	simple:O60258	simple:P22455	FGF17	FGFR4	TRUE	FALSE	TRUE	I2D	FALSE	0.003	0.002	0	0	0	0.005	0.005	0	0	0	0.003	0.002	0	0	0	0	0	0	0	0	0.007	0.006	0	0	0
CPI-SS0D4CA5D92	FGF18_FGFR4	simple:O76093	simple:P22455	FGF18	FGFR4	TRUE	FALSE	TRUE	I2D	FALSE	0.004	0.003	0	0	0	0.056	0.055	0	0	0	0.007	0.006	0	0	0	0.006	0.005	0	0	0	0.007	0.006	0	0	0
CPI-SS05ECF1933	FGF3_FGFR4	simple:P11487	simple:P22455	FGF3	FGFR4	TRUE	FALSE	TRUE	I2D	FALSE	0.003	0.002	0	0	0	0.016	0.015	0	0	0	0.004	0.003	0	0	0	0.004	0.003	0	0	0	0	0	0	0	0
CPI-SS066347638	FGF5_FGFR4	simple:P12034	simple:P22455	FGF5	FGFR4	TRUE	FALSE	TRUE	I2D,IMEx,InnateDB-All,IntAct	FALSE	0.004	0.003	0	0	0	0.031	0.03	0	0	0	0.005	0.004	0	0	0	0	0	0	0	0	0.012	0.011	0	0	0
CPI-SS0D95D41D6	FGF7_FGFR4	simple:P21781	simple:P22455	FGF7	FGFR4	TRUE	FALSE	TRUE	I2D	FALSE	0.005	0.005	0	0	0	0.016	0.015	0	0	0	0.021	0.02	0	0	0	0.004	0.003	0	0	0	0	0	0	0	0
CPI-SS01F67987A	FGF2_FGFR1	simple:P09038	simple:P11362	FGF2	FGFR1	TRUE	FALSE	TRUE	curated	FALSE	0.054	0.606	0.222	0.053	0.107	0.098	0.65	0.267	0.098	0.152	0.12	0.673	0.289	0.12	0.174	0.072	0.624	0.24	0.071	0.125	0.065	0.618	0.234	0.065	0.119
[truncated: 680 more rows]

## Sheet: Mut. pvalues
id_cp_interaction	interacting_pair	partner_a	partner_b	gene_a	gene_b	secreted	receptor_a	receptor_b	annotation_strategy	is_integrin	OL.OL	OL.N	OL.A	OL.M	OL.OP	N.OL	N.N	N.A	N.M	N.OP	A.OL	A.N	A.A	A.M	A.OP	M.OL	M.N	M.A	M.M	M.OP	OP.OL	OP.N	OP.A	OP.M	OP.OP
[truncated: 873 more rows]
