# Supplementary material for: Functional identification of protocadherin alpha 9 (PCDHA9) as a candidate causative gene for amyotrophic lateral sclerosis
Source: Research Square preprint supplement (doi:10.21203/rs.3.rs-2952148/v1), 2023-06-22
Supplement: Supplementary file 16 [file Table S9.xlsx]

## Sheet: Sheet1
ID	genotype	Species	Time	Gender	Sequencing Saturation	Estimated Number of Cells	Cells after QC	Mean Genes/Cell after QC
1	WT	Mus musculus	9 month	Male	40.1%	11416	10739	2182.36
2	Mut	Mus musculus	9 month	Male	53.7%	11777	11011	2716.05
