# Supplementary material for: Functional identification of protocadherin alpha 9 (PCDHA9) as a candidate causative gene for amyotrophic lateral sclerosis
Source: Research Square preprint supplement (doi:10.21203/rs.3.rs-2952148/v1), 2023-06-22
Supplement: Supplementary file 21 [file table S11..xlsx]

## Sheet: DARs in snATAC-seq
	seqnames	start	end	width	strand	Log2FC	FDR	MeanDiff	annotation	geneChr	geneStart	geneEnd	geneLength	geneStrand	geneId	distanceToTSS	ENSEMBL	SYMBOL	GENENAME
chr14_50903823_50904323	chr14	50903823	50904323	501	*	-1.95217	5.90665e-22	-0.0758621	Downstream (2-3kb)	14	50888582	50897507	8926	2	546611	-6316	ENSMUSG00000090799	Klhl33	kelch-like 33
chr14_55617830_55618330	chr14	55617830	55618330	501	*	-1.90689	2.3666e-17	-0.0632184	Promoter (<=1kb)	14	55618037	55625395	7359	1	56739	0	ENSMUSG00000002324	Rec8	REC8 meiotic recombination protein
chr2_160366913_160367413	chr2	160366913	160367413	501	*	-1.44057	7.71559e-17	-0.0827586	Promoter (<=1kb)	2	160363703	160367065	3363	2	16658	0	ENSMUSG00000074622	Mafb	v-maf musculoaponeurotic fibrosarcoma oncogene family, protein B (avian)
chr14_43924937_43925437	chr14	43924937	43925437	501	*	-2.66297	1.69358e-15	-0.0367816	Promoter (1-2kb)	14	43922898	43923368	471	2	93725	-1569	ENSMUSG00000090166	Ear10	eosinophil-associated, ribonuclease A family, member 10
chr15_102673568_102674068	chr15	102673568	102674068	501	*	-1.53766	1.78447e-14	-0.0678161	Promoter (1-2kb)	15	102662864	102672352	9489	2	67942	-1216	ENSMUSG00000062683	Atp5g2	ATP synthase, H+ transporting, mitochondrial F0 complex, subunit C2 (subunit 9)
chr8_71214628_71215128	chr8	71214628	71215128	501	*	-2.08746	1.67706e-13	-0.0448276	Distal Intergenic	8	71272714	71360713	88000	1	17925	-57586	ENSMUSG00000004677	Myo9b	myosin IXb
chr5_87562917_87563417	chr5	87562917	87563417	501	*	-2.25634	5.42922e-13	-0.0390805	Intron (ENSMUST00000113314.2/53315, intron 4 of 7)	5	87554645	87569027	14383	2	53315	5610	ENSMUSG00000029273	Sult1d1	sulfotransferase family 1D, member 1
chr12_18609785_18610285	chr12	18609785	18610285	501	*	-1.44746	5.58332e-13	-0.0655172	Distal Intergenic	12	18514510	18535254	20745	1	236366	95275	ENSMUSG00000073197	5730507C01Rik	RIKEN cDNA 5730507C01 gene
chr10_121461468_121461968	chr10	121461468	121461968	501	*	-1.69515	1.04987e-12	-0.054023	Exon (ENSMUST00000219500.1/192678, exon 1 of 4)	10	121410350	121476347	65998	2	192678	14379	ENSMUSG00000025795	Rassf3	Ras association (RalGDS/AF-6) domain family member 3
chr1_52669034_52669534	chr1	52669034	52669534	501	*	-3	1.06178e-12	-0.0241379	Exon (ENSMUST00000149887.1/98682, exon 1 of 4)	1	52630703	52651919	21217	1	227094	38331	ENSMUSG00000043015	Nemp2	nuclear envelope integral membrane protein 2
chr6_5382498_5382998	chr6	5382498	5382998	501	*	-1.85798	1.06178e-12	-0.0482759	Promoter (<=1kb)	6	5383386	5433022	49637	1	65255	-388	ENSMUSG00000042607	Asb4	ankyrin repeat and SOCS box-containing 4
chr9_48765164_48765664	chr9	48765164	48765664	501	*	-3.24793	1.27766e-12	-0.0195402	Intron (ENSMUST00000093852.4/235320, intron 2 of 6)	9	48654297	48836222	181926	2	235320	70558	ENSMUSG00000066687	Zbtb16	zinc finger and BTB domain containing 16
chr5_109996235_109996735	chr5	109996235	109996735	501	*	-1.62619	1.81989e-12	-0.0551724	Promoter (<=1kb)	5	109996521	110010411	13891	1	69504	0	ENSMUSG00000066613	Zfp932	zinc finger protein 932
chr7_82865411_82865911	chr7	82865411	82865911	501	*	-1.60666	2.38376e-11	-0.0517241	Promoter (1-2kb)	7	82867333	82871515	4183	1	108797	-1422	ENSMUSG00000057706	Mex3b	mex3 RNA binding family member B
chr5_135133790_135134290	chr5	135133790	135134290	501	*	-1.91427	3.85059e-11	-0.0413793	3' UTR	5	135149657	135165760	16104	1	27368	-15367	ENSMUSG00000005374	Tbl2	transducin (beta)-like 2
chr15_36066579_36067079	chr15	36066579	36067079	501	*	-2.70044	3.85736e-11	-0.0252874	Intron (ENSMUST00000172831.7/626596, intron 14 of 27)	15	36009479	36140400	130922	2	626596	73321	ENSMUSG00000037627	Rgs22	regulator of G-protein signalling 22
chr2_71786508_71787008	chr2	71786508	71787008	501	*	-2.70044	3.85736e-11	-0.0252874	5' UTR	2	71745616	71858416	112801	1	16403	40892	ENSMUSG00000027111	Itga6	integrin alpha 6
chrX_73678779_73679279	chrX	73678779	73679279	501	*	-2.70044	3.85736e-11	-0.0252874	3' UTR	20	73673150	73682502	9353	1	102857	5629	ENSMUSG00000019558	Slc6a8	solute carrier family 6 (neurotransmitter transporter, creatine), member 8
chr1_173366873_173367373	chr1	173366873	173367373	501	*	-1.32193	4.3615e-11	-0.062069	Promoter (<=1kb)	1	173333258	173367695	34438	2	94332	322	ENSMUSG00000005338	Cadm3	cell adhesion molecule 3
chr11_87847872_87848372	chr11	87847872	87848372	501	*	-2.53605	5.3557e-11	-0.0275862	Distal Intergenic	11	87853215	87863803	10589	1	380718	-4843	ENSMUSG00000034121	Mks1	MKS transition zone complex subunit 1
chr8_125898060_125898560	chr8	125898060	125898560	501	*	-1.08453	5.3557e-11	-0.0747126	Promoter (<=1kb)	8	125751508	125898317	146810	2	270109	0	ENSMUSG00000060212	Pcnx2	pecanex homolog 2
chr12_18514129_18514629	chr12	18514129	18514629	501	*	-1.63227	7.6261e-11	-0.0482759	Promoter (<=1kb)	12	18514510	18535254	20745	1	236366	0	ENSMUSG00000073197	5730507C01Rik	RIKEN cDNA 5730507C01 gene
chr7_144582200_144582700	chr7	144582200	144582700	501	*	-1.11757	9.15074e-11	-0.0712644	Promoter (<=1kb)	7	144577318	144582463	5146	2	14082	0	ENSMUSG00000031077	Fadd	Fas (TNFRSF6)-associated via death domain
chr13_119631736_119632236	chr13	119631736	119632236	501	*	-1.8365	1.1155e-10	-0.0413793	Intron (ENSMUST00000099241.3/56838, intron 1 of 2)	13	119623819	119654359	30541	1	56838	7917	ENSMUSG00000074715	Ccl28	chemokine (C-C motif) ligand 28
chr9_55511983_55512483	chr9	55511983	55512483	501	*	-1.19878	1.39971e-10	-0.0655172	Promoter (<=1kb)	9	55454508	55512243	57736	2	110842	0	ENSMUSG00000032314	Etfa	electron transferring flavoprotein, alpha polypeptide
chr10_61080179_61080679	chr10	61080179	61080679	501	*	-3.08746	1.74831e-10	-0.0172414	Distal Intergenic	10	61089331	61094324	4994	1	13180	-8652	ENSMUSG00000020098	Pcbd1	pterin 4 alpha carbinolamine dehydratase/dimerization cofactor of hepatocyte nuclear factor 1 alpha (TCF1) 1
chr13_74011531_74012031	chr13	74011531	74012031	501	*	-3.08746	1.74831e-10	-0.0172414	Promoter (2-3kb)	13	74009407	74035753	26347	1	72948	2124	ENSMUSG00000021573	Tppp	tubulin polymerization promoting protein
chr14_32328373_32328873	chr14	32328373	32328873	501	*	-3.08746	1.74831e-10	-0.0172414	Intron (ENSMUST00000022480.7/239017, intron 4 of 23)	14	32322019	32348151	26133	1	239017	6354	ENSMUSG00000021913	Ogdhl	oxoglutarate dehydrogenase-like
chr11_28694907_28695407	chr11	28694907	28695407	501	*	-2.16993	2.70729e-10	-0.0321839	Distal Intergenic	11	28681564	28693276	11713	1	72818	13343	ENSMUSG00000084966	2810471M01Rik	RIKEN cDNA 2810471M01 gene
chr19_43939961_43940461	chr19	43939961	43940461	501	*	-1.41504	7.51697e-10	-0.0517241	Promoter (<=1kb)	19	43846821	43940191	93371	2	71972	0	ENSMUSG00000025195	Dnmbp	dynamin binding protein
chr3_90051660_90052160	chr3	90051660	90052160	501	*	-1.61005	7.51697e-10	-0.0448276	Promoter (<=1kb)	3	90051636	90065872	14237	1	99650	24	ENSMUSG00000027942	4933434E20Rik	RIKEN cDNA 4933434E20 gene
chr4_148922232_148922732	chr4	148922232	148922732	501	*	-1.61005	7.51697e-10	-0.0448276	Intron (ENSMUST00000094464.9/69743, intron 4 of 15)	4	148947492	148948914	1423	2	108168987	26182	NA	Gm13205	predicted gene 13205
chr11_66416214_66416714	chr11	66416214	66416714	501	*	-1.77761	1.24356e-09	-0.0390805	Intron (ENSMUST00000123454.7/380702, intron 2 of 5)	11	66211725	66525964	314240	2	380702	109250	ENSMUSG00000053930	Shisa6	shisa family member 6
chr14_47395992_47396492	chr14	47395992	47396492	501	*	-2.58496	1.36342e-09	-0.0229885	Intron (ENSMUST00000043296.9/218977, intron 13 of 18)	14	47387779	47418407	30629	2	218977	21915	ENSMUSG00000037544	Dlgap5	DLG associated protein 5
chr15_99507552_99508052	chr15	99507552	99508052	501	*	-2.58496	1.36342e-09	-0.0229885	Intron (ENSMUST00000023750.8/72393, intron 11 of 11)	15	99497012	99528165	31154	2	72393	20113	ENSMUSG00000023011	Faim2	Fas apoptotic inhibitory molecule 2
chr17_25889540_25890040	chr17	25889540	25890040	501	*	-2.58496	1.36342e-09	-0.0229885	Intron (ENSMUST00000166146.7/224624, intron 5 of 7)	17	25877628	25880858	3231	2	215001	-8682	ENSMUSG00000071192	Wfikkn1	WAP, FS, Ig, KU, and NTR-containing protein 1
chr16_35541073_35541573	chr16	35541073	35541573	501	*	-1.15528	1.45076e-09	-0.062069	Promoter (<=1kb)	16	35541145	35664732	123588	1	20357	0	ENSMUSG00000052133	Sema5b	sema domain, seven thrombospondin repeats (type 1 and type 1-like), transmembrane domain (TM) and short cytoplasmic domain, (semaphorin) 5B
chr13_110018306_110018806	chr13	110018306	110018806	501	*	-1.26303	1.71448e-09	-0.0563218	Distal Intergenic	13	109903809	109903888	80	1	100316683	114497	ENSMUSG00000084651	Mir1904	microRNA 1904
chr11_31662079_31662579	chr11	31662079	31662579	501	*	-3	1.94917e-09	-0.016092	Downstream (2-3kb)	11	31665181	31671885	6705	2	69556	9306	ENSMUSG00000044502	Bod1	biorientation of chromosomes in cell division 1
chr2_25464517_25465017	chr2	25464517	25465017	501	*	-4	1.94917e-09	-0.0172414	Downstream (1-2kb)	2	25455141	25461094	5954	2	227622	-3423	ENSMUSG00000047617	Paxx	non-homologous end joining factor
chr9_67875247_67875747	chr9	67875247	67875747	501	*	-4	1.94917e-09	-0.0172414	Intron (ENSMUST00000077879.6/320528, intron 9 of 84)	9	67840396	67995638	155243	1	320528	34851	ENSMUSG00000035284	Vps13c	vacuolar protein sorting 13C
chr17_23592462_23592962	chr17	23592462	23592962	501	*	-1	2.03363e-09	-0.0701149	Intron (ENSMUST00000057029.4/22654, intron 1 of 5)	17	23575844	23599487	23644	2	22654	6525	ENSMUSG00000062012	Zfp13	zinc finger protein 13
chr5_44483385_44483885	chr5	44483385	44483885	501	*	-1.96347	2.37607e-09	-0.0333333	Intron (ENSMUST00000199534.4/16826, intron 5 of 8)	5	44175154	44226626	51473	2	231225	-256759	ENSMUSG00000046985	Tapt1	transmembrane anterior posterior transformation 1
chr5_65177181_65177681	chr5	65177181	65177681	501	*	-1.89812	2.94611e-09	-0.0344828	Distal Intergenic	5	65199696	65260415	60720	1	213081	-22015	ENSMUSG00000037890	Wdr19	WD repeat domain 19
chr15_76925382_76925882	chr15	76925382	76925882	501	*	-1.27753	3.14919e-09	-0.054023	Promoter (<=1kb)	15	76910371	76925448	15078	2	239546	0	ENSMUSG00000054967	Zfp647	zinc finger protein 647
chr18_62922008_62922508	chr18	62922008	62922508	501	*	-1.27753	3.14919e-09	-0.054023	Promoter (<=1kb)	18	62922231	62961179	38949	1	494504	0	ENSMUSG00000071847	Apcdd1	adenomatosis polyposis coli down-regulated 1
chr9_106448901_106449401	chr9	106448901	106449401	501	*	-1.27753	3.14919e-09	-0.054023	Promoter (1-2kb)	9	106440051	106447678	7628	2	68644	-1223	ENSMUSG00000042210	Abhd14a	abhydrolase domain containing 14A
chr11_43682460_43682960	chr11	43682460	43682960	501	*	-1.06904	3.25898e-09	-0.0643678	Promoter (<=1kb)	11	43681998	43721491	39494	1	70802	462	ENSMUSG00000044950	Pwwp2a	PWWP domain containing 2A
chr2_131186629_131187129	chr2	131186629	131187129	501	*	-1.06904	3.25898e-09	-0.0643678	Promoter (<=1kb)	2	131186949	131198497	11549	1	12531	0	ENSMUSG00000027330	Cdc25b	cell division cycle 25B
chr2_136050985_136051485	chr2	136050985	136051485	501	*	-1.16601	3.93199e-09	-0.0586207	Promoter (<=1kb)	2	136052239	136069917	17679	1	76161	-754	ENSMUSG00000027270	Lamp5	lysosomal-associated membrane protein family, member 5
chr7_41598996_41599496	chr7	41598996	41599496	501	*	-1.29373	6.12654e-09	-0.0517241	5' UTR	7	41633203	41651530	18328	1	67607	-33707	ENSMUSG00000074165	Zfp788	zinc finger protein 788
chr16_20671954_20672454	chr16	20671954	20672454	501	*	-2.37851	6.48503e-09	-0.0241379	Intron (ENSMUST00000154594.7/208643, intron 1 of 5)	16	20668313	20692884	24572	1	208643	3641	ENSMUSG00000045983	Eif4g1	eukaryotic translation initiation factor 4, gamma 1
chr2_167496201_167496701	chr2	167496201	167496701	501	*	-2.37851	6.48503e-09	-0.0241379	Intron (ENSMUST00000109214.7/81018, intron 1 of 7)	2	167481133	167492887	11755	2	263876	-3314	ENSMUSG00000047030	Spata2	spermatogenesis associated 2
chr11_104590065_104590565	chr11	104590065	104590565	501	*	-1.61298	6.7059e-09	-0.0402299	Intron (ENSMUST00000136244.1/17896, intron 2 of 2)	11	104608000	104670476	62477	1	16416	-17435	ENSMUSG00000020689	Itgb3	integrin beta 3
chr19_7068838_7069338	chr19	7068838	7069338	501	*	-2.52356	6.7059e-09	-0.0218391	Intron (ENSMUST00000040261.6/107227, intron 3 of 10)	19	7056810	7198057	141248	1	107227	12028	ENSMUSG00000036278	Macrod1	mono-ADP ribosylhydrolase 1
chr5_76998306_76998806	chr5	76998306	76998806	501	*	-1.926	7.61613e-09	-0.0321839	3' UTR	5	77004055	77010606	6552	1	384185	-5249	ENSMUSG00000063820	Arl9	ADP-ribosylation factor-like 9
chr17_8340404_8340904	chr17	8340404	8340904	501	*	-1.80735	9.26105e-09	-0.0344828	Promoter (2-3kb)	17	8337459	8344113	6655	1	320111	2945	ENSMUSG00000055945	Prr18	proline rich 18
chr17_28079562_28080062	chr17	28079562	28080062	501	*	-1.75899	9.26105e-09	-0.0356322	Promoter (<=1kb)	17	28066745	28080639	13895	2	21463	577	ENSMUSG00000062859	Tcp11	t-complex protein 11
chr2_157696175_157696675	chr2	157696175	157696675	501	*	-1.75899	9.26105e-09	-0.0356322	Distal Intergenic	2	157737401	157891614	154214	1	66642	-40726	ENSMUSG00000027649	Ctnnbl1	catenin, beta like 1
chr3_103734665_103735165	chr3	103734665	103735165	501	*	-1.80735	9.26105e-09	-0.0344828	Promoter (2-3kb)	3	103731665	103738001	6337	2	99543	2836	ENSMUSG00000027848	Olfml3	olfactomedin-like 3
chr4_133095107_133095607	chr4	133095107	133095607	501	*	-1.26679	9.26105e-09	-0.0517241	Distal Intergenic	4	133130505	133199756	69252	1	242687	-34898	ENSMUSG00000028868	Wasf2	WASP family, member 2
chr6_85904750_85905250	chr6	85904750	85905250	501	*	-1.71621	9.26105e-09	-0.0367816	Promoter (<=1kb)	6	85899051	85904884	5834	2	75541	0	ENSMUSG00000068299	Nat8f4	N-acetyltransferase 8 (GCN5-related) family member 4
chr9_111497048_111497548	chr9	111497048	111497548	501	*	-1.09115	1.06473e-08	-0.0597701	Distal Intergenic	9	111439081	111489118	50038	1	245038	57967	ENSMUSG00000032500	Dclk3	doublecortin-like kinase 3
chr3_20776390_20776890	chr3	20776390	20776890	501	*	-1.43063	1.16022e-08	-0.0448276	Distal Intergenic	3	20314473	20367177	52705	2	11608	-409213	ENSMUSG00000054988	Agtr1b	angiotensin II receptor, type 1b
chr2_174025373_174025873	chr2	174025373	174025873	501	*	-1.53343	1.19456e-08	-0.0413793	Distal Intergenic	2	174076308	174099771	23464	1	228960	-50435	ENSMUSG00000027522	Stx16	syntaxin 16
chr6_36388424_36388924	chr6	36388424	36388924	501	*	-1.32193	1.51198e-08	-0.0482759	Promoter (<=1kb)	6	36388084	36528414	140331	1	243764	340	ENSMUSG00000045613	Chrm2	cholinergic receptor, muscarinic 2, cardiac
chr17_6186671_6187171	chr17	6186671	6187171	501	*	-2.90689	1.67441e-08	-0.0149425	Intron (ENSMUST00000142030.7/68842, intron 3 of 5)	17	6256860	6308314	51455	1	77106	-69689	ENSMUSG00000038141	Tmem181a	transmembrane protein 181A
chr6_122402188_122402688	chr6	122402188	122402688	501	*	-2.90689	1.67441e-08	-0.0149425	Intron (ENSMUST00000238395.1/ENSMUST00000238395.1, intron 1 of 21)	6	122391379	122392687	1309	1	74269	10809	ENSMUSG00000040657	1700063H04Rik	RIKEN cDNA 1700063H04 gene
chr3_65449243_65449743	chr3	65449243	65449743	501	*	-1.58496	1.75971e-08	-0.0390805	Distal Intergenic	3	65379655	65392623	12969	2	67437	-56620	ENSMUSG00000027828	Ssr3	signal sequence receptor, gamma
chr13_101693987_101694487	chr13	101693987	101694487	501	*	-1.04264	1.7924e-08	-0.0609195	5' UTR	13	101680563	101768217	87655	2	18708	73730	ENSMUSG00000041417	Pik3r1	phosphoinositide-3-kinase regulatory subunit 1
chr1_193370086_193370586	chr1	193370086	193370586	501	*	-1.05889	1.93747e-08	-0.0597701	Promoter (<=1kb)	1	193346346	193370298	23953	2	215303	0	ENSMUSG00000016179	Camk1g	calcium/calmodulin-dependent protein kinase I gamma
chr15_80418121_80418621	chr15	80418121	80418621	501	*	-1.24793	1.96374e-08	-0.0505747	Distal Intergenic	15	80431571	80438603	7033	2	102633578	19982	ENSMUSG00000115888	Gm31369	predicted gene, 31369
chr1_181272837_181273337	chr1	181272837	181273337	501	*	-1.82597	2.78311e-08	-0.0321839	Distal Intergenic	1	181173228	181212001	38774	2	226757	-60836	ENSMUSG00000038733	Wdr26	WD repeat domain 26
chr2_167348469_167348969	chr2	167348469	167348969	501	*	-1.34395	2.79689e-08	-0.045977	Promoter (<=1kb)	2	167298444	167349183	50740	2	56336	214	ENSMUSG00000017929	B4galt5	UDP-Gal:betaGlcNAc beta 1,4-galactosyltransferase, polypeptide 5
chr7_111663143_111663643	chr7	111663143	111663643	501	*	-1.72583	2.79689e-08	-0.0344828	Intron (ENSMUST00000049430.14/233733, intron 1 of 10)	7	111471661	111779977	308317	2	233733	116334	ENSMUSG00000038296	Galnt18	polypeptide N-acetylgalactosaminyltransferase 18
chr15_4043093_4043593	chr15	4043093	4043593	501	*	-2.32193	2.81938e-08	-0.0229885	Intron (ENSMUST00000110690.8/67041, intron 3 of 16)	15	4021686	4027405	5720	2	414066	-15688	NA	BC037032	cDNA Sequence BC037032
chr8_87434483_87434983	chr8	87434483	87434983	501	*	-2.32193	2.81938e-08	-0.0229885	Distal Intergenic	8	87460469	87525554	65086	1	100040294	-25486	ENSMUSG00000097248	Gm2694	predicted gene 2694
chr15_100735549_100736049	chr15	100735549	100736049	501	*	-2.45943	3.47432e-08	-0.0206897	Promoter (2-3kb)	15	100730481	100732737	2257	2	619313	-2812	ENSMUSG00000116504	I730030J21Rik	RIKEN cDNA I730030J21 gene
chr3_53289665_53290165	chr3	53289665	53290165	501	*	-1.53051	3.88907e-08	-0.0390805	Distal Intergenic	3	53448583	53463332	14750	2	212114	173167	ENSMUSG00000042997	Nhlrc3	NHL repeat containing 3
chr7_79742848_79743348	chr7	79742848	79743348	501	*	-1.53051	3.88907e-08	-0.0390805	Promoter (<=1kb)	7	79735957	79743131	7175	2	18631	0	ENSMUSG00000030545	Pex11a	peroxisomal biogenesis factor 11 alpha
chr19_23003965_23004465	chr19	23003965	23004465	501	*	-1.55639	4.76243e-08	-0.037931	Intron (ENSMUST00000236056.1/ENSMUST00000236056.1, intron 1 of 1)	19	23141226	23168134	26909	1	16601	-136761	ENSMUSG00000033863	Klf9	Kruppel-like factor 9
chr5_101826343_101826843	chr5	101826343	101826843	501	*	-1.19794	4.76243e-08	-0.0505747	Distal Intergenic	5	101765130	101823858	58729	1	74596	61213	ENSMUSG00000029330	Cds1	CDP-diacylglycerol synthase 1
chr11_39794328_39794828	chr11	39794328	39794828	501	*	-1.36923	5.08793e-08	-0.0436782	Distal Intergenic	11	40679314	40695203	15890	2	108645	900375	ENSMUSG00000042032	Mat2b	methionine adenosyltransferase II, beta
chr13_37453041_37453541	chr13	37453041	37453541	501	*	-1.36923	5.08793e-08	-0.0436782	Exon (ENSMUST00000187093.1/ENSMUST00000187093.1, exon 1 of 2)	13	37345208	37419036	73829	1	17084	107833	ENSMUSG00000021423	Ly86	lymphocyte antigen 86
chr8_28853115_28853615	chr8	28853115	28853615	501	*	-1.08153	6.77184e-08	-0.0551724	Intron (ENSMUST00000168630.3/210801, intron 3 of 17)	8	28646717	29219636	572920	2	210801	366021	ENSMUSG00000063626	Unc5d	unc-5 netrin receptor D
chr12_21132252_21132752	chr12	21132252	21132752	501	*	-1.38333	6.8843e-08	-0.0425287	Intron (ENSMUST00000174530.1/211914, intron 6 of 9)	12	20990459	21270171	279713	1	211914	141793	ENSMUSG00000052632	Asap2	ArfGAP with SH3 domain, ankyrin repeat and PH domain 2
chr12_86990405_86990905	chr12	86990405	86990905	501	*	-1.10188	6.8843e-08	-0.054023	Promoter (<=1kb)	12	86980763	86990430	9668	2	238331	0	ENSMUSG00000048483	Zdhhc22	zinc finger, DHHC-type containing 22
chr7_45699839_45700339	chr7	45699839	45700339	501	*	-1.10188	6.8843e-08	-0.054023	Promoter (<=1kb)	7	45699843	45704682	4840	1	12348	0	ENSMUSG00000003273	Car11	carbonic anhydrase 11
chr9_63953599_63954099	chr9	63953599	63954099	501	*	-1.91754	6.8843e-08	-0.0287356	Exon (ENSMUST00000041029.5/17130, exon 4 of 4)	9	63953076	64022059	68984	2	17130	67960	ENSMUSG00000036867	Smad6	SMAD family member 6
chr7_80199569_80200069	chr7	80199569	80200069	501	*	-2.16993	6.91419e-08	-0.0241379	Intron (ENSMUST00000032754.8/20352, intron 2 of 14)	7	80186841	80226527	39687	1	20352	12728	ENSMUSG00000030539	Sema4b	sema domain, immunoglobulin domain (Ig), transmembrane domain (TM) and short cytoplasmic domain, (semaphorin) 4B
chr9_48894024_48894524	chr9	48894024	48894524	501	*	-2.16993	6.91419e-08	-0.0241379	Distal Intergenic	9	48899213	48911099	11887	2	15561	16575	ENSMUSG00000032269	Htr3a	5-hydroxytryptamine (serotonin) receptor 3A
chr9_78615485_78615985	chr9	78615485	78615985	501	*	-2.16993	6.91419e-08	-0.0241379	Promoter (<=1kb)	9	78615546	78716253	100708	1	235505	0	ENSMUSG00000046186	Cd109	CD109 antigen
chr1_133953623_133954123	chr1	133953623	133954123	501	*	-1.65208	6.96933e-08	-0.0344828	Distal Intergenic	1	133910304	133921414	11111	2	116847	-32209	ENSMUSG00000041577	Prelp	proline arginine-rich end leucine-rich repeat
chr18_69380465_69380965	chr18	69380465	69380965	501	*	-1.65208	6.96933e-08	-0.0344828	Intron (ENSMUST00000203002.3/21413, intron 3 of 6)	18	69343356	69689079	345724	1	21413	37109	ENSMUSG00000053477	Tcf4	transcription factor 4
chr5_92278579_92279079	chr5	92278579	92279079	501	*	-1.65208	6.96933e-08	-0.0344828	Promoter (<=1kb)	5	92257659	92278170	20512	2	67111	-409	ENSMUSG00000029413	Naaa	N-acylethanolamine acid amidase
chr6_52252834_52253334	chr6	52252834	52253334	501	*	-1.65208	6.96933e-08	-0.0344828	Distal Intergenic	6	52242106	52245810	3705	2	15396	-7024	ENSMUSG00000038210	Hoxa11	homeobox A11
chr4_136836667_136837167	chr4	136836667	136837167	501	*	-1.28011	7.21211e-08	-0.045977	Promoter (<=1kb)	4	136647539	136835988	188450	2	13844	-679	ENSMUSG00000028664	Ephb2	Eph receptor B2
chr13_119736888_119737388	chr13	119736888	119737388	501	*	-1.848	7.38684e-08	-0.0298851	Intron (ENSMUST00000178142.1/245269, intron 1 of 3)	13	119710094	119755882	45789	2	245269	18494	ENSMUSG00000095930	Nim1k	NIM1 serine/threonine protein kinase
chr9_110407404_110407904	chr9	110407404	110407904	501	*	-1.47999	7.38684e-08	-0.0390805	Promoter (<=1kb)	9	110385082	110408213	23132	2	104831	309	ENSMUSG00000036057	Ptpn23	protein tyrosine phosphatase, non-receptor type 23
chr6_83142130_83142630	chr6	83142130	83142630	501	*	-1.04629	7.61115e-08	-0.0563218	5' UTR	6	83135463	83152579	17117	1	20166	6667	ENSMUSG00000034930	Rtkn	rhotekin
chr2_173365377_173365877	chr2	173365377	173365877	501	*	-1.39855	8.35645e-08	-0.0413793	Distal Intergenic	2	173224458	173276533	52076	2	65112	-88844	ENSMUSG00000038400	Pmepa1	prostate transmembrane protein, androgen induced 1
chr9_45555080_45555580	chr9	45555080	45555580	501	*	-1.5025	9.38842e-08	-0.037931	Intron (ENSMUST00000217335.1/114873, intron 5 of 5)	9	45416626	45431730	15105	2	74602	-123350	ENSMUSG00000097074	4833428L15Rik	RIKEN cDNA 4833428L15 gene
chr10_66770319_66770819	chr10	66770319	66770819	501	*	-1.34577	1.12001e-07	-0.0425287	Distal Intergenic	10	66912489	66920258	7770	2	68488	149439	NA	1110002J07Rik	RIKEN cDNA 1110002J07 gene
chr14_62292536_62293036	chr14	62292536	62293036	501	*	-1.34577	1.12001e-07	-0.0425287	Promoter (<=1kb)	14	62292589	62372992	80404	1	67153	0	ENSMUSG00000021932	Rnaseh2b	ribonuclease H2, subunit B
chr17_9764546_9765046	chr17	9764546	9765046	501	*	-1.34577	1.12001e-07	-0.0425287	Intron (ENSMUST00000233804.1/71092, intron 3 of 3)	17	9750751	9775867	25117	2	71092	10821	ENSMUSG00000117264	4930452A19Rik	RIKEN cDNA 4930452A19 gene
chr4_13750397_13750897	chr4	13750397	13750897	501	*	-1.04731	1.12976e-07	-0.0551724	Intron (ENSMUST00000006761.9/12395, intron 1 of 10)	4	13743436	13893649	150214	1	12395	6961	ENSMUSG00000006586	Runx1t1	RUNX1 translocation partner 1
chr1_75256536_75257036	chr1	75256536	75257036	501	*	2.58496	1.1562e-07	0.0172414	Exon (ENSMUST00000027404.11/19275, exon 8 of 23)	1	75247027	75264502	17476	2	19275	7466	ENSMUSG00000026204	Ptprn	protein tyrosine phosphatase, receptor type, N
chr1_181211768_181212268	chr1	181211768	181212268	501	*	-1.06559	1.1562e-07	-0.054023	Promoter (<=1kb)	1	181173228	181212001	38774	2	226757	0	ENSMUSG00000038733	Wdr26	WD repeat domain 26
chr1_193590102_193590602	chr1	193590102	193590602	501	*	-2.26303	1.1562e-07	-0.0218391	Distal Intergenic	1	193507463	193507530	68	2	387201	-82572	ENSMUSG00000065533	Mir205	microRNA 205
chr17_24648204_24648704	chr17	24648204	24648704	501	*	-2.26303	1.1562e-07	-0.0218391	Promoter (1-2kb)	17	24639286	24650327	11042	2	65962	1623	ENSMUSG00000002504	Slc9a3r2	solute carrier family 9 (sodium/hydrogen exchanger), member 3 regulator 2
chr2_30063679_30064179	chr2	30063679	30064179	501	*	-2.58496	1.1562e-07	-0.0172414	Intron (ENSMUST00000134364.7/56086, intron 2 of 6)	2	30057378	30072577	15200	1	56086	6301	ENSMUSG00000054766	Set	SET nuclear oncogene
chr2_167483348_167483848	chr2	167483348	167483848	501	*	-2.26303	1.1562e-07	-0.0218391	3' UTR	2	167492645	167516173	23529	1	81018	-8797	ENSMUSG00000006418	Rnf114	ring finger protein 114
chr3_83789673_83790173	chr3	83789673	83790173	501	*	-1	1.1562e-07	-0.0574713	Exon (ENSMUST00000180472.1/ENSMUST00000180472.1, exon 1 of 3)	3	83766321	83774316	7996	1	20319	23352	ENSMUSG00000027996	Sfrp2	secreted frizzled-related protein 2
chr3_95963662_95964162	chr3	95963662	95964162	501	*	-2.58496	1.1562e-07	-0.0172414	Exon (ENSMUST00000197308.1/ENSMUST00000197308.1, exon 1 of 1)	3	95988429	95996001	7573	2	67220	31839	ENSMUSG00000015745	Plekho1	pleckstrin homology domain containing, family O member 1
chr4_152062125_152062625	chr4	152062125	152062625	501	*	-2.05063	1.1562e-07	-0.0252874	Distal Intergenic	4	152072498	152115400	42903	1	269608	-9873	ENSMUSG00000039713	Plekhg5	pleckstrin homology domain containing, family G (with RhoGef domain) member 5
chr1_39912260_39912760	chr1	39912260	39912760	501	*	-2.80735	1.29184e-07	-0.0137931	Intron (ENSMUST00000163854.8/26921, intron 2 of 30)	1	39900913	40026310	125398	1	26921	11347	ENSMUSG00000026074	Map4k4	mitogen-activated protein kinase kinase kinase kinase 4
chr1_91600613_91601113	chr1	91600613	91601113	501	*	-1.01495	1.29184e-07	-0.0563218	Distal Intergenic	1	91540544	91559589	19046	1	65247	60069	ENSMUSG00000026311	Asb1	ankyrin repeat and SOCS box-containing 1
chr15_80168973_80169473	chr15	80168973	80169473	501	*	-2.80735	1.29184e-07	-0.0137931	Distal Intergenic	15	80173721	80215519	41799	1	17309	-4248	ENSMUSG00000042428	Mgat3	mannoside acetylglucosaminyltransferase 3
chr17_5176304_5176804	chr17	5176304	5176804	501	*	-2.80735	1.29184e-07	-0.0137931	Intron (ENSMUST00000092723.10/239985, intron 4 of 18)	17	4994332	5347656	353325	1	239985	181972	ENSMUSG00000069729	Arid1b	AT rich interactive domain 1B (SWI-like)
chr2_35109682_35110182	chr2	35109682	35110182	501	*	-1.15612	1.29184e-07	-0.0494253	Promoter (<=1kb)	2	35109492	35178822	69331	1	26920	190	ENSMUSG00000057110	Cntrl	centriolin
chr2_156224885_156225385	chr2	156224885	156225385	501	*	-2.80735	1.29184e-07	-0.0137931	Intron (ENSMUST00000145731.7/228829, intron 2 of 3)	2	156196466	156309952	113487	1	228829	28419	ENSMUSG00000038116	Phf20	PHD finger protein 20
chr7_99531526_99532026	chr7	99531526	99532026	501	*	-2.80735	1.29184e-07	-0.0137931	Distal Intergenic	7	99535466	99606771	71306	1	109689	-3440	ENSMUSG00000018909	Arrb1	arrestin, beta 1
chr8_70670766_70671266	chr8	70670766	70671266	501	*	-2.80735	1.29184e-07	-0.0137931	Promoter (1-2kb)	8	70673248	70678752	5505	1	50783	-1982	ENSMUSG00000031848	Lsm4	LSM4 homolog, U6 small nuclear RNA and mRNA degradation associated
chr2_85198248_85198748	chr2	85198248	85198748	501	*	-1.43296	1.32101e-07	-0.0390805	Promoter (1-2kb)	2	85162334	85197197	34864	2	241528	-1051	ENSMUSG00000075224	Lrrc55	leucine rich repeat containing 55
chr1_39899516_39900016	chr1	39899516	39900016	501	*	-2.39232	1.47942e-07	-0.0195402	Promoter (<=1kb)	1	39900913	40026310	125398	1	26921	-897	ENSMUSG00000026074	Map4k4	mitogen-activated protein kinase kinase kinase kinase 4
chr11_117757927_117758427	chr11	117757927	117758427	501	*	-2.39232	1.47942e-07	-0.0195402	Exon (ENSMUST00000026658.12/217351, exon 19 of 22)	11	117782076	117793110	11035	1	217356	-23649	ENSMUSG00000050106	Tmc8	transmembrane channel-like gene family 8
chr12_45465999_45466499	chr12	45465999	45466499	501	*	-1.04836	1.47942e-07	-0.054023	Exon (ENSMUST00000219336.1/ENSMUST00000219336.1, exon 1 of 5)	12	44852484	45074709	222226	2	217517	-391290	ENSMUSG00000046314	Stxbp6	syntaxin binding protein 6 (amisyn)
chr13_51789441_51789941	chr13	51789441	51789941	501	*	-2.39232	1.47942e-07	-0.0195402	Intron (ENSMUST00000110040.8/20354, intron 1 of 16)	13	51685529	51793747	108219	2	20354	3806	ENSMUSG00000021451	Sema4d	sema domain, immunoglobulin domain (Ig), transmembrane domain (TM) and short cytoplasmic domain, (semaphorin) 4D
chr15_34678629_34679129	chr15	34678629	34679129	501	*	-1.04836	1.47942e-07	-0.054023	Promoter (<=1kb)	15	34572799	34679212	106414	2	223473	83	ENSMUSG00000038879	Nipal2	NIPA-like domain containing 2
chr1_36884468_36884968	chr1	36884468	36884968	501	*	-1.9542	1.52169e-07	-0.0264368	Intron (ENSMUST00000027290.11/56030, intron 2 of 40)	1	36792191	36943666	151476	2	56030	58698	ENSMUSG00000026116	Tmem131	transmembrane protein 131
chr6_55461119_55461619	chr6	55461119	55461619	501	*	-1.9542	1.52169e-07	-0.0264368	Exon (ENSMUST00000070736.11/11517, exon 3 of 17)	6	55451978	55501451	49474	1	11517	9141	ENSMUSG00000029778	Adcyap1r1	adenylate cyclase activating polypeptide 1 receptor 1
chr9_41524498_41524998	chr9	41524498	41524998	501	*	-1.61891	1.73691e-07	-0.0333333	Intron (ENSMUST00000233562.1/73144, intron 6 of 6)	9	41531425	41531504	80	1	723892	-6427	ENSMUSG00000093011	Mir100	microRNA 100
chr10_7725727_7726227	chr10	7725727	7726227	501	*	-1.01527	1.79071e-07	-0.0551724	Promoter (<=1kb)	10	7726000	7763150	37151	1	23924	0	ENSMUSG00000019794	Katna1	katanin p60 (ATPase-containing) subunit A1
chr12_20990203_20990703	chr12	20990203	20990703	501	*	-1.37346	1.79552e-07	-0.0402299	Promoter (<=1kb)	12	20990459	21270171	279713	1	211914	0	ENSMUSG00000052632	Asap2	ArfGAP with SH3 domain, ankyrin repeat and PH domain 2
chr1_99611972_99612472	chr1	99611972	99612472	501	*	-1.87447	1.8793e-07	-0.0275862	Distal Intergenic	1	99772765	100485942	713178	1	241175	-160293	ENSMUSG00000067028	Cntnap5b	contactin associated protein-like 5B
chr4_155163882_155164382	chr4	155163882	155164382	501	*	-1.87447	1.8793e-07	-0.0275862	Intron (ENSMUST00000129314.1/20481, intron 1 of 6)	4	155154075	155222592	68518	2	20481	58210	ENSMUSG00000029050	Ski	ski sarcoma viral oncogene homolog (avian)
chr5_100158708_100159208	chr5	100158708	100159208	501	*	-1.65711	1.93293e-07	-0.0321839	Promoter (<=1kb)	5	100077872	100159808	81937	2	231503	600	ENSMUSG00000050640	Tmem150c	transmembrane protein 150C
chr12_29654429_29654929	chr12	29654429	29654929	501	*	-1.70044	2.07321e-07	-0.0310345	Intron (ENSMUST00000218583.1/17933, intron 3 of 24)	12	29675628	29686445	10818	2	328075	31516	ENSMUSG00000112663	C630031E19Rik	RIKEN cDNA C630031E19 gene
chr7_43495282_43495782	chr7	43495282	43495782	501	*	-1.80735	2.07321e-07	-0.0287356	3' UTR	7	43472904	43490075	17172	2	210094	-5207	ENSMUSG00000013367	Iglon5	IgLON family member 5
chr7_60733551_60734051	chr7	60733551	60734051	501	*	-1.80735	2.07321e-07	-0.0287356	Distal Intergenic	7	59982502	60140219	157718	2	20646	-593332	ENSMUSG00000102252	Snrpn	small nuclear ribonucleoprotein N
chr10_9120218_9120718	chr10	9120218	9120718	501	*	-1.47393	2.08506e-07	-0.0367816	Distal Intergenic	10	8722219	8886070	163852	2	70097	-234148	ENSMUSG00000015305	Sash1	SAM and SH3 domain containing 1
chr7_50390349_50390849	chr7	50390349	50390849	501	*	-1.22948	2.20292e-07	-0.0448276	Intron (ENSMUST00000151721.7/338352, intron 8 of 9)	7	50517309	50575971	58663	2	73515	185122	ENSMUSG00000085265	Nell1os	NEL-like 1, opposite strand
chr2_6100414_6100914	chr2	6100414	6100914	501	*	-1.32193	2.2675e-07	-0.0413793	Exon (ENSMUST00000114942.8/227545, exon 4 of 4)	2	6097607	6130211	32605	2	227545	29297	ENSMUSG00000045319	Proser2	proline and serine rich 2
chr17_25955491_25955991	chr17	25955491	25955991	501	*	-2.11548	2.36647e-07	-0.0229885	Promoter (2-3kb)	17	25946387	25952565	6179	2	100034748	-2926	ENSMUSG00000025727	A930017K11Rik	RIKEN cDNA A930017K11 gene
chr13_26464375_26464875	chr13	26464375	26464875	501	*	-1.19555	2.36869e-07	-0.045977	Distal Intergenic	13	26283150	26312406	29257	2	73576	-151969	ENSMUSG00000084811	1700092E19Rik	RIKEN cDNA 1700092E19 gene
chr17_32551009_32551509	chr17	32551009	32551509	501	*	-1.0156	2.583e-07	-0.054023	3' UTR	17	32536558	32551798	15241	1	70101	14451	ENSMUSG00000048440	Cyp4f16	cytochrome P450, family 4, subfamily f, polypeptide 16
chr1_193602603_193603103	chr1	193602603	193603103	501	*	-1.4975	2.62921e-07	-0.0356322	Distal Intergenic	1	193507463	193507530	68	2	387201	-95073	ENSMUSG00000065533	Mir205	microRNA 205
chr5_23843859_23844359	chr5	23843859	23844359	501	*	-1.03242	2.84907e-07	-0.0528736	Promoter (<=1kb)	5	23838944	23844161	5218	2	66169	0	ENSMUSG00000028998	Tomm7	translocase of outer mitochondrial membrane 7
chr11_119355254_119355754	chr11	119355254	119355754	501	*	-1.33442	3.14545e-07	-0.0402299	Promoter (<=1kb)	11	119355557	119381079	25523	1	268512	0	ENSMUSG00000039908	Slc26a11	solute carrier family 26, member 11
chr18_52811316_52811816	chr18	52811316	52811816	501	*	-1.40599	3.15314e-07	-0.037931	Intron (ENSMUST00000115410.8/67847, intron 1 of 10)	18	52825310	52826283	974	1	113939900	-13494	ENSMUSG00000118407	Gm51263	predicted gene, 51263
chr8_34917418_34917918	chr8	34917418	34917918	501	*	-1.52356	3.31411e-07	-0.0344828	Intron (ENSMUST00000033929.5/21951, intron 3 of 26)	8	34826460	34965690	139231	2	21951	47772	ENSMUSG00000031529	Tnks	tankyrase, TRF1-interacting ankyrin-related ADP-ribose polymerase
chr11_117832284_117832784	chr11	117832284	117832784	501	*	-1	3.43137e-07	-0.054023	Exon (ENSMUST00000132298.1/71562, exon 2 of 3)	11	117815526	117826092	10567	2	21877	-6192	ENSMUSG00000025574	Tk1	thymidine kinase 1
chr7_45204401_45204901	chr7	45204401	45204901	501	*	-1.09192	3.526e-07	-0.0494253	Promoter (<=1kb)	7	45183624	45204892	21269	2	384619	0	ENSMUSG00000038292	Kash5	KASH domain containing 5
chr9_57589749_57590249	chr9	57589749	57590249	501	*	-1.11548	3.63911e-07	-0.0482759	Promoter (<=1kb)	9	57589452	57596233	6782	1	71742	297	ENSMUSG00000032308	Ulk3	unc-51-like kinase 3
chr2_102348020_102348520	chr2	102348020	102348520	501	*	-2	3.95054e-07	-0.0241379	Intron (ENSMUST00000102573.7/80985, intron 3 of 4)	2	102300119	102407828	107710	2	80985	59308	ENSMUSG00000027189	Trim44	tripartite motif-containing 44
chr9_56573102_56573602	chr9	56573102	56573602	501	*	-2	3.95054e-07	-0.0241379	Distal Intergenic	9	56418609	56496936	78328	1	66867	154493	ENSMUSG00000032329	Hmg20a	high mobility group 20A
chr14_47939901_47940401	chr14	47939901	47940401	501	*	-2.20163	4.81203e-07	-0.0206897	Intron (ENSMUST00000227343.1/73961, intron 2 of 3)	14	47898851	47944189	45339	1	73961	41050	ENSMUSG00000115609	4930447J18Rik	RIKEN cDNA 4930447J18 gene
chr15_82165238_82165738	chr15	82165238	82165738	501	*	-2.20163	4.81203e-07	-0.0206897	Intron (ENSMUST00000023100.7/20788, intron 1 of 18)	15	82147181	82205379	58199	1	20788	18057	ENSMUSG00000022463	Srebf2	sterol regulatory element binding factor 2
chr2_127656023_127656523	chr2	127656023	127656523	501	*	-2.20163	4.81203e-07	-0.0206897	Promoter (<=1kb)	2	127633226	127656695	23470	2	17153	172	ENSMUSG00000027375	Mal	myelin and lymphocyte protein, T cell differentiation protein
chr5_117045015_117045515	chr5	117045015	117045515	501	*	-1.58496	4.81203e-07	-0.0321839	Distal Intergenic	5	117091680	117116113	24434	2	71954	70598	ENSMUSG00000066900	Suds3	suppressor of defective silencing 3 homolog (S. cerevisiae)
chr9_81631686_81632186	chr9	81631686	81632186	501	*	-1.58496	4.81203e-07	-0.0321839	Promoter (<=1kb)	9	81631551	81645156	13606	1	319405	135	ENSMUSG00000097466	D430036J16Rik	RIKEN cDNA D430036J16 gene
chr15_25805182_25805682	chr15	25805182	25805682	501	*	-1.20811	4.86788e-07	-0.0436782	Exon (ENSMUST00000110457.7/17909, exon 36 of 41)	15	25843180	25973687	130508	1	66270	-37498	ENSMUSG00000022270	Retreg1	reticulophagy regulator 1
chr17_5429357_5429857	chr17	5429357	5429857	501	*	-1.20811	4.86788e-07	-0.0436782	Intron (ENSMUST00000005053.13/70544, intron 3 of 3)	17	5410870	5440259	29390	2	70544	10402	ENSMUSG00000004945	Tmem242	transmembrane protein 242
chr4_152697280_152697780	chr4	152697280	152697780	501	*	-1	4.97265e-07	-0.0528736	Promoter (<=1kb)	4	152697540	152700515	2976	1	330004	0	NA	Gm833	predicted gene 833
chr7_31151524_31152024	chr7	31151524	31152024	501	*	-1	4.97265e-07	-0.0528736	5' UTR	7	31155668	31170641	14974	1	100038516	-3644	ENSMUSG00000100985	Gm10640	predicted gene 10640
chr2_35558107_35558607	chr2	35558107	35558607	501	*	-1.17509	5.09538e-07	-0.0448276	Promoter (<=1kb)	2	35558266	35730994	172729	1	69601	0	ENSMUSG00000026883	Dab2ip	disabled 2 interacting protein
chr10_13968001_13968501	chr10	13968001	13968501	501	*	-1.14543	5.12947e-07	-0.045977	Promoter (1-2kb)	10	13966075	14151374	185300	1	15273	1926	ENSMUSG00000015501	Hivep2	human immunodeficiency virus type I enhancer binding protein 2
chr3_8510206_8510706	chr3	8510206	8510706	501	*	-1.29768	5.12947e-07	-0.0402299	Promoter (<=1kb)	3	8509360	8561606	52247	1	20257	846	ENSMUSG00000027500	Stmn2	stathmin-like 2
chr7_35269671_35270171	chr7	35269671	35270171	501	*	-1.90689	5.12947e-07	-0.0252874	Intron (ENSMUST00000238407.1/384605, intron 1 of 9)	7	35238791	35275533	36743	2	384605	5362	ENSMUSG00000118454	Wdr88	WD repeat domain 88
chr7_113333981_113334481	chr7	113333981	113334481	501	*	-1.29768	5.12947e-07	-0.0402299	Intron (ENSMUST00000117577.7/68815, intron 2 of 7)	7	113315626	113369392	53767	2	68815	34911	ENSMUSG00000038187	Btbd10	BTB (POZ) domain containing 10
chr9_44733599_44734099	chr9	44733599	44734099	501	*	-1.90689	5.12947e-07	-0.0252874	Promoter (1-2kb)	9	44686304	44735198	48895	2	102693	1099	ENSMUSG00000048537	Phldb1	pleckstrin homology like domain, family B, member 1
chr10_23430149_23430649	chr10	23430149	23430649	501	*	-1.83007	5.82986e-07	-0.0264368	Distal Intergenic	10	23102963	23350786	247824	2	14051	-79363	ENSMUSG00000010461	Eya4	EYA transcriptional coactivator and phosphatase 4
chr10_26995518_26996018	chr10	26995518	26996018	501	*	-1.83007	5.82986e-07	-0.0264368	Intron (ENSMUST00000092639.11/16773, intron 58 of 64)	10	26753421	26918648	165228	1	73910	242097	ENSMUSG00000039031	Arhgap18	Rho GTPase activating protein 18
chr12_113187520_113188020	chr12	113187520	113188020	501	*	-1.03395	5.82986e-07	-0.0505747	Promoter (1-2kb)	12	113185930	113189523	3594	1	69195	1590	ENSMUSG00000049036	Tmem121	transmembrane protein 121
chr18_73622334_73622834	chr18	73622334	73622834	501	*	-1.83007	5.82986e-07	-0.0264368	Distal Intergenic	18	73573044	73592575	19532	1	240396	49290	ENSMUSG00000037253	Mex3c	mex3 RNA binding family member C
chr2_153493177_153493677	chr2	153493177	153493677	501	*	-1.83007	5.82986e-07	-0.0264368	3' UTR	2	153407462	153529971	122510	2	329540	36294	ENSMUSG00000061411	Nol4l	nucleolar protein 4-like
chr4_103890980_103891480	chr4	103890980	103891480	501	*	-1.66297	5.82986e-07	-0.0298851	Intron (ENSMUST00000143294.7/13131, intron 1 of 3)	4	103619359	104744844	1125486	1	13131	271621	ENSMUSG00000028519	Dab1	disabled 1
chr1_128592394_128592894	chr1	128592394	128592894	501	*	-2.5025	5.91852e-07	-0.016092	Promoter (<=1kb)	1	128588199	128592293	4095	2	12767	-101	ENSMUSG00000045382	Cxcr4	chemokine (C-X-C motif) receptor 4
chr10_30718879_30719379	chr10	30718879	30719379	501	*	-1.71049	5.91852e-07	-0.0287356	Intron (ENSMUST00000215740.1/211329, intron 2 of 14)	10	30628999	30803326	174328	2	211329	83947	ENSMUSG00000039697	Ncoa7	nuclear receptor coactivator 7
chr12_10612954_10613454	chr12	10612954	10613454	501	*	-2.5025	5.91852e-07	-0.016092	Distal Intergenic	12	10446388	10531303	84916	1	328061	166566	ENSMUSG00000112792	Gm38407	predicted gene, 38407
chr12_108193512_108194012	chr12	108193512	108194012	501	*	2.5025	5.91852e-07	0.016092	Exon (ENSMUST00000221167.1/12454, exon 6 of 12)	12	108179579	108203359	23781	1	12454	13933	ENSMUSG00000021258	Ccnk	cyclin K
chr14_5879126_5879626	chr14	5879126	5879626	501	*	-1.71049	5.91852e-07	-0.0287356	Intron (ENSMUST00000164484.7/ENSMUST00000164484.7, intron 1 of 6)	14	5438065	5807982	369918	2	100041515	-71144	ENSMUSG00000096629	Gm3383	predicted gene 3383
chr15_12795329_12795829	chr15	12795329	12795829	501	*	-1.71049	5.91852e-07	-0.0287356	Distal Intergenic	15	12808177	12824649	16473	2	77877	28820	ENSMUSG00000022195	6030458C11Rik	RIKEN cDNA 6030458C11 gene
chr19_6470438_6470938	chr19	6470438	6470938	501	*	-2.5025	5.91852e-07	-0.016092	Intron (ENSMUST00000113462.7/18190, intron 7 of 22)	19	6418731	6544169	125439	1	18190	51707	ENSMUSG00000033768	Nrxn2	neurexin II
chr2_84386756_84387256	chr2	84386756	84387256	501	*	2.5025	5.91852e-07	0.016092	Intron (ENSMUST00000074262.8/54598, intron 2 of 15)	2	84330626	84425411	94786	2	54598	38155	ENSMUSG00000059588	Calcrl	calcitonin receptor-like
chr3_14862506_14863006	chr3	14862506	14863006	501	*	-1.71049	5.91852e-07	-0.0287356	Promoter (<=1kb)	3	14863512	14872523	9012	1	12350	-506	ENSMUSG00000027559	Car3	carbonic anhydrase 3
chr4_119131120_119131620	chr4	119131120	119131620	501	*	-2.5025	5.91852e-07	-0.016092	Intron (ENSMUST00000030398.9/20525, intron 2 of 9)	4	119108711	119137983	29273	1	20525	22409	ENSMUSG00000028645	Slc2a1	solute carrier family 2 (facilitated glucose transporter), member 1
chr5_35717999_35718499	chr5	35717999	35718499	501	*	-1.76553	5.91852e-07	-0.0275862	3' UTR	5	35697180	35739987	42808	2	231147	21488	ENSMUSG00000036553	Sh3tc1	SH3 domain and tetratricopeptide repeats 1
chr5_57718866_57719366	chr5	57718866	57719366	501	*	-1.05311	5.91852e-07	-0.0494253	Promoter (<=1kb)	5	57717967	58133230	415264	1	54216	899	ENSMUSG00000029108	Pcdh7	protocadherin 7
chr5_63951355_63951855	chr5	63951355	63951855	501	*	-1.71049	5.91852e-07	-0.0287356	Intron (ENSMUST00000154169.3/100532, intron 1 of 6)	5	63908897	63968897	60001	2	100532	17042	ENSMUSG00000047881	Rell1	RELT-like 1
chr11_69133894_69134394	chr11	69133894	69134394	501	*	-1.46713	6.0564e-07	-0.0344828	3' UTR	11	69125896	69149115	23220	1	23801	7998	ENSMUSG00000020892	Aloxe3	arachidonate lipoxygenase 3
chr17_28022724_28023224	chr17	28022724	28023224	501	*	-1.46713	6.0564e-07	-0.0344828	Intron (ENSMUST00000114842.8/224650, intron 12 of 24)	17	28066745	28080639	13895	2	21463	57415	ENSMUSG00000062859	Tcp11	t-complex protein 11
chr1_132527446_132527946	chr1	132527446	132527946	501	*	-2.32193	6.36057e-07	-0.0183908	Exon (ENSMUST00000186487.6/21367, exon 6 of 22)	1	132509427	132543256	33830	2	21367	15310	ENSMUSG00000053024	Cntn2	contactin 2
chr12_16562623_16563123	chr12	16562623	16563123	501	*	-2.32193	6.36057e-07	-0.0183908	Intron (ENSMUST00000067124.5/14245, intron 10 of 20)	12	16535669	16646966	111298	2	14245	83843	ENSMUSG00000020593	Lpin1	lipin 1
chr3_89427472_89427972	chr3	89427472	89427972	501	*	-2.32193	6.36057e-07	-0.0183908	Promoter (2-3kb)	3	89430214	89435128	4915	1	68911	-2242	ENSMUSG00000047824	Pygo2	pygopus 2
chr8_30333151_30333651	chr8	30333151	30333651	501	*	-2.32193	6.36057e-07	-0.0183908	Distal Intergenic	8	30568393	30575573	7181	1	71314	-234742	ENSMUSG00000097044	4933433F19Rik	RIKEN cDNA 4933433F19 gene
chr9_46072022_46072522	chr9	46072022	46072522	501	*	2.32193	6.36057e-07	0.0183908	Intron (ENSMUST00000126865.7/70661, intron 1 of 24)	9	46012820	46224194	211375	1	70661	59202	ENSMUSG00000034135	Sik3	SIK family kinase 3
chr11_117655798_117656298	chr11	117655798	117656298	501	*	-1.12199	6.5319e-07	-0.045977	Promoter (1-2kb)	11	117654289	117763439	109151	1	217351	1509	ENSMUSG00000025571	Tnrc6c	trinucleotide repeat containing 6C
chr12_108277489_108277989	chr12	108277489	108277989	501	*	-1.14975	6.5319e-07	-0.0448276	Promoter (2-3kb)	12	108203602	108275425	71824	2	668158	-2064	ENSMUSG00000084883	Ccdc85c	coiled-coil domain containing 85C
chr11_119084157_119084657	chr11	119084157	119084657	501	*	-1.37851	6.55033e-07	-0.0367816	Promoter (1-2kb)	11	119077573	119086221	8649	2	12418	1564	ENSMUSG00000039989	Cbx4	chromobox 4
chr5_99892031_99892531	chr5	99892031	99892531	501	*	-1.37851	6.55033e-07	-0.0367816	Distal Intergenic	5	99955935	99978938	23004	2	11991	86407	ENSMUSG00000000568	Hnrnpd	heterogeneous nuclear ribonucleoprotein D
chr1_58392255_58392755	chr1	58392255	58392755	501	*	-1.01668	7.04642e-07	-0.0505747	Promoter (<=1kb)	1	58392898	58407353	14456	1	66882	-143	ENSMUSG00000051223	Bzw1	basic leucine zipper and W2 domains 1
chr19_10435845_10436345	chr19	10435845	10436345	501	*	-1.49185	7.46829e-07	-0.0333333	Intron (ENSMUST00000073899.5/54525, intron 4 of 8)	19	10455371	10457473	2103	2	278795	21128	ENSMUSG00000090291	Lrrc10b	leucine rich repeat containing 10B
chr2_72980919_72981419	chr2	72980919	72981419	501	*	-1.26303	7.46829e-07	-0.0402299	Promoter (<=1kb)	2	72936427	72980446	44020	2	20687	-473	ENSMUSG00000027109	Sp3	trans-acting transcription factor 3
chr15_86057393_86057893	chr15	86057393	86057893	501	*	-2.05889	8.27874e-07	-0.0218391	Promoter (<=1kb)	15	86057695	86137634	79940	1	223752	0	ENSMUSG00000035900	Gramd4	GRAM domain containing 4
chr17_5230059_5230559	chr17	5230059	5230559	501	*	-2.05889	8.27874e-07	-0.0218391	Intron (ENSMUST00000092723.10/239985, intron 4 of 18)	17	5417323	5418767	1445	2	106557	188208	ENSMUSG00000101959	Ldhal6b	lactate dehydrogenase A-like 6B
chr14_118137364_118137864	chr14	118137364	118137864	501	*	-1.22239	8.37823e-07	-0.0413793	Promoter (<=1kb)	14	118137158	118163261	26104	1	58245	206	ENSMUSG00000022131	Gpr180	G protein-coupled receptor 180
chr17_34309654_34310154	chr17	34309654	34310154	501	*	-1.22239	8.37823e-07	-0.0413793	3' UTR	17	34305867	34316674	10808	1	14969	3787	ENSMUSG00000060586	H2-Eb1	histocompatibility 2, class II antigen E beta
chr9_57157452_57157952	chr9	57157452	57157952	501	*	-1.22239	8.37823e-07	-0.0413793	Promoter (<=1kb)	9	57155035	57158331	3297	2	66199	379	ENSMUSG00000032299	Commd4	COMM domain containing 4
chr4_150583480_150583980	chr4	150583480	150583980	501	*	-1.32193	8.543e-07	-0.037931	Intron (ENSMUST00000105682.8/68703, intron 12 of 22)	4	150628572	150652174	23603	2	242773	68194	ENSMUSG00000039838	Slc45a1	solute carrier family 45, member 1
chr6_142751327_142751827	chr6	142751327	142751827	501	*	-1.32193	8.543e-07	-0.037931	Distal Intergenic	6	142756686	142775714	19029	1	12764	-4859	ENSMUSG00000030282	Cmas	cytidine monophospho-N-acetylneuraminic acid synthetase
chr11_76996053_76996553	chr11	76996053	76996553	501	*	-2.70044	8.69557e-07	-0.0126437	Promoter (2-3kb)	11	76998603	77032340	33738	1	15567	-2050	ENSMUSG00000020838	Slc6a4	solute carrier family 6 (neurotransmitter transporter, serotonin), member 4
chr11_113184001_113184501	chr11	113184001	113184501	501	*	-2.70044	8.69557e-07	-0.0126437	Intron (ENSMUST00000145206.1/ENSMUST00000145206.1, intron 1 of 1)	11	113043895	113201838	157944	2	72386	17337	ENSMUSG00000087259	2610035D17Rik	RIKEN cDNA 2610035D17 gene
chr11_116586727_116587227	chr11	116586727	116587227	501	*	-1.15433	8.69557e-07	-0.0436782	Promoter (<=1kb)	11	116586432	116597680	11249	1	11298	295	ENSMUSG00000020804	Aanat	arylalkylamine N-acetyltransferase
chr14_20609178_20609678	chr14	20609178	20609678	501	*	-2.70044	8.69557e-07	-0.0126437	Intron (ENSMUST00000035340.13/78787, intron 1 of 20)	14	20548912	20641063	92152	2	78787	31385	ENSMUSG00000034235	Usp54	ubiquitin specific peptidase 54
chr17_33719270_33719770	chr17	33719270	33719770	501	*	-2.70044	8.69557e-07	-0.0126437	Promoter (<=1kb)	17	33685692	33718670	32979	2	224703	-600	ENSMUSG00000079557	Marchf2	membrane associated ring-CH-type finger 2
chr19_4017665_4018165	chr19	4017665	4018165	501	*	-3.70044	8.69557e-07	-0.0137931	Distal Intergenic	19	4007384	4012806	5423	2	17995	-4859	ENSMUSG00000037916	Ndufv1	NADH:ubiquinone oxidoreductase core subunit V1
chr2_35594401_35594901	chr2	35594401	35594901	501	*	-2.70044	8.69557e-07	-0.0126437	Intron (ENSMUST00000112986.8/69601, intron 1 of 16)	2	35549538	35558702	9165	2	100042194	-35699	ENSMUSG00000086555	Gm13446	predicted gene 13446
chr2_59027061_59027561	chr2	59027061	59027561	501	*	-2.70044	8.69557e-07	-0.0126437	Intron (ENSMUST00000226455.1/227933, intron 1 of 14)	2	58821070	59160683	339614	2	227933	133122	ENSMUSG00000036641	Ccdc148	coiled-coil domain containing 148
chr2_131041414_131041914	chr2	131041414	131041914	501	*	-1	8.69557e-07	-0.0505747	Promoter (1-2kb)	2	131040319	131040398	80	2	102465606	-1016	ENSMUSG00000098686	Mir6973b	microRNA 6973b
chr3_30996074_30996574	chr3	30996074	30996574	501	*	-1.51937	8.69557e-07	-0.0321839	Promoter (<=1kb)	3	30995747	31052959	57213	1	18759	327	ENSMUSG00000037643	Prkci	protein kinase C, iota
chr3_65612260_65612760	chr3	65612260	65612760	501	*	-2.70044	8.69557e-07	-0.0126437	Distal Intergenic	3	65659288	65659426	139	1	102465905	-46528	ENSMUSG00000098944	Mir8120	microRNA 8120
chr3_83765792_83766292	chr3	83765792	83766292	501	*	-1.12553	8.69557e-07	-0.0448276	Promoter (<=1kb)	3	83766321	83774316	7996	1	20319	-29	ENSMUSG00000027996	Sfrp2	secreted frizzled-related protein 2
chr3_88226788_88227288	chr3	88226788	88227288	501	*	-2.70044	8.69557e-07	-0.0126437	Intron (ENSMUST00000180635.7/ENSMUST00000180635.7, intron 2 of 4)	3	88215589	88215696	108	2	114482879	-11092	NA	Gm25641	predicted gene, 25641
chr4_127015501_127016001	chr4	127015501	127016001	501	*	-1.09954	8.69557e-07	-0.045977	Distal Intergenic	4	127021324	127049398	28075	1	71514	-5323	ENSMUSG00000028820	Sfpq	splicing factor proline/glutamine rich (polypyrimidine tract binding protein associated)
chr4_150558722_150559222	chr4	150558722	150559222	501	*	-2.70044	8.69557e-07	-0.0126437	Intron (ENSMUST00000105682.8/68703, intron 11 of 22)	4	150628572	150652174	23603	2	242773	92952	ENSMUSG00000039838	Slc45a1	solute carrier family 45, member 1
chr5_25705568_25706068	chr5	25705568	25706068	501	*	-1.12553	8.69557e-07	-0.0448276	Promoter (<=1kb)	5	25689812	25705825	16014	2	57434	0	ENSMUSG00000028933	Xrcc2	X-ray repair complementing defective repair in Chinese hamster cells 2
chr5_130120820_130121320	chr5	130120820	130121320	501	*	-2.70044	8.69557e-07	-0.0126437	Intron (ENSMUST00000118993.7/22021, intron 3 of 5)	5	130144861	130155806	10946	1	212919	-23541	ENSMUSG00000034110	Kctd7	potassium channel tetramerisation domain containing 7
chr5_134511430_134511930	chr5	134511430	134511930	501	*	-2.70044	8.69557e-07	-0.0126437	Intron (ENSMUST00000036999.9/269713, intron 7 of 15)	5	134489383	134552434	63052	2	269713	40504	ENSMUSG00000063146	Clip2	CAP-GLY domain containing linker protein 2
chr7_28763886_28764386	chr7	28763886	28764386	501	*	-2.70044	8.69557e-07	-0.0126437	Promoter (2-3kb)	7	28766735	28788661	21927	1	64383	-2349	ENSMUSG00000015149	Sirt2	sirtuin 2
chr7_29295289_29295789	chr7	29295289	29295789	501	*	-2.70044	8.69557e-07	-0.0126437	Distal Intergenic	7	29289308	29293801	4494	1	68458	5981	ENSMUSG00000037166	Ppp1r14a	protein phosphatase 1, regulatory inhibitor subunit 14A
chr7_64341651_64342151	chr7	64341651	64342151	501	*	-2.70044	8.69557e-07	-0.0126437	Intron (ENSMUST00000173374.1/ENSMUST00000173374.1, intron 1 of 1)	7	64346758	64374095	27338	2	330554	31944	ENSMUSG00000033458	Fan1	FANCD2/FANCI-associated nuclease 1
chr9_45534306_45534806	chr9	45534306	45534806	501	*	-1.51937	8.69557e-07	-0.0321839	Intron (ENSMUST00000217335.1/114873, intron 5 of 5)	9	45416626	45431730	15105	2	74602	-102576	ENSMUSG00000097074	4833428L15Rik	RIKEN cDNA 4833428L15 gene
chr7_100495672_100496172	chr7	100495672	100496172	501	*	-1.27302	9.69243e-07	-0.0390805	Promoter (2-3kb)	7	100493337	100502020	8684	1	22228	2335	ENSMUSG00000033685	Ucp2	uncoupling protein 2 (mitochondrial, proton carrier)
chr4_149585501_149586001	chr4	149585501	149586001	501	*	-1.5502	1.05778e-06	-0.0310345	Promoter (<=1kb)	4	149586468	149648899	62432	1	65945	-467	ENSMUSG00000039953	Clstn1	calsyntenin 1
chr13_54302595_54303095	chr13	54302595	54303095	501	*	-1.03562	1.06149e-06	-0.0482759	Promoter (<=1kb)	13	54301959	54383917	81959	1	12890	636	ENSMUSG00000025867	Cplx2	complexin 2
chr12_24097154_24097654	chr12	24097154	24097654	501	*	-1.41504	1.07968e-06	-0.0344828	Promoter (<=1kb)	12	24043202	24097246	54045	2	66808	0	ENSMUSG00000073158	9030624G23Rik	RIKEN cDNA 9030624G23 gene
chr10_127350549_127351049	chr10	127350549	127351049	501	*	-1.3356	1.0916e-06	-0.0367816	Exon (ENSMUST00000059718.5/16326, exon 2 of 2)	10	127348857	127354411	5555	2	16326	3362	ENSMUSG00000047492	Inhbe	inhibin beta-E
chr2_30721921_30722421	chr2	30721921	30722421	501	*	-1.05585	1.13369e-06	-0.0471264	Promoter (<=1kb)	2	30721210	30721293	84	1	100526499	711	ENSMUSG00000093091	Mir3089	microRNA 3089
chr12_47767453_47767953	chr12	47767453	47767953	501	*	-1.94753	1.13962e-06	-0.0229885	Distal Intergenic	12	46694517	46818929	124413	2	664883	-948524	ENSMUSG00000021047	Nova1	NOVA alternative splicing regulator 1
chr17_67046875_67047375	chr17	67046875	67047375	501	*	-1.94753	1.13962e-06	-0.0229885	Intron (ENSMUST00000037974.9/19274, intron 5 of 32)	17	67026147	67026235	89	2	100885844	-20640	ENSMUSG00000093508	Mir5709	microRNA 5709
chr7_73377289_73377789	chr7	73377289	73377789	501	*	-1.94753	1.13962e-06	-0.0229885	Promoter (1-2kb)	7	73314003	73375774	61772	2	319783	-1515	ENSMUSG00000097756	A730056A06Rik	RIKEN cDNA A730056A06 gene
chr2_33543898_33544398	chr2	33543898	33544398	501	*	-1.19265	1.18325e-06	-0.0413793	Distal Intergenic	2	33450287	33468559	18273	2	71834	-75339	ENSMUSG00000026788	Zbtb43	zinc finger and BTB domain containing 43
chr5_104110176_104110676	chr5	104110176	104110676	501	*	-1.19265	1.18325e-06	-0.0413793	Exon (ENSMUST00000181370.1/ENSMUST00000181370.1, exon 2 of 3)	5	104079111	104113733	34623	2	13602	3057	ENSMUSG00000029309	Sparcl1	SPARC-like 1
chr19_45717831_45718331	chr19	45717831	45718331	501	*	-1.078	1.18463e-06	-0.045977	Distal Intergenic	19	45736798	45742915	6118	2	14179	24584	ENSMUSG00000025219	Fgf8	fibroblast growth factor 8
chr13_23449157_23449657	chr13	23449157	23449657	501	*	-1.58496	1.21401e-06	-0.0298851	Distal Intergenic	13	23456992	23465901	8910	2	12231	16244	ENSMUSG00000000706	Btn1a1	butyrophilin, subfamily 1, member A1
chr13_95325588_95326088	chr13	95325588	95326088	501	*	-1.58496	1.21401e-06	-0.0298851	Promoter (1-2kb)	13	95323612	95337841	14230	1	72114	1976	ENSMUSG00000041995	Zbed3	zinc finger, BED type containing 3
chr14_25610856_25611356	chr14	25610856	25611356	501	*	-1.1592	1.22591e-06	-0.0425287	Intron (ENSMUST00000162645.7/328365, intron 6 of 23)	14	25534439	25534523	85	1	100526533	76417	ENSMUSG00000093081	Mir3075	microRNA 3075
chr14_121739130_121739630	chr14	121739130	121739630	501	*	-1.12928	1.23968e-06	-0.0436782	Intron (ENSMUST00000100299.10/105445, intron 1 of 52)	14	121542046	121797837	255792	2	105445	58207	ENSMUSG00000025558	Dock9	dedicator of cytokinesis 9
chr15_49065845_49066345	chr15	49065845	49066345	501	*	-1.28379	1.30127e-06	-0.037931	Distal Intergenic	15	47580637	48792063	1211427	2	239420	-273782	ENSMUSG00000022311	Csmd3	CUB and Sushi multiple domains 3
chr19_43689942_43690442	chr19	43689942	43690442	501	*	-1.28379	1.30127e-06	-0.037931	Promoter (<=1kb)	19	43689672	43733697	44026	1	93685	270	ENSMUSG00000025192	Entpd7	ectonucleoside triphosphate diphosphohydrolase 7
chr4_132921906_132922406	chr4	132921906	132922406	501	*	-1.28379	1.30127e-06	-0.037931	Promoter (<=1kb)	4	132899213	132922558	23346	2	230789	152	ENSMUSG00000028878	Fam76a	family with sequence similarity 76, member A
chr1_133892822_133893322	chr1	133892822	133893322	501	*	-1.4361	1.33906e-06	-0.0333333	Distal Intergenic	1	133897199	133907999	10801	2	269120	14677	ENSMUSG00000010311	Optc	opticin
chr4_111255408_111255908	chr4	111255408	111255908	501	*	-1.4361	1.33906e-06	-0.0333333	Intron (ENSMUST00000106591.7/78933, intron 5 of 8)	4	111415006	111460298	45293	1	67621	-159098	ENSMUSG00000028545	Bend5	BEN domain containing 5
chr17_30360620_30361120	chr17	30360620	30361120	501	*	-1.62449	1.35629e-06	-0.0287356	Intron (ENSMUST00000168787.7/224671, intron 6 of 10)	17	30395620	30396033	414	2	623169	34913	NA	Gm6402	ribosomal protein S17 pseudogene
chr5_23826263_23826763	chr5	23826263	23826763	501	*	-1.62449	1.35629e-06	-0.0287356	Intron (ENSMUST00000122963.1/ENSMUST00000122963.1, intron 2 of 4)	5	23838944	23844161	5218	2	66169	17398	ENSMUSG00000028998	Tomm7	translocase of outer mitochondrial membrane 7
chr15_67876948_67877448	chr15	67876948	67877448	501	*	-1.85798	1.37733e-06	-0.0241379	Distal Intergenic	15	68083764	68258856	175093	2	380993	381408	ENSMUSG00000022335	Zfat	zinc finger and AT hook domain containing
chr19_12476833_12477333	chr19	12476833	12477333	501	*	-1.85798	1.37733e-06	-0.0241379	Intron (ENSMUST00000045521.8/207521, intron 7 of 8)	19	12460779	12465283	4505	1	17476	16054	ENSMUSG00000046805	Mpeg1	macrophage expressed gene 1
chr6_71927870_71928370	chr6	71927870	71928370	501	*	-1.85798	1.37733e-06	-0.0241379	Intron (ENSMUST00000206556.1/20019, intron 10 of 20)	6	71909053	71984935	75883	1	20019	18817	ENSMUSG00000049553	Polr1a	polymerase (RNA) I polypeptide A
chr5_122048637_122049137	chr5	122048637	122049137	501	*	-1.23879	1.47398e-06	-0.0390805	Promoter (<=1kb)	5	121856366	122050102	193737	2	13048	965	ENSMUSG00000042589	Cux2	cut-like homeobox 2
chr8_27174434_27174934	chr8	27174434	27174934	501	*	-1.23879	1.47398e-06	-0.0390805	Promoter (<=1kb)	8	27138773	27174646	35874	2	75767	0	ENSMUSG00000031488	Rab11fip1	RAB11 family interacting protein 1 (class I)
chr18_25576728_25577228	chr18	25576728	25577228	501	*	-1.66985	1.47828e-06	-0.0275862	Intron (ENSMUST00000115816.2/108013, intron 2 of 12)	18	25477632	25754157	276526	2	108013	176929	ENSMUSG00000024268	Celf4	CUGBP, Elav-like family member 4
chr8_121310926_121311426	chr8	121310926	121311426	501	*	-1.66985	1.47828e-06	-0.0275862	Intron (ENSMUST00000127664.1/108148, intron 1 of 15)	8	121127940	121130644	2705	1	14241	182986	ENSMUSG00000097084	Foxl1	forkhead box L1
chr11_116988106_116988606	chr11	116988106	116988606	501	*	-2.1375	1.51153e-06	-0.0195402	Distal Intergenic	11	116918863	116986948	68086	1	268510	69243	ENSMUSG00000043857	Mgat5b	mannoside acetylglucosaminyltransferase 5, isoenzyme B
chr14_24781622_24782122	chr14	24781622	24782122	501	*	-1.72247	1.51153e-06	-0.0264368	Intron (ENSMUST00000225654.1/ENSMUST00000225654.1, intron 4 of 5)	14	24487125	24496959	9835	1	20088	294497	ENSMUSG00000025290	Rps24	ribosomal protein S24
chr14_103488623_103489123	chr14	103488623	103489123	501	*	-2.1375	1.51153e-06	-0.0195402	Intron (ENSMUST00000227693.1/ENSMUST00000227693.1, intron 1 of 2)	14	103513342	103612797	99456	1	64929	-24219	ENSMUSG00000022123	Scel	sciellin
chr15_37671490_37671990	chr15	37671490	37671990	501	*	-2.1375	1.51153e-06	-0.0195402	Intron (ENSMUST00000168992.7/52589, intron 1 of 6)	15	37366175	37792570	426396	2	52589	120580	ENSMUSG00000051359	Ncald	neurocalcin delta
chr15_89157904_89158404	chr15	89157904	89158404	501	*	-2.1375	1.51153e-06	-0.0195402	Exon (ENSMUST00000060808.9/140570, exon 29 of 36)	15	89162848	89162908	61	2	102465672	4504	ENSMUSG00000106328	Mir7118	microRNA 7118
chr19_30843254_30843754	chr19	30843254	30843754	501	*	-1.72247	1.51153e-06	-0.0264368	Intron (ENSMUST00000065067.13/19091, intron 5 of 17)	19	31082837	31087069	4233	1	83410	-239083	ENSMUSG00000053536	Cstf2t	cleavage stimulation factor, 3' pre-RNA subunit 2, tau
chr2_36203379_36203879	chr2	36203379	36203879	501	*	-1.72247	1.51153e-06	-0.0264368	Intron (ENSMUST00000123224.1/ENSMUST00000123224.1, intron 1 of 1)	2	36230426	36252272	21847	1	19224	-26547	ENSMUSG00000047250	Ptgs1	prostaglandin-endoperoxide synthase 1
chr6_83758220_83758720	chr6	83758220	83758720	501	*	-2.1375	1.51153e-06	-0.0195402	3' UTR	6	83762644	83768326	5683	1	75305	-3924	ENSMUSG00000014747	Ankrd53	ankyrin repeat domain 53
chr8_118343202_118343702	chr8	118343202	118343702	501	*	-2.1375	1.51153e-06	-0.0195402	Intron (ENSMUST00000117160.1/12554, intron 1 of 13)	8	118283733	119324921	1041189	1	12554	59469	ENSMUSG00000031841	Cdh13	cadherin 13
chr4_120666174_120666674	chr4	120666174	120666674	501	*	-1.19931	1.55611e-06	-0.0402299	Promoter (<=1kb)	4	120666572	120667820	1249	1	56222	0	ENSMUSG00000070803	Cited4	Cbp/p300-interacting transactivator, with Glu/Asp-rich carboxy-terminal domain, 4
chr4_134019940_134020440	chr4	134019940	134020440	501	*	-1.19931	1.55611e-06	-0.0402299	Promoter (1-2kb)	4	134003330	134018841	15512	2	83557	-1099	ENSMUSG00000050966	Lin28a	lin-28 homolog A (C. elegans)
chr10_39370130_39370630	chr10	39370130	39370630	501	*	-1.08017	1.59533e-06	-0.0448276	Promoter (1-2kb)	10	39368855	39565381	196527	1	14360	1275	ENSMUSG00000019843	Fyn	Fyn proto-oncogene
chr4_132074434_132074934	chr4	132074434	132074934	501	*	-1.08017	1.59533e-06	-0.0448276	Promoter (<=1kb)	4	131923413	132075321	151909	2	269587	387	ENSMUSG00000028906	Epb41	erythrocyte membrane protein band 4.1
chr18_74084680_74085180	chr18	74084680	74085180	501	*	-1.45943	1.63319e-06	-0.0321839	Distal Intergenic	18	73928486	74065359	136874	2	225724	-19321	ENSMUSG00000024558	Mapk4	mitogen-activated protein kinase 4
chr2_151009163_151009663	chr2	151009163	151009663	501	*	-1.16439	1.63594e-06	-0.0413793	5' UTR	2	150934519	151039382	104864	2	78177	29719	ENSMUSG00000068115	Ninl	ninein-like
chr12_22906211_22906711	chr12	22906211	22906711	501	*	-1.29546	1.68246e-06	-0.0367816	Distal Intergenic	12	22953995	23010284	56290	2	69732	103573	ENSMUSG00000073164	2410018L13Rik	RIKEN cDNA 2410018L13 gene
chr4_137676073_137676573	chr4	137676073	137676573	501	*	-1.29546	1.68246e-06	-0.0367816	Intron (ENSMUST00000139831.7/110351, intron 1 of 8)	4	137664726	137729861	65136	1	110351	11347	ENSMUSG00000041351	Rap1gap	Rap1 GTPase-activating protein
chr7_81673322_81673822	chr7	81673322	81673822	501	*	-1.29546	1.68246e-06	-0.0367816	Intron (ENSMUST00000098326.2/26557, intron 1 of 8)	7	81600481	81707527	107047	2	26557	33705	ENSMUSG00000025813	Homer2	homer scaffolding protein 2
chr10_85387969_85388469	chr10	85387969	85388469	501	*	-1.01792	1.86907e-06	-0.0471264	Promoter (1-2kb)	10	85386814	85660292	273479	1	74007	1155	ENSMUSG00000020042	Btbd11	BTB (POZ) domain containing 11
chr10_92629608_92630108	chr10	92629608	92630108	501	*	1.24793	1.96737e-06	0.037931	Distal Intergenic	10	92684746	92722420	37675	2	17997	92312	ENSMUSG00000019988	Nedd1	neural precursor cell expressed, developmentally down-regulated gene 1
chr2_118761724_118762224	chr2	118761724	118762224	501	*	-1.24793	1.96737e-06	-0.037931	Promoter (<=1kb)	2	118754158	118762661	8504	2	214239	437	ENSMUSG00000045838	Ccdc9b	coiled-coil domain containing 9B
chr10_90753063_90753563	chr10	90753063	90753563	501	*	-1.48543	2.03421e-06	-0.0310345	Intron (ENSMUST00000183156.7/77531, intron 17 of 25)	10	90989311	91082770	93460	2	11783	329207	ENSMUSG00000019979	Apaf1	apoptotic peptidase activating factor 1
chr11_52764405_52764905	chr11	52764405	52764905	501	*	-1.03747	2.03421e-06	-0.045977	Promoter (<=1kb)	11	52764634	53188538	423905	1	320027	0	ENSMUSG00000036264	Fstl4	follistatin-like 4
chr18_65253931_65254431	chr18	65253931	65254431	501	*	-1.48543	2.03421e-06	-0.0310345	Distal Intergenic	18	65248861	65248926	66	1	387231	5070	ENSMUSG00000065402	Mir122	microRNA 122
chr9_52298240_52298740	chr9	52298240	52298740	501	*	-1.48543	2.03421e-06	-0.0310345	Distal Intergenic	9	52111344	52168572	57229	2	244871	-129668	ENSMUSG00000035164	Zc3h12c	zinc finger CCCH type containing 12C
chr15_83056606_83057106	chr15	83056606	83057106	501	*	-1.05889	2.17685e-06	-0.0448276	Distal Intergenic	15	82992973	83033306	40334	2	74039	-23300	ENSMUSG00000058099	Nfam1	Nfat activating molecule with ITAM motif 1
chr2_31822749_31823249	chr2	31822749	31823249	501	*	-1.20645	2.1772e-06	-0.0390805	Intron (ENSMUST00000028188.7/98970, intron 4 of 6)	2	31806166	31810580	4415	2	227717	-12169	ENSMUSG00000043102	Qrfp	pyroglutamylated RFamide peptide
chr3_116340959_116341459	chr3	116340959	116341459	501	*	-1.30812	2.30381e-06	-0.0356322	Intron (ENSMUST00000106491.6/229776, intron 5 of 13)	3	116272553	116428745	156193	2	229776	87286	ENSMUSG00000033502	Cdc14a	CDC14 cell division cycle 14A
chr19_50292706_50293206	chr19	50292706	50293206	501	*	-1.38466	2.38563e-06	-0.0333333	Intron (ENSMUST00000209413.1/58178, intron 5 of 25)	19	50143299	50678646	535348	2	58178	385440	ENSMUSG00000043531	Sorcs1	sortilin-related VPS10 domain containing receptor 1
chr2_26352557_26353057	chr2	26352557	26353057	501	*	-1.1375	2.38563e-06	-0.0413793	Promoter (<=1kb)	2	26348121	26352110	3990	2	52838	-447	ENSMUSG00000075467	Dnlz	DNL-type zinc finger
chr14_5880132_5880632	chr14	5880132	5880632	501	*	-1.51457	2.51301e-06	-0.0298851	5' UTR	14	5438065	5807982	369918	2	100041515	-72150	ENSMUSG00000096629	Gm3383	predicted gene 3383
chr6_49208871_49209371	chr6	49208871	49209371	501	*	-1.51457	2.51301e-06	-0.0298851	Intron (ENSMUST00000031838.8/140488, intron 2 of 14)	6	49085223	49214957	129735	2	140488	5586	ENSMUSG00000029814	Igf2bp3	insulin-like growth factor 2 mRNA binding protein 3
chr17_35233377_35233877	chr17	35233377	35233877	501	*	-2.24793	2.53359e-06	-0.0172414	Promoter (<=1kb)	17	35233660	35238767	5108	1	66237	0	ENSMUSG00000024403	Atp6v1g2	ATPase, H+ transporting, lysosomal V1 subunit G2
chr18_4691781_4692281	chr18	4691781	4692281	501	*	-2.24793	2.53359e-06	-0.0172414	Distal Intergenic	18	4634878	4682869	47992	1	240185	56903	ENSMUSG00000033960	Jcad	junctional cadherin 5 associated
chr2_131094737_131095237	chr2	131094737	131095237	501	*	-2.24793	2.53359e-06	-0.0172414	Distal Intergenic	2	131069220	131086765	17546	2	20612	-7972	ENSMUSG00000027322	Siglec1	sialic acid binding Ig-like lectin 1, sialoadhesin
chr2_146256969_146257469	chr2	146256969	146257469	501	*	-2.24793	2.53359e-06	-0.0172414	Promoter (1-2kb)	2	146259286	146267160	7875	1	77806	-1817	ENSMUSG00000085958	A930019D19Rik	RIKEN cDNA A930019D19 gene
chr5_37106495_37106995	chr5	37106495	37106995	501	*	2.24793	2.53359e-06	0.0172414	Intron (ENSMUST00000043794.10/76071, intron 7 of 12)	5	37085370	37229547	144178	1	381634	21125	ENSMUSG00000117286	Gm1043	predicted gene 1043
chr6_122834327_122834827	chr6	122834327	122834827	501	*	-2.24793	2.53359e-06	-0.0172414	Promoter (2-3kb)	6	122831377	122831437	61	1	102465710	2950	ENSMUSG00000106580	Mir7231	microRNA 7231
chr9_107552365_107552865	chr9	107552365	107552865	501	*	-2.24793	2.53359e-06	-0.0172414	Promoter (<=1kb)	9	107551555	107562267	10713	1	56289	810	ENSMUSG00000010067	Rassf1	Ras association (RalGDS/AF-6) domain family member 1
chr16_5595426_5595926	chr16	5595426	5595926	501	*	-2	2.60085e-06	-0.0206897	Distal Intergenic	16	5885355	7411526	1526172	1	268859	-289429	ENSMUSG00000008658	Rbfox1	RNA binding protein, fox-1 homolog (C. elegans) 1
chr4_134683025_134683525	chr4	134683025	134683525	501	*	-2	2.60085e-06	-0.0206897	Intron (ENSMUST00000038628.3/230815, intron 2 of 12)	4	134561690	134704290	142601	2	230815	20765	ENSMUSG00000037306	Man1c1	mannosidase, alpha, class 1C, member 1
chr7_126690099_126690599	chr7	126690099	126690599	501	*	-2	2.60085e-06	-0.0206897	3' UTR	7	126695401	126697058	1658	1	66162	-4802	ENSMUSG00000047721	Bola2	bolA-like 2 (E. coli)
chr5_23386807_23387307	chr5	23386807	23387307	501	*	-1.01838	2.65159e-06	-0.045977	Exon (ENSMUST00000197377.1/ENSMUST00000197377.1, exon 1 of 2)	5	23431810	23434269	2460	2	269630	46962	ENSMUSG00000073147	5031425E22Rik	RIKEN cDNA 5031425E22 gene
chr14_120476691_120477191	chr14	120476691	120477191	501	*	-1.2578	2.67036e-06	-0.0367816	Promoter (1-2kb)	14	120478444	120507194	28751	1	76108	-1253	ENSMUSG00000051615	Rap2a	RAS related protein 2a
chr3_8971588_8972088	chr3	8971588	8972088	501	*	-1.2578	2.67036e-06	-0.0367816	Intron (ENSMUST00000120143.7/21985, intron 1 of 5)	3	8925593	9004723	79131	2	21985	32635	ENSMUSG00000027506	Tpd52	tumor protein D52
chr1_92742193_92742693	chr1	92742193	92742693	501	*	-2.41504	2.70361e-06	-0.0149425	Distal Intergenic	1	92831645	92860779	29135	1	14733	-88952	ENSMUSG00000034220	Gpc1	glypican 1
chr10_90849283_90849783	chr10	90849283	90849783	501	*	-2.41504	2.70361e-06	-0.0149425	Intron (ENSMUST00000183156.7/77531, intron 17 of 25)	10	90989311	91082770	93460	2	11783	232987	ENSMUSG00000019979	Apaf1	apoptotic peptidase activating factor 1
chr10_128207526_128208026	chr10	128207526	128208026	501	*	-2.41504	2.70361e-06	-0.0149425	3' UTR	10	128209908	128211807	1900	2	66701	3781	ENSMUSG00000051346	Spryd4	SPRY domain containing 4
chr11_97314075_97314575	chr11	97314075	97314575	501	*	-2.41504	2.70361e-06	-0.0149425	Promoter (1-2kb)	11	97315716	97329920	14205	1	67036	-1141	ENSMUSG00000018882	Mrpl45	mitochondrial ribosomal protein L45
chr13_42608920_42609420	chr13	42608920	42609420	501	*	-2.41504	2.70361e-06	-0.0149425	Distal Intergenic	13	42680623	43138526	457904	1	218194	-71203	ENSMUSG00000054728	Phactr1	phosphatase and actin regulator 1
chr14_57885107_57885607	chr14	57885107	57885607	501	*	-2.41504	2.70361e-06	-0.0149425	Intron (ENSMUST00000089473.4/75965, intron 1 of 12)	14	57832703	57890276	57574	2	75965	4669	ENSMUSG00000021969	Zdhhc20	zinc finger, DHHC domain containing 20
chr15_59401703_59402203	chr15	59401703	59402203	501	*	-2.41504	2.70361e-06	-0.0149425	Intron (ENSMUST00000168722.2/68501, intron 2 of 4)	15	59374247	59601684	227438	1	68501	27456	ENSMUSG00000059586	Nsmce2	NSE2/MMS21 homolog, SMC5-SMC6 complex SUMO ligase
chr16_66797965_66798465	chr16	66797965	66798465	501	*	-2.41504	2.70361e-06	-0.0149425	Intron (ENSMUST00000114292.7/239857, intron 5 of 9)	16	66657118	66664626	7509	1	75501	140847	ENSMUSG00000092599	1700010K23Rik	RIKEN cDNA 1700010K23 gene
chr2_120743262_120743762	chr2	120743262	120743762	501	*	-2.41504	2.70361e-06	-0.0149425	Intron (ENSMUST00000148285.7/68968, intron 14 of 40)	2	120716154	120850128	133975	2	68968	106366	ENSMUSG00000027284	Cdan1	congenital dyserythropoietic anemia, type I (human)
chr6_36880527_36881027	chr6	36880527	36881027	501	*	-2.41504	2.70361e-06	-0.0149425	Intron (ENSMUST00000101532.9/320127, intron 29 of 33)	6	36714929	36810220	95292	2	19242	-70307	ENSMUSG00000029838	Ptn	pleiotrophin
chr7_141401208_141401708	chr7	141401208	141401708	501	*	-2.41504	2.70361e-06	-0.0149425	Exon (ENSMUST00000211654.1/21351, exon 6 of 9)	7	141392199	141402968	10770	1	21351	9009	ENSMUSG00000025503	Taldo1	transaldolase 1
chr16_96468611_96469111	chr16	96468611	96469111	501	*	-1.54749	2.91167e-06	-0.0287356	Promoter (1-2kb)	16	96467606	96525793	58188	1	18546	1005	ENSMUSG00000090223	Pcp4	Purkinje cell protein 4
chr3_89269350_89269850	chr3	89269350	89269850	501	*	-1.54749	2.91167e-06	-0.0287356	Promoter (<=1kb)	3	89268246	89270570	2325	2	19729	720	ENSMUSG00000027953	Slc50a1	solute carrier family 50 (sugar transporter), member 1
chr14_21741771_21742271	chr14	21741771	21742271	501	*	-1.32193	2.94632e-06	-0.0344828	Intron (ENSMUST00000142076.1/ENSMUST00000142076.1, intron 1 of 1)	14	21750531	21798726	48196	1	67630	-8260	ENSMUSG00000021770	Samd8	sterile alpha motif domain containing 8
chr4_119338803_119339303	chr4	119338803	119339303	501	*	-1.40439	2.94632e-06	-0.0321839	Intron (ENSMUST00000238759.1/73332, intron 10 of 14)	4	119300010	119320546	20537	2	66101	-18257	ENSMUSG00000060288	Ppih	peptidyl prolyl isomerase H
chr5_24588828_24589328	chr5	24588828	24589328	501	*	-1.40439	2.94632e-06	-0.0321839	Promoter (2-3kb)	5	24586741	24594395	7655	1	100910	2087	ENSMUSG00000038181	Chpf2	chondroitin polymerizing factor 2
chr5_37471943_37472443	chr5	37471943	37472443	501	*	-1.40439	2.94632e-06	-0.0321839	Intron (ENSMUST00000094836.5/64293, intron 6 of 11)	5	37338499	37425055	86557	1	68525	133444	ENSMUSG00000050248	Evc2	EvC ciliary complex subunit 2
chr8_35904978_35905478	chr8	35904978	35905478	501	*	-1.32193	2.94632e-06	-0.0344828	Distal Intergenic	8	35864085	35882957	18873	2	330737	-22021	ENSMUSG00000109761	5430403N17Rik	RIKEN cDNA 5430403N17 gene
chr8_126165702_126166202	chr8	126165702	126166202	501	*	-1.32193	2.94632e-06	-0.0344828	Intron (ENSMUST00000238518.1/210027, intron 2 of 7)	8	126138995	126395978	256984	1	210027	26707	ENSMUSG00000057060	Slc35f3	solute carrier family 35, member F3
chr1_42684724_42685224	chr1	42684724	42685224	501	*	-1.17585	3.07253e-06	-0.0390805	Intron (ENSMUST00000181660.7/66297, intron 1 of 3)	1	42590782	42694842	104061	2	66297	9618	ENSMUSG00000060424	Pantr1	POU domain, class 3, transcription factor 3 adjacent noncoding transcript 1
chr1_132843975_132844475	chr1	132843975	132844475	501	*	-1.17585	3.07253e-06	-0.0390805	Distal Intergenic	1	132880273	132940005	59733	1	16980	-35798	ENSMUSG00000026443	Lrrn2	leucine rich repeat protein 2, neuronal
chr2_91975489_91975989	chr2	91975489	91975989	501	*	-1.17585	3.07253e-06	-0.0390805	Promoter (<=1kb)	2	91932824	91975864	43041	2	104418	0	ENSMUSG00000040479	Dgkz	diacylglycerol kinase zeta
chr7_135736241_135736741	chr7	135736241	135736741	501	*	-1.17585	3.07253e-06	-0.0390805	Distal Intergenic	7	135689784	135716361	26578	2	17345	-19880	ENSMUSG00000031004	Mki67	antigen identified by monoclonal antibody Ki 67
chr17_21707398_21707898	chr17	21707398	21707898	501	*	-1.14202	3.17427e-06	-0.0402299	Promoter (<=1kb)	17	21707741	21725636	17896	1	240034	0	ENSMUSG00000067928	Zfp760	zinc finger protein 760
chr11_120067771_120068271	chr11	120067771	120068271	501	*	-1.58496	3.32273e-06	-0.0275862	Exon (ENSMUST00000106227.7/12009, exon 18 of 26)	11	120064430	120086827	22398	2	12009	18556	ENSMUSG00000039781	Cep131	centrosomal protein 131
chr12_30890005_30890505	chr12	30890005	30890505	501	*	-1.58496	3.32273e-06	-0.0275862	3' UTR	12	30884322	30893854	9533	1	100294583	5683	ENSMUSG00000054204	Alkal2	ALK and LTK ligand 2
chr14_33214393_33214893	chr14	33214393	33214893	501	*	-1	3.32273e-06	-0.045977	Promoter (<=1kb)	14	33214026	33369934	155909	1	239027	367	ENSMUSG00000063506	Arhgap22	Rho GTPase activating protein 22
chr19_42361612_42362112	chr19	42361612	42362112	501	*	-1.58496	3.32273e-06	-0.0275862	Intron (ENSMUST00000238290.1/72832, intron 2 of 14)	19	42268287	42431785	163499	2	72832	69673	ENSMUSG00000042401	Crtac1	cartilage acidic protein 1
chr2_74725989_74726489	chr2	74725989	74726489	501	*	-1.58496	3.32273e-06	-0.0275862	Promoter (<=1kb)	2	74726070	74726137	68	1	387144	0	ENSMUSG00000065500	Mir10b	microRNA 10b
chr6_147243655_147244155	chr6	147243655	147244155	501	*	-1.58496	3.32273e-06	-0.0275862	Promoter (<=1kb)	6	147242527	147243801	1275	2	102639797	0	NA	Gm15767	predicted gene 15767
chr7_29982774_29983274	chr7	29982774	29983274	501	*	-1.58496	3.32273e-06	-0.0275862	Promoter (<=1kb)	7	29983955	30028282	44328	1	243905	-681	ENSMUSG00000074221	Zfp568	zinc finger protein 568
chr1_180185882_180186382	chr1	180185882	180186382	501	*	-1.89308	3.38221e-06	-0.0218391	5' UTR	1	180165238	180199602	34365	2	67426	13220	ENSMUSG00000026489	Coq8a	coenzyme Q8A
chr15_99000440_99000940	chr15	99000440	99000940	501	*	-1.89308	3.38221e-06	-0.0218391	Distal Intergenic	15	98983627	98996446	12820	1	75951	16813	ENSMUSG00000097587	4930578M01Rik	RIKEN cDNA 4930578M01 gene
chr2_145675081_145675581	chr2	145675081	145675581	501	*	-1.89308	3.38221e-06	-0.0218391	Promoter (<=1kb)	2	145675215	145787327	112113	1	408057	0	ENSMUSG00000001768	BC039771	cDNA sequence BC039771
chr19_47177963_47178463	chr19	47177963	47178463	501	*	-1.26849	3.49928e-06	-0.0356322	Promoter (<=1kb)	19	47178820	47259441	80622	1	18011	-357	ENSMUSG00000006435	Neurl1a	neuralized E3 ubiquitin protein ligase 1A
chr2_104207938_104208438	chr2	104207938	104208438	501	*	-1.01886	3.63609e-06	-0.0448276	Exon (ENSMUST00000089726.9/241589, exon 13 of 21)	2	104122769	104124749	1981	1	68243	85169	ENSMUSG00000032671	A930018P22Rik	RIKEN cDNA A930018P22 gene
chrX_159371979_159372479	chrX	159371979	159372479	501	*	-1.01886	3.63609e-06	-0.0448276	Promoter (<=1kb)	20	159372178	159389928	17751	1	66235	0	ENSMUSG00000067194	Eif1ax	eukaryotic translation initiation factor 1A, X-linked
chr2_24934354_24934854	chr2	24934354	24934854	501	*	-1.42626	3.73078e-06	-0.0310345	Promoter (<=1kb)	2	24925352	24935252	9901	2	215705	398	ENSMUSG00000026972	Arrdc1	arrestin domain containing 1
chr5_67947202_67947702	chr5	67947202	67947702	501	*	-1.42626	3.73078e-06	-0.0310345	Intron (ENSMUST00000177891.1/330097, intron 2 of 3)	5	67933610	67943083	9474	2	73865	-4119	ENSMUSG00000106880	4930425K10Rik	RIKEN cDNA 4930425K10 gene
chr9_96712013_96712513	chr9	96712013	96712513	501	*	-1.62803	3.74488e-06	-0.0264368	Intron (ENSMUST00000152594.7/245007, intron 5 of 5)	9	96729851	96752727	22877	2	319859	40214	NA	E030011O05Rik	RIKEN cDNA E030011O05 gene
chr3_50927509_50928009	chr3	50927509	50928009	501	*	-1.33703	3.87721e-06	-0.0333333	Distal Intergenic	3	51224447	51251644	27198	1	12457	-296438	ENSMUSG00000023087	Noct	nocturnin
chr3_103654044_103654544	chr3	103654044	103654544	501	*	-1.33703	3.87721e-06	-0.0333333	Distal Intergenic	3	103575231	103645569	70339	1	54524	78813	ENSMUSG00000027849	Syt6	synaptotagmin VI
chr8_85555726_85556226	chr8	85555726	85556226	501	*	-1.33703	3.87721e-06	-0.0333333	Promoter (<=1kb)	8	85537633	85555344	17712	2	56445	-382	ENSMUSG00000031701	Dnaja2	DnaJ heat shock protein family (Hsp40) member A2
chr11_23574504_23575004	chr11	23574504	23575004	501	*	-1.80735	3.90041e-06	-0.0229885	3' UTR	11	23558058	23558842	785	2	100134990	-15662	ENSMUSG00000085415	Selenok-ps1	selenoprotein K, pseudogene 1
chr11_95648810_95649310	chr11	95648810	95649310	501	*	-1.80735	3.90041e-06	-0.0229885	Distal Intergenic	11	95666957	95680773	13817	1	18673	-17647	ENSMUSG00000038845	Phb	prohibitin
chr11_105588731_105589231	chr11	105588731	105589231	501	*	-1.80735	3.90041e-06	-0.0229885	Promoter (<=1kb)	11	105589986	105929304	339319	1	77097	-755	ENSMUSG00000053580	Tanc2	tetratricopeptide repeat, ankyrin repeat and coiled-coil containing 2
chr11_117077077_117077577	chr11	117077077	117077577	501	*	-1.80735	3.90041e-06	-0.0229885	Promoter (<=1kb)	11	117076802	117078954	2153	1	102465258	275	ENSMUSG00000104740	Mir6516	microRNA 6516
chr14_12077115_12077615	chr14	12077115	12077615	501	*	-1.80735	3.90041e-06	-0.0229885	Intron (ENSMUST00000022264.12/19270, intron 5 of 29)	14	12283976	12324454	40479	1	218734	-206361	ENSMUSG00000033111	3830406C13Rik	RIKEN cDNA 3830406C13 gene
chr5_115475719_115476219	chr5	115475719	115476219	501	*	-1.22239	3.90041e-06	-0.0367816	Downstream (1-2kb)	5	115478010	115484725	6716	2	75387	8506	ENSMUSG00000029524	Sirt4	sirtuin 4
chrX_85122231_85122731	chrX	85122231	85122731	501	*	-1.80735	3.90041e-06	-0.0229885	Intron (ENSMUST00000114000.7/13405, intron 67 of 78)	20	85249679	85270288	20610	1	71996	-126948	ENSMUSG00000035491	Fthl17a	ferritin, heavy polypeptide-like 17, member A
chr10_81245123_81245623	chr10	81245123	81245623	501	*	-1.67807	3.98126e-06	-0.0252874	Exon (ENSMUST00000117798.7/103406, exon 9 of 18)	10	81252935	81263365	10431	1	17179	-7312	ENSMUSG00000004933	Matk	megakaryocyte-associated tyrosine kinase
chr15_85880238_85880738	chr15	85880238	85880738	501	*	-1.67807	3.98126e-06	-0.0252874	Promoter (<=1kb)	15	85879312	85897394	18083	1	72026	926	ENSMUSG00000022386	Trmu	tRNA 5-methylaminomethyl-2-thiouridylate methyltransferase
chr19_42673010_42673510	chr19	42673010	42673510	501	*	-1.67807	3.98126e-06	-0.0252874	Distal Intergenic	19	42593982	42612813	18832	2	67573	-60197	ENSMUSG00000025185	Loxl4	lysyl oxidase-like 4
chr3_153974045_153974545	chr3	153974045	153974545	501	*	-1.67807	3.98126e-06	-0.0252874	Promoter (<=1kb)	3	153973436	154271722	298287	1	242259	609	ENSMUSG00000028360	Slc44a5	solute carrier family 44, member 5
chr11_46308169_46308669	chr11	46308169	46308669	501	*	-1.73697	4.06047e-06	-0.0241379	Intron (ENSMUST00000165599.8/76884, intron 1 of 30)	11	46193850	46312859	119010	2	76884	4190	ENSMUSG00000020340	Cyfip2	cytoplasmic FMR1 interacting protein 2
chr17_24804036_24804536	chr17	24804036	24804536	501	*	-1.73697	4.06047e-06	-0.0241379	Promoter (<=1kb)	17	24804289	24839788	35500	1	75178	0	ENSMUSG00000024155	Meiob	meiosis specific with OB domains
chr17_46257013_46257513	chr17	46257013	46257513	501	*	1.73697	4.06047e-06	0.0241379	3' UTR	17	46253531	46257315	3785	1	224813	3482	ENSMUSG00000071073	Lrrc73	leucine rich repeat containing 73
chr3_92998640_92999140	chr3	92998640	92999140	501	*	-1.73697	4.06047e-06	-0.0241379	Distal Intergenic	3	92992226	92993426	1201	1	69520	6414	ENSMUSG00000068885	Lce3f	late cornified envelope 3F
chr6_134919494_134919994	chr6	134919494	134919994	501	*	-1.73697	4.06047e-06	-0.0241379	Promoter (<=1kb)	6	134920401	134925513	5113	1	12576	-407	ENSMUSG00000003031	Cdkn1b	cyclin-dependent kinase inhibitor 1B
chr11_102739128_102739628	chr11	102739128	102739628	501	*	-1.06228	4.06546e-06	-0.0425287	Exon (ENSMUST00000124025.1/ENSMUST00000124025.1, exon 4 of 11)	11	102761439	102780262	18824	1	11488	-21811	ENSMUSG00000020926	Adam11	a disintegrin and metallopeptidase domain 11
chr7_139704054_139704554	chr7	139704054	139704554	501	*	-1.1822	4.16402e-06	-0.037931	Distal Intergenic	7	139600951	139683817	82867	2	212124	-20237	ENSMUSG00000049571	Cfap46	cilia and flagella associated protein 46
chr1_111863908_111864408	chr1	111863908	111864408	501	*	-1.08746	4.24604e-06	-0.0413793	Promoter (<=1kb)	1	111858702	111864918	6217	2	319901	510	ENSMUSG00000038702	Dsel	dermatan sulfate epimerase-like
chr1_193036098_193036598	chr1	193036098	193036598	501	*	-1.14684	4.29481e-06	-0.0390805	Promoter (<=1kb)	1	192891233	193035775	144543	2	329324	-323	ENSMUSG00000016200	Syt14	synaptotagmin XIV
chr11_105456454_105456954	chr11	105456454	105456954	501	*	-1.14684	4.29481e-06	-0.0390805	Promoter (<=1kb)	11	105360798	105456735	95938	2	632687	0	ENSMUSG00000078627	Marchf10	membrane associated ring-CH-type finger 10
chr11_117598056_117598556	chr11	117598056	117598556	501	*	-1.14684	4.29481e-06	-0.0390805	Distal Intergenic	11	117611247	117613857	2611	1	78403	-12691	NA	2900041M22Rik	RIKEN cDNA 2900041M22 gene
chr6_30736866_30737366	chr6	30736866	30737366	501	*	-1.14684	4.29481e-06	-0.0390805	Intron (ENSMUST00000115127.7/17294, intron 1 of 3)	6	30741299	30741396	98	1	723930	-3933	ENSMUSG00000065501	Mir335	microRNA 335
chr4_151302108_151302608	chr4	151302108	151302608	501	*	-1.11548	4.30409e-06	-0.0402299	Intron (ENSMUST00000169423.8/100072, intron 5 of 24)	4	151089570	151091449	1880	1	105704528	212538	ENSMUSG00000078491	Gm13090	predicted gene 13090
chr5_146844906_146845406	chr5	146844906	146845406	501	*	-1.11548	4.30409e-06	-0.0402299	Promoter (<=1kb)	5	146845071	146847726	2656	1	68895	0	ENSMUSG00000029641	Rasl11a	RAS-like, family 11, member A
chr11_78497006_78497506	chr11	78497006	78497506	501	*	-1	4.57033e-06	-0.0448276	Promoter (<=1kb)	11	78472330	78497754	25425	2	237868	248	ENSMUSG00000050132	Sarm1	sterile alpha and HEAT/Armadillo motif containing 1
chr11_98031409_98031909	chr11	98031409	98031909	501	*	-1.45066	4.57033e-06	-0.0298851	Distal Intergenic	11	98026710	98030492	3783	1	19921	4699	ENSMUSG00000017404	Rpl19	ribosomal protein L19
chr14_59692118_59692618	chr14	59692118	59692618	501	*	-1.45066	4.57033e-06	-0.0298851	Intron (ENSMUST00000080368.12/50769, intron 32 of 35)	14	59625308	59631660	6353	1	219134	66810	ENSMUSG00000044461	Shisa2	shisa family member 2
chr3_147863273_147863773	chr3	147863273	147863773	501	*	-1.45066	4.57033e-06	-0.0298851	Distal Intergenic	3	146852367	146984009	131643	1	70892	1010906	ENSMUSG00000036745	Ttll7	tubulin tyrosine ligase-like family, member 7
chr3_154269690_154270190	chr3	154269690	154270190	501	*	-1.45066	4.57033e-06	-0.0298851	3' UTR	3	154306294	154330659	24366	2	16875	60469	ENSMUSG00000096225	Lhx8	LIM homeobox protein 8
chr3_101212861_101213361	chr3	101212861	101213361	501	*	-1.28011	4.58781e-06	-0.0344828	Distal Intergenic	3	101275899	101287939	12041	2	12481	74578	ENSMUSG00000027863	Cd2	CD2 antigen
chr2_179824884_179825384	chr2	179824884	179825384	501	*	-1.35364	5.03716e-06	-0.0321839	Intron (ENSMUST00000000314.12/12561, intron 4 of 15)	2	179975993	179979013	3021	1	66730	-150609	ENSMUSG00000085704	4921531C22Rik	RIKEN cDNA 4921531C22 gene
chr15_102224397_102224897	chr15	102224397	102224897	501	*	-1.01937	5.06476e-06	-0.0436782	5' UTR	15	102215995	102231944	15950	2	16421	7047	ENSMUSG00000001281	Itgb7	integrin beta 7
chr15_102737110_102737610	chr15	102737110	102737610	501	*	-1.23133	5.3699e-06	-0.0356322	Distal Intergenic	15	102706777	102722178	15402	2	67488	-14932	ENSMUSG00000023055	Calcoco1	calcium binding and coiled coil domain 1
chr1_88806938_88807438	chr1	88806938	88807438	501	*	-2.07039	5.37329e-06	-0.0183908	Distal Intergenic	1	88754890	88755736	847	1	78650	52048	ENSMUSG00000097398	Platr5	pluripotency associated transcript 5
chr12_113048632_113049132	chr12	113048632	113049132	501	*	2.07039	5.37329e-06	0.0183908	Intron (ENSMUST00000223502.1/217893, intron 4 of 23)	12	113074502	113088917	14416	1	75671	-25370	ENSMUSG00000012211	Tex22	testis expressed gene 22
chr16_88190115_88190615	chr16	88190115	88190615	501	*	-2.07039	5.37329e-06	-0.0183908	Intron (ENSMUST00000228188.1/14805, intron 1 of 16)	16	87895900	88290265	394366	2	14805	99650	ENSMUSG00000022935	Grik1	glutamate receptor, ionotropic, kainate 1
chr17_8388395_8388895	chr17	8388395	8388895	501	*	-2.07039	5.37329e-06	-0.0183908	Intron (ENSMUST00000140890.2/21331, intron 2 of 5)	17	8434423	8442496	8074	1	20997	-45528	ENSMUSG00000062327	T	brachyury, T-box transcription factor T
chr9_48559780_48560280	chr9	48559780	48560280	501	*	-2.07039	5.37329e-06	-0.0183908	Distal Intergenic	9	48591877	48605153	13277	2	18113	44873	ENSMUSG00000032271	Nnmt	nicotinamide N-methyltransferase
chr1_137927824_137928324	chr1	137927824	137928324	501	*	2.58496	5.38774e-06	0.0114943	Exon (ENSMUST00000191963.1/ENSMUST00000191963.1, exon 1 of 1)	1	137966455	137966541	87	1	735252	-38131	ENSMUSG00000065565	Mir181a-1	microRNA 181a-1
chr1_180151102_180151602	chr1	180151102	180151602	501	*	-2.58496	5.38774e-06	-0.0114943	Exon (ENSMUST00000097453.8/226751, exon 32 of 35)	1	180165238	180199602	34365	2	67426	48000	ENSMUSG00000026489	Coq8a	coenzyme Q8A
chr10_96658948_96659448	chr10	96658948	96659448	501	*	-2.58496	5.38774e-06	-0.0114943	Distal Intergenic	10	96617006	96622809	5804	1	12226	41942	ENSMUSG00000036478	Btg1	BTG anti-proliferation factor 1
chr11_32218533_32219033	chr11	32218533	32219033	501	*	-3.58496	5.38774e-06	-0.0126437	Intron (ENSMUST00000020524.14/13650, intron 1 of 17)	11	32209585	32222300	12716	2	13650	3267	ENSMUSG00000020282	Rhbdf1	rhomboid 5 homolog 1
chr11_48827047_48827547	chr11	48827047	48827547	501	*	-2.58496	5.38774e-06	-0.0114943	Promoter (<=1kb)	11	48826140	48852209	26070	1	94089	907	ENSMUSG00000040350	Trim7	tripartite motif-containing 7
chr11_96972379_96972879	chr11	96972379	96972879	501	*	2.58496	5.38774e-06	0.0114943	Intron (ENSMUST00000107624.7/78912, intron 1 of 6)	11	96953341	96982959	29619	2	78912	10080	ENSMUSG00000018678	Sp2	Sp2 transcription factor
chr11_103804006_103804506	chr11	103804006	103804506	501	*	2.58496	5.38774e-06	0.0114943	Intron (ENSMUST00000000127.5/22415, intron 1 of 4)	11	103774150	103817957	43808	1	22415	29856	ENSMUSG00000000125	Wnt3	wingless-type MMTV integration site family, member 3
chr12_54044804_54045304	chr12	54044804	54045304	501	*	-2.58496	5.38774e-06	-0.0114943	Intron (ENSMUST00000223358.1/27386, intron 7 of 10)	12	54178981	54203860	24880	2	112407	158556	ENSMUSG00000035105	Egln3	egl-9 family hypoxia-inducible factor 3
chr12_110782388_110782888	chr12	110782388	110782888	501	*	-2.58496	5.38774e-06	-0.0114943	Intron (ENSMUST00000193053.5/69641, intron 2 of 2)	12	110737944	110804238	66295	1	69641	44444	ENSMUSG00000037957	Wdr20	WD repeat domain 20
chr13_56761817_56762317	chr13	56761817	56762317	501	*	2.58496	5.38774e-06	0.0114943	Distal Intergenic	13	56703010	56742377	39368	1	17129	58807	ENSMUSG00000021540	Smad5	SMAD family member 5
chr14_33369912_33370412	chr14	33369912	33370412	501	*	-1.04064	5.38774e-06	-0.0425287	3' UTR	14	33377898	33447158	69261	2	26419	76746	ENSMUSG00000021936	Mapk8	mitogen-activated protein kinase 8
chr14_47735437_47735937	chr14	47735437	47735937	501	*	2.58496	5.38774e-06	0.0114943	Exon (ENSMUST00000190857.1/16709, exon 2 of 2)	14	47648448	47739894	91447	1	16709	86989	ENSMUSG00000021843	Ktn1	kinectin 1
chr14_57165461_57165961	chr14	57165461	57165961	501	*	2.58496	5.38774e-06	0.0114943	Distal Intergenic	14	57123303	57133611	10309	2	14623	-31850	ENSMUSG00000040055	Gjb6	gap junction protein, beta 6
chr14_60735370_60735870	chr14	60735370	60735870	501	*	-2.58496	5.38774e-06	-0.0114943	Intron (ENSMUST00000160973.7/219140, intron 4 of 12)	14	60768134	60780869	12736	1	239126	-32264	ENSMUSG00000071347	C1qtnf9	C1q and tumor necrosis factor related protein 9
chr14_64639835_64640335	chr14	64639835	64640335	501	*	-3.58496	5.38774e-06	-0.0126437	Distal Intergenic	14	64647265	64809617	162353	1	16554	-6930	ENSMUSG00000060012	Kif13b	kinesin family member 13B
chr15_64695813_64696313	chr15	64695813	64696313	501	*	-2.58496	5.38774e-06	-0.0114943	Downstream (<1kb)	15	64697084	64922296	225213	2	11514	225983	ENSMUSG00000022376	Adcy8	adenylate cyclase 8
chr15_88710899_88711399	chr15	88710899	88711399	501	*	-2.58496	5.38774e-06	-0.0114943	Intron (ENSMUST00000109381.8/223770, intron 6 of 12)	15	88687034	88734233	47200	2	223770	22834	ENSMUSG00000022387	Brd1	bromodomain containing 1
chr16_11033465_11033965	chr16	11033465	11033965	501	*	-2.58496	5.38774e-06	-0.0114943	Intron (ENSMUST00000229764.1/ENSMUST00000229764.1, intron 1 of 2)	16	11060945	11074985	14041	1	20621	-26980	ENSMUSG00000037972	Snn	stannin
chr16_35461995_35462495	chr16	35461995	35462495	501	*	2.58496	5.38774e-06	0.0114943	Intron (ENSMUST00000023550.8/72599, intron 3 of 16)	16	35397312	35490873	93562	2	72599	28378	ENSMUSG00000022844	Pdia5	protein disulfide isomerase associated 5
chr16_91933598_91934098	chr16	91933598	91934098	501	*	2.58496	5.38774e-06	0.0114943	Promoter (1-2kb)	16	91925214	91931687	6474	2	28080	-1911	ENSMUSG00000022956	Atp5o	ATP synthase, H+ transporting, mitochondrial F1 complex, O subunit
chr17_36020568_36021068	chr17	36020568	36021068	501	*	-2.58496	5.38774e-06	-0.0114943	Promoter (<=1kb)	17	36005695	36020560	14866	2	15042	-8	ENSMUSG00000053835	H2-T24	histocompatibility 2, T region locus 24
chr18_69381571_69382071	chr18	69381571	69382071	501	*	-2.58496	5.38774e-06	-0.0114943	Intron (ENSMUST00000203002.3/21413, intron 3 of 6)	18	69343356	69689079	345724	1	21413	38215	ENSMUSG00000053477	Tcf4	transcription factor 4
chr3_97324056_97324556	chr3	97324056	97324556	501	*	2.58496	5.38774e-06	0.0114943	Distal Intergenic	3	97203662	97297917	94256	2	77578	-26139	ENSMUSG00000038256	Bcl9	B cell CLL/lymphoma 9
chr3_125853868_125854368	chr3	125853868	125854368	501	*	-2.58496	5.38774e-06	-0.0114943	Distal Intergenic	3	125865271	125938619	73349	2	22239	84251	ENSMUSG00000032854	Ugt8a	UDP galactosyltransferase 8A
chr4_55052611_55053111	chr4	55052611	55053111	501	*	-2.58496	5.38774e-06	-0.0114943	Intron (ENSMUST00000098070.9/242466, intron 9 of 12)	4	54945048	55083563	138516	1	242466	107563	ENSMUSG00000060206	Zfp462	zinc finger protein 462
chr4_134519705_134520205	chr4	134519705	134520205	501	*	-2.58496	5.38774e-06	-0.0114943	Intron (ENSMUST00000105866.2/69885, intron 1 of 2)	4	134510999	134523927	12929	1	69885	8706	ENSMUSG00000078521	Aunip	aurora kinase A and ninein interacting protein
chr4_148158980_148159480	chr4	148158980	148159480	501	*	-1.04064	5.38774e-06	-0.0425287	Promoter (1-2kb)	4	148152800	148160482	7683	2	230903	1002	ENSMUSG00000029001	Fbxo44	F-box protein 44
chr5_20229837_20230337	chr5	20229837	20230337	501	*	2.58496	5.38774e-06	0.0114943	Intron (ENSMUST00000197354.4/50791, intron 6 of 21)	5	20758663	20882124	123462	2	68770	651787	ENSMUSG00000039987	Phtf2	putative homeodomain transcription factor 2
chr5_147227300_147227800	chr5	147227300	147227800	501	*	-2.58496	5.38774e-06	-0.0114943	Downstream (<1kb)	5	147188696	147190947	2252	1	14842	38604	ENSMUSG00000053129	Gsx1	GS homeobox 1
chr7_35386514_35387014	chr7	35386514	35387014	501	*	-2.58496	5.38774e-06	-0.0114943	Intron (ENSMUST00000032705.12/52428, intron 14 of 14)	7	35392152	35396836	4685	2	101831	9822	ENSMUSG00000030493	Faap24	Fanconi anemia core complex associated protein 24
chr8_79079990_79080490	chr8	79079990	79080490	501	*	2.58496	5.38774e-06	0.0114943	Intron (ENSMUST00000098614.8/622675, intron 4 of 14)	8	79028437	79193766	165330	1	622675	51553	ENSMUSG00000071064	Zfp827	zinc finger protein 827
chr9_123507274_123507774	chr9	123507274	123507774	501	*	-2.58496	5.38774e-06	-0.0114943	Intron (ENSMUST00000026269.3/29806, intron 2 of 7)	9	123529759	123592600	62842	1	83493	-21985	ENSMUSG00000025240	Sacm1l	SAC1 suppressor of actin mutations 1-like (yeast)
chr10_95790688_95791188	chr10	95790688	95791188	501	*	-1.47805	5.39818e-06	-0.0287356	Intron (ENSMUST00000187483.6/ENSMUST00000187483.6, intron 4 of 5)	10	95940650	96045518	104869	1	216238	-149462	ENSMUSG00000036499	Eea1	early endosome antigen 1
chr2_115855756_115856256	chr2	115855756	115856256	501	*	-1.47805	5.39818e-06	-0.0287356	Distal Intergenic	2	116067225	116085911	18687	1	108168785	-210969	ENSMUSG00000086308	G630016G05Rik	RIKEN cDNA G630016G05 gene
chr5_113724405_113724905	chr5	113724405	113724905	501	*	-1.47805	5.39818e-06	-0.0287356	Promoter (<=1kb)	5	113692422	113724772	32351	2	381707	0	ENSMUSG00000042184	1700069L16Rik	RIKEN cDNA 1700069L16 gene
chr12_12942344_12942844	chr12	12942344	12942844	501	*	-1.18903	5.44528e-06	-0.0367816	Promoter (<=1kb)	12	12936093	12941914	5822	2	18109	-430	ENSMUSG00000037169	Mycn	v-myc avian myelocytomatosis viral related oncogene, neuroblastoma derived
chr10_119453961_119454461	chr10	119453961	119454461	501	*	-1.0902	5.68747e-06	-0.0402299	Promoter (<=1kb)	10	119453830	120087261	633432	1	74053	131	ENSMUSG00000034813	Grip1	glutamate receptor interacting protein 1
chr12_86810695_86811195	chr12	86810695	86811195	501	*	-1.152	5.71275e-06	-0.037931	Distal Intergenic	12	86880701	86884798	4098	2	238330	73603	ENSMUSG00000034168	Irf2bpl	interferon regulatory factor 2 binding protein-like
chr7_122672915_122673415	chr7	122672915	122673415	501	*	-1.37197	6.28228e-06	-0.0310345	Promoter (2-3kb)	7	122670492	122769393	98902	1	54376	2423	ENSMUSG00000066189	Cacng3	calcium channel, voltage-dependent, gamma subunit 3
chr17_12416159_12416659	chr17	12416159	12416659	501	*	-1.50901	6.77332e-06	-0.0275862	Intron (ENSMUST00000014578.6/18815, intron 17 of 18)	17	12378608	12419385	40778	1	18815	37551	ENSMUSG00000059481	Plg	plasminogen
chr7_133959130_133959630	chr7	133959130	133959630	501	*	-1.50901	6.77332e-06	-0.0275862	Intron (ENSMUST00000067680.10/11489, intron 11 of 22)	7	133720942	133782726	61785	2	101437	-176404	ENSMUSG00000030986	Dhx32	DEAH (Asp-Glu-Ala-His) box polypeptide 32
chr14_65343086_65343586	chr14	65343086	65343586	501	*	-1.0199	6.92917e-06	-0.0425287	Distal Intergenic	14	65358389	65398930	40542	1	380912	-14803	ENSMUSG00000034522	Zfp395	zinc finger protein 395
chr17_9167113_9167613	chr17	9167113	9167613	501	*	-1.0199	6.92917e-06	-0.0425287	Promoter (<=1kb)	17	9147719	9167836	20118	2	67791	223	ENSMUSG00000097049	6530411M01Rik	RIKEN cDNA 6530411M01 gene
chr4_122955330_122955830	chr4	122955330	122955830	501	*	-1.0199	6.92917e-06	-0.0425287	Intron (ENSMUST00000152308.7/76574, intron 3 of 11)	4	122946850	122961188	14339	2	76574	5358	ENSMUSG00000028655	Mfsd2a	major facilitator superfamily domain containing 2A
chr17_48001816_48002316	chr17	48001816	48002316	501	*	-1.24101	7.03089e-06	-0.0344828	Distal Intergenic	17	48036745	48038293	1549	2	76651	35977	ENSMUSG00000094928	1700122O11Rik	RIKEN cDNA 1700122O11 gene
chr18_61692127_61692627	chr18	61692127	61692627	501	*	-1.24101	7.03089e-06	-0.0344828	3' UTR	18	61684887	61692538	7652	1	56069	7240	ENSMUSG00000024578	Il17b	interleukin 17B
chr8_83573426_83573926	chr8	83573426	83573926	501	*	-1.24101	7.03089e-06	-0.0344828	Exon (ENSMUST00000238997.1/106529, exon 2 of 12)	8	83566671	83571626	4956	1	66916	6755	ENSMUSG00000033938	Ndufb7	NADH:ubiquinone oxidoreductase subunit B7
chr6_83456417_83456917	chr6	83456417	83456917	501	*	-1.04182	7.45962e-06	-0.0413793	Promoter (2-3kb)	6	83362373	83459084	96712	2	194388	2167	ENSMUSG00000034832	Tet3	tet methylcytosine dioxygenase 3
chr11_78751463_78751963	chr11	78751463	78751963	501	*	-1.1964	7.73697e-06	-0.0356322	Promoter (<=1kb)	11	78750506	78751729	1224	2	69109	0	ENSMUSG00000049489	Ccnq	cyclin Q
chr4_45011392_45011892	chr4	45011392	45011892	501	*	-1.1964	7.73697e-06	-0.0356322	Promoter (<=1kb)	4	44991242	45012412	21171	2	230119	520	ENSMUSG00000049657	Zbtb5	zinc finger and BTB domain containing 5
chr8_68062123_68062623	chr8	68062123	68062623	501	*	-1.06609	7.87366e-06	-0.0402299	5' UTR	8	67689082	68206057	516976	2	234353	143434	ENSMUSG00000030465	Psd3	pleckstrin and Sec7 domain containing 3
chr9_121983455_121983955	chr9	121983455	121983955	501	*	-1.06609	7.87366e-06	-0.0402299	5' UTR	9	121981606	121997110	15505	2	215494	13155	ENSMUSG00000066235	Pomgnt2	protein O-linked mannose beta 1,4-N-acetylglucosaminyltransferase 2
chr11_70228832_70229332	chr11	70228832	70229332	501	*	-1.54432	8.02545e-06	-0.0264368	Promoter (<=1kb)	11	70224128	70229798	5671	2	12029	466	ENSMUSG00000000317	Bcl6b	B cell CLL/lymphoma 6, member B
chr12_102384846_102385346	chr12	102384846	102385346	501	*	-1.9386	8.02545e-06	-0.0195402	Intron (ENSMUST00000056950.13/217835, intron 8 of 9)	12	102394084	102439813	45730	2	19141	54467	ENSMUSG00000021190	Lgmn	legumain
chr17_5556377_5556877	chr17	5556377	5556877	501	*	-1.9386	8.02545e-06	-0.0195402	Intron (ENSMUST00000089185.5/224454, intron 1 of 8)	17	5492557	5753811	261255	1	224454	63820	ENSMUSG00000034265	Zdhhc14	zinc finger, DHHC domain containing 14
chr17_75328559_75329059	chr17	75328559	75329059	501	*	-1.54432	8.02545e-06	-0.0264368	Intron (ENSMUST00000234490.1/268977, intron 25 of 34)	17	75435896	75529054	93159	1	240168	-106837	ENSMUSG00000071042	Rasgrp3	RAS, guanyl releasing protein 3
chr8_22932656_22933156	chr8	22932656	22933156	501	*	-1.9386	8.02545e-06	-0.0195402	Exon (ENSMUST00000110696.7/244349, exon 15 of 17)	8	22974844	23150497	175654	1	11733	-41688	ENSMUSG00000031543	Ank1	ankyrin 1, erythroid
chr9_72467454_72467954	chr9	72467454	72467954	501	*	-1.54432	8.02545e-06	-0.0264368	Intron (ENSMUST00000184312.7/21778, intron 9 of 12)	9	72450394	72492212	41819	2	21778	24258	ENSMUSG00000090626	Tex9	testis expressed gene 9
chr14_50061841_50062341	chr14	50061841	50062341	501	*	-1.30666	8.045e-06	-0.0321839	Exon (ENSMUST00000193092.1/ENSMUST00000193092.1, exon 1 of 1)	14	50083714	50084679	966	2	258313	22338	ENSMUSG00000060523	Olfr726	olfactory receptor 726
chr14_64802034_64802534	chr14	64802034	64802534	501	*	-1.15754	8.06028e-06	-0.0367816	Intron (ENSMUST00000100473.4/16554, intron 38 of 39)	14	64811600	64949871	138272	2	219150	147337	ENSMUSG00000021972	Hmbox1	homeobox containing 1
chr15_76465734_76466234	chr15	76465734	76466234	501	*	-1.15754	8.06028e-06	-0.0367816	Intron (ENSMUST00000023217.10/12181, intron 3 of 15)	15	76457520	76459449	1930	1	20289	8214	ENSMUSG00000034161	Scx	scleraxis
chr19_12796528_12797028	chr19	12796528	12797028	501	*	-1.09311	8.06037e-06	-0.0390805	Promoter (<=1kb)	19	12796193	12833807	37615	1	107321	335	ENSMUSG00000024696	Lpxn	leupaxin
chr2_28369680_28370180	chr2	28369680	28370180	501	*	-1.09311	8.06037e-06	-0.0390805	Distal Intergenic	2	28446800	28455508	8709	1	241289	-76620	ENSMUSG00000035829	Ppp1r26	protein phosphatase 1, regulatory subunit 26
chr4_107018990_107019490	chr4	107018990	107019490	501	*	-1.09311	8.06037e-06	-0.0390805	Exon (ENSMUST00000129617.1/ENSMUST00000129617.1, exon 3 of 4)	4	107055874	107066868	10995	2	56280	47378	ENSMUSG00000028622	Mrpl37	mitochondrial ribosomal protein L37
chr2_129873459_129873959	chr2	129873459	129873959	501	*	-1.39232	8.08622e-06	-0.0298851	Distal Intergenic	2	129800517	129832287	31771	1	67333	72942	ENSMUSG00000037885	Stk35	serine/threonine kinase 35
chr2_162947547_162948047	chr2	162947547	162948047	501	*	-1.39232	8.08622e-06	-0.0298851	5' UTR	2	162943472	162974522	31051	1	241764	4075	ENSMUSG00000035576	L3mbtl1	L3MBTL1 histone methyl-lysine binding protein
chr19_42144460_42144960	chr19	42144460	42144960	501	*	-1.58496	9.41026e-06	-0.0252874	Promoter (2-3kb)	19	42147400	42151703	4304	1	277010	-2440	ENSMUSG00000044345	Marveld1	MARVEL (membrane-associating) domain containing 1
chr1_126492532_126493032	chr1	126492532	126493032	501	*	-1.25154	9.50444e-06	-0.0333333	5' UTR	1	125913620	126830799	917180	2	210356	337767	ENSMUSG00000049690	Nckap5	NCK-associated protein 5
chr10_127546594_127547094	chr10	127546594	127547094	501	*	-2.16993	9.50444e-06	-0.016092	3' UTR	10	127525473	127534559	9087	2	104080	-12035	ENSMUSG00000040258	Nxph4	neurexophilin 4
chr13_37825757_37826257	chr13	37825757	37826257	501	*	-2.16993	9.50444e-06	-0.016092	5' UTR	13	37778400	37952005	173606	1	68750	47357	ENSMUSG00000039087	Rreb1	ras responsive element binding protein 1
chr14_50969488_50969988	chr14	50969488	50969988	501	*	2.16993	9.50444e-06	0.016092	Distal Intergenic	14	50955992	50964749	8758	1	667034	13496	ENSMUSG00000068417	Pnp2	purine-nucleoside phosphorylase 2
chr14_120979529_120980029	chr14	120979529	120980029	501	*	-2.16993	9.50444e-06	-0.016092	Distal Intergenic	14	121035200	121283744	248545	1	223254	-55171	ENSMUSG00000025555	Farp1	FERM, RhoGEF (Arhgef) and pleckstrin domain protein 1 (chondrocyte-derived)
chr15_38197567_38198067	chr15	38197567	38198067	501	*	-2.16993	9.50444e-06	-0.016092	Intron (ENSMUST00000227576.1/ENSMUST00000227576.1, intron 1 of 2)	15	38219203	38226735	7533	1	18285	-21136	ENSMUSG00000061923	Odf1	outer dense fiber of sperm tails 1
chr15_48502368_48502868	chr15	48502368	48502868	501	*	-2.16993	9.50444e-06	-0.016092	Intron (ENSMUST00000160658.7/239420, intron 4 of 68)	15	47580637	48792063	1211427	2	239420	289195	ENSMUSG00000022311	Csmd3	CUB and Sushi multiple domains 3
chr17_6167835_6168335	chr17	6167835	6168335	501	*	-2.16993	9.50444e-06	-0.016092	Intron (ENSMUST00000142030.7/68842, intron 1 of 5)	17	6106479	6251128	144650	1	68842	61356	ENSMUSG00000034377	Tulp4	tubby like protein 4
chr17_78604376_78604876	chr17	78604376	78604876	501	*	-2.16993	9.50444e-06	-0.016092	Intron (ENSMUST00000024880.10/74199, intron 9 of 13)	17	78508064	78627408	119345	1	74199	96312	ENSMUSG00000024076	Vit	vitrin
chr17_83889671_83890171	chr17	83889671	83890171	501	*	-2.16993	9.50444e-06	-0.016092	Distal Intergenic	17	83851675	83854418	2744	2	320021	-35253	ENSMUSG00000097254	C430042M11Rik	RIKEN cDNA C430042M11 gene
chr2_75703278_75703778	chr2	75703278	75703778	501	*	-2.16993	9.50444e-06	-0.016092	Promoter (<=1kb)	2	75675513	75704641	29129	2	18024	863	ENSMUSG00000015839	Nfe2l2	nuclear factor, erythroid derived 2, like 2
chr5_73683995_73684495	chr5	73683995	73684495	501	*	-2.16993	9.50444e-06	-0.016092	Distal Intergenic	5	73651379	73679512	28134	1	73472	32616	ENSMUSG00000029155	Spata18	spermatogenesis associated 18
chr5_140623937_140624437	chr5	140623937	140624437	501	*	-2.16993	9.50444e-06	-0.016092	Intron (ENSMUST00000197452.4/78339, intron 12 of 12)	5	140607320	140615545	8226	1	16848	16617	ENSMUSG00000029570	Lfng	LFNG O-fucosylpeptide 3-beta-N-acetylglucosaminyltransferase
chr5_140758405_140758905	chr5	140758405	140758905	501	*	-2.16993	9.50444e-06	-0.016092	3' UTR	5	140724127	140761439	37313	1	231842	34278	ENSMUSG00000050022	Amz1	archaelysin family metallopeptidase 1
chr6_72647268_72647768	chr6	72647268	72647768	501	*	-2.16993	9.50444e-06	-0.016092	Intron (ENSMUST00000069536.11/21415, intron 4 of 11)	6	72629288	72637717	8430	1	100038714	17980	NA	Gm15401	predicted gene 15401
chr6_135144471_135144971	chr6	135144471	135144971	501	*	-1.25154	9.50444e-06	-0.0333333	Intron (ENSMUST00000045855.8/15199, intron 3 of 3)	6	135105991	135118283	12293	2	93746	-26188	ENSMUSG00000030205	Gprc5d	G protein-coupled receptor, family C, group 5, member D
chr14_78732606_78733106	chr14	78732606	78733106	501	*	-1.02046	9.64694e-06	-0.0413793	Promoter (<=1kb)	14	78558750	78732776	174027	2	380921	0	ENSMUSG00000034731	Dgkh	diacylglycerol kinase, eta
chr17_29436787_29437287	chr17	29436787	29437287	501	*	-1.02046	9.64694e-06	-0.0413793	Exon (ENSMUST00000234020.1/ENSMUST00000234020.1, exon 1 of 1)	17	29490753	29496112	5360	1	18712	-53466	ENSMUSG00000024014	Pim1	proviral integration site 1
chr11_20794156_20794656	chr11	20794156	20794656	501	*	1.8365	9.95148e-06	0.0206897	Distal Intergenic	11	20823576	20831056	7481	2	216551	36400	ENSMUSG00000042363	Lgalsl	lectin, galactoside binding-like
chr15_85635268_85635768	chr15	85635268	85635768	501	*	-1.8365	9.95148e-06	-0.0206897	Distal Intergenic	15	85653616	85707524	53909	1	102800312	-17848	NA	Lncppara	long noncoding RNA near Ppara
chr16_97035322_97035822	chr16	97035322	97035822	501	*	-1.8365	9.95148e-06	-0.0206897	Intron (ENSMUST00000056102.8/13508, intron 3 of 32)	16	96590840	97170752	579913	2	13508	134930	ENSMUSG00000050272	Dscam	DS cell adhesion molecule
chr18_84090188_84090688	chr18	84090188	84090688	501	*	1.8365	9.95148e-06	0.0206897	Promoter (2-3kb)	18	84088063	84097528	9466	1	225791	2125	ENSMUSG00000049090	Zadh2	zinc binding alcohol dehydrogenase, domain containing 2
chr4_45054825_45055325	chr4	45054825	45055325	501	*	-1.8365	9.95148e-06	-0.0206897	Intron (ENSMUST00000052236.12/269529, intron 3 of 10)	4	45034247	45084604	50358	2	269529	29279	ENSMUSG00000048232	Fbxo10	F-box protein 10
chr17_9023030_9023530	chr17	9023030	9023530	501	*	-1.63227	1.02482e-05	-0.0241379	Distal Intergenic	17	8988333	9011949	23617	1	66931	34697	ENSMUSG00000023873	1700010I14Rik	RIKEN cDNA 1700010I14 gene
chr2_24408025_24408525	chr2	24408025	24408525	501	*	-1.63227	1.02482e-05	-0.0241379	3' UTR	2	24367580	24414954	47375	1	215632	40445	ENSMUSG00000026979	Psd4	pleckstrin and Sec7 domain containing 4
chr5_103134814_103135314	chr5	103134814	103135314	501	*	-1.63227	1.02482e-05	-0.0241379	Intron (ENSMUST00000170792.8/26414, intron 2 of 13)	5	102907948	103211334	303387	2	26414	76020	ENSMUSG00000046709	Mapk10	mitogen-activated protein kinase 10
chr7_79314823_79315323	chr7	79314823	79315323	501	*	-1.63227	1.02482e-05	-0.0241379	Intron (ENSMUST00000037315.12/54608, intron 3 of 10)	7	79273199	79365508	92310	1	54608	41624	ENSMUSG00000039202	Abhd2	abhydrolase domain containing 2
chr8_72547375_72547875	chr8	72547375	72547875	501	*	-1.63227	1.02482e-05	-0.0241379	Promoter (<=1kb)	8	72494561	72548270	53710	2	70625	395	ENSMUSG00000045248	Med26	mediator complex subunit 26
chr11_7078915_7079415	chr11	7078915	7079415	501	*	-1.41504	1.03149e-05	-0.0287356	Exon (ENSMUST00000020706.4/432530, exon 2 of 20)	11	7063489	7178506	115018	1	432530	15426	ENSMUSG00000020431	Adcy1	adenylate cyclase 1
chr12_47121352_47121852	chr12	47121352	47121852	501	*	-1.04307	1.03149e-05	-0.0402299	Distal Intergenic	12	46694517	46818929	124413	2	664883	-302423	ENSMUSG00000021047	Nova1	NOVA alternative splicing regulator 1
chr14_24500479_24500979	chr14	24500479	24500979	501	*	-1.20436	1.0384e-05	-0.0344828	Distal Intergenic	14	24487125	24496959	9835	1	20088	13354	ENSMUSG00000025290	Rps24	ribosomal protein S24
chr15_100872114_100872614	chr15	100872114	100872614	501	*	-1.20436	1.0384e-05	-0.0344828	Promoter (2-3kb)	15	100869858	101045938	176081	1	20273	2256	ENSMUSG00000023033	Scn8a	sodium channel, voltage-gated, type VIII, alpha
chr16_34902209_34902709	chr16	34902209	34902709	501	*	-1.20436	1.0384e-05	-0.0344828	Intron (ENSMUST00000023538.8/107589, intron 11 of 31)	16	34935854	34939329	3476	2	76649	36620	ENSMUSG00000100593	1700119H24Rik	RIKEN cDNA 1700119H24 gene
chr2_169929873_169930373	chr2	169929873	169930373	501	*	-1.20436	1.0384e-05	-0.0344828	Intron (ENSMUST00000123300.2/228911, intron 1 of 1)	2	169962015	169963187	1173	2	446211	32814	ENSMUSG00000103935	AY702102	cDNA sequence AY702102
chr5_115906206_115906706	chr5	115906206	115906706	501	*	-1.20436	1.0384e-05	-0.0344828	Intron (ENSMUST00000147330.7/12704, intron 9 of 10)	5	115845278	116008947	163670	1	12704	60928	ENSMUSG00000029516	Cit	citron
chr14_20181595_20182095	chr14	20181595	20182095	501	*	-1.32193	1.05181e-05	-0.0310345	Promoter (<=1kb)	14	20140057	20181809	41753	2	16529	0	ENSMUSG00000023243	Kcnk5	potassium channel, subfamily K, member 5
chr19_22884471_22884971	chr19	22884471	22884971	501	*	-1.32193	1.05181e-05	-0.0310345	Intron (ENSMUST00000237357.1/226025, intron 10 of 24)	19	22750605	22750672	68	1	387200	133866	ENSMUSG00000065507	Mir204	microRNA 204
chr10_120701801_120702301	chr10	120701801	120702301	501	*	-1.75489	1.06627e-05	-0.0218391	Distal Intergenic	10	120765732	120778886	13155	1	70874	-63431	ENSMUSG00000044544	4921513I03Rik	RIKEN cDNA 4921513I03 gene
chr11_59427847_59428347	chr11	59427847	59428347	501	*	-1.06817	1.06627e-05	-0.0390805	Exon (ENSMUST00000010038.9/67826, exon 3 of 5)	11	59450045	59458567	8523	1	194952	-21698	ENSMUSG00000036819	Jmjd4	jumonji domain containing 4
chr12_69767739_69768239	chr12	69767739	69768239	501	*	-1.06817	1.06627e-05	-0.0390805	Intron (ENSMUST00000021377.4/71091, intron 3 of 9)	12	69763835	69763944	110	2	751538	-3795	ENSMUSG00000076065	Mir681	microRNA 681
chr15_103530324_103530824	chr15	103530324	103530824	501	*	-1.06817	1.06627e-05	-0.0390805	3' UTR	15	103530279	103538003	7725	2	58200	7179	ENSMUSG00000022490	Ppp1r1a	protein phosphatase 1, regulatory inhibitor subunit 1A
chr16_8204557_8205057	chr16	8204557	8205057	501	*	-1.06817	1.06627e-05	-0.0390805	Distal Intergenic	16	8409275	8425136	15862	2	74720	220079	ENSMUSG00000022715	Tmem114	transmembrane protein 114
chr16_35178357_35178857	chr16	35178357	35178857	501	*	-1.68806	1.06627e-05	-0.0229885	Intron (ENSMUST00000114913.2/224129, intron 1 of 20)	16	35154877	35305738	150862	1	224129	23480	ENSMUSG00000022840	Adcy5	adenylate cyclase 5
chr19_23523605_23524105	chr19	23523605	23524105	501	*	-1.68806	1.06627e-05	-0.0229885	Distal Intergenic	19	23302609	23448442	145834	2	71738	-75163	ENSMUSG00000033207	Mamdc2	MAM domain containing 2
chr19_58317154_58317654	chr19	58317154	58317654	501	*	-1.68806	1.06627e-05	-0.0229885	Intron (ENSMUST00000026076.13/14585, intron 5 of 10)	19	58235604	58455909	220306	2	14585	138255	ENSMUSG00000025089	Gfra1	glial cell line derived neurotrophic factor family receptor alpha 1
chr2_146256441_146256941	chr2	146256441	146256941	501	*	-1.75489	1.06627e-05	-0.0218391	Promoter (2-3kb)	2	146259286	146267160	7875	1	77806	-2345	ENSMUSG00000085958	A930019D19Rik	RIKEN cDNA A930019D19 gene
chr2_156474634_156475134	chr2	156474634	156475134	501	*	-1.06817	1.06627e-05	-0.0390805	Intron (ENSMUST00000103137.9/13821, intron 2 of 22)	2	156420909	156543214	122306	1	13821	53725	ENSMUSG00000027624	Epb41l1	erythrocyte membrane protein band 4.1 like 1
chr2_157016862_157017362	chr2	157016862	157017362	501	*	-1.68806	1.06627e-05	-0.0229885	3' UTR	2	156995265	157007154	11890	2	66934	-9708	ENSMUSG00000027635	Dsn1	DSN1 homolog, MIS12 kinetochore complex component
chr3_86808023_86808523	chr3	86808023	86808523	501	*	-1.68806	1.06627e-05	-0.0229885	Intron (ENSMUST00000191752.5/70762, intron 8 of 13)	3	86786151	86920852	134702	2	70762	112329	ENSMUSG00000028078	Dclk2	doublecortin-like kinase 2
chr4_155197036_155197536	chr4	155197036	155197536	501	*	-1.68806	1.06627e-05	-0.0229885	Intron (ENSMUST00000084103.9/20481, intron 2 of 7)	4	155154075	155222592	68518	2	20481	25056	ENSMUSG00000029050	Ski	ski sarcoma viral oncogene homolog (avian)
chr6_5402991_5403491	chr6	5402991	5403491	501	*	-1.75489	1.06627e-05	-0.0218391	Intron (ENSMUST00000043294.11/65255, intron 3 of 5)	6	5383386	5433022	49637	1	65255	19605	ENSMUSG00000042607	Asb4	ankyrin repeat and SOCS box-containing 4
chr6_126581434_126581934	chr6	126581434	126581934	501	*	-1.75489	1.06627e-05	-0.0218391	Distal Intergenic	6	126532551	126535412	2862	2	16493	-46022	ENSMUSG00000045534	Kcna5	potassium voltage-gated channel, shaker-related subfamily, member 5
chr7_79274484_79274984	chr7	79274484	79274984	501	*	-1.75489	1.06627e-05	-0.0218391	Promoter (1-2kb)	7	79273199	79365508	92310	1	54608	1285	ENSMUSG00000039202	Abhd2	abhydrolase domain containing 2
chr19_29641093_29641593	chr19	29641093	29641593	501	*	-1.1635	1.08645e-05	-0.0356322	Intron (ENSMUST00000159692.7/226090, intron 2 of 14)	19	29608214	29648415	40202	2	226090	6822	ENSMUSG00000046324	Ermp1	endoplasmic reticulum metallopeptidase 1
chr12_29368747_29369247	chr12	29368747	29369247	501	*	-1.09622	1.10066e-05	-0.037931	Distal Intergenic	12	29528384	29923213	394830	1	17933	-159137	ENSMUSG00000061911	Myt1l	myelin transcription factor 1-like
chr13_85189764_85190264	chr13	85189764	85190264	501	*	-1.09622	1.10066e-05	-0.037931	Promoter (<=1kb)	13	85189408	85223469	34062	1	66671	356	ENSMUSG00000021548	Ccnh	cyclin H
chr12_100110538_100111038	chr12	100110538	100111038	501	*	-1.12776	1.10641e-05	-0.0367816	Promoter (<=1kb)	12	100110154	100123405	13252	1	19179	384	ENSMUSG00000021178	Psmc1	protease (prosome, macropain) 26S subunit, ATPase 1
chr19_45363877_45364377	chr19	45363877	45364377	501	*	-1.12776	1.10641e-05	-0.0367816	Promoter (<=1kb)	19	45363734	45530013	166280	1	12234	143	ENSMUSG00000025217	Btrc	beta-transducin repeat containing protein
chr1_135152573_135153073	chr1	135152573	135153073	501	*	-2.32193	1.17081e-05	-0.0137931	Exon (ENSMUST00000027684.10/68724, exon 3 of 7)	1	135146824	135156269	9446	1	68724	5749	ENSMUSG00000026426	Arl8a	ADP-ribosylation factor-like 8A
chr1_184077429_184077929	chr1	184077429	184077929	501	*	-2.32193	1.17081e-05	-0.0137931	Distal Intergenic	1	184033030	184034301	1272	2	73363	-43128	ENSMUSG00000044854	1700056E22Rik	RIKEN cDNA 1700056E22 gene
chr1_190045753_190046253	chr1	190045753	190046253	501	*	-2.32193	1.17081e-05	-0.0137931	Distal Intergenic	1	189880492	189922363	41872	2	226830	-123390	ENSMUSG00000026603	Smyd2	SET and MYND domain containing 2
chr10_59566650_59567150	chr10	59566650	59567150	501	*	-2.32193	1.17081e-05	-0.0137931	Intron (ENSMUST00000020312.12/215999, intron 1 of 7)	10	59446984	59616692	169709	2	215999	49542	ENSMUSG00000009647	Mcu	mitochondrial calcium uniporter
chr11_88648591_88649091	chr11	88648591	88649091	501	*	-2.32193	1.17081e-05	-0.0137931	Intron (ENSMUST00000107909.7/76626, intron 5 of 13)	11	88339382	88718513	379132	2	76626	69422	ENSMUSG00000069769	Msi2	musashi RNA-binding protein 2
chr12_29892506_29893006	chr12	29892506	29893006	501	*	2.32193	1.17081e-05	0.0137931	Intron (ENSMUST00000218583.1/17933, intron 19 of 24)	12	29937608	30017658	80051	1	69675	-44602	ENSMUSG00000020674	Pxdn	peroxidasin
chr14_59204166_59204666	chr14	59204166	59204666	501	*	-2.32193	1.17081e-05	-0.0137931	Promoter (2-3kb)	14	59201209	59237265	36057	1	71330	2957	ENSMUSG00000035469	Rcbtb1	regulator of chromosome condensation (RCC1) and BTB (POZ) domain containing protein 1
chr15_57850795_57851295	chr15	57850795	57851295	501	*	-2.32193	1.17081e-05	-0.0137931	Distal Intergenic	15	57869502	57892448	22947	2	67819	41153	ENSMUSG00000022365	Derl1	Der1-like domain family, member 1
chr15_76263897_76264397	chr15	76263897	76264397	501	*	-2.32193	1.17081e-05	-0.0137931	Downstream (2-3kb)	15	76268089	76292572	24484	1	74281	-3692	ENSMUSG00000049653	Spatc1	spermatogenesis and centriole associated 1
chr15_93580608_93581108	chr15	93580608	93581108	501	*	-2.32193	1.17081e-05	-0.0137931	Intron (ENSMUST00000048982.10/106042, intron 1 of 7)	15	93499114	93595891	96778	2	106042	14783	ENSMUSG00000036158	Prickle1	prickle planar cell polarity protein 1
chr17_27443394_27443894	chr17	27443394	27443894	501	*	-2.32193	1.17081e-05	-0.0137931	Intron (ENSMUST00000118489.7/268934, intron 5 of 8)	17	27422387	27521403	99017	2	268934	77509	ENSMUSG00000063239	Grm4	glutamate receptor, metabotropic 4
chr17_56072862_56073362	chr17	56072862	56073362	501	*	-2.32193	1.17081e-05	-0.0137931	Promoter (1-2kb)	17	56067045	56075028	7984	2	66530	1666	ENSMUSG00000019578	Ubxn6	UBX domain protein 6
chr18_6165786_6166286	chr18	6165786	6166286	501	*	-2.32193	1.17081e-05	-0.0137931	Distal Intergenic	18	6024427	6136098	111672	2	75415	-29688	ENSMUSG00000041225	Arhgap12	Rho GTPase activating protein 12
chr2_26137055_26137555	chr2	26137055	26137555	501	*	-2.32193	1.17081e-05	-0.0137931	Promoter (2-3kb)	2	26136814	26140521	3708	2	109299	2966	ENSMUSG00000087679	Tmem250-ps	transmembrane protein 250, pseudogene
chr2_32690291_32690791	chr2	32690291	32690791	501	*	-2.32193	1.17081e-05	-0.0137931	Promoter (2-3kb)	2	32687630	32687766	137	2	102465885	-2525	ENSMUSG00000098972	Mir8093	microRNA 8093
chr4_56853883_56854383	chr4	56853883	56854383	501	*	-2.32193	1.17081e-05	-0.0137931	Intron (ENSMUST00000045142.14/54366, intron 1 of 18)	4	56810935	56865188	54254	2	54366	10805	ENSMUSG00000038816	Ctnnal1	catenin (cadherin associated protein), alpha-like 1
chr4_137960045_137960545	chr4	137960045	137960545	501	*	-2.32193	1.17081e-05	-0.0137931	Intron (ENSMUST00000102518.9/230857, intron 18 of 19)	4	137993022	138208508	215487	1	230861	-32477	ENSMUSG00000028760	Eif4g3	eukaryotic translation initiation factor 4 gamma, 3
chr5_73993969_73994469	chr5	73993969	73994469	501	*	-2.32193	1.17081e-05	-0.0137931	Distal Intergenic	5	73998453	74068431	69979	2	69727	73962	ENSMUSG00000054814	Usp46	ubiquitin specific peptidase 46
chr6_38693881_38694381	chr6	38693881	38694381	501	*	-2.32193	1.17081e-05	-0.0137931	Downstream (<1kb)	6	38663067	38680865	17799	1	665180	30814	ENSMUSG00000079598	Clec2l	C-type lectin domain family 2, member L
chr6_119218983_119219483	chr6	119218983	119219483	501	*	2.32193	1.17081e-05	0.0137931	Intron (ENSMUST00000112777.8/319618, intron 8 of 8)	6	119236526	119352407	115882	1	319734	-17043	ENSMUSG00000041460	Cacna2d4	calcium channel, voltage-dependent, alpha 2/delta subunit 4
chr7_16617533_16618033	chr7	16617533	16618033	501	*	-2.32193	1.17081e-05	-0.0137931	Promoter (2-3kb)	7	16493719	16614993	121275	2	232906	-2540	ENSMUSG00000058230	Arhgap35	Rho GTPase activating protein 35
chr7_16893611_16894111	chr7	16893611	16894111	501	*	-2.32193	1.17081e-05	-0.0137931	Promoter (1-2kb)	7	16891786	16895436	3651	1	14709	1825	ENSMUSG00000063594	Gng8	guanine nucleotide binding protein (G protein), gamma 8
chr7_31094709_31095209	chr7	31094709	31095209	501	*	-2.32193	1.17081e-05	-0.0137931	Distal Intergenic	7	31068172	31076704	8533	2	17178	-18005	ENSMUSG00000057092	Fxyd3	FXYD domain-containing ion transport regulator 3
chr9_44693761_44694261	chr9	44693761	44694261	501	*	-2.32193	1.17081e-05	-0.0137931	Exon (ENSMUST00000147495.7/102693, exon 19 of 22)	9	44673233	44686305	13073	1	58866	20528	ENSMUSG00000032098	Treh	trehalase (brush-border membrane glycoprotein)
chr9_107751220_107751720	chr9	107751220	107751720	501	*	-2.32193	1.17081e-05	-0.0137931	3' UTR	9	107740371	107770996	30626	2	83486	19276	ENSMUSG00000032580	Rbm5	RNA binding motif protein 5
chrX_77451042_77451542	chrX	77451042	77451542	501	*	-2.32193	1.17081e-05	-0.0137931	Distal Intergenic	20	77511013	77662983	151971	1	21372	-59471	ENSMUSG00000025246	Tbl1x	transducin (beta)-like 1 X-linked
chr17_4994720_4995220	chr17	4994720	4995220	501	*	-1	1.19064e-05	-0.0413793	Promoter (<=1kb)	17	4994332	5347656	353325	1	239985	388	ENSMUSG00000069729	Arid1b	AT rich interactive domain 1B (SWI-like)
chr4_103214592_103215092	chr4	103214592	103215092	501	*	-1	1.19064e-05	-0.0413793	Promoter (<=1kb)	4	103170649	103215164	44516	2	242585	72	ENSMUSG00000028521	Slc35d1	solute carrier family 35 (UDP-glucuronic acid/UDP-N-acetylgalactosamine dual transporter), member D1
chr10_82666412_82666912	chr10	82666412	82666912	501	*	-1.26303	1.20148e-05	-0.0321839	Intron (ENSMUST00000020485.9/74782, intron 3 of 9)	10	82650433	82690650	40218	2	74782	23738	ENSMUSG00000020251	Glt8d2	glycosyltransferase 8 domain containing 2
chr14_48207695_48208195	chr14	48207695	48208195	501	*	-1.26303	1.20148e-05	-0.0321839	Intron (ENSMUST00000073150.5/93834, intron 2 of 5)	14	48198716	48228413	29698	1	624367	8979	ENSMUSG00000021846	Gm6498	glyceraldehyde-3-phosphate dehydrogenase pseudogene
chr15_102942742_102943242	chr15	102942742	102943242	501	*	-1.26303	1.20148e-05	-0.0321839	Downstream (<1kb)	15	102944062	102947730	3669	2	100503872	4488	ENSMUSG00000086903	Hotair	HOX transcript antisense RNA (non-protein coding)
chr4_151655683_151656183	chr4	151655683	151656183	501	*	-1.26303	1.20148e-05	-0.0321839	Intron (ENSMUST00000169423.8/100072, intron 3 of 24)	4	150917322	151861876	944555	2	100072	205693	ENSMUSG00000014592	Camta1	calmodulin binding transcription activator 1
chr9_21937574_21938074	chr9	21937574	21938074	501	*	-1.26303	1.20148e-05	-0.0321839	Promoter (<=1kb)	9	21937033	21948907	11875	1	235044	541	ENSMUSG00000040563	Plppr2	phospholipid phosphatase related 2
chr12_72234807_72235307	chr12	72234807	72235307	501	*	-1.44057	1.22899e-05	-0.0275862	Intron (ENSMUST00000150156.1/104001, intron 1 of 6)	12	72101300	72185029	83730	2	73936	-49778	ENSMUSG00000021086	Ccdc175	coiled-coil domain containing 175
chr17_25474243_25474743	chr17	25474243	25474743	501	*	-1.44057	1.22899e-05	-0.0275862	Exon (ENSMUST00000234104.1/71840, exon 3 of 6)	17	25454615	25476602	21988	1	71840	19628	ENSMUSG00000024175	Tekt4	tektin 4
chr17_35638738_35639238	chr17	35638738	35639238	501	*	-1.44057	1.22899e-05	-0.0275862	Intron (ENSMUST00000174521.1/433102, intron 3 of 3)	17	35635752	35643695	7944	2	268949	4457	ENSMUSG00000073408	Mucl3	mucin like 3
chr9_22306720_22307220	chr9	22306720	22307220	501	*	-1.44057	1.22899e-05	-0.0275862	Promoter (<=1kb)	9	22276748	22307648	30901	2	235050	428	ENSMUSG00000066829	Zfp810	zinc finger protein 810
chr11_114792161_114792661	chr11	114792161	114792661	501	*	-1.02106	1.28828e-05	-0.0402299	Exon (ENSMUST00000156053.7/72014, exon 2 of 2)	11	114791217	114795945	4729	2	72014	3284	ENSMUSG00000000202	Btbd17	BTB (POZ) domain containing 17
chr17_87530364_87530864	chr17	87530364	87530864	501	*	-1.02106	1.28828e-05	-0.0402299	Exon (ENSMUST00000234692.1/ENSMUST00000234692.1, exon 1 of 2)	17	87433412	87446935	13524	2	12314	-83429	ENSMUSG00000036438	Calm2	calmodulin 2
chr9_69290370_69290870	chr9	69290370	69290870	501	*	-1.02106	1.28828e-05	-0.0402299	Intron (ENSMUST00000034766.13/19883, intron 2 of 10)	9	69348889	69364247	15359	2	102642202	73377	ENSMUSG00000086648	Gm15511	predicted gene 15511
chr1_71557533_71558033	chr1	71557533	71558033	501	*	-1.3388	1.32839e-05	-0.0298851	Promoter (<=1kb)	1	71557150	71579631	22482	1	108147	383	ENSMUSG00000026192	Atic	5-aminoimidazole-4-carboxamide ribonucleotide formyltransferase/IMP cyclohydrolase
chr15_6981004_6981504	chr15	6981004	6981504	501	*	-1.3388	1.32839e-05	-0.0298851	Distal Intergenic	15	6813577	6874969	61393	2	18414	-106035	ENSMUSG00000022146	Osmr	oncostatin M receptor
chr10_63428612_63429112	chr10	63428612	63429112	501	*	-1.21299	1.36223e-05	-0.0333333	Promoter (<=1kb)	10	63430098	65003667	1573570	1	216033	-986	ENSMUSG00000060843	Ctnna3	catenin (cadherin associated protein), alpha 3
chr2_65940420_65940920	chr2	65940420	65940920	501	*	-1.21299	1.36223e-05	-0.0333333	Intron (ENSMUST00000122912.7/77771, intron 3 of 6)	2	65845767	66031546	185780	1	77771	94653	ENSMUSG00000044647	Csrnp3	cysteine-serine-rich nuclear protein 3
chr2_104714427_104714927	chr2	104714427	104714927	501	*	-1.21299	1.36223e-05	-0.0333333	Promoter (1-2kb)	2	104713926	104716379	2454	2	241593	1452	ENSMUSG00000074997	Pin1rt1	protein (peptidyl-prolyl cis/trans isomerase) NIMA-interacting 1, retrogene 1
chr7_91090155_91090655	chr7	91090155	91090655	501	*	-1.21299	1.36223e-05	-0.0333333	Intron (ENSMUST00000231777.2/23859, intron 6 of 27)	7	90477231	92449247	1972017	1	23859	612924	ENSMUSG00000052572	Dlg2	discs large MAGUK scaffold protein 2
chr11_71032914_71033414	chr11	71032914	71033414	501	*	-1.04439	1.37866e-05	-0.0390805	Promoter (<=1kb)	11	71031941	71033513	1573	2	103712	99	ENSMUSG00000018451	6330403K07Rik	RIKEN cDNA 6330403K07 gene
chr2_173159616_173160116	chr2	173159616	173160116	501	*	-1.04439	1.37866e-05	-0.0390805	Distal Intergenic	2	173153048	173159273	6226	1	18534	6568	ENSMUSG00000027513	Pck1	phosphoenolpyruvate carboxykinase 1, cytosolic
chr13_98299026_98299526	chr13	98299026	98299526	501	*	-1.07039	1.45935e-05	-0.037931	Intron (ENSMUST00000180066.8/ENSMUST00000180066.8, intron 3 of 6)	13	98309896	98317006	7111	2	218490	17480	ENSMUSG00000021660	Btf3	basic transcription factor 3
chr6_70844722_70845222	chr6	70844722	70845222	501	*	-1.07039	1.45935e-05	-0.037931	Promoter (<=1kb)	6	70844515	70905245	60731	1	13666	207	ENSMUSG00000031668	Eif2ak3	eukaryotic translation initiation factor 2 alpha kinase 3
chr16_5306559_5307059	chr16	5306559	5307059	501	*	-1.16993	1.45981e-05	-0.0344828	Exon (ENSMUST00000229837.1/ENSMUST00000229837.1, exon 1 of 3)	16	5244152	5255983	11832	2	70511	-50576	ENSMUSG00000022544	Eef2kmt	eukaryotic elongation factor 2 lysine methyltransferase
chr4_34231250_34231750	chr4	34231250	34231750	501	*	-1.16993	1.45981e-05	-0.0344828	Distal Intergenic	4	34024874	34050191	25318	2	67652	-181059	ENSMUSG00000028264	Spaca1	sperm acrosome associated 1
chr9_112098133_112098633	chr9	112098133	112098633	501	*	-1.09954	1.50836e-05	-0.0367816	Intron (ENSMUST00000070218.11/74100, intron 17 of 18)	9	112118636	112118711	76	2	723815	20078	ENSMUSG00000065441	Mir128-2	microRNA 128-2
chr1_184999114_184999614	chr1	184999114	184999614	501	*	-1.13245	1.51156e-05	-0.0356322	Promoter (<=1kb)	1	184896789	184999570	102782	2	226778	0	ENSMUSG00000026620	Mark1	MAP/microtubule affinity regulating kinase 1
chr14_31217578_31218078	chr14	31217578	31218078	501	*	-1.46949	1.55249e-05	-0.0264368	Promoter (<=1kb)	14	31217860	31230352	12493	1	218877	0	ENSMUSG00000021904	Sema3g	sema domain, immunoglobulin domain (Ig), short basic domain, secreted, (semaphorin) 3G
chr9_37031290_37031790	chr9	37031290	37031790	501	*	-1.27563	1.65877e-05	-0.0310345	Intron (ENSMUST00000177218.7/208076, intron 1 of 10)	9	36890982	37147407	256426	2	208076	115617	ENSMUSG00000035934	Pknox2	Pbx/knotted 1 homeobox 2
chr6_126588758_126589258	chr6	126588758	126589258	501	*	-1	1.70219e-05	-0.0402299	Distal Intergenic	6	126532551	126535412	2862	2	16493	-53346	ENSMUSG00000045534	Kcna5	potassium voltage-gated channel, shaker-related subfamily, member 5
chr7_73390957_73391457	chr7	73390957	73391457	501	*	-1	1.70219e-05	-0.0402299	5' UTR	7	73314003	73375774	61772	2	319783	-15183	ENSMUSG00000097756	A730056A06Rik	RIKEN cDNA A730056A06 gene
chr17_56233723_56234223	chr17	56233723	56234223	501	*	-1.35755	1.75835e-05	-0.0287356	Distal Intergenic	17	56241716	56242805	1090	1	320593	-7493	ENSMUSG00000117172	A230051N06Rik	RIKEN cDNA A230051N06 gene
chr17_83288039_83288539	chr17	83288039	83288539	501	*	-1.35755	1.75835e-05	-0.0287356	Distal Intergenic	17	83350931	83480361	129431	1	78798	-62392	ENSMUSG00000032624	Eml4	echinoderm microtubule associated protein like 4
chr19_42429330_42429830	chr19	42429330	42429830	501	*	-1.35755	1.75835e-05	-0.0287356	Promoter (1-2kb)	19	42268287	42431785	163499	2	72832	1955	ENSMUSG00000042401	Crtac1	cartilage acidic protein 1
chr3_62339694_62340194	chr3	62339694	62340194	501	*	-1.35755	1.75835e-05	-0.0287356	Promoter (1-2kb)	3	62338344	62462221	123878	1	622434	1350	ENSMUSG00000036885	Arhgef26	Rho guanine nucleotide exchange factor (GEF) 26
chr1_79823885_79824385	chr1	79823885	79824385	501	*	-2	1.76179e-05	-0.0172414	Intron (ENSMUST00000027467.10/20720, intron 1 of 8)	1	79794197	79861180	66984	2	20720	36795	ENSMUSG00000026249	Serpine2	serine (or cysteine) peptidase inhibitor, clade E, member 2
chr5_133311235_133311735	chr5	133311235	133311735	501	*	-2	1.76179e-05	-0.0172414	Distal Intergenic	5	131437333	132543344	1106012	2	319974	-767891	ENSMUSG00000029673	Auts2	autism susceptibility candidate 2
chr6_9210695_9211195	chr6	9210695	9211195	501	*	-2	1.76179e-05	-0.0172414	Intron (ENSMUST00000160300.1/18231, intron 2 of 2)	6	8948431	9249032	300602	1	18231	262264	ENSMUSG00000046178	Nxph1	neurexophilin 1
chr9_48686870_48687370	chr9	48686870	48687370	501	*	-2	1.76179e-05	-0.0172414	Intron (ENSMUST00000093852.4/235320, intron 4 of 6)	9	48591877	48605153	13277	2	18113	-81717	ENSMUSG00000032271	Nnmt	nicotinamide N-methyltransferase
chr14_79140811_79141311	chr14	79140811	79141311	501	*	-1.0217	1.84748e-05	-0.0390805	Intron (ENSMUST00000040990.6/219189, intron 37 of 44)	14	79178894	79199190	20297	2	100043765	57879	ENSMUSG00000115111	Gm4632	predicted gene 4632
chr15_6708113_6708613	chr15	6708113	6708613	501	*	-1.0217	1.84748e-05	-0.0390805	Promoter (<=1kb)	15	6708379	6800401	92023	1	78757	0	ENSMUSG00000050310	Rictor	RPTOR independent companion of MTOR, complex 2
chr6_97277859_97278359	chr6	97277859	97278359	501	*	-1.0217	1.84748e-05	-0.0390805	Distal Intergenic	6	97238534	97252759	14226	2	320502	-25100	ENSMUSG00000044086	Lmod3	leiomodin 3 (fetal)
chr4_49567523_49568023	chr4	49567523	49568023	501	*	-1.22239	1.89765e-05	-0.0321839	Distal Intergenic	4	49535995	49549546	13552	2	230163	-17977	ENSMUSG00000028307	Aldob	aldolase B, fructose-bisphosphate
chr2_10372218_10372718	chr2	10372218	10372718	501	*	-1.5025	1.90623e-05	-0.0252874	Promoter (1-2kb)	2	10370510	10595253	224744	1	353282	1708	ENSMUSG00000061186	Sfmbt2	Scm-like with four mbt domains 2
chr7_139899424_139899924	chr7	139899424	139899924	501	*	-1.5025	1.90623e-05	-0.0252874	Intron (ENSMUST00000053445.15/76484, intron 1 of 30)	7	139894696	139941537	46842	1	76484	4728	ENSMUSG00000066129	Kndc1	kinase non-catalytic C-lobe domain (KIND) containing 1
chr11_88048108_88048608	chr11	88048108	88048608	501	*	-1.0458	1.99512e-05	-0.037931	Promoter (<=1kb)	11	88047373	88053755	6383	1	110809	735	ENSMUSG00000018379	Srsf1	serine and arginine-rich splicing factor 1
chr2_30657646_30658146	chr2	30657646	30658146	501	*	-1.0458	1.99512e-05	-0.037931	Intron (ENSMUST00000146702.1/ENSMUST00000146702.1, intron 2 of 3)	2	30658468	30678011	19544	2	665635	19865	NA	Gm14486	predicted gene 14486
chr14_33313524_33314024	chr14	33313524	33314024	501	*	-1.07276	2.09507e-05	-0.0367816	Intron (ENSMUST00000111956.8/239027, intron 4 of 10)	14	33214026	33369934	155909	1	239027	99498	ENSMUSG00000063506	Arhgap22	Rho GTPase activating protein 22
chr16_21787602_21788102	chr16	21787602	21788102	501	*	-1.07276	2.09507e-05	-0.0367816	Promoter (<=1kb)	16	21761287	21787807	26521	2	74147	0	ENSMUSG00000022853	Ehhadh	enoyl-Coenzyme A, hydratase/3-hydroxyacyl Coenzyme A dehydrogenase
chr5_120710210_120710710	chr5	120710210	120710710	501	*	-1.07276	2.09507e-05	-0.0367816	Promoter (1-2kb)	5	120680202	120711927	31726	2	14357	1217	ENSMUSG00000029603	Dtx1	deltex 1, E3 ubiquitin ligase
chr13_43172310_43172810	chr13	43172310	43172810	501	*	-1.1375	2.14845e-05	-0.0344828	Promoter (<=1kb)	13	43151740	43171501	19762	2	67046	-809	ENSMUSG00000021368	Tbc1d7	TBC1 domain family, member 7
chr2_74681947_74682447	chr2	74681947	74682447	501	*	-1.1375	2.14845e-05	-0.0344828	Promoter (2-3kb)	2	74679557	74694194	14638	1	15431	2390	ENSMUSG00000042499	Hoxd11	homeobox D11
chr9_65826542_65827042	chr9	65826542	65827042	501	*	-1.1375	2.14845e-05	-0.0344828	Promoter (<=1kb)	9	65692391	65827564	135174	2	214812	522	ENSMUSG00000040524	Zfp609	zinc finger protein 609
chr10_34301507_34302007	chr10	34301507	34302007	501	*	-1.28951	2.25269e-05	-0.0298851	Intron (ENSMUST00000129363.7/319638, intron 2 of 2)	10	34297442	34301320	3879	1	72480	4065	ENSMUSG00000039485	Tspyl4	TSPY-like 4
chr2_143018457_143018957	chr2	143018457	143018957	501	*	-1.28951	2.25269e-05	-0.0298851	Distal Intergenic	2	143063039	143072853	9815	1	20639	-44082	ENSMUSG00000008333	Snrpb2	U2 small nuclear ribonucleoprotein B
chr5_139754675_139755175	chr5	139754675	139755175	501	*	-1.28951	2.25269e-05	-0.0298851	Exon (ENSMUST00000072607.8/68510, exon 40 of 47)	5	139767879	139767943	65	2	102465628	12768	ENSMUSG00000098574	Mir7037	microRNA 7037
chr10_108332597_108333097	chr10	108332597	108333097	501	*	-1.54057	2.28713e-05	-0.0241379	Promoter (<=1kb)	10	108332121	108414240	82120	1	114774	476	ENSMUSG00000035873	Pawr	PRKC, apoptosis, WT1, regulator
chr4_137862883_137863383	chr4	137862883	137863383	501	*	-1.54057	2.28713e-05	-0.0241379	Promoter (<=1kb)	4	137862237	137965229	102993	1	230857	646	ENSMUSG00000057530	Ece1	endothelin converting enzyme 1
chr5_150551533_150552033	chr5	150551533	150552033	501	*	-1.54057	2.28713e-05	-0.0241379	Exon (ENSMUST00000157857.1/ENSMUST00000157857.1, exon 1 of 1)	5	150522630	150569747	47118	1	12190	28903	ENSMUSG00000041147	Brca2	breast cancer 2, early onset
chr6_34371632_34372132	chr6	34371632	34372132	501	*	-1.54057	2.28713e-05	-0.0241379	Distal Intergenic	6	34384218	34396950	12733	1	67861	-12086	ENSMUSG00000061758	Akr1b10	aldo-keto reductase family 1, member B10 (aldose reductase)
chr8_120222910_120223410	chr8	120222910	120223410	501	*	-1.54057	2.28713e-05	-0.0241379	Intron (ENSMUST00000127664.1/108148, intron 1 of 15)	8	120204434	120228230	23797	2	434353	4820	ENSMUSG00000097960	A330074K22Rik	RIKEN cDNA A330074K22 gene
chr12_27599102_27599602	chr12	27599102	27599602	501	*	-1.37851	2.29652e-05	-0.0275862	Intron (ENSMUST00000220893.1/ENSMUST00000220893.1, intron 1 of 3)	12	27334264	27342574	8311	2	20666	-256528	ENSMUSG00000063632	Sox11	SRY (sex determining region Y)-box 11
chr14_54494178_54494678	chr14	54494178	54494678	501	*	-1.37851	2.29652e-05	-0.0275862	Distal Intergenic	14	54476100	54480431	4332	1	140743	18078	ENSMUSG00000022176	Rem2	rad and gem related GTP binding protein 2
chr2_28517120_28517620	chr2	28517120	28517620	501	*	-1.37851	2.29652e-05	-0.0275862	Intron (ENSMUST00000135803.7/19730, intron 1 of 3)	2	28513125	28553081	39957	1	19730	3995	ENSMUSG00000026821	Ralgds	ral guanine nucleotide dissociation stimulator
chr2_30687247_30687747	chr2	30687247	30687747	501	*	-1.37851	2.29652e-05	-0.0275862	Intron (ENSMUST00000146702.1/ENSMUST00000146702.1, intron 2 of 3)	2	30658468	30678011	19544	2	665635	-9236	NA	Gm14486	predicted gene 14486
chr4_11006945_11007445	chr4	11006945	11007445	501	*	-1.37851	2.29652e-05	-0.0275862	Promoter (<=1kb)	4	10988662	11007927	19266	2	71801	482	ENSMUSG00000049969	Plekhf2	pleckstrin homology domain containing, family F (with FYVE domain) member 2
chr4_132259154_132259654	chr4	132259154	132259654	501	*	-1.37851	2.29652e-05	-0.0275862	Promoter (1-2kb)	4	132221025	132261602	40578	2	56809	1948	ENSMUSG00000028901	Gmeb1	glucocorticoid modulatory element binding protein 1
chr6_88900978_88901478	chr6	88900978	88901478	501	*	-1.37851	2.29652e-05	-0.0275862	Promoter (<=1kb)	6	88902251	88912238	9988	1	24100	-773	ENSMUSG00000002871	Tpra1	transmembrane protein, adipocyte asscociated 1
chr7_24564574_24565074	chr7	24564574	24565074	501	*	-1.37851	2.29652e-05	-0.0275862	Intron (ENSMUST00000205573.1/22594, intron 5 of 18)	7	24546289	24573440	27152	1	22594	18285	ENSMUSG00000051768	Xrcc1	X-ray repair complementing defective repair in Chinese hamster cells 1
chr8_99421455_99421955	chr8	99421455	99421955	501	*	-1.37851	2.29652e-05	-0.0275862	Exon (ENSMUST00000064349.5/234624, exon 3 of 3)	8	99416642	99733438	316797	1	234624	4813	ENSMUSG00000052479	A330008L17Rik	RIKEN cDNA A330008L17 gene
chr1_174550295_174550795	chr1	174550295	174550795	501	*	-1.87447	2.49191e-05	-0.0183908	Intron (ENSMUST00000030039.12/54418, intron 2 of 17)	1	174501825	174822729	320905	1	54418	48470	ENSMUSG00000028354	Fmn2	formin 2
chr14_65971416_65971916	chr14	65971416	65971916	501	*	-1.87447	2.49191e-05	-0.0183908	Promoter (2-3kb)	14	65968483	65981547	13065	1	12759	2933	ENSMUSG00000022037	Clu	clusterin
chr15_62075108_62075608	chr15	62075108	62075608	501	*	-1.87447	2.49191e-05	-0.0183908	Intron (ENSMUST00000182956.7/19296, intron 1 of 6)	15	62037986	62378096	340111	1	19296	37122	ENSMUSG00000097039	Pvt1	Pvt1 oncogene
chr17_56268064_56268564	chr17	56268064	56268564	501	*	-1.87447	2.49191e-05	-0.0183908	Downstream (<1kb)	17	56269319	56276786	7468	2	106759	8222	ENSMUSG00000047123	Ticam1	toll-like receptor adaptor molecule 1
chr2_32538362_32538862	chr2	32538362	32538862	501	*	-1.87447	2.49191e-05	-0.0183908	Intron (ENSMUST00000136816.7/98952, intron 1 of 9)	2	32535332	32569756	34425	1	98952	3030	ENSMUSG00000039157	Fam102a	family with sequence similarity 102, member A
chr2_79774399_79774899	chr2	79774399	79774899	501	*	-1.87447	2.49191e-05	-0.0183908	Intron (ENSMUST00000090760.8/75276, intron 4 of 4)	2	79707780	79818496	110717	1	75276	66619	ENSMUSG00000034683	Ppp1r1c	protein phosphatase 1, regulatory inhibitor subunit 1C
chr2_155671178_155671678	chr2	155671178	155671678	501	*	-1.87447	2.49191e-05	-0.0183908	Intron (ENSMUST00000041059.11/56407, intron 2 of 18)	2	155634271	155692384	58114	2	56407	20706	ENSMUSG00000038324	Trpc4ap	transient receptor potential cation channel, subfamily C, member 4 associated protein
chr4_53919160_53919660	chr4	53919160	53919660	501	*	-1.87447	2.49191e-05	-0.0183908	Distal Intergenic	4	53826045	53862019	35975	1	52076	93115	ENSMUSG00000028420	Tmem38b	transmembrane protein 38B
chr4_151345611_151346111	chr4	151345611	151346111	501	*	-1.87447	2.49191e-05	-0.0183908	Intron (ENSMUST00000169423.8/100072, intron 5 of 24)	4	151089570	151091449	1880	1	105704528	256041	ENSMUSG00000078491	Gm13090	predicted gene 13090
chr4_154157338_154157838	chr4	154157338	154157838	501	*	-1.87447	2.49191e-05	-0.0183908	Promoter (2-3kb)	4	154157485	154160666	3182	2	67808	2828	ENSMUSG00000029030	Tprgl	transformation related protein 63 regulated like
chr5_111918254_111918754	chr5	111918254	111918754	501	*	-1.87447	2.49191e-05	-0.0183908	Distal Intergenic	5	111734284	111761725	27442	2	269683	-156529	ENSMUSG00000085271	E130006D01Rik	RIKEN cDNA E130006D01 gene
chr8_14859339_14859839	chr8	14859339	14859839	501	*	-1.87447	2.49191e-05	-0.0183908	Distal Intergenic	8	14881335	14901720	20386	1	26889	-21496	ENSMUSG00000026317	Cln8	CLN8 transmembrane ER and ERGIC protein
chr2_63090454_63090954	chr2	63090454	63090954	501	*	-1.23266	2.59393e-05	-0.0310345	Intron (ENSMUST00000075052.9/170738, intron 2 of 15)	2	62693414	63184287	490874	2	170738	93333	ENSMUSG00000059742	Kcnh7	potassium voltage-gated channel, subfamily H (eag-related), member 7
chr11_102395057_102395557	chr11	102395057	102395557	501	*	-1.58496	2.60531e-05	-0.0229885	Promoter (1-2kb)	11	102393403	102402555	9153	1	51799	1654	ENSMUSG00000006575	Rundc3a	RUN domain containing 3A
chr13_64153880_64154380	chr13	64153880	64154380	501	*	-1.58496	2.60531e-05	-0.0229885	Promoter (<=1kb)	13	64133018	64153202	20185	2	238673	-678	ENSMUSG00000044934	Zfp367	zinc finger protein 367
chr15_67434253_67434753	chr15	67434253	67434753	501	*	-1.58496	2.60531e-05	-0.0229885	Distal Intergenic	15	67226769	67377094	150326	1	69334	207484	ENSMUSG00000102069	1700012I11Rik	RIKEN cDNA 1700012I11 gene
chr18_40360168_40360668	chr18	40360168	40360668	501	*	-1.58496	2.60531e-05	-0.0229885	Intron (ENSMUST00000236889.1/383348, intron 2 of 2)	18	40257023	40531630	274608	1	383348	103145	ENSMUSG00000051401	Kctd16	potassium channel tetramerisation domain containing 16
chr2_72389920_72390420	chr2	72389920	72390420	501	*	-1.58496	2.60531e-05	-0.0229885	Intron (ENSMUST00000090824.11/65964, intron 10 of 19)	2	72476159	72486893	10735	1	66953	-85739	ENSMUSG00000055612	Cdca7	cell division cycle associated 7
chr2_95210514_95211014	chr2	95210514	95211014	501	*	-1.58496	2.60531e-05	-0.0229885	Distal Intergenic	2	94411682	94438136	26455	2	11800	-772378	ENSMUSG00000027193	Api5	apoptosis inhibitor 5
chr4_44292504_44293004	chr4	44292504	44293004	501	*	-1.58496	2.60531e-05	-0.0229885	Distal Intergenic	4	44300876	44364675	63800	1	17279	-7872	ENSMUSG00000035683	Melk	maternal embryonic leucine zipper kinase
chr15_24428922_24429422	chr15	24428922	24429422	501	*	-1.02237	2.6094e-05	-0.037931	Distal Intergenic	15	25363277	25413764	50488	2	70350	984342	ENSMUSG00000045763	Basp1	brain abundant, membrane attached signal protein 1
chr8_64732924_64733424	chr8	64732924	64733424	501	*	-1.04731	2.80968e-05	-0.0367816	Promoter (<=1kb)	8	64718139	64733792	15654	2	66234	368	ENSMUSG00000031604	Msmo1	methylsterol monoxygenase 1
chr3_143379137_143379637	chr3	143379137	143379637	501	*	-1.18442	2.83531e-05	-0.0321839	Distal Intergenic	3	143243055	143259884	16830	1	320072	136082	ENSMUSG00000105923	A830019L24Rik	RIKEN cDNA A830019L24 gene
chr4_85884728_85885228	chr4	85884728	85885228	501	*	-1.18442	2.83531e-05	-0.0321839	Intron (ENSMUST00000213098.1/77739, intron 2 of 3)	4	85514172	86428385	914214	1	77739	370556	ENSMUSG00000066113	Adamtsl1	ADAMTS-like 1
chr11_75234749_75235249	chr11	75234749	75235249	501	*	-1.77761	2.86293e-05	-0.0195402	Intron (ENSMUST00000102514.3/237847, intron 1 of 1)	11	75193783	75267769	73987	1	237847	40966	ENSMUSG00000045287	Rtn4rl1	reticulon 4 receptor-like 1
chr11_95513250_95513750	chr11	95513250	95513750	501	*	-1.77761	2.86293e-05	-0.0195402	Promoter (<=1kb)	11	95509845	95514570	4726	2	104079	820	ENSMUSG00000046719	Nxph3	neurexophilin 3
chr11_98050229_98050729	chr11	98050229	98050729	501	*	-1.77761	2.86293e-05	-0.0195402	Promoter (2-3kb)	11	98036623	98053462	16840	2	217154	2733	ENSMUSG00000017400	Stac2	SH3 and cysteine rich domain 2
chr12_65072101_65072601	chr12	65072101	65072601	501	*	-1.77761	2.86293e-05	-0.0195402	Promoter (1-2kb)	12	65062424	65074007	11584	2	30795	1406	ENSMUSG00000020949	Fkbp3	FK506 binding protein 3
chr12_73949711_73950211	chr12	73949711	73950211	501	*	-1.07529	2.86293e-05	-0.0356322	Exon (ENSMUST00000221427.1/ENSMUST00000221427.1, exon 1 of 3)	12	73937653	73988966	51314	1	75627	12058	ENSMUSG00000021113	Snapc1	small nuclear RNA activating complex, polypeptide 1
chr12_86890516_86891016	chr12	86890516	86891016	501	*	-1.77761	2.86293e-05	-0.0195402	Distal Intergenic	12	86880701	86884798	4098	2	238330	-5718	ENSMUSG00000034168	Irf2bpl	interferon regulatory factor 2 binding protein-like
chr13_4110451_4110951	chr13	4110451	4110951	501	*	-1.77761	2.86293e-05	-0.0195402	Distal Intergenic	13	4132615	4150654	18040	2	105349	39703	ENSMUSG00000021214	Akr1c18	aldo-keto reductase family 1, member C18
chr13_32846137_32846637	chr13	32846137	32846637	501	*	1.77761	2.86293e-05	0.0195402	Intron (ENSMUST00000076352.7/66222, intron 4 of 6)	13	32842092	32851185	9094	2	66222	4548	ENSMUSG00000044734	Serpinb1a	serine (or cysteine) peptidase inhibitor, clade B, member 1a
chr13_54280295_54280795	chr13	54280295	54280795	501	*	1.63743	2.86293e-05	0.0218391	Distal Intergenic	13	54301959	54383917	81959	1	12890	-21164	ENSMUSG00000025867	Cplx2	complexin 2
chr16_4551003_4551503	chr16	4551003	4551503	501	*	-1.07529	2.86293e-05	-0.0356322	Exon (ENSMUST00000005862.8/83383, exon 4 of 7)	16	4544661	4559854	15194	2	83383	8351	ENSMUSG00000005718	Tfap4	transcription factor AP4
chr17_6097829_6098329	chr17	6097829	6098329	501	*	-1.63743	2.86293e-05	-0.0218391	Distal Intergenic	17	6106479	6251128	144650	1	68842	-8150	ENSMUSG00000034377	Tulp4	tubby like protein 4
chr17_43241009_43241509	chr17	43241009	43241509	501	*	-1.63743	2.86293e-05	-0.0218391	Distal Intergenic	17	43270329	43324737	54409	1	77596	-28820	ENSMUSG00000041293	Adgrf1	adhesion G protein-coupled receptor F1
chr19_6389232_6389732	chr19	6389232	6389732	501	*	-1.63743	2.86293e-05	-0.0218391	Exon (ENSMUST00000035269.14/19309, exon 9 of 20)	19	6384399	6398459	14061	1	19309	4833	ENSMUSG00000032648	Pygm	muscle glycogen phosphorylase
chr19_41514801_41515301	chr19	41514801	41515301	501	*	-1.63743	2.86293e-05	-0.0218391	Intron (ENSMUST00000067795.12/212391, intron 2 of 7)	19	41482637	41586536	103900	1	212391	32164	ENSMUSG00000025019	Lcor	ligand dependent nuclear receptor corepressor
chr2_178156056_178156556	chr2	178156056	178156556	501	*	-1.77761	2.86293e-05	-0.0195402	Intron (ENSMUST00000108917.7/74189, intron 1 of 12)	2	178118975	178338492	219518	1	74189	37081	ENSMUSG00000027525	Phactr3	phosphatase and actin regulator 3
chr3_88436605_88437105	chr3	88436605	88437105	501	*	-1.63743	2.86293e-05	-0.0218391	3' UTR	3	88440879	88440951	73	2	102465611	3846	ENSMUSG00000098655	Mir7011	microRNA 7011
chr4_45442142_45442642	chr4	45442142	45442642	501	*	-1.77761	2.86293e-05	-0.0195402	Intron (ENSMUST00000147926.7/230126, intron 4 of 4)	4	45395923	45408766	12844	2	230125	-33376	ENSMUSG00000045973	Slc25a51	solute carrier family 25, member 51
chr4_137723657_137724157	chr4	137723657	137724157	501	*	-1.77761	2.86293e-05	-0.0195402	Exon (ENSMUST00000141306.1/110351, exon 6 of 11)	4	137696979	137706606	9628	2	69808	-17051	ENSMUSG00000087476	Rap1gapos	RAP1 GTPase activating protein, opposite strand
chr5_67016407_67016907	chr5	67016407	67016907	501	*	-1.77761	2.86293e-05	-0.0195402	Exon (ENSMUST00000101164.10/77569, exon 14 of 26)	5	67094399	67099301	4903	2	18935	82394	ENSMUSG00000012520	Phox2b	paired-like homeobox 2b
chr6_91285337_91285837	chr6	91285337	91285837	501	*	-1.07529	2.86293e-05	-0.0356322	Distal Intergenic	6	91212455	91272540	60086	1	14115	72882	ENSMUSG00000064080	Fbln2	fibulin 2
chr8_11006304_11006804	chr8	11006304	11006804	501	*	-1.63743	2.86293e-05	-0.0218391	Promoter (1-2kb)	8	11007850	11054541	46692	1	619321	-1046	ENSMUSG00000096938	9530052E02Rik	RIKEN cDNA 9530052E02 gene
chr8_124430850_124431350	chr8	124430850	124431350	501	*	-1.07529	2.86293e-05	-0.0356322	Intron (ENSMUST00000052580.9/209966, intron 1 of 6)	8	124369049	124439658	70610	2	209966	8308	ENSMUSG00000050751	Pgbd5	piggyBac transposable element derived 5
chr9_50746048_50746548	chr9	50746048	50746548	501	*	-1.07529	2.86293e-05	-0.0356322	Promoter (<=1kb)	9	50739691	50746536	6846	2	66952	0	ENSMUSG00000032062	2310030G06Rik	RIKEN cDNA 2310030G06 gene
chr9_72639887_72640387	chr9	72639887	72640387	501	*	-1.07529	2.86293e-05	-0.0356322	Distal Intergenic	9	72662346	72749852	87507	1	17999	-21959	ENSMUSG00000032216	Nedd4	neural precursor cell expressed, developmentally down-regulated 4
chr11_31554982_31555482	chr11	31554982	31555482	501	*	-1.4021	2.87619e-05	-0.0264368	Distal Intergenic	11	31665181	31671885	6705	2	69556	116403	ENSMUSG00000044502	Bod1	biorientation of chromosomes in cell division 1
chr4_106912162_106912662	chr4	106912162	106912662	501	*	-1.4021	2.87619e-05	-0.0264368	Promoter (1-2kb)	4	106910701	107049694	138994	1	72475	1461	ENSMUSG00000061887	Ssbp3	single-stranded DNA binding protein 3
chr6_77572584_77573084	chr6	77572584	77573084	501	*	-1.4021	2.87619e-05	-0.0264368	Intron (ENSMUST00000160894.7/12386, intron 8 of 19)	6	77380260	77382459	2200	2	70753	-190125	ENSMUSG00000108077	6330415B21Rik	RIKEN cDNA 6330415B21 gene
chr9_94700446_94700946	chr9	94700446	94700946	501	*	-1.4021	2.87619e-05	-0.0264368	Intron (ENSMUST00000033463.9/331004, intron 2 of 15)	9	94669909	95230445	560537	1	331004	30537	ENSMUSG00000031129	Slc9a9	solute carrier family 9 (sodium/hydrogen exchanger), member 9
chr1_61377024_61377524	chr1	61377024	61377524	501	*	-1.30485	2.88134e-05	-0.0287356	Promoter (<=1kb)	1	61378432	61395904	17473	1	77341	-908	ENSMUSG00000085447	9530026F06Rik	RIKEN cDNA 9530026F06 gene
chr11_20742161_20742661	chr11	20742161	20742661	501	*	-1.14296	2.88134e-05	-0.0333333	Promoter (<=1kb)	11	20685084	20741589	56506	2	216549	-572	ENSMUSG00000049659	Aftph	aftiphilin
chr11_105967382_105967882	chr11	105967382	105967882	501	*	-1.14296	2.88134e-05	-0.0333333	Promoter (<=1kb)	11	105967945	105989964	22020	1	11421	-63	ENSMUSG00000020681	Ace	angiotensin I converting enzyme (peptidyl-dipeptidase A) 1
chr15_100463680_100464180	chr15	100463680	100464180	501	*	-1.14296	2.88134e-05	-0.0333333	Intron (ENSMUST00000180953.1/ENSMUST00000180953.1, intron 1 of 1)	15	100469023	100479164	10142	1	68614	-4843	ENSMUSG00000037353	Letmd1	LETM1 domain containing 1
chr16_5928386_5928886	chr16	5928386	5928886	501	*	-1.30485	2.88134e-05	-0.0287356	Intron (ENSMUST00000230658.1/268859, intron 1 of 11)	16	5885355	7411526	1526172	1	268859	43031	ENSMUSG00000008658	Rbfox1	RNA binding protein, fox-1 homolog (C. elegans) 1
chr19_47356525_47357025	chr19	47356525	47357025	501	*	-1.30485	2.88134e-05	-0.0287356	Intron (ENSMUST00000081619.9/14218, intron 5 of 14)	19	47273519	47273589	71	2	102466782	-82936	ENSMUSG00000098786	Mir6995	microRNA 6995
chr3_58810304_58810804	chr3	58810304	58810804	501	*	-1.14296	2.88134e-05	-0.0333333	Exon (ENSMUST00000212169.1/ENSMUST00000212169.1, exon 2 of 7)	3	58844028	58885340	41313	2	229320	74536	ENSMUSG00000043850	Clrn1	clarin 1
chr6_148354319_148354819	chr6	148354319	148354819	501	*	-1.30485	2.88134e-05	-0.0287356	Promoter (<=1kb)	6	148354656	148355598	943	1	66184	0	ENSMUSG00000063171	Rps4l	ribosomal protein S4-like
chr11_118209188_118209688	chr11	118209188	118209688	501	*	-1.70044	2.91252e-05	-0.0206897	Intron (ENSMUST00000100181.10/19157, intron 1 of 13)	11	118132019	118248592	116574	2	19157	38904	ENSMUSG00000017132	Cyth1	cytohesin 1
chr15_6624519_6625019	chr15	6624519	6625019	501	*	-1.70044	2.91252e-05	-0.0206897	Intron (ENSMUST00000090461.11/23880, intron 2 of 17)	15	6604341	6654303	49963	2	102632231	29284	ENSMUSG00000089647	Gm2245	predicted gene 2245
chr18_35675357_35675857	chr18	35675357	35675857	501	*	-1.70044	2.91252e-05	-0.0206897	Intron (ENSMUST00000025208.6/76594, intron 7 of 7)	18	35656689	35662186	5498	2	71242	-13171	ENSMUSG00000024352	Spata24	spermatogenesis associated 24
chr2_106982453_106982953	chr2	106982453	106982953	501	*	-1.70044	2.91252e-05	-0.0206897	Distal Intergenic	2	106962527	106974424	11898	2	212772	-8029	ENSMUSG00000027122	Arl14ep	ADP-ribosylation factor-like 14 effector protein
chr3_90373352_90373852	chr3	90373352	90373852	501	*	-1.70044	2.91252e-05	-0.0206897	Distal Intergenic	3	90385239	90389938	4700	2	26568	16086	ENSMUSG00000027932	Slc27a3	solute carrier family 27 (fatty acid transporter), member 3
chr4_100028606_100029106	chr4	100028606	100029106	501	*	-1.70044	2.91252e-05	-0.0206897	Distal Intergenic	4	100095791	100444765	348975	1	26563	-66685	ENSMUSG00000035305	Ror1	receptor tyrosine kinase-like orphan receptor 1
chrX_75475278_75475778	chrX	75475278	75475778	501	*	-1.70044	2.91252e-05	-0.0206897	Exon (ENSMUST00000117517.1/ENSMUST00000117517.1, exon 1 of 1)	20	75514299	75534942	20644	1	22327	-38521	ENSMUSG00000031197	Vbp1	von Hippel-Lindau binding protein 1
chr1_5697601_5698101	chr1	5697601	5698101	501	*	2.45943	3.19877e-05	0.0103448	Distal Intergenic	1	5588493	5606131	17639	1	18387	109108	ENSMUSG00000025905	Oprk1	opioid receptor, kappa 1
chr1_86507737_86508237	chr1	86507737	86508237	501	*	-2.45943	3.19877e-05	-0.0103448	Distal Intergenic	1	86526726	86530712	3987	1	19231	-18489	ENSMUSG00000026238	Ptma	prothymosin alpha
chr10_110348633_110349133	chr10	110348633	110349133	501	*	-2.45943	3.19877e-05	-0.0103448	Intron (ENSMUST00000160159.2/260315, intron 1 of 4)	10	109681259	110456204	774946	2	260315	107071	ENSMUSG00000020181	Nav3	neuron navigator 3
chr10_120980636_120981136	chr10	120980636	120981136	501	*	-3.45943	3.19877e-05	-0.0114943	Promoter (1-2kb)	10	120923413	120979332	55920	2	380664	-1304	ENSMUSG00000048661	Lemd3	LEM domain containing 3
chr11_21092379_21092879	chr11	21092379	21092879	501	*	-2.45943	3.19877e-05	-0.0103448	Promoter (1-2kb)	11	21091291	21150323	59033	1	67245	1088	ENSMUSG00000020134	Peli1	pellino 1
chr11_75311643_75312143	chr11	75311643	75312143	501	*	-3.45943	3.19877e-05	-0.0114943	Exon (ENSMUST00000135770.7/68275, exon 12 of 17)	11	75298166	75348324	50159	2	68275	36181	ENSMUSG00000000751	Rpa1	replication protein A1
chr11_97068217_97068717	chr11	97068217	97068717	501	*	-3.45943	3.19877e-05	-0.0114943	3' UTR	11	97063768	97063874	107	1	102465893	4449	ENSMUSG00000098769	Mir8103	microRNA 8103
chr11_109609479_109609979	chr11	109609479	109609979	501	*	-2.45943	3.19877e-05	-0.0103448	Promoter (1-2kb)	11	109573331	109611432	38102	2	52639	1453	ENSMUSG00000041895	Wipi1	WD repeat domain, phosphoinositide interacting 1
chr11_117117743_117118243	chr11	117117743	117118243	501	*	3.45943	3.19877e-05	0.0114943	Promoter (2-3kb)	11	117115168	117159268	44101	1	74136	2575	ENSMUSG00000020823	Sec14l1	SEC14-like lipid binding 1
chr13_35359250_35359750	chr13	35359250	35359750	501	*	-3.45943	3.19877e-05	-0.0114943	Distal Intergenic	13	35184370	35212048	27679	2	75543	-147202	ENSMUSG00000113770	1700019C18Rik	RIKEN cDNA 1700019C18 gene
chr13_41644839_41645339	chr13	41644839	41645339	501	*	-2.45943	3.19877e-05	-0.0103448	Distal Intergenic	13	41605907	41641355	35449	1	621976	38932	ENSMUSG00000087370	Tmem170b	transmembrane protein 170B
chr13_55101532_55102032	chr13	55101532	55102032	501	*	2.45943	3.19877e-05	0.0103448	Promoter (1-2kb)	13	55027880	55100300	72421	2	20184	-1232	ENSMUSG00000025878	Uimc1	ubiquitin interaction motif containing 1
chr13_101749640_101750140	chr13	101749640	101750140	501	*	-2.45943	3.19877e-05	-0.0103448	Exon (ENSMUST00000192073.1/ENSMUST00000192073.1, exon 1 of 1)	13	101680563	101768217	87655	2	18708	18077	ENSMUSG00000041417	Pik3r1	phosphoinositide-3-kinase regulatory subunit 1
chr13_113228000_113228500	chr13	113228000	113228500	501	*	-2.45943	3.19877e-05	-0.0103448	Promoter (2-3kb)	13	113171608	113225908	54301	2	14945	-2092	ENSMUSG00000042385	Gzmk	granzyme K
chr16_8656138_8656638	chr16	8656138	8656638	501	*	-2.45943	3.19877e-05	-0.0103448	3' UTR	16	8658580	8672155	13576	2	52502	15517	ENSMUSG00000008393	Carhsp1	calcium regulated heat stable protein 1
chr16_20804409_20804909	chr16	20804409	20804909	501	*	-1	3.19877e-05	-0.037931	Distal Intergenic	16	20724454	20734511	10058	2	21832	-69898	ENSMUSG00000022847	Thpo	thrombopoietin
chr17_74431455_74431955	chr17	74431455	74431955	501	*	-2.45943	3.19877e-05	-0.0103448	Intron (ENSMUST00000052124.8/268973, intron 8 of 8)	17	74425438	74459142	33705	2	268973	27187	ENSMUSG00000039193	Nlrc4	NLR family, CARD domain containing 4
chr18_12026013_12026513	chr18	12026013	12026513	501	*	3.45943	3.19877e-05	0.0114943	Intron (ENSMUST00000209628.1/338363, intron 8 of 9)	18	11964450	12121537	157088	2	338363	95024	ENSMUSG00000049411	Tmem241	transmembrane protein 241
chr18_55519295_55519795	chr18	55519295	55519795	501	*	-2.45943	3.19877e-05	-0.0103448	Distal Intergenic	18	54888048	54992555	104508	2	269023	-526740	ENSMUSG00000052713	Zfp608	zinc finger protein 608
chr18_61563896_61564396	chr18	61563896	61564396	501	*	2.45943	3.19877e-05	0.0103448	Intron (ENSMUST00000165123.7/93687, intron 2 of 9)	18	61555274	61590061	34788	1	93687	8622	ENSMUSG00000024576	Csnk1a1	casein kinase 1, alpha 1
chr18_75542166_75542666	chr18	75542166	75542666	501	*	2.45943	3.19877e-05	0.0103448	Intron (ENSMUST00000165559.2/269037, intron 7 of 11)	18	75514645	75522806	8162	1	100038353	27521	ENSMUSG00000097712	Gm10532	predicted gene 10532
chr19_28010454_28010954	chr19	28010454	28010954	501	*	-1	3.19877e-05	-0.037931	Promoter (<=1kb)	19	27761721	28011166	249446	2	19726	212	ENSMUSG00000040929	Rfx3	regulatory factor X, 3 (influences HLA class II expression)
chr2_30815335_30815835	chr2	30815335	30815835	501	*	-2.45943	3.19877e-05	-0.0103448	5' UTR	2	30807826	30823033	15208	1	66617	7509	ENSMUSG00000026857	Ntmt1	N-terminal Xaa-Pro-Lys N-methyltransferase 1
chr2_104120795_104121295	chr2	104120795	104121295	501	*	2.45943	3.19877e-05	0.0103448	Promoter (1-2kb)	2	104122769	104124749	1981	1	68243	-1474	ENSMUSG00000032671	A930018P22Rik	RIKEN cDNA A930018P22 gene
chr2_152742398_152742898	chr2	152742398	152742898	501	*	2.45943	3.19877e-05	0.0103448	Distal Intergenic	2	152736251	152737410	1160	1	15901	6147	ENSMUSG00000042745	Id1	inhibitor of DNA binding 1, HLH protein
chr2_155985202_155985702	chr2	155985202	155985702	501	*	2.45943	3.19877e-05	0.0103448	Exon (ENSMUST00000149905.7/16328, exon 22 of 23)	2	155973279	156007977	34699	2	320095	22275	ENSMUSG00000074646	6430550D23Rik	RIKEN cDNA 6430550D23 gene
chr2_164467133_164467633	chr2	164467133	164467633	501	*	2.45943	3.19877e-05	0.0103448	3' UTR	2	164470301	164473724	3424	2	73603	6091	ENSMUSG00000017720	Trp53tg5	transformation related protein 53 target 5
chr3_30595875_30596375	chr3	30595875	30596375	501	*	-3.45943	3.19877e-05	-0.0114943	Downstream (<1kb)	3	30597073	30599939	2867	2	76652	3564	ENSMUSG00000037737	Actrt3	actin related protein T3
chr4_103881368_103881868	chr4	103881368	103881868	501	*	-2.45943	3.19877e-05	-0.0103448	Intron (ENSMUST00000143294.7/13131, intron 1 of 3)	4	103619359	104744844	1125486	1	13131	262009	ENSMUSG00000028519	Dab1	disabled 1
chr4_118139686_118140186	chr4	118139686	118140186	501	*	-2.45943	3.19877e-05	-0.0103448	Intron (ENSMUST00000106406.8/230674, intron 19 of 21)	4	117932154	118134914	202761	2	20441	-4772	ENSMUSG00000028538	St3gal3	ST3 beta-galactoside alpha-2,3-sialyltransferase 3
chr4_129337413_129337913	chr4	129337413	129337913	501	*	2.45943	3.19877e-05	0.0103448	Promoter (1-2kb)	4	129335695	129354547	18853	1	67106	1718	ENSMUSG00000057572	Zbtb8os	zinc finger and BTB domain containing 8 opposite strand
chr4_134352298_134352798	chr4	134352298	134352798	501	*	-2.45943	3.19877e-05	-0.0103448	3' UTR	4	134343181	134354484	11304	1	230810	9117	ENSMUSG00000028836	Slc30a2	solute carrier family 30 (zinc transporter), member 2
chr4_134756413_134756913	chr4	134756413	134756913	501	*	2.45943	3.19877e-05	0.0103448	Intron (ENSMUST00000037828.7/100017, intron 3 of 8)	4	134741554	134768024	26471	2	100017	11111	ENSMUSG00000037295	Ldlrap1	low density lipoprotein receptor adaptor protein 1
chr5_22515692_22516192	chr5	22515692	22516192	501	*	-2.45943	3.19877e-05	-0.0103448	Intron (ENSMUST00000135906.7/26429, intron 11 of 12)	5	22528321	22528719	399	2	100042049	12527	NA	Gm15421	ribosomal protein L22 like 1 pseudogene
chr5_24444330_24444830	chr5	24444330	24444830	501	*	-1	3.19877e-05	-0.037931	Promoter (<=1kb)	5	24438440	24445287	6848	2	66587	457	ENSMUSG00000028959	Fastk	Fas-activated serine/threonine kinase
chr5_44215548_44216048	chr5	44215548	44216048	501	*	2.45943	3.19877e-05	0.0103448	Exon (ENSMUST00000198875.1/ENSMUST00000198875.1, exon 1 of 1)	5	44175154	44226626	51473	2	231225	10578	ENSMUSG00000046985	Tapt1	transmembrane anterior posterior transformation 1
chr5_66765869_66766369	chr5	66765869	66766369	501	*	2.45943	3.19877e-05	0.0103448	Intron (ENSMUST00000201852.3/77569, intron 1 of 7)	5	66745827	67057158	311332	1	77569	20042	ENSMUSG00000037736	Limch1	LIM and calponin homology domains 1
chr5_117753418_117753918	chr5	117753418	117753918	501	*	-2.45943	3.19877e-05	-0.0103448	Intron (ENSMUST00000180430.1/333050, intron 17 of 20)	5	117841850	117958840	116991	1	18125	-87932	ENSMUSG00000029361	Nos1	nitric oxide synthase 1, neuronal
chr5_121744208_121744708	chr5	121744208	121744708	501	*	-2.45943	3.19877e-05	-0.0103448	Exon (ENSMUST00000195919.1/ENSMUST00000195919.1, exon 1 of 1)	5	121711337	121816493	105157	1	20239	32871	ENSMUSG00000042605	Atxn2	ataxin 2
chr5_137761492_137761992	chr5	137761492	137761992	501	*	-2.45943	3.19877e-05	-0.0103448	5' UTR	5	137745730	137768450	22721	1	78829	15762	ENSMUSG00000029723	Tsc22d4	TSC22 domain family, member 4
chr5_140733243_140733743	chr5	140733243	140733743	501	*	-2.45943	3.19877e-05	-0.0103448	Intron (ENSMUST00000060918.10/231842, intron 2 of 7)	5	140724127	140761439	37313	1	231842	9116	ENSMUSG00000050022	Amz1	archaelysin family metallopeptidase 1
chr6_86881391_86881891	chr6	86881391	86881891	501	*	2.45943	3.19877e-05	0.0103448	Intron (ENSMUST00000089519.12/269774, intron 1 of 20)	6	86849517	87003223	153707	1	269774	31874	ENSMUSG00000057230	Aak1	AP2 associated kinase 1
chr6_90465914_90466414	chr6	90465914	90466414	501	*	-2.45943	3.19877e-05	-0.0103448	5' UTR	6	90462576	90475238	12663	1	66277	3338	ENSMUSG00000030087	Klf15	Kruppel-like factor 15
chr6_93770573_93771073	chr6	93770573	93771073	501	*	-2.45943	3.19877e-05	-0.0103448	Intron (ENSMUST00000055224.14/14924, intron 6 of 21)	6	94132923	94283025	150103	2	78178	511952	ENSMUSG00000045095	4930511A08Rik	RIKEN cDNA 4930511A08 gene
chr6_106580411_106580911	chr6	106580411	106580911	501	*	2.45943	3.19877e-05	0.0103448	Intron (ENSMUST00000113261.8/269784, intron 14 of 19)	6	106710357	106749037	38681	2	16192	168126	ENSMUSG00000005364	Il5ra	interleukin 5 receptor, alpha
chr6_108306164_108306664	chr6	108306164	108306664	501	*	-2.45943	3.19877e-05	-0.0103448	Intron (ENSMUST00000032192.8/16438, intron 4 of 61)	6	108213096	108551109	338014	1	16438	93068	ENSMUSG00000030102	Itpr1	inositol 1,4,5-trisphosphate receptor 1
chr6_108664452_108664952	chr6	108664452	108664952	501	*	-2.45943	3.19877e-05	-0.0103448	Exon (ENSMUST00000032194.10/20893, exon 5 of 5)	6	108577039	108660934	83896	2	75394	-3518	ENSMUSG00000087341	0610040F04Rik	RIKEN cDNA 0610040F04 gene
chr6_111161794_111162294	chr6	111161794	111162294	501	*	-2.45943	3.19877e-05	-0.0103448	Intron (ENSMUST00000174018.7/108073, intron 5 of 9)	6	110645581	111567230	921650	1	108073	516213	ENSMUSG00000056755	Grm7	glutamate receptor, metabotropic 7
chr6_126549616_126550116	chr6	126549616	126550116	501	*	-2.45943	3.19877e-05	-0.0103448	Exon (ENSMUST00000210335.1/ENSMUST00000210335.1, exon 5 of 5)	6	126532551	126535412	2862	2	16493	-14204	ENSMUSG00000045534	Kcna5	potassium voltage-gated channel, shaker-related subfamily, member 5
chr7_25416360_25416860	chr7	25416360	25416860	501	*	-2.45943	3.19877e-05	-0.0103448	Intron (ENSMUST00000206436.1/654804, intron 4 of 5)	7	25400053	25412886	12834	2	232983	-3474	ENSMUSG00000060188	Cxcl17	chemokine (C-X-C motif) ligand 17
chr7_28743632_28744132	chr7	28743632	28744132	501	*	-2.45943	3.19877e-05	-0.0103448	Promoter (1-2kb)	7	28741992	28753871	11880	1	71984	1640	ENSMUSG00000070699	Sars2	seryl-aminoacyl-tRNA synthetase 2
chr7_30453502_30454002	chr7	30453502	30454002	501	*	-3.45943	3.19877e-05	-0.0114943	Exon (ENSMUST00000140565.1/243911, exon 8 of 13)	7	30447534	30457652	10119	2	243911	3650	ENSMUSG00000036915	Kirrel2	kirre like nephrin family adhesion molecule 2
chr7_31089724_31090224	chr7	31089724	31090224	501	*	3.45943	3.19877e-05	0.0114943	Distal Intergenic	7	31068172	31076704	8533	2	17178	-13020	ENSMUSG00000057092	Fxyd3	FXYD domain-containing ion transport regulator 3
chr7_80296537_80297037	chr7	80296537	80297037	501	*	-2.45943	3.19877e-05	-0.0103448	Promoter (2-3kb)	7	80294450	80316259	21810	1	233406	2087	ENSMUSG00000038943	Prc1	protein regulator of cytokinesis 1
chr7_112170230_112170730	chr7	112170230	112170730	501	*	-2.45943	3.19877e-05	-0.0103448	Distal Intergenic	7	112116017	112159057	43041	2	50781	-11173	ENSMUSG00000030772	Dkk3	dickkopf WNT signaling pathway inhibitor 3
chr7_141384818_141385318	chr7	141384818	141385318	501	*	-2.45943	3.19877e-05	-0.0103448	Distal Intergenic	7	141392199	141402968	10770	1	21351	-6881	ENSMUSG00000025503	Taldo1	transaldolase 1
chr8_126828027_126828527	chr8	126828027	126828527	501	*	-2.45943	3.19877e-05	-0.0103448	Intron (ENSMUST00000212406.1/ENSMUST00000212406.1, intron 4 of 8)	8	126839233	126851473	12241	1	414091	-10706	NA	A630001O12Rik	RIKEN cDNA A630001O12 gene
chr9_44714322_44714822	chr9	44714322	44714822	501	*	-3.45943	3.19877e-05	-0.0114943	Intron (ENSMUST00000147495.7/102693, intron 5 of 21)	9	44686304	44735198	48895	2	102693	20376	ENSMUSG00000048537	Phldb1	pleckstrin homology like domain, family B, member 1
chr9_56906916_56907416	chr9	56906916	56907416	501	*	-2.45943	3.19877e-05	-0.0103448	Distal Intergenic	9	56917193	56928371	11179	2	235406	20955	ENSMUSG00000032733	Snx33	sorting nexin 33
chr9_77986516_77987016	chr9	77986516	77987016	501	*	-3.45943	3.19877e-05	-0.0114943	Distal Intergenic	9	78051924	78065624	13701	1	14531	-64908	ENSMUSG00000023333	Gcm1	glial cells missing homolog 1
chr9_94968993_94969493	chr9	94968993	94969493	501	*	2.45943	3.19877e-05	0.0103448	Intron (ENSMUST00000033463.9/331004, intron 9 of 15)	9	94751829	94751890	62	1	102465763	217164	ENSMUSG00000098251	Mir7656	microRNA 7656
chr9_102616153_102616653	chr9	102616153	102616653	501	*	-3.45943	3.19877e-05	-0.0114943	Intron (ENSMUST00000162655.8/28135, intron 3 of 12)	9	102626296	102634425	8130	1	69010	-9643	ENSMUSG00000035048	Anapc13	anaphase promoting complex subunit 13
chr9_110459037_110459537	chr9	110459037	110459537	501	*	-2.45943	3.19877e-05	-0.0103448	Intron (ENSMUST00000068025.12/270201, intron 1 of 9)	9	110425926	110476694	50769	2	270201	17157	ENSMUSG00000054792	Klhl18	kelch-like 18
chrX_12794802_12795302	chrX	12794802	12795302	501	*	-2.45943	3.19877e-05	-0.0103448	Intron (ENSMUST00000139163.7/552913, intron 2 of 4)	20	12762278	12821492	59215	1	552913	32524	ENSMUSG00000085891	Gm14634	predicted gene 14634
chrX_68839750_68840250	chrX	68839750	68840250	501	*	-2.45943	3.19877e-05	-0.0103448	Distal Intergenic	20	68892375	68893053	679	2	627927	52803	ENSMUSG00000056815	Gm6812	predicted gene 6812
chr12_78918182_78918682	chr12	78918182	78918682	501	*	-1.24393	3.24461e-05	-0.0298851	Distal Intergenic	12	78888691	78906964	18274	2	27260	-11218	ENSMUSG00000021118	Plek2	pleckstrin 2
chr4_151361969_151362469	chr4	151361969	151362469	501	*	-1.24393	3.24461e-05	-0.0298851	Intron (ENSMUST00000169423.8/100072, intron 5 of 24)	4	151089570	151091449	1880	1	105704528	272399	ENSMUSG00000078491	Gm13090	predicted gene 13090
chr8_109917250_109917750	chr8	109917250	109917750	501	*	-1.24393	3.24461e-05	-0.0298851	Intron (ENSMUST00000179721.7/244650, intron 9 of 18)	8	109947914	109962203	14290	2	73608	44453	ENSMUSG00000001672	Marveld3	MARVEL (membrane-associating) domain containing 3
chr1_91055109_91055609	chr1	91055109	91055609	501	*	2.08746	3.31517e-05	0.0149425	Intron (ENSMUST00000189505.6/16978, intron 1 of 12)	1	90998737	91128944	130208	1	16978	56372	ENSMUSG00000026305	Lrrfip1	leucine rich repeat (in FLII) interacting protein 1
chr10_128089378_128089878	chr10	128089378	128089878	501	*	-2.08746	3.31517e-05	-0.0149425	Promoter (1-2kb)	10	128091577	128129303	37727	1	116848	-1699	ENSMUSG00000040054	Baz2a	bromodomain adjacent to zinc finger domain, 2A
chr11_115779201_115779701	chr11	115779201	115779701	501	*	-2.08746	3.31517e-05	-0.0149425	Intron (ENSMUST00000093912.10/71947, intron 2 of 31)	11	115765433	115799366	33934	1	71947	13768	ENSMUSG00000020747	Tmem94	transmembrane protein 94
chr13_31939257_31939757	chr13	31939257	31939757	501	*	2.08746	3.31517e-05	0.0149425	Intron (ENSMUST00000041859.8/218138, intron 8 of 10)	13	31806633	31812476	5844	1	17300	132624	ENSMUSG00000050295	Foxc1	forkhead box C1
chr15_13175907_13176407	chr15	13175907	13176407	501	*	-2.08746	3.31517e-05	-0.0149425	Promoter (2-3kb)	15	13028701	13173675	144975	2	12563	-2232	ENSMUSG00000039385	Cdh6	cadherin 6
chr16_33481081_33481581	chr16	33481081	33481581	501	*	-2.08746	3.31517e-05	-0.0149425	Intron (ENSMUST00000165418.8/22661, intron 7 of 8)	16	33517328	33664135	146808	1	171286	-35747	ENSMUSG00000035506	Slc12a8	solute carrier family 12 (potassium/chloride transporters), member 8
chr19_23794176_23794676	chr19	23794176	23794676	501	*	-2.08746	3.31517e-05	-0.0149425	Intron (ENSMUST00000025830.8/319924, intron 1 of 12)	19	23758887	23949596	190710	1	319924	35289	ENSMUSG00000024897	Apba1	amyloid beta (A4) precursor protein binding, family A, member 1
chr19_40501352_40501852	chr19	40501352	40501852	501	*	-2.08746	3.31517e-05	-0.0149425	5' UTR	19	40294753	40513779	219027	2	20411	11927	ENSMUSG00000025006	Sorbs1	sorbin and SH3 domain containing 1
chr2_142760778_142761278	chr2	142760778	142761278	501	*	-2.08746	3.31517e-05	-0.0149425	Intron (ENSMUST00000230763.1/16558, intron 12 of 26)	2	142617474	142901531	284058	2	16558	140253	ENSMUSG00000038844	Kif16b	kinesin family member 16B
chr3_146880278_146880778	chr3	146880278	146880778	501	*	-2.08746	3.31517e-05	-0.0149425	Intron (ENSMUST00000038090.11/70892, intron 1 of 14)	3	146852367	146984009	131643	1	70892	27911	ENSMUSG00000036745	Ttll7	tubulin tyrosine ligase-like family, member 7
chr4_45612067_45612567	chr4	45612067	45612567	501	*	-2.08746	3.31517e-05	-0.0149425	Distal Intergenic	4	45639744	45646111	6368	1	100040557	-27177	ENSMUSG00000085980	Gm12408	predicted gene 12408
chr5_75799996_75800496	chr5	75799996	75800496	501	*	-2.08746	3.31517e-05	-0.0149425	Distal Intergenic	5	75932827	75978458	45632	2	16542	177962	ENSMUSG00000062960	Kdr	kinase insert domain protein receptor
chr7_27264196_27264696	chr7	27264196	27264696	501	*	-2.08746	3.31517e-05	-0.0149425	Exon (ENSMUST00000149805.7/18223, exon 1 of 8)	7	27258433	27282144	23712	1	18223	5763	ENSMUSG00000063160	Numbl	numb-like
chr7_44484173_44484673	chr7	44484173	44484673	501	*	-2.08746	3.31517e-05	-0.0149425	Exon (ENSMUST00000206342.1/71368, exon 1 of 2)	7	44473538	44486138	12601	1	71368	10635	ENSMUSG00000108322	5430431A17Rik	RIKEN cDNA 5430431A17 gene
chr7_49152634_49153134	chr7	49152634	49153134	501	*	-2.08746	3.31517e-05	-0.0149425	Intron (ENSMUST00000183659.7/78286, intron 2 of 39)	7	49122334	49159819	37486	2	108167511	6685	NA	9130015G15Rik	RIKEN cDNA 9130015G15 gene
chr8_121382396_121382896	chr8	121382396	121382896	501	*	-2.08746	3.31517e-05	-0.0149425	Intron (ENSMUST00000127664.1/108148, intron 1 of 15)	8	121530780	121544320	13541	2	76405	161424	ENSMUSG00000031809	1700018B08Rik	RIKEN cDNA 1700018B08 gene
chr9_64494623_64495123	chr9	64494623	64495123	501	*	-2.08746	3.31517e-05	-0.0149425	Intron (ENSMUST00000093829.8/214058, intron 1 of 22)	9	64385626	64709205	323580	1	214058	108997	ENSMUSG00000036466	Megf11	multiple EGF-like-domains 11
chr16_85317630_85318130	chr16	85317630	85318130	501	*	-1.02308	3.38632e-05	-0.0367816	Distal Intergenic	16	84949685	85173766	224082	2	11820	-143864	ENSMUSG00000022892	App	amyloid beta (A4) precursor protein
chr17_27527928_27528428	chr17	27527928	27528428	501	*	-1.02308	3.38632e-05	-0.0367816	Distal Intergenic	17	27422387	27521403	99017	2	268934	-6525	ENSMUSG00000063239	Grm4	glutamate receptor, metabotropic 4
chr11_57787875_57788375	chr11	57787875	57788375	501	*	-1.42884	3.40756e-05	-0.0252874	Distal Intergenic	11	57795499	57801417	5919	2	76516	13042	ENSMUSG00000087165	2010001A14Rik	RIKEN cDNA 2010001A14 gene
chr15_19276416_19276916	chr15	19276416	19276916	501	*	-1.42884	3.40756e-05	-0.0252874	Distal Intergenic	15	19185373	19203329	17957	1	102639102	91043	ENSMUSG00000115803	Gm35496	predicted gene, 35496
chr18_24635964_24636464	chr18	24635964	24636464	501	*	-1.42884	3.40756e-05	-0.0252874	Intron (ENSMUST00000234266.1/58523, intron 21 of 21)	18	24653691	24701575	47885	1	68591	-17227	ENSMUSG00000039616	Mocos	molybdenum cofactor sulfurase
chr4_109173671_109174171	chr4	109173671	109174171	501	*	-1.42884	3.40756e-05	-0.0252874	Intron (ENSMUST00000194478.5/100273, intron 1 of 23)	4	109061145	109202272	141128	2	100273	28101	ENSMUSG00000028559	Osbpl9	oxysterol binding protein-like 9
chr7_55986568_55987068	chr7	55986568	55987068	501	*	-1.42884	3.40756e-05	-0.0252874	Intron (ENSMUST00000052204.5/233280, intron 3 of 4)	7	55962531	55980868	18338	1	320845	24037	NA	A230056P14Rik	RIKEN cDNA A230056P14 gene
chr17_4997207_4997707	chr17	4997207	4997707	501	*	-1.19265	3.56966e-05	-0.0310345	Promoter (2-3kb)	17	4994332	5347656	353325	1	239985	2875	ENSMUSG00000069729	Arid1b	AT rich interactive domain 1B (SWI-like)
chr18_50828151_50828651	chr18	50828151	50828651	501	*	-1.19265	3.56966e-05	-0.0310345	Distal Intergenic	18	50567656	50568724	1069	2	67365	-259427	ENSMUSG00000048875	Pudp	pseudouridine 5'-phosphatase
chr19_24264927_24265427	chr19	24264927	24265427	501	*	-1.19265	3.56966e-05	-0.0310345	Intron (ENSMUST00000081333.10/14297, intron 4 of 4)	19	24261453	24280605	19153	2	14297	15178	ENSMUSG00000059363	Fxn	frataxin
chr18_35918547_35919047	chr18	35918547	35919047	501	*	-1.04891	3.582e-05	-0.0356322	Distal Intergenic	18	35964830	36014715	49886	1	74002	-45783	ENSMUSG00000024347	Psd2	pleckstrin and Sec7 domain containing 2
chr2_146745731_146746231	chr2	146745731	146746231	501	*	-1.04891	3.582e-05	-0.0356322	Distal Intergenic	2	146855864	146970097	114234	1	228730	-109633	ENSMUSG00000074749	Kiz	kizuna centrosomal protein
chr4_56829606_56830106	chr4	56829606	56830106	501	*	-1.32193	3.582e-05	-0.0275862	Exon (ENSMUST00000045142.14/54366, exon 9 of 19)	4	56802345	56809601	7257	1	230234	27261	ENSMUSG00000038827	Abitram	actin binding transcription modulator
chr4_57275042_57275542	chr4	57275042	57275542	501	*	-1.04891	3.582e-05	-0.0356322	Intron (ENSMUST00000075637.10/545622, intron 1 of 25)	4	57190841	57301837	110997	2	545622	26295	ENSMUSG00000038764	Ptpn3	protein tyrosine phosphatase, non-receptor type 3
chr4_154986060_154986560	chr4	154986060	154986560	501	*	-1.04891	3.582e-05	-0.0356322	3' UTR	4	154964123	154980938	16816	1	269614	21937	ENSMUSG00000029056	Pank4	pantothenate kinase 4
chr5_34370126_34370626	chr5	34370126	34370626	501	*	-1.32193	3.582e-05	-0.0275862	Promoter (<=1kb)	5	34369933	34486456	116524	1	231128	193	ENSMUSG00000037210	Fam193a	family with sequence homology 193, member A
chr5_96373256_96373756	chr5	96373256	96373756	501	*	-1.32193	3.582e-05	-0.0275862	Promoter (<=1kb)	5	96373955	96784728	410774	1	231470	-199	ENSMUSG00000034687	Fras1	Fraser extracellular matrix complex subunit 1
chr11_96735824_96736324	chr11	96735824	96736324	501	*	-1.078	3.75471e-05	-0.0344828	Intron (ENSMUST00000103154.10/78473, intron 11 of 12)	11	96767555	96777559	10005	2	74479	41235	ENSMUSG00000020876	Snx11	sorting nexin 11
chr5_115954909_115955409	chr5	115954909	115955409	501	*	-1.078	3.75471e-05	-0.0344828	Intron (ENSMUST00000141101.4/12704, intron 21 of 45)	5	116013586	116024508	10923	2	19079	69099	ENSMUSG00000029513	Prkab1	protein kinase, AMP-activated, beta 1 non-catalytic subunit
chr12_8297810_8298310	chr12	8297810	8298310	501	*	-1.14886	3.75591e-05	-0.0321839	3' UTR	12	8297918	8301954	4037	2	238057	3644	ENSMUSG00000037660	Gdf7	growth differentiation factor 7
chr13_34652025_34652525	chr13	34652025	34652525	501	*	-1.14886	3.75591e-05	-0.0321839	Promoter (<=1kb)	13	34652923	34666774	13852	1	101056149	-398	ENSMUSG00000086786	Gm15908	predicted gene 15908
chr3_153658310_153658810	chr3	153658310	153658810	501	*	-1.14886	3.75591e-05	-0.0321839	Intron (ENSMUST00000200397.4/20447, intron 1 of 4)	3	153198266	153725174	526909	2	20447	66364	ENSMUSG00000052544	St6galnac3	ST6 (alpha-N-acetyl-neuraminyl-2,3-beta-galactosyl-1,3)-N-acetylgalactosaminide alpha-2,6-sialyltransferase 3
chr1_184965539_184966039	chr1	184965539	184966039	501	*	-1.11103	3.80713e-05	-0.0333333	Intron (ENSMUST00000027929.9/226778, intron 1 of 17)	1	184896789	184999570	102782	2	226778	33531	ENSMUSG00000026620	Mark1	MAP/microtubule affinity regulating kinase 1
chr4_69195472_69195972	chr4	69195472	69195972	501	*	-1.11103	3.80713e-05	-0.0333333	Distal Intergenic	4	68761514	68954397	192884	2	56710	-241075	ENSMUSG00000028351	Brinp1	bone morphogenic protein/retinoic acid inducible neural specific 1
chr4_106606848_106607348	chr4	106606848	106607348	501	*	-1.11103	3.80713e-05	-0.0333333	Exon (ENSMUST00000126324.6/242602, exon 1 of 3)	4	106590909	106617241	26333	2	242602	9893	ENSMUSG00000054362	Lexm	lymphocyte expansion molecule
chr6_122297375_122297875	chr6	122297375	122297875	501	*	-1.11103	3.80713e-05	-0.0333333	Distal Intergenic	6	122308720	122317680	8961	1	17113	-10845	ENSMUSG00000007458	M6pr	mannose-6-phosphate receptor, cation dependent
chr8_120413143_120413643	chr8	120413143	120413643	501	*	-1.11103	3.80713e-05	-0.0333333	Intron (ENSMUST00000127664.1/108148, intron 1 of 15)	8	120536892	120537726	835	2	74227	124083	ENSMUSG00000102737	1700016A09Rik	RIKEN cDNA 1700016A09 gene
chr1_186392960_186393460	chr1	186392960	186393460	501	*	-1.45943	4.30224e-05	-0.0241379	Distal Intergenic	1	186511838	186558681	46844	2	320449	165221	ENSMUSG00000103690	A730004F24Rik	RIKEN cDNA A730004F24 gene
chr11_87985433_87985933	chr11	87985433	87985933	501	*	-1.45943	4.30224e-05	-0.0241379	Promoter (1-2kb)	11	87979525	87987533	8009	2	68097	1600	ENSMUSG00000020483	Dynll2	dynein light chain LC8-type 2
chr1_89576174_89576674	chr1	89576174	89576674	501	*	-1.25634	4.40517e-05	-0.0287356	Exon (ENSMUST00000191576.1/ENSMUST00000191576.1, exon 3 of 3)	1	89650529	89683908	33380	2	74403	107234	NA	4933400F21Rik	RIKEN cDNA 4933400F21 gene
chr1_167929956_167930456	chr1	167929956	167930456	501	*	-1.25634	4.40517e-05	-0.0287356	Distal Intergenic	1	167689237	167848741	159505	1	110648	240719	ENSMUSG00000026686	Lmx1a	LIM homeobox transcription factor 1 alpha
chr17_36825942_36826442	chr17	36825942	36826442	501	*	-1.25634	4.40517e-05	-0.0287356	Distal Intergenic	17	36837134	36859398	22265	1	22670	-10692	ENSMUSG00000024457	Trim26	tripartite motif-containing 26
chr7_45509412_45509912	chr7	45509412	45509912	501	*	-1.25634	4.40517e-05	-0.0287356	Promoter (<=1kb)	7	45490458	45510406	19949	2	18220	494	ENSMUSG00000030824	Nucb1	nucleobindin 1
chr7_75848596_75849096	chr7	75848596	75849096	501	*	-1.25634	4.40517e-05	-0.0287356	Promoter (<=1kb)	7	75848310	75874131	25822	1	207952	286	ENSMUSG00000055652	Klhl25	kelch-like 25
chr3_8767529_8768029	chr3	8767529	8768029	501	*	-1	4.44773e-05	-0.0367816	Distal Intergenic	3	8663359	8667256	3898	2	15213	-100273	ENSMUSG00000040289	Hey1	hairy/enhancer-of-split related with YRPW motif 1
chr15_53785314_53785814	chr15	53785314	53785814	501	*	-1.34104	4.82345e-05	-0.0264368	Intron (ENSMUST00000078673.13/320679, intron 2 of 4)	15	53453810	53902537	448728	2	320679	116723	ENSMUSG00000058656	Samd12	sterile alpha motif domain containing 12
chr4_43957144_43957644	chr4	43957144	43957644	501	*	-1.34104	4.82345e-05	-0.0264368	Promoter (<=1kb)	4	43957401	43979118	21718	1	384009	0	ENSMUSG00000028480	Glipr2	GLI pathogenesis-related 2
chr5_64702909_64703409	chr5	64702909	64703409	501	*	-1.34104	4.82345e-05	-0.0264368	Distal Intergenic	5	64593857	64610700	16844	2	100042198	-92209	ENSMUSG00000105402	Gm3716	predicted gene 3716
chr8_3627963_3628463	chr8	3627963	3628463	501	*	-1.34104	4.82345e-05	-0.0264368	Promoter (2-3kb)	8	3623371	3625545	2175	2	18545	-2418	ENSMUSG00000004630	Pcp2	Purkinje cell protein 2 (L7)
chr8_76127424_76127924	chr8	76127424	76127924	501	*	-1.34104	4.82345e-05	-0.0264368	Intron (ENSMUST00000212103.1/ENSMUST00000212103.1, intron 1 of 9)	8	75448694	75984503	535810	1	71831	678730	ENSMUSG00000031620	Iqcm	IQ motif containing M
chr8_80879641_80880141	chr8	80879641	80880141	501	*	-1.34104	4.82345e-05	-0.0264368	Promoter (<=1kb)	8	80764438	80880519	116082	2	14388	378	ENSMUSG00000031714	Gab1	growth factor receptor bound protein 2-associated protein 1
chr9_45412237_45412737	chr9	45412237	45412737	501	*	-1.34104	4.82345e-05	-0.0264368	Distal Intergenic	9	45399669	45410278	10610	1	11936	12568	ENSMUSG00000059412	Fxyd2	FXYD domain-containing ion transport regulator 2
chr14_34234944_34235444	chr14	34234944	34235444	501	*	-1.02385	4.8486e-05	-0.0356322	Downstream (1-2kb)	14	34219595	34230420	10826	1	319508	15349	ENSMUSG00000041479	Syt15	synaptotagmin XV
chr15_103340770_103341270	chr15	103340770	103341270	501	*	-1.02385	4.8486e-05	-0.0356322	Promoter (<=1kb)	15	103313895	103340093	26199	2	29813	-677	ENSMUSG00000000552	Zfp385a	zinc finger protein 385A
chr17_85023479_85023979	chr17	85023479	85023979	501	*	-1.20163	4.99034e-05	-0.0298851	3' UTR	17	85028376	85064236	35861	1	20532	-4397	ENSMUSG00000024131	Slc3a1	solute carrier family 3, member 1
chr5_147959044_147959544	chr5	147959044	147959544	501	*	-1.20163	4.99034e-05	-0.0298851	Promoter (1-2kb)	5	147957320	148316065	358746	1	77521	1724	ENSMUSG00000029651	Mtus2	microtubule associated tumor suppressor candidate 2
chr1_77183879_77184379	chr1	77183879	77184379	501	*	-2.22239	5.03125e-05	-0.0126437	Distal Intergenic	1	77496653	77496768	116	2	102465180	312389	ENSMUSG00000099141	Mir6352	microRNA 6352
chr10_80100175_80100675	chr10	80100175	80100675	501	*	-2.22239	5.03125e-05	-0.0126437	Intron (ENSMUST00000219260.1/216161, intron 2 of 32)	10	80056992	80105571	48580	2	216161	4896	ENSMUSG00000035673	Sbno2	strawberry notch 2
chr10_80837427_80837927	chr10	80837427	80837927	501	*	-2.22239	5.03125e-05	-0.0126437	Intron (ENSMUST00000053986.8/237403, intron 1 of 1)	10	80832801	80844039	11239	2	237403	6112	ENSMUSG00000051067	Lingo3	leucine rich repeat and Ig domain containing 3
chr10_126678374_126678874	chr10	126678374	126678874	501	*	2.22239	5.03125e-05	0.0126437	Distal Intergenic	10	126710282	126710391	110	2	102465224	31517	ENSMUSG00000098756	Mir378d	microRNA 378d
chr11_77794152_77794652	chr11	77794152	77794652	501	*	-2.22239	5.03125e-05	-0.0126437	Intron (ENSMUST00000108375.8/360013, intron 2 of 41)	11	77763246	77865980	102735	1	360013	30906	ENSMUSG00000000631	Myo18a	myosin XVIIIA
chr11_107319726_107320226	chr11	107319726	107320226	501	*	-2.22239	5.03125e-05	-0.0126437	Intron (ENSMUST00000040380.12/71795, intron 3 of 7)	11	107166663	107189381	22719	2	68979	-130345	ENSMUSG00000018433	Nol11	nucleolar protein 11
chr11_119156353_119156853	chr11	119156353	119156853	501	*	-2.22239	5.03125e-05	-0.0126437	Promoter (2-3kb)	11	119154076	119154137	62	2	102465563	-2216	ENSMUSG00000098704	Mir6934	microRNA 6934
chr11_119389031_119389531	chr11	119389031	119389531	501	*	2.22239	5.03125e-05	0.0126437	Promoter (<=1kb)	11	119390472	119390561	90	1	100316690	-941	ENSMUSG00000088015	Mir1932	microRNA 1932
chr11_120486927_120487427	chr11	120486927	120487427	501	*	-2.22239	5.03125e-05	-0.0126437	Promoter (2-3kb)	11	120484613	120489065	4453	1	56282	2314	ENSMUSG00000039640	Mrpl12	mitochondrial ribosomal protein L12
chr11_120994773_120995273	chr11	120994773	120995273	501	*	-2.22239	5.03125e-05	-0.0126437	Distal Intergenic	11	120958990	120991330	32341	2	104318	-3443	ENSMUSG00000025162	Csnk1d	casein kinase 1, delta
chr14_32537948_32538448	chr14	32537948	32538448	501	*	-2.22239	5.03125e-05	-0.0126437	Intron (ENSMUST00000066807.7/319955, intron 5 of 20)	14	32513521	32580990	67470	1	319955	24427	ENSMUSG00000054051	Ercc6	excision repair cross-complementing rodent repair deficiency, complementation group 6
chr14_51103255_51103755	chr14	51103255	51103755	501	*	-2.22239	5.03125e-05	-0.0126437	Intron (ENSMUST00000022428.12/58809, intron 1 of 1)	14	51114426	51117807	3382	1	219026	-10671	ENSMUSG00000072575	Eddm3b	epididymal protein 3B
chr15_80875642_80876142	chr15	80875642	80876142	501	*	-2.22239	5.03125e-05	-0.0126437	Intron (ENSMUST00000067689.8/213988, intron 6 of 24)	15	80940039	80940120	82	1	100628612	-63897	ENSMUSG00000092868	Mir5113	microRNA 5113
chr17_5993075_5993575	chr17	5993075	5993575	501	*	-2.22239	5.03125e-05	-0.0126437	Intron (ENSMUST00000115791.9/20975, intron 4 of 26)	17	5941280	6044290	103011	1	20975	51795	ENSMUSG00000023805	Synj2	synaptojanin 2
chr18_75380264_75380764	chr18	75380264	75380764	501	*	-2.22239	5.03125e-05	-0.0126437	Intron (ENSMUST00000026999.9/17131, intron 3 of 3)	18	75367529	75395935	28407	1	17131	12735	ENSMUSG00000025880	Smad7	SMAD family member 7
chr2_135863340_135863840	chr2	135863340	135863840	501	*	2.22239	5.03125e-05	0.0126437	Intron (ENSMUST00000146018.7/18798, intron 2 of 2)	2	136052239	136069917	17679	1	76161	-188399	ENSMUSG00000027270	Lamp5	lysosomal-associated membrane protein family, member 5
chr2_152689688_152690188	chr2	152689688	152690188	501	*	-2.22239	5.03125e-05	-0.0126437	Promoter (2-3kb)	2	152687035	152687946	912	1	66405	2653	ENSMUSG00000042814	Mcts2	malignant T cell amplified sequence 2
chr4_105203386_105203886	chr4	105203386	105203886	501	*	-2.22239	5.03125e-05	-0.0126437	Intron (ENSMUST00000064139.7/67916, intron 2 of 5)	4	105157347	105232764	75418	1	67916	46039	ENSMUSG00000028517	Plpp3	phospholipid phosphatase 3
chr4_109065039_109065539	chr4	109065039	109065539	501	*	2.22239	5.03125e-05	0.0126437	Intron (ENSMUST00000084366.12/100273, intron 17 of 20)	4	109017655	109017730	76	1	791075	47384	ENSMUSG00000076444	Mir761	microRNA 761
chr4_116219981_116220481	chr4	116219981	116220481	501	*	-2.22239	5.03125e-05	-0.0126437	Intron (ENSMUST00000216692.1/18710, intron 1 of 9)	4	116173384	116303056	129673	1	18710	46597	ENSMUSG00000028698	Pik3r3	phosphoinositide-3-kinase regulatory subunit 3
chr4_119539919_119540419	chr4	119539919	119540419	501	*	-1.05063	5.03125e-05	-0.0344828	Promoter (<=1kb)	4	119530308	119539529	9222	2	433752	-390	ENSMUSG00000087385	Frg2f1	FSHD region gene 2 family member 1
chr4_140635284_140635784	chr4	140635284	140635784	501	*	-2.22239	5.03125e-05	-0.0126437	Intron (ENSMUST00000039204.9/72754, intron 1 of 27)	4	140514485	140666012	151528	2	72754	30228	ENSMUSG00000040964	Arhgef10l	Rho guanine nucleotide exchange factor (GEF) 10-like
chr5_36929350_36929850	chr5	36929350	36929850	501	*	2.22239	5.03125e-05	0.0126437	Intron (ENSMUST00000031003.10/269643, intron 4 of 8)	5	36873595	36876879	3285	2	71054	-52471	ENSMUSG00000087487	Ppp2r2cos	protein phosphatase 2, regulatory subunit B, gamma, opposite strand
chr5_70826437_70826937	chr5	70826437	70826937	501	*	-2.22239	5.03125e-05	-0.0126437	Intron (ENSMUST00000031119.5/14405, intron 1 of 8)	5	70751047	70842617	91571	2	14405	15680	ENSMUSG00000001260	Gabrg1	gamma-aminobutyric acid (GABA) A receptor, subunit gamma 1
chr5_73148042_73148542	chr5	73148042	73148542	501	*	-2.22239	5.03125e-05	-0.0126437	5' UTR	5	73019987	73256619	236633	2	72313	108077	ENSMUSG00000070733	Fryl	FRY like transcription coactivator
chr5_115336462_115336962	chr5	115336462	115336962	501	*	2.22239	5.03125e-05	0.0126437	Intron (ENSMUST00000139167.2/384281, intron 1 of 2)	5	115333239	115341178	7940	2	384281	4216	ENSMUSG00000029536	Gatc	glutamyl-tRNA(Gln) amidotransferase, subunit C
chr5_123391411_123391911	chr5	123391411	123391911	501	*	-1.05063	5.03125e-05	-0.0344828	Promoter (2-3kb)	5	123394798	123457932	63135	1	208104	-2887	ENSMUSG00000038342	Mlxip	MLX interacting protein
chr6_37212263_37212763	chr6	37212263	37212763	501	*	-2.22239	5.03125e-05	-0.0126437	Intron (ENSMUST00000101532.9/320127, intron 1 of 33)	6	36846022	37300184	454163	2	320127	87421	ENSMUSG00000038665	Dgki	diacylglycerol kinase, iota
chr7_73393558_73394058	chr7	73393558	73394058	501	*	-2.22239	5.03125e-05	-0.0126437	Intron (ENSMUST00000119206.2/244058, intron 1 of 2)	7	73314003	73375774	61772	2	319783	-17784	ENSMUSG00000097756	A730056A06Rik	RIKEN cDNA A730056A06 gene
chr8_40627005_40627505	chr8	40627005	40627505	501	*	-1.05063	5.03125e-05	-0.0344828	Intron (ENSMUST00000048890.16/54384, intron 1 of 14)	8	40551095	40634797	83703	2	54384	7292	ENSMUSG00000039431	Mtmr7	myotubularin related protein 7
chr8_126637919_126638419	chr8	126637919	126638419	501	*	2.22239	5.03125e-05	0.0126437	Distal Intergenic	8	126588296	126593986	5691	2	270110	-43933	ENSMUSG00000051495	Irf2bp2	interferon regulatory factor 2 binding protein 2
chr9_44126718_44127218	chr9	44126718	44127218	501	*	-2.22239	5.03125e-05	-0.0126437	Intron (ENSMUST00000180670.2/100038560, intron 1 of 1)	9	44134469	44142727	8259	1	84004	-7251	ENSMUSG00000032135	Mcam	melanoma cell adhesion molecule
chr9_95769779_95770279	chr9	95769779	95770279	501	*	-2.22239	5.03125e-05	-0.0126437	Intron (ENSMUST00000093800.8/102502, intron 10 of 15)	9	95705082	95750358	45277	2	22063	-19421	ENSMUSG00000032839	Trpc1	transient receptor potential cation channel, subfamily C, member 1
chr9_107556638_107557138	chr9	107556638	107557138	501	*	-2.22239	5.03125e-05	-0.0126437	Exon (ENSMUST00000121635.6/56289, exon 1 of 5)	9	107551555	107562267	10713	1	56289	5083	ENSMUSG00000010067	Rassf1	Ras association (RalGDS/AF-6) domain family member 1
chr9_120001788_120002288	chr9	120001788	120002288	501	*	-2.22239	5.03125e-05	-0.0126437	Intron (ENSMUST00000177637.1/13051, intron 2 of 2)	9	119971163	119984658	13496	2	215418	-17130	ENSMUSG00000032515	Csrnp1	cysteine-serine-rich nuclear protein 1
chr1_43828292_43828792	chr1	43828292	43828792	501	*	-1.49476	5.07624e-05	-0.0229885	Promoter (<=1kb)	1	43746966	43827800	80835	2	67883	-492	ENSMUSG00000057363	Uxs1	UDP-glucuronate decarboxylase 1
chr10_91166791_91167291	chr10	91166791	91167291	501	*	-1.49476	5.07624e-05	-0.0229885	Intron (ENSMUST00000072239.13/21917, intron 1 of 8)	10	91147571	91181315	33745	2	21917	14024	ENSMUSG00000019961	Tmpo	thymopoietin
chr12_81915479_81915979	chr12	81915479	81915979	501	*	-1.49476	5.07624e-05	-0.0229885	Intron (ENSMUST00000221721.1/54604, intron 5 of 35)	12	81860023	82000924	140902	1	54604	55456	ENSMUSG00000021140	Pcnx	pecanex homolog
chr14_25816315_25816815	chr14	25816315	25816815	501	*	-1.49476	5.07624e-05	-0.0229885	Distal Intergenic	14	25842156	25886804	44649	1	11744	-25341	ENSMUSG00000021866	Anxa11	annexin A11
chr15_26875642_26876142	chr15	26875642	26876142	501	*	-1.49476	5.07624e-05	-0.0229885	Intron (ENSMUST00000059204.10/448987, intron 1 of 3)	15	26540459	26895580	355122	2	448987	19438	ENSMUSG00000043556	Fbxl7	F-box and leucine-rich repeat protein 7
chr3_32417309_32417809	chr3	32417309	32417809	501	*	-1.49476	5.07624e-05	-0.0229885	Intron (ENSMUST00000108243.7/18706, intron 1 of 20)	3	32397671	32468486	70816	1	18706	19638	ENSMUSG00000027665	Pik3ca	phosphatidylinositol-4,5-bisphosphate 3-kinase catalytic subunit alpha
chr4_117829420_117829920	chr4	117829420	117829920	501	*	-1.49476	5.07624e-05	-0.0229885	Distal Intergenic	4	117834506	117875196	40691	1	14664	-4586	ENSMUSG00000028542	Slc6a9	solute carrier family 6 (neurotransmitter transporter, glycine), member 9
chr5_111660304_111660804	chr5	111660304	111660804	501	*	-1.49476	5.07624e-05	-0.0229885	Distal Intergenic	5	111581422	111604932	23511	1	330164	78882	ENSMUSG00000052848	C130026L21Rik	RIKEN cDNA C130026L21 gene
chr6_84269412_84269912	chr6	84269412	84269912	501	*	-1.49476	5.07624e-05	-0.0229885	Intron (ENSMUST00000203565.1/ENSMUST00000203565.1, intron 1 of 1)	6	84412942	84423838	10897	2	100038556	153926	ENSMUSG00000107797	Gm10445	predicted gene 10445
chr7_139015702_139016202	chr7	139015702	139016202	501	*	-1.49476	5.07624e-05	-0.0229885	Intron (ENSMUST00000106111.7/74004, intron 3 of 9)	7	139086001	139102704	16704	1	26757	-69799	ENSMUSG00000025478	Dpysl4	dihydropyrimidinase-like 4
chr8_36306168_36306668	chr8	36306168	36306668	501	*	-1.49476	5.07624e-05	-0.0229885	Distal Intergenic	8	36216064	36249516	33453	2	244421	-56652	ENSMUSG00000039633	Lonrf1	LON peptidase N-terminal domain and ring finger 1
chr9_21029388_21029888	chr9	21029388	21029888	501	*	-1.49476	5.07624e-05	-0.0229885	Promoter (<=1kb)	9	21029373	21030595	1223	1	78369	15	ENSMUSG00000001014	Icam4	intercellular adhesion molecule 4, Landsteiner-Wiener blood group
chr15_102107922_102108422	chr15	102107922	102108422	501	*	-1.15528	5.11009e-05	-0.0310345	Exon (ENSMUST00000228958.1/209039, exon 9 of 29)	15	102100413	102116401	15989	1	209039	7509	ENSMUSG00000037003	Tns2	tensin 2
chr5_118266261_118266761	chr5	118266261	118266761	501	*	-1.15528	5.11009e-05	-0.0310345	Exon (ENSMUST00000104098.2/ENSMUST00000104098.2, exon 1 of 1)	5	118245227	118266093	20867	1	76792	21034	ENSMUSG00000032840	Spring1	SREBF pathway regulator in golgi 1
chr8_124347070_124347570	chr8	124347070	124347570	501	*	-1.15528	5.11009e-05	-0.0310345	Distal Intergenic	8	124369049	124439658	70610	2	209966	92088	ENSMUSG00000050751	Pgbd5	piggyBac transposable element derived 5
chr13_55011822_55012322	chr13	55011822	55012322	501	*	-1.08092	5.14124e-05	-0.0333333	3' UTR	13	55005985	55021385	15401	2	212032	9063	ENSMUSG00000025877	Hk3	hexokinase 3
chr2_156620926_156621426	chr2	156620926	156621426	501	*	-1.08092	5.14124e-05	-0.0333333	Intron (ENSMUST00000109567.9/228836, intron 1 of 12)	2	156613705	156764363	150659	1	228836	7221	ENSMUSG00000061689	Dlgap4	DLG associated protein 4
chr4_155043163_155043663	chr4	155043163	155043663	501	*	-1.08092	5.14124e-05	-0.0333333	Exon (ENSMUST00000097750.2/ENSMUST00000097750.2, exon 2 of 2)	4	154983115	155056784	73670	2	269615	13121	ENSMUSG00000029055	Plch2	phospholipase C, eta 2
chr5_135940624_135941124	chr5	135940624	135941124	501	*	-1.08092	5.14124e-05	-0.0333333	Distal Intergenic	5	135908409	135934616	26208	2	22628	-6008	ENSMUSG00000051391	Ywhag	tyrosine 3-monooxygenase/tryptophan 5-monooxygenase activation protein, gamma polypeptide
chr8_108536180_108536680	chr8	108536180	108536680	501	*	-1.08092	5.14124e-05	-0.0333333	Exon (ENSMUST00000210837.1/ENSMUST00000210837.1, exon 1 of 2)	8	108553252	108584595	31344	2	109215	47915	ENSMUSG00000110613	Lncbate1	brown adipose tissue enriched long non-coding RNA 1
chr1_168308926_168309426	chr1	168308926	168309426	501	*	-1.11548	5.19541e-05	-0.0321839	Intron (ENSMUST00000188912.6/18514, intron 2 of 7)	1	168119364	168432270	312907	2	18514	122844	ENSMUSG00000052534	Pbx1	pre B cell leukemia homeobox 1
chr4_111628955_111629455	chr4	111628955	111629455	501	*	-1.11548	5.19541e-05	-0.0321839	Intron (ENSMUST00000106592.7/78933, intron 11 of 12)	4	111719984	111829184	109201	1	67946	-90529	ENSMUSG00000034401	Spata6	spermatogenesis associated 6
chr6_128662234_128662734	chr6	128662234	128662734	501	*	-1.11548	5.19541e-05	-0.0321839	Promoter (<=1kb)	6	128662385	128677374	14990	1	94071	0	ENSMUSG00000030364	Clec2h	C-type lectin domain family 2, member h
chr7_125576899_125577399	chr7	125576899	125577399	501	*	-1.11548	5.19541e-05	-0.0321839	3' UTR	7	125552120	125579474	27355	1	16190	24779	ENSMUSG00000030748	Il4ra	interleukin 4 receptor, alpha
chr9_50501184_50501684	chr9	50501184	50501684	501	*	-1.11548	5.19541e-05	-0.0321839	Intron (ENSMUST00000114474.7/76509, intron 3 of 3)	9	50488795	50507823	19029	2	69631	6139	ENSMUSG00000101304	Plet1os	placenta expressed transcript 1, opposite strand
chrX_71601245_71601745	chrX	71601245	71601745	501	*	-1.11548	5.19541e-05	-0.0321839	Distal Intergenic	20	71555918	71560676	4759	1	15354	45327	ENSMUSG00000015217	Hmgb3	high mobility group box 3
chr1_75370310_75370810	chr1	75370310	75370810	501	*	-1.926	5.45835e-05	-0.016092	Exon (ENSMUST00000130095.1/100503248, exon 1 of 3)	1	75368212	75375012	6801	2	100503248	4202	ENSMUSG00000085653	Gm15179	predicted gene 15179
chr10_94838655_94839155	chr10	94838655	94839155	501	*	-1.926	5.45835e-05	-0.016092	Intron (ENSMUST00000099337.4/54712, intron 15 of 30)	10	94790866	94944835	153970	2	54712	105680	ENSMUSG00000074785	Plxnc1	plexin C1
chr11_108890490_108890990	chr11	108890490	108890990	501	*	-1.926	5.45835e-05	-0.016092	Distal Intergenic	11	108920349	108950783	30435	1	12006	-29359	ENSMUSG00000000142	Axin2	axin 2
chr11_120006475_120006975	chr11	120006475	120006975	501	*	1.926	5.45835e-05	0.016092	3' UTR	11	120014767	120014853	87	1	100526518	-7792	ENSMUSG00000105524	Mir3065	microRNA 3065
chr12_38130161_38130661	chr12	38130161	38130661	501	*	-1.926	5.45835e-05	-0.016092	Intron (ENSMUST00000221176.1/217480, intron 9 of 9)	12	37817726	38634239	816514	1	217480	312435	ENSMUSG00000036095	Dgkb	diacylglycerol kinase, beta
chr12_71875567_71876067	chr12	71875567	71876067	501	*	-1.926	5.45835e-05	-0.016092	Intron (ENSMUST00000223272.1/208846, intron 1 of 25)	12	71831078	71992333	161256	1	208846	44489	ENSMUSG00000034574	Daam1	dishevelled associated activator of morphogenesis 1
chr14_30544297_30544797	chr14	30544297	30544797	501	*	-1.926	5.45835e-05	-0.016092	Distal Intergenic	14	30549131	30574720	25590	1	21881	-4334	ENSMUSG00000021957	Tkt	transketolase
chr17_13669233_13669733	chr17	13669233	13669733	501	*	-1.926	5.45835e-05	-0.016092	Intron (ENSMUST00000135850.7/72578, intron 1 of 4)	17	13760539	13906150	145612	1	17356	-90806	ENSMUSG00000068036	Afdn	afadin, adherens junction formation factor
chr17_25539517_25540017	chr17	25539517	25540017	501	*	-1.926	5.45835e-05	-0.016092	Distal Intergenic	17	25518585	25522565	3981	1	102636737	20932	ENSMUSG00000117437	Gm33727	predicted gene, 33727
chr18_54997795_54998295	chr18	54997795	54998295	501	*	-1.926	5.45835e-05	-0.016092	Intron (ENSMUST00000181538.1/ENSMUST00000181538.1, intron 1 of 4)	18	54888048	54992555	104508	2	269023	-5240	ENSMUSG00000052713	Zfp608	zinc finger protein 608
chr2_30649194_30649694	chr2	30649194	30649694	501	*	-1.926	5.45835e-05	-0.016092	Intron (ENSMUST00000146702.1/ENSMUST00000146702.1, intron 2 of 3)	2	30658468	30678011	19544	2	665635	28317	NA	Gm14486	predicted gene 14486
chr2_103923849_103924349	chr2	103923849	103924349	501	*	-1.926	5.45835e-05	-0.016092	Distal Intergenic	2	103957986	103981878	23893	1	16909	-33637	ENSMUSG00000032698	Lmo2	LIM domain only 2
chr5_74297073_74297573	chr5	74297073	74297573	501	*	-1.926	5.45835e-05	-0.016092	Intron (ENSMUST00000072857.12/212986, intron 5 of 8)	5	74195286	74199481	4196	1	68939	101787	ENSMUSG00000049907	Rasl11b	RAS-like, family 11, member B
chr5_136967914_136968414	chr5	136967914	136968414	501	*	-1.926	5.45835e-05	-0.016092	Promoter (1-2kb)	5	136966616	136975858	9243	1	60363	1298	ENSMUSG00000001739	Cldn15	claudin 15
chr5_146420025_146420525	chr5	146420025	146420525	501	*	-1.926	5.45835e-05	-0.016092	Intron (ENSMUST00000016143.8/245880, intron 1 of 9)	5	146384985	146473615	88631	1	245880	35040	ENSMUSG00000029636	Wasf3	WASP family, member 3
chr6_39415692_39416192	chr6	39415692	39416192	501	*	-1.926	5.45835e-05	-0.016092	Intron (ENSMUST00000114823.7/54484, intron 1 of 7)	6	39419887	39421294	1408	1	621427	-3695	ENSMUSG00000068601	Gm10244	predicted gene 10244
chr8_26105034_26105534	chr8	26105034	26105534	501	*	-1.926	5.45835e-05	-0.016092	Intron (ENSMUST00000037182.13/320191, intron 2 of 21)	8	26021421	26119224	97804	2	320191	13690	ENSMUSG00000037234	Hook3	hook microtubule tethering protein 3
chr8_122818961_122819461	chr8	122818961	122819461	501	*	-1.926	5.45835e-05	-0.016092	Intron (ENSMUST00000127664.1/108148, intron 1 of 15)	8	122847966	122867397	19432	1	12555	-28505	ENSMUSG00000031962	Cdh15	cadherin 15
chr9_4415933_4416433	chr9	4415933	4416433	501	*	-1.926	5.45835e-05	-0.016092	Downstream (1-2kb)	9	4376562	4386870	10309	1	78100	39371	ENSMUSG00000041124	Msantd4	Myb/SANT-like DNA-binding domain containing 4 with coiled-coils
chrX_7657163_7657663	chrX	7657163	7657663	501	*	-1.926	5.45835e-05	-0.016092	Promoter (<=1kb)	20	7657260	7668186	10927	1	54630	0	ENSMUSG00000031145	Prickle3	prickle planar cell polarity protein 3
chrX_9128364_9128864	chrX	9128364	9128864	501	*	-1.926	5.45835e-05	-0.016092	Distal Intergenic	20	9104562	9106342	1781	1	75775	23802	ENSMUSG00000045797	4930402K13Rik	RIKEN cDNA 4930402K13 gene
chr1_136550827_136551327	chr1	136550827	136551327	501	*	-1.27009	5.65909e-05	-0.0275862	Intron (ENSMUST00000194018.1/ENSMUST00000194018.1, intron 3 of 4)	1	136624901	136630053	5153	1	226442	-73574	ENSMUSG00000041483	Zfp281	zinc finger protein 281
chr16_41258272_41258772	chr16	41258272	41258772	501	*	-1.27009	5.65909e-05	-0.0275862	Intron (ENSMUST00000187695.6/268890, intron 2 of 8)	16	42303362	42303469	108	2	102466172	1044697	ENSMUSG00000098300	Mir6540	microRNA 6540
chr18_39066882_39067382	chr18	39066882	39067382	501	*	-1.27009	5.65909e-05	-0.0275862	Intron (ENSMUST00000148850.7/71302, intron 2 of 5)	18	38838673	38929472	90800	2	14164	-137410	ENSMUSG00000036585	Fgf1	fibroblast growth factor 1
chr18_56097193_56097693	chr18	56097193	56097693	501	*	-1.27009	5.65909e-05	-0.0275862	Distal Intergenic	18	56400337	56503792	103456	1	107022	-302644	ENSMUSG00000001700	Gramd3	GRAM domain containing 3
chr4_120969662_120970162	chr4	120969662	120970162	501	*	-1.27009	5.65909e-05	-0.0275862	Exon (ENSMUST00000043200.7/69780, exon 10 of 10)	4	120973259	120973322	64	2	102465614	3160	ENSMUSG00000106436	Mir7015	microRNA 7015
chr5_146410731_146411231	chr5	146410731	146411231	501	*	-1.27009	5.65909e-05	-0.0275862	Intron (ENSMUST00000016143.8/245880, intron 1 of 9)	5	146384985	146473615	88631	1	245880	25746	ENSMUSG00000029636	Wasf3	WASP family, member 3
chr7_79535949_79536449	chr7	79535949	79536449	501	*	-1.27009	5.65909e-05	-0.0275862	Exon (ENSMUST00000206829.1/ENSMUST00000206829.1, exon 1 of 2)	7	79505264	79505353	90	1	723968	30685	ENSMUSG00000093238	Mir9-3	microRNA 9-3
chr8_122811773_122812273	chr8	122811773	122812273	501	*	-1.27009	5.65909e-05	-0.0275862	Intron (ENSMUST00000127664.1/108148, intron 1 of 15)	8	122847966	122867397	19432	1	12555	-35693	ENSMUSG00000031962	Cdh15	cadherin 15
chr1_80756729_80757229	chr1	80756729	80757229	501	*	-1.53605	5.91521e-05	-0.0218391	Promoter (1-2kb)	1	80501073	80758527	257455	2	210293	1298	ENSMUSG00000038608	Dock10	dedicator of cytokinesis 10
chr1_85703479_85703979	chr1	85703479	85703979	501	*	-1.36257	5.91521e-05	-0.0252874	Exon (ENSMUST00000141709.1/20684, exon 1 of 5)	1	85751948	85752074	127	1	102466882	-47969	ENSMUSG00000098634	Mir8096	microRNA 8096
chr12_58964566_58965066	chr12	58964566	58965066	501	*	-1.36257	5.91521e-05	-0.0252874	Exon (ENSMUST00000180738.2/ENSMUST00000180738.2, exon 2 of 2)	12	58958383	59012017	53635	2	20334	46951	ENSMUSG00000020986	Sec23a	SEC23 homolog A, COPII coat complex component
chr12_112679386_112679886	chr12	112679386	112679886	501	*	-1.36257	5.91521e-05	-0.0252874	Promoter (<=1kb)	12	112678828	112682747	3920	1	382639	558	ENSMUSG00000037638	Zbtb42	zinc finger and BTB domain containing 42
chr13_57685115_57685615	chr13	57685115	57685615	501	*	-1.36257	5.91521e-05	-0.0252874	Intron (ENSMUST00000187852.6/20745, intron 3 of 9)	13	57421195	57908332	487138	2	20745	222717	ENSMUSG00000056222	Spock1	sparc/osteonectin, cwcv and kazal-like domains proteoglycan 1
chr15_79025302_79025802	chr15	79025302	79025802	501	*	-1.36257	5.91521e-05	-0.0252874	Promoter (<=1kb)	15	79015329	79025782	10454	2	654469	0	NA	Gm17753	predicted gene, 17753
chr15_80216073_80216573	chr15	80216073	80216573	501	*	-1.53605	5.91521e-05	-0.0218391	Distal Intergenic	15	80234018	80253371	19354	1	239555	-17445	ENSMUSG00000022412	Mief1	mitochondrial elongation factor 1
chr17_29459440_29459940	chr17	29459440	29459940	501	*	-1.53605	5.91521e-05	-0.0218391	Intron (ENSMUST00000234231.1/ENSMUST00000234231.1, intron 1 of 3)	17	29490753	29496112	5360	1	18712	-30813	ENSMUSG00000024014	Pim1	proviral integration site 1
chr18_37755493_37755993	chr18	37755493	37755993	501	*	-1.53605	5.91521e-05	-0.0218391	Promoter (<=1kb)	18	37755731	37841873	86143	1	93723	0	ENSMUSG00000102742	Pcdhga11	protocadherin gamma subfamily A, 11
chr2_5090347_5090847	chr2	5090347	5090847	501	*	-1.36257	5.91521e-05	-0.0252874	Distal Intergenic	2	5020642	5064051	43410	2	71648	-26296	ENSMUSG00000026672	Optn	optineurin
chr2_158273693_158274193	chr2	158273693	158274193	501	*	-1.53605	5.91521e-05	-0.0218391	Intron (ENSMUST00000109499.7/329547, intron 9 of 14)	2	158258094	158284531	26438	1	329547	15599	ENSMUSG00000052922	Bpi	bactericidal permeablility increasing protein
chr5_120102712_120103212	chr5	120102712	120103212	501	*	-1.36257	5.91521e-05	-0.0252874	Distal Intergenic	5	120116465	120198981	82517	1	74111	-13253	ENSMUSG00000029594	Rbm19	RNA binding motif protein 19
chr5_140663836_140664336	chr5	140663836	140664336	501	*	-1.53605	5.91521e-05	-0.0218391	3' UTR	5	140620578	140649031	28454	2	78339	-14805	ENSMUSG00000036565	Ttyh3	tweety family member 3
chr6_12117314_12117814	chr6	12117314	12117814	501	*	-1.36257	5.91521e-05	-0.0252874	Distal Intergenic	6	12099518	12109583	10066	2	625347	-7731	ENSMUSG00000057223	Gm6578	mitochondrial ribosomal protein L32 pseudogene
chr6_124492802_124493302	chr6	124492802	124493302	501	*	-1.36257	5.91521e-05	-0.0252874	Promoter (<=1kb)	6	124493113	124510643	17531	1	232371	0	ENSMUSG00000038527	C1rl	complement component 1, r subcomponent-like
chr7_45632460_45632960	chr7	45632460	45632960	501	*	-1.53605	5.91521e-05	-0.0218391	Exon (ENSMUST00000057927.9/69903, exon 5 of 12)	7	45627488	45639093	11606	1	69903	4972	ENSMUSG00000044562	Rasip1	Ras interacting protein 1
chr10_79554883_79555383	chr10	79554883	79555383	501	*	-1	5.93826e-05	-0.0356322	Promoter (<=1kb)	10	79540245	79555199	14955	2	70427	0	ENSMUSG00000042570	Mier2	MIER family member 2
chr11_3288605_3289105	chr11	3288605	3289105	501	*	-1	5.93826e-05	-0.0356322	Promoter (<=1kb)	11	3288874	3309083	20210	1	56218	0	ENSMUSG00000020453	Patz1	POZ (BTB) and AT hook containing zinc finger 1
chr11_59302717_59303217	chr11	59302717	59303217	501	*	-1.2115	6.48696e-05	-0.0287356	Distal Intergenic	11	59306928	59333552	26625	1	216795	-3711	ENSMUSG00000000126	Wnt9a	wingless-type MMTV integration site family, member 9A
chr5_120953919_120954419	chr5	120953919	120954419	501	*	1.2115	6.48696e-05	0.0287356	Exon (ENSMUST00000079204.8/19894, exon 13 of 22)	5	120914536	120921652	7117	1	100535	39383	ENSMUSG00000032623	Oas1d	2'-5' oligoadenylate synthetase 1D
chr15_102955007_102955507	chr15	102955007	102955507	501	*	-1.58496	6.83846e-05	-0.0206897	Promoter (<=1kb)	15	102954427	102957708	3282	1	109663	580	ENSMUSG00000001656	Hoxc11	homeobox C11
chr17_28518823_28519323	chr17	28518823	28519323	501	*	-1.58496	6.83846e-05	-0.0206897	Promoter (1-2kb)	17	28399094	28517524	118431	2	14229	-1299	ENSMUSG00000024222	Fkbp5	FK506 binding protein 5
chr17_68769509_68770009	chr17	68769509	68770009	501	*	-1.58496	6.83846e-05	-0.0206897	Intron (ENSMUST00000093007.5/320858, intron 18 of 19)	17	68826623	68843139	16517	1	622645	-56614	ENSMUSG00000095407	Tmem200c	transmembrane protein 200C
chr19_4611817_4612317	chr19	4611817	4612317	501	*	-1.58496	6.83846e-05	-0.0206897	3' UTR	19	4611785	4615667	3883	2	225875	3350	ENSMUSG00000045045	Lrfn4	leucine rich repeat and fibronectin type III domain containing 4
chr2_153298377_153298877	chr2	153298377	153298877	501	*	-1.58496	6.83846e-05	-0.0206897	Intron (ENSMUST00000028977.6/16569, intron 1 of 8)	2	153291413	153333390	41978	1	16569	6964	ENSMUSG00000027475	Kif3b	kinesin family member 3B
chr2_163787668_163788168	chr2	163787668	163788168	501	*	-1.58496	6.83846e-05	-0.0206897	Distal Intergenic	2	163820861	163833146	12286	1	22403	-32693	ENSMUSG00000027656	Ccn5	cellular communication network factor 5
chr3_50443323_50443823	chr3	50443323	50443823	501	*	-1.58496	6.83846e-05	-0.0206897	Promoter (<=1kb)	3	49892526	50443614	551089	2	26570	0	ENSMUSG00000027737	Slc7a11	solute carrier family 7 (cationic amino acid transporter, y+ system), member 11
chr5_91352623_91353123	chr5	91352623	91353123	501	*	-1.58496	6.83846e-05	-0.0206897	Distal Intergenic	5	91357261	91402994	45734	2	12223	49871	ENSMUSG00000082361	Btc	betacellulin, epidermal growth factor family member
chr1_42869954_42870454	chr1	42869954	42870454	501	*	-1.80735	6.90249e-05	-0.0172414	Intron (ENSMUST00000057208.12/69527, intron 2 of 10)	1	42851233	42905683	54451	1	69527	18721	ENSMUSG00000060679	Mrps9	mitochondrial ribosomal protein S9
chr1_185546182_185546682	chr1	185546182	185546682	501	*	-1.80735	6.90249e-05	-0.0172414	Distal Intergenic	1	185497388	185498017	630	1	114668	48794	ENSMUSG00000102185	5033404E19Rik	NSA2 ribosome biogenesis homolog pseudogene
chr10_70318593_70319093	chr10	70318593	70319093	501	*	-1.05247	6.90249e-05	-0.0333333	Distal Intergenic	10	70245100	70285968	40869	1	66859	73493	ENSMUSG00000037762	Slc16a9	solute carrier family 16 (monocarboxylic acid transporters), member 9
chr10_79955719_79956219	chr10	79955719	79956219	501	*	-1.80735	6.90249e-05	-0.0172414	Distal Intergenic	10	79960152	79970203	10052	1	216156	-3933	ENSMUSG00000035754	Wdr18	WD repeat domain 18
chr10_81388682_81389182	chr10	81388682	81389182	501	*	-1.80735	6.90249e-05	-0.0172414	Promoter (2-3kb)	10	81386347	81386412	66	1	102466763	2335	ENSMUSG00000098811	Mir6913	microRNA 6913
chr10_81424646_81425146	chr10	81424646	81425146	501	*	-1.16227	6.90249e-05	-0.0298851	Intron (ENSMUST00000105321.9/18029, intron 1 of 8)	10	81416240	81416297	58	2	102465778	-8349	ENSMUSG00000105379	Mir1191b	microRNA 1191b
chr11_22632970_22633470	chr11	22632970	22633470	501	*	-1.80735	6.90249e-05	-0.0172414	Distal Intergenic	11	22512088	22519234	7147	1	103765	120882	ENSMUSG00000049904	Tmem17	transmembrane protein 17
chr11_69629718_69630218	chr11	69629718	69630218	501	*	-1.80735	6.90249e-05	-0.0172414	Promoter (2-3kb)	11	69632990	69653297	20308	1	23879	-2772	ENSMUSG00000018765	Fxr2	fragile X mental retardation, autosomal homolog 2
chr11_97691549_97692049	chr11	97691549	97692049	501	*	1.80735	6.90249e-05	0.0172414	5' UTR	11	97685826	97688621	2796	1	217149	5723	ENSMUSG00000078695	Cisd3	CDGSH iron sulfur domain 3
chr11_116885168_116885668	chr11	116885168	116885668	501	*	-1.16227	6.90249e-05	-0.0298851	Distal Intergenic	11	116849901	116853094	3194	2	20382	-32074	ENSMUSG00000034120	Srsf2	serine and arginine-rich splicing factor 2
chr14_33205355_33205855	chr14	33205355	33205855	501	*	-1.80735	6.90249e-05	-0.0172414	Distal Intergenic	14	33214026	33369934	155909	1	239027	-8171	ENSMUSG00000063506	Arhgap22	Rho GTPase activating protein 22
chr16_10570643_10571143	chr16	10570643	10571143	501	*	1.80735	6.90249e-05	0.0172414	Intron (ENSMUST00000115824.9/74374, intron 4 of 23)	16	10545339	10744878	199540	1	74374	25304	ENSMUSG00000068663	Clec16a	C-type lectin domain family 16, member A
chr16_89831163_89831663	chr16	89831163	89831663	501	*	-1.80735	6.90249e-05	-0.0172414	Intron (ENSMUST00000114122.7/21844, intron 6 of 18)	16	89570176	89571183	1008	2	16693	-259980	ENSMUSG00000091212	Krtap11-1	keratin associated protein 11-1
chr17_24180760_24181260	chr17	24180760	24181260	501	*	-1.80735	6.90249e-05	-0.0172414	3' UTR	17	24163866	24169702	5837	2	11984	-11058	ENSMUSG00000024121	Atp6v0c	ATPase, H+ transporting, lysosomal V0 subunit C
chr18_7702486_7702986	chr18	7702486	7702986	501	*	-1.80735	6.90249e-05	-0.0172414	Distal Intergenic	18	7347959	7626866	278908	2	75739	-75620	ENSMUSG00000057440	Mpp7	membrane protein, palmitoylated 7 (MAGUK p55 subfamily member 7)
chr18_65669166_65669666	chr18	65669166	65669666	501	*	-1.80735	6.90249e-05	-0.0172414	Intron (ENSMUST00000235822.1/328977, intron 8 of 10)	18	65698268	65751601	53334	1	319888	-28602	ENSMUSG00000046610	Oacyl	O-acyltransferase like
chr2_158748556_158749056	chr2	158748556	158749056	501	*	-1.80735	6.90249e-05	-0.0172414	Intron (ENSMUST00000129902.1/228852, intron 5 of 10)	2	158768093	158786637	18545	1	71878	-19037	ENSMUSG00000027654	Fam83d	family with sequence similarity 83, member D
chr3_87971626_87972126	chr3	87971626	87972126	501	*	-1.80735	6.90249e-05	-0.0172414	Promoter (<=1kb)	3	87971078	87980451	9374	1	18008	548	ENSMUSG00000004891	Nes	nestin
chr4_82934232_82934732	chr4	82934232	82934732	501	*	-1.80735	6.90249e-05	-0.0172414	Intron (ENSMUST00000170248.8/329872, intron 27 of 36)	4	82881751	82885148	3398	2	12622	-49084	ENSMUSG00000038192	Cer1	cerberus 1, DAN family BMP antagonist
chr4_93995800_93996300	chr4	93995800	93996300	501	*	-1.80735	6.90249e-05	-0.0172414	Distal Intergenic	4	94500081	94556796	56716	2	67770	560496	ENSMUSG00000028578	Caap1	caspase activity and apoptosis inhibitor 1
chr6_83392073_83392573	chr6	83392073	83392573	501	*	-1.80735	6.90249e-05	-0.0172414	Intron (ENSMUST00000089622.10/194388, intron 3 of 10)	6	83400996	83401102	107	2	102465194	8529	ENSMUSG00000099045	Mir6374	microRNA 6374
chr7_82175072_82175572	chr7	82175072	82175572	501	*	-1.16227	6.90249e-05	-0.0298851	Promoter (1-2kb)	7	82173840	82307419	133580	1	20408	1232	ENSMUSG00000030638	Sh3gl3	SH3-domain GRB2-like 3
chr7_114292561_114293061	chr7	114292561	114293061	501	*	1.80735	6.90249e-05	0.0172414	Distal Intergenic	7	114264606	114276118	11513	2	26440	-16443	ENSMUSG00000030751	Psma1	proteasome subunit alpha 1
chr8_117290287_117290787	chr8	117290287	117290787	501	*	-1.80735	6.90249e-05	-0.0172414	Intron (ENSMUST00000166750.8/74440, intron 1 of 20)	8	117257064	117459430	202367	1	74440	33223	ENSMUSG00000034390	Cmip	c-Maf inducing protein
chr9_72955529_72956029	chr9	72955529	72956029	501	*	-1.80735	6.90249e-05	-0.0172414	Promoter (2-3kb)	9	72958785	72973064	14280	1	67685	-2756	ENSMUSG00000092192	Dnaaf4	dynein axonemal assembly factor 4
chr2_151962534_151963034	chr2	151962534	151963034	501	*	-1.08406	7.01018e-05	-0.0321839	Distal Intergenic	2	151967529	151967617	89	2	100316704	4583	ENSMUSG00000088491	Mir1953	microRNA 1953
chr3_130180575_130181075	chr3	130180575	130181075	501	*	-1.08406	7.01018e-05	-0.0321839	5' UTR	3	130131501	130599877	468377	1	77018	49074	ENSMUSG00000058897	Col25a1	collagen, type XXV, alpha 1
chr5_74126438_74126938	chr5	74126438	74126938	501	*	-1.08406	7.01018e-05	-0.0321839	Distal Intergenic	5	74093530	74093650	121	1	100313943	32908	ENSMUSG00000093355	Snora26	small nucleolar RNA, H/ACA box 26
chr7_75642294_75642794	chr7	75642294	75642794	501	*	-1.08406	7.01018e-05	-0.0321839	Intron (ENSMUST00000166315.6/75547, intron 8 of 36)	7	75455534	75754609	299076	1	75547	186760	ENSMUSG00000066406	Akap13	A kinase (PRKA) anchor protein 13
chr11_72205839_72206339	chr11	72205839	72206339	501	*	-1.12029	7.02739e-05	-0.0310345	Promoter (1-2kb)	11	72153929	72207459	53531	2	74477	1120	ENSMUSG00000020807	4933427D14Rik	RIKEN cDNA 4933427D14 gene
chr15_27659536_27660036	chr15	27659536	27660036	501	*	-1.12029	7.02739e-05	-0.0310345	3' UTR	15	27655069	27681579	26511	2	223433	21543	ENSMUSG00000056069	Otulinl	OTU deubiquitinase with linear linkage specificity like
chr4_110225445_110225945	chr4	110225445	110225945	501	*	-1.12029	7.02739e-05	-0.0310345	Exon (ENSMUST00000144554.1/15572, exon 4 of 4)	4	110203722	110351909	148188	2	15572	125964	ENSMUSG00000028546	Elavl4	ELAV like RNA binding protein 4
chr4_126778959_126779459	chr4	126778959	126779459	501	*	-1.12029	7.02739e-05	-0.0310345	Intron (ENSMUST00000148935.7/100317, intron 2 of 2)	4	126753544	126870070	116527	1	100317	25415	ENSMUSG00000028830	AU040320	expressed sequence AU040320
chr9_77276630_77277130	chr9	77276630	77277130	501	*	-1.12029	7.02739e-05	-0.0310345	Intron (ENSMUST00000185144.7/69642, intron 1 of 10)	9	77102081	77347916	245836	2	69642	70786	ENSMUSG00000032355	Mlip	muscular LMNA-interacting protein
chr11_36589588_36590088	chr11	36589588	36590088	501	*	-1.64386	7.287e-05	-0.0195402	Intron (ENSMUST00000102801.7/23964, intron 4 of 30)	11	35838400	35980527	142128	2	211652	-609061	ENSMUSG00000018849	Wwc1	WW, C2 and coiled-coil domain containing 1
chr4_128073563_128074063	chr4	128073563	128074063	501	*	-1.64386	7.287e-05	-0.0195402	Intron (ENSMUST00000129619.7/329942, intron 2 of 12)	4	127987857	128567656	579800	1	329942	85706	ENSMUSG00000028804	Csmd2	CUB and Sushi multiple domains 2
chr6_145041044_145041544	chr6	145041044	145041544	501	*	-1.64386	7.287e-05	-0.0195402	Intron (ENSMUST00000032402.11/12035, intron 2 of 10)	6	144993835	145076184	82350	2	12035	34640	ENSMUSG00000030268	Bcat1	branched chain aminotransferase 1, cytosolic
chr7_44458276_44458776	chr7	44458276	44458776	501	*	-1.64386	7.287e-05	-0.0195402	Intron (ENSMUST00000127790.7/272381, intron 2 of 2)	7	44465391	44467758	2368	1	68352	-6615	ENSMUSG00000038704	Aspdh	aspartate dehydrogenase domain containing
chr8_25544783_25545283	chr8	25544783	25545283	501	*	-1.64386	7.287e-05	-0.0195402	Intron (ENSMUST00000155564.7/14182, intron 3 of 3)	8	25548661	25556083	7423	2	102633315	10800	ENSMUSG00000086134	Gm16159	predicted gene 16159
chr8_71316330_71316830	chr8	71316330	71316830	501	*	-1.64386	7.287e-05	-0.0195402	Intron (ENSMUST00000212935.1/17925, intron 3 of 39)	8	71248561	71272934	24374	2	76478	-43396	ENSMUSG00000035439	Haus8	4HAUS augmin-like complex, subunit 8
chr1_43110483_43110983	chr1	43110483	43110983	501	*	-1.71621	7.37733e-05	-0.0183908	Intron (ENSMUST00000010434.7/98404, intron 2 of 3)	1	43098710	43115947	17238	1	98404	11773	ENSMUSG00000010290	AI597479	expressed sequence AI597479
chr11_70247422_70247922	chr11	70247422	70247922	501	*	-1.71621	7.37733e-05	-0.0183908	Intron (ENSMUST00000000329.8/11684, intron 8 of 13)	11	70241457	70255353	13897	2	11684	7431	ENSMUSG00000000320	Alox12	arachidonate 12-lipoxygenase
chr12_5263022_5263522	chr12	5263022	5263522	501	*	-1.71621	7.37733e-05	-0.0183908	Intron (ENSMUST00000020958.8/208439, intron 2 of 13)	12	5077472	5375682	298211	2	208439	112160	ENSMUSG00000020627	Klhl29	kelch-like 29
chr12_112626254_112626754	chr12	112626254	112626754	501	*	-1.71621	7.37733e-05	-0.0183908	Intron (ENSMUST00000021726.7/11565, intron 1 of 12)	12	112620045	112641360	21316	1	11565	6209	ENSMUSG00000011148	Adssl1	adenylosuccinate synthetase like 1
chr14_103065525_103066025	chr14	103065525	103066025	501	*	-1.71621	7.37733e-05	-0.0183908	Distal Intergenic	14	103070216	103077628	7413	1	211286	-4191	ENSMUSG00000022125	Cln5	ceroid-lipofuscinosis, neuronal 5
chr15_74528832_74529332	chr15	74528832	74529332	501	*	-1.71621	7.37733e-05	-0.0183908	5' UTR	15	74516195	74589465	73271	1	107831	12637	ENSMUSG00000034730	Adgrb1	adhesion G protein-coupled receptor B1
chr17_5198232_5198732	chr17	5198232	5198732	501	*	-1.71621	7.37733e-05	-0.0183908	Intron (ENSMUST00000092723.10/239985, intron 4 of 18)	17	4994332	5347656	353325	1	239985	203900	ENSMUSG00000069729	Arid1b	AT rich interactive domain 1B (SWI-like)
chr17_90383022_90383522	chr17	90383022	90383522	501	*	-1.71621	7.37733e-05	-0.0183908	Intron (ENSMUST00000072671.13/18189, intron 15 of 20)	17	90792766	90794006	1241	2	102634634	410484	NA	Gm20491	enolase 1, alpha non-neuron pseudogene
chr19_7266453_7266953	chr19	7266453	7266953	501	*	-1.71621	7.37733e-05	-0.0183908	Promoter (<=1kb)	19	7267325	7275225	7901	1	104383	-372	ENSMUSG00000024968	Rcor2	REST corepressor 2
chr2_136741779_136742279	chr2	136741779	136742279	501	*	-1.71621	7.37733e-05	-0.0183908	Intron (ENSMUST00000028727.10/20614, intron 1 of 7)	2	136713453	136782428	68976	1	20614	28326	ENSMUSG00000027273	Snap25	synaptosomal-associated protein 25
chr4_148130505_148131005	chr4	148130505	148131005	501	*	-1.71621	7.37733e-05	-0.0183908	Promoter (<=1kb)	4	148098437	148130698	32262	2	70433	0	ENSMUSG00000029005	Draxin	dorsal inhibitory axon guidance protein
chr5_19970625_19971125	chr5	19970625	19971125	501	*	-1.71621	7.37733e-05	-0.0183908	Intron (ENSMUST00000197354.4/50791, intron 2 of 21)	5	19227036	20704792	1477757	1	50791	743589	ENSMUSG00000040003	Magi2	membrane associated guanylate kinase, WW and PDZ domain containing 2
chr5_35058547_35059047	chr5	35058547	35059047	501	*	-1.71621	7.37733e-05	-0.0183908	Promoter (1-2kb)	5	35056766	35087839	31074	1	231134	1781	ENSMUSG00000044716	Dok7	docking protein 7
chr5_35862585_35863085	chr5	35862585	35863085	501	*	-1.71621	7.37733e-05	-0.0183908	Intron (ENSMUST00000101280.9/231148, intron 16 of 18)	5	35893319	36003923	110605	1	70292	-30234	ENSMUSG00000029094	Afap1	actin filament associated protein 1
chr5_129782220_129782720	chr5	129782220	129782720	501	*	-1.71621	7.37733e-05	-0.0183908	Intron (ENSMUST00000031399.12/100678, intron 1 of 7)	5	129786998	129846371	59374	1	12466	-4278	ENSMUSG00000029447	Cct6a	chaperonin containing Tcp1, subunit 6a (zeta)
chr6_91162178_91162678	chr6	91162178	91162678	501	*	-1.71621	7.37733e-05	-0.0183908	Intron (ENSMUST00000041736.10/232232, intron 3 of 9)	6	91156665	91174692	18028	1	232232	5513	ENSMUSG00000034245	Hdac11	histone deacetylase 11
chr14_48331829_48332329	chr14	48331829	48332329	501	*	-1.2854	7.3927e-05	-0.0264368	Distal Intergenic	14	48446124	48524246	78123	1	218989	-113795	ENSMUSG00000036339	Tmem260	transmembrane protein 260
chr15_74157844_74158344	chr15	74157844	74158344	501	*	-1.2854	7.3927e-05	-0.0264368	Distal Intergenic	15	73760067	73839699	79633	2	268816	-318145	ENSMUSG00000072487	Mroh5	maestro heat-like repeat family member 5
chr2_73566877_73567377	chr2	73566877	73567377	501	*	-1.2854	7.3927e-05	-0.0264368	Exon (ENSMUST00000028515.3/11435, exon 8 of 9)	2	73563215	73580338	17124	2	11435	12961	ENSMUSG00000027107	Chrna1	cholinergic receptor, nicotinic, alpha polypeptide 1 (muscle)
chr6_82881383_82881883	chr6	82881383	82881883	501	*	-1.2854	7.3927e-05	-0.0264368	Promoter (<=1kb)	6	82877864	82881853	3990	2	69652	0	ENSMUSG00000100291	2310069B03Rik	RIKEN cDNA 2310069B03 gene
chr7_75913878_75914378	chr7	75913878	75914378	501	*	-1.2854	7.3927e-05	-0.0264368	Distal Intergenic	7	75848310	75874131	25822	1	207952	65568	ENSMUSG00000055652	Klhl25	kelch-like 25
chr10_122447234_122447734	chr10	122447234	122447734	501	*	-1.38702	7.44844e-05	-0.0241379	Promoter (<=1kb)	10	122448499	122453452	4954	1	54140	-765	ENSMUSG00000020123	Avpr1a	arginine vasopressin receptor 1A
chr12_104032164_104032664	chr12	104032164	104032664	501	*	-1.38702	7.44844e-05	-0.0241379	Exon (ENSMUST00000043915.3/68054, exon 4 of 5)	12	104028769	104044443	15675	2	68054	11779	ENSMUSG00000041567	Serpina12	serine (or cysteine) peptidase inhibitor, clade A (alpha-1 antiproteinase, antitrypsin), member 12
chr14_43983902_43984402	chr14	43983902	43984402	501	*	-1.38702	7.44844e-05	-0.0241379	Intron (ENSMUST00000227597.1/ENSMUST00000227597.1, intron 1 of 1)	14	43957069	43963072	6004	1	503844	26833	ENSMUSG00000053961	Ang5	angiogenin, ribonuclease A family, member 5
chr17_32179929_32180429	chr17	32179929	32180429	501	*	-1.38702	7.44844e-05	-0.0241379	Distal Intergenic	17	32183770	32189549	5780	2	71932	9120	ENSMUSG00000037577	Ephx3	epoxide hydrolase 3
chr7_109986729_109987229	chr7	109986729	109987229	501	*	-1.38702	7.44844e-05	-0.0241379	Promoter (<=1kb)	7	109972187	109986929	14743	2	233724	0	ENSMUSG00000047554	Tmem41b	transmembrane protein 41B
chr7_117502558_117503058	chr7	117502558	117503058	501	*	-1.38702	7.44844e-05	-0.0241379	Intron (ENSMUST00000160035.7/233781, intron 2 of 6)	7	117380979	117673580	292602	1	233781	121579	ENSMUSG00000030657	Xylt1	xylosyltransferase 1
chr8_34145860_34146360	chr8	34145860	34146360	501	*	-1.38702	7.44844e-05	-0.0241379	Promoter (<=1kb)	8	34135572	34147033	11462	2	68192	673	ENSMUSG00000031513	Leprotl1	leptin receptor overlapping transcript-like 1
chr11_85849004_85849504	chr11	85849004	85849504	501	*	-1	8.31649e-05	-0.0344828	Intron (ENSMUST00000146433.1/ENSMUST00000146433.1, intron 1 of 2)	11	85832551	85841948	9398	1	21385	16453	ENSMUSG00000000093	Tbx2	T-box 2
chr2_125723647_125724147	chr2	125723647	125724147	501	*	-1	8.31649e-05	-0.0344828	Promoter (<=1kb)	2	125627447	125724148	96702	2	271849	1	ENSMUSG00000035109	Shc4	SHC (Src homology 2 domain containing) family, member 4
chr4_151335298_151335798	chr4	151335298	151335798	501	*	-1	8.31649e-05	-0.0344828	Intron (ENSMUST00000169423.8/100072, intron 5 of 24)	4	151089570	151091449	1880	1	105704528	245728	ENSMUSG00000078491	Gm13090	predicted gene 13090
chr8_70864986_70865486	chr8	70864986	70865486	501	*	-1	8.31649e-05	-0.0344828	Promoter (1-2kb)	8	70842049	70863258	21210	2	84036	-1728	ENSMUSG00000002908	Kcnn1	potassium intermediate/small conductance calcium-activated channel, subfamily N, member 1
chr12_84038214_84038714	chr12	84038214	84038714	501	*	-1.22239	8.73109e-05	-0.0275862	Promoter (<=1kb)	12	84038379	84048601	10223	1	171282	0	ENSMUSG00000052392	Acot4	acyl-CoA thioesterase 4
chr13_92750926_92751426	chr13	92750926	92751426	501	*	-1.22239	8.73109e-05	-0.0275862	Downstream (<1kb)	13	92751590	92794818	43229	2	21828	43392	ENSMUSG00000021702	Thbs4	thrombospondin 4
chr15_102665458_102665958	chr15	102665458	102665958	501	*	-1.22239	8.73109e-05	-0.0275862	Exon (ENSMUST00000185641.6/67942, exon 3 of 5)	15	102671792	102671866	75	2	751542	5908	ENSMUSG00000076009	Mir688	microRNA 688
chr16_18052559_18053059	chr16	18052559	18053059	501	*	-1.22239	8.73109e-05	-0.0275862	Promoter (<=1kb)	16	18052860	18071632	18773	1	13353	0	ENSMUSG00000003531	Dgcr6	DiGeorge syndrome critical region gene 6
chr2_92529889_92530389	chr2	92529889	92530389	501	*	-1.22239	8.73109e-05	-0.0275862	Exon (ENSMUST00000142249.2/ENSMUST00000142249.2, exon 5 of 6)	2	92592206	92592277	72	1	102466819	-61817	ENSMUSG00000099223	Mir7221	microRNA 7221
chr1_190977208_190977708	chr1	190977208	190977708	501	*	-1.02554	9.04974e-05	-0.0333333	Promoter (1-2kb)	1	190947646	190979296	31651	2	226841	1588	ENSMUSG00000037568	Vash2	vasohibin 2
chr12_82932803_82933303	chr12	82932803	82933303	501	*	-1.02554	9.04974e-05	-0.0333333	Exon (ENSMUST00000187123.1/74283, exon 3 of 3)	12	82932520	82939155	6636	2	74283	5852	ENSMUSG00000100890	1700085C21Rik	RIKEN cDNA 1700085C21 gene
chr13_54503477_54503977	chr13	54503477	54503977	501	*	-1.02554	9.04974e-05	-0.0333333	Promoter (<=1kb)	13	54503779	54551290	47512	1	319719	0	ENSMUSG00000043183	Simc1	SUMO-interacting motifs containing 1
chr10_91124378_91124878	chr10	91124378	91124878	501	*	-1.16993	9.58694e-05	-0.0287356	Promoter (<=1kb)	10	91116574	91124059	7486	2	18674	-319	ENSMUSG00000061904	Slc25a3	solute carrier family 25 (mitochondrial carrier, phosphate carrier), member 3
chr11_60932489_60932989	chr11	60932489	60932989	501	*	-1.16993	9.58694e-05	-0.0287356	Promoter (<=1kb)	11	60932033	60952811	20779	1	26397	456	ENSMUSG00000018932	Map2k3	mitogen-activated protein kinase kinase 3
chr14_55884018_55884518	chr14	55884018	55884518	501	*	-1.16993	9.58694e-05	-0.0287356	Promoter (<=1kb)	14	55878913	55884392	5480	2	56410	0	ENSMUSG00000040380	Cbln3	cerebellin 3 precursor protein
chr4_13745046_13745546	chr4	13745046	13745546	501	*	-1.16993	9.58694e-05	-0.0287356	Promoter (1-2kb)	4	13743436	13893649	150214	1	12395	1610	ENSMUSG00000006586	Runx1t1	RUNX1 translocation partner 1
chr4_136160054_136160554	chr4	136160054	136160554	501	*	-1.16993	9.58694e-05	-0.0287356	Distal Intergenic	4	136172394	136196057	23664	1	242705	-11840	ENSMUSG00000018983	E2f2	E2F transcription factor 2
chr7_112807399_112807899	chr7	112807399	112807899	501	*	-1.16993	9.58694e-05	-0.0287356	Intron (ENSMUST00000084705.11/21676, intron 2 of 11)	7	112679318	112906807	227490	1	21676	128081	ENSMUSG00000055320	Tead1	TEA domain family member 1
chr9_57162439_57162939	chr9	57162439	57162939	501	*	-1.16993	9.58694e-05	-0.0287356	Distal Intergenic	9	57155035	57158331	3297	2	66199	-4108	ENSMUSG00000032299	Commd4	COMM domain containing 4
chr1_38247872_38248372	chr1	38247872	38248372	501	*	-1.05445	9.59317e-05	-0.0321839	Intron (ENSMUST00000095027.8/16764, intron 10 of 21)	1	38132083	38159892	27810	1	329123	115789	ENSMUSG00000102716	Gm5099	predicted gene 5099
chr15_86057922_86058422	chr15	86057922	86058422	501	*	-1.05445	9.59317e-05	-0.0321839	Promoter (<=1kb)	15	86057695	86137634	79940	1	223752	227	ENSMUSG00000035900	Gramd4	GRAM domain containing 4
chr16_92157699_92158199	chr16	92157699	92158199	501	*	-1.05445	9.59317e-05	-0.0321839	Intron (ENSMUST00000232677.1/121022, intron 2 of 3)	16	92058322	92087473	29152	1	53881	99377	ENSMUSG00000089774	Slc5a3	solute carrier family 5 (inositol transporters), member 3
chr1_32896175_32896675	chr1	32896175	32896675	501	*	-1.41504	9.68035e-05	-0.0229885	Distal Intergenic	1	32543686	32547294	3609	2	408191	-348881	ENSMUSG00000091318	Gm5415	predicted gene 5415
chr11_6317397_6317897	chr11	6317397	6317897	501	*	1.41504	9.68035e-05	0.0229885	Intron (ENSMUST00000003461.14/18293, intron 4 of 22)	11	6291633	6356642	65010	1	18293	25764	ENSMUSG00000020456	Ogdh	oxoglutarate (alpha-ketoglutarate) dehydrogenase (lipoamide)
chr14_53776679_53777179	chr14	53776679	53777179	501	*	-1.41504	9.68035e-05	-0.0229885	5' UTR	14	54235479	54254104	18626	2	13135	476925	ENSMUSG00000022174	Dad1	defender against cell death 1
chr18_65805573_65806073	chr18	65805573	65806073	501	*	-1.41504	9.68035e-05	-0.0229885	Intron (ENSMUST00000025394.13/66286, intron 1 of 5)	18	65800515	65817684	17170	1	66286	5058	ENSMUSG00000024516	Sec11c	SEC11 homolog C, signal peptidase complex subunit
chr2_27741007_27741507	chr2	27741007	27741507	501	*	-1.41504	9.68035e-05	-0.0229885	Exon (ENSMUST00000129514.7/20181, exon 3 of 4)	2	27676440	27762957	86518	1	20181	64567	ENSMUSG00000015846	Rxra	retinoid X receptor alpha
chr2_31247488_31247988	chr2	31247488	31247988	501	*	-1.41504	9.68035e-05	-0.0229885	Promoter (1-2kb)	2	31245823	31295989	50167	1	14299	1665	ENSMUSG00000062661	Ncs1	neuronal calcium sensor 1
chr8_22608756_22609256	chr8	22608756	22609256	501	*	-1.41504	9.68035e-05	-0.0229885	Distal Intergenic	8	22624043	22627547	3505	1	234130	-14787	ENSMUSG00000031535	Dkk4	dickkopf WNT signaling pathway inhibitor 4
chr1_75248058_75248558	chr1	75248058	75248558	501	*	-1.08746	9.81277e-05	-0.0310345	Exon (ENSMUST00000027404.11/19275, exon 21 of 23)	1	75236406	75245692	9287	1	56812	11652	ENSMUSG00000026203	Dnajb2	DnaJ heat shock protein family (Hsp40) member B2
chr10_81575016_81575516	chr10	81575016	81575516	501	*	-1.12553	9.81277e-05	-0.0298851	Promoter (<=1kb)	10	81574561	81590845	16285	1	21886	455	ENSMUSG00000034771	Tle2	transducin-like enhancer of split 2
chr14_78203978_78204478	chr14	78203978	78204478	501	*	-1.12553	9.81277e-05	-0.0298851	Distal Intergenic	14	78191373	78191478	106	2	100316715	-12500	ENSMUSG00000087932	Mir1971	microRNA 1971
chr15_5115602_5116102	chr15	5115602	5116102	501	*	-1.12553	9.81277e-05	-0.0298851	Promoter (<=1kb)	15	5116645	5119140	2496	1	67281	-543	ENSMUSG00000041841	Rpl37	ribosomal protein L37
chr17_57276786_57277286	chr17	57276786	57277286	501	*	-1.12553	9.81277e-05	-0.0298851	Promoter (1-2kb)	17	57279100	57328031	48932	1	22324	-1814	ENSMUSG00000034116	Vav1	vav 1 oncogene
chr17_62879859_62880359	chr17	62879859	62880359	501	*	-1.08746	9.81277e-05	-0.0310345	Promoter (<=1kb)	17	62604184	62881317	277134	2	13640	958	ENSMUSG00000048915	Efna5	ephrin A5
chr19_60467144_60467644	chr19	60467144	60467644	501	*	-1.08746	9.81277e-05	-0.0310345	Promoter (<=1kb)	19	60466732	60468304	1573	2	226278	660	ENSMUSG00000045052	Prlhr	prolactin releasing hormone receptor
chr3_138609559_138610059	chr3	138609559	138610059	501	*	-1.12553	9.81277e-05	-0.0298851	Distal Intergenic	3	138526421	138526485	65	1	100316706	83138	ENSMUSG00000088373	Mir1956	microRNA 1956
chr4_120405390_120405890	chr4	120405390	120405890	501	*	-1.08746	9.81277e-05	-0.0310345	Promoter (<=1kb)	4	120405281	120530186	124906	1	29871	109	ENSMUSG00000000085	Scmh1	sex comb on midleg homolog 1
chr4_133201091_133201591	chr4	133201091	133201591	501	*	-1.12553	9.81277e-05	-0.0298851	Distal Intergenic	4	133195655	133195716	62	1	102466215	5436	ENSMUSG00000099202	Mir7017	microRNA 7017
chr5_30712358_30712858	chr5	30712358	30712858	501	*	-1.08746	9.81277e-05	-0.0310345	Promoter (<=1kb)	5	30711564	30799375	87812	1	65254	794	ENSMUSG00000029168	Dpysl5	dihydropyrimidinase-like 5
chr5_32614669_32615169	chr5	32614669	32615169	501	*	-1.08746	9.81277e-05	-0.0310345	Intron (ENSMUST00000202543.3/22612, intron 1 of 11)	5	32611171	32687057	75887	1	22612	3498	ENSMUSG00000014932	Yes1	YES proto-oncogene 1, Src family tyrosine kinase
chr8_8689696_8690196	chr8	8689696	8690196	501	*	-1.08746	9.81277e-05	-0.0310345	Promoter (<=1kb)	8	8690093	8690162	70	2	102465762	0	ENSMUSG00000098917	Mir7654	microRNA 7654
chr9_62342517_62343017	chr9	62342517	62343017	501	*	-1.08746	9.81277e-05	-0.0310345	Promoter (1-2kb)	9	62341293	62378812	37520	1	11737	1224	ENSMUSG00000032249	Anp32a	acidic (leucine-rich) nuclear phosphoprotein 32 family, member A
chr1_59623252_59623752	chr1	59623252	59623752	501	*	-1.30256	9.89392e-05	-0.0252874	Intron (ENSMUST00000114243.7/381260, intron 13 of 19)	1	59586558	59670834	84277	2	22218	47082	ENSMUSG00000026021	Sumo1	small ubiquitin-like modifier 1
chr12_31633926_31634426	chr12	31633926	31634426	501	*	-1.30256	9.89392e-05	-0.0252874	Promoter (<=1kb)	12	31590967	31634658	43692	2	12033	232	ENSMUSG00000020650	Bcap29	B cell receptor associated protein 29
chr16_46304910_46305410	chr16	46304910	46305410	501	*	-1.30256	9.89392e-05	-0.0252874	Distal Intergenic	16	46152985	46155077	2093	2	11615	-149833	ENSMUSG00000048087	Gm4737	predicted gene 4737
chr17_57105135_57105635	chr17	57105135	57105635	501	*	-1.30256	9.89392e-05	-0.0252874	Promoter (<=1kb)	17	57105325	57107757	2433	1	21950	0	ENSMUSG00000035678	Tnfsf9	tumor necrosis factor (ligand) superfamily, member 9
chr2_32349715_32350215	chr2	32349715	32350215	501	*	-1.30256	9.89392e-05	-0.0252874	Promoter (2-3kb)	2	32352327	32380970	28644	1	68379	-2112	ENSMUSG00000039205	Ciz1	CDKN1A interacting zinc finger protein 1
chr2_125624487_125624987	chr2	125624487	125624987	501	*	-1.30256	9.89392e-05	-0.0252874	Promoter (<=1kb)	2	125563088	125625113	62026	2	99100	126	ENSMUSG00000068394	Cep152	centrosomal protein 152
chr3_157232656_157233156	chr3	157232656	157233156	501	*	-1.30256	9.89392e-05	-0.0252874	Intron (ENSMUST00000074015.10/320840, intron 6 of 6)	3	157527515	157534090	6576	2	381498	300934	ENSMUSG00000105834	4930592C13Rik	RIKEN cDNA 4930592C13 gene
chr7_24384851_24385351	chr7	24384851	24385351	501	*	-1.30256	9.89392e-05	-0.0252874	3' UTR	7	24399619	24422778	23160	1	71997	-14268	ENSMUSG00000002210	Smg9	smg-9 homolog, nonsense mediated mRNA decay factor (C. elegans)
chr1_34143003_34143503	chr1	34143003	34143503	501	*	-1.44746	0.000119093	-0.0218391	Intron (ENSMUST00000183034.4/13518, intron 9 of 102)	1	34117359	34117431	73	1	102466987	25644	ENSMUSG00000105982	Mir6896	microRNA 6896
chr1_92053340_92053840	chr1	92053340	92053840	501	*	-2	0.000119093	-0.0137931	Intron (ENSMUST00000097644.8/208727, intron 3 of 26)	1	91928779	92195699	266921	2	208727	141859	ENSMUSG00000026313	Hdac4	histone deacetylase 4
chr1_92742823_92743323	chr1	92742823	92743323	501	*	-1.23447	0.000119093	-0.0264368	Distal Intergenic	1	92831645	92860779	29135	1	14733	-88322	ENSMUSG00000034220	Gpc1	glypican 1
chr1_190823749_190824249	chr1	190823749	190824249	501	*	2	0.000119093	0.0137931	Intron (ENSMUST00000159624.7/320119, intron 6 of 12)	1	190700202	190911770	211569	2	320119	87521	ENSMUSG00000089872	Rps6kc1	ribosomal protein S6 kinase polypeptide 1
chr10_59220853_59221353	chr10	59220853	59221353	501	*	-1.44746	0.000119093	-0.0218391	Promoter (<=1kb)	10	59141627	59221847	80221	2	103080	494	ENSMUSG00000019917	Septin10	septin 10
chr10_78446233_78446733	chr10	78446233	78446733	501	*	-2	0.000119093	-0.0137931	Promoter (1-2kb)	10	78445095	78445157	63	2	102466762	-1076	ENSMUSG00000098279	Mir6908	microRNA 6908
chr10_80872421_80872921	chr10	80872421	80872921	501	*	2	0.000119093	0.0137931	Promoter (<=1kb)	10	80871848	80899492	27645	1	432478	573	ENSMUSG00000059406	Tmprss9	transmembrane protease, serine 9
chr10_86344552_86345052	chr10	86344552	86345052	501	*	-2	0.000119093	-0.0137931	Exon (ENSMUST00000020234.13/21859, exon 4 of 5)	10	86300372	86349506	49135	1	21859	44180	ENSMUSG00000020044	Timp3	tissue inhibitor of metalloproteinase 3
chr11_22631500_22632000	chr11	22631500	22632000	501	*	-1.44746	0.000119093	-0.0218391	Distal Intergenic	11	22512088	22519234	7147	1	103765	119412	ENSMUSG00000049904	Tmem17	transmembrane protein 17
chr11_45539373_45539873	chr11	45539373	45539873	501	*	-1.44746	0.000119093	-0.0218391	Distal Intergenic	11	45808087	45841171	33085	1	100009664	-268214	NA	F630206G17Rik	RIKEN cDNA F630206G17 gene
chr11_60707646_60708146	chr11	60707646	60708146	501	*	2	0.000119093	0.0137931	Exon (ENSMUST00000052346.9/16897, exon 11 of 22)	11	60699723	60714186	14464	1	16897	7923	ENSMUSG00000020536	Llgl1	LLGL1 scribble cell polarity complex component
chr11_71790178_71790678	chr11	71790178	71790678	501	*	-2	0.000119093	-0.0137931	Distal Intergenic	11	71749920	71789647	39728	1	216881	40258	ENSMUSG00000020811	Wscd1	WSC domain containing 1
chr11_101937172_101937672	chr11	101937172	101937672	501	*	-1.44746	0.000119093	-0.0218391	Distal Intergenic	11	101952421	101960573	8153	1	73887	-14749	ENSMUSG00000071818	4930417O22Rik	RIKEN cDNA 4930417O22 gene
chr11_119942154_119942654	chr11	119942154	119942654	501	*	-1.23447	0.000119093	-0.0264368	Promoter (<=1kb)	11	119942763	120006782	64020	1	108100	-109	ENSMUSG00000025372	Baiap2	brain-specific angiogenesis inhibitor 1-associated protein 2
chr12_108392916_108393416	chr12	108392916	108393416	501	*	-2	0.000119093	-0.0137931	Intron (ENSMUST00000138456.7/68519, intron 1 of 6)	12	108370957	108539617	168661	1	68519	21959	ENSMUSG00000058070	Eml1	echinoderm microtubule associated protein like 1
chr15_28154630_28155130	chr15	28154630	28155130	501	*	-1.23447	0.000119093	-0.0264368	Intron (ENSMUST00000227452.1/ENSMUST00000227452.1, intron 1 of 2)	15	28203752	28472052	268301	1	110082	-48622	ENSMUSG00000022262	Dnah5	dynein, axonemal, heavy chain 5
chr15_73730812_73731312	chr15	73730812	73731312	501	*	-2	0.000119093	-0.0137931	Intron (ENSMUST00000230864.1/19245, intron 1 of 3)	15	73723145	73758766	35622	1	19245	7667	ENSMUSG00000059895	Ptp4a3	protein tyrosine phosphatase 4a3
chr15_77962158_77962658	chr15	77962158	77962658	501	*	-2	0.000119093	-0.0137931	Exon (ENSMUST00000100484.5/55944, exon 10 of 15)	15	77940522	77956722	16201	2	239554	-5436	ENSMUSG00000016552	Foxred2	FAD-dependent oxidoreductase domain containing 2
chr17_27752844_27753344	chr17	27752844	27753344	501	*	-2	0.000119093	-0.0137931	3' UTR	17	27714352	27728955	14604	2	30051	-23889	ENSMUSG00000024215	Spdef	SAM pointed domain containing ets transcription factor
chr19_9993549_9994049	chr19	9993549	9994049	501	*	-2	0.000119093	-0.0137931	Intron (ENSMUST00000117346.1/24115, intron 2 of 11)	19	9985174	10001633	16460	2	24115	7584	ENSMUSG00000037418	Best1	bestrophin 1
chr2_25403529_25404029	chr2	25403529	25404029	501	*	-1.23447	0.000119093	-0.0264368	Exon (ENSMUST00000156824.1/18146, exon 1 of 4)	2	25400469	25409494	9026	1	18146	3060	ENSMUSG00000015094	Npdc1	neural proliferation, differentiation and control 1
chr2_30928821_30929321	chr2	30928821	30929321	501	*	-1.23447	0.000119093	-0.0264368	Intron (ENSMUST00000132244.1/ENSMUST00000132244.1, intron 1 of 2)	2	30952959	30959015	6057	1	30934	-23638	ENSMUSG00000026848	Tor1b	torsin family 1, member B
chr2_37517776_37518276	chr2	37517776	37518276	501	*	-1.44746	0.000119093	-0.0218391	Promoter (1-2kb)	2	37516332	37520603	4272	1	338346	1444	ENSMUSG00000053164	Gpr21	G protein-coupled receptor 21
chr2_44104495_44104995	chr2	44104495	44104995	501	*	2	0.000119093	0.0137931	Intron (ENSMUST00000112824.7/76117, intron 8 of 14)	2	44059238	44065324	6087	2	320872	-39171	ENSMUSG00000085089	Arhgap15os	Rho GTPase activating protein 15, opposite strand
chr2_127962004_127962504	chr2	127962004	127962504	501	*	-1.44746	0.000119093	-0.0218391	Intron (ENSMUST00000028859.7/74121, intron 9 of 17)	2	127838876	128123873	284998	1	74121	123128	ENSMUSG00000027380	Acoxl	acyl-Coenzyme A oxidase-like
chr2_156576419_156576919	chr2	156576419	156576919	501	*	-2	0.000119093	-0.0137931	Exon (ENSMUST00000144818.1/ENSMUST00000144818.1, exon 2 of 2)	2	156547584	156568972	21389	1	68295	28835	ENSMUSG00000027628	Aar2	AAR2 splicing factor homolog
chr2_160578668_160579168	chr2	160578668	160579168	501	*	-1.23447	0.000119093	-0.0264368	Intron (ENSMUST00000109473.1/ENSMUST00000109473.1, intron 1 of 2)	2	160645888	160722764	76877	1	21969	-66720	ENSMUSG00000070544	Top1	topoisomerase (DNA) I
chr4_63010265_63010765	chr4	63010265	63010765	501	*	2	0.000119093	0.0137931	Intron (ENSMUST00000030043.12/72701, intron 1 of 11)	4	62965573	63139708	174136	1	72701	44692	ENSMUSG00000028358	Zfp618	zinc finger protein 618
chr4_102592098_102592598	chr4	102592098	102592598	501	*	-1.44746	0.000119093	-0.0218391	Intron (ENSMUST00000106911.7/18578, intron 9 of 16)	4	102741297	102973628	232332	1	73094	-148699	ENSMUSG00000028524	Sgip1	SH3-domain GRB2-like (endophilin) interacting protein 1
chr4_126134566_126135066	chr4	126134566	126135066	501	*	-2	0.000119093	-0.0137931	Exon (ENSMUST00000116286.8/74178, exon 9 of 13)	4	126147744	126149875	2132	1	230752	-12678	ENSMUSG00000050212	Eva1b	eva-1 homolog B (C. elegans)
chr4_151967817_151968317	chr4	151967817	151968317	501	*	-1.44746	0.000119093	-0.0218391	Exon (ENSMUST00000142198.7/230935, exon 1 of 7)	4	151982639	151988997	6359	2	69876	20680	ENSMUSG00000039759	Thap3	THAP domain containing, apoptosis associated protein 3
chr5_25497251_25497751	chr5	25497251	25497751	501	*	-1.44746	0.000119093	-0.0218391	Promoter (1-2kb)	5	25271798	25498783	226986	2	231051	1032	ENSMUSG00000038056	Kmt2c	lysine (K)-specific methyltransferase 2C
chr5_113464898_113465398	chr5	113464898	113465398	501	*	-2	0.000119093	-0.0137931	Distal Intergenic	5	113490447	113589725	99279	1	320916	-25049	ENSMUSG00000063430	Wscd2	WSC domain containing 2
chr5_115482200_115482700	chr5	115482200	115482700	501	*	-1.44746	0.000119093	-0.0218391	Promoter (2-3kb)	5	115478010	115484725	6716	2	75387	2025	ENSMUSG00000029524	Sirt4	sirtuin 4
chr5_124162489_124162989	chr5	124162489	124162989	501	*	-1.44746	0.000119093	-0.0218391	Intron (ENSMUST00000086123.10/19679, intron 1 of 23)	5	124116089	124118196	2108	1	65105	46400	ENSMUSG00000029404	Arl6ip4	ADP-ribosylation factor-like 6 interacting protein 4
chr5_139317222_139317722	chr5	139317222	139317722	501	*	2	0.000119093	0.0137931	Intron (ENSMUST00000110865.1/231821, intron 1 of 10)	5	139271876	139325622	53747	2	231821	7900	ENSMUSG00000056413	Adap1	ArfGAP with dual PH domains 1
chr7_12913489_12913989	chr7	12913489	12913989	501	*	-2	0.000119093	-0.0137931	Distal Intergenic	7	12922290	12926686	4397	1	20103	-8301	ENSMUSG00000012848	Rps5	ribosomal protein S5
chr7_28790961_28791461	chr7	28790961	28791461	501	*	-2	0.000119093	-0.0137931	Promoter (1-2kb)	7	28788969	28798963	9995	1	320435	1992	ENSMUSG00000051735	Rinl	Ras and Rab interactor-like
chr7_44491427_44491927	chr7	44491427	44491927	501	*	-1.44746	0.000119093	-0.0218391	Exon (ENSMUST00000150342.1/69683, exon 6 of 6)	7	44489937	44496529	6593	2	69683	4602	ENSMUSG00000008140	Emc10	ER membrane protein complex subunit 10
chr7_49518689_49519189	chr7	49518689	49519189	501	*	-2	0.000119093	-0.0137931	Intron (ENSMUST00000183659.7/78286, intron 12 of 39)	7	49631499	49636849	5351	2	13172	117660	ENSMUSG00000030507	Dbx1	developing brain homeobox 1
chr7_65402402_65402902	chr7	65402402	65402902	501	*	-2	0.000119093	-0.0137931	Intron (ENSMUST00000206228.1/21872, intron 2 of 4)	7	65296165	65527696	231532	2	21872	124794	ENSMUSG00000030516	Tjp1	tight junction protein 1
chr7_126948814_126949314	chr7	126948814	126949314	501	*	-1	0.000119093	-0.0333333	Promoter (<=1kb)	7	126945567	126949582	4016	2	233879	268	ENSMUSG00000046378	Asphd1	aspartate beta-hydroxylase domain containing 1
chr7_130895533_130896033	chr7	130895533	130896033	501	*	-2	0.000119093	-0.0137931	Intron (ENSMUST00000120441.7/101476, intron 5 of 12)	7	130908268	130908335	68	1	102466219	-12235	ENSMUSG00000104914	Mir7061	microRNA 7061
chr8_94254812_94255312	chr8	94254812	94255312	501	*	-2	0.000119093	-0.0137931	Intron (ENSMUST00000079961.13/71805, intron 3 of 21)	8	94214564	94317227	102664	1	71805	40248	ENSMUSG00000032939	Nup93	nucleoporin 93
chr8_105853117_105853617	chr8	105853117	105853617	501	*	2	0.000119093	0.0137931	Promoter (<=1kb)	8	105844673	105853278	8606	2	320394	0	ENSMUSG00000036672	Cenpt	centromere protein T
chrX_162800361_162800861	chrX	162800361	162800861	501	*	-2	0.000119093	-0.0137931	Intron (ENSMUST00000131463.1/353170, intron 2 of 7)	20	162778919	162829454	50536	2	353170	28593	ENSMUSG00000038344	Txlng	taxilin gamma
chr18_20665968_20666468	chr18	20665968	20666468	501	*	-1.02647	0.000125817	-0.0321839	Promoter (<=1kb)	18	20665280	20674321	9042	1	22139	688	ENSMUSG00000061808	Ttr	transthyretin
chr4_110128884_110129384	chr4	110128884	110129384	501	*	-1.02647	0.000125817	-0.0321839	Distal Intergenic	4	109978053	109983687	5635	1	242620	150831	ENSMUSG00000047143	Dmrta2	doublesex and mab-3 related transcription factor like family A2
chr4_138343448_138343948	chr4	138343448	138343948	501	*	-1.02647	0.000125817	-0.0321839	Exon (ENSMUST00000144986.1/72269, exon 1 of 2)	4	138313409	138326307	12899	2	68943	-17141	ENSMUSG00000028756	Pink1	PTEN induced putative kinase 1
chr8_71602767_71603267	chr8	71602767	71603267	501	*	-1.02647	0.000125817	-0.0321839	Exon (ENSMUST00000143662.7/100037278, exon 8 of 15)	8	71597648	71607936	10289	1	100037278	5119	ENSMUSG00000043243	Niban3	niban apoptosis regulator 3
chr11_98296222_98296722	chr11	98296222	98296722	501	*	-1.17834	0.000130377	-0.0275862	Distal Intergenic	11	98325415	98329648	4234	2	18013	32926	ENSMUSG00000038255	Neurod2	neurogenic differentiation 2
chr13_46310612_46311112	chr13	46310612	46311112	501	*	-1.17834	0.000130377	-0.0275862	Distal Intergenic	13	46273721	46300115	26395	1	380842	36891	ENSMUSG00000063529	Stmnd1	stathmin domain containing 1
chr19_55908919_55909419	chr19	55908919	55909419	501	*	-1.17834	0.000130377	-0.0275862	Exon (ENSMUST00000126434.7/21416, exon 5 of 5)	19	55741820	55933654	191835	1	21416	167099	ENSMUSG00000024985	Tcf7l2	transcription factor 7 like 2, T cell specific, HMG box
chr2_129874499_129874999	chr2	129874499	129874999	501	*	-1.17834	0.000130377	-0.0275862	Distal Intergenic	2	129800517	129832287	31771	1	67333	73982	ENSMUSG00000037885	Stk35	serine/threonine kinase 35
chr5_64345142_64345642	chr5	64345142	64345642	501	*	-1.17834	0.000130377	-0.0275862	Exon (ENSMUST00000043893.12/57915, exon 21 of 22)	5	64454813	64467943	13131	2	69999	122301	ENSMUSG00000100911	1700027F09Rik	RIKEN cDNA 1700027F09 gene
chr5_99569538_99570038	chr5	99569538	99570038	501	*	-1.17834	0.000130377	-0.0275862	Intron (ENSMUST00000209346.1/320292, intron 2 of 16)	5	99217426	99728812	511387	2	320292	158774	ENSMUSG00000089809	Rasgef1b	RasGEF domain family, member 1B
chr6_99666598_99667098	chr6	99666598	99667098	501	*	-1.17834	0.000130377	-0.0275862	Promoter (<=1kb)	6	99257484	99666797	409314	2	66892	0	ENSMUSG00000093661	Eif4e3	eukaryotic translation initiation factor 4E member 3
chr7_101011785_101012285	chr7	101011785	101012285	501	*	-1.17834	0.000130377	-0.0275862	Promoter (<=1kb)	7	100996568	101012866	16299	2	18442	581	ENSMUSG00000032860	P2ry2	purinergic receptor P2Y, G-protein coupled 2
chr9_40708272_40708772	chr9	40708272	40708772	501	*	-1.17834	0.000130377	-0.0275862	Intron (ENSMUST00000139577.1/71566, intron 1 of 2)	9	40685962	40785319	99358	1	71566	22310	ENSMUSG00000032024	Clmp	CXADR-like membrane protein
chr10_56369066_56369566	chr10	56369066	56369566	501	*	-1.32193	0.000130995	-0.0241379	Distal Intergenic	10	56377330	56402513	25184	1	14609	-7764	ENSMUSG00000050953	Gja1	gap junction protein, alpha 1
chr10_80208726_80209226	chr10	80208726	80209226	501	*	-1.32193	0.000130995	-0.0241379	Distal Intergenic	10	80226434	80243903	17470	1	68114	-17208	ENSMUSG00000020156	Pwwp3a	PWWP domain containing 3A, DNA repair factor
chr19_14314284_14314784	chr19	14314284	14314784	501	*	-1.32193	0.000130995	-0.0241379	Distal Intergenic	19	14448150	14598051	149902	2	21888	283267	ENSMUSG00000024642	Tle4	transducin-like enhancer of split 4
chr19_27779953_27780453	chr19	27779953	27780453	501	*	-1.32193	0.000130995	-0.0241379	Intron (ENSMUST00000165566.7/19726, intron 16 of 17)	19	27761721	28011166	249446	2	19726	230713	ENSMUSG00000040929	Rfx3	regulatory factor X, 3 (influences HLA class II expression)
chr7_49842745_49843245	chr7	49842745	49843245	501	*	-1.32193	0.000130995	-0.0241379	Intron (ENSMUST00000032715.12/71974, intron 13 of 15)	7	49778346	49858265	79920	1	71974	64399	ENSMUSG00000030505	Prmt3	protein arginine N-methyltransferase 3
chr7_79053299_79053799	chr7	79053299	79053799	501	*	-1.32193	0.000130995	-0.0241379	Promoter (<=1kb)	7	79018053	79053323	35271	2	102633600	0	ENSMUSG00000097441	Gm26633	predicted gene, 26633
chr10_76530752_76531252	chr10	76530752	76531252	501	*	-1.05658	0.000132484	-0.0310345	Promoter (<=1kb)	10	76531588	76557138	25551	1	16987	-336	ENSMUSG00000033105	Lss	lanosterol synthase
chr19_3389091_3389591	chr19	3389091	3389591	501	*	-1.05658	0.000132484	-0.0310345	Promoter (<=1kb)	19	3388857	3407823	18967	1	17771	234	ENSMUSG00000024905	Tesmin	testis expressed metallothionein like
chr2_18609205_18609705	chr2	18609205	18609705	501	*	-1.05658	0.000132484	-0.0310345	Distal Intergenic	2	18672384	18676231	3848	1	12238	-62679	ENSMUSG00000051154	Commd3	COMM domain containing 3
chr4_43381083_43381583	chr4	43381083	43381583	501	*	-1.05658	0.000132484	-0.0310345	Promoter (<=1kb)	4	43381979	43427088	45110	1	100213	-396	ENSMUSG00000035969	Rusc2	RUN and SH3 domain containing 2
chr6_32167616_32168116	chr6	32167616	32168116	501	*	-1.05658	0.000132484	-0.0310345	Intron (ENSMUST00000115096.3/243743, intron 25 of 31)	6	32050246	32058921	8676	1	76382	117370	ENSMUSG00000029766	1700012A03Rik	RIKEN cDNA 1700012A03 gene
chr1_34432988_34433488	chr1	34432988	34433488	501	*	-1.13124	0.000134984	-0.0287356	Promoter (<=1kb)	1	34427002	34433264	6263	2	100628580	0	ENSMUSG00000092852	Mir5103	microRNA 5103
chr11_104267423_104267923	chr11	104267423	104267923	501	*	-1.13124	0.000134984	-0.0287356	Intron (ENSMUST00000106992.9/17762, intron 1 of 9)	11	104231390	104332090	100701	1	17762	36033	ENSMUSG00000018411	Mapt	microtubule-associated protein tau
chr14_30455934_30456434	chr14	30455934	30456434	501	*	-1.13124	0.000134984	-0.0287356	Intron (ENSMUST00000112250.5/12289, intron 1 of 46)	14	30479535	30527063	47529	1	75901	-23101	ENSMUSG00000021962	Dcp1a	decapping mRNA 1A
chr4_150655915_150656415	chr4	150655915	150656415	501	*	-1.13124	0.000134984	-0.0287356	Distal Intergenic	4	150628572	150652174	23603	2	242773	-3741	ENSMUSG00000039838	Slc45a1	solute carrier family 45, member 1
chr4_151083674_151084174	chr4	151083674	151084174	501	*	-1.13124	0.000134984	-0.0287356	Exon (ENSMUST00000169423.8/100072, exon 16 of 25)	4	151089570	151091449	1880	1	105704528	-5396	ENSMUSG00000078491	Gm13090	predicted gene 13090
chr8_83895817_83896317	chr8	83895817	83896317	501	*	-1.13124	0.000134984	-0.0287356	Distal Intergenic	8	83900105	83941954	41850	1	330814	-3788	ENSMUSG00000013033	Adgrl1	adhesion G protein-coupled receptor L1
chr9_106306662_106307162	chr9	106306662	106307162	501	*	-1.13124	0.000134984	-0.0287356	Intron (ENSMUST00000072206.13/70235, intron 8 of 10)	9	106281061	106350521	69461	1	70235	25601	ENSMUSG00000023345	Poc1a	POC1 centriolar protein A
chr14_118180771_118181271	chr14	118180771	118181271	501	*	-1.09115	0.000135199	-0.0298851	Distal Intergenic	14	118137158	118163261	26104	1	58245	43613	ENSMUSG00000022131	Gpr180	G protein-coupled receptor 180
chr2_25180378_25180878	chr2	25180378	25180878	501	*	-1.09115	0.000135199	-0.0298851	Promoter (<=1kb)	2	25180758	25183339	2582	1	67122	0	ENSMUSG00000078202	Nrarp	Notch-regulated ankyrin repeat protein
chr10_119080516_119081016	chr10	119080516	119081016	501	*	-1.48543	0.000145019	-0.0206897	Distal Intergenic	10	119092905	119103107	10203	1	73400	-11889	ENSMUSG00000100681	1700064J06Rik	RIKEN cDNA 1700064J06 gene
chr10_122782669_122783169	chr10	122782669	122783169	501	*	-1.48543	0.000145019	-0.0206897	Intron (ENSMUST00000162853.7/319468, intron 2 of 5)	10	122679315	122679415	101	1	102466884	103354	ENSMUSG00000099225	Mir8104	microRNA 8104
chr11_34881475_34881975	chr11	34881475	34881975	501	*	-1.48543	0.000145019	-0.0206897	Intron (ENSMUST00000131249.1/ENSMUST00000131249.1, intron 1 of 1)	11	34809190	34833641	24452	2	70385	-47834	ENSMUSG00000069910	Spdl1	spindle apparatus coiled-coil protein 1
chr13_30729296_30729796	chr13	30729296	30729796	501	*	-1.48543	0.000145019	-0.0206897	Distal Intergenic	13	30749226	30766976	17751	1	16364	-19430	ENSMUSG00000021356	Irf4	interferon regulatory factor 4
chr14_70578942_70579442	chr14	70578942	70579442	501	*	-1.48543	0.000145019	-0.0206897	Promoter (1-2kb)	14	70577637	70582688	5052	1	213484	1305	ENSMUSG00000045211	Nudt18	nudix (nucleoside diphosphate linked moiety X)-type motif 18
chr18_50053316_50053816	chr18	50053316	50053816	501	*	-1.48543	0.000145019	-0.0206897	Promoter (<=1kb)	18	50042730	50053844	11115	2	102635912	28	NA	C030005K06Rik	RIKEN cDNA C030005K06 gene
chr19_44247268_44247768	chr19	44247268	44247768	501	*	-1.48543	0.000145019	-0.0206897	Distal Intergenic	19	44203269	44244016	40748	1	30049	43999	ENSMUSG00000025202	Scd3	stearoyl-coenzyme A desaturase 3
chr3_153972862_153973362	chr3	153972862	153973362	501	*	-1.48543	0.000145019	-0.0206897	Promoter (<=1kb)	3	153973436	154271722	298287	1	242259	-74	ENSMUSG00000028360	Slc44a5	solute carrier family 44, member 5
chr4_141006654_141007154	chr4	141006654	141007154	501	*	1.48543	0.000145019	0.0206897	3' UTR	4	141010418	141015984	5567	1	17150	-3264	ENSMUSG00000060572	Mfap2	microfibrillar-associated protein 2
chr5_113870763_113871263	chr5	113870763	113871263	501	*	-1.48543	0.000145019	-0.0206897	Intron (ENSMUST00000164980.7/23790, intron 2 of 8)	5	113842436	113908758	66323	2	23790	37495	ENSMUSG00000004530	Coro1c	coronin, actin binding protein 1C
chr5_135995165_135995665	chr5	135995165	135995665	501	*	-1.48543	0.000145019	-0.0206897	Promoter (<=1kb)	5	135994800	136032872	38073	1	74198	365	ENSMUSG00000004947	Dtx2	deltex 2, E3 ubiquitin ligase
chr7_67485331_67485831	chr7	67485331	67485831	501	*	-1.48543	0.000145019	-0.0206897	Distal Intergenic	7	67231163	67372858	141696	2	17258	-112473	ENSMUSG00000030557	Mef2a	myocyte enhancer factor 2A
chrX_74425187_74425687	chrX	74425187	74425687	501	*	-1.48543	0.000145019	-0.0206897	Intron (ENSMUST00000144947.7/16151, intron 1 of 3)	20	74409483	74429194	19712	2	14381	3507	ENSMUSG00000031400	G6pdx	glucose-6-phosphate dehydrogenase X-linked
chr14_57535551_57536051	chr14	57535551	57536051	501	*	-1.24793	0.000159981	-0.0252874	Intron (ENSMUST00000089494.5/239114, intron 2 of 2)	14	57524777	57543166	18390	1	239114	10774	ENSMUSG00000050222	Il17d	interleukin 17D
chr16_18407908_18408408	chr16	18407908	18408408	501	*	1.24793	0.000159981	0.0252874	Exon (ENSMUST00000165430.7/12846, exon 5 of 5)	16	18426384	18479073	52690	1	26462	-17976	ENSMUSG00000075704	Txnrd2	thioredoxin reductase 2
chr16_31457469_31457969	chr16	31457469	31457969	501	*	-1.24793	0.000159981	-0.0252874	3' UTR	16	31427876	31429776	1901	2	100047123	-27693	ENSMUSG00000086645	Gm15743	predicted gene 15743
chr18_15917703_15918203	chr18	15917703	15918203	501	*	-1.24793	0.000159981	-0.0252874	Distal Intergenic	18	15451924	15760157	308234	2	71367	-157546	ENSMUSG00000047161	Chst9	carbohydrate (N-acetylgalactosamine 4-0) sulfotransferase 9
chr2_32608393_32608893	chr2	32608393	32608893	501	*	-1.24793	0.000159981	-0.0252874	5' UTR	2	32599709	32620806	21098	1	50935	8684	ENSMUSG00000026811	St6galnac6	ST6 (alpha-N-acetyl-neuraminyl-2,3-beta-galactosyl-1,3)-N-acetylgalactosaminide alpha-2,6-sialyltransferase 6
chr2_122765119_122765619	chr2	122765119	122765619	501	*	-1.24793	0.000159981	-0.0252874	Promoter (<=1kb)	2	122765237	122809569	44333	1	59010	0	ENSMUSG00000005803	Sqor	sulfide quinone oxidoreductase
chr2_145292829_145293329	chr2	145292829	145293329	501	*	-1.24793	0.000159981	-0.0252874	Intron (ENSMUST00000110007.7/94249, intron 2 of 16)	2	145167754	145642166	474413	1	94249	125075	ENSMUSG00000063873	Slc24a3	solute carrier family 24 (sodium/potassium/calcium exchanger), member 3
chr4_45409277_45409777	chr4	45409277	45409777	501	*	-1.24793	0.000159981	-0.0252874	Promoter (<=1kb)	4	45395923	45408766	12844	2	230125	-511	ENSMUSG00000045973	Slc25a51	solute carrier family 25, member 51
chr4_62561201_62561701	chr4	62561201	62561701	501	*	-1.24793	0.000159981	-0.0252874	Promoter (1-2kb)	4	62559847	62704001	144155	1	50780	1354	ENSMUSG00000059810	Rgs3	regulator of G-protein signaling 3
chr5_136790839_136791339	chr5	136790839	136791339	501	*	-1.24793	0.000159981	-0.0252874	Intron (ENSMUST00000057497.12/140709, intron 3 of 12)	5	136741759	136883209	141451	2	140709	91870	ENSMUSG00000004415	Col26a1	collagen, type XXVI, alpha 1
chr7_44385648_44386148	chr7	44385648	44386148	501	*	-1.24793	0.000159981	-0.0252874	Promoter (<=1kb)	7	44360043	44385684	25642	2	69349	0	ENSMUSG00000008028	1700008O03Rik	RIKEN cDNA 1700008O03 gene
chr7_126031607_126032107	chr7	126031607	126032107	501	*	-1.24793	0.000159981	-0.0252874	Intron (ENSMUST00000073935.6/269994, intron 1 of 6)	7	125878420	126082411	203992	2	269994	50304	ENSMUSG00000046182	Gsg1l	GSG1-like
chr6_99693352_99693852	chr6	99693352	99693852	501	*	-1	0.000165637	-0.0321839	Promoter (<=1kb)	6	99692679	99695066	2388	1	14761	673	ENSMUSG00000072875	Gpr27	G protein-coupled receptor 27
chr8_83651714_83652214	chr8	83651714	83652214	501	*	-1	0.000165637	-0.0321839	Promoter (<=1kb)	8	83652677	83664694	12018	1	67903	-463	ENSMUSG00000019433	Gipc1	GIPC PDZ domain containing family, member 1
chr1_157536415_157536915	chr1	157536415	157536915	501	*	-1.34395	0.000172494	-0.0229885	Intron (ENSMUST00000086130.8/89867, intron 10 of 27)	1	157497931	157511721	13791	2	102632813	-24694	ENSMUSG00000087093	Gm15486	predicted gene 15486
chr10_79718991_79719491	chr10	79718991	79719491	501	*	-1.53051	0.000172494	-0.0195402	Promoter (2-3kb)	10	79716634	79736108	19475	1	15166	2357	ENSMUSG00000020331	Hcn2	hyperpolarization-activated, cyclic nucleotide-gated K+ 2
chr12_103306683_103307183	chr12	103306683	103307183	501	*	-1.53051	0.000172494	-0.0195402	Distal Intergenic	12	103310975	103317065	6091	1	100504156	-3792	ENSMUSG00000096753	Fam181a	family with sequence similarity 181, member A
chr15_76765670_76766170	chr15	76765670	76766170	501	*	-1.53051	0.000172494	-0.0195402	5' UTR	15	76721465	76723845	2381	2	223665	-41825	ENSMUSG00000116138	C030006K11Rik	RIKEN cDNA C030006K11 gene
chr16_95983575_95984075	chr16	95983575	95984075	501	*	1.53051	0.000172494	0.0195402	3' UTR	16	95979933	95990960	11028	2	56088	6885	ENSMUSG00000022913	Psmg1	proteasome (prosome, macropain) assembly chaperone 1
chr17_57250344_57250844	chr17	57250344	57250844	501	*	-1.53051	0.000172494	-0.0195402	Promoter (<=1kb)	17	57249455	57263665	14211	1	106628	889	ENSMUSG00000019487	Trip10	thyroid hormone receptor interactor 10
chr18_61491568_61492068	chr18	61491568	61492068	501	*	-1.34395	0.000172494	-0.0229885	3' UTR	18	61470225	61484607	14383	2	442846	-6961	ENSMUSG00000118229	Lncbate10	brown adipose tissue enriched long noncoding RNA 10
chr19_23373260_23373760	chr19	23373260	23373760	501	*	-1.34395	0.000172494	-0.0229885	Intron (ENSMUST00000036069.7/71738, intron 5 of 13)	19	23302609	23448442	145834	2	71738	74682	ENSMUSG00000033207	Mamdc2	MAM domain containing 2
chr19_41071489_41071989	chr19	41071489	41071989	501	*	-1.34395	0.000172494	-0.0229885	Intron (ENSMUST00000087176.7/226115, intron 2 of 5)	19	41061710	41077113	15404	2	226115	5124	ENSMUSG00000050121	Opalin	oligodendrocytic myelin paranodal and inner loop protein
chr2_152197142_152197642	chr2	152197142	152197642	501	*	-1.34395	0.000172494	-0.0229885	Distal Intergenic	2	152226839	152281852	55014	1	12995	-29197	ENSMUSG00000074698	Csnk2a1	casein kinase 2, alpha 1 polypeptide
chr3_45297571_45298071	chr3	45297571	45298071	501	*	-1.53051	0.000172494	-0.0195402	Intron (ENSMUST00000181047.6/72511, intron 6 of 8)	3	45280437	45378260	97824	2	72511	80189	ENSMUSG00000097040	2610316D01Rik	RIKEN cDNA 2610316D01 gene
chr3_89650941_89651441	chr3	89650941	89651441	501	*	-1.53051	0.000172494	-0.0195402	Intron (ENSMUST00000000811.7/140493, intron 4 of 7)	3	89715022	89753446	38425	1	56417	-63581	ENSMUSG00000027951	Adar	adenosine deaminase, RNA-specific
chr3_152831945_152832445	chr3	152831945	152832445	501	*	-1.34395	0.000172494	-0.0229885	Intron (ENSMUST00000162642.7/329777, intron 12 of 13)	3	152714100	152980408	266309	1	329777	117845	ENSMUSG00000039047	Pigk	phosphatidylinositol glycan anchor biosynthesis, class K
chr4_69849600_69850100	chr4	69849600	69850100	501	*	-1.53051	0.000172494	-0.0195402	Distal Intergenic	4	70216856	70410443	193588	2	214444	560343	ENSMUSG00000039298	Cdk5rap2	CDK5 regulatory subunit associated protein 2
chr4_148869491_148869991	chr4	148869491	148869991	501	*	-1.34395	0.000172494	-0.0229885	Intron (ENSMUST00000094464.9/69743, intron 2 of 15)	4	148804429	148954889	150461	1	69743	65062	ENSMUSG00000028977	Casz1	castor zinc finger 1
chr5_124853294_124853794	chr5	124853294	124853794	501	*	-1.53051	0.000172494	-0.0195402	Intron (ENSMUST00000036206.13/215707, intron 1 of 3)	5	124834418	124862424	28007	2	215707	8630	ENSMUSG00000037979	Ccdc92	coiled-coil domain containing 92
chr6_28923753_28924253	chr6	28923753	28924253	501	*	-1.53051	0.000172494	-0.0195402	Intron (ENSMUST00000167201.1/56463, intron 16 of 16)	6	28828133	28831747	3615	2	192198	-92006	ENSMUSG00000049939	Lrrc4	leucine rich repeat containing 4
chr6_31502502_31503002	chr6	31502502	31503002	501	*	-1.53051	0.000172494	-0.0195402	Intron (ENSMUST00000026699.14/27418, intron 17 of 17)	6	31519488	31563981	44494	2	27205	60979	ENSMUSG00000025608	Podxl	podocalyxin-like
chr6_95202452_95202952	chr6	95202452	95202952	501	*	-1.34395	0.000172494	-0.0229885	Distal Intergenic	6	95114017	95117631	3615	2	102634268	-84821	ENSMUSG00000085413	Kbtbd8os	kelch repeat and BTB (POZ) domain containing 8, opposite strand
chr7_51831787_51832287	chr7	51831787	51832287	501	*	-1.34395	0.000172494	-0.0229885	Distal Intergenic	7	51862015	51994975	132961	1	14453	-29728	ENSMUSG00000030498	Gas2	growth arrest specific 2
chr7_126697411_126697911	chr7	126697411	126697911	501	*	-1.53051	0.000172494	-0.0195402	Promoter (1-2kb)	7	126689468	126695784	6317	2	75764	-1627	ENSMUSG00000059772	Slx1b	SLX1 structure-specific endonuclease subunit homolog B (S. cerevisiae)
chr7_127343769_127344269	chr7	127343769	127344269	501	*	-1.53051	0.000172494	-0.0195402	Promoter (1-2kb)	7	127342795	127345589	2795	2	233890	1320	ENSMUSG00000047371	Zfp768	zinc finger protein 768
chr9_61830217_61830717	chr9	61830217	61830717	501	*	-1.53051	0.000172494	-0.0195402	Distal Intergenic	9	61913284	61914542	1259	2	56040	83825	ENSMUSG00000007892	Rplp1	ribosomal protein, large, P1
chr1_36663867_36664367	chr1	36663867	36664367	501	*	-3.32193	0.000173168	-0.0103448	Exon (ENSMUST00000104746.1/ENSMUST00000104746.1, exon 1 of 1)	1	36562692	36683183	120492	2	381337	18816	ENSMUSG00000046337	Fam178b	family with sequence similarity 178, member B
chr1_73926218_73926718	chr1	73926218	73926718	501	*	-2.32193	0.000173168	-0.0091954	Intron (ENSMUST00000169786.7/21961, intron 25 of 34)	1	73618088	73864466	246379	2	109198	-61752	ENSMUSG00000100301	6030407O03Rik	RIKEN cDNA 6030407O03 gene
chr1_92903030_92903530	chr1	92903030	92903530	501	*	-1.848	0.000173168	-0.0149425	Promoter (<=1kb)	1	92859803	92902906	43104	2	241158	-124	ENSMUSG00000034212	Ankmy1	ankyrin repeat and MYND domain containing 1
chr1_106369005_106369505	chr1	106369005	106369505	501	*	2.32193	0.000173168	0.0091954	Exon (ENSMUST00000061047.6/98432, exon 12 of 17)	1	106546496	106546631	136	2	102466254	177126	ENSMUSG00000098344	Mir3473f	microRNA 3473f
chr1_128279802_128280302	chr1	128279802	128280302	501	*	2.32193	0.000173168	0.0091954	Distal Intergenic	1	128243964	128279378	35415	1	67812	35838	ENSMUSG00000026353	Ubxn4	UBX domain protein 4
chr1_153910996_153911496	chr1	153910996	153911496	501	*	2.32193	0.000173168	0.0091954	Distal Intergenic	1	153899944	153909723	9780	1	14645	11052	ENSMUSG00000026473	Glul	glutamate-ammonia ligase (glutamine synthetase)
chr1_179466158_179466658	chr1	179466158	179466658	501	*	3.32193	0.000173168	0.0103448	Intron (ENSMUST00000128302.7/69726, intron 1 of 11)	1	178951960	179518041	566082	2	69726	51383	ENSMUSG00000055067	Smyd3	SET and MYND domain containing 3
chr10_3693880_3694380	chr10	3693880	3694380	501	*	-2.32193	0.000173168	-0.0091954	Distal Intergenic	10	3740364	3967303	226940	1	213783	-45984	ENSMUSG00000040624	Plekhg1	pleckstrin homology domain containing, family G (with RhoGef domain) member 1
chr10_3715601_3716101	chr10	3715601	3716101	501	*	-2.32193	0.000173168	-0.0091954	Distal Intergenic	10	3740364	3967303	226940	1	213783	-24263	ENSMUSG00000040624	Plekhg1	pleckstrin homology domain containing, family G (with RhoGef domain) member 1
chr10_39674767_39675267	chr10	39674767	39675267	501	*	-2.32193	0.000173168	-0.0091954	Intron (ENSMUST00000129191.7/327744, intron 1 of 3)	10	39621412	39732007	110596	2	327744	56740	ENSMUSG00000087177	E130307A14Rik	RIKEN cDNA E130307A14 gene
chr10_52423592_52424092	chr10	52423592	52424092	501	*	-2.32193	0.000173168	-0.0091954	Intron (ENSMUST00000023830.15/52014, intron 1 of 4)	10	52417547	52440183	22637	1	52014	6045	ENSMUSG00000023068	Nus1	NUS1 dehydrodolichyl diphosphate synthase subunit
chr10_68030658_68031158	chr10	68030658	68031158	501	*	2.32193	0.000173168	0.0091954	Intron (ENSMUST00000118160.7/170799, intron 9 of 11)	10	67979570	68059740	80171	1	170799	51088	ENSMUSG00000037846	Rtkn2	rhotekin 2
chr10_70315555_70316055	chr10	70315555	70316055	501	*	-1.02748	0.000173168	-0.0310345	Distal Intergenic	10	70245100	70285968	40869	1	66859	70455	ENSMUSG00000037762	Slc16a9	solute carrier family 16 (monocarboxylic acid transporters), member 9
chr10_70581863_70582363	chr10	70581863	70582363	501	*	-2.32193	0.000173168	-0.0091954	Intron (ENSMUST00000046513.9/70911, intron 1 of 4)	10	70557682	70655958	98277	2	70911	73595	ENSMUSG00000037747	Phyhipl	phytanoyl-CoA hydroxylase interacting protein-like
chr10_76324468_76324968	chr10	76324468	76324968	501	*	-2.32193	0.000173168	-0.0091954	Intron (ENSMUST00000160048.7/64451, intron 2 of 36)	10	76259429	76345291	85863	2	64451	20323	ENSMUSG00000020231	Dip2a	disco interacting protein 2 homolog A
chr10_78440795_78441295	chr10	78440795	78441295	501	*	-1.18763	0.000173168	-0.0264368	3' UTR	10	78445095	78445157	63	2	102466762	3862	ENSMUSG00000098279	Mir6908	microRNA 6908
chr10_83110549_83111049	chr10	83110549	83111049	501	*	-2.32193	0.000173168	-0.0091954	Intron (ENSMUST00000040110.7/58250, intron 2 of 2)	10	82985498	83195900	210403	1	58250	125051	ENSMUSG00000034612	Chst11	carbohydrate sulfotransferase 11
chr10_91979813_91980313	chr10	91979813	91980313	501	*	-1.848	0.000173168	-0.0149425	Distal Intergenic	10	91888829	91953580	64752	1	102633867	90984	ENSMUSG00000111657	Gm31592	predicted gene, 31592
chr10_110357431_110357931	chr10	110357431	110357931	501	*	-2.32193	0.000173168	-0.0091954	Intron (ENSMUST00000160159.2/260315, intron 1 of 4)	10	109681259	110456204	774946	2	260315	98273	ENSMUSG00000020181	Nav3	neuron navigator 3
chr10_115358279_115358779	chr10	115358279	115358779	501	*	2.32193	0.000173168	0.0091954	Intron (ENSMUST00000218731.1/67226, intron 3 of 7)	10	115339674	115362501	22828	2	67226	3722	ENSMUSG00000069520	Tmem19	transmembrane protein 19
chr10_123023381_123023881	chr10	123023381	123023881	501	*	-3.32193	0.000173168	-0.0103448	Intron (ENSMUST00000073792.10/67074, intron 20 of 35)	10	122985074	122985831	758	2	387251	-37550	ENSMUSG00000065406	Mirlet7i	microRNA let7i
chr11_23678554_23679054	chr11	23678554	23679054	501	*	-1.848	0.000173168	-0.0149425	Intron (ENSMUST00000109525.7/74467, intron 4 of 17)	11	23646479	23665959	19481	2	72129	-12595	ENSMUSG00000020283	Pex13	peroxisomal biogenesis factor 13
chr11_61551456_61551956	chr11	61551456	61551956	501	*	-2.32193	0.000173168	-0.0091954	Intron (ENSMUST00000108711.7/13855, intron 1 of 9)	11	61517249	61579687	62439	2	13855	27731	ENSMUSG00000001036	Epn2	epsin 2
chr11_71782755_71783255	chr11	71782755	71783255	501	*	-3.32193	0.000173168	-0.0103448	Intron (ENSMUST00000021168.13/216881, intron 5 of 8)	11	71749920	71789647	39728	1	216881	32835	ENSMUSG00000020811	Wscd1	WSC domain containing 1
chr11_77070645_77071145	chr11	77070645	77071145	501	*	-2.32193	0.000173168	-0.0091954	Intron (ENSMUST00000102494.7/237859, intron 2 of 6)	11	77078064	77078172	109	2	751519	7027	ENSMUSG00000065518	Mir423	microRNA 423
chr11_88657008_88657508	chr11	88657008	88657508	501	*	-1.848	0.000173168	-0.0149425	Intron (ENSMUST00000107909.7/76626, intron 5 of 13)	11	88339382	88718513	379132	2	76626	61005	ENSMUSG00000069769	Msi2	musashi RNA-binding protein 2
chr11_103997324_103997824	chr11	103997324	103997824	501	*	-1.18763	0.000173168	-0.0264368	Distal Intergenic	11	103966739	103985337	18599	1	11841	30585	ENSMUSG00000062421	Arf2	ADP-ribosylation factor 2
chr11_106391767_106392267	chr11	106391767	106392267	501	*	-1.18763	0.000173168	-0.0264368	Downstream (2-3kb)	11	106377656	106388075	10420	2	15896	-3692	ENSMUSG00000001029	Icam2	intercellular adhesion molecule 2
chr11_117959915_117960415	chr11	117959915	117960415	501	*	-2.32193	0.000173168	-0.0091954	Distal Intergenic	11	117966079	117969186	3108	2	12702	8771	ENSMUSG00000053113	Socs3	suppressor of cytokine signaling 3
chr12_4405188_4405688	chr12	4405188	4405688	501	*	-2.32193	0.000173168	-0.0091954	Intron (ENSMUST00000085814.4/17977, intron 2 of 22)	12	4247362	4477182	229821	2	17977	71494	ENSMUSG00000020647	Ncoa1	nuclear receptor coactivator 1
chr12_31968521_31969021	chr12	31968521	31969021	501	*	2.32193	0.000173168	0.0091954	Intron (ENSMUST00000003079.11/19088, intron 6 of 11)	12	31926254	31950535	24282	2	73389	-17986	ENSMUSG00000002996	Hbp1	high mobility group box transcription factor 1
chr12_44524775_44525275	chr12	44524775	44525275	501	*	1.848	0.000173168	0.0149425	Intron (ENSMUST00000110748.3/319504, intron 3 of 27)	12	44328885	44601964	273080	1	319504	195890	ENSMUSG00000020598	Nrcam	neuronal cell adhesion molecule
chr12_86720303_86720803	chr12	86720303	86720803	501	*	2.32193	0.000173168	0.0091954	Exon (ENSMUST00000021682.8/68737, exon 5 of 10)	12	86700502	86726460	25959	2	68737	5657	ENSMUSG00000021257	Angel1	angel homolog 1
chr12_99294735_99295235	chr12	99294735	99295235	501	*	2.32193	0.000173168	0.0091954	Exon (ENSMUST00000176552.1/ENSMUST00000176552.1, exon 2 of 2)	12	99161277	99162808	1532	2	67639	-131927	ENSMUSG00000113210	4930474N09Rik	RIKEN cDNA 4930474N09 gene
chr12_99379100_99379600	chr12	99379100	99379600	501	*	-2.32193	0.000173168	-0.0091954	Intron (ENSMUST00000046859.11/71375, intron 2 of 5)	12	99190078	99563536	373459	2	71375	183936	ENSMUSG00000033713	Foxn3	forkhead box N3
chr13_31956518_31957018	chr13	31956518	31957018	501	*	-2.32193	0.000173168	-0.0091954	Intron (ENSMUST00000041859.8/218138, intron 7 of 10)	13	31806633	31812476	5844	1	17300	149885	ENSMUSG00000050295	Foxc1	forkhead box C1
chr13_60225975_60226475	chr13	60225975	60226475	501	*	-3.32193	0.000173168	-0.0103448	Distal Intergenic	13	60205471	60216023	10553	1	100503759	20504	ENSMUSG00000050765	Gm5084	predicted gene 5084
chr13_94195856_94196356	chr13	94195856	94196356	501	*	-2.32193	0.000173168	-0.0091954	Distal Intergenic	13	94201310	94285857	84548	2	107767	89501	ENSMUSG00000021687	Scamp1	secretory carrier membrane protein 1
chr13_97167505_97168005	chr13	97167505	97168005	501	*	-3.32193	0.000173168	-0.0103448	Intron (ENSMUST00000042084.12/320806, intron 14 of 19)	13	97129424	97137937	8514	2	59050	-29568	ENSMUSG00000060739	Nsa2	NSA2 ribosome biogenesis homolog
chr13_97186028_97186528	chr13	97186028	97186528	501	*	2.32193	0.000173168	0.0091954	Intron (ENSMUST00000022169.9/15212, intron 5 of 13)	13	97176331	97198357	22027	2	15212	11829	ENSMUSG00000021665	Hexb	hexosaminidase B
chr14_48138053_48138553	chr14	48138053	48138553	501	*	-1.848	0.000173168	-0.0149425	Intron (ENSMUST00000073150.5/93834, intron 1 of 5)	14	48120823	48281575	160753	1	93834	17230	ENSMUSG00000021846	Peli2	pellino 2
chr14_70329924_70330424	chr14	70329924	70330424	501	*	1.848	0.000173168	0.0149425	Intron (ENSMUST00000068044.13/213053, intron 2 of 9)	14	70303469	70351425	47957	2	213053	21001	ENSMUSG00000022094	Slc39a14	solute carrier family 39 (zinc transporter), member 14
chr14_70902360_70902860	chr14	70902360	70902860	501	*	2.32193	0.000173168	0.0091954	Intron (ENSMUST00000022699.9/14586, intron 3 of 8)	14	70890120	70979838	89719	1	14586	12240	ENSMUSG00000022103	Gfra2	glial cell line derived neurotrophic factor family receptor alpha 2
chr14_73132703_73133203	chr14	73132703	73133203	501	*	-3.32193	0.000173168	-0.0103448	Intron (ENSMUST00000163339.7/105670, intron 1 of 6)	14	73123037	73207843	84807	1	105670	9666	ENSMUSG00000022106	Rcbtb2	regulator of chromosome condensation (RCC1) and BTB (POZ) domain containing protein 2
chr14_101951220_101951720	chr14	101951220	101951720	501	*	-3.32193	0.000173168	-0.0103448	Distal Intergenic	14	101729957	101934710	204754	1	380928	221263	ENSMUSG00000033060	Lmo7	LIM domain only 7
chr14_120285090_120285590	chr14	120285090	120285590	501	*	2.32193	0.000173168	0.0091954	Intron (ENSMUST00000088419.12/105559, intron 1 of 8)	14	120275669	120431697	156029	1	105559	9421	ENSMUSG00000022139	Mbnl2	muscleblind like splicing factor 2
chr15_58199475_58199975	chr15	58199475	58199975	501	*	-2.32193	0.000173168	-0.0091954	Intron (ENSMUST00000022986.7/67731, intron 4 of 8)	15	58175879	58214932	39054	2	67731	14957	ENSMUSG00000022358	Fbxo32	F-box protein 32
chr15_73461420_73461920	chr15	73461420	73461920	501	*	2.32193	0.000173168	0.0091954	Distal Intergenic	15	73205102	73423280	218179	2	14083	-38140	ENSMUSG00000022607	Ptk2	PTK2 protein tyrosine kinase 2
chr15_76125250_76125750	chr15	76125250	76125750	501	*	-2.32193	0.000173168	-0.0091954	Promoter (<=1kb)	15	76119517	76126596	7080	2	271278	846	ENSMUSG00000044361	BC024139	cDNA sequence BC024139
chr15_76690273_76690773	chr15	76690273	76690773	501	*	-2.32193	0.000173168	-0.0091954	5' UTR	15	76695716	76699686	3971	1	76282	-4943	ENSMUSG00000022546	Gpt	glutamic pyruvic transaminase, soluble
chr15_79104062_79104562	chr15	79104062	79104562	501	*	-3.32193	0.000173168	-0.0103448	Distal Intergenic	15	79108898	79136900	28003	1	27008	-4336	ENSMUSG00000033039	Micall1	microtubule associated monooxygenase, calponin and LIM domain containing -like 1
chr15_79924565_79925065	chr15	79924565	79925065	501	*	-2.32193	0.000173168	-0.0091954	Intron (ENSMUST00000109616.8/52609, intron 2 of 6)	15	79891659	79915906	24248	1	80287	32906	ENSMUSG00000009585	Apobec3	apolipoprotein B mRNA editing enzyme, catalytic polypeptide 3
chr15_100686331_100686831	chr15	100686331	100686831	501	*	-2.32193	0.000173168	-0.0091954	Promoter (1-2kb)	15	100674421	100687921	13501	2	109901	1090	ENSMUSG00000023031	Cela1	chymotrypsin-like elastase family, member 1
chr16_28638568_28639068	chr16	28638568	28639068	501	*	-3.32193	0.000173168	-0.0103448	Intron (ENSMUST00000232352.1/14167, intron 1 of 4)	16	28599935	28600043	109	2	751543	-38525	ENSMUSG00000076064	Mir690	microRNA 690
chr16_30703978_30704478	chr16	30703978	30704478	501	*	-2.32193	0.000173168	-0.0091954	Distal Intergenic	16	30599723	30602797	3075	1	224093	104255	ENSMUSG00000046546	Fam43a	family with sequence similarity 43, member A
chr16_31119223_31119723	chr16	31119223	31119723	501	*	2.32193	0.000173168	0.0091954	3' UTR	16	30955144	31081432	126289	2	268880	-37791	ENSMUSG00000047434	Xxylt1	xyloside xylosyltransferase 1
chr16_96342608_96343108	chr16	96342608	96343108	501	*	-2.32193	0.000173168	-0.0091954	Distal Intergenic	16	96361668	96525580	163913	1	72058	-18560	ENSMUSG00000000159	Igsf5	immunoglobulin superfamily, member 5
chr17_5999782_6000282	chr17	5999782	6000282	501	*	-2.32193	0.000173168	-0.0091954	Intron (ENSMUST00000115791.9/20975, intron 5 of 26)	17	5941280	6044290	103011	1	20975	58502	ENSMUSG00000023805	Synj2	synaptojanin 2
chr17_6150441_6150941	chr17	6150441	6150941	501	*	-3.32193	0.000173168	-0.0103448	Intron (ENSMUST00000142030.7/68842, intron 1 of 5)	17	6106479	6251128	144650	1	68842	43962	ENSMUSG00000034377	Tulp4	tubby like protein 4
chr17_10447114_10447614	chr17	10447114	10447614	501	*	3.32193	0.000173168	0.0103448	Intron (ENSMUST00000041463.6/69310, intron 4 of 4)	17	10456216	10493057	36842	1	319750	-8602	ENSMUSG00000089633	A230009B12Rik	RIKEN cDNA A230009B12 gene
chr17_35170497_35170997	chr17	35170497	35170997	501	*	-2.32193	0.000173168	-0.0091954	3' UTR	17	35170991	35176068	5078	2	11629	5071	ENSMUSG00000024397	Aif1	allograft inflammatory factor 1
chr17_46505375_46505875	chr17	46505375	46505875	501	*	-2.32193	0.000173168	-0.0091954	Intron (ENSMUST00000066026.7/78309, intron 31 of 41)	17	46496711	46499624	2914	1	381101	8664	ENSMUSG00000040658	Dnph1	2'-deoxynucleoside 5'-phosphate N-hydrolase 1
chr17_47730900_47731400	chr17	47730900	47731400	501	*	-2.32193	0.000173168	-0.0091954	Intron (ENSMUST00000024782.11/109820, intron 5 of 8)	17	47726842	47734482	7641	1	109820	4058	ENSMUSG00000023987	Pgc	progastricsin (pepsinogen C)
chr18_57369198_57369698	chr18	57369198	57369698	501	*	-3.32193	0.000173168	-0.0103448	Intron (ENSMUST00000025490.9/73137, intron 4 of 8)	18	57354741	57392956	38216	1	73137	14457	ENSMUSG00000024594	Prrc1	proline-rich coiled-coil 1
chr18_68234914_68235414	chr18	68234914	68235414	501	*	-1.848	0.000173168	-0.0149425	Intron (ENSMUST00000063775.4/52662, intron 3 of 5)	18	68260920	68260973	54	2	102465702	25559	ENSMUSG00000098253	Mir7219	microRNA 7219
chr19_4017105_4017605	chr19	4017105	4017605	501	*	-3.32193	0.000173168	-0.0103448	Distal Intergenic	19	4007384	4012806	5423	2	17995	-4299	ENSMUSG00000037916	Ndufv1	NADH:ubiquinone oxidoreductase core subunit V1
chr19_4051894_4052394	chr19	4051894	4052394	501	*	-2.32193	0.000173168	-0.0091954	Distal Intergenic	19	4040285	4046023	5739	2	14869	-5871	ENSMUSG00000038155	Gstp2	glutathione S-transferase, pi 2
chr19_4166123_4166623	chr19	4166123	4166623	501	*	-1.848	0.000173168	-0.0149425	Promoter (2-3kb)	19	4153991	4163354	9364	2	58988	-2769	ENSMUSG00000024830	Rps6kb2	ribosomal protein S6 kinase, polypeptide 2
chr19_5937483_5937983	chr19	5937483	5937983	501	*	2.32193	0.000173168	0.0091954	Downstream (2-3kb)	19	5915636	5924816	9181	2	104252	-12667	ENSMUSG00000045664	Cdc42ep2	CDC42 effector protein (Rho GTPase binding) 2
chr19_44244591_44245091	chr19	44244591	44245091	501	*	-2.32193	0.000173168	-0.0091954	Intron (ENSMUST00000236516.1/ENSMUST00000236516.1, intron 1 of 1)	19	44203269	44244016	40748	1	30049	41322	ENSMUSG00000025202	Scd3	stearoyl-coenzyme A desaturase 3
chr19_45833858_45834358	chr19	45833858	45834358	501	*	-2.32193	0.000173168	-0.0091954	Intron (ENSMUST00000045396.8/71617, intron 24 of 25)	19	45791839	45816061	24223	2	80906	-17797	ENSMUSG00000025221	Kcnip2	Kv channel-interacting protein 2
chr19_48522064_48522564	chr19	48522064	48522564	501	*	-2.32193	0.000173168	-0.0091954	Intron (ENSMUST00000078880.5/66673, intron 3 of 26)	19	48206025	48805505	599481	1	66673	316039	ENSMUSG00000063434	Sorcs3	sortilin-related VPS10 domain containing receptor 3
chr2_26309842_26310342	chr2	26309842	26310342	501	*	-2.32193	0.000173168	-0.0091954	Distal Intergenic	2	26315515	26348237	32723	1	67839	-5173	ENSMUSG00000026930	Gpsm1	G-protein signalling modulator 1 (AGS3-like, C. elegans)
chr2_48814594_48815094	chr2	48814594	48815094	501	*	-1.02748	0.000173168	-0.0310345	Promoter (<=1kb)	2	48814109	48903269	89161	1	11480	485	ENSMUSG00000052155	Acvr2a	activin receptor IIA
chr2_118554496_118554996	chr2	118554496	118554996	501	*	-1.848	0.000173168	-0.0149425	Distal Intergenic	2	118528757	118549687	20931	2	171543	-4809	ENSMUSG00000040093	Bmf	BCL2 modifying factor
chr2_127656554_127657054	chr2	127656554	127657054	501	*	-3.32193	0.000173168	-0.0103448	Promoter (<=1kb)	2	127633226	127656695	23470	2	17153	0	ENSMUSG00000027375	Mal	myelin and lymphocyte protein, T cell differentiation protein
chr2_157040931_157041431	chr2	157040931	157041431	501	*	-1.848	0.000173168	-0.0149425	Exon (ENSMUST00000069098.6/320706, exon 5 of 15)	2	156995265	157007154	11890	2	66934	-33777	ENSMUSG00000027635	Dsn1	DSN1 homolog, MIS12 kinetochore complex component
chr2_157299935_157300435	chr2	157299935	157300435	501	*	-2.32193	0.000173168	-0.0091954	Intron (ENSMUST00000116380.8/20014, intron 8 of 16)	2	157208550	157279549	71000	2	629499	-20386	ENSMUSG00000074627	Mroh8	maestro heat-like repeat family member 8
chr2_168725242_168725742	chr2	168725242	168725742	501	*	2.32193	0.000173168	0.0091954	Intron (ENSMUST00000109175.8/11981, intron 1 of 27)	2	168634438	168742409	107972	2	11981	16667	ENSMUSG00000027546	Atp9a	ATPase, class II, type 9A
chr2_170421850_170422350	chr2	170421850	170422350	501	*	-2.32193	0.000173168	-0.0091954	Intron (ENSMUST00000109152.8/76960, intron 1 of 11)	2	170346991	170427845	80855	2	76960	5495	ENSMUSG00000013523	Bcas1	breast carcinoma amplified sequence 1
chr2_172828884_172829384	chr2	172828884	172829384	501	*	-2.32193	0.000173168	-0.0091954	Distal Intergenic	2	172868012	172940321	72310	2	12162	110937	ENSMUSG00000008999	Bmp7	bone morphogenetic protein 7
chr3_89234429_89234929	chr3	89234429	89234929	501	*	-1.848	0.000173168	-0.0149425	3' UTR	3	89229057	89233381	4325	1	17829	5372	ENSMUSG00000042784	Muc1	mucin 1, transmembrane
chr3_95153811_95154311	chr3	95153811	95154311	501	*	-2.32193	0.000173168	-0.0091954	Distal Intergenic	3	95160457	95174024	13568	1	20360	-6146	ENSMUSG00000038777	Sema6c	sema domain, transmembrane domain (TM), and cytoplasmic domain, (semaphorin) 6C
chr3_95312571_95313071	chr3	95312571	95313071	501	*	-2.32193	0.000173168	-0.0091954	Promoter (1-2kb)	3	95314791	95323599	8809	1	76893	-1720	ENSMUSG00000015714	Cers2	ceramide synthase 2
chr3_95590276_95590776	chr3	95590276	95590776	501	*	-2.32193	0.000173168	-0.0091954	Promoter (1-2kb)	3	95588934	95619247	30314	1	229593	1342	ENSMUSG00000046519	Golph3l	golgi phosphoprotein 3-like
chr3_98335795_98336295	chr3	98335795	98336295	501	*	-2.32193	0.000173168	-0.0091954	Intron (ENSMUST00000065793.11/236539, intron 1 of 11)	3	98313170	98339990	26821	2	236539	3695	ENSMUSG00000053398	Phgdh	3-phosphoglycerate dehydrogenase
chr3_104781995_104782495	chr3	104781995	104782495	501	*	-1.848	0.000173168	-0.0149425	Promoter (<=1kb)	3	104781056	104786018	4963	1	71887	939	ENSMUSG00000002228	Ppm1j	protein phosphatase 1J
chr3_107787216_107787716	chr3	107787216	107787716	501	*	-2.32193	0.000173168	-0.0091954	Distal Intergenic	3	107741048	107760469	19422	2	12977	-26747	ENSMUSG00000014599	Csf1	colony stimulating factor 1 (macrophage)
chr3_107893212_107893712	chr3	107893212	107893712	501	*	-2.32193	0.000173168	-0.0091954	Promoter (2-3kb)	3	107895821	107898686	2866	1	14866	-2109	ENSMUSG00000004032	Gstm5	glutathione S-transferase, mu 5
chr4_18649115_18649615	chr4	18649115	18649615	501	*	-2.32193	0.000173168	-0.0091954	Intron (ENSMUST00000133363.1/ENSMUST00000133363.1, intron 3 of 10)	4	18860454	19122526	262073	2	435772	472911	ENSMUSG00000073991	Cnbd1	cyclic nucleotide binding domain containing 1
chr4_41635617_41636117	chr4	41635617	41636117	501	*	-1.848	0.000173168	-0.0149425	Intron (ENSMUST00000102963.9/68922, intron 19 of 19)	4	41638144	41640324	2181	2	69638	4207	ENSMUSG00000028445	Enho	energy homeostasis associated
chr4_41678644_41679144	chr4	41678644	41679144	501	*	-1.848	0.000173168	-0.0149425	Intron (ENSMUST00000102961.9/12804, intron 2 of 9)	4	41657498	41697089	39592	2	12804	17945	ENSMUSG00000028444	Cntfr	ciliary neurotrophic factor receptor
chr4_43038022_43038522	chr4	43038022	43038522	501	*	-1.848	0.000173168	-0.0149425	Intron (ENSMUST00000107958.7/230088, intron 1 of 8)	4	43027690	43031710	4021	2	66592	-6312	ENSMUSG00000028455	Stoml2	stomatin (Epb7.2)-like 2
chr4_53508563_53509063	chr4	53508563	53509063	501	*	3.32193	0.000173168	0.0103448	Intron (ENSMUST00000107646.8/100434, intron 3 of 12)	4	53440413	53622478	182066	1	100434	68150	ENSMUSG00000028412	Slc44a1	solute carrier family 44, member 1
chr4_62663191_62663691	chr4	62663191	62663691	501	*	-2.32193	0.000173168	-0.0091954	5' UTR	4	62559847	62704001	144155	1	50780	103344	ENSMUSG00000059810	Rgs3	regulator of G-protein signaling 3
chr4_62805759_62806259	chr4	62805759	62806259	501	*	-1.848	0.000173168	-0.0149425	Distal Intergenic	4	62965573	63139708	174136	1	72701	-159314	ENSMUSG00000028358	Zfp618	zinc finger protein 618
chr4_65496377_65496877	chr4	65496377	65496877	501	*	-1.18763	0.000173168	-0.0264368	Intron (ENSMUST00000084496.2/56079, intron 18 of 21)	4	65604986	65616238	11253	1	69807	-108109	ENSMUSG00000051675	Trim32	tripartite motif-containing 32
chr4_86923666_86924166	chr4	86923666	86924166	501	*	2.32193	0.000173168	0.0091954	Intron (ENSMUST00000128712.1/230379, intron 5 of 5)	4	86874396	86934822	60427	1	230379	49270	ENSMUSG00000038007	Acer2	alkaline ceramidase 2
chr4_105189657_105190157	chr4	105189657	105190157	501	*	-2.32193	0.000173168	-0.0091954	Intron (ENSMUST00000064139.7/67916, intron 1 of 5)	4	105157347	105232764	75418	1	67916	32310	ENSMUSG00000028517	Plpp3	phospholipid phosphatase 3
chr4_108050506_108051006	chr4	108050506	108051006	501	*	-2.32193	0.000173168	-0.0091954	Intron (ENSMUST00000044248.13/242608, intron 1 of 11)	4	108087357	108087449	93	1	102465213	-36351	ENSMUSG00000098980	Mir6397	microRNA 6397
chr4_133871737_133872237	chr4	133871737	133872237	501	*	2.32193	0.000173168	0.0091954	5' UTR	4	133847290	133887797	40508	2	20111	15560	ENSMUSG00000003644	Rps6ka1	ribosomal protein S6 kinase polypeptide 1
chr4_149768977_149769477	chr4	149768977	149769477	501	*	-3.32193	0.000173168	-0.0103448	Intron (ENSMUST00000105686.2/70556, intron 1 of 6)	4	149744036	149774277	30242	2	70556	4800	ENSMUSG00000028982	Slc25a33	solute carrier family 25, member 33
chr5_30105467_30105967	chr5	30105467	30105967	501	*	2.32193	0.000173168	0.0091954	Promoter (<=1kb)	5	30103584	30106086	2503	2	433868	119	ENSMUSG00000086815	3110082J24Rik	RIKEN cDNA 3110082J24 gene
chr5_64040719_64041219	chr5	64040719	64041219	501	*	-3.32193	0.000173168	-0.0103448	Distal Intergenic	5	64044978	64050228	5251	1	74757	-3759	ENSMUSG00000106219	5830416I19Rik	RIKEN cDNA 5830416I19 gene
chr5_134209783_134210283	chr5	134209783	134210283	501	*	-1.848	0.000173168	-0.0149425	Intron (ENSMUST00000123941.7/114674, intron 11 of 18)	5	134220053	134229625	9573	2	17969	19342	ENSMUSG00000015950	Ncf1	neutrophil cytosolic factor 1
chr5_138957569_138958069	chr5	138957569	138958069	501	*	-2.32193	0.000173168	-0.0091954	Distal Intergenic	5	138976014	138997370	21357	2	18590	39301	ENSMUSG00000025856	Pdgfa	platelet derived growth factor, alpha
chr5_140753169_140753669	chr5	140753169	140753669	501	*	-2.32193	0.000173168	-0.0091954	3' UTR	5	140724127	140761439	37313	1	231842	29042	ENSMUSG00000050022	Amz1	archaelysin family metallopeptidase 1
chr5_140802863_140803363	chr5	140802863	140803363	501	*	-2.32193	0.000173168	-0.0091954	Intron (ENSMUST00000000153.8/14673, intron 1 of 3)	5	140758408	140830431	72024	2	14673	27068	ENSMUSG00000000149	Gna12	guanine nucleotide binding protein, alpha 12
chr5_142631392_142631892	chr5	142631392	142631892	501	*	-2.32193	0.000173168	-0.0091954	Promoter (1-2kb)	5	142629542	142670588	41047	1	74781	1850	ENSMUSG00000029578	Wipi2	WD repeat domain, phosphoinositide interacting 2
chr5_145222792_145223292	chr5	145222792	145223292	501	*	-3.32193	0.000173168	-0.0103448	Distal Intergenic	5	145231715	145247302	15588	1	72611	-8423	ENSMUSG00000007812	Zfp655	zinc finger protein 655
chr6_48479216_48479716	chr6	48479216	48479716	501	*	-2.32193	0.000173168	-0.0091954	Exon (ENSMUST00000212740.1/243369, exon 62 of 103)	6	48504337	48534832	30496	1	58894	-24621	ENSMUSG00000107476	Zfp862-ps	zinc finger protein 862, pseudogene
chr6_91212532_91213032	chr6	91212532	91213032	501	*	-2.32193	0.000173168	-0.0091954	Promoter (<=1kb)	6	91212455	91272540	60086	1	14115	77	ENSMUSG00000064080	Fbln2	fibulin 2
chr6_97433615_97434115	chr6	97433615	97434115	501	*	-2.32193	0.000173168	-0.0091954	Intron (ENSMUST00000113355.8/232288, intron 2 of 23)	6	97238534	97252759	14226	2	320502	-180856	ENSMUSG00000044086	Lmod3	leiomodin 3 (fetal)
chr6_128797749_128798249	chr6	128797749	128798249	501	*	-1.848	0.000173168	-0.0149425	Intron (ENSMUST00000204394.2/17059, intron 3 of 5)	6	128778485	128826252	47768	2	17059	28003	ENSMUSG00000030325	Klrb1c	killer cell lectin-like receptor subfamily B member 1C
chr6_134648560_134649060	chr6	134648560	134649060	501	*	-3.32193	0.000173168	-0.0103448	Intron (ENSMUST00000166591.7/67774, intron 2 of 3)	6	134639510	134711187	71678	1	67774	9050	ENSMUSG00000042992	Borcs5	BLOC-1 related complex subunit 5
chr6_143967688_143968188	chr6	143967688	143968188	501	*	-2.32193	0.000173168	-0.0091954	Intron (ENSMUST00000038815.13/20678, intron 6 of 14)	6	143593353	143651288	57936	2	73425	-316400	ENSMUSG00000086887	1700060C16Rik	RIKEN cDNA 1700060C16 gene
chr7_63907254_63907754	chr7	63907254	63907754	501	*	-2.32193	0.000173168	-0.0091954	Intron (ENSMUST00000063694.9/50794, intron 1 of 1)	7	63916857	63920539	3683	1	381994	-9103	ENSMUSG00000095061	E030018B13Rik	RIKEN cDNA E030018B13 gene
chr7_64032800_64033300	chr7	64032800	64033300	501	*	-2.32193	0.000173168	-0.0091954	Distal Intergenic	7	63886351	63938915	52565	2	50794	-93885	ENSMUSG00000052040	Klf13	Kruppel-like factor 13
chr7_67478060_67478560	chr7	67478060	67478560	501	*	-2.32193	0.000173168	-0.0091954	Distal Intergenic	7	67231163	67372858	141696	2	17258	-105202	ENSMUSG00000030557	Mef2a	myocyte enhancer factor 2A
chr7_91423569_91424069	chr7	91423569	91424069	501	*	-2.32193	0.000173168	-0.0091954	Intron (ENSMUST00000231777.2/23859, intron 6 of 27)	7	92092206	92119511	27306	2	75845	695442	ENSMUSG00000109382	4930567K12Rik	RIKEN cDNA 4930567K12 gene
chr7_94227369_94227869	chr7	94227369	94227869	501	*	-1.02748	0.000173168	-0.0310345	Intron (ENSMUST00000206116.1/ENSMUST00000206116.1, intron 1 of 1)	7	93178983	93184176	5194	2	100040298	-1043193	ENSMUSG00000087412	Gm15501	predicted pseudogene 15501
chr7_109531626_109532126	chr7	109531626	109532126	501	*	2.32193	0.000173168	0.0091954	Intron (ENSMUST00000079282.7/76954, intron 13 of 19)	7	109520120	109520251	132	1	100302499	11506	ENSMUSG00000065016	Snora3	small nucleolar RNA, H/ACA box 3
chr7_109649077_109649577	chr7	109649077	109649577	501	*	2.32193	0.000173168	0.0091954	Intron (ENSMUST00000207745.1/76954, intron 1 of 3)	7	109523911	109703605	179695	2	76954	54028	ENSMUSG00000031024	Denn2b	DENN domain containing 2B
chr7_126664623_126665123	chr7	126664623	126665123	501	*	-2.32193	0.000173168	-0.0091954	Exon (ENSMUST00000032956.9/75565, exon 4 of 10)	7	126672865	126676432	3568	2	20887	11309	ENSMUSG00000030711	Sult1a1	sulfotransferase family 1A, phenol-preferring, member 1
chr7_136081261_136081761	chr7	136081261	136081761	501	*	-2.32193	0.000173168	-0.0091954	Distal Intergenic	7	136268324	136318513	50190	1	77383	-186563	ENSMUSG00000110027	C030029H02Rik	RIKEN cDNA C030029H02 gene
chr7_140862027_140862527	chr7	140862027	140862527	501	*	-1.848	0.000173168	-0.0149425	3' UTR	7	140818087	140857577	39491	2	54399	-4450	ENSMUSG00000025484	Bet1l	Bet1 golgi vesicular membrane trafficking protein like
chr8_41026799_41027299	chr8	41026799	41027299	501	*	-2.32193	0.000173168	-0.0091954	Intron (ENSMUST00000059115.12/102103, intron 5 of 13)	8	41017468	41024216	6749	1	78849	9331	ENSMUSG00000084960	B430010I23Rik	RIKEN cDNA B430010I23 gene
chr8_47182244_47182744	chr8	47182244	47182744	501	*	2.32193	0.000173168	0.0091954	3' UTR	8	46986887	47096762	109876	1	320981	195357	ENSMUSG00000038173	Enpp6	ectonucleotide pyrophosphatase/phosphodiesterase 6
chr8_49015179_49015679	chr8	49015179	49015679	501	*	-2.32193	0.000173168	-0.0091954	Distal Intergenic	8	48227682	48843951	616270	2	23965	-171228	ENSMUSG00000031561	Tenm3	teneurin transmembrane protein 3
chr8_70374446_70374946	chr8	70374446	70374946	501	*	-1.848	0.000173168	-0.0149425	Promoter (<=1kb)	8	70373558	70382066	8509	1	12845	888	ENSMUSG00000031849	Comp	cartilage oligomeric matrix protein
chr8_70524253_70524753	chr8	70524253	70524753	501	*	-2.32193	0.000173168	-0.0091954	Promoter (1-2kb)	8	70508263	70523163	14901	2	22186	-1090	ENSMUSG00000090137	Uba52	ubiquitin A-52 residue ribosomal protein fusion product 1
chr9_41600238_41600738	chr9	41600238	41600738	501	*	-1.848	0.000173168	-0.0149425	Exon (ENSMUST00000188412.1/73144, exon 1 of 2)	9	41581926	41582002	77	1	387236	18312	ENSMUSG00000093354	Mir125b-1	microRNA 125b-1
chr9_45507700_45508200	chr9	45507700	45508200	501	*	-1.848	0.000173168	-0.0149425	Intron (ENSMUST00000217335.1/114873, intron 5 of 5)	9	45416626	45431730	15105	2	74602	-75970	ENSMUSG00000097074	4833428L15Rik	RIKEN cDNA 4833428L15 gene
chr9_48731416_48731916	chr9	48731416	48731916	501	*	-1.848	0.000173168	-0.0149425	Intron (ENSMUST00000093852.4/235320, intron 3 of 6)	9	48654297	48836222	181926	2	235320	104306	ENSMUSG00000066687	Zbtb16	zinc finger and BTB domain containing 16
chr9_53061528_53062028	chr9	53061528	53062028	501	*	-3.32193	0.000173168	-0.0103448	Distal Intergenic	9	53098635	53248053	149419	2	77591	186025	ENSMUSG00000053289	Ddx10	DEAD box helicase 10
chr9_56766520_56767020	chr9	56766520	56767020	501	*	-1.848	0.000173168	-0.0149425	Intron (ENSMUST00000210032.1/235402, intron 2 of 6)	9	56618475	56796468	177994	2	235402	29448	ENSMUSG00000049556	Lingo1	leucine rich repeat and Ig domain containing 1
chr9_56915079_56915579	chr9	56915079	56915579	501	*	2.32193	0.000173168	0.0091954	Downstream (1-2kb)	9	56917193	56928371	11179	2	235406	12792	ENSMUSG00000032733	Snx33	sorting nexin 33
chr9_60671779_60672279	chr9	60671779	60672279	501	*	-1.848	0.000173168	-0.0149425	Intron (ENSMUST00000150060.7/102747, intron 5 of 16)	9	60568859	60688158	119300	2	102747	15879	ENSMUSG00000047766	Lrrc49	leucine rich repeat containing 49
chr9_64605627_64606127	chr9	64605627	64606127	501	*	-3.32193	0.000173168	-0.0103448	Intron (ENSMUST00000093829.8/214058, intron 4 of 22)	9	64715299	64737758	22460	2	53869	131631	ENSMUSG00000004771	Rab11a	RAB11A, member RAS oncogene family
chr9_103214874_103215374	chr9	103214874	103215374	501	*	-2.32193	0.000173168	-0.0091954	Exon (ENSMUST00000112645.7/22041, exon 14 of 18)	9	103188032	103202137	14106	2	20818	-12737	ENSMUSG00000032553	Srprb	signal recognition particle receptor, B subunit
chr9_109942782_109943282	chr9	109942782	109943282	501	*	3.32193	0.000173168	0.0103448	Intron (ENSMUST00000035055.14/17758, intron 1 of 18)	9	109931460	110083955	152496	1	17758	11322	ENSMUSG00000032479	Map4	microtubule-associated protein 4
chrX_73593134_73593634	chrX	73593134	73593634	501	*	-1.848	0.000173168	-0.0149425	Distal Intergenic	20	73639419	73643514	4096	1	75590	-45785	ENSMUSG00000031383	Dusp9	dual specificity phosphatase 9
chrX_99561655_99562155	chrX	99561655	99562155	501	*	-2.32193	0.000173168	-0.0091954	Distal Intergenic	20	99465734	99471273	5540	2	18744	-90382	ENSMUSG00000034403	Pja1	praja ring finger ubiquitin ligase 1
chrX_136744612_136745112	chrX	136744612	136745112	501	*	-2.32193	0.000173168	-0.0091954	Promoter (<=1kb)	20	136732942	136743690	10749	2	56397	-922	ENSMUSG00000031422	Morf4l2	mortality factor 4 like 2
chr13_31992461_31992961	chr13	31992461	31992961	501	*	-1.05889	0.000173832	-0.0298851	Intron (ENSMUST00000041859.8/218138, intron 7 of 10)	13	31806633	31812476	5844	1	17300	185828	ENSMUSG00000050295	Foxc1	forkhead box C1
chr13_105176845_105177345	chr13	105176845	105177345	501	*	-1.05889	0.000173832	-0.0298851	Intron (ENSMUST00000226044.1/71816, intron 6 of 7)	13	105082122	105121782	39661	1	66763	94723	ENSMUSG00000021718	Nt5el	5' nucleotidase, ecto-like
chr19_7072294_7072794	chr19	7072294	7072794	501	*	-1.05889	0.000173832	-0.0298851	Intron (ENSMUST00000040261.6/107227, intron 3 of 10)	19	7056810	7198057	141248	1	107227	15484	ENSMUSG00000036278	Macrod1	mono-ADP ribosylhydrolase 1
chr2_116899298_116899798	chr2	116899298	116899798	501	*	-1.05889	0.000173832	-0.0298851	Promoter (<=1kb)	2	116900152	116912791	12640	1	320975	-354	ENSMUSG00000085316	D330050G23Rik	RIKEN cDNA D330050G23 gene
chr4_130829150_130829650	chr4	130829150	130829650	501	*	-1.05889	0.000173832	-0.0298851	Distal Intergenic	4	130792537	130826319	33783	1	20970	36613	ENSMUSG00000025743	Sdc3	syndecan 3
chr10_76734979_76735479	chr10	76734979	76735479	501	*	-1.1375	0.000176166	-0.0275862	Distal Intergenic	10	76708792	76726168	17377	2	12833	-8811	ENSMUSG00000001119	Col6a1	collagen, type VI, alpha 1
chr11_69196742_69197242	chr11	69196742	69197242	501	*	-1.1375	0.000176166	-0.0275862	Promoter (<=1kb)	11	69183932	69197843	13912	2	11688	601	ENSMUSG00000020891	Alox8	arachidonate 8-lipoxygenase
chr2_153528831_153529331	chr2	153528831	153529331	501	*	-1.1375	0.000176166	-0.0275862	Promoter (<=1kb)	2	153407462	153529971	122510	2	329540	640	ENSMUSG00000061411	Nol4l	nucleolar protein 4-like
chr2_161139251_161139751	chr2	161139251	161139751	501	*	-1.1375	0.000176166	-0.0275862	Distal Intergenic	2	160946978	161109075	162098	2	71389	-30176	ENSMUSG00000057133	Chd6	chromodomain helicase DNA binding protein 6
chr4_115962824_115963324	chr4	115962824	115963324	501	*	-1.1375	0.000176166	-0.0275862	Distal Intergenic	4	115915119	115939926	24808	2	140477	-22898	ENSMUSG00000028707	Dmbx1	diencephalon/mesencephalon homeobox 1
chr7_28807553_28808053	chr7	28807553	28808053	501	*	-1.1375	0.000176166	-0.0275862	Promoter (<=1kb)	7	28808541	28822266	13726	1	15388	-488	ENSMUSG00000015165	Hnrnpl	heterogeneous nuclear ribonucleoprotein L
chr10_128176387_128176887	chr10	128176387	128176887	501	*	-1.09516	0.000177469	-0.0287356	5' UTR	10	128131558	128180297	48740	2	56516	3410	ENSMUSG00000040043	Rbms2	RNA binding motif, single stranded interacting protein 2
chr11_65111144_65111644	chr11	65111144	65111644	501	*	-1.09516	0.000177469	-0.0287356	Intron (ENSMUST00000047463.14/216831, intron 1 of 20)	11	65002039	65162961	160923	2	216831	51317	ENSMUSG00000033389	Arhgap44	Rho GTPase activating protein 44
chr5_117115310_117115810	chr5	117115310	117115810	501	*	-1.09516	0.000177469	-0.0287356	Promoter (<=1kb)	5	117091680	117116113	24434	2	71954	303	ENSMUSG00000066900	Suds3	suppressor of defective silencing 3 homolog (S. cerevisiae)
chr1_132689992_132690492	chr1	132689992	132690492	501	*	-1.58496	0.000181925	-0.0183908	Intron (ENSMUST00000094569.10/269116, intron 1 of 29)	1	132729355	132732826	3472	1	100038653	-38863	ENSMUSG00000101126	Gm10538	predicted gene 10538
chr1_193083952_193084452	chr1	193083952	193084452	501	*	-1.58496	0.000181925	-0.0183908	Distal Intergenic	1	193091104	193130272	39169	2	215193	45820	ENSMUSG00000016181	Utp25	UTP25 small subunit processome component
chr11_32233684_32234184	chr11	32233684	32234184	501	*	-1.58496	0.000181925	-0.0183908	3' UTR	11	32226505	32232700	6196	1	268395	7179	ENSMUSG00000020287	Mpg	N-methylpurine-DNA glycosylase
chr12_73952899_73953399	chr12	73952899	73953399	501	*	-1.58496	0.000181925	-0.0183908	Intron (ENSMUST00000221833.1/75627, intron 1 of 2)	12	73937653	73988966	51314	1	75627	15246	ENSMUSG00000021113	Snapc1	small nuclear RNA activating complex, polypeptide 1
chr13_51603138_51603638	chr13	51603138	51603638	501	*	-1.58496	0.000181925	-0.0183908	Distal Intergenic	13	51431041	51569487	138447	2	20418	-33651	ENSMUSG00000021448	Shc3	src homology 2 domain-containing transforming protein C3
chr15_6883775_6884275	chr15	6883775	6884275	501	*	-1.58496	0.000181925	-0.0183908	Distal Intergenic	15	6813577	6874969	61393	2	18414	-8806	ENSMUSG00000022146	Osmr	oncostatin M receptor
chr17_75816218_75816718	chr17	75816218	75816718	501	*	-1.58496	0.000181925	-0.0183908	Distal Intergenic	17	75861023	75889039	28017	1	100043885	-44305	ENSMUSG00000117539	Gm4710	predicted gene 4710
chr18_35056896_35057396	chr18	35056896	35057396	501	*	-1.58496	0.000181925	-0.0183908	Intron (ENSMUST00000237091.1/ENSMUST00000237091.1, intron 3 of 3)	18	35118859	35254779	135921	1	12385	-61463	ENSMUSG00000037815	Ctnna1	catenin (cadherin associated protein), alpha 1
chr19_47280793_47281293	chr19	47280793	47281293	501	*	-1.58496	0.000181925	-0.0183908	Intron (ENSMUST00000081619.9/14218, intron 10 of 14)	19	47273519	47273589	71	2	102466782	-7204	ENSMUSG00000098786	Mir6995	microRNA 6995
chr2_84481827_84482327	chr2	84481827	84482327	501	*	-1.58496	0.000181925	-0.0183908	Distal Intergenic	2	84432855	84476775	43921	2	21788	-5052	ENSMUSG00000027082	Tfpi	tissue factor pathway inhibitor
chr3_60601595_60602095	chr3	60601595	60602095	501	*	-1.58496	0.000181925	-0.0183908	Intron (ENSMUST00000195077.5/56758, intron 3 of 3)	3	60472830	60629750	156921	1	56758	128765	ENSMUSG00000027763	Mbnl1	muscleblind like splicing factor 1
chr8_11496562_11497062	chr8	11496562	11497062	501	*	-1.58496	0.000181925	-0.0183908	Promoter (<=1kb)	8	11497506	11514960	17455	1	69225	-444	ENSMUSG00000031505	Naxd	NAD(P)HX dehydratase
chr1_132938891_132939391	chr1	132938891	132939391	501	*	-1.73697	0.000191625	-0.016092	Exon (ENSMUST00000027706.3/16980, exon 2 of 2)	1	132880273	132940005	59733	1	16980	58618	ENSMUSG00000026443	Lrrn2	leucine rich repeat protein 2, neuronal
chr1_153036157_153036657	chr1	153036157	153036657	501	*	-2.11548	0.000191625	-0.0114943	Intron (ENSMUST00000186368.6/226518, intron 1 of 11)	1	152954993	153119261	164269	1	226518	81164	ENSMUSG00000042751	Nmnat2	nicotinamide nucleotide adenylyltransferase 2
chr1_159696609_159697109	chr1	159696609	159697109	501	*	-1.65208	0.000191625	-0.0172414	Intron (ENSMUST00000192069.5/21960, intron 1 of 22)	1	159523769	159931729	407961	1	21960	172840	ENSMUSG00000015829	Tnr	tenascin R
chr10_13682446_13682946	chr10	13682446	13682946	501	*	-2.11548	0.000191625	-0.0114943	Intron (ENSMUST00000162610.7/66253, intron 4 of 5)	10	13523842	13553142	29301	2	56535	-129304	ENSMUSG00000019809	Pex3	peroxisomal biogenesis factor 3
chr10_39420648_39421148	chr10	39420648	39421148	501	*	-1.65208	0.000191625	-0.0172414	Intron (ENSMUST00000148152.7/14360, intron 2 of 4)	10	39368855	39565381	196527	1	14360	51793	ENSMUSG00000019843	Fyn	Fyn proto-oncogene
chr10_42227743_42228243	chr10	42227743	42228243	501	*	2.11548	0.000191625	0.0114943	Intron (ENSMUST00000105502.7/56484, intron 2 of 3)	10	42181841	42276755	94915	2	56484	48512	ENSMUSG00000048756	Foxo3	forkhead box O3
chr10_110782640_110783140	chr10	110782640	110783140	501	*	-2.11548	0.000191625	-0.0114943	Intron (ENSMUST00000073781.11/52679, intron 12 of 12)	10	110745439	110787384	41946	1	52679	37201	ENSMUSG00000020185	E2f7	E2F transcription factor 7
chr11_18989563_18990063	chr11	18989563	18990063	501	*	2.11548	0.000191625	0.0114943	Intron (ENSMUST00000144988.7/17268, intron 6 of 9)	11	18879817	19018985	139169	2	17268	28922	ENSMUSG00000020160	Meis1	Meis homeobox 1
chr11_69880152_69880652	chr11	69880152	69880652	501	*	-2.11548	0.000191625	-0.0114943	Promoter (<=1kb)	11	69878261	69881406	3146	2	216858	754	ENSMUSG00000046731	Kctd11	potassium channel tetramerisation domain containing 11
chr11_97445488_97445988	chr11	97445488	97445988	501	*	-2.11548	0.000191625	-0.0114943	Intron (ENSMUST00000121799.7/58996, intron 2 of 23)	11	97415533	97502402	86870	1	58996	29955	ENSMUSG00000049807	Arhgap23	Rho GTPase activating protein 23
chr11_104306360_104306860	chr11	104306360	104306860	501	*	-1.73697	0.000191625	-0.016092	Exon (ENSMUST00000106992.9/17762, exon 5 of 10)	11	104231390	104332090	100701	1	17762	74970	ENSMUSG00000018411	Mapt	microtubule-associated protein tau
chr11_121448713_121449213	chr11	121448713	121449213	501	*	-2.11548	0.000191625	-0.0114943	Promoter (2-3kb)	11	121451949	121617164	165216	1	108903	-2736	ENSMUSG00000039230	Tbcd	tubulin-specific chaperone d
chr12_74081866_74082366	chr12	74081866	74082366	501	*	-1.73697	0.000191625	-0.016092	Intron (ENSMUST00000221220.1/238266, intron 1 of 6)	12	73997661	74273267	275607	1	238266	84205	ENSMUSG00000044912	Syt16	synaptotagmin XVI
chr12_89460890_89461390	chr12	89460890	89461390	501	*	-1.73697	0.000191625	-0.016092	Intron (ENSMUST00000190626.6/18191, intron 7 of 18)	12	88722876	90334935	1612060	1	18191	738014	ENSMUSG00000066392	Nrxn3	neurexin III
chr13_8584245_8584745	chr13	8584245	8584745	501	*	2.11548	0.000191625	0.0114943	Intron (ENSMUST00000064473.12/94191, intron 3 of 9)	13	8802968	8871909	68942	2	207615	287164	ENSMUSG00000021147	Wdr37	WD repeat domain 37
chr13_30993825_30994325	chr13	30993825	30994325	501	*	-1.65208	0.000191625	-0.0172414	Distal Intergenic	13	30813919	30974093	160175	2	66482	-19732	ENSMUSG00000021357	Exoc2	exocyst complex component 2
chr13_57633016_57633516	chr13	57633016	57633516	501	*	2.11548	0.000191625	0.0114943	Intron (ENSMUST00000187852.6/20745, intron 3 of 9)	13	57421195	57908332	487138	2	20745	274816	ENSMUSG00000056222	Spock1	sparc/osteonectin, cwcv and kazal-like domains proteoglycan 1
chr13_119695561_119696061	chr13	119695561	119696061	501	*	-2.11548	0.000191625	-0.0114943	Intron (ENSMUST00000225543.1/208715, intron 2 of 2)	13	119690379	119708260	17882	1	208715	5182	ENSMUSG00000093930	Hmgcs1	3-hydroxy-3-methylglutaryl-Coenzyme A synthase 1
chr14_31685488_31685988	chr14	31685488	31685988	501	*	-2.11548	0.000191625	-0.0114943	Distal Intergenic	14	31552905	31641286	88382	2	56794	-44202	ENSMUSG00000021884	Hacl1	2-hydroxyacyl-CoA lyase 1
chr14_55576272_55576772	chr14	55576272	55576772	501	*	-2.11548	0.000191625	-0.0114943	Promoter (<=1kb)	14	55575617	55576954	1338	1	68680	655	ENSMUSG00000022215	Fitm1	fat storage-inducing transmembrane protein 1
chr14_60513539_60514039	chr14	60513539	60514039	501	*	-1.73697	0.000191625	-0.016092	Intron (ENSMUST00000190392.1/ENSMUST00000190392.1, intron 2 of 2)	14	60634001	60764556	130556	1	219140	-119962	ENSMUSG00000021990	Spata13	spermatogenesis associated 13
chr15_4052499_4052999	chr15	4052499	4052999	501	*	-1.73697	0.000191625	-0.016092	Intron (ENSMUST00000110690.8/67041, intron 4 of 16)	15	4021686	4027405	5720	2	414066	-25094	NA	BC037032	cDNA Sequence BC037032
chr15_74492959_74493459	chr15	74492959	74493459	501	*	-1.65208	0.000191625	-0.0172414	Distal Intergenic	15	74516195	74589465	73271	1	107831	-22736	ENSMUSG00000034730	Adgrb1	adhesion G protein-coupled receptor B1
chr15_80201019_80201519	chr15	80201019	80201519	501	*	-2.11548	0.000191625	-0.0114943	Intron (ENSMUST00000044970.6/17309, intron 1 of 1)	15	80173721	80215519	41799	1	17309	27298	ENSMUSG00000042428	Mgat3	mannoside acetylglucosaminyltransferase 3
chr17_5096381_5096881	chr17	5096381	5096881	501	*	-2.11548	0.000191625	-0.0114943	Intron (ENSMUST00000124362.1/239985, intron 2 of 2)	17	4994332	5347656	353325	1	239985	102049	ENSMUSG00000069729	Arid1b	AT rich interactive domain 1B (SWI-like)
chr17_44023693_44024193	chr17	44023693	44024193	501	*	-2.11548	0.000191625	-0.0114943	Intron (ENSMUST00000228972.1/53901, intron 4 of 4)	17	44078813	44086567	7755	1	83965	-54620	ENSMUSG00000023960	Enpp5	ectonucleotide pyrophosphatase/phosphodiesterase 5
chr17_46256461_46256961	chr17	46256461	46256961	501	*	1.73697	0.000191625	0.016092	Promoter (2-3kb)	17	46253531	46257315	3785	1	224813	2930	ENSMUSG00000071073	Lrrc73	leucine rich repeat containing 73
chr18_23750762_23751262	chr18	23750762	23751262	501	*	-1.65208	0.000191625	-0.0172414	Promoter (1-2kb)	18	23750447	23752305	1859	2	100502834	1043	ENSMUSG00000086287	Gm15972	predicted gene 15972
chr18_39929876_39930376	chr18	39929876	39930376	501	*	1.73697	0.000191625	0.016092	Distal Intergenic	18	39773497	39776082	2586	1	18459	156379	ENSMUSG00000051732	Pabpc2	poly(A) binding protein, cytoplasmic 2
chr19_15923428_15923928	chr19	15923428	15923928	501	*	-1.73697	0.000191625	-0.016092	Intron (ENSMUST00000025542.9/107272, intron 1 of 8)	19	15904678	15947337	42660	2	107272	23409	ENSMUSG00000024640	Psat1	phosphoserine aminotransferase 1
chr19_46037898_46038398	chr19	46037898	46038398	501	*	-2.11548	0.000191625	-0.0114943	Intron (ENSMUST00000156585.8/16825, intron 1 of 10)	19	46044886	46072915	28030	1	226169	-6488	ENSMUSG00000055491	Pprc1	peroxisome proliferative activated receptor, gamma, coactivator-related 1
chr2_59331494_59331994	chr2	59331494	59331994	501	*	2.11548	0.000191625	0.0114943	Intron (ENSMUST00000168631.7/227937, intron 11 of 20)	2	59382502	59387471	4970	2	76676	55477	ENSMUSG00000087455	5330411J11Rik	RIKEN cDNA 5330411J11 gene
chr2_180499680_180500180	chr2	180499680	180500180	501	*	-1.65208	0.000191625	-0.0172414	Promoter (<=1kb)	2	180499976	180544980	45005	1	18216	0	ENSMUSG00000027568	Ntsr1	neurotensin receptor 1
chr3_8916242_8916742	chr3	8916242	8916742	501	*	-1.65208	0.000191625	-0.0172414	Intron (ENSMUST00000042148.5/66230, intron 1 of 2)	3	8802146	8923918	121773	2	66230	7176	ENSMUSG00000040269	Mrps28	mitochondrial ribosomal protein S28
chr3_52246408_52246908	chr3	52246408	52246908	501	*	-1.65208	0.000191625	-0.0172414	Exon (ENSMUST00000193866.2/ENSMUST00000193866.2, exon 1 of 2)	3	52268336	52353221	84886	1	56458	-21428	ENSMUSG00000044167	Foxo1	forkhead box O1
chr3_138805480_138805980	chr3	138805480	138805980	501	*	-2.11548	0.000191625	-0.0114943	Intron (ENSMUST00000029800.8/56224, intron 1 of 7)	3	138742195	138907905	165711	1	56224	63285	ENSMUSG00000028152	Tspan5	tetraspanin 5
chr3_146780993_146781493	chr3	146780993	146781493	501	*	-2.11548	0.000191625	-0.0114943	5' UTR	3	146729574	146812960	83387	2	18749	31467	ENSMUSG00000005034	Prkacb	protein kinase, cAMP dependent, catalytic, beta
chr4_15267831_15268331	chr4	15267831	15268331	501	*	-1.73697	0.000191625	-0.016092	Promoter (1-2kb)	4	15265831	15286753	20923	1	100201	2000	ENSMUSG00000043252	Tmem64	transmembrane protein 64
chr4_83515254_83515754	chr4	83515254	83515754	501	*	-2.11548	0.000191625	-0.0114943	Distal Intergenic	4	83525545	83864670	339126	1	320226	-9791	ENSMUSG00000052407	Ccdc171	coiled-coil domain containing 171
chr4_109053476_109053976	chr4	109053476	109053976	501	*	-2.11548	0.000191625	-0.0114943	Exon (ENSMUST00000065977.10/230598, exon 21 of 31)	4	109017655	109017730	76	1	791075	35821	ENSMUSG00000076444	Mir761	microRNA 761
chr4_124834777_124835277	chr4	124834777	124835277	501	*	2.11548	0.000191625	0.0114943	Intron (ENSMUST00000106193.7/17764, intron 8 of 11)	4	124850679	124855242	4564	1	230734	-15402	ENSMUSG00000028889	Yrdc	yrdC domain containing (E.coli)
chr4_137718750_137719250	chr4	137718750	137719250	501	*	-1.65208	0.000191625	-0.0172414	Exon (ENSMUST00000105835.7/110351, exon 14 of 25)	4	137696979	137706606	9628	2	69808	-12144	ENSMUSG00000087476	Rap1gapos	RAP1 GTPase activating protein, opposite strand
chr4_141957359_141957859	chr4	141957359	141957859	501	*	-2.11548	0.000191625	-0.0114943	Exon (ENSMUST00000105780.7/329977, exon 11 of 33)	4	141982992	141986797	3806	1	545691	-25133	ENSMUSG00000085424	Fhad1os1	forkhead-associated (FHA) phosphopeptide binding domain 1, opposite strand 1
chr4_149895239_149895739	chr4	149895239	149895739	501	*	-2.11548	0.000191625	-0.0114943	Downstream (<1kb)	4	149896283	149955043	58761	2	74646	59304	ENSMUSG00000039911	Spsb1	splA/ryanodine receptor domain and SOCS box containing 1
chr5_109922405_109922905	chr5	109922405	109922905	501	*	-2.11548	0.000191625	-0.0114943	Promoter (<=1kb)	5	109923400	109943936	20537	1	100642166	-495	ENSMUSG00000090015	Gm15446	predicted gene 15446
chr5_124546348_124546848	chr5	124546348	124546848	501	*	2.11548	0.000191625	0.0114943	Intron (ENSMUST00000060226.10/56334, intron 2 of 3)	5	124540695	124550506	9812	1	56334	5653	ENSMUSG00000029390	Tmed2	transmembrane p24 trafficking protein 2
chr5_135472702_135473202	chr5	135472702	135473202	501	*	-1.65208	0.000191625	-0.0172414	Exon (ENSMUST00000201839.1/ENSMUST00000201839.1, exon 1 of 1)	5	135406531	135545120	138590	2	215114	71918	ENSMUSG00000039959	Hip1	huntingtin interacting protein 1
chr5_139289852_139290352	chr5	139289852	139290352	501	*	-2.11548	0.000191625	-0.0114943	Intron (ENSMUST00000151450.7/231821, intron 4 of 10)	5	139271876	139325622	53747	2	231821	35270	ENSMUSG00000056413	Adap1	ArfGAP with dual PH domains 1
chr5_139313521_139314021	chr5	139313521	139314021	501	*	1.73697	0.000191625	0.016092	Intron (ENSMUST00000110865.1/231821, intron 1 of 10)	5	139271876	139325622	53747	2	231821	11601	ENSMUSG00000056413	Adap1	ArfGAP with dual PH domains 1
chr5_147402459_147402959	chr5	147402459	147402959	501	*	-1.65208	0.000191625	-0.0172414	Promoter (1-2kb)	5	147330741	147400489	69749	2	14255	-1970	ENSMUSG00000042817	Flt3	FMS-like tyrosine kinase 3
chr6_34346517_34347017	chr6	34346517	34347017	501	*	-1.73697	0.000191625	-0.016092	Distal Intergenic	6	34354119	34368463	14345	1	14187	-7102	ENSMUSG00000029762	Akr1b8	aldo-keto reductase family 1, member B8
chr6_49929190_49929690	chr6	49929190	49929690	501	*	-1.65208	0.000191625	-0.0172414	Distal Intergenic	6	49822710	49829507	6798	1	109648	106480	ENSMUSG00000029819	Npy	neuropeptide Y
chr6_54183769_54184269	chr6	54183769	54184269	501	*	-2.11548	0.000191625	-0.0114943	Intron (ENSMUST00000046856.13/69993, intron 2 of 12)	6	54326883	54330201	3319	1	78004	-142614	ENSMUSG00000045725	Prr15	proline rich 15
chr6_128099143_128099643	chr6	128099143	128099643	501	*	-2.11548	0.000191625	-0.0114943	Intron (ENSMUST00000112173.7/109246, intron 1 of 7)	6	127961396	128143594	182199	2	109246	43951	ENSMUSG00000030352	Tspan9	tetraspanin 9
chr7_35336063_35336563	chr7	35336063	35336563	501	*	-2.11548	0.000191625	-0.0114943	Promoter (1-2kb)	7	35334170	35392289	58120	1	52428	1893	ENSMUSG00000030494	Rhpn2	rhophilin, Rho GTPase binding protein 2
chr7_74360923_74361423	chr7	74360923	74361423	501	*	-2.11548	0.000191625	-0.0114943	Intron (ENSMUST00000098371.8/108116, intron 2 of 10)	7	74275419	74554780	279362	2	108116	193357	ENSMUSG00000025790	Slco3a1	solute carrier organic anion transporter family, member 3a1
chr7_105742662_105743162	chr7	105742662	105743162	501	*	-2.11548	0.000191625	-0.0114943	Promoter (1-2kb)	7	105739393	105744361	4969	2	24075	1199	ENSMUSG00000043866	Taf10	TATA-box binding protein associated factor 10
chr7_118982688_118983188	chr7	118982688	118983188	501	*	-1.73697	0.000191625	-0.016092	Intron (ENSMUST00000008878.9/64297, intron 2 of 3)	7	118972047	118995211	23165	2	64297	12023	ENSMUSG00000008734	Gprc5b	G protein-coupled receptor, family C, group 5, member B
chr7_128623561_128624061	chr7	128623561	128624061	501	*	-2.11548	0.000191625	-0.0114943	Intron (ENSMUST00000098007.10/101490, intron 1 of 9)	7	128611328	128696425	85098	1	101490	12233	ENSMUSG00000042105	Inpp5f	inositol polyphosphate-5-phosphatase F
chr8_3441792_3442292	chr8	3441792	3442292	501	*	2.11548	0.000191625	0.0114943	Intron (ENSMUST00000239102.1/102098, intron 18 of 28)	8	3457105	3467680	10576	2	69129	25388	ENSMUSG00000069633	Pex11g	peroxisomal biogenesis factor 11 gamma
chr8_68732388_68732888	chr8	68732388	68732888	501	*	-1.65208	0.000191625	-0.0172414	Promoter (2-3kb)	8	68356781	68735146	378366	2	234356	2258	ENSMUSG00000036356	Csgalnact1	chondroitin sulfate N-acetylgalactosaminyltransferase 1
chr8_105463388_105463888	chr8	105463388	105463888	501	*	2.11548	0.000191625	0.0114943	3' UTR	8	105467493	105471526	4034	2	67971	7638	ENSMUSG00000014846	Tppp3	tubulin polymerization-promoting protein family member 3
chr9_35172557_35173057	chr9	35172557	35173057	501	*	-2.11548	0.000191625	-0.0114943	Intron (ENSMUST00000034539.11/69305, intron 1 of 5)	9	35124408	35176061	51654	2	69305	3004	ENSMUSG00000032040	Dcps	decapping enzyme, scavenger
chr9_45545985_45546485	chr9	45545985	45546485	501	*	-2.11548	0.000191625	-0.0114943	Intron (ENSMUST00000217335.1/114873, intron 5 of 5)	9	45416626	45431730	15105	2	74602	-114255	ENSMUSG00000097074	4833428L15Rik	RIKEN cDNA 4833428L15 gene
chr9_120356087_120356587	chr9	120356087	120356587	501	*	-2.11548	0.000191625	-0.0114943	Intron (ENSMUST00000133173.2/245049, intron 2 of 5)	9	120301513	120474841	173329	1	245049	54574	ENSMUSG00000041794	Myrip	myosin VIIA and Rab interacting protein
chrX_12860108_12860608	chrX	12860108	12860608	501	*	-2.11548	0.000191625	-0.0114943	Distal Intergenic	20	12936872	12938128	1257	1	245350	-76264	ENSMUSG00000083307	AA414768	expressed sequence AA414768
chrX_73780880_73781380	chrX	73780880	73781380	501	*	-2.11548	0.000191625	-0.0114943	Exon (ENSMUST00000052761.8/15929, exon 6 of 13)	20	73778963	73786897	7935	2	15929	5517	ENSMUSG00000002010	Idh3g	isocitrate dehydrogenase 3 (NAD+), gamma
chrX_95155674_95156174	chrX	95155674	95156174	501	*	-2.11548	0.000191625	-0.0114943	Intron (ENSMUST00000113876.8/236915, intron 1 of 9)	20	95048935	95196856	147922	2	236915	40682	ENSMUSG00000025656	Arhgef9	CDC42 guanine nucleotide exchange factor (GEF) 9
chrX_98701605_98702105	chrX	98701605	98702105	501	*	-1.73697	0.000191625	-0.016092	Exon (ENSMUST00000033560.8/94190, exon 12 of 25)	20	98554277	98891025	336749	2	94190	188920	ENSMUSG00000031214	Ophn1	oligophrenin 1
chrX_111895030_111895530	chrX	111895030	111895530	501	*	-2.11548	0.000191625	-0.0114943	Intron (ENSMUST00000207962.1/71030, intron 1 of 15)	20	111891389	112243852	352464	1	71030	3641	ENSMUSG00000079460	4933403O08Rik	RIKEN cDNA 4933403O08 gene
chr1_59625331_59625831	chr1	59625331	59625831	501	*	-1.26303	0.000193545	-0.0241379	Intron (ENSMUST00000114243.7/381260, intron 14 of 19)	1	59586558	59670834	84277	2	22218	45003	ENSMUSG00000026021	Sumo1	small ubiquitin-like modifier 1
chr12_21214695_21215195	chr12	21214695	21215195	501	*	-1.26303	0.000193545	-0.0241379	Intron (ENSMUST00000064595.14/211914, intron 10 of 28)	12	21285525	21315056	29532	1	54451	-70330	ENSMUSG00000054309	Cpsf3	cleavage and polyadenylation specificity factor 3
chr15_12010446_12010946	chr15	12010446	12010946	501	*	-1.26303	0.000193545	-0.0241379	Distal Intergenic	15	11981339	11996983	15645	2	20024	-13463	ENSMUSG00000022205	Sub1	SUB1 homolog, transcriptional regulator
chr19_10940908_10941408	chr19	10940908	10941408	501	*	-1.26303	0.000193545	-0.0241379	3' UTR	19	10937160	10942511	5352	1	14764	3748	ENSMUSG00000034117	Ptgdr2	prostaglandin D2 receptor 2
chr5_88657835_88658335	chr5	88657835	88658335	501	*	-1.26303	0.000193545	-0.0241379	Downstream (1-2kb)	5	88659448	88676171	16724	2	231413	17836	ENSMUSG00000044221	Grsf1	G-rich RNA sequence binding factor 1
chr6_41606622_41607122	chr6	41606622	41607122	501	*	-1.26303	0.000193545	-0.0241379	Promoter (1-2kb)	6	41605482	41620509	15028	1	13848	1140	ENSMUSG00000029869	Ephb6	Eph receptor B6
chr6_136860934_136861434	chr6	136860934	136861434	501	*	-1.26303	0.000193545	-0.0241379	Distal Intergenic	6	136848451	136857733	9283	2	109978	-3201	ENSMUSG00000030217	Art4	ADP-ribosyltransferase 4
chr7_28411008_28411508	chr7	28411008	28411508	501	*	-1.26303	0.000193545	-0.0241379	Intron (ENSMUST00000208199.1/233033, intron 3 of 12)	7	28392951	28399388	6438	1	54624	18057	ENSMUSG00000003437	Paf1	Paf1, RNA polymerase II complex component
chr7_98071559_98072059	chr7	98071559	98072059	501	*	-1.26303	0.000193545	-0.0241379	Exon (ENSMUST00000107128.7/17921, exon 30 of 49)	7	98051060	98119524	68465	2	17921	47465	ENSMUSG00000030761	Myo7a	myosin VIIA
chr7_101412651_101413151	chr7	101412651	101413151	501	*	-1.26303	0.000193545	-0.0241379	Promoter (1-2kb)	7	101410886	101512827	101942	1	207728	1765	ENSMUSG00000030653	Pde2a	phosphodiesterase 2A, cGMP-stimulated
chr8_70314805_70315305	chr8	70314805	70315305	501	*	-1.26303	0.000193545	-0.0241379	Promoter (<=1kb)	8	70315775	70331592	15818	1	14559	-470	ENSMUSG00000087408	Gdf1	growth differentiation factor 1
chr10_81567125_81567625	chr10	81567125	81567625	501	*	-1.36923	0.000200905	-0.0218391	Distal Intergenic	10	81574561	81590845	16285	1	21886	-6936	ENSMUSG00000034771	Tle2	transducin-like enhancer of split 2
chr10_119830370_119830870	chr10	119830370	119830870	501	*	-1.36923	0.000200905	-0.0218391	Intron (ENSMUST00000077871.13/74053, intron 1 of 21)	10	119825204	119852390	27187	2	78105	21520	ENSMUSG00000085418	Grip1os1	glutamate receptor interacting protein 1, opposite strand 1
chr12_77594624_77595124	chr12	77594624	77595124	501	*	-1.36923	0.000200905	-0.0218391	Distal Intergenic	12	77238125	77476338	238214	1	53618	356499	ENSMUSG00000021065	Fut8	fucosyltransferase 8
chr14_64799242_64799742	chr14	64799242	64799742	501	*	-1.36923	0.000200905	-0.0218391	Intron (ENSMUST00000100473.4/16554, intron 37 of 39)	14	64811600	64949871	138272	2	219150	150129	ENSMUSG00000021972	Hmbox1	homeobox containing 1
chr14_66805174_66805674	chr14	66805174	66805674	501	*	-1.36923	0.000200905	-0.0218391	3' UTR	14	66802864	66868688	65825	2	12934	63014	ENSMUSG00000022048	Dpysl2	dihydropyrimidinase-like 2
chr17_27685509_27686009	chr17	27685509	27686009	501	*	-1.36923	0.000200905	-0.0218391	Exon (ENSMUST00000155259.1/23969, exon 2 of 2)	17	27655509	27711482	55974	1	23969	30000	ENSMUSG00000040276	Pacsin1	protein kinase C and casein kinase substrate in neurons 1
chr19_7121072_7121572	chr19	7121072	7121572	501	*	-1.36923	0.000200905	-0.0218391	Intron (ENSMUST00000040261.6/107227, intron 3 of 10)	19	7092001	7105729	13729	2	396184	-15343	ENSMUSG00000047787	Flrt1	fibronectin leucine rich transmembrane protein 1
chr7_141755766_141756266	chr7	141755766	141756266	501	*	-1.36923	0.000200905	-0.0218391	Distal Intergenic	7	141788972	141819231	30260	1	17833	-32706	ENSMUSG00000037974	Muc5ac	mucin 5, subtypes A and C, tracheobronchial/gastric
chr10_128494407_128494907	chr10	128494407	128494907	501	*	-1	0.000210224	-0.0310345	Promoter (<=1kb)	10	128490860	128494145	3286	2	17904	-262	ENSMUSG00000090841	Myl6	myosin, light polypeptide 6, alkali, smooth muscle and non-muscle
chr11_69269520_69270020	chr11	69269520	69270020	501	*	-1	0.000210224	-0.0310345	Distal Intergenic	11	69218117	69237036	18920	2	14919	-32484	ENSMUSG00000020890	Gucy2e	guanylate cyclase 2e
chr5_92505926_92506426	chr5	92505926	92506426	501	*	-1	0.000210224	-0.0310345	Promoter (<=1kb)	5	92441314	92505637	64324	2	12492	-289	ENSMUSG00000029426	Scarb2	scavenger receptor class B, member 2
chr8_17534166_17534666	chr8	17534166	17534666	501	*	-1	0.000210224	-0.0310345	Promoter (<=1kb)	8	15892537	17535586	1643050	2	94109	920	ENSMUSG00000060924	Csmd1	CUB and Sushi multiple domains 1
chr10_98014960_98015460	chr10	98014960	98015460	501	*	-1.19794	0.000223484	-0.0252874	Distal Intergenic	10	97681414	97967090	285677	2	100038699	-47870	ENSMUSG00000074776	Gm10754	predicted gene 10754
chr16_5202602_5203102	chr16	5202602	5203102	501	*	-1.19794	0.000223484	-0.0252874	Promoter (<=1kb)	16	5195289	5204012	8724	2	27426	910	ENSMUSG00000023143	Nagpa	N-acetylglucosamine-1-phosphodiester alpha-N-acetylglucosaminidase
chr4_66401001_66401501	chr4	66401001	66401501	501	*	-1.19794	0.000223484	-0.0252874	Intron (ENSMUST00000084496.2/56079, intron 1 of 21)	4	65380803	66404611	1023809	2	56079	3110	ENSMUSG00000028373	Astn2	astrotactin 2
chr5_117242566_117243066	chr5	117242566	117243066	501	*	-1.19794	0.000223484	-0.0252874	Intron (ENSMUST00000111978.7/330177, intron 14 of 20)	5	117282654	117287625	4972	2	23980	44559	ENSMUSG00000032959	Pebp1	phosphatidylethanolamine binding protein 1
chr1_194148732_194149232	chr1	194148732	194149232	501	*	-1.02857	0.000227653	-0.0298851	Distal Intergenic	1	194212187	194222759	10573	2	74942	73527	ENSMUSG00000103692	4930503O07Rik	RIKEN cDNA 4930503O07 gene
chr15_102511795_102512295	chr15	102511795	102512295	501	*	-1.02857	0.000227653	-0.0298851	Intron (ENSMUST00000023812.9/26404, intron 1 of 13)	15	102497646	102517064	19419	2	26404	4769	ENSMUSG00000023050	Map3k12	mitogen-activated protein kinase kinase kinase 12
chr3_88324783_88325283	chr3	88324783	88325283	501	*	-1.02857	0.000227653	-0.0298851	Promoter (<=1kb)	3	88325023	88331313	6291	1	56700	0	ENSMUSG00000001418	Glmp	glycosylated lysosomal membrane protein
chr7_126821745_126822245	chr7	126821745	126822245	501	*	-1.02857	0.000227653	-0.0298851	Exon (ENSMUST00000205888.1/68952, exon 6 of 6)	7	126830468	126831639	1172	2	78118	9394	ENSMUSG00000045989	4930451I11Rik	RIKEN cDNA 4930451I11 gene
chr11_69621775_69622275	chr11	69621775	69622275	501	*	-1.0614	0.000238939	-0.0287356	Promoter (<=1kb)	11	69622024	69623870	1847	1	69215	0	ENSMUSG00000069835	Sat2	spermidine/spermine N1-acetyl transferase 2
chr14_118088714_118089214	chr14	118088714	118089214	501	*	-1.0614	0.000238939	-0.0287356	Distal Intergenic	14	118012790	118052244	39455	2	13190	-36470	ENSMUSG00000022129	Dct	dopachrome tautomerase
chr15_103503866_103504366	chr15	103503866	103504366	501	*	-1.0614	0.000238939	-0.0287356	Promoter (<=1kb)	15	103503034	103530052	27019	1	18574	832	ENSMUSG00000022489	Pde1b	phosphodiesterase 1B, Ca2+-calmodulin dependent
chr3_153085229_153085729	chr3	153085229	153085729	501	*	-1.0614	0.000238939	-0.0287356	Distal Intergenic	3	152817081	152982246	165166	2	26938	-102983	ENSMUSG00000039037	St6galnac5	ST6 (alpha-N-acetyl-neuraminyl-2,3-beta-galactosyl-1,3)-N-acetylgalactosaminide alpha-2,6-sialyltransferase 5
chr6_48553709_48554209	chr6	48553709	48554209	501	*	-1.0614	0.000238939	-0.0287356	Promoter (<=1kb)	6	48554796	48570722	15927	1	243371	-587	ENSMUSG00000073096	Lrrc61	leucine rich repeat containing 61
chr7_81705954_81706454	chr7	81705954	81706454	501	*	-1.0614	0.000238939	-0.0287356	Promoter (1-2kb)	7	81600481	81707527	107047	2	26557	1073	ENSMUSG00000025813	Homer2	homer scaffolding protein 2
chr8_72434922_72435422	chr8	72434922	72435422	501	*	-1.0614	0.000238939	-0.0287356	5' UTR	8	72424176	72443870	19695	2	73316	8448	ENSMUSG00000019732	Calr3	calreticulin 3
chr19_5715960_5716460	chr19	5715960	5716460	501	*	-1.14439	0.000239276	-0.0264368	Exon (ENSMUST00000049295.14/114601, exon 12 of 19)	19	5707376	5726317	18942	2	114601	9857	ENSMUSG00000024937	Ehbp1l1	EH domain binding protein 1-like 1
chr5_122627189_122627689	chr5	122627189	122627689	501	*	-1.14439	0.000239276	-0.0264368	Distal Intergenic	5	122550204	122614518	64315	2	12589	-12671	ENSMUSG00000029469	Ift81	intraflagellar transport 81
chr11_105944624_105945124	chr11	105944624	105945124	501	*	-1.09954	0.000243938	-0.0275862	Exon (ENSMUST00000195385.1/ENSMUST00000195385.1, exon 1 of 1)	11	105933702	105953336	19635	2	13056	8212	ENSMUSG00000019590	Cyb561	cytochrome b-561
chr11_115151979_115152479	chr11	115151979	115152479	501	*	-1.09954	0.000243938	-0.0275862	Intron (ENSMUST00000067754.10/58222, intron 2 of 8)	11	115163341	115181181	17841	1	26941	-10862	ENSMUSG00000020733	Slc9a3r1	solute carrier family 9 (sodium/hydrogen exchanger), member 3 regulator 1
chr14_30564440_30564940	chr14	30564440	30564940	501	*	-1.09954	0.000243938	-0.0275862	Intron (ENSMUST00000022529.7/21881, intron 4 of 13)	14	30572149	30572208	60	1	100526475	-7209	ENSMUSG00000093156	Mir3076	microRNA 3076
chr4_129049566_129050066	chr4	129049566	129050066	501	*	-1.09954	0.000243938	-0.0275862	Distal Intergenic	4	129058271	129085886	27616	1	75234	-8205	ENSMUSG00000028793	Rnf19b	ring finger protein 19B
chr4_150147146_150147646	chr4	150147146	150147646	501	*	-1.09954	0.000243938	-0.0275862	Promoter (1-2kb)	4	150148972	150168482	19511	1	435818	-1326	ENSMUSG00000062064	Slc2a7	solute carrier family 2 (facilitated glucose transporter), member 7
chr10_122803857_122804357	chr10	122803857	122804357	501	*	-1.39855	0.00025927	-0.0206897	Intron (ENSMUST00000162853.7/319468, intron 3 of 5)	10	122679315	122679415	101	1	102466884	124542	ENSMUSG00000099225	Mir8104	microRNA 8104
chr10_128590303_128590803	chr10	128590303	128590803	501	*	-1.39855	0.00025927	-0.0206897	Promoter (<=1kb)	10	128567523	128589652	22130	2	13867	-651	ENSMUSG00000018166	Erbb3	erb-b2 receptor tyrosine kinase 3
chr11_31872214_31872714	chr11	31872214	31872714	501	*	-1.39855	0.00025927	-0.0206897	Promoter (<=1kb)	11	31872211	31935634	63424	1	67579	3	ENSMUSG00000020300	Cpeb4	cytoplasmic polyadenylation element binding protein 4
chr11_78060334_78060834	chr11	78060334	78060834	501	*	-1.39855	0.00025927	-0.0206897	3' UTR	11	78073005	78073070	66	1	387162	-12171	ENSMUSG00000065401	Mir144	microRNA 144
chr12_24252423_24252923	chr12	24252423	24252923	501	*	-1.39855	0.00025927	-0.0206897	Distal Intergenic	12	24043202	24097246	54045	2	66808	-155177	ENSMUSG00000073158	9030624G23Rik	RIKEN cDNA 9030624G23 gene
chr12_104806730_104807230	chr12	104806730	104807230	501	*	-1.39855	0.00025927	-0.0206897	Intron (ENSMUST00000109936.2/94040, intron 1 of 12)	12	104687742	104751952	64211	2	192119	-54778	ENSMUSG00000041415	Dicer1	dicer 1, ribonuclease type III
chr15_99664062_99664562	chr15	99664062	99664562	501	*	-1.39855	0.00025927	-0.0206897	Distal Intergenic	15	99670368	99701130	30763	1	11419	-5806	ENSMUSG00000023017	Asic1	acid-sensing (proton-gated) ion channel 1
chr18_23460833_23461333	chr18	23460833	23461333	501	*	-1.39855	0.00025927	-0.0206897	Intron (ENSMUST00000222515.1/13527, intron 1 of 3)	18	23415135	23659715	244581	1	13527	45698	ENSMUSG00000024302	Dtna	dystrobrevin alpha
chr2_30707357_30707857	chr2	30707357	30707857	501	*	-1.39855	0.00025927	-0.0206897	Distal Intergenic	2	30721210	30721293	84	1	100526499	-13353	ENSMUSG00000093091	Mir3089	microRNA 3089
chr4_124860390_124860890	chr4	124860390	124860890	501	*	-1.39855	0.00025927	-0.0206897	Promoter (1-2kb)	4	124855239	124862171	6933	2	215090	1281	ENSMUSG00000042763	Maneal	mannosidase, endo-alpha-like
chr8_111662397_111662897	chr8	111662397	111662897	501	*	-1.39855	0.00025927	-0.0206897	Intron (ENSMUST00000212072.1/22640, intron 2 of 3)	8	111643401	111671011	27611	1	22640	18996	ENSMUSG00000055835	Zfp1	zinc finger protein 1
chr9_96734163_96734663	chr9	96734163	96734663	501	*	-1.39855	0.00025927	-0.0206897	Intron (ENSMUST00000152594.7/245007, intron 2 of 5)	9	96729851	96752727	22877	2	319859	18064	NA	E030011O05Rik	RIKEN cDNA E030011O05 gene
chrX_13524361_13524861	chrX	13524361	13524861	501	*	-1.39855	0.00025927	-0.0206897	Exon (ENSMUST00000128095.2/12361, exon 4 of 5)	20	13466110	13489313	23204	1	236690	58251	ENSMUSG00000051228	Nyx	nyctalopin
chr15_27866116_27866616	chr15	27866116	27866616	501	*	-1.28011	0.000262223	-0.0229885	Exon (ENSMUST00000228406.1/ENSMUST00000228406.1, exon 1 of 1)	15	27730651	28025848	295198	2	223435	159232	ENSMUSG00000022263	Trio	triple functional domain (PTPRF interacting)
chr15_32244536_32245036	chr15	32244536	32245036	501	*	-1.28011	0.000262223	-0.0229885	Promoter (<=1kb)	15	32240565	32244662	4098	2	100616095	0	ENSMUSG00000096956	Snhg18	small nucleolar RNA host gene 18
chr18_25563131_25563631	chr18	25563131	25563631	501	*	-1.28011	0.000262223	-0.0229885	Intron (ENSMUST00000115816.2/108013, intron 2 of 12)	18	25477632	25754157	276526	2	108013	190526	ENSMUSG00000024268	Celf4	CUGBP, Elav-like family member 4
chr2_4187479_4187979	chr2	4187479	4187979	501	*	-1.28011	0.000262223	-0.0229885	Intron (ENSMUST00000177457.7/209630, intron 2 of 24)	2	4132063	4141141	9079	2	73489	-46338	ENSMUSG00000084859	1700080N15Rik	RIKEN cDNA 1700080N15 gene
chr2_130769345_130769845	chr2	130769345	130769845	501	*	-1.28011	0.000262223	-0.0229885	Intron (ENSMUST00000044766.14/228602, intron 17 of 36)	2	130803501	130803982	482	2	100043766	34137	NA	Gm14057	Ppp1r14c pseudogene
chr4_54668388_54668888	chr4	54668388	54668888	501	*	-1.28011	0.000262223	-0.0229885	Intron (ENSMUST00000127709.1/ENSMUST00000127709.1, intron 1 of 1)	4	54945048	55083563	138516	1	242466	-276160	ENSMUSG00000060206	Zfp462	zinc finger protein 462
chr5_36323501_36324001	chr5	36323501	36324001	501	*	-1.28011	0.000262223	-0.0229885	Intron (ENSMUST00000037370.13/81840, intron 1 of 26)	5	36301570	36301628	59	1	102465792	21931	ENSMUSG00000098884	Mir7689	microRNA 7689
chr6_72789391_72789891	chr6	72789391	72789891	501	*	-1.28011	0.000262223	-0.0229885	Promoter (<=1kb)	6	72626378	72789254	162877	2	21415	-137	ENSMUSG00000055799	Tcf7l1	transcription factor 7 like 1 (T cell specific, HMG box)
chr6_73249087_73249587	chr6	73249087	73249587	501	*	-1.28011	0.000262223	-0.0229885	Promoter (<=1kb)	6	73248382	73276911	28530	1	56451	705	ENSMUSG00000052738	Suclg1	succinate-CoA ligase, GDP-forming, alpha subunit
chr7_126948271_126948771	chr7	126948271	126948771	501	*	-1.28011	0.000262223	-0.0229885	Promoter (<=1kb)	7	126945567	126949582	4016	2	233879	811	ENSMUSG00000046378	Asphd1	aspartate beta-hydroxylase domain containing 1
chr8_61479775_61480275	chr8	61479775	61480275	501	*	-1.28011	0.000262223	-0.0229885	Distal Intergenic	8	61487734	61506694	18961	1	234309	-7459	ENSMUSG00000031641	Cbr4	carbonyl reductase 4
chr16_91269433_91269933	chr16	91269433	91269933	501	*	-1	0.000299904	-0.0298851	Promoter (<=1kb)	16	91269772	91271933	2162	1	50914	0	ENSMUSG00000046160	Olig1	oligodendrocyte transcription factor 1
chr17_24720258_24720758	chr17	24720258	24720758	501	*	-1	0.000299904	-0.0298851	Promoter (<=1kb)	17	24720772	24720905	134	1	104366	-14	ENSMUSG00000077709	Snora64	small nucleolar RNA, H/ACA box 64
chr19_9027765_9028265	chr19	9027765	9028265	501	*	-1	0.000299904	-0.0298851	Intron (ENSMUST00000237912.1/66395, intron 4 of 6)	19	8989284	9076914	87631	1	66395	38481	ENSMUSG00000069833	Ahnak	AHNAK nucleoprotein (desmoyokin)
chr2_107290351_107290851	chr2	107290351	107290851	501	*	-1	0.000299904	-0.0298851	Promoter (<=1kb)	2	107290639	107298502	7864	1	16492	0	ENSMUSG00000042604	Kcna4	potassium voltage-gated channel, shaker-related subfamily, member 4
chr7_81763173_81763673	chr7	81763173	81763673	501	*	-1	0.000299904	-0.0298851	Promoter (<=1kb)	7	81762925	81769491	6567	1	67148	248	ENSMUSG00000038646	Ramac	RNA guanine-7 methyltransferase activating subunit
chr8_84946931_84947431	chr8	84946931	84947431	501	*	-1	0.000299904	-0.0298851	Promoter (<=1kb)	8	84946991	84956603	9613	1	234542	0	ENSMUSG00000048617	Rtbdn	retbindin
chr1_133087557_133088057	chr1	133087557	133088057	501	*	-1.20945	0.000307303	-0.0241379	Intron (ENSMUST00000077730.6/240752, intron 15 of 32)	1	133045667	133108687	63021	1	240752	41890	ENSMUSG00000026447	Pik3c2b	phosphatidylinositol-4-phosphate 3-kinase catalytic subunit type 2 beta
chr13_104108521_104109021	chr13	104108521	104109021	501	*	-1.20945	0.000307303	-0.0241379	Promoter (<=1kb)	13	104023057	104109614	86558	2	75805	593	ENSMUSG00000021710	Nln	neurolysin (metallopeptidase M3 family)
chr14_8080682_8081182	chr14	8080682	8081182	501	*	-1.20945	0.000307303	-0.0241379	Promoter (<=1kb)	14	8080367	8091834	11468	1	67053	315	ENSMUSG00000023156	Rpp14	ribonuclease P 14 subunit
chr15_76472453_76472953	chr15	76472453	76472953	501	*	-1.20945	0.000307303	-0.0241379	Intron (ENSMUST00000023217.10/12181, intron 2 of 15)	15	76452989	76477277	24289	2	12181	4324	ENSMUSG00000022557	Bop1	block of proliferation 1
chr15_86576727_86577227	chr15	86576727	86577227	501	*	-1.20945	0.000307303	-0.0241379	Distal Intergenic	15	86214459	86498503	284045	1	223754	362268	ENSMUSG00000051864	Tbc1d22a	TBC1 domain family, member 22a
chr16_77788362_77788862	chr16	77788362	77788862	501	*	-1.20945	0.000307303	-0.0241379	Distal Intergenic	16	77646273	77649426	3154	1	723952	142089	ENSMUSG00000065472	Mir125b-2	microRNA 125b-2
chr2_24405590_24406090	chr2	24405590	24406090	501	*	-1.20945	0.000307303	-0.0241379	Exon (ENSMUST00000102942.7/215632, exon 17 of 18)	2	24367580	24414954	47375	1	215632	38010	ENSMUSG00000026979	Psd4	pleckstrin and Sec7 domain containing 4
chr4_120120384_120120884	chr4	120120384	120120884	501	*	-1.20945	0.000307303	-0.0241379	Intron (ENSMUST00000106307.8/16656, intron 5 of 8)	4	120161206	120167360	6155	1	13615	-40322	ENSMUSG00000028635	Edn2	endothelin 2
chr4_142083610_142084110	chr4	142083610	142084110	501	*	-1.20945	0.000307303	-0.0241379	Promoter (<=1kb)	4	142083972	142088099	4128	1	100038693	0	ENSMUSG00000073728	Tmem51os1	Tmem51 opposite strand 1
chr5_101857018_101857518	chr5	101857018	101857518	501	*	-1.20945	0.000307303	-0.0241379	Intron (ENSMUST00000053177.13/72145, intron 55 of 66)	5	101765130	101823858	58729	1	74596	91888	ENSMUSG00000029330	Cds1	CDP-diacylglycerol synthase 1
chr6_142457906_142458406	chr6	142457906	142458406	501	*	-1.20945	0.000307303	-0.0241379	Intron (ENSMUST00000032371.7/232493, intron 4 of 16)	6	142422613	142473109	50497	2	232493	14703	ENSMUSG00000030244	Gys2	glycogen synthase 2
chr8_104340575_104341075	chr8	104340575	104341075	501	*	-1.20945	0.000307303	-0.0241379	Promoter (1-2kb)	8	104339410	104347672	8263	1	68119	1165	ENSMUSG00000031875	Cmtm3	CKLF-like MARVEL transmembrane domain containing 3
chr8_124264545_124265045	chr8	124264545	124265045	501	*	-1.20945	0.000307303	-0.0241379	Intron (ENSMUST00000127664.1/108148, intron 1 of 15)	8	124369049	124439658	70610	2	209966	174613	ENSMUSG00000050751	Pgbd5	piggyBac transposable element derived 5
chr9_77952960_77953460	chr9	77952960	77953460	501	*	-1.20945	0.000307303	-0.0241379	Intron (ENSMUST00000034904.13/68801, intron 1 of 7)	9	77917364	77984519	67156	1	68801	35596	ENSMUSG00000032349	Elovl5	ELOVL family member 5, elongation of long chain fatty acids (yeast)
chr11_104289620_104290120	chr11	104289620	104290120	501	*	-1.02975	0.000322655	-0.0287356	Exon (ENSMUST00000100347.10/17762, exon 4 of 12)	11	104231390	104332090	100701	1	17762	58230	ENSMUSG00000018411	Mapt	microtubule-associated protein tau
chr17_8368412_8368912	chr17	8368412	8368912	501	*	-1.02975	0.000322655	-0.0287356	Intron (ENSMUST00000140890.2/21331, intron 1 of 5)	17	8337459	8344113	6655	1	320111	30953	ENSMUSG00000055945	Prr18	proline rich 18
chr2_163047962_163048462	chr2	163047962	163048462	501	*	-1.02975	0.000322655	-0.0287356	Distal Intergenic	2	163054687	163084688	30002	1	17865	-6225	ENSMUSG00000017861	Mybl2	myeloblastosis oncogene-like 2
chr4_137724726_137725226	chr4	137724726	137725226	501	*	-1.02975	0.000322655	-0.0287356	Exon (ENSMUST00000105835.7/110351, exon 19 of 25)	4	137696979	137706606	9628	2	69808	-18120	ENSMUSG00000087476	Rap1gapos	RAP1 GTPase activating protein, opposite strand
chr8_22398992_22399492	chr8	22398992	22399492	501	*	-1.02975	0.000322655	-0.0287356	Promoter (<=1kb)	8	22398721	22399596	876	1	69108	271	ENSMUSG00000099825	1810012K16Rik	RIKEN cDNA 1810012K16 gene
chr9_108078459_108078959	chr9	108078459	108078959	501	*	-1.02975	0.000322655	-0.0287356	Promoter (1-2kb)	9	108080436	108085003	4568	1	15235	-1477	ENSMUSG00000032591	Mst1	macrophage stimulating 1 (hepatocyte growth factor-like)
chr1_39645773_39646273	chr1	39645773	39646273	501	*	-1.43296	0.000326567	-0.0195402	Intron (ENSMUST00000053355.5/263764, intron 2 of 3)	1	39618406	39651474	33069	2	263764	5201	ENSMUSG00000050967	Creg2	cellular repressor of E1A-stimulated genes 2
chr1_42261840_42262340	chr1	42261840	42262340	501	*	-1.43296	0.000326567	-0.0195402	Exon (ENSMUST00000189138.1/ENSMUST00000189138.1, exon 1 of 1)	1	42590782	42694842	104061	2	66297	432502	ENSMUSG00000060424	Pantr1	POU domain, class 3, transcription factor 3 adjacent noncoding transcript 1
chr1_88869778_88870278	chr1	88869778	88870278	501	*	-1.43296	0.000326567	-0.0195402	Intron (ENSMUST00000185425.1/ENSMUST00000185425.1, intron 1 of 1)	1	88754890	88755736	847	1	78650	114888	ENSMUSG00000097398	Platr5	pluripotency associated transcript 5
chr1_152006388_152006888	chr1	152006388	152006888	501	*	-1.43296	0.000326567	-0.0195402	5' UTR	1	151852403	152090125	237723	2	69399	83237	ENSMUSG00000032666	1700025G04Rik	RIKEN cDNA 1700025G04 gene
chr11_101231550_101232050	chr11	101231550	101232050	501	*	-1.43296	0.000326567	-0.0195402	Distal Intergenic	11	101191115	101226463	35349	2	14055	-5087	ENSMUSG00000006920	Ezh1	enhancer of zeste 1 polycomb repressive complex 2 subunit
chr14_66909138_66909638	chr14	66909138	66909638	501	*	-1.43296	0.000326567	-0.0195402	Promoter (1-2kb)	14	66911170	66921023	9854	1	239157	-1532	ENSMUSG00000046204	Pnma2	paraneoplastic antigen MA2
chr15_86173683_86174183	chr15	86173683	86174183	501	*	-1.43296	0.000326567	-0.0195402	Intron (ENSMUST00000044332.15/223753, intron 1 of 12)	15	86185728	86187152	1425	1	102638208	-11545	ENSMUSG00000086424	Gm15569	predicted gene 15569
chr15_101236837_101237337	chr15	101236837	101237337	501	*	-1.43296	0.000326567	-0.0195402	Distal Intergenic	15	101221195	101225186	3992	2	380977	-11651	ENSMUSG00000097915	A330009N23Rik	RIKEN cDNA A330009N23 gene
chr2_11774304_11774804	chr2	11774304	11774804	501	*	-1.43296	0.000326567	-0.0195402	Promoter (2-3kb)	2	11742573	11777582	35010	2	50755	2778	ENSMUSG00000058594	Fbh1	F-box DNA helicase 1
chr2_69428073_69428573	chr2	69428073	69428573	501	*	-1.43296	0.000326567	-0.0195402	Intron (ENSMUST00000080953.11/14725, intron 77 of 78)	2	69380445	69404533	24089	1	241452	47628	ENSMUSG00000027068	Dhrs9	dehydrogenase/reductase (SDR family) member 9
chr2_158204038_158204538	chr2	158204038	158204538	501	*	-1.43296	0.000326567	-0.0195402	Intron (ENSMUST00000103121.9/228846, intron 10 of 15)	2	158192008	158195749	3742	1	73399	12030	ENSMUSG00000078957	1700060C20Rik	RIKEN cDNA 1700060C20 gene
chr3_65380080_65380580	chr3	65380080	65380580	501	*	-1.43296	0.000326567	-0.0195402	3' UTR	3	65379655	65392623	12969	2	67437	12043	ENSMUSG00000027828	Ssr3	signal sequence receptor, gamma
chr5_100167116_100167616	chr5	100167116	100167616	501	*	-1.43296	0.000326567	-0.0195402	Distal Intergenic	5	100077872	100159808	81937	2	231503	-7308	ENSMUSG00000050640	Tmem150c	transmembrane protein 150C
chr5_120206222_120206722	chr5	120206222	120206722	501	*	-1.43296	0.000326567	-0.0195402	Distal Intergenic	5	120121096	120139263	18168	2	100503427	-66959	ENSMUSG00000097368	Gm10390	predicted gene 10390
chr6_8413917_8414417	chr6	8413917	8414417	501	*	-1.43296	0.000326567	-0.0195402	Intron (ENSMUST00000159335.7/100036521, intron 3 of 4)	6	8491040	8509138	18099	2	320312	94721	ENSMUSG00000087305	A430035B10Rik	RIKEN cDNA A430035B10 gene
chr8_68820461_68820961	chr8	68820461	68820961	501	*	-1.43296	0.000326567	-0.0195402	Exon (ENSMUST00000034328.12/70885, exon 15 of 17)	8	68793929	68829410	35482	1	70885	26532	ENSMUSG00000031864	Ints10	integrator complex subunit 10
chr9_50438045_50438545	chr9	50438045	50438545	501	*	-1.43296	0.000326567	-0.0195402	Distal Intergenic	9	50494525	50505482	10958	1	76509	-55980	ENSMUSG00000032068	Plet1	placenta expressed transcript 1
chr1_5916616_5917116	chr1	5916616	5917116	501	*	-1.152	0.000332162	-0.0252874	Promoter (<=1kb)	1	5913707	5917398	3692	2	226304	282	ENSMUSG00000033774	Npbwr1	neuropeptides B/W receptor 1
chr19_47325840_47326340	chr19	47325840	47326340	501	*	-1.152	0.000332162	-0.0252874	Intron (ENSMUST00000081619.9/14218, intron 6 of 14)	19	47273519	47273589	71	2	102466782	-52251	ENSMUSG00000098786	Mir6995	microRNA 6995
chr3_152107572_152108072	chr3	152107572	152108072	501	*	-1.152	0.000332162	-0.0252874	Exon (ENSMUST00000152283.7/54120, exon 2 of 4)	3	152093533	152166230	72698	2	54120	58158	ENSMUSG00000039131	Gipc2	GIPC PDZ domain containing family, member 2
chr1_193484807_193485307	chr1	193484807	193485307	501	*	-1.06413	0.000334865	-0.0275862	Distal Intergenic	1	193507463	193507530	68	2	387201	22223	ENSMUSG00000065533	Mir205	microRNA 205
chr15_98954611_98955111	chr15	98954611	98955111	501	*	-1.06413	0.000334865	-0.0275862	Promoter (<=1kb)	15	98949837	98953703	3867	2	22142	-908	ENSMUSG00000072235	Tuba1a	tubulin, alpha 1A
chr2_31256533_31257033	chr2	31256533	31257033	501	*	-1.06413	0.000334865	-0.0275862	Intron (ENSMUST00000000199.7/14299, intron 1 of 7)	2	31245823	31295989	50167	1	14299	10710	ENSMUSG00000062661	Ncs1	neuronal calcium sensor 1
chr7_44441091_44441591	chr7	44441091	44441591	501	*	-1.06413	0.000334865	-0.0275862	Intron (ENSMUST00000127790.7/272381, intron 1 of 2)	7	44429018	44463351	34334	1	272381	12073	ENSMUSG00000047085	Lrrc4b	leucine rich repeat containing 4B
chr10_25397724_25398224	chr10	25397724	25398224	501	*	-1.10434	0.000338969	-0.0264368	Intron (ENSMUST00000053748.15/13822, intron 1 of 19)	10	25359798	25523519	163722	1	13822	37926	ENSMUSG00000019978	Epb41l2	erythrocyte membrane protein band 4.1 like 2
chr11_76065629_76066129	chr11	76065629	76066129	501	*	-1.10434	0.000338969	-0.0264368	Intron (ENSMUST00000056601.10/68299, intron 18 of 21)	11	76019194	76027782	8589	2	76566	-37847	ENSMUSG00000020846	Rflnb	refilin B
chr12_86918051_86918551	chr12	86918051	86918551	501	*	-1.10434	0.000338969	-0.0264368	Distal Intergenic	12	86947043	86965362	18320	1	217732	-28492	ENSMUSG00000034157	Cipc	CLOCK interacting protein, circadian
chr12_100437781_100438281	chr12	100437781	100438281	501	*	-1.10434	0.000338969	-0.0264368	Intron (ENSMUST00000062957.7/104718, intron 5 of 19)	12	100300770	100520826	220057	2	104718	82545	ENSMUSG00000033530	Ttc7b	tetratricopeptide repeat domain 7B
chr13_94816288_94816788	chr13	94816288	94816788	501	*	-1.10434	0.000338969	-0.0264368	Intron (ENSMUST00000046644.6/21371, intron 1 of 3)	13	94788910	94842922	54013	1	21371	27378	ENSMUSG00000042043	Tbca	tubulin cofactor A
chr17_7827082_7827582	chr17	7827082	7827582	501	*	-1.10434	0.000338969	-0.0264368	Promoter (<=1kb)	17	7738569	7827302	88734	2	68655	0	ENSMUSG00000071984	Fndc1	fibronectin type III domain containing 1
chr6_127266067_127266567	chr6	127266067	127266567	501	*	-1.10434	0.000338969	-0.0264368	Distal Intergenic	6	127296186	127307967	11782	2	232386	41400	ENSMUSG00000107153	Gm38404	predicted gene, 38404
chr8_3676832_3677332	chr8	3676832	3677332	501	*	-1.10434	0.000338969	-0.0264368	Promoter (<=1kb)	8	3676299	3681255	4957	1	66682	533	ENSMUSG00000040236	Trappc5	trafficking protein particle complex 5
chr8_30916123_30916623	chr8	30916123	30916623	501	*	-1.10434	0.000338969	-0.0264368	Distal Intergenic	8	31089471	31097047	7577	1	66959	-172848	ENSMUSG00000039661	Dusp26	dual specificity phosphatase 26 (putative)
chr1_134302379_134302879	chr1	134302379	134302879	501	*	-1.29956	0.000344769	-0.0218391	Intron (ENSMUST00000168515.7/68507, intron 25 of 28)	1	134289989	134292548	2560	1	17928	12390	ENSMUSG00000026459	Myog	myogenin
chr10_81570018_81570518	chr10	81570018	81570518	501	*	-1.29956	0.000344769	-0.0218391	Distal Intergenic	10	81574561	81590845	16285	1	21886	-4043	ENSMUSG00000034771	Tle2	transducin-like enhancer of split 2
chr11_100512300_100512800	chr11	100512300	100512800	501	*	-1.29956	0.000344769	-0.0218391	Intron (ENSMUST00000107389.7/104112, intron 11 of 28)	11	100476353	100528000	51648	2	104112	15200	ENSMUSG00000020917	Acly	ATP citrate lyase
chr12_3889030_3889530	chr12	3889030	3889530	501	*	-1.29956	0.000344769	-0.0218391	Intron (ENSMUST00000020991.14/13435, intron 6 of 22)	12	3859293	3862244	2952	2	100038522	-26786	ENSMUSG00000073242	Dnmt3aos	DNA methyltransferase 3A, opposite strand
chr15_13256845_13257345	chr15	13256845	13257345	501	*	-1.29956	0.000344769	-0.0218391	Distal Intergenic	15	13028701	13173675	144975	2	12563	-83170	ENSMUSG00000039385	Cdh6	cadherin 6
chr15_71916794_71917294	chr15	71916794	71917294	501	*	-1.29956	0.000344769	-0.0218391	Intron (ENSMUST00000229585.1/69700, intron 12 of 52)	15	71795795	72034227	238433	2	69700	116933	ENSMUSG00000079022	Col22a1	collagen, type XXII, alpha 1
chr17_28420054_28420554	chr17	28420054	28420554	501	*	-1.29956	0.000344769	-0.0218391	Intron (ENSMUST00000079413.10/14229, intron 5 of 10)	17	28351515	28365222	13708	2	22157	-54832	ENSMUSG00000037446	Tulp1	tubby like protein 1
chr18_13900808_13901308	chr18	13900808	13901308	501	*	-1.29956	0.000344769	-0.0218391	Exon (ENSMUST00000234954.1/ENSMUST00000234954.1, exon 1 of 1)	18	13687013	13972787	285775	2	225207	71479	ENSMUSG00000024420	Zfp521	zinc finger protein 521
chr19_4612683_4613183	chr19	4612683	4613183	501	*	-1.29956	0.000344769	-0.0218391	Promoter (2-3kb)	19	4611785	4615667	3883	2	225875	2484	ENSMUSG00000045045	Lrfn4	leucine rich repeat and fibronectin type III domain containing 4
chr2_156478741_156479241	chr2	156478741	156479241	501	*	-1.29956	0.000344769	-0.0218391	Intron (ENSMUST00000103137.9/13821, intron 2 of 22)	2	156420909	156543214	122306	1	13821	57832	ENSMUSG00000027624	Epb41l1	erythrocyte membrane protein band 4.1 like 1
chr4_4140018_4140518	chr4	4140018	4140518	501	*	-1.29956	0.000344769	-0.0218391	Promoter (1-2kb)	4	4133531	4138819	5289	2	18619	-1199	ENSMUSG00000045573	Penk	preproenkephalin
chr4_22494335_22494835	chr4	22494335	22494835	501	*	1.29956	0.000344769	0.0218391	Distal Intergenic	4	22490548	22493126	2579	1	105500046	3787	ENSMUSG00000107859	Gm30731	predicted gene, 30731
chr4_130790138_130790638	chr4	130790138	130790638	501	*	-1.29956	0.000344769	-0.0218391	Promoter (1-2kb)	4	130792537	130826319	33783	1	20970	-1899	ENSMUSG00000025743	Sdc3	syndecan 3
chr5_137339679_137340179	chr5	137339679	137340179	501	*	-1.29956	0.000344769	-0.0218391	Distal Intergenic	5	137314558	137333597	19040	2	83704	-6082	ENSMUSG00000037344	Slc12a9	solute carrier family 12 (potassium/chloride transporters), member 9
chr5_140145080_140145580	chr5	140145080	140145580	501	*	-1.29956	0.000344769	-0.0218391	Intron (ENSMUST00000110829.6/17120, intron 11 of 16)	5	140008689	140321552	312864	2	17120	175972	ENSMUSG00000029554	Mad1l1	MAD1 mitotic arrest deficient 1-like 1
chr6_97106716_97107216	chr6	97106716	97107216	501	*	-1.29956	0.000344769	-0.0218391	Downstream (2-3kb)	6	97110024	97149182	39159	2	101351	41966	ENSMUSG00000035245	Eogt	EGF domain-specific O-linked N-acetylglucosamine (GlcNAc) transferase
chr6_120579855_120580355	chr6	120579855	120580355	501	*	-1.29956	0.000344769	-0.0218391	Exon (ENSMUST00000204159.1/ENSMUST00000204159.1, exon 1 of 1)	6	120554796	120562879	8084	1	73505	25059	NA	1700072O05Rik	RIKEN cDNA 1700072O05 gene
chr7_28435588_28436088	chr7	28435588	28436088	501	*	-1.29956	0.000344769	-0.0218391	Promoter (1-2kb)	7	28437447	28448233	10787	1	63986	-1359	ENSMUSG00000060791	Gmfg	glia maturation factor, gamma
chr7_30232793_30233293	chr7	30232793	30233293	501	*	-1.29956	0.000344769	-0.0218391	Promoter (<=1kb)	7	30224131	30232272	8142	2	66411	-521	ENSMUSG00000006095	Tbcb	tubulin folding cofactor B
chr7_43580463_43580963	chr7	43580463	43580963	501	*	-1.29956	0.000344769	-0.0218391	Promoter (<=1kb)	7	43579610	43593235	13626	1	210105	853	ENSMUSG00000030469	Zfp719	zinc finger protein 719
chr8_22434366_22434866	chr8	22434366	22434866	501	*	-1.29956	0.000344769	-0.0218391	Distal Intergenic	8	22411361	22429665	18305	1	57312	23005	ENSMUSG00000031533	Mrps31	mitochondrial ribosomal protein S31
chr9_41889841_41890341	chr9	41889841	41890341	501	*	-1.29956	0.000344769	-0.0218391	Intron (ENSMUST00000217258.1/ENSMUST00000217258.1, intron 1 of 2)	9	41964720	42124297	159578	2	20660	233956	ENSMUSG00000049313	Sorl1	sortilin-related receptor, LDLR class A repeats-containing
chr9_118506879_118507379	chr9	118506879	118507379	501	*	-1.29956	0.000344769	-0.0218391	Promoter (<=1kb)	9	118506267	118582519	76253	1	54214	612	ENSMUSG00000038708	Golga4	golgi autoantigen, golgin subfamily a, 4
chr1_61967060_61967560	chr1	61967060	61967560	501	*	-1.90689	0.000386187	-0.0126437	Intron (ENSMUST00000138768.7/72823, intron 2 of 4)	1	62131195	62136109	4915	2	105243940	168549	ENSMUSG00000085019	Pard3bos2	par-3 family cell polarity regulator beta, opposite strand 2
chr10_77941827_77942327	chr10	77941827	77942327	501	*	1.90689	0.000386187	0.0126437	Intron (ENSMUST00000105401.8/28240, intron 10 of 33)	10	77907722	77970563	62842	2	28240	28236	ENSMUSG00000009292	Trpm2	transient receptor potential cation channel, subfamily M, member 2
chr10_86385279_86385779	chr10	86385279	86385779	501	*	-1.90689	0.000386187	-0.0126437	Intron (ENSMUST00000120638.7/27204, intron 4 of 13)	10	86300372	86349506	49135	1	21859	84907	ENSMUSG00000020044	Timp3	tissue inhibitor of metalloproteinase 3
chr10_125310844_125311344	chr10	125310844	125311344	501	*	-1.90689	0.000386187	-0.0126437	Intron (ENSMUST00000211781.1/20503, intron 1 of 5)	10	125219270	125389465	170196	2	20503	78121	ENSMUSG00000020102	Slc16a7	solute carrier family 16 (monocarboxylic acid transporters), member 7
chr11_59179193_59179693	chr11	59179193	59179693	501	*	-1.90689	0.000386187	-0.0126437	Intron (ENSMUST00000108793.8/118454, intron 1 of 1)	11	59175568	59183213	7646	2	118454	3520	ENSMUSG00000043448	Gjc2	gap junction protein, gamma 2
chr11_82813854_82814354	chr11	82813854	82814354	501	*	1.90689	0.000386187	0.0126437	Intron (ENSMUST00000074515.10/67338, intron 2 of 6)	11	82781108	82804274	23167	1	16882	32746	ENSMUSG00000020697	Lig3	ligase III, DNA, ATP-dependent
chr11_97069987_97070487	chr11	97069987	97070487	501	*	-1.90689	0.000386187	-0.0126437	Distal Intergenic	11	97063768	97063874	107	1	102465893	6219	ENSMUSG00000098769	Mir8103	microRNA 8103
chr11_103053154_103053654	chr11	103053154	103053654	501	*	-1.90689	0.000386187	-0.0126437	Intron (ENSMUST00000021314.7/18107, intron 4 of 11)	11	102994047	103028304	34258	2	68087	-24850	ENSMUSG00000020935	Dcakd	dephospho-CoA kinase domain containing
chr11_119089499_119089999	chr11	119089499	119089999	501	*	-1.90689	0.000386187	-0.0126437	Distal Intergenic	11	119077573	119086221	8649	2	12418	-3278	ENSMUSG00000039989	Cbx4	chromobox 4
chr13_10002959_10003459	chr13	10002959	10003459	501	*	-1.90689	0.000386187	-0.0126437	Intron (ENSMUST00000187510.6/12671, intron 4 of 4)	13	9684833	9765330	80498	2	66505	-237629	ENSMUSG00000021156	Zmynd11	zinc finger, MYND domain containing 11
chr13_74036687_74037187	chr13	74036687	74037187	501	*	-1.90689	0.000386187	-0.0126437	3' UTR	13	74036500	74062299	25800	2	74470	25112	ENSMUSG00000021572	Cep72	centrosomal protein 72
chr14_59780853_59781353	chr14	59780853	59781353	501	*	1.90689	0.000386187	0.0126437	Intron (ENSMUST00000080368.12/50769, intron 29 of 35)	14	59625308	59631660	6353	1	219134	155545	ENSMUSG00000044461	Shisa2	shisa family member 2
chr14_64795351_64795851	chr14	64795351	64795851	501	*	-1.90689	0.000386187	-0.0126437	Intron (ENSMUST00000100473.4/16554, intron 37 of 39)	14	64647265	64809617	162353	1	16554	148086	ENSMUSG00000060012	Kif13b	kinesin family member 13B
chr14_77546501_77547001	chr14	77546501	77547001	501	*	-1.90689	0.000386187	-0.0126437	Intron (ENSMUST00000022589.8/239188, intron 7 of 18)	14	77479483	77506868	27386	2	629678	-39633	ENSMUSG00000067973	Gm6994	predicted gene 6994
chr15_80764641_80765141	chr15	80764641	80765141	501	*	-1.90689	0.000386187	-0.0126437	Intron (ENSMUST00000067689.8/213988, intron 3 of 24)	15	80711313	80941085	229773	1	213988	53328	ENSMUSG00000047888	Tnrc6b	trinucleotide repeat containing 6b
chr16_4374164_4374664	chr16	4374164	4374664	501	*	-1.90689	0.000386187	-0.0126437	Intron (ENSMUST00000117801.7/11515, intron 2 of 10)	16	4287529	4420498	132970	2	11515	45834	ENSMUSG00000005580	Adcy9	adenylate cyclase 9
chr16_11668172_11668672	chr16	11668172	11668672	501	*	-1.90689	0.000386187	-0.0126437	Intron (ENSMUST00000180792.7/74478, intron 18 of 20)	16	11778429	11781500	3072	1	73761	-109757	NA	4833415N18Rik	RIKEN cDNA 4833415N18 gene
chr17_66110391_66110891	chr17	66110391	66110891	501	*	-1.90689	0.000386187	-0.0126437	Promoter (<=1kb)	17	66111545	66120503	8959	1	68767	-654	ENSMUSG00000024101	Washc1	WASH complex subunit 1
chr17_88556609_88557109	chr17	88556609	88557109	501	*	-1.90689	0.000386187	-0.0126437	Intron (ENSMUST00000038551.7/73825, intron 9 of 21)	17	88530118	88588367	58250	1	73825	26491	ENSMUSG00000034709	Ppp1r21	protein phosphatase 1, regulatory subunit 21
chr19_4877614_4878114	chr19	4877614	4878114	501	*	-1.90689	0.000386187	-0.0126437	Promoter (<=1kb)	19	4861216	4877909	16694	2	11474	0	ENSMUSG00000006457	Actn3	actinin alpha 3
chr19_23804309_23804809	chr19	23804309	23804809	501	*	-1.90689	0.000386187	-0.0126437	Intron (ENSMUST00000025830.8/319924, intron 1 of 12)	19	23758887	23949596	190710	1	319924	45422	ENSMUSG00000024897	Apba1	amyloid beta (A4) precursor protein binding, family A, member 1
chr19_36887666_36888166	chr19	36887666	36888166	501	*	1.90689	0.000386187	0.0126437	Intron (ENSMUST00000025729.11/74493, intron 24 of 26)	19	36917550	36919615	2066	2	72514	31449	ENSMUSG00000047632	Fgfbp3	fibroblast growth factor binding protein 3
chr19_48473618_48474118	chr19	48473618	48474118	501	*	-1.90689	0.000386187	-0.0126437	Intron (ENSMUST00000078880.5/66673, intron 2 of 26)	19	48206025	48805505	599481	1	66673	267593	ENSMUSG00000063434	Sorcs3	sortilin-related VPS10 domain containing receptor 3
chr19_60788476_60788976	chr19	60788476	60788976	501	*	-1.90689	0.000386187	-0.0126437	Promoter (1-2kb)	19	60761117	60790658	29542	2	13669	1682	ENSMUSG00000024991	Eif3a	eukaryotic translation initiation factor 3, subunit A
chr2_25261292_25261792	chr2	25261292	25261792	501	*	-1.90689	0.000386187	-0.0126437	Promoter (<=1kb)	2	25262618	25269885	7268	1	97031	-826	ENSMUSG00000048707	Tprn	taperin
chr2_31289463_31289963	chr2	31289463	31289963	501	*	-1.90689	0.000386187	-0.0126437	Intron (ENSMUST00000000199.7/14299, intron 7 of 7)	2	31314415	31460738	146324	1	665700	-24452	ENSMUSG00000055632	Hmcn2	hemicentin 2
chr2_153401688_153402188	chr2	153401688	153402188	501	*	-1.90689	0.000386187	-0.0126437	3' UTR	2	153341157	153346073	4917	2	72326	-55615	ENSMUSG00000073236	2500004C02Rik	RIKEN cDNA 2500004C02 gene
chr2_157012502_157013002	chr2	157012502	157013002	501	*	-1.90689	0.000386187	-0.0126437	Downstream (2-3kb)	2	156995265	157007154	11890	2	66934	-5348	ENSMUSG00000027635	Dsn1	DSN1 homolog, MIS12 kinetochore complex component
chr3_144684821_144685321	chr3	144684821	144685321	501	*	-1.90689	0.000386187	-0.0126437	3' UTR	3	144683678	144720335	36658	2	54673	35014	ENSMUSG00000037062	Sh3glb1	SH3-domain GRB2-like B1 (endophilin)
chr4_133062280_133062780	chr4	133062280	133062780	501	*	-1.90689	0.000386187	-0.0126437	Exon (ENSMUST00000105915.7/230793, exon 6 of 7)	4	133011260	133078110	66851	1	230793	51020	ENSMUSG00000037692	Ahdc1	AT hook, DNA binding motif, containing 1
chr4_139227002_139227502	chr4	139227002	139227502	501	*	-1.90689	0.000386187	-0.0126437	5' UTR	4	139192899	139291818	98920	1	12345	34103	ENSMUSG00000028745	Capzb	capping protein (actin filament) muscle Z-line, beta
chr5_19228707_19229207	chr5	19228707	19229207	501	*	1.90689	0.000386187	0.0126437	Promoter (1-2kb)	5	19227036	20704792	1477757	1	50791	1671	ENSMUSG00000040003	Magi2	membrane associated guanylate kinase, WW and PDZ domain containing 2
chr5_83931197_83931697	chr5	83931197	83931697	501	*	1.90689	0.000386187	0.0126437	Distal Intergenic	5	84054761	84417382	362622	2	13839	485685	ENSMUSG00000029245	Epha5	Eph receptor A5
chr5_107916863_107917363	chr5	107916863	107917363	501	*	1.90689	0.000386187	0.0126437	Intron (ENSMUST00000031198.10/67266, intron 2 of 4)	5	107900502	107909005	8504	1	100503670	16361	ENSMUSG00000058558	Rpl5	ribosomal protein L5
chr5_117358677_117359177	chr5	117358677	117359177	501	*	-1.90689	0.000386187	-0.0126437	Promoter (1-2kb)	5	117357304	117378601	21298	1	59043	1373	ENSMUSG00000029364	Wsb2	WD repeat and SOCS box-containing 2
chr5_123148344_123148844	chr5	123148344	123148844	501	*	-1.90689	0.000386187	-0.0126437	Exon (ENSMUST00000100731.8/208043, exon 6 of 6)	5	123142193	123168629	26437	1	208043	6151	ENSMUSG00000038384	Setd1b	SET domain containing 1B
chr5_125034571_125035071	chr5	125034571	125035071	501	*	-1.90689	0.000386187	-0.0126437	Intron (ENSMUST00000125053.7/20602, intron 8 of 26)	5	125003221	125012547	9327	1	73121	31350	ENSMUSG00000037962	Rflna	refilin A
chr6_97918387_97918887	chr6	97918387	97918887	501	*	-1.90689	0.000386187	-0.0126437	Intron (ENSMUST00000203884.2/17342, intron 1 of 9)	6	97807052	98021349	214298	1	17342	111335	ENSMUSG00000035158	Mitf	melanogenesis associated transcription factor
chr6_126667462_126667962	chr6	126667462	126667962	501	*	-1.90689	0.000386187	-0.0126437	Distal Intergenic	6	126640397	126646384	5988	2	16485	-21078	ENSMUSG00000047976	Kcna1	potassium voltage-gated channel, shaker-related subfamily, member 1
chr6_135150282_135150782	chr6	135150282	135150782	501	*	-1.90689	0.000386187	-0.0126437	Intron (ENSMUST00000045855.8/15199, intron 3 of 3)	6	135105991	135118283	12293	2	93746	-31999	ENSMUSG00000030205	Gprc5d	G protein-coupled receptor, family C, group 5, member D
chr7_19390158_19390658	chr7	19390158	19390658	501	*	1.90689	0.000386187	0.0126437	Exon (ENSMUST00000062831.15/13871, exon 13 of 23)	7	19386643	19386717	75	1	100124438	3515	ENSMUSG00000076315	Mir343	microRNA 343
chr7_25132275_25132775	chr7	25132275	25132775	501	*	-1.90689	0.000386187	-0.0126437	5' UTR	7	25152457	25156627	4171	1	434147	-19682	ENSMUSG00000074274	D930028M14Rik	RIKEN cDNA D930028M14 gene
chr7_44551290_44551790	chr7	44551290	44551790	501	*	-1.90689	0.000386187	-0.0126437	Promoter (2-3kb)	7	44549616	44553951	4336	2	22260	2161	ENSMUSG00000060601	Nr1h2	nuclear receptor subfamily 1, group H, member 2
chr7_63893172_63893672	chr7	63893172	63893672	501	*	-1.90689	0.000386187	-0.0126437	Intron (ENSMUST00000063694.9/50794, intron 1 of 1)	7	63916857	63920539	3683	1	381994	-23185	ENSMUSG00000095061	E030018B13Rik	RIKEN cDNA E030018B13 gene
chr7_79310077_79310577	chr7	79310077	79310577	501	*	-1.90689	0.000386187	-0.0126437	Intron (ENSMUST00000037315.12/54608, intron 3 of 10)	7	79273199	79365508	92310	1	54608	36878	ENSMUSG00000039202	Abhd2	abhydrolase domain containing 2
chr7_89335121_89335621	chr7	89335121	89335621	501	*	-1.90689	0.000386187	-0.0126437	Intron (ENSMUST00000041968.10/72759, intron 1 of 14)	7	89139714	89404222	264509	2	72759	68601	ENSMUSG00000039428	Tmem135	transmembrane protein 135
chr7_100965017_100965517	chr7	100965017	100965517	501	*	-1.90689	0.000386187	-0.0126437	Intron (ENSMUST00000209196.1/233571, intron 1 of 1)	7	100937630	100974649	37020	2	233571	9132	ENSMUSG00000048779	P2ry6	pyrimidinergic receptor P2Y, G-protein coupled, 6
chr7_126757775_126758275	chr7	126757775	126758275	501	*	-1.90689	0.000386187	-0.0126437	Promoter (1-2kb)	7	126759601	126765819	6219	1	26417	-1326	ENSMUSG00000063065	Mapk3	mitogen-activated protein kinase 3
chr7_126962367_126962867	chr7	126962367	126962867	501	*	-1.90689	0.000386187	-0.0126437	Exon (ENSMUST00000106335.7/233878, exon 10 of 17)	7	126945567	126949582	4016	2	233879	-12785	ENSMUSG00000046378	Asphd1	aspartate beta-hydroxylase domain containing 1
chr7_127581823_127582323	chr7	127581823	127582323	501	*	1.90689	0.000386187	0.0126437	3' UTR	7	127582383	127588595	6213	2	233899	6272	ENSMUSG00000057176	Ccdc189	coiled-coil domain containing 189
chr9_46161146_46161646	chr9	46161146	46161646	501	*	1.90689	0.000386187	0.0126437	Intron (ENSMUST00000126865.7/70661, intron 4 of 24)	9	46228580	46230466	1887	1	11806	-66934	ENSMUSG00000032083	Apoa1	apolipoprotein A-I
chr9_64100385_64100885	chr9	64100385	64100885	501	*	-1.90689	0.000386187	-0.0126437	Distal Intergenic	9	64117147	64138118	20972	1	235435	-16262	ENSMUSG00000032401	Lctl	lactase-like
chr10_105114544_105115044	chr10	105114544	105115044	501	*	1.47393	0.000387676	0.0183908	Distal Intergenic	10	105573953	105583874	9922	1	327812	-458909	ENSMUSG00000085282	Gm15663	predicted gene 15663
chr11_97631870_97632370	chr11	97631870	97632370	501	*	-1.47393	0.000387676	-0.0183908	Promoter (2-3kb)	11	97627389	97629702	2314	2	103551	-2168	ENSMUSG00000043439	Epop	elongin BC and polycomb repressive complex 2 associated protein
chr11_121808192_121808692	chr11	121808192	121808692	501	*	-1.47393	0.000387676	-0.0183908	Intron (ENSMUST00000153767.1/ENSMUST00000153767.1, intron 2 of 2)	11	121830247	121843423	13177	1	74675	-21555	ENSMUSG00000039198	Ptchd3	patched domain containing 3
chr14_64812781_64813281	chr14	64812781	64813281	501	*	-1.47393	0.000387676	-0.0183908	3' UTR	14	64811600	64949871	138272	2	219150	136590	ENSMUSG00000021972	Hmbox1	homeobox containing 1
chr15_75828114_75828614	chr15	75828114	75828614	501	*	-1.47393	0.000387676	-0.0183908	Exon (ENSMUST00000229970.1/223642, exon 1 of 7)	15	75754430	75841915	87486	2	223642	13301	ENSMUSG00000075600	Zc3h3	zinc finger CCCH type containing 3
chr18_46334590_46335090	chr18	46334590	46335090	501	*	-1.47393	0.000387676	-0.0183908	Distal Intergenic	18	46282151	46311928	29778	2	240261	-22662	ENSMUSG00000071855	Ccdc112	coiled-coil domain containing 112
chr19_36677877_36678377	chr19	36677877	36678377	501	*	-1.47393	0.000387676	-0.0183908	Intron (ENSMUST00000149601.7/668215, intron 1 of 4)	19	36614052	36705641	91590	2	668215	27264	ENSMUSG00000087579	Hectd2os	Hectd2, opposite strand
chr19_48090378_48090878	chr19	48090378	48090878	501	*	-1.47393	0.000387676	-0.0183908	Distal Intergenic	19	48206025	48805505	599481	1	66673	-115147	ENSMUSG00000063434	Sorcs3	sortilin-related VPS10 domain containing receptor 3
chr2_84660231_84660731	chr2	84660231	84660731	501	*	-1.47393	0.000387676	-0.0183908	Promoter (1-2kb)	2	84659079	84668780	9702	1	100270744	1152	ENSMUSG00000086598	Btbd18	BTB (POZ) domain containing 18
chr4_135067051_135067551	chr4	135067051	135067551	501	*	-1.47393	0.000387676	-0.0183908	Distal Intergenic	4	135120652	135177990	57339	1	12399	-53101	ENSMUSG00000070691	Runx3	runt related transcription factor 3
chr4_147903557_147904057	chr4	147903557	147904057	501	*	-1.47393	0.000387676	-0.0183908	Promoter (<=1kb)	4	147873599	147904704	31106	2	170731	647	ENSMUSG00000029020	Mfn2	mitofusin 2
chr5_4755821_4756321	chr5	4755821	4756321	501	*	-1.47393	0.000387676	-0.0183908	Promoter (1-2kb)	5	4753839	4758035	4197	2	14362	1714	ENSMUSG00000044674	Fzd1	frizzled class receptor 1
chr5_48926440_48926940	chr5	48926440	48926940	501	*	-1.47393	0.000387676	-0.0183908	Exon (ENSMUST00000200465.1/ENSMUST00000200465.1, exon 1 of 1)	5	48395577	48414294	18718	1	70592	530863	ENSMUSG00000029089	5730480H06Rik	RIKEN cDNA 5730480H06 gene
chr6_83164872_83165372	chr6	83164872	83165372	501	*	-1.47393	0.000387676	-0.0183908	Promoter (<=1kb)	6	83165920	83200117	34198	1	13191	-548	ENSMUSG00000031865	Dctn1	dynactin 1
chr7_39655693_39656193	chr7	39655693	39656193	501	*	-1.47393	0.000387676	-0.0183908	Distal Intergenic	7	39517766	39540420	22655	1	70227	137927	ENSMUSG00000068959	Zfp619	zinc finger protein 619
chr7_118502328_118502828	chr7	118502328	118502828	501	*	-1.47393	0.000387676	-0.0183908	Distal Intergenic	7	118485111	118491975	6865	2	319622	-10353	ENSMUSG00000095115	Itpripl2	inositol 1,4,5-triphosphate receptor interacting protein-like 2
chrX_50841067_50841567	chrX	50841067	50841567	501	*	-1.47393	0.000387676	-0.0183908	Promoter (<=1kb)	20	50841047	50893097	52051	1	70415	20	ENSMUSG00000031112	Stk26	serine/threonine kinase 26
chr11_22376546_22377046	chr11	22376546	22377046	501	*	-1.22239	0.000405039	-0.0229885	Distal Intergenic	11	22005828	22342292	336465	2	216565	-34254	ENSMUSG00000042302	Ehbp1	EH domain binding protein 1
chr12_39073658_39074158	chr12	39073658	39074158	501	*	-1.22239	0.000405039	-0.0229885	Intron (ENSMUST00000222945.1/ENSMUST00000222945.1, intron 3 of 3)	12	38779380	38870484	91105	1	14009	294278	ENSMUSG00000004151	Etv1	ets variant 1
chr13_31806276_31806776	chr13	31806276	31806776	501	*	-1.22239	0.000405039	-0.0229885	Promoter (<=1kb)	13	31806633	31812476	5844	1	17300	0	ENSMUSG00000050295	Foxc1	forkhead box C1
chr14_49723649_49724149	chr14	49723649	49724149	501	*	-1.22239	0.000405039	-0.0229885	Intron (ENSMUST00000226994.1/ENSMUST00000226994.1, intron 2 of 3)	14	49675952	49783383	107432	2	67419	59234	ENSMUSG00000036242	Armh4	armadillo-like helical domain containing 4
chr15_63371137_63371637	chr15	63371137	63371637	501	*	-1.22239	0.000405039	-0.0229885	Intron (ENSMUST00000228339.2/432958, intron 4 of 8)	15	63176838	63718289	541452	2	432958	346652	ENSMUSG00000115520	Gm20740	predicted gene, 20740
chr17_63757755_63758255	chr17	63757755	63758255	501	*	-1.22239	0.000405039	-0.0229885	Distal Intergenic	17	63863062	64139496	276435	1	14158	-104807	ENSMUSG00000000127	Fer	fer (fms/fps related) protein kinase
chr2_35649645_35650145	chr2	35649645	35650145	501	*	-1.22239	0.000405039	-0.0229885	Intron (ENSMUST00000112986.8/69601, intron 2 of 16)	2	35549538	35558702	9165	2	100042194	-90943	ENSMUSG00000086555	Gm13446	predicted gene 13446
chr2_93014407_93014907	chr2	93014407	93014907	501	*	-1.22239	0.000405039	-0.0229885	Intron (ENSMUST00000111274.8/100042784, intron 1 of 6)	2	93027956	93044732	16777	1	433456	-13049	ENSMUSG00000075027	4631405J19Rik	RIKEN cDNA 4631405J19 gene
chr2_118743241_118743741	chr2	118743241	118743741	501	*	-1.22239	0.000405039	-0.0229885	Promoter (2-3kb)	2	118745758	118748810	3053	1	100043272	-2017	ENSMUSG00000074918	Inafm2	InaF motif containing 2
chr3_55354693_55355193	chr3	55354693	55355193	501	*	-1.22239	0.000405039	-0.0229885	Intron (ENSMUST00000196745.4/13175, intron 3 of 16)	3	55242364	55539068	296705	1	13175	112329	ENSMUSG00000027797	Dclk1	doublecortin-like kinase 1
chr4_21951436_21951936	chr4	21951436	21951936	501	*	-1.22239	0.000405039	-0.0229885	Intron (ENSMUST00000124440.7/76132, intron 2 of 3)	4	21931329	21996839	65511	1	76132	20107	ENSMUSG00000028246	Faxc	failed axon connections homolog
chr4_134397123_134397623	chr4	134397123	134397623	501	*	-1.22239	0.000405039	-0.0229885	Promoter (<=1kb)	4	134396320	134427413	31094	1	100163	803	ENSMUSG00000037366	Pafah2	platelet-activating factor acetylhydrolase 2
chr5_30825722_30826222	chr5	30825722	30826222	501	*	-1.22239	0.000405039	-0.0229885	Intron (ENSMUST00000031058.14/100732, intron 1 of 6)	5	30814641	30866106	51466	1	100732	11081	ENSMUSG00000029166	Mapre3	microtubule-associated protein, RP/EB family, member 3
chr5_121812143_121812643	chr5	121812143	121812643	501	*	-1.22239	0.000405039	-0.0229885	Intron (ENSMUST00000051950.13/20239, intron 23 of 24)	5	121819209	121819273	65	2	102465624	6630	ENSMUSG00000099063	Mir7031	microRNA 7031
chr6_32058307_32058807	chr6	32058307	32058807	501	*	-1.22239	0.000405039	-0.0229885	3' UTR	6	32050246	32058921	8676	1	76382	8061	ENSMUSG00000029766	1700012A03Rik	RIKEN cDNA 1700012A03 gene
chr7_100846853_100847353	chr7	100846853	100847353	501	*	1.22239	0.000405039	0.0229885	3' UTR	7	100845847	100863446	17600	2	320100	16093	ENSMUSG00000008318	Relt	RELT tumor necrosis factor receptor
chr7_139441743_139442243	chr7	139441743	139442243	501	*	-1.22239	0.000405039	-0.0229885	Intron (ENSMUST00000106098.7/212111, intron 1 of 15)	7	139389109	139579652	190544	1	212111	52634	ENSMUSG00000025477	Inpp5a	inositol polyphosphate-5-phosphatase A
chr8_88621372_88621872	chr8	88621372	88621872	501	*	-1.22239	0.000405039	-0.0229885	Distal Intergenic	8	88626563	88636128	9566	2	71607	14256	ENSMUSG00000031662	Snx20	sorting nexin 20
chr9_14698928_14699428	chr9	14698928	14699428	501	*	-1.22239	0.000405039	-0.0229885	Intron (ENSMUST00000136399.7/330890, intron 4 of 4)	9	14663022	14665099	2078	1	665374	35906	ENSMUSG00000111085	Gm7607	predicted gene 7607
chr9_21798287_21798787	chr9	21798287	21798787	501	*	-1.22239	0.000405039	-0.0229885	Promoter (<=1kb)	9	21766784	21798744	31961	2	235041	0	ENSMUSG00000032194	Kank2	KN motif and ankyrin repeat domains 2
chr13_36019827_36020327	chr13	36019827	36020327	501	*	-1	0.000407884	-0.0287356	Intron (ENSMUST00000053265.7/380840, intron 2 of 2)	13	35958839	35970388	11550	1	76487	60988	ENSMUSG00000050423	Ppp1r3g	protein phosphatase 1, regulatory subunit 3G
chr13_51171027_51171527	chr13	51171027	51171527	501	*	-1	0.000407884	-0.0287356	Promoter (<=1kb)	13	51171022	51175188	4167	1	75124	5	ENSMUSG00000021396	Nxnl2	nucleoredoxin-like 2
chr17_83705302_83705802	chr17	83705302	83705802	501	*	-1	0.000407884	-0.0287356	Promoter (<=1kb)	17	83706163	83821516	115354	1	116871	-361	ENSMUSG00000055817	Mta3	metastasis associated 3
chr2_165070308_165070808	chr2	165070308	165070808	501	*	-1	0.000407884	-0.0287356	3' UTR	2	165055627	165072948	17322	1	21939	14681	ENSMUSG00000017652	Cd40	CD40 antigen
chr4_140555219_140555719	chr4	140555219	140555719	501	*	-1	0.000407884	-0.0287356	Intron (ENSMUST00000138493.7/72754, intron 7 of 15)	4	140514485	140666012	151528	2	72754	110293	ENSMUSG00000040964	Arhgef10l	Rho guanine nucleotide exchange factor (GEF) 10-like
chr5_36795905_36796405	chr5	36795905	36796405	501	*	-1	0.000407884	-0.0287356	Promoter (<=1kb)	5	36794867	36796772	1906	2	67568	367	ENSMUSG00000055302	Mrfap1	Morf4 family associated protein 1
chr6_90537861_90538361	chr6	90537861	90538361	501	*	-1	0.000407884	-0.0287356	Intron (ENSMUST00000127199.1/107747, intron 1 of 2)	6	90486427	90600203	113777	1	107747	51434	ENSMUSG00000030088	Aldh1l1	aldehyde dehydrogenase 1 family, member L1
chr7_79308411_79308911	chr7	79308411	79308911	501	*	-1	0.000407884	-0.0287356	Intron (ENSMUST00000037315.12/54608, intron 3 of 10)	7	79273199	79365508	92310	1	54608	35212	ENSMUSG00000039202	Abhd2	abhydrolase domain containing 2
chr9_110953895_110954395	chr9	110953895	110954395	501	*	-1	0.000407884	-0.0287356	Promoter (2-3kb)	9	110951545	110984066	32522	1	74249	2350	ENSMUSG00000032495	Lrrc2	leucine rich repeat containing 2
chr9_119029545_119030045	chr9	119029545	119030045	501	*	-1	0.000407884	-0.0287356	Promoter (1-2kb)	9	119031796	119031885	90	1	387218	-1751	ENSMUSG00000065513	Mir26a-1	microRNA 26a-1
chr10_41004279_41004779	chr10	41004279	41004779	501	*	-1.03103	0.000438822	-0.0275862	Distal Intergenic	10	41069977	41072285	2309	2	140741	67506	ENSMUSG00000046922	Gpr6	G protein-coupled receptor 6
chr17_84958376_84958876	chr17	84958376	84958876	501	*	-1.03103	0.000438822	-0.0275862	Promoter (<=1kb)	17	84917182	84957710	40529	2	68531	-666	ENSMUSG00000097047	1110020A21Rik	RIKEN cDNA 1110020A21 gene
chr3_102735228_102735728	chr3	102735228	102735728	501	*	-1.03103	0.000438822	-0.0275862	Promoter (<=1kb)	3	102720231	102735417	15187	2	78491	0	ENSMUSG00000086745	Tspan2os	tetraspanin 2, opposite strand
chr8_84990799_84991299	chr8	84990799	84991299	501	*	-1.03103	0.000438822	-0.0275862	Promoter (<=1kb)	8	84990603	85003349	12747	1	170833	196	ENSMUSG00000052566	Hook2	hook microtubule tethering protein 2
chr8_94186542_94187042	chr8	94186542	94187042	501	*	-1.03103	0.000438822	-0.0275862	Distal Intergenic	8	94179082	94180327	1246	1	17748	7460	ENSMUSG00000031765	Mt1	metallothionein 1
chr1_17154321_17154821	chr1	17154321	17154821	501	*	-1.16046	0.000444339	-0.0241379	Intron (ENSMUST00000026879.7/14545, intron 2 of 5)	1	17145362	17164271	18910	1	14545	8959	ENSMUSG00000025777	Gdap1	ganglioside-induced differentiation-associated-protein 1
chr1_86488101_86488601	chr1	86488101	86488601	501	*	-1.16046	0.000444339	-0.0241379	Distal Intergenic	1	86526726	86530712	3987	1	19231	-38125	ENSMUSG00000026238	Ptma	prothymosin alpha
chr1_162476475_162476975	chr1	162476475	162476975	501	*	-1.16046	0.000444339	-0.0241379	Promoter (1-2kb)	1	161982453	162478034	495582	2	103967	1059	ENSMUSG00000040265	Dnm3	dynamin 3
chr11_11868090_11868590	chr11	11868090	11868590	501	*	-1.16046	0.000444339	-0.0241379	Promoter (<=1kb)	11	11868123	11885321	17199	1	73321	0	ENSMUSG00000086391	1700042O10Rik	RIKEN cDNA 1700042O10 gene
chr11_56406748_56407248	chr11	56406748	56407248	501	*	-1.16046	0.000444339	-0.0241379	Distal Intergenic	11	56024987	56041010	16024	2	216749	-365738	ENSMUSG00000037393	Nmur2	neuromedin U receptor 2
chr11_104331180_104331680	chr11	104331180	104331680	501	*	-1.16046	0.000444339	-0.0241379	3' UTR	11	104231390	104332090	100701	1	17762	99790	ENSMUSG00000018411	Mapt	microtubule-associated protein tau
chr11_120045022_120045522	chr11	120045022	120045522	501	*	-1.16046	0.000444339	-0.0241379	Promoter (1-2kb)	11	120007313	120047167	39855	2	11302	1645	ENSMUSG00000025375	Aatk	apoptosis-associated tyrosine kinase
chr17_75087335_75087835	chr17	75087335	75087835	501	*	-1.16046	0.000444339	-0.0241379	Intron (ENSMUST00000234490.1/268977, intron 3 of 34)	17	75005568	75392512	386945	1	268977	81767	ENSMUSG00000001870	Ltbp1	latent transforming growth factor beta binding protein 1
chr17_83872731_83873231	chr17	83872731	83873231	501	*	-1.16046	0.000444339	-0.0241379	Distal Intergenic	17	83851675	83854418	2744	2	320021	-18313	ENSMUSG00000097254	C430042M11Rik	RIKEN cDNA C430042M11 gene
chr2_31688786_31689286	chr2	31688786	31689286	501	*	-1.16046	0.000444339	-0.0241379	Promoter (<=1kb)	2	31676364	31688469	12106	2	108168742	-317	ENSMUSG00000087549	Gm13427	predicted gene 13427
chr3_109497042_109497542	chr3	109497042	109497542	501	*	-1.16046	0.000444339	-0.0241379	Intron (ENSMUST00000046864.13/57257, intron 4 of 26)	3	109340653	109685698	345046	1	57257	156389	ENSMUSG00000033721	Vav3	vav 3 oncogene
chr3_130242609_130243109	chr3	130242609	130243109	501	*	-1.16046	0.000444339	-0.0241379	Intron (ENSMUST00000143830.2/77018, intron 2 of 19)	3	130131501	130599877	468377	1	77018	111108	ENSMUSG00000058897	Col25a1	collagen, type XXV, alpha 1
chr7_127017831_127018331	chr7	127017831	127018331	501	*	-1.16046	0.000444339	-0.0241379	Promoter (2-3kb)	7	127001480	127021039	19560	2	67278	2708	ENSMUSG00000107068	Pagr1a	PAXIP1 associated glutamate rich protein 1A
chr9_16074633_16075133	chr9	16074633	16075133	501	*	-1.16046	0.000444339	-0.0241379	Intron (ENSMUST00000217308.2/270120, intron 4 of 25)	9	15824528	15874556	50029	2	244701	-200077	ENSMUSG00000050901	Mtnr1b	melatonin receptor 1B
chr9_57261538_57262038	chr9	57261538	57262038	501	*	-1.16046	0.000444339	-0.0241379	Promoter (<=1kb)	9	57253117	57262612	9496	2	74211	574	ENSMUSG00000032300	1700017B05Rik	RIKEN cDNA 1700017B05 gene
chr1_37638511_37639011	chr1	37638511	37639011	501	*	-1.32193	0.000447134	-0.0206897	Intron (ENSMUST00000162875.7/72097, intron 2 of 9)	1	37611677	37720085	108409	2	72097	81074	ENSMUSG00000026090	Cracdl	capping protein inhibiting regulator of actin like
chr1_64737611_64738111	chr1	64737611	64738111	501	*	-1.32193	0.000447134	-0.0206897	Promoter (<=1kb)	1	64730558	64737751	7194	2	14367	0	ENSMUSG00000045005	Fzd5	frizzled class receptor 5
chr14_67620738_67621238	chr14	67620738	67621238	501	*	-1.32193	0.000447134	-0.0206897	Distal Intergenic	14	67676331	67715841	39511	2	108912	94603	ENSMUSG00000048922	Cdca2	cell division cycle associated 2
chr18_22241752_22242252	chr18	22241752	22242252	501	*	-1.32193	0.000447134	-0.0206897	Distal Intergenic	18	21810893	22171442	360550	2	70950	-70310	ENSMUSG00000024306	Ccdc178	coiled coil domain containing 178
chr2_166584469_166584969	chr2	166584469	166584969	501	*	-1.32193	0.000447134	-0.0206897	Intron (ENSMUST00000036719.11/277360, intron 25 of 39)	2	166566342	166713832	147491	2	277360	128863	ENSMUSG00000039621	Prex1	phosphatidylinositol-3,4,5-trisphosphate-dependent Rac exchange factor 1
chr4_45528273_45528773	chr4	45528273	45528773	501	*	-1.32193	0.000447134	-0.0206897	Intron (ENSMUST00000061986.11/230126, intron 1 of 5)	4	45423278	45532470	109193	2	230126	3697	ENSMUSG00000044813	Shb	src homology 2 domain-containing transforming protein B
chr4_103702058_103702558	chr4	103702058	103702558	501	*	-1.32193	0.000447134	-0.0206897	Intron (ENSMUST00000143294.7/13131, intron 1 of 3)	4	103619359	104744844	1125486	1	13131	82699	ENSMUSG00000028519	Dab1	disabled 1
chr4_144890501_144891001	chr4	144890501	144891001	501	*	-1.32193	0.000447134	-0.0206897	Promoter (1-2kb)	4	144892827	144928209	35383	1	20148	-1826	ENSMUSG00000066026	Dhrs3	dehydrogenase/reductase (SDR family) member 3
chr5_124922359_124922859	chr5	124922359	124922859	501	*	-1.32193	0.000447134	-0.0206897	Distal Intergenic	5	124862691	124902693	40003	1	269704	59668	ENSMUSG00000079215	Zfp664	zinc finger protein 664
chr6_31175653_31176153	chr6	31175653	31176153	501	*	-1.32193	0.000447134	-0.0206897	Intron (ENSMUST00000187876.6/232685, intron 1 of 3)	6	31086538	31218474	131937	2	232685	42321	ENSMUSG00000044471	Lncpint	long non-protein coding RNA, Trp53 induced transcript
chr9_103432468_103432968	chr9	103432468	103432968	501	*	-1.32193	0.000447134	-0.0206897	Exon (ENSMUST00000136636.1/107993, exon 3 of 5)	9	103423578	103461260	37683	1	100529079	8890	ENSMUSG00000086236	5830418P13Rik	RIKEN cDNA 5830418P13 gene
chr1_168391517_168392017	chr1	168391517	168392017	501	*	-1.06711	0.000449376	-0.0264368	Intron (ENSMUST00000188912.6/18514, intron 2 of 7)	1	168119364	168432270	312907	2	18514	40253	ENSMUSG00000052534	Pbx1	pre B cell leukemia homeobox 1
chr10_8240173_8240673	chr10	8240173	8240673	501	*	-1.52356	0.000449376	-0.0172414	Intron (ENSMUST00000219116.1/338362, intron 6 of 6)	10	8204756	8518825	314070	2	338362	278152	ENSMUSG00000047712	Ust	uronyl-2-sulfotransferase
chr11_117462381_117462881	chr11	117462381	117462881	501	*	-1.52356	0.000449376	-0.0172414	Distal Intergenic	11	117484368	117489014	4647	1	432615	-21487	ENSMUSG00000069588	Gm11733	predicted gene 11733
chr12_79612653_79613153	chr12	79612653	79613153	501	*	-1.06711	0.000449376	-0.0264368	Intron (ENSMUST00000171210.2/19363, intron 7 of 10)	12	79297282	79814690	517409	1	19363	315371	ENSMUSG00000059060	Rad51b	RAD51 paralog B
chr13_48856830_48857330	chr13	48856830	48857330	501	*	-1.52356	0.000449376	-0.0172414	Intron (ENSMUST00000035540.8/18676, intron 1 of 21)	13	48801750	48871119	69370	2	18676	13789	ENSMUSG00000038025	Phf2	PHD finger protein 2
chr13_56221947_56222447	chr13	56221947	56222447	501	*	-1.52356	0.000449376	-0.0172414	Exon (ENSMUST00000181629.1/75245, exon 5 of 5)	13	56222224	56243940	21717	2	75245	21493	ENSMUSG00000097361	4930550C17Rik	RIKEN cDNA 4930550C17 gene
chr13_63188334_63188834	chr13	63188334	63188834	501	*	-1.52356	0.000449376	-0.0172414	Intron (ENSMUST00000091560.10/72061, intron 6 of 14)	13	63300484	63300557	74	1	387217	-111650	ENSMUSG00000065599	Mir23b	microRNA 23b
chr13_107073082_107073582	chr13	107073082	107073582	501	*	-1.06711	0.000449376	-0.0264368	Intron (ENSMUST00000224811.1/ENSMUST00000224811.1, intron 1 of 1)	13	107022553	107055497	32945	1	100040322	50529	ENSMUSG00000071181	3830408C21Rik	RIKEN cDNA 3830408C21 gene
chr14_12570919_12571419	chr14	12570919	12571419	501	*	-1.06711	0.000449376	-0.0264368	Intron (ENSMUST00000224882.1/27062, intron 6 of 28)	14	12342094	12348189	6096	2	54713	-222730	ENSMUSG00000021743	Fezf2	Fez family zinc finger 2
chr14_32597142_32597642	chr14	32597142	32597642	501	*	-1.06711	0.000449376	-0.0264368	Promoter (1-2kb)	14	32599407	32649246	49840	1	107751	-1765	ENSMUSG00000041730	Prrxl1	paired related homeobox protein-like 1
chr14_33632704_33633204	chr14	33632704	33633204	501	*	-1.06711	0.000449376	-0.0264368	3' UTR	14	33589207	33640754	51548	1	19256	43497	ENSMUSG00000021940	Ptpn20	protein tyrosine phosphatase, non-receptor type 20
chr14_52810566_52811066	chr14	52810566	52811066	501	*	-1.52356	0.000449376	-0.0172414	5' UTR	14	53032417	53039466	7050	2	102632039	228400	ENSMUSG00000104598	Gm30214	predicted gene, 30214
chr14_54594572_54595072	chr14	54594572	54595072	501	*	-1.52356	0.000449376	-0.0172414	Intron (ENSMUST00000022786.5/74359, intron 2 of 6)	14	54583663	54605993	22331	2	74359	10921	ENSMUSG00000022179	4931414P19Rik	RIKEN cDNA 4931414P19 gene
chr15_58986942_58987442	chr15	58986942	58987442	501	*	-1.52356	0.000449376	-0.0172414	Intron (ENSMUST00000226216.1/ENSMUST00000226216.1, intron 1 of 1)	15	58890155	58933738	43584	2	69694	-53204	ENSMUSG00000050891	Tatdn1	TatD DNase domain containing 1
chr15_102672529_102673029	chr15	102672529	102673029	501	*	-1.06711	0.000449376	-0.0264368	Promoter (<=1kb)	15	102662864	102672352	9489	2	67942	-177	ENSMUSG00000062683	Atp5g2	ATP synthase, H+ transporting, mitochondrial F0 complex, subunit C2 (subunit 9)
chr16_57392931_57393431	chr16	57392931	57393431	501	*	-1.52356	0.000449376	-0.0172414	Intron (ENSMUST00000159816.7/78749, intron 1 of 4)	16	57353093	57573126	220034	1	78749	39838	ENSMUSG00000043336	Filip1l	filamin A interacting protein 1-like
chr17_50688116_50688616	chr17	50688116	50688616	501	*	1.52356	0.000449376	0.0172414	3' UTR	17	50509403	50688484	179082	1	224860	178713	ENSMUSG00000038910	Plcl2	phospholipase C-like 2
chr18_37825178_37825678	chr18	37825178	37825678	501	*	-1.06711	0.000449376	-0.0264368	Intron (ENSMUST00000115661.4/100384868, intron 2 of 3)	18	37819513	37841873	22361	1	93708	5665	ENSMUSG00000102543	Pcdhgc5	protocadherin gamma subfamily C, 5
chr18_82867700_82868200	chr18	82867700	82868200	501	*	-1.06711	0.000449376	-0.0264368	Intron (ENSMUST00000181345.1/73985, intron 1 of 1)	18	82855894	82870604	14711	1	73985	11806	ENSMUSG00000097738	4930445N18Rik	RIKEN cDNA 4930445N18 gene
chr2_30699056_30699556	chr2	30699056	30699556	501	*	-1.52356	0.000449376	-0.0172414	Distal Intergenic	2	30658468	30678011	19544	2	665635	-21045	NA	Gm14486	predicted gene 14486
chr2_31769154_31769654	chr2	31769154	31769654	501	*	-1.52356	0.000449376	-0.0172414	Intron (ENSMUST00000075759.12/11350, intron 1 of 10)	2	31806166	31810580	4415	2	227717	40926	ENSMUSG00000043102	Qrfp	pyroglutamylated RFamide peptide
chr2_45044444_45044944	chr2	45044444	45044944	501	*	-1.52356	0.000449376	-0.0172414	Intron (ENSMUST00000176438.8/24136, intron 3 of 10)	2	45023100	45023177	78	2	100628598	-21267	ENSMUSG00000092679	Mir5129	microRNA 5129
chr2_57123921_57124421	chr2	57123921	57124421	501	*	-1.52356	0.000449376	-0.0172414	Promoter (<=1kb)	2	57106830	57124003	17174	2	18227	0	ENSMUSG00000026826	Nr4a2	nuclear receptor subfamily 4, group A, member 2
chr2_76618039_76618539	chr2	76618039	76618539	501	*	-1.52356	0.000449376	-0.0172414	Distal Intergenic	2	76629898	76648015	18118	2	23992	29476	ENSMUSG00000002731	Prkra	protein kinase, interferon inducible double stranded RNA dependent activator
chr2_91645129_91645629	chr2	91645129	91645629	501	*	-1.52356	0.000449376	-0.0172414	Exon (ENSMUST00000099714.9/381410, exon 5 of 5)	2	91643669	91649791	6123	2	381410	4162	ENSMUSG00000075040	Zfp408	zinc finger protein 408
chr2_152933558_152934058	chr2	152933558	152934058	501	*	-1.52356	0.000449376	-0.0172414	Promoter (<=1kb)	2	152931898	152933208	1311	2	14239	-350	ENSMUSG00000074676	Foxs1	forkhead box S1
chr3_117602317_117602817	chr3	117602317	117602817	501	*	-1.52356	0.000449376	-0.0172414	Intron (ENSMUST00000039564.10/75769, intron 1 of 5)	3	117574836	117689507	114672	1	75769	27481	ENSMUSG00000033342	Plppr5	phospholipid phosphatase related 5
chr4_59850140_59850640	chr4	59850140	59850640	501	*	-1.52356	0.000449376	-0.0172414	Intron (ENSMUST00000030080.6/209131, intron 1 of 8)	4	59805840	59904737	98898	1	209131	44300	ENSMUSG00000028385	Snx30	sorting nexin family member 30
chr4_134087426_134087926	chr4	134087426	134087926	501	*	-1.06711	0.000449376	-0.0264368	Exon (ENSMUST00000227683.1/230806, exon 17 of 22)	4	134082448	134095082	12635	2	23833	7156	ENSMUSG00000000682	Cd52	CD52 antigen
chr5_123059758_123060258	chr5	123059758	123060258	501	*	-1.52356	0.000449376	-0.0172414	Distal Intergenic	5	123068415	123117749	49335	1	330189	-8157	ENSMUSG00000054434	Tmem120b	transmembrane protein 120B
chr5_129611040_129611540	chr5	129611040	129611540	501	*	-1.06711	0.000449376	-0.0264368	3' UTR	5	129584169	129611099	26931	1	23948	26871	ENSMUSG00000029436	Mmp17	matrix metallopeptidase 17
chr5_143902124_143902624	chr5	143902124	143902624	501	*	-1.06711	0.000449376	-0.0264368	3' UTR	5	143890741	143897685	6945	2	66729	-4439	ENSMUSG00000029607	Ankrd61	ankyrin repeat domain 61
chr7_3705405_3705905	chr7	3705405	3705905	501	*	-1.52356	0.000449376	-0.0172414	Promoter (1-2kb)	7	3703993	3706897	2905	1	76846	1412	ENSMUSG00000006333	Rps9	ribosomal protein S9
chr7_105729001_105729501	chr7	105729001	105729501	501	*	-1.06711	0.000449376	-0.0264368	Downstream (2-3kb)	7	105736592	105742925	6334	1	16202	-7091	ENSMUSG00000030890	Ilk	integrin linked kinase
chr7_111736310_111736810	chr7	111736310	111736810	501	*	-1.52356	0.000449376	-0.0172414	Intron (ENSMUST00000049430.14/233733, intron 1 of 10)	7	111471661	111779977	308317	2	233733	43167	ENSMUSG00000038296	Galnt18	polypeptide N-acetylgalactosaminyltransferase 18
chr7_119793758_119794258	chr7	119793758	119794258	501	*	-1.06711	0.000449376	-0.0264368	Promoter (<=1kb)	7	119794006	119848943	54938	1	434234	0	ENSMUSG00000030924	Rexo5	RNA exonuclease 5
chr7_127103923_127104423	chr7	127103923	127104423	501	*	-1.52356	0.000449376	-0.0172414	Downstream (2-3kb)	7	127091359	127093986	2628	1	101602	12564	ENSMUSG00000045165	AI467606	expressed sequence AI467606
chr8_3501025_3501525	chr8	3501025	3501525	501	*	-1.52356	0.000449376	-0.0172414	Promoter (<=1kb)	8	3500457	3515232	14776	1	94178	568	ENSMUSG00000004567	Mcoln1	mucolipin 1
chr8_11787304_11787804	chr8	11787304	11787804	501	*	-1.52356	0.000449376	-0.0172414	Intron (ENSMUST00000110909.8/54126, intron 5 of 18)	8	11840474	11855761	15288	1	75528	-52670	ENSMUSG00000031512	Tex29	testis expressed 29
chr8_70592445_70592945	chr8	70592445	70592945	501	*	-1.52356	0.000449376	-0.0172414	Promoter (1-2kb)	8	70594373	70597290	2918	1	71780	-1428	ENSMUSG00000019139	Isyna1	myo-inositol 1-phosphate synthase A1
chr8_83999284_83999784	chr8	83999284	83999784	501	*	-1.52356	0.000449376	-0.0172414	Promoter (1-2kb)	8	83997672	84000409	2738	1	666704	1612	ENSMUSG00000079003	Samd1	sterile alpha motif domain containing 1
chr9_42275308_42275808	chr9	42275308	42275808	501	*	-1.52356	0.000449376	-0.0172414	Exon (ENSMUST00000213341.1/ENSMUST00000213341.1, exon 2 of 3)	9	42251595	42264256	12662	2	235293	-11052	ENSMUSG00000032018	Sc5d	sterol-C5-desaturase
chr12_74009323_74009823	chr12	74009323	74009823	501	*	-1.10962	0.000451093	-0.0252874	Intron (ENSMUST00000221220.1/238266, intron 1 of 6)	12	73997661	74273267	275607	1	238266	11662	ENSMUSG00000044912	Syt16	synaptotagmin XVI
chr2_68364430_68364930	chr2	68364430	68364930	501	*	-1.10962	0.000451093	-0.0252874	Intron (ENSMUST00000102715.3/53416, intron 8 of 17)	2	68210445	68472268	261824	2	53416	107338	ENSMUSG00000027030	Stk39	serine/threonine kinase 39
chr4_138700145_138700645	chr4	138700145	138700645	501	*	-1.10962	0.000451093	-0.0252874	Distal Intergenic	4	138724792	138746132	21341	1	18781	-24147	ENSMUSG00000028750	Pla2g2c	phospholipase A2, group IIC
chr6_38823885_38824385	chr6	38823885	38824385	501	*	-1.10962	0.000451093	-0.0252874	Intron (ENSMUST00000161779.7/15258, intron 1 of 14)	6	38875404	39084585	209182	1	21391	-51019	ENSMUSG00000029925	Tbxas1	thromboxane A synthase 1, platelet
chr6_116668630_116669130	chr6	116668630	116669130	501	*	-1.10962	0.000451093	-0.0252874	Intron (ENSMUST00000035842.6/213391, intron 1 of 10)	6	116633008	116673952	40945	2	213391	4822	ENSMUSG00000042129	Rassf4	Ras association (RalGDS/AF-6) domain family member 4
chr7_143685229_143685729	chr7	143685229	143685729	501	*	-1.10962	0.000451093	-0.0252874	Promoter (<=1kb)	7	143665809	143685872	20064	2	79201	143	ENSMUSG00000037613	Tnfrsf23	tumor necrosis factor receptor superfamily, member 23
chr8_120216686_120217186	chr8	120216686	120217186	501	*	-1.10962	0.000451093	-0.0252874	Intron (ENSMUST00000127664.1/108148, intron 1 of 15)	8	120204434	120228230	23797	2	434353	11044	ENSMUSG00000097960	A330074K22Rik	RIKEN cDNA A330074K22 gene
chrX_160338623_160339123	chrX	160338623	160339123	501	*	-1.10962	0.000451093	-0.0252874	Distal Intergenic	20	160390690	160498070	107381	1	237175	-51567	ENSMUSG00000031298	Adgrg2	adhesion G protein-coupled receptor G2
chr1_33645728_33646228	chr1	33645728	33646228	501	*	-1.76553	0.000492984	-0.0137931	Intron (ENSMUST00000027312.10/19076, intron 5 of 13)	1	33453810	33669795	215986	2	19076	23567	ENSMUSG00000026134	Prim2	DNA primase, p58 subunit
chr1_73274398_73274898	chr1	73274398	73274898	501	*	-1.76553	0.000492984	-0.0137931	Intron (ENSMUST00000190578.1/ENSMUST00000190578.1, intron 2 of 2)	1	73398968	73430790	31823	1	78718	-124070	ENSMUSG00000101812	D530049I02Rik	RIKEN cDNA D530049I02 gene
chr1_74368116_74368616	chr1	74368116	74368616	501	*	-1.76553	0.000492984	-0.0137931	Exon (ENSMUST00000097697.7/241112, exon 9 of 10)	1	74362108	74369321	7214	1	241112	6008	ENSMUSG00000073650	Catip	ciliogenesis associated TTC17 interacting protein
chr1_182520101_182520601	chr1	182520101	182520601	501	*	-1.76553	0.000492984	-0.0137931	Promoter (2-3kb)	1	182467260	182517608	50349	2	12334	-2493	ENSMUSG00000026509	Capn2	calpain 2
chr10_83591301_83591801	chr10	83591301	83591801	501	*	-1.76553	0.000492984	-0.0137931	3' UTR	10	83543752	83596473	52722	1	319277	47549	ENSMUSG00000034560	Washc4	WASH complex subunit 4
chr11_32733653_32734153	chr11	32733653	32734153	501	*	-1.76553	0.000492984	-0.0137931	Intron (ENSMUST00000109366.7/103583, intron 7 of 12)	11	32818529	32824605	6077	2	69351	90452	ENSMUSG00000020270	Smim23	small integral membrane protein 23
chr11_120274719_120275219	chr11	120274719	120275219	501	*	-1.76553	0.000492984	-0.0137931	Exon (ENSMUST00000122148.7/268515, exon 10 of 28)	11	120232947	120292296	59350	1	268515	41772	ENSMUSG00000039741	Bahcc1	BAH domain and coiled-coil containing 1
chr12_53300914_53301414	chr12	53300914	53301414	501	*	-1.76553	0.000492984	-0.0137931	Intron (ENSMUST00000223358.1/27386, intron 1 of 10)	12	53248677	54072175	823499	1	27386	52237	ENSMUSG00000021010	Npas3	neuronal PAS domain protein 3
chr13_20228259_20228759	chr13	20228259	20228759	501	*	-1.76553	0.000492984	-0.0137931	Intron (ENSMUST00000181429.7/140580, intron 4 of 6)	13	20090596	20608353	517758	1	140580	137663	ENSMUSG00000041112	Elmo1	engulfment and cell motility 1
chr13_93468149_93468649	chr13	93468149	93468649	501	*	1.76553	0.000492984	0.0137931	Intron (ENSMUST00000065537.8/57748, intron 2 of 10)	13	93430101	93499808	69708	2	57748	31159	ENSMUSG00000021690	Jmy	junction-mediating and regulatory protein
chr14_100235824_100236324	chr14	100235824	100236324	501	*	-1.76553	0.000492984	-0.0137931	Intron (ENSMUST00000140320.8/ENSMUST00000140320.8, intron 3 of 4)	14	99870632	100284679	414048	2	16597	48355	ENSMUSG00000072294	Klf12	Kruppel-like factor 12
chr14_120319729_120320229	chr14	120319729	120320229	501	*	-1.76553	0.000492984	-0.0137931	Intron (ENSMUST00000088419.12/105559, intron 1 of 8)	14	120275669	120431697	156029	1	105559	44060	ENSMUSG00000022139	Mbnl2	muscleblind like splicing factor 2
chr15_87567017_87567517	chr15	87567017	87567517	501	*	-1.76553	0.000492984	-0.0137931	Intron (ENSMUST00000230414.1/106014, intron 1 of 3)	15	87544299	87759364	215066	1	106014	22718	ENSMUSG00000054863	Tafa5	TAFA chemokine like family member 5
chr16_18415835_18416335	chr16	18415835	18416335	501	*	-1.76553	0.000492984	-0.0137931	Intron (ENSMUST00000115609.9/12846, intron 1 of 4)	16	18426384	18479073	52690	1	26462	-10049	ENSMUSG00000075704	Txnrd2	thioredoxin reductase 2
chr17_6168759_6169259	chr17	6168759	6169259	501	*	-1.76553	0.000492984	-0.0137931	Intron (ENSMUST00000142030.7/68842, intron 1 of 5)	17	6106479	6251128	144650	1	68842	62280	ENSMUSG00000034377	Tulp4	tubby like protein 4
chr17_8935536_8936036	chr17	8935536	8936036	501	*	-1.76553	0.000492984	-0.0137931	Intron (ENSMUST00000115715.7/23984, intron 5 of 21)	17	8988333	9011949	23617	1	66931	-52297	ENSMUSG00000023873	1700010I14Rik	RIKEN cDNA 1700010I14 gene
chr17_28260144_28260644	chr17	28260144	28260644	501	*	-1.76553	0.000492984	-0.0137931	Intron (ENSMUST00000002320.15/19015, intron 2 of 7)	17	28271708	28273163	1456	1	69050	-11064	ENSMUSG00000002250	1810013A23Rik	RIKEN cDNA 1810013A23 gene
chr17_30314931_30315431	chr17	30314931	30315431	501	*	-1.76553	0.000492984	-0.0137931	Intron (ENSMUST00000168787.7/224671, intron 7 of 10)	17	30395620	30396033	414	2	623169	80602	NA	Gm6402	ribosomal protein S17 pseudogene
chr17_34597604_34598104	chr17	34597604	34598104	501	*	-1.76553	0.000492984	-0.0137931	Promoter (<=1kb)	17	34597862	34600936	3075	1	11596	0	ENSMUSG00000015452	Ager	advanced glycosylation end product-specific receptor
chr19_4307470_4307970	chr19	4307470	4307970	501	*	-1.76553	0.000492984	-0.0137931	Promoter (1-2kb)	19	4286001	4306222	20222	2	110355	-1248	ENSMUSG00000024858	Grk2	G protein-coupled receptor kinase 2
chr19_10941527_10942027	chr19	10941527	10942027	501	*	-1.76553	0.000492984	-0.0137931	3' UTR	19	10937160	10942511	5352	1	14764	4367	ENSMUSG00000034117	Ptgdr2	prostaglandin D2 receptor 2
chr2_119816989_119817489	chr2	119816989	119817489	501	*	-1.76553	0.000492984	-0.0137931	3' UTR	2	119797733	119818104	20372	1	22174	19256	ENSMUSG00000027298	Tyro3	TYRO3 protein tyrosine kinase 3
chr3_36871093_36871593	chr3	36871093	36871593	501	*	-1.76553	0.000492984	-0.0137931	Intron (ENSMUST00000198742.4/229227, intron 3 of 8)	3	36863104	37053033	189930	1	229227	7989	ENSMUSG00000037270	4932438A13Rik	RIKEN cDNA 4932438A13 gene
chr3_85917515_85918015	chr3	85917515	85918015	501	*	1.76553	0.000492984	0.0137931	Distal Intergenic	3	85801047	85887518	86472	2	320302	-29997	ENSMUSG00000031286	Glt28d2	glycosyltransferase 28 domain containing 2
chr4_3810180_3810680	chr4	3810180	3810680	501	*	-1.76553	0.000492984	-0.0137931	Intron (ENSMUST00000137943.1/17096, intron 4 of 4)	4	3831334	3835665	4332	2	67427	24985	ENSMUSG00000028234	Rps20	ribosomal protein S20
chr4_10896800_10897300	chr4	10896800	10897300	501	*	-1.76553	0.000492984	-0.0137931	Intron (ENSMUST00000080517.13/67157, intron 5 of 5)	4	10874498	10899425	24928	1	67157	22302	ENSMUSG00000059482	2610301B20Rik	RIKEN cDNA 2610301B20 gene
chr4_43397922_43398422	chr4	43397922	43398422	501	*	-1.76553	0.000492984	-0.0137931	Intron (ENSMUST00000035645.11/100213, intron 1 of 11)	4	43381979	43427088	45110	1	100213	15943	ENSMUSG00000035969	Rusc2	RUN and SH3 domain containing 2
chr4_46596251_46596751	chr4	46596251	46596751	501	*	1.76553	0.000492984	0.0137931	Intron (ENSMUST00000107756.3/107684, intron 1 of 11)	4	46536937	46602202	65266	2	107684	5451	ENSMUSG00000028337	Coro2a	coronin, actin binding protein 2A
chr4_128041097_128041597	chr4	128041097	128041597	501	*	-1.76553	0.000492984	-0.0137931	Intron (ENSMUST00000129619.7/329942, intron 1 of 12)	4	127987857	128567656	579800	1	329942	53240	ENSMUSG00000028804	Csmd2	CUB and Sushi multiple domains 2
chr4_142172892_142173392	chr4	142172892	142173392	501	*	-1.76553	0.000492984	-0.0137931	Intron (ENSMUST00000155023.7/71529, intron 1 of 13)	4	142102390	142239401	137012	2	71529	66009	ENSMUSG00000040606	Kazn	kazrin, periplakin interacting protein
chr5_35061904_35062404	chr5	35061904	35062404	501	*	-1.76553	0.000492984	-0.0137931	Intron (ENSMUST00000101298.8/231134, intron 2 of 4)	5	35056766	35087839	31074	1	231134	5138	ENSMUSG00000044716	Dok7	docking protein 7
chr5_96964598_96965098	chr5	96964598	96965098	501	*	-1.76553	0.000492984	-0.0137931	Distal Intergenic	5	96997689	97091867	94179	1	140780	-32591	ENSMUSG00000034663	Bmp2k	BMP2 inducible kinase
chr5_107921346_107921846	chr5	107921346	107921846	501	*	-1.76553	0.000492984	-0.0137931	Intron (ENSMUST00000031198.10/67266, intron 2 of 4)	5	107900502	107909005	8504	1	100503670	20844	ENSMUSG00000058558	Rpl5	ribosomal protein L5
chr5_114615437_114615937	chr5	114615437	114615937	501	*	-1.76553	0.000492984	-0.0137931	Distal Intergenic	5	114622152	114658421	36270	2	63873	42484	ENSMUSG00000014158	Trpv4	transient receptor potential cation channel, subfamily V, member 4
chr5_124128693_124129193	chr5	124128693	124129193	501	*	1.76553	0.000492984	0.0137931	Exon (ENSMUST00000086123.10/19679, exon 13 of 24)	5	124116089	124118196	2108	1	65105	12604	ENSMUSG00000029404	Arl6ip4	ADP-ribosylation factor-like 6 interacting protein 4
chr5_138775102_138775602	chr5	138775102	138775602	501	*	1.76553	0.000492984	0.0137931	Intron (ENSMUST00000026972.7/80752, intron 3 of 9)	5	138754514	138810077	55564	1	80752	20588	ENSMUSG00000025854	Fam20c	family with sequence similarity 20, member C
chr5_149496108_149496608	chr5	149496108	149496608	501	*	-1.76553	0.000492984	-0.0137931	Intron (ENSMUST00000202188.1/100415916, intron 2 of 4)	5	149528679	149611894	83216	1	381693	-32071	ENSMUSG00000029658	Wdr95	WD40 repeat domain 95
chr6_83495903_83496403	chr6	83495903	83496403	501	*	-1.76553	0.000492984	-0.0137931	Intron (ENSMUST00000014698.9/27369, intron 2 of 6)	6	83480217	83506969	26753	2	27369	10566	ENSMUSG00000014554	Dguok	deoxyguanosine kinase
chr6_90922176_90922676	chr6	90922176	90922676	501	*	-1.76553	0.000492984	-0.0137931	Intron (ENSMUST00000212100.1/232227, intron 1 of 15)	6	90656088	90988685	332598	2	232227	66009	ENSMUSG00000034312	Iqsec1	IQ motif and Sec7 domain 1
chr6_113309808_113310308	chr6	113309808	113310308	501	*	-1.76553	0.000492984	-0.0137931	Promoter (2-3kb)	6	113307137	113324860	17724	1	78783	2671	ENSMUSG00000001632	Brpf1	bromodomain and PHD finger containing, 1
chr9_61572862_61573362	chr9	61572862	61573362	501	*	-1.76553	0.000492984	-0.0137931	Distal Intergenic	9	61372366	61418497	46132	1	21887	200496	ENSMUSG00000032280	Tle3	transducin-like enhancer of split 3
chr9_72260288_72260788	chr9	72260288	72260788	501	*	-1.76553	0.000492984	-0.0137931	Distal Intergenic	9	72274860	72363777	88918	1	235469	-14072	ENSMUSG00000038535	Zfp280d	zinc finger protein 280D
chr1_52748195_52748695	chr1	52748195	52748695	501	*	-1.58496	0.000502121	-0.016092	Distal Intergenic	1	52656286	52727462	71177	2	98682	-20733	ENSMUSG00000041439	Mfsd6	major facilitator superfamily domain containing 6
chr10_80651020_80651520	chr10	80651020	80651520	501	*	-1.58496	0.000502121	-0.016092	Intron (ENSMUST00000126980.7/208198, intron 1 of 8)	10	80642617	80657071	14455	2	208198	5551	ENSMUSG00000003344	Btbd2	BTB (POZ) domain containing 2
chr12_85611818_85612318	chr12	85611818	85612318	501	*	1.58496	0.000502121	0.016092	Intron (ENSMUST00000177587.8/81703, intron 2 of 3)	12	85599027	85639878	40852	1	81703	12791	ENSMUSG00000034271	Jdp2	Jun dimerization protein 2
chr14_55097999_55098499	chr14	55097999	55098499	501	*	1.58496	0.000502121	0.016092	3' UTR	14	55060262	55092324	32063	2	239102	-5675	ENSMUSG00000040721	Zfhx2	zinc finger homeobox 2
chr14_100171871_100172371	chr14	100171871	100172371	501	*	-1.58496	0.000502121	-0.016092	Intron (ENSMUST00000228216.1/16597, intron 1 of 7)	14	99870632	100284679	414048	2	16597	112308	ENSMUSG00000072294	Klf12	Kruppel-like factor 12
chr15_58988510_58989010	chr15	58988510	58989010	501	*	-1.58496	0.000502121	-0.016092	Exon (ENSMUST00000226216.1/ENSMUST00000226216.1, exon 2 of 2)	15	58890155	58933738	43584	2	69694	-54772	ENSMUSG00000050891	Tatdn1	TatD DNase domain containing 1
chr15_79096211_79096711	chr15	79096211	79096711	501	*	-1.58496	0.000502121	-0.016092	Distal Intergenic	15	79108898	79136900	28003	1	27008	-12187	ENSMUSG00000033039	Micall1	microtubule associated monooxygenase, calponin and LIM domain containing -like 1
chr15_87960641_87961141	chr15	87960641	87961141	501	*	1.58496	0.000502121	0.016092	Distal Intergenic	15	87795850	87795943	94	2	102465209	-164698	ENSMUSG00000098938	Mir6393	microRNA 6393
chr18_37435745_37436245	chr18	37435745	37436245	501	*	-1.58496	0.000502121	-0.016092	Promoter (<=1kb)	18	37435621	37438654	3034	1	93883	124	ENSMUSG00000043458	Pcdhb12	protocadherin beta 12
chr19_29031829_29032329	chr19	29031829	29032329	501	*	-1.58496	0.000502121	-0.016092	Intron (ENSMUST00000025696.4/56248, intron 2 of 4)	19	29046245	29048729	2485	1	67329	-13916	NA	1700018L02Rik	RIKEN cDNA 1700018L02 gene
chr2_21941128_21941628	chr2	21941128	21941628	501	*	-1.58496	0.000502121	-0.016092	Distal Intergenic	2	22227503	22618252	390750	1	667663	-285875	ENSMUSG00000025716	Myo3a	myosin IIIA
chr2_136779785_136780285	chr2	136779785	136780285	501	*	-1.58496	0.000502121	-0.016092	Intron (ENSMUST00000028727.10/20614, intron 7 of 7)	2	136713453	136782428	68976	1	20614	66332	ENSMUSG00000027273	Snap25	synaptosomal-associated protein 25
chr2_153446772_153447272	chr2	153446772	153447272	501	*	-1.58496	0.000502121	-0.016092	Intron (ENSMUST00000035346.13/329540, intron 4 of 10)	2	153407462	153529971	122510	2	329540	82699	ENSMUSG00000061411	Nol4l	nucleolar protein 4-like
[truncated: 7,306 more rows]
