# Supplementary material for: Functional identification of protocadherin alpha 9 (PCDHA9) as a candidate causative gene for amyotrophic lateral sclerosis
Source: Research Square preprint supplement (doi:10.21203/rs.3.rs-2952148/v1), 2023-06-22
Supplement: Supplementary file 26 [file table S13.xls]

## Sheet: Malat1-regulated miRNAs
axon-localized miRNAs	Malat1 related miRNAs
hsa-miR-15a-3p	hsa-miR-140-5p
hsa-miR-18a-5p	hsa-miR-556-5p
hsa-miR-29b-2-5p	hsa-miR-6509-5p
hsa-miR-196a-5p	hsa-miR-330-5p
hsa-miR-183-3p	hsa-miR-326
hsa-miR-30e-5p	hsa-miR-5691
hsa-miR-375-3p	hsa-miR-6805-3p
hsa-miR-193b-5p	hsa-miR-329-3p
hsa-miR-193b-3p	hsa-miR-362-3p
hsa-miR-708-5p	hsa-miR-769-5p
hsa-miR-18a-3p	hsa-miR-1252-5p
hsa-miR-29b-1-5p	hsa-miR-6875-5p
hsa-miR-301a-5p	hsa-miR-3126-5p
hsa-miR-301a-3p	hsa-miR-526b-5p
hsa-miR-375-3p	hsa-miR-6835-3p
hsa-miR-154-3p	hsa-miR-875-5p
hsa-miR-200c-5p	hsa-miR-494-3p
hsa-miR-200a-5p	hsa-miR-21-5p
hsa-miR-708-3p	hsa-miR-590-5p
hsa-miR-15a-5p	hsa-miR-4739
hsa-miR-21-5p	hsa-miR-3612
hsa-miR-183-5p	hsa-miR-650
hsa-miR-486-5p	hsa-miR-4756-5p
hsa-miR-29b-3p	hsa-miR-1321
hsa-miR-148a-3p	hsa-miR-3064-5p
hsa-miR-29c-3p	hsa-miR-6504-5p
hsa-miR-338-3p	hsa-miR-1913
hsa-miR-21-3p	hsa-miR-324-3p
hsa-miR-148a-5p	hsa-miR-670-3p
hsa-miR-193a-3p	hsa-miR-216b-5p
hsa-miR-363-3p	hsa-miR-3942-5p
hsa-miR-376a-5p	hsa-miR-4703-5p
hsa-miR-30e-3p	hsa-miR-670-3p
hsa-miR-29c-5p	hsa-miR-760
hsa-miR-142-5p	hsa-miR-205-5p
hsa-miR-542-3p	hsa-miR-224-5p
hsa-miR-200a-3p	hsa-miR-944
hsa-miR-200c-3p	hsa-miR-216b-5p
hsa-miR-494-3p	hsa-miR-876-5p
hsa-miR-598-3p	hsa-miR-3167
hsa-miR-340-5p	hsa-miR-150-5p
	hsa-miR-515-5p
	hsa-miR-519e-5p
	hsa-miR-145-5p
	hsa-miR-5195-3p
	hsa-miR-942-5p
	hsa-miR-576-5p
	hsa-miR-384
	hsa-miR-493-5p
	hsa-miR-323b-3p
	hsa-miR-515-5p
	hsa-miR-519e-5p
	hsa-miR-670-3p
	hsa-miR-409-5p
	hsa-miR-514b-5p
	hsa-miR-513c-5p
	hsa-miR-30c-5p
	hsa-miR-30a-5p
	hsa-miR-30d-5p
	hsa-miR-30b-5p
	hsa-miR-30e-5p
	hsa-miR-26a-5p
	hsa-miR-26b-5p
	hsa-miR-4465
	hsa-miR-1297
	hsa-miR-552-5p
	hsa-miR-3142
	hsa-miR-1245b-5p
	hsa-miR-3142
	hsa-miR-1245b-5p
	hsa-miR-23c
	hsa-miR-130a-5p
	hsa-miR-23a-3p
	hsa-miR-23b-3p
	hsa-miR-888-5p
	hsa-miR-3146
	hsa-miR-155-5p
	hsa-miR-384
	hsa-miR-200a-3p
	hsa-miR-141-3p
	hsa-miR-197-3p
	hsa-miR-378c
	hsa-miR-378a-3p
	hsa-miR-422a
	hsa-miR-3690
	hsa-miR-378i
	hsa-miR-378d
	hsa-miR-378f
	hsa-miR-378h
	hsa-miR-378b
	hsa-miR-378e
	hsa-miR-149-5p
	hsa-miR-384
	hsa-miR-197-3p
	hsa-miR-384
	hsa-miR-92a-3p
	hsa-miR-363-3p
	hsa-miR-367-3p
	hsa-miR-92b-3p
	hsa-miR-25-3p
	hsa-miR-32-5p
	hsa-miR-205-5p
	hsa-miR-6746-3p
	hsa-miR-3605-3p
	hsa-miR-96-5p
	hsa-miR-1271-5p
	hsa-miR-212-5p
	hsa-miR-2681-5p
	hsa-miR-409-5p
	hsa-miR-204-5p
	hsa-miR-188-5p
	hsa-miR-6866-3p
	hsa-miR-211-5p
	hsa-miR-346
	hsa-miR-670-3p
	hsa-miR-664b-3p
	hsa-miR-579-3p
	hsa-miR-1323
	hsa-miR-548o-3p
	hsa-miR-506-5p
	hsa-miR-200c-3p
	hsa-miR-200b-3p
	hsa-miR-429
	hsa-miR-651-5p
	hsa-miR-579-3p
	hsa-miR-664b-3p
	hsa-miR-146b-5p
	hsa-miR-7153-5p
	hsa-miR-146a-5p
	hsa-miR-515-5p
	hsa-miR-519e-5p
	hsa-miR-625-5p
	hsa-miR-4465
	hsa-miR-26a-5p
	hsa-miR-26b-5p
	hsa-miR-1297
	hsa-miR-625-3p
	hsa-miR-942-5p
	hsa-miR-483-3p
	hsa-miR-345-3p
	hsa-miR-670-5p
	hsa-miR-2114-5p
	hsa-miR-320a
	hsa-miR-320b
	hsa-miR-320c
	hsa-miR-4429
	hsa-miR-320d
	hsa-miR-143-3p
	hsa-miR-6088
	hsa-miR-4770
	hsa-miR-23c
	hsa-miR-23b-3p
	hsa-miR-130a-5p
	hsa-miR-23a-3p
	hsa-miR-224-5p
	hsa-miR-194-5p
	hsa-miR-499a-5p
	hsa-miR-499a-5p
	hsa-miR-3145-3p
	hsa-miR-625-5p
	hsa-miR-361-3p
	hsa-miR-425-5p
	hsa-miR-144-3p
	hsa-miR-1252-5p
	hsa-miR-361-3p
	hsa-miR-589-5p
	hsa-miR-944
	hsa-miR-126-5p
	hsa-miR-3194-3p
	hsa-miR-5691
	hsa-miR-6805-3p
	hsa-miR-188-5p
	hsa-miR-6866-3p
	hsa-miR-2115-3p
	hsa-miR-374c-5p
	hsa-miR-655-3p
	hsa-miR-369-3p
	hsa-miR-3121-3p
	hsa-miR-498
	hsa-miR-181a-5p
	hsa-miR-181b-5p
	hsa-miR-181c-5p
	hsa-miR-181d-5p
	hsa-miR-4262
	hsa-miR-154-3p
	hsa-miR-487a-3p
	hsa-miR-708-5p
	hsa-miR-3139
	hsa-miR-28-5p
	hsa-miR-216a-5p
	hsa-miR-199a-3p
	hsa-miR-199b-3p
	hsa-miR-3129-5p
	hsa-miR-579-3p
	hsa-miR-664b-3p
	hsa-miR-224-3p
	hsa-miR-3140-3p
	hsa-miR-142-3p
	hsa-miR-96-5p
	hsa-miR-1271-5p
	hsa-miR-494-3p
	hsa-miR-370-3p
	hsa-miR-6893-3p
	hsa-miR-22-3p
	hsa-miR-200c-3p
	hsa-miR-200b-3p
	hsa-miR-429
	hsa-miR-3145-3p
	hsa-miR-93-5p
	hsa-miR-17-5p
	hsa-miR-20a-5p
	hsa-miR-106a-5p
	hsa-miR-20b-5p
	hsa-miR-526b-3p
	hsa-miR-519d-3p
	hsa-miR-106b-5p
	hsa-miR-3179
	hsa-miR-873-5p
	hsa-miR-105-5p
	hsa-miR-7853-5p
	hsa-miR-944
	hsa-miR-506-3p
	hsa-miR-124-3p
	hsa-miR-376b-3p
	hsa-miR-376a-3p
	hsa-miR-802
	hsa-miR-374b-3p
	hsa-miR-4428
	hsa-miR-141-3p
	hsa-miR-200a-3p
	hsa-miR-141-3p
	hsa-miR-200a-3p
	hsa-miR-4766-5p
	hsa-miR-3163
	hsa-miR-126-5p
	hsa-miR-944
	hsa-miR-455-5p
	hsa-miR-154-5p
	hsa-miR-532-3p
	hsa-miR-511-3p
	hsa-miR-3163
	hsa-miR-508-3p
	hsa-miR-4640-3p
	hsa-miR-135a-5p
	hsa-miR-135b-5p
	hsa-miR-1252-5p
	hsa-miR-485-3p
	hsa-miR-539-3p
	hsa-miR-2116-3p
	hsa-miR-4640-3p
	hsa-miR-3611
	hsa-miR-6807-3p
	hsa-miR-217
	hsa-miR-217
	hsa-miR-6807-3p
	hsa-miR-1278
	hsa-miR-101-3p
	hsa-miR-2115-3p
	hsa-miR-383-5p
	hsa-miR-503-5p
	hsa-miR-4524a-5p
	hsa-miR-4524b-5p
	hsa-miR-576-5p
	hsa-miR-154-3p
	hsa-miR-487a-3p
	hsa-miR-1287-5p
	hsa-miR-670-3p
	hsa-miR-670-3p
	hsa-miR-545-3p
	hsa-miR-2681-5p
	hsa-miR-532-3p
	hsa-miR-1-3p
	hsa-miR-206
	hsa-miR-613
	hsa-miR-892c-3p
	hsa-miR-452-5p
	hsa-miR-4676-3p
	hsa-miR-4644
	hsa-miR-185-5p
	hsa-miR-4306
	hsa-miR-4739
	hsa-miR-4756-5p
	hsa-miR-1321
	hsa-miR-328-3p
	hsa-miR-328-3p
	hsa-miR-942-5p
	hsa-miR-1-3p
	hsa-miR-206
	hsa-miR-613
	hsa-miR-140-5p
	hsa-miR-4766-5p
	hsa-miR-6509-3p
	hsa-miR-670-3p
	hsa-miR-320a
	hsa-miR-320b
	hsa-miR-9-3p
	hsa-miR-320c
	hsa-miR-4429
	hsa-miR-320d
	hsa-miR-338-3p
	hsa-miR-6738-5p
	hsa-miR-5194
	hsa-miR-1914-3p
	hsa-miR-2355-3p
	hsa-miR-676-3p
	hsa-miR-651-5p
	hsa-miR-942-5p
	hsa-miR-485-5p
	hsa-miR-6884-5p
	hsa-miR-1179
	hsa-miR-498
	hsa-miR-126-5p
	hsa-miR-498
	hsa-miR-140-5p
	hsa-miR-3200-3p
	hsa-miR-769-5p
	hsa-miR-3150a-3p
	hsa-miR-491-5p
	hsa-miR-6763-5p
	hsa-miR-3622a-5p
	hsa-miR-506-3p
	hsa-miR-124-3p
	hsa-miR-1914-3p
	hsa-miR-6738-5p
	hsa-miR-5194
	hsa-miR-3064-5p
	hsa-miR-6504-5p
	hsa-miR-374c-3p
	hsa-miR-374a-5p
	hsa-miR-374b-5p
	hsa-miR-582-5p
	hsa-miR-338-3p
	hsa-miR-105-5p
	hsa-miR-7853-5p
	hsa-miR-888-5p
	hsa-miR-129-5p
	hsa-miR-374b-3p
	hsa-miR-3146
	hsa-miR-1270
	hsa-miR-620
	hsa-miR-205-5p
	hsa-miR-338-3p
	hsa-miR-665
	hsa-miR-1247-5p
	hsa-miR-330-3p
	hsa-miR-4428
	hsa-miR-1323
	hsa-miR-548o-3p
	hsa-miR-1306-5p
	hsa-miR-532-3p
	hsa-miR-3171
	hsa-miR-561-5p
	hsa-miR-449c-5p
	hsa-miR-34b-5p
	hsa-miR-2682-5p
	hsa-miR-556-3p
	hsa-miR-136-5p

## Sheet: mRNA regulated by miRNAs
miRNA	Genesymbol
hsa-let-7a-5p	FGF1
hsa-let-7b-5p	FGF1
hsa-let-7c-5p	FGF1
hsa-let-7d-5p	FGF1
hsa-let-7d-3p	FGF1
hsa-let-7e-5p	FGF1
hsa-let-7f-5p	FGF1
hsa-let-7f-5p	FGF1
hsa-miR-15a-3p	FGF1
hsa-miR-15a-3p	FGF1
hsa-miR-15a-3p	FGF1
hsa-miR-16-1-3p	FGF1
hsa-miR-17-5p	FGF1
hsa-miR-17-3p	FGF1
hsa-miR-18a-5p	FGF1
hsa-miR-18a-5p	FGF1
hsa-miR-20a-5p	FGF1
hsa-miR-20a-3p	FGF1
hsa-miR-22-3p	FGF1
hsa-miR-23a-3p	FGF1
hsa-miR-24-1-5p	FGF1
hsa-miR-24-3p	FGF1
hsa-miR-24-2-5p	FGF1
hsa-miR-25-5p	FGF1
hsa-miR-25-5p	FGF1
hsa-miR-25-3p	FGF1
hsa-miR-26a-5p	FGF1
hsa-miR-26b-3p	FGF1
hsa-miR-27a-5p	FGF1
hsa-miR-27a-5p	FGF1
hsa-miR-27a-5p	FGF1
hsa-miR-28-5p	FGF1
hsa-miR-30a-3p	FGF1
hsa-miR-31-5p	FGF1
hsa-miR-31-5p	FGF1
hsa-miR-31-5p	FGF1
hsa-miR-31-3p	FGF1
hsa-miR-33a-5p	FGF1
hsa-miR-33a-3p	FGF1
hsa-miR-92a-2-5p	FGF1
hsa-miR-92a-2-5p	FGF1
hsa-miR-92a-2-5p	FGF1
hsa-miR-93-5p	FGF1
hsa-miR-93-5p	FGF1
hsa-miR-93-3p	FGF1
hsa-miR-96-5p	FGF1
hsa-miR-99a-5p	FGF1
hsa-miR-99a-3p	FGF1
hsa-miR-100-5p	FGF1
hsa-miR-29b-2-5p	FGF1
hsa-miR-103a-2-5p	FGF1
hsa-miR-103a-3p	FGF1
hsa-miR-106a-5p	FGF1
hsa-miR-106a-5p	FGF1
hsa-miR-196a-5p	FGF1
hsa-miR-196a-5p	FGF1
hsa-miR-197-3p	FGF1
hsa-miR-197-3p	FGF1
hsa-miR-199a-5p	FGF1
hsa-miR-199a-3p	FGF1
hsa-miR-199a-3p	FGF1
hsa-miR-129-5p	FGF1
hsa-miR-30c-5p	FGF1
hsa-miR-30c-5p	FGF1
hsa-miR-139-5p	FGF1
hsa-miR-139-5p	FGF1
hsa-miR-34a-5p	FGF1
hsa-miR-182-5p	FGF1
hsa-miR-183-3p	FGF1
hsa-miR-187-5p	FGF1
hsa-miR-187-3p	FGF1
hsa-miR-199b-5p	FGF1
hsa-miR-199b-3p	FGF1
hsa-miR-199b-3p	FGF1
hsa-miR-205-5p	FGF1
hsa-miR-205-5p	FGF1
hsa-miR-205-5p	FGF1
hsa-miR-210-3p	FGF1
hsa-miR-212-3p	FGF1
hsa-miR-212-3p	FGF1
hsa-miR-181a-3p	FGF1
hsa-miR-218-2-3p	FGF1
hsa-miR-219a-1-3p	FGF1
hsa-miR-221-5p	FGF1
hsa-miR-221-3p	FGF1
hsa-miR-221-3p	FGF1
hsa-miR-221-3p	FGF1
hsa-miR-222-5p	FGF1
hsa-miR-222-5p	FGF1
hsa-miR-222-3p	FGF1
hsa-miR-224-3p	FGF1
hsa-miR-200b-5p	FGF1
hsa-let-7g-5p	FGF1
hsa-let-7g-5p	FGF1
hsa-let-7g-3p	FGF1
hsa-let-7i-5p	FGF1
hsa-let-7i-3p	FGF1
hsa-let-7i-3p	FGF1
hsa-miR-1-3p	FGF1
hsa-miR-15b-5p	FGF1
hsa-miR-27b-5p	FGF1
hsa-miR-30b-5p	FGF1
hsa-miR-122-5p	FGF1
hsa-miR-124-3p	FGF1
hsa-miR-125b-1-3p	FGF1
hsa-miR-125b-1-3p	FGF1
hsa-miR-130a-3p	FGF1
hsa-miR-137-3p	FGF1
hsa-miR-138-5p	FGF1
hsa-miR-140-5p	FGF1
hsa-miR-141-5p	FGF1
hsa-miR-143-3p	FGF1
hsa-miR-145-3p	FGF1
hsa-miR-145-3p	FGF1
hsa-miR-9-5p	FGF1
hsa-miR-125a-5p	FGF1
hsa-miR-125a-3p	FGF1
hsa-miR-125a-3p	FGF1
hsa-miR-127-3p	FGF1
hsa-miR-129-2-3p	FGF1
hsa-miR-150-5p	FGF1
hsa-miR-185-3p	FGF1
hsa-miR-186-5p	FGF1
hsa-miR-186-3p	FGF1
hsa-miR-188-3p	FGF1
hsa-miR-188-3p	FGF1
hsa-miR-195-5p	FGF1
hsa-miR-320a-3p	FGF1
hsa-miR-155-5p	FGF1
hsa-miR-194-3p	FGF1
hsa-miR-302a-3p	FGF1
hsa-miR-34b-3p	FGF1
hsa-miR-34c-5p	FGF1
hsa-miR-301a-5p	FGF1
hsa-miR-99b-5p	FGF1
hsa-miR-99b-5p	FGF1
hsa-miR-99b-3p	FGF1
hsa-miR-296-3p	FGF1
hsa-miR-296-3p	FGF1
hsa-miR-30e-5p	FGF1
hsa-miR-361-5p	FGF1
hsa-miR-365b-5p	FGF1
hsa-miR-375-3p	FGF1
hsa-miR-377-5p	FGF1
hsa-miR-377-5p	FGF1
hsa-miR-378a-5p	FGF1
hsa-miR-378a-3p	FGF1
hsa-miR-330-5p	FGF1
hsa-miR-330-5p	FGF1
hsa-miR-330-3p	FGF1
hsa-miR-330-3p	FGF1
hsa-miR-323a-3p	FGF1
hsa-miR-148b-5p	FGF1
hsa-miR-148b-3p	FGF1
hsa-miR-324-3p	FGF1
hsa-miR-339-5p	FGF1
hsa-miR-339-3p	FGF1
hsa-miR-339-3p	FGF1
hsa-miR-339-3p	FGF1
hsa-miR-345-5p	FGF1
hsa-miR-196b-5p	FGF1
hsa-miR-196b-5p	FGF1
hsa-miR-423-5p	FGF1
hsa-miR-423-5p	FGF1
hsa-miR-423-5p	FGF1
hsa-miR-424-5p	FGF1
hsa-miR-425-3p	FGF1
hsa-miR-18b-5p	FGF1
hsa-miR-20b-5p	FGF1
hsa-miR-20b-3p	FGF1
hsa-miR-452-5p	FGF1
hsa-miR-452-3p	FGF1
hsa-miR-483-5p	FGF1
hsa-miR-488-5p	FGF1
hsa-miR-488-5p	FGF1
hsa-miR-488-5p	FGF1
hsa-miR-490-5p	FGF1
hsa-miR-490-5p	FGF1
hsa-miR-491-5p	FGF1
hsa-miR-491-5p	FGF1
hsa-miR-511-5p	FGF1
hsa-miR-511-5p	FGF1
hsa-miR-511-5p	FGF1
hsa-miR-146b-3p	FGF1
hsa-miR-146b-3p	FGF1
hsa-miR-193b-5p	FGF1
hsa-miR-193b-3p	FGF1
hsa-miR-193b-3p	FGF1
hsa-miR-193b-3p	FGF1
hsa-miR-512-3p	FGF1
hsa-miR-512-3p	FGF1
hsa-miR-520a-3p	FGF1
hsa-miR-526b-5p	FGF1
hsa-miR-518f-3p	FGF1
hsa-miR-520c-3p	FGF1
hsa-miR-518a-5p	FGF1
hsa-miR-500a-5p	FGF1
hsa-miR-500a-5p	FGF1
hsa-miR-500a-3p	FGF1
hsa-miR-500a-3p	FGF1
hsa-miR-501-5p	FGF1
hsa-miR-501-5p	FGF1
hsa-miR-501-3p	FGF1
hsa-miR-501-3p	FGF1
hsa-miR-502-5p	FGF1
hsa-miR-502-5p	FGF1
hsa-miR-502-3p	FGF1
hsa-miR-502-3p	FGF1
hsa-miR-502-3p	FGF1
hsa-miR-503-5p	FGF1
hsa-miR-504-5p	FGF1
hsa-miR-504-5p	FGF1
hsa-miR-532-5p	FGF1
hsa-miR-92b-3p	FGF1
hsa-miR-561-5p	FGF1
hsa-miR-551b-3p	FGF1
hsa-miR-551b-3p	FGF1
hsa-miR-584-5p	FGF1
hsa-miR-589-5p	FGF1
hsa-miR-550a-5p	FGF1
hsa-miR-550a-3p	FGF1
hsa-miR-550a-3p	FGF1
hsa-miR-605-5p	FGF1
hsa-miR-605-5p	FGF1
hsa-miR-615-5p	FGF1
hsa-miR-615-5p	FGF1
hsa-miR-615-3p	FGF1
hsa-miR-616-5p	FGF1
hsa-miR-616-3p	FGF1
hsa-miR-625-3p	FGF1
hsa-miR-629-5p	FGF1
hsa-miR-629-5p	FGF1
hsa-miR-629-3p	FGF1
hsa-miR-33b-5p	FGF1
hsa-miR-33b-3p	FGF1
hsa-miR-33b-3p	FGF1
hsa-miR-449b-5p	FGF1
hsa-miR-660-5p	FGF1
hsa-miR-671-5p	FGF1
hsa-miR-671-3p	FGF1
hsa-miR-671-3p	FGF1
hsa-miR-550a-3-5p	FGF1
hsa-miR-550a-3-5p	FGF1
hsa-miR-1296-5p	FGF1
hsa-miR-1296-5p	FGF1
hsa-miR-1296-5p	FGF1
hsa-miR-1271-5p	FGF1
hsa-miR-1271-5p	FGF1
hsa-miR-1271-3p	FGF1
hsa-miR-1271-3p	FGF1
hsa-miR-1271-3p	FGF1
hsa-miR-1301-3p	FGF1
hsa-miR-1301-3p	FGF1
hsa-miR-766-5p	FGF1
hsa-miR-766-5p	FGF1
hsa-miR-766-3p	FGF1
hsa-miR-675-3p	FGF1
hsa-miR-541-3p	FGF1
hsa-miR-541-3p	FGF1
hsa-miR-541-3p	FGF1
hsa-miR-876-5p	FGF1
hsa-miR-708-5p	FGF1
hsa-miR-708-5p	FGF1
hsa-miR-744-5p	FGF1
hsa-miR-744-3p	FGF1
hsa-miR-877-5p	FGF1
hsa-miR-877-5p	FGF1
hsa-miR-873-5p	FGF1
hsa-miR-873-5p	FGF1
hsa-miR-873-3p	FGF1
hsa-miR-873-3p	FGF1
hsa-miR-760	FGF1
hsa-miR-941	FGF1
hsa-miR-942-5p	FGF1
hsa-miR-942-5p	FGF1
hsa-miR-1180-3p	FGF1
hsa-miR-548e-3p	FGF1
hsa-miR-1287-5p	FGF1
hsa-miR-1304-3p	FGF1
hsa-miR-548o-3p	FGF1
hsa-miR-1276	FGF1
hsa-miR-664a-3p	FGF1
hsa-miR-664a-3p	FGF1
hsa-miR-1306-5p	FGF1
hsa-miR-513c-5p	FGF1
hsa-miR-1910-5p	FGF1
hsa-miR-2114-5p	FGF1
hsa-miR-3157-3p	FGF1
hsa-miR-3157-3p	FGF1
hsa-miR-3158-3p	FGF1
hsa-miR-3158-3p	FGF1
hsa-miR-3194-5p	FGF1
hsa-miR-3620-3p	FGF1
hsa-miR-3677-5p	FGF1
hsa-miR-3928-3p	FGF1
hsa-miR-3928-3p	FGF1
hsa-miR-4661-5p	FGF1
hsa-miR-4786-5p	FGF1
hsa-miR-4786-3p	FGF1
hsa-miR-5010-3p	FGF1
hsa-miR-5682	FGF1
hsa-miR-5682	FGF1
hsa-let-7a-5p	FGF1
hsa-let-7b-5p	FGF1
hsa-let-7c-5p	FGF1
hsa-let-7d-5p	FGF1
hsa-let-7d-3p	FGF1
hsa-let-7e-5p	FGF1
hsa-let-7e-5p	FGF1
hsa-let-7f-5p	FGF1
hsa-miR-15a-3p	FGF1
hsa-miR-15a-3p	FGF1
hsa-miR-16-1-3p	FGF1
hsa-miR-16-1-3p	FGF1
hsa-miR-17-3p	FGF1
hsa-miR-18a-5p	FGF1
hsa-miR-18a-5p	FGF1
hsa-miR-18a-5p	FGF1
hsa-miR-18a-3p	FGF1
hsa-miR-19b-1-5p	FGF1
hsa-miR-20a-5p	FGF1
hsa-miR-20a-3p	FGF1
hsa-miR-21-5p	FGF1
hsa-miR-23a-3p	FGF1
hsa-miR-24-1-5p	FGF1
hsa-miR-24-3p	FGF1
hsa-miR-25-5p	FGF1
hsa-miR-25-3p	FGF1
hsa-miR-26a-5p	FGF1
hsa-miR-26b-3p	FGF1
hsa-miR-26b-3p	FGF1
hsa-miR-27a-5p	FGF1
hsa-miR-27a-5p	FGF1
hsa-miR-27a-3p	FGF1
hsa-miR-28-5p	FGF1
hsa-miR-28-3p	FGF1
hsa-miR-30a-3p	FGF1
hsa-miR-31-5p	FGF1
hsa-miR-31-5p	FGF1
hsa-miR-31-5p	FGF1
hsa-miR-31-3p	FGF1
hsa-miR-32-5p	FGF1
hsa-miR-33a-5p	FGF1
hsa-miR-33a-3p	FGF1
hsa-miR-92a-2-5p	FGF1
hsa-miR-92a-2-5p	FGF1
hsa-miR-92a-2-5p	FGF1
hsa-miR-93-5p	FGF1
hsa-miR-93-5p	FGF1
hsa-miR-93-3p	FGF1
hsa-miR-96-5p	FGF1
hsa-miR-99a-5p	FGF1
hsa-miR-99a-3p	FGF1
hsa-miR-100-5p	FGF1
hsa-miR-100-5p	FGF1
hsa-miR-29b-1-5p	FGF1
hsa-miR-103a-2-5p	FGF1
hsa-miR-106a-5p	FGF1
hsa-miR-107	FGF1
hsa-miR-192-5p	FGF1
hsa-miR-196a-5p	FGF1
hsa-miR-197-3p	FGF1
hsa-miR-197-3p	FGF1
hsa-miR-199a-5p	FGF1
hsa-miR-199a-3p	FGF1
hsa-miR-129-5p	FGF1
hsa-miR-30c-5p	FGF1
hsa-miR-30c-2-3p	FGF1
hsa-miR-30c-2-3p	FGF1
hsa-miR-30d-3p	FGF1
hsa-miR-139-5p	FGF1
hsa-miR-139-5p	FGF1
hsa-miR-34a-5p	FGF1
hsa-miR-34a-5p	FGF1
hsa-miR-182-5p	FGF1
hsa-miR-187-3p	FGF1
hsa-miR-199b-5p	FGF1
hsa-miR-199b-5p	FGF1
hsa-miR-199b-3p	FGF1
hsa-miR-204-5p	FGF1
hsa-miR-205-5p	FGF1
hsa-miR-205-5p	FGF1
hsa-miR-205-5p	FGF1
hsa-miR-210-3p	FGF1
hsa-miR-212-3p	FGF1
hsa-miR-212-3p	FGF1
hsa-miR-181a-3p	FGF1
hsa-miR-219a-1-3p	FGF1
hsa-miR-221-5p	FGF1
hsa-miR-221-3p	FGF1
hsa-miR-221-3p	FGF1
hsa-miR-221-3p	FGF1
hsa-miR-222-5p	FGF1
hsa-miR-222-5p	FGF1
hsa-miR-200b-5p	FGF1
hsa-miR-200b-3p	FGF1
hsa-let-7g-5p	FGF1
hsa-let-7g-3p	FGF1
hsa-let-7i-5p	FGF1
hsa-miR-30b-5p	FGF1
hsa-miR-122-5p	FGF1
hsa-miR-122-5p	FGF1
hsa-miR-124-3p	FGF1
hsa-miR-124-3p	FGF1
hsa-miR-125b-5p	FGF1
hsa-miR-125b-1-3p	FGF1
hsa-miR-125b-1-3p	FGF1
hsa-miR-125b-1-3p	FGF1
hsa-miR-128-3p	FGF1
hsa-miR-128-3p	FGF1
hsa-miR-133a-3p	FGF1
hsa-miR-138-5p	FGF1
hsa-miR-138-2-3p	FGF1
hsa-miR-141-5p	FGF1
hsa-miR-145-3p	FGF1
hsa-miR-145-3p	FGF1
hsa-miR-191-5p	FGF1
hsa-miR-9-5p	FGF1
hsa-miR-125a-5p	FGF1
hsa-miR-125a-3p	FGF1
hsa-miR-125a-3p	FGF1
hsa-miR-127-3p	FGF1
hsa-miR-129-2-3p	FGF1
hsa-miR-129-2-3p	FGF1
hsa-miR-150-5p	FGF1
hsa-miR-185-5p	FGF1
hsa-miR-185-3p	FGF1
hsa-miR-186-5p	FGF1
hsa-miR-186-3p	FGF1
hsa-miR-188-5p	FGF1
hsa-miR-188-3p	FGF1
hsa-miR-188-3p	FGF1
hsa-miR-320a-3p	FGF1
hsa-miR-155-5p	FGF1
hsa-miR-155-5p	FGF1
hsa-miR-194-3p	FGF1
hsa-miR-302a-3p	FGF1
hsa-miR-34b-3p	FGF1
hsa-miR-34c-5p	FGF1
hsa-miR-301a-5p	FGF1
hsa-miR-301a-3p	FGF1
hsa-miR-99b-5p	FGF1
hsa-miR-99b-5p	FGF1
hsa-miR-296-3p	FGF1
hsa-miR-361-5p	FGF1
hsa-miR-361-3p	FGF1
hsa-miR-365b-5p	FGF1
hsa-miR-365b-5p	FGF1
hsa-miR-375-3p	FGF1
hsa-miR-377-5p	FGF1
hsa-miR-377-5p	FGF1
hsa-miR-377-5p	FGF1
hsa-miR-377-3p	FGF1
hsa-miR-378a-5p	FGF1
hsa-miR-378a-3p	FGF1
hsa-miR-380-5p	FGF1
hsa-miR-330-3p	FGF1
hsa-miR-330-3p	FGF1
hsa-miR-330-3p	FGF1
hsa-miR-342-5p	FGF1
hsa-miR-342-3p	FGF1
hsa-miR-323a-3p	FGF1
hsa-miR-135b-3p	FGF1
hsa-miR-148b-5p	FGF1
hsa-miR-148b-3p	FGF1
hsa-miR-324-3p	FGF1
hsa-miR-339-5p	FGF1
hsa-miR-339-3p	FGF1
hsa-miR-339-3p	FGF1
hsa-miR-339-3p	FGF1
hsa-miR-345-5p	FGF1
hsa-miR-196b-5p	FGF1
hsa-miR-196b-5p	FGF1
hsa-miR-196b-5p	FGF1
hsa-miR-196b-5p	FGF1
hsa-miR-423-5p	FGF1
hsa-miR-423-5p	FGF1
hsa-miR-423-5p	FGF1
hsa-miR-424-5p	FGF1
hsa-miR-425-3p	FGF1
hsa-miR-18b-5p	FGF1
hsa-miR-20b-5p	FGF1
hsa-miR-20b-3p	FGF1
hsa-miR-452-5p	FGF1
hsa-miR-452-3p	FGF1
hsa-miR-483-5p	FGF1
hsa-miR-488-5p	FGF1
hsa-miR-490-5p	FGF1
hsa-miR-491-5p	FGF1
hsa-miR-491-5p	FGF1
hsa-miR-511-5p	FGF1
hsa-miR-511-5p	FGF1
hsa-miR-146b-3p	FGF1
hsa-miR-146b-3p	FGF1
hsa-miR-193b-5p	FGF1
hsa-miR-193b-3p	FGF1
hsa-miR-193b-3p	FGF1
hsa-miR-512-3p	FGF1
hsa-miR-512-3p	FGF1
hsa-miR-520a-3p	FGF1
hsa-miR-520c-3p	FGF1
hsa-miR-500a-5p	FGF1
hsa-miR-500a-3p	FGF1
hsa-miR-500a-3p	FGF1
hsa-miR-501-5p	FGF1
hsa-miR-501-5p	FGF1
hsa-miR-501-3p	FGF1
hsa-miR-502-5p	FGF1
hsa-miR-502-5p	FGF1
hsa-miR-502-5p	FGF1
hsa-miR-502-3p	FGF1
hsa-miR-502-3p	FGF1
hsa-miR-502-3p	FGF1
hsa-miR-503-5p	FGF1
hsa-miR-504-5p	FGF1
hsa-miR-92b-3p	FGF1
hsa-miR-561-5p	FGF1
hsa-miR-551b-3p	FGF1
hsa-miR-574-3p	FGF1
hsa-miR-584-5p	FGF1
hsa-miR-589-5p	FGF1
hsa-miR-589-3p	FGF1
hsa-miR-589-3p	FGF1
hsa-miR-589-3p	FGF1
hsa-miR-550a-3p	FGF1
hsa-miR-550a-3p	FGF1
hsa-miR-597-5p	FGF1
hsa-miR-605-5p	FGF1
hsa-miR-605-5p	FGF1
hsa-miR-615-5p	FGF1
hsa-miR-615-5p	FGF1
hsa-miR-615-3p	FGF1
hsa-miR-616-5p	FGF1
hsa-miR-616-3p	FGF1
hsa-miR-616-3p	FGF1
hsa-miR-625-5p	FGF1
hsa-miR-625-3p	FGF1
hsa-miR-629-5p	FGF1
hsa-miR-629-3p	FGF1
hsa-miR-33b-3p	FGF1
hsa-miR-33b-3p	FGF1
hsa-miR-652-3p	FGF1
hsa-miR-449b-5p	FGF1
hsa-miR-660-5p	FGF1
hsa-miR-671-5p	FGF1
hsa-miR-550a-3-5p	FGF1
hsa-miR-550a-3-5p	FGF1
hsa-miR-1296-5p	FGF1
hsa-miR-1296-5p	FGF1
hsa-miR-1271-5p	FGF1
hsa-miR-1271-3p	FGF1
hsa-miR-1271-3p	FGF1
hsa-miR-1271-3p	FGF1
hsa-miR-1301-3p	FGF1
hsa-miR-1301-3p	FGF1
hsa-miR-449c-5p	FGF1
hsa-miR-766-5p	FGF1
hsa-miR-766-5p	FGF1
hsa-miR-766-3p	FGF1
hsa-miR-675-3p	FGF1
hsa-miR-675-3p	FGF1
hsa-miR-541-3p	FGF1
hsa-miR-541-3p	FGF1
hsa-miR-876-5p	FGF1
hsa-miR-708-5p	FGF1
hsa-miR-708-5p	FGF1
hsa-miR-147b-3p	FGF1
hsa-miR-744-5p	FGF1
hsa-miR-744-3p	FGF1
hsa-miR-877-5p	FGF1
hsa-miR-877-5p	FGF1
hsa-miR-873-5p	FGF1
hsa-miR-873-3p	FGF1
hsa-miR-873-3p	FGF1
hsa-miR-760	FGF1
hsa-miR-941	FGF1
hsa-miR-942-5p	FGF1
hsa-miR-942-5p	FGF1
hsa-miR-1304-3p	FGF1
hsa-miR-1276	FGF1
hsa-miR-1276	FGF1
hsa-miR-664a-3p	FGF1
hsa-miR-1306-5p	FGF1
hsa-miR-1306-3p	FGF1
hsa-miR-513c-5p	FGF1
hsa-miR-1910-5p	FGF1
hsa-miR-1910-5p	FGF1
hsa-miR-1914-3p	FGF1
hsa-miR-1914-3p	FGF1
hsa-miR-2114-5p	FGF1
hsa-miR-3127-3p	FGF1
hsa-miR-3127-3p	FGF1
hsa-miR-3157-3p	FGF1
hsa-miR-3157-3p	FGF1
hsa-miR-3158-3p	FGF1
hsa-miR-3194-5p	FGF1
hsa-miR-3605-3p	FGF1
hsa-miR-3619-3p	FGF1
hsa-miR-3620-3p	FGF1
hsa-miR-3677-5p	FGF1
hsa-miR-3928-3p	FGF1
hsa-miR-3928-3p	FGF1
hsa-miR-4661-5p	FGF1
hsa-miR-4661-5p	FGF1
hsa-miR-2467-5p	FGF1
hsa-miR-4786-5p	FGF1
hsa-miR-4786-3p	FGF1
hsa-miR-5010-3p	FGF1
hsa-miR-5682	FGF1
hsa-miR-5682	FGF1
hsa-let-7a-5p	FGF1
hsa-let-7b-5p	FGF1
hsa-let-7c-5p	FGF1
hsa-let-7d-5p	FGF1
hsa-let-7d-3p	FGF1
hsa-let-7e-5p	FGF1
hsa-let-7e-5p	FGF1
hsa-let-7f-5p	FGF1
hsa-let-7f-5p	FGF1
hsa-miR-15a-3p	FGF1
hsa-miR-15a-3p	FGF1
hsa-miR-15a-3p	FGF1
hsa-miR-16-1-3p	FGF1
hsa-miR-17-5p	FGF1
hsa-miR-17-3p	FGF1
hsa-miR-18a-5p	FGF1
hsa-miR-18a-5p	FGF1
hsa-miR-20a-5p	FGF1
hsa-miR-20a-5p	FGF1
hsa-miR-20a-3p	FGF1
hsa-miR-21-5p	FGF1
hsa-miR-22-3p	FGF1
hsa-miR-23a-3p	FGF1
hsa-miR-24-1-5p	FGF1
hsa-miR-24-3p	FGF1
hsa-miR-24-2-5p	FGF1
hsa-miR-25-5p	FGF1
hsa-miR-25-5p	FGF1
hsa-miR-25-3p	FGF1
hsa-miR-26a-5p	FGF1
hsa-miR-26b-3p	FGF1
hsa-miR-27a-5p	FGF1
hsa-miR-28-5p	FGF1
hsa-miR-28-3p	FGF1
hsa-miR-30a-3p	FGF1
hsa-miR-31-5p	FGF1
hsa-miR-31-5p	FGF1
hsa-miR-31-3p	FGF1
hsa-miR-33a-3p	FGF1
hsa-miR-92a-2-5p	FGF1
hsa-miR-92a-2-5p	FGF1
hsa-miR-92a-2-5p	FGF1
hsa-miR-93-5p	FGF1
hsa-miR-93-5p	FGF1
hsa-miR-93-3p	FGF1
hsa-miR-98-5p	FGF1
hsa-miR-99a-5p	FGF1
hsa-miR-99a-3p	FGF1
hsa-miR-100-5p	FGF1
hsa-miR-29b-1-5p	FGF1
hsa-miR-106a-5p	FGF1
hsa-miR-106a-5p	FGF1
hsa-miR-197-3p	FGF1
hsa-miR-199a-5p	FGF1
hsa-miR-199a-3p	FGF1
hsa-miR-129-5p	FGF1
hsa-miR-30c-5p	FGF1
hsa-miR-30c-5p	FGF1
hsa-miR-30c-2-3p	FGF1
hsa-miR-30c-2-3p	FGF1
hsa-miR-30d-3p	FGF1
hsa-miR-139-5p	FGF1
hsa-miR-139-5p	FGF1
hsa-miR-34a-5p	FGF1
hsa-miR-34a-5p	FGF1
hsa-miR-182-5p	FGF1
hsa-miR-187-5p	FGF1
hsa-miR-187-3p	FGF1
hsa-miR-187-3p	FGF1
hsa-miR-199b-5p	FGF1
hsa-miR-199b-5p	FGF1
hsa-miR-199b-3p	FGF1
hsa-miR-203a-3p	FGF1
hsa-miR-205-5p	FGF1
hsa-miR-205-5p	FGF1
hsa-miR-205-5p	FGF1
hsa-miR-210-3p	FGF1
hsa-miR-212-3p	FGF1
hsa-miR-212-3p	FGF1
hsa-miR-181a-3p	FGF1
hsa-miR-219a-1-3p	FGF1
hsa-miR-221-5p	FGF1
hsa-miR-221-3p	FGF1
hsa-miR-221-3p	FGF1
hsa-miR-221-3p	FGF1
hsa-miR-222-5p	FGF1
hsa-miR-222-5p	FGF1
hsa-miR-224-3p	FGF1
hsa-miR-200b-5p	FGF1
hsa-let-7g-5p	FGF1
hsa-let-7g-3p	FGF1
hsa-let-7i-5p	FGF1
hsa-let-7i-3p	FGF1
hsa-miR-15b-5p	FGF1
hsa-miR-30b-5p	FGF1
hsa-miR-30b-3p	FGF1
hsa-miR-122-5p	FGF1
hsa-miR-122-5p	FGF1
hsa-miR-124-3p	FGF1
hsa-miR-124-3p	FGF1
hsa-miR-125b-5p	FGF1
hsa-miR-125b-1-3p	FGF1
hsa-miR-125b-1-3p	FGF1
hsa-miR-125b-1-3p	FGF1
hsa-miR-125b-1-3p	FGF1
hsa-miR-128-3p	FGF1
hsa-miR-137-3p	FGF1
hsa-miR-138-5p	FGF1
hsa-miR-140-5p	FGF1
hsa-miR-140-3p	FGF1
hsa-miR-141-5p	FGF1
hsa-miR-143-3p	FGF1
hsa-miR-145-3p	FGF1
hsa-miR-145-3p	FGF1
hsa-miR-191-5p	FGF1
hsa-miR-9-5p	FGF1
hsa-miR-125a-5p	FGF1
hsa-miR-125a-3p	FGF1
hsa-miR-125a-3p	FGF1
hsa-miR-127-3p	FGF1
hsa-miR-127-3p	FGF1
hsa-miR-129-2-3p	FGF1
hsa-miR-149-5p	FGF1
hsa-miR-150-5p	FGF1
hsa-miR-154-3p	FGF1
hsa-miR-185-5p	FGF1
hsa-miR-185-3p	FGF1
hsa-miR-186-5p	FGF1
hsa-miR-186-3p	FGF1
hsa-miR-188-3p	FGF1
hsa-miR-188-3p	FGF1
hsa-miR-320a-3p	FGF1
hsa-miR-200c-5p	FGF1
hsa-miR-155-5p	FGF1
hsa-miR-155-5p	FGF1
hsa-miR-194-3p	FGF1
hsa-miR-194-3p	FGF1
hsa-miR-30c-1-3p	FGF1
hsa-miR-30c-1-3p	FGF1
hsa-miR-200a-5p	FGF1
hsa-miR-34b-3p	FGF1
hsa-miR-34c-5p	FGF1
hsa-miR-301a-5p	FGF1
hsa-miR-301a-3p	FGF1
hsa-miR-99b-5p	FGF1
hsa-miR-99b-5p	FGF1
hsa-miR-296-3p	FGF1
hsa-miR-296-3p	FGF1
hsa-miR-130b-3p	FGF1
hsa-miR-361-5p	FGF1
hsa-miR-365a-3p	FGF1
hsa-miR-365b-5p	FGF1
hsa-miR-365b-5p	FGF1
hsa-miR-365b-3p	FGF1
hsa-miR-375-3p	FGF1
hsa-miR-377-5p	FGF1
hsa-miR-377-5p	FGF1
hsa-miR-377-5p	FGF1
hsa-miR-378a-5p	FGF1
hsa-miR-378a-3p	FGF1
hsa-miR-380-5p	FGF1
hsa-miR-382-5p	FGF1
hsa-miR-330-3p	FGF1
hsa-miR-330-3p	FGF1
hsa-miR-330-3p	FGF1
hsa-miR-342-5p	FGF1
hsa-miR-342-3p	FGF1
hsa-miR-323a-3p	FGF1
hsa-miR-135b-3p	FGF1
hsa-miR-148b-5p	FGF1
hsa-miR-148b-3p	FGF1
hsa-miR-324-3p	FGF1
hsa-miR-324-3p	FGF1
hsa-miR-339-5p	FGF1
hsa-miR-339-3p	FGF1
hsa-miR-339-3p	FGF1
hsa-miR-345-5p	FGF1
hsa-miR-196b-5p	FGF1
hsa-miR-196b-5p	FGF1
hsa-miR-196b-5p	FGF1
hsa-miR-423-5p	FGF1
hsa-miR-423-5p	FGF1
hsa-miR-424-5p	FGF1
hsa-miR-424-3p	FGF1
hsa-miR-425-3p	FGF1
hsa-miR-18b-5p	FGF1
hsa-miR-20b-5p	FGF1
hsa-miR-20b-3p	FGF1
hsa-miR-452-3p	FGF1
hsa-miR-483-5p	FGF1
hsa-miR-488-5p	FGF1
hsa-miR-488-5p	FGF1
hsa-miR-488-5p	FGF1
hsa-miR-490-5p	FGF1
hsa-miR-490-5p	FGF1
hsa-miR-491-5p	FGF1
hsa-miR-491-5p	FGF1
hsa-miR-511-5p	FGF1
hsa-miR-146b-3p	FGF1
hsa-miR-146b-3p	FGF1
hsa-miR-146b-3p	FGF1
hsa-miR-193b-3p	FGF1
hsa-miR-512-3p	FGF1
hsa-miR-512-3p	FGF1
hsa-miR-520a-3p	FGF1
hsa-miR-526b-5p	FGF1
hsa-miR-518f-3p	FGF1
hsa-miR-520c-3p	FGF1
hsa-miR-520c-3p	FGF1
hsa-miR-518a-5p	FGF1
hsa-miR-500a-5p	FGF1
hsa-miR-500a-5p	FGF1
hsa-miR-500a-5p	FGF1
hsa-miR-500a-3p	FGF1
hsa-miR-500a-3p	FGF1
hsa-miR-501-5p	FGF1
hsa-miR-501-5p	FGF1
hsa-miR-501-3p	FGF1
hsa-miR-501-3p	FGF1
hsa-miR-502-5p	FGF1
hsa-miR-502-5p	FGF1
hsa-miR-502-5p	FGF1
hsa-miR-502-3p	FGF1
hsa-miR-502-3p	FGF1
hsa-miR-503-5p	FGF1
hsa-miR-504-5p	FGF1
hsa-miR-504-5p	FGF1
hsa-miR-532-3p	FGF1
hsa-miR-92b-3p	FGF1
hsa-miR-561-5p	FGF1
hsa-miR-551b-3p	FGF1
hsa-miR-551b-3p	FGF1
hsa-miR-574-3p	FGF1
hsa-miR-584-5p	FGF1
hsa-miR-589-5p	FGF1
hsa-miR-589-3p	FGF1
hsa-miR-589-3p	FGF1
hsa-miR-550a-5p	FGF1
hsa-miR-550a-3p	FGF1
hsa-miR-605-5p	FGF1
hsa-miR-605-5p	FGF1
hsa-miR-615-5p	FGF1
hsa-miR-615-5p	FGF1
hsa-miR-615-3p	FGF1
hsa-miR-616-5p	FGF1
hsa-miR-616-3p	FGF1
hsa-miR-625-5p	FGF1
hsa-miR-625-3p	FGF1
hsa-miR-629-5p	FGF1
hsa-miR-629-5p	FGF1
hsa-miR-629-3p	FGF1
hsa-miR-33b-3p	FGF1
hsa-miR-33b-3p	FGF1
hsa-miR-652-3p	FGF1
hsa-miR-449b-5p	FGF1
hsa-miR-660-5p	FGF1
hsa-miR-671-5p	FGF1
hsa-miR-671-3p	FGF1
hsa-miR-550a-3-5p	FGF1
hsa-miR-550a-3-5p	FGF1
hsa-miR-1296-5p	FGF1
hsa-miR-1296-5p	FGF1
hsa-miR-1271-5p	FGF1
hsa-miR-1271-3p	FGF1
hsa-miR-1271-3p	FGF1
hsa-miR-1301-3p	FGF1
hsa-miR-1301-3p	FGF1
hsa-miR-449c-5p	FGF1
hsa-miR-766-5p	FGF1
hsa-miR-675-3p	FGF1
hsa-miR-541-3p	FGF1
hsa-miR-541-3p	FGF1
hsa-miR-876-5p	FGF1
hsa-miR-708-5p	FGF1
hsa-miR-708-5p	FGF1
hsa-miR-708-3p	FGF1
hsa-miR-147b-3p	FGF1
hsa-miR-744-5p	FGF1
hsa-miR-744-3p	FGF1
hsa-miR-877-5p	FGF1
hsa-miR-877-5p	FGF1
hsa-miR-873-5p	FGF1
hsa-miR-873-5p	FGF1
hsa-miR-873-3p	FGF1
hsa-miR-873-3p	FGF1
hsa-miR-760	FGF1
hsa-miR-941	FGF1
hsa-miR-942-5p	FGF1
hsa-miR-942-5p	FGF1
hsa-miR-1180-3p	FGF1
hsa-miR-548e-3p	FGF1
hsa-miR-1287-5p	FGF1
hsa-miR-1304-3p	FGF1
hsa-miR-548o-3p	FGF1
hsa-miR-548o-3p	FGF1
hsa-miR-1276	FGF1
hsa-miR-664a-3p	FGF1
hsa-miR-664a-3p	FGF1
hsa-miR-1306-5p	FGF1
hsa-miR-1306-3p	FGF1
hsa-miR-513c-5p	FGF1
hsa-miR-513c-5p	FGF1
hsa-miR-1914-3p	FGF1
hsa-miR-2110	FGF1
hsa-miR-2114-5p	FGF1
hsa-miR-3127-3p	FGF1
hsa-miR-3157-3p	FGF1
hsa-miR-3158-3p	FGF1
hsa-miR-3158-3p	FGF1
hsa-miR-3158-3p	FGF1
hsa-miR-3194-5p	FGF1
hsa-miR-3194-5p	FGF1
hsa-miR-3605-3p	FGF1
hsa-miR-3620-3p	FGF1
hsa-miR-3677-5p	FGF1
hsa-miR-3677-5p	FGF1
hsa-miR-3928-3p	FGF1
hsa-miR-3928-3p	FGF1
hsa-miR-3928-3p	FGF1
hsa-miR-4661-5p	FGF1
hsa-miR-4661-5p	FGF1
hsa-miR-4661-5p	FGF1
hsa-miR-2467-5p	FGF1
hsa-miR-4786-5p	FGF1
hsa-miR-4786-3p	FGF1
hsa-miR-4786-3p	FGF1
hsa-miR-5010-3p	FGF1
hsa-miR-5682	FGF1
hsa-miR-5682	FGF1
hsa-let-7a-5p	FGF1
hsa-let-7b-5p	FGF1
hsa-let-7b-3p	FGF1
hsa-let-7c-5p	FGF1
hsa-let-7d-5p	FGF1
hsa-let-7d-3p	FGF1
hsa-let-7e-5p	FGF1
hsa-let-7e-5p	FGF1
hsa-let-7f-5p	FGF1
hsa-let-7f-5p	FGF1
hsa-miR-15a-5p	FGF1
hsa-miR-15a-3p	FGF1
hsa-miR-15a-3p	FGF1
hsa-miR-16-1-3p	FGF1
hsa-miR-16-1-3p	FGF1
hsa-miR-17-5p	FGF1
hsa-miR-17-3p	FGF1
hsa-miR-18a-5p	FGF1
hsa-miR-20a-5p	FGF1
hsa-miR-20a-5p	FGF1
hsa-miR-20a-3p	FGF1
hsa-miR-21-5p	FGF1
hsa-miR-22-3p	FGF1
hsa-miR-23a-3p	FGF1
hsa-miR-24-1-5p	FGF1
hsa-miR-24-3p	FGF1
hsa-miR-24-2-5p	FGF1
hsa-miR-25-5p	FGF1
hsa-miR-25-5p	FGF1
hsa-miR-25-3p	FGF1
hsa-miR-26b-3p	FGF1
hsa-miR-26b-3p	FGF1
hsa-miR-28-5p	FGF1
hsa-miR-28-3p	FGF1
hsa-miR-30a-3p	FGF1
hsa-miR-31-5p	FGF1
hsa-miR-31-5p	FGF1
hsa-miR-31-5p	FGF1
hsa-miR-31-3p	FGF1
hsa-miR-32-5p	FGF1
hsa-miR-33a-5p	FGF1
hsa-miR-33a-3p	FGF1
hsa-miR-92a-2-5p	FGF1
hsa-miR-92a-2-5p	FGF1
hsa-miR-92a-2-5p	FGF1
hsa-miR-93-5p	FGF1
hsa-miR-93-5p	FGF1
hsa-miR-93-3p	FGF1
hsa-miR-98-5p	FGF1
hsa-miR-99a-5p	FGF1
hsa-miR-99a-3p	FGF1
hsa-miR-100-5p	FGF1
hsa-miR-29b-2-5p	FGF1
hsa-miR-103a-2-5p	FGF1
hsa-miR-106a-5p	FGF1
hsa-miR-106a-5p	FGF1
hsa-miR-192-5p	FGF1
hsa-miR-196a-5p	FGF1
hsa-miR-196a-5p	FGF1
hsa-miR-197-3p	FGF1
hsa-miR-199a-5p	FGF1
hsa-miR-199a-3p	FGF1
hsa-miR-129-5p	FGF1
hsa-miR-30c-5p	FGF1
hsa-miR-30c-5p	FGF1
hsa-miR-30c-2-3p	FGF1
hsa-miR-30c-2-3p	FGF1
hsa-miR-30d-3p	FGF1
hsa-miR-139-5p	FGF1
hsa-miR-139-5p	FGF1
hsa-miR-34a-5p	FGF1
hsa-miR-182-5p	FGF1
hsa-miR-187-5p	FGF1
hsa-miR-187-3p	FGF1
hsa-miR-199b-5p	FGF1
hsa-miR-199b-5p	FGF1
hsa-miR-199b-3p	FGF1
hsa-miR-203a-3p	FGF1
hsa-miR-204-5p	FGF1
hsa-miR-205-5p	FGF1
hsa-miR-205-5p	FGF1
hsa-miR-205-5p	FGF1
hsa-miR-210-3p	FGF1
hsa-miR-212-3p	FGF1
hsa-miR-212-3p	FGF1
hsa-miR-181a-3p	FGF1
hsa-miR-219a-1-3p	FGF1
hsa-miR-221-5p	FGF1
hsa-miR-221-3p	FGF1
hsa-miR-221-3p	FGF1
hsa-miR-221-3p	FGF1
hsa-miR-222-5p	FGF1
hsa-miR-222-5p	FGF1
hsa-miR-224-3p	FGF1
hsa-miR-200b-5p	FGF1
hsa-miR-200b-5p	FGF1
hsa-let-7g-5p	FGF1
hsa-let-7g-3p	FGF1
hsa-let-7i-5p	FGF1
hsa-let-7i-3p	FGF1
hsa-miR-1-3p	FGF1
hsa-miR-15b-5p	FGF1
hsa-miR-30b-5p	FGF1
hsa-miR-30b-3p	FGF1
hsa-miR-122-5p	FGF1
hsa-miR-122-5p	FGF1
hsa-miR-124-3p	FGF1
hsa-miR-124-3p	FGF1
hsa-miR-125b-5p	FGF1
hsa-miR-125b-1-3p	FGF1
hsa-miR-125b-1-3p	FGF1
hsa-miR-125b-1-3p	FGF1
hsa-miR-125b-1-3p	FGF1
hsa-miR-128-3p	FGF1
hsa-miR-128-3p	FGF1
hsa-miR-130a-3p	FGF1
hsa-miR-137-3p	FGF1
hsa-miR-138-5p	FGF1
hsa-miR-140-5p	FGF1
hsa-miR-140-3p	FGF1
hsa-miR-141-5p	FGF1
hsa-miR-145-3p	FGF1
hsa-miR-145-3p	FGF1
hsa-miR-191-5p	FGF1
hsa-miR-9-5p	FGF1
hsa-miR-125a-5p	FGF1
hsa-miR-125a-3p	FGF1
hsa-miR-125a-3p	FGF1
hsa-miR-127-3p	FGF1
hsa-miR-127-3p	FGF1
hsa-miR-129-2-3p	FGF1
hsa-miR-150-5p	FGF1
hsa-miR-185-5p	FGF1
hsa-miR-185-3p	FGF1
hsa-miR-186-5p	FGF1
hsa-miR-186-3p	FGF1
hsa-miR-188-3p	FGF1
hsa-miR-188-3p	FGF1
hsa-miR-320a-3p	FGF1
hsa-miR-200c-5p	FGF1
hsa-miR-155-5p	FGF1
hsa-miR-155-5p	FGF1
hsa-miR-194-3p	FGF1
hsa-miR-106b-5p	FGF1
hsa-miR-30c-1-3p	FGF1
hsa-miR-30c-1-3p	FGF1
hsa-miR-34b-3p	FGF1
hsa-miR-34c-5p	FGF1
hsa-miR-301a-5p	FGF1
hsa-miR-301a-3p	FGF1
hsa-miR-99b-5p	FGF1
hsa-miR-99b-5p	FGF1
hsa-miR-296-3p	FGF1
hsa-miR-296-3p	FGF1
hsa-miR-361-5p	FGF1
hsa-miR-365a-3p	FGF1
hsa-miR-365b-5p	FGF1
hsa-miR-365b-5p	FGF1
hsa-miR-365b-3p	FGF1
hsa-miR-375-3p	FGF1
hsa-miR-377-5p	FGF1
hsa-miR-377-5p	FGF1
hsa-miR-377-5p	FGF1
hsa-miR-378a-5p	FGF1
hsa-miR-378a-3p	FGF1
hsa-miR-380-5p	FGF1
hsa-miR-330-3p	FGF1
hsa-miR-330-3p	FGF1
hsa-miR-330-3p	FGF1
hsa-miR-342-5p	FGF1
hsa-miR-342-3p	FGF1
hsa-miR-323a-3p	FGF1
hsa-miR-148b-5p	FGF1
hsa-miR-148b-3p	FGF1
hsa-miR-324-3p	FGF1
hsa-miR-324-3p	FGF1
hsa-miR-339-5p	FGF1
hsa-miR-339-5p	FGF1
hsa-miR-339-3p	FGF1
hsa-miR-339-3p	FGF1
hsa-miR-339-3p	FGF1
hsa-miR-345-5p	FGF1
hsa-miR-196b-5p	FGF1
hsa-miR-196b-5p	FGF1
hsa-miR-196b-5p	FGF1
hsa-miR-196b-5p	FGF1
hsa-miR-423-5p	FGF1
hsa-miR-423-5p	FGF1
hsa-miR-423-5p	FGF1
hsa-miR-424-5p	FGF1
hsa-miR-424-3p	FGF1
hsa-miR-425-3p	FGF1
hsa-miR-18b-5p	FGF1
hsa-miR-20b-5p	FGF1
hsa-miR-20b-3p	FGF1
hsa-miR-452-5p	FGF1
hsa-miR-452-3p	FGF1
hsa-miR-483-5p	FGF1
hsa-miR-488-5p	FGF1
hsa-miR-488-5p	FGF1
hsa-miR-488-5p	FGF1
hsa-miR-490-5p	FGF1
hsa-miR-490-5p	FGF1
hsa-miR-491-5p	FGF1
hsa-miR-491-5p	FGF1
hsa-miR-511-5p	FGF1
hsa-miR-146b-3p	FGF1
hsa-miR-146b-3p	FGF1
hsa-miR-146b-3p	FGF1
hsa-miR-193b-3p	FGF1
hsa-miR-193b-3p	FGF1
hsa-miR-512-3p	FGF1
hsa-miR-512-3p	FGF1
hsa-miR-520a-3p	FGF1
hsa-miR-526b-5p	FGF1
hsa-miR-518f-3p	FGF1
hsa-miR-520c-3p	FGF1
hsa-miR-520c-3p	FGF1
hsa-miR-518a-5p	FGF1
hsa-miR-500a-5p	FGF1
hsa-miR-500a-5p	FGF1
hsa-miR-500a-5p	FGF1
hsa-miR-500a-3p	FGF1
hsa-miR-500a-3p	FGF1
hsa-miR-501-5p	FGF1
hsa-miR-501-5p	FGF1
hsa-miR-501-3p	FGF1
hsa-miR-501-3p	FGF1
hsa-miR-502-5p	FGF1
hsa-miR-502-5p	FGF1
hsa-miR-502-3p	FGF1
hsa-miR-502-3p	FGF1
hsa-miR-502-3p	FGF1
hsa-miR-504-5p	FGF1
hsa-miR-504-5p	FGF1
hsa-miR-532-5p	FGF1
hsa-miR-92b-3p	FGF1
hsa-miR-92b-3p	FGF1
hsa-miR-561-5p	FGF1
hsa-miR-551b-3p	FGF1
hsa-miR-551b-3p	FGF1
hsa-miR-574-3p	FGF1
hsa-miR-584-5p	FGF1
hsa-miR-589-5p	FGF1
hsa-miR-589-3p	FGF1
hsa-miR-589-3p	FGF1
hsa-miR-550a-5p	FGF1
hsa-miR-550a-3p	FGF1
hsa-miR-597-3p	FGF1
hsa-miR-605-5p	FGF1
hsa-miR-605-5p	FGF1
hsa-miR-615-5p	FGF1
hsa-miR-615-5p	FGF1
hsa-miR-615-3p	FGF1
hsa-miR-616-3p	FGF1
hsa-miR-616-3p	FGF1
hsa-miR-625-5p	FGF1
hsa-miR-629-5p	FGF1
hsa-miR-629-5p	FGF1
hsa-miR-629-5p	FGF1
hsa-miR-629-3p	FGF1
hsa-miR-33b-3p	FGF1
hsa-miR-33b-3p	FGF1
hsa-miR-652-3p	FGF1
hsa-miR-449b-5p	FGF1
hsa-miR-660-5p	FGF1
hsa-miR-671-5p	FGF1
hsa-miR-671-3p	FGF1
hsa-miR-550a-3-5p	FGF1
hsa-miR-550a-3-5p	FGF1
hsa-miR-1296-5p	FGF1
hsa-miR-1296-5p	FGF1
hsa-miR-1271-5p	FGF1
hsa-miR-1271-3p	FGF1
hsa-miR-1271-3p	FGF1
hsa-miR-1301-3p	FGF1
hsa-miR-1301-3p	FGF1
hsa-miR-449c-5p	FGF1
hsa-miR-766-5p	FGF1
hsa-miR-675-3p	FGF1
hsa-miR-541-3p	FGF1
hsa-miR-541-3p	FGF1
hsa-miR-876-5p	FGF1
hsa-miR-708-5p	FGF1
hsa-miR-708-5p	FGF1
hsa-miR-708-3p	FGF1
hsa-miR-744-5p	FGF1
hsa-miR-744-3p	FGF1
hsa-miR-877-5p	FGF1
hsa-miR-877-5p	FGF1
hsa-miR-873-5p	FGF1
hsa-miR-873-5p	FGF1
hsa-miR-873-3p	FGF1
hsa-miR-873-3p	FGF1
hsa-miR-760	FGF1
hsa-miR-941	FGF1
hsa-miR-942-5p	FGF1
hsa-miR-942-5p	FGF1
hsa-miR-1180-3p	FGF1
hsa-miR-548e-3p	FGF1
hsa-miR-1287-5p	FGF1
hsa-miR-1304-3p	FGF1
hsa-miR-548o-3p	FGF1
hsa-miR-548o-3p	FGF1
hsa-miR-1276	FGF1
hsa-miR-664a-3p	FGF1
hsa-miR-664a-3p	FGF1
hsa-miR-1306-5p	FGF1
hsa-miR-1306-3p	FGF1
hsa-miR-513c-5p	FGF1
hsa-miR-1914-3p	FGF1
hsa-miR-2110	FGF1
hsa-miR-2114-5p	FGF1
hsa-miR-3127-3p	FGF1
hsa-miR-3157-3p	FGF1
hsa-miR-3158-3p	FGF1
hsa-miR-3158-3p	FGF1
hsa-miR-3158-3p	FGF1
hsa-miR-3194-5p	FGF1
hsa-miR-3605-3p	FGF1
hsa-miR-3620-3p	FGF1
hsa-miR-3677-5p	FGF1
hsa-miR-3677-5p	FGF1
hsa-miR-676-3p	FGF1
hsa-miR-3928-3p	FGF1
hsa-miR-3928-3p	FGF1
hsa-miR-3928-3p	FGF1
hsa-miR-4661-5p	FGF1
hsa-miR-4661-5p	FGF1
hsa-miR-4661-5p	FGF1
hsa-miR-2467-5p	FGF1
hsa-miR-2467-5p	FGF1
hsa-miR-4786-5p	FGF1
hsa-miR-4786-3p	FGF1
hsa-miR-5010-3p	FGF1
hsa-miR-5682	FGF1
hsa-miR-5682	FGF1
hsa-let-7a-5p	FGF1
hsa-let-7b-5p	FGF1
hsa-let-7b-5p	FGF1
hsa-let-7c-5p	FGF1
hsa-let-7d-5p	FGF1
hsa-let-7e-5p	FGF1
hsa-let-7f-5p	FGF1
hsa-miR-15a-5p	FGF1
hsa-miR-15a-3p	FGF1
hsa-miR-15a-3p	FGF1
hsa-miR-16-1-3p	FGF1
hsa-miR-16-1-3p	FGF1
hsa-miR-17-5p	FGF1
hsa-miR-17-3p	FGF1
hsa-miR-18a-5p	FGF1
hsa-miR-18a-5p	FGF1
hsa-miR-18a-5p	FGF1
hsa-miR-20a-5p	FGF1
hsa-miR-20a-3p	FGF1
hsa-miR-21-5p	FGF1
hsa-miR-22-3p	FGF1
hsa-miR-23a-3p	FGF1
hsa-miR-24-1-5p	FGF1
hsa-miR-24-3p	FGF1
hsa-miR-24-2-5p	FGF1
hsa-miR-25-5p	FGF1
hsa-miR-25-5p	FGF1
hsa-miR-25-3p	FGF1
hsa-miR-26a-5p	FGF1
hsa-miR-27a-5p	FGF1
hsa-miR-27a-5p	FGF1
hsa-miR-27a-5p	FGF1
hsa-miR-28-5p	FGF1
hsa-miR-28-3p	FGF1
hsa-miR-30a-3p	FGF1
hsa-miR-31-5p	FGF1
hsa-miR-31-3p	FGF1
hsa-miR-33a-3p	FGF1
hsa-miR-92a-2-5p	FGF1
hsa-miR-92a-2-5p	FGF1
hsa-miR-92a-2-5p	FGF1
hsa-miR-93-5p	FGF1
hsa-miR-93-5p	FGF1
hsa-miR-93-3p	FGF1
hsa-miR-99a-5p	FGF1
hsa-miR-99a-3p	FGF1
hsa-miR-100-5p	FGF1
hsa-miR-29b-2-5p	FGF1
hsa-miR-103a-2-5p	FGF1
hsa-miR-106a-5p	FGF1
hsa-miR-106a-5p	FGF1
hsa-miR-197-3p	FGF1
hsa-miR-197-3p	FGF1
hsa-miR-199a-5p	FGF1
hsa-miR-199a-3p	FGF1
hsa-miR-199a-3p	FGF1
hsa-miR-129-5p	FGF1
hsa-miR-30c-5p	FGF1
hsa-miR-30c-2-3p	FGF1
hsa-miR-30c-2-3p	FGF1
hsa-miR-30d-3p	FGF1
hsa-miR-139-5p	FGF1
hsa-miR-139-5p	FGF1
hsa-miR-34a-5p	FGF1
hsa-miR-187-5p	FGF1
hsa-miR-187-5p	FGF1
hsa-miR-187-3p	FGF1
hsa-miR-199b-5p	FGF1
hsa-miR-199b-3p	FGF1
hsa-miR-199b-3p	FGF1
hsa-miR-205-5p	FGF1
hsa-miR-205-5p	FGF1
hsa-miR-210-3p	FGF1
hsa-miR-212-3p	FGF1
hsa-miR-181a-3p	FGF1
hsa-miR-218-2-3p	FGF1
hsa-miR-221-5p	FGF1
hsa-miR-221-3p	FGF1
hsa-miR-221-3p	FGF1
hsa-miR-221-3p	FGF1
hsa-miR-222-5p	FGF1
hsa-miR-222-5p	FGF1
hsa-miR-200b-5p	FGF1
hsa-let-7g-5p	FGF1
hsa-let-7g-5p	FGF1
hsa-let-7g-3p	FGF1
hsa-let-7i-5p	FGF1
hsa-let-7i-3p	FGF1
hsa-miR-1-3p	FGF1
hsa-miR-30b-5p	FGF1
hsa-miR-30b-3p	FGF1
hsa-miR-122-5p	FGF1
hsa-miR-122-5p	FGF1
hsa-miR-124-3p	FGF1
hsa-miR-124-3p	FGF1
hsa-miR-125b-5p	FGF1
hsa-miR-125b-1-3p	FGF1
hsa-miR-125b-1-3p	FGF1
hsa-miR-128-3p	FGF1
hsa-miR-133a-3p	FGF1
hsa-miR-137-3p	FGF1
hsa-miR-138-5p	FGF1
hsa-miR-141-5p	FGF1
hsa-miR-143-3p	FGF1
hsa-miR-145-3p	FGF1
hsa-miR-145-3p	FGF1
hsa-miR-145-3p	FGF1
hsa-miR-9-5p	FGF1
hsa-miR-125a-5p	FGF1
hsa-miR-125a-3p	FGF1
hsa-miR-125a-3p	FGF1
hsa-miR-127-3p	FGF1
hsa-miR-129-2-3p	FGF1
hsa-miR-129-2-3p	FGF1
hsa-miR-150-5p	FGF1
hsa-miR-185-5p	FGF1
hsa-miR-186-3p	FGF1
hsa-miR-188-3p	FGF1
hsa-miR-188-3p	FGF1
hsa-miR-320a-3p	FGF1
hsa-miR-155-5p	FGF1
hsa-miR-194-3p	FGF1
hsa-miR-30c-1-3p	FGF1
hsa-miR-30c-1-3p	FGF1
hsa-miR-34b-3p	FGF1
hsa-miR-34c-5p	FGF1
hsa-miR-301a-5p	FGF1
hsa-miR-99b-5p	FGF1
hsa-miR-99b-5p	FGF1
hsa-miR-99b-3p	FGF1
hsa-miR-296-3p	FGF1
hsa-miR-296-3p	FGF1
hsa-miR-361-5p	FGF1
hsa-miR-361-3p	FGF1
hsa-miR-365b-5p	FGF1
hsa-miR-375-3p	FGF1
hsa-miR-377-5p	FGF1
hsa-miR-377-5p	FGF1
hsa-miR-377-5p	FGF1
hsa-miR-377-3p	FGF1
hsa-miR-378a-5p	FGF1
hsa-miR-378a-3p	FGF1
hsa-miR-382-5p	FGF1
hsa-miR-330-5p	FGF1
hsa-miR-330-3p	FGF1
hsa-miR-330-3p	FGF1
hsa-miR-330-3p	FGF1
hsa-miR-342-5p	FGF1
hsa-miR-342-3p	FGF1
hsa-miR-323a-3p	FGF1
hsa-miR-135b-3p	FGF1
hsa-miR-148b-5p	FGF1
hsa-miR-148b-3p	FGF1
hsa-miR-324-3p	FGF1
hsa-miR-339-5p	FGF1
hsa-miR-339-3p	FGF1
hsa-miR-339-3p	FGF1
hsa-miR-339-3p	FGF1
hsa-miR-345-5p	FGF1
hsa-miR-196b-5p	FGF1
hsa-miR-196b-5p	FGF1
hsa-miR-196b-5p	FGF1
hsa-miR-196b-5p	FGF1
hsa-miR-423-5p	FGF1
hsa-miR-423-5p	FGF1
hsa-miR-423-5p	FGF1
hsa-miR-424-5p	FGF1
hsa-miR-425-3p	FGF1
hsa-miR-18b-5p	FGF1
hsa-miR-20b-5p	FGF1
hsa-miR-20b-3p	FGF1
hsa-miR-452-3p	FGF1
hsa-miR-483-5p	FGF1
hsa-miR-488-5p	FGF1
hsa-miR-488-5p	FGF1
hsa-miR-488-5p	FGF1
hsa-miR-490-5p	FGF1
hsa-miR-490-5p	FGF1
hsa-miR-491-5p	FGF1
hsa-miR-491-5p	FGF1
hsa-miR-511-5p	FGF1
hsa-miR-146b-3p	FGF1
hsa-miR-146b-3p	FGF1
hsa-miR-193b-5p	FGF1
hsa-miR-193b-3p	FGF1
hsa-miR-193b-3p	FGF1
hsa-miR-193b-3p	FGF1
hsa-miR-512-3p	FGF1
hsa-miR-512-3p	FGF1
hsa-miR-520a-3p	FGF1
hsa-miR-500a-5p	FGF1
hsa-miR-500a-3p	FGF1
hsa-miR-500a-3p	FGF1
hsa-miR-501-5p	FGF1
hsa-miR-501-5p	FGF1
hsa-miR-501-3p	FGF1
hsa-miR-501-3p	FGF1
hsa-miR-502-5p	FGF1
hsa-miR-502-5p	FGF1
hsa-miR-502-5p	FGF1
hsa-miR-502-3p	FGF1
hsa-miR-502-3p	FGF1
hsa-miR-502-3p	FGF1
hsa-miR-503-5p	FGF1
hsa-miR-503-5p	FGF1
hsa-miR-504-5p	FGF1
hsa-miR-504-5p	FGF1
hsa-miR-532-3p	FGF1
hsa-miR-92b-3p	FGF1
hsa-miR-561-5p	FGF1
hsa-miR-551b-3p	FGF1
hsa-miR-574-3p	FGF1
hsa-miR-584-5p	FGF1
hsa-miR-589-3p	FGF1
hsa-miR-589-3p	FGF1
hsa-miR-589-3p	FGF1
hsa-miR-550a-3p	FGF1
hsa-miR-605-5p	FGF1
hsa-miR-605-5p	FGF1
hsa-miR-615-5p	FGF1
hsa-miR-615-5p	FGF1
hsa-miR-615-3p	FGF1
hsa-miR-616-3p	FGF1
hsa-miR-625-5p	FGF1
hsa-miR-625-3p	FGF1
hsa-miR-33b-3p	FGF1
hsa-miR-33b-3p	FGF1
hsa-miR-652-3p	FGF1
hsa-miR-449b-5p	FGF1
hsa-miR-660-5p	FGF1
hsa-miR-671-5p	FGF1
hsa-miR-671-3p	FGF1
hsa-miR-671-3p	FGF1
hsa-miR-550a-3-5p	FGF1
hsa-miR-550a-3-5p	FGF1
hsa-miR-1296-5p	FGF1
hsa-miR-1296-5p	FGF1
hsa-miR-1271-5p	FGF1
hsa-miR-1271-5p	FGF1
hsa-miR-1271-3p	FGF1
hsa-miR-1271-3p	FGF1
hsa-miR-1301-3p	FGF1
hsa-miR-1301-3p	FGF1
hsa-miR-769-5p	FGF1
hsa-miR-766-5p	FGF1
hsa-miR-766-5p	FGF1
hsa-miR-766-3p	FGF1
hsa-miR-675-3p	FGF1
hsa-miR-541-3p	FGF1
hsa-miR-876-5p	FGF1
hsa-miR-708-5p	FGF1
hsa-miR-708-5p	FGF1
hsa-miR-708-3p	FGF1
hsa-miR-744-5p	FGF1
hsa-miR-744-3p	FGF1
hsa-miR-877-5p	FGF1
hsa-miR-877-5p	FGF1
hsa-miR-873-5p	FGF1
hsa-miR-873-3p	FGF1
hsa-miR-873-3p	FGF1
hsa-miR-760	FGF1
hsa-miR-941	FGF1
hsa-miR-942-5p	FGF1
hsa-miR-942-5p	FGF1
hsa-miR-1180-3p	FGF1
hsa-miR-548e-3p	FGF1
hsa-miR-1287-5p	FGF1
hsa-miR-1304-3p	FGF1
hsa-miR-1276	FGF1
hsa-miR-1276	FGF1
hsa-miR-664a-3p	FGF1
hsa-miR-664a-3p	FGF1
hsa-miR-1306-5p	FGF1
hsa-miR-1306-3p	FGF1
hsa-miR-513c-5p	FGF1
hsa-miR-1910-5p	FGF1
hsa-miR-1914-3p	FGF1
hsa-miR-2110	FGF1
hsa-miR-2114-5p	FGF1
hsa-miR-3157-5p	FGF1
hsa-miR-3157-3p	FGF1
hsa-miR-3157-3p	FGF1
hsa-miR-3158-3p	FGF1
hsa-miR-3158-3p	FGF1
hsa-miR-3194-5p	FGF1
hsa-miR-3194-5p	FGF1
hsa-miR-3619-3p	FGF1
hsa-miR-3620-3p	FGF1
hsa-miR-3928-3p	FGF1
hsa-miR-3928-3p	FGF1
hsa-miR-3928-3p	FGF1
hsa-miR-4661-5p	FGF1
hsa-miR-4661-5p	FGF1
hsa-miR-2467-5p	FGF1
hsa-miR-2467-5p	FGF1
hsa-miR-4786-5p	FGF1
hsa-miR-4786-3p	FGF1
hsa-miR-5010-3p	FGF1
hsa-miR-5682	FGF1
hsa-let-7a-5p	CDK8
hsa-let-7a-5p	CDK8
hsa-let-7b-3p	CDK8
hsa-let-7c-5p	CDK8
hsa-let-7d-5p	CDK8
hsa-let-7e-5p	CDK8
hsa-miR-15a-5p	CDK8
hsa-miR-16-1-3p	CDK8
hsa-miR-19a-3p	CDK8
hsa-miR-19b-1-5p	CDK8
hsa-miR-19b-3p	CDK8
hsa-miR-22-3p	CDK8
hsa-miR-24-1-5p	CDK8
hsa-miR-24-2-5p	CDK8
hsa-miR-26a-5p	CDK8
hsa-miR-26b-5p	CDK8
hsa-miR-28-5p	CDK8
hsa-miR-31-3p	CDK8
hsa-miR-93-3p	CDK8
hsa-miR-96-5p	CDK8
hsa-miR-103a-3p	CDK8
hsa-miR-107	CDK8
hsa-miR-107	CDK8
hsa-miR-30d-3p	CDK8
hsa-miR-139-5p	CDK8
hsa-miR-181b-3p	CDK8
hsa-miR-183-5p	CDK8
hsa-miR-187-5p	CDK8
hsa-miR-222-3p	CDK8
hsa-let-7g-3p	CDK8
hsa-let-7g-3p	CDK8
hsa-miR-124-5p	CDK8
hsa-miR-135a-5p	CDK8
hsa-miR-143-3p	CDK8
hsa-miR-129-2-3p	CDK8
hsa-miR-188-3p	CDK8
hsa-miR-194-5p	CDK8
hsa-miR-30c-1-3p	CDK8
hsa-miR-200a-5p	CDK8
hsa-miR-130b-5p	CDK8
hsa-miR-377-5p	CDK8
hsa-miR-378a-5p	CDK8
hsa-miR-378a-5p	CDK8
hsa-miR-135b-5p	CDK8
hsa-miR-324-3p	CDK8
hsa-miR-345-5p	CDK8
hsa-miR-196b-3p	CDK8
hsa-miR-486-5p	CDK8
hsa-miR-193b-3p	CDK8
hsa-miR-520a-3p	CDK8
hsa-miR-499a-3p	CDK8
hsa-miR-500a-3p	CDK8
hsa-miR-502-3p	CDK8
hsa-miR-502-3p	CDK8
hsa-miR-503-5p	CDK8
hsa-miR-509-5p	CDK8
hsa-miR-509-5p	CDK8
hsa-miR-551b-3p	CDK8
hsa-miR-574-5p	CDK8
hsa-miR-589-3p	CDK8
hsa-miR-550a-5p	CDK8
hsa-miR-616-3p	CDK8
hsa-miR-1296-5p	CDK8
hsa-miR-1271-5p	CDK8
hsa-miR-449c-5p	CDK8
hsa-miR-766-5p	CDK8
hsa-miR-766-3p	CDK8
hsa-miR-541-3p	CDK8
hsa-miR-509-3-5p	CDK8
hsa-miR-1276	CDK8
hsa-miR-513c-5p	CDK8
hsa-miR-3157-3p	CDK8
hsa-miR-3194-5p	CDK8
hsa-miR-3677-5p	CDK8
hsa-miR-4786-5p	CDK8
hsa-miR-4786-3p	CDK8
hsa-let-7f-5p	CDH19
hsa-miR-15a-3p	CDH19
hsa-miR-15a-3p	CDH19
hsa-miR-16-1-3p	CDH19
hsa-miR-18a-5p	CDH19
hsa-miR-18a-3p	CDH19
hsa-miR-23a-3p	CDH19
hsa-miR-23a-3p	CDH19
hsa-miR-24-1-5p	CDH19
hsa-miR-24-3p	CDH19
hsa-miR-24-2-5p	CDH19
hsa-miR-25-5p	CDH19
hsa-miR-26b-3p	CDH19
hsa-miR-27a-5p	CDH19
hsa-miR-27a-5p	CDH19
hsa-miR-28-5p	CDH19
hsa-miR-28-3p	CDH19
hsa-miR-31-5p	CDH19
hsa-miR-92a-3p	CDH19
hsa-miR-92a-3p	CDH19
hsa-miR-93-5p	CDH19
hsa-miR-93-5p	CDH19
hsa-miR-29b-1-5p	CDH19
hsa-miR-29b-3p	CDH19
hsa-miR-103a-3p	CDH19
hsa-miR-107	CDH19
hsa-miR-196a-5p	CDH19
hsa-miR-197-3p	CDH19
hsa-miR-148a-3p	CDH19
hsa-miR-139-5p	CDH19
hsa-miR-10a-5p	CDH19
hsa-miR-34a-5p	CDH19
hsa-miR-181a-2-3p	CDH19
hsa-miR-181c-3p	CDH19
hsa-miR-183-5p	CDH19
hsa-miR-187-3p	CDH19
hsa-miR-187-3p	CDH19
hsa-miR-204-5p	CDH19
hsa-miR-204-5p	CDH19
hsa-miR-205-5p	CDH19
hsa-miR-210-3p	CDH19
hsa-miR-210-3p	CDH19
hsa-miR-216a-5p	CDH19
hsa-miR-216a-5p	CDH19
hsa-miR-219a-1-3p	CDH19
hsa-miR-219a-1-3p	CDH19
hsa-miR-221-3p	CDH19
hsa-miR-200b-5p	CDH19
hsa-let-7g-3p	CDH19
hsa-let-7i-5p	CDH19
hsa-miR-15b-5p	CDH19
hsa-miR-15b-5p	CDH19
hsa-miR-122-5p	CDH19
hsa-miR-124-3p	CDH19
hsa-miR-124-3p	CDH19
hsa-miR-125b-1-3p	CDH19
hsa-miR-125b-1-3p	CDH19
hsa-miR-125b-1-3p	CDH19
hsa-miR-132-5p	CDH19
hsa-miR-138-5p	CDH19
hsa-miR-145-3p	CDH19
hsa-miR-125a-3p	CDH19
hsa-miR-125a-3p	CDH19
hsa-miR-127-3p	CDH19
hsa-miR-149-5p	CDH19
hsa-miR-185-5p	CDH19
hsa-miR-185-5p	CDH19
hsa-miR-188-5p	CDH19
hsa-miR-194-5p	CDH19
hsa-miR-320a-3p	CDH19
hsa-miR-320a-3p	CDH19
hsa-miR-200c-3p	CDH19
hsa-miR-155-3p	CDH19
hsa-miR-194-3p	CDH19
hsa-miR-194-3p	CDH19
hsa-miR-106b-3p	CDH19
hsa-miR-106b-3p	CDH19
hsa-miR-29c-3p	CDH19
hsa-miR-30c-1-3p	CDH19
hsa-miR-34c-5p	CDH19
hsa-miR-34c-5p	CDH19
hsa-miR-99b-3p	CDH19
hsa-miR-99b-3p	CDH19
hsa-miR-365b-5p	CDH19
hsa-miR-377-5p	CDH19
hsa-miR-378a-3p	CDH19
hsa-miR-378a-3p	CDH19
hsa-miR-135b-3p	CDH19
hsa-miR-135b-3p	CDH19
hsa-miR-135b-3p	CDH19
hsa-miR-148b-5p	CDH19
hsa-miR-148b-5p	CDH19
hsa-miR-324-3p	CDH19
hsa-miR-324-3p	CDH19
hsa-miR-338-3p	CDH19
hsa-miR-339-5p	CDH19
hsa-miR-339-5p	CDH19
hsa-miR-339-3p	CDH19
hsa-miR-345-5p	CDH19
hsa-miR-423-5p	CDH19
hsa-miR-423-5p	CDH19
hsa-miR-423-3p	CDH19
hsa-miR-424-5p	CDH19
hsa-miR-424-3p	CDH19
hsa-miR-18b-3p	CDH19
hsa-miR-20b-3p	CDH19
hsa-miR-483-5p	CDH19
hsa-miR-486-5p	CDH19
hsa-miR-490-5p	CDH19
hsa-miR-490-5p	CDH19
hsa-miR-491-5p	CDH19
hsa-miR-491-5p	CDH19
hsa-miR-511-5p	CDH19
hsa-miR-511-5p	CDH19
hsa-miR-146b-3p	CDH19
hsa-miR-193b-5p	CDH19
hsa-miR-193b-5p	CDH19
hsa-miR-512-3p	CDH19
hsa-miR-499a-3p	CDH19
hsa-miR-500a-5p	CDH19
hsa-miR-500a-3p	CDH19
hsa-miR-502-5p	CDH19
hsa-miR-503-5p	CDH19
hsa-miR-532-5p	CDH19
hsa-miR-92b-3p	CDH19
hsa-miR-92b-3p	CDH19
hsa-miR-551b-3p	CDH19
hsa-miR-574-5p	CDH19
hsa-miR-574-5p	CDH19
hsa-miR-574-3p	CDH19
hsa-miR-576-5p	CDH19
hsa-miR-584-5p	CDH19
hsa-miR-548b-3p	CDH19
hsa-miR-550a-5p	CDH19
hsa-miR-597-3p	CDH19
hsa-miR-598-3p	CDH19
hsa-miR-605-5p	CDH19
hsa-miR-615-5p	CDH19
hsa-miR-615-3p	CDH19
hsa-miR-616-3p	CDH19
hsa-miR-616-3p	CDH19
hsa-miR-625-5p	CDH19
hsa-miR-625-3p	CDH19
hsa-miR-629-5p	CDH19
hsa-miR-629-3p	CDH19
hsa-miR-33b-3p	CDH19
hsa-miR-652-3p	CDH19
hsa-miR-449b-5p	CDH19
hsa-miR-671-5p	CDH19
hsa-miR-671-3p	CDH19
hsa-miR-550a-3-5p	CDH19
hsa-miR-1296-5p	CDH19
hsa-miR-1296-5p	CDH19
hsa-miR-1271-3p	CDH19
hsa-miR-1271-3p	CDH19
hsa-miR-1301-3p	CDH19
hsa-miR-1301-3p	CDH19
hsa-miR-449c-5p	CDH19
hsa-miR-449c-5p	CDH19
hsa-miR-769-5p	CDH19
hsa-miR-766-5p	CDH19
hsa-miR-766-5p	CDH19
hsa-miR-541-3p	CDH19
hsa-miR-541-3p	CDH19
hsa-miR-708-5p	CDH19
hsa-miR-744-5p	CDH19
hsa-miR-744-5p	CDH19
hsa-miR-744-5p	CDH19
hsa-miR-877-5p	CDH19
hsa-miR-877-5p	CDH19
hsa-miR-873-3p	CDH19
hsa-miR-760	CDH19
hsa-miR-941	CDH19
hsa-miR-942-5p	CDH19
hsa-miR-1180-3p	CDH19
hsa-miR-1287-5p	CDH19
hsa-miR-1304-5p	CDH19
hsa-miR-1276	CDH19
hsa-miR-1914-3p	CDH19
hsa-miR-1914-3p	CDH19
hsa-miR-1914-3p	CDH19
hsa-miR-2110	CDH19
hsa-miR-2110	CDH19
hsa-miR-3127-3p	CDH19
hsa-miR-3145-3p	CDH19
hsa-miR-3158-3p	CDH19
hsa-miR-3194-5p	CDH19
hsa-miR-3619-3p	CDH19
hsa-miR-676-3p	CDH19
hsa-miR-4661-5p	CDH19
hsa-miR-4786-5p	CDH19
hsa-miR-4786-3p	CDH19
hsa-miR-4786-3p	CDH19
hsa-miR-5010-3p	CDH19
hsa-miR-5010-3p	CDH19
hsa-miR-5682	CDH19
hsa-let-7b-3p	HSP90AB1
hsa-let-7e-5p	HSP90AB1
hsa-miR-96-5p	HSP90AB1
hsa-miR-99a-5p	HSP90AB1
hsa-miR-103a-2-5p	HSP90AB1
hsa-miR-103a-3p	HSP90AB1
hsa-miR-107	HSP90AB1
hsa-miR-30c-2-3p	HSP90AB1
hsa-miR-181a-5p	HSP90AB1
hsa-miR-181b-5p	HSP90AB1
hsa-miR-181b-5p	HSP90AB1
hsa-miR-181c-5p	HSP90AB1
hsa-miR-187-5p	HSP90AB1
hsa-miR-125b-1-3p	HSP90AB1
hsa-miR-125a-3p	HSP90AB1
hsa-miR-185-3p	HSP90AB1
hsa-miR-188-5p	HSP90AB1
hsa-miR-320a-3p	HSP90AB1
hsa-miR-320a-3p	HSP90AB1
hsa-miR-194-3p	HSP90AB1
hsa-miR-30c-1-3p	HSP90AB1
hsa-miR-365b-5p	HSP90AB1
hsa-miR-378a-3p	HSP90AB1
hsa-miR-342-5p	HSP90AB1
hsa-miR-425-3p	HSP90AB1
hsa-miR-181d-5p	HSP90AB1
hsa-miR-181d-5p	HSP90AB1
hsa-miR-501-3p	HSP90AB1
hsa-miR-503-5p	HSP90AB1
hsa-miR-615-5p	HSP90AB1
hsa-miR-33b-3p	HSP90AB1
hsa-miR-541-3p	HSP90AB1
hsa-miR-708-3p	HSP90AB1
hsa-miR-1304-5p	HSP90AB1
hsa-let-7b-3p	HSP90AB1
hsa-let-7e-5p	HSP90AB1
hsa-miR-96-5p	HSP90AB1
hsa-miR-99a-5p	HSP90AB1
hsa-miR-103a-2-5p	HSP90AB1
hsa-miR-103a-3p	HSP90AB1
hsa-miR-107	HSP90AB1
hsa-miR-30c-2-3p	HSP90AB1
hsa-miR-181a-5p	HSP90AB1
hsa-miR-181b-5p	HSP90AB1
hsa-miR-181b-5p	HSP90AB1
hsa-miR-181c-5p	HSP90AB1
hsa-miR-125b-1-3p	HSP90AB1
hsa-miR-125a-3p	HSP90AB1
hsa-miR-320a-3p	HSP90AB1
hsa-miR-320a-3p	HSP90AB1
hsa-miR-194-3p	HSP90AB1
hsa-miR-365b-5p	HSP90AB1
hsa-miR-378a-3p	HSP90AB1
hsa-miR-342-5p	HSP90AB1
hsa-miR-425-3p	HSP90AB1
hsa-miR-181d-5p	HSP90AB1
hsa-miR-181d-5p	HSP90AB1
hsa-miR-501-3p	HSP90AB1
hsa-miR-503-5p	HSP90AB1
hsa-miR-615-5p	HSP90AB1
hsa-miR-33b-3p	HSP90AB1
hsa-miR-541-3p	HSP90AB1
hsa-miR-708-3p	HSP90AB1
hsa-miR-1304-5p	HSP90AB1
hsa-let-7b-5p	MOBP
hsa-miR-15a-3p	MOBP
hsa-miR-17-3p	MOBP
hsa-miR-18a-3p	MOBP
hsa-miR-18a-3p	MOBP
hsa-miR-18a-3p	MOBP
hsa-miR-19b-1-5p	MOBP
hsa-miR-21-3p	MOBP
hsa-miR-21-3p	MOBP
hsa-miR-22-5p	MOBP
hsa-miR-22-5p	MOBP
hsa-miR-23a-3p	MOBP
hsa-miR-24-3p	MOBP
hsa-miR-25-5p	MOBP
hsa-miR-25-5p	MOBP
hsa-miR-26b-3p	MOBP
hsa-miR-26b-3p	MOBP
hsa-miR-29a-3p	MOBP
hsa-miR-30a-3p	MOBP
hsa-miR-31-5p	MOBP
hsa-miR-33a-5p	MOBP
hsa-miR-33a-5p	MOBP
hsa-miR-92a-3p	MOBP
hsa-miR-93-3p	MOBP
hsa-miR-96-5p	MOBP
hsa-miR-99a-3p	MOBP
hsa-miR-99a-3p	MOBP
hsa-miR-99a-3p	MOBP
hsa-miR-29b-2-5p	MOBP
hsa-miR-103a-2-5p	MOBP
hsa-miR-103a-3p	MOBP
hsa-miR-107	MOBP
hsa-miR-107	MOBP
hsa-miR-192-5p	MOBP
hsa-miR-192-3p	MOBP
hsa-miR-197-3p	MOBP
hsa-miR-199a-5p	MOBP
hsa-miR-199a-5p	MOBP
hsa-miR-199a-3p	MOBP
hsa-miR-129-5p	MOBP
hsa-miR-148a-5p	MOBP
hsa-miR-30c-5p	MOBP
hsa-miR-30c-2-3p	MOBP
hsa-miR-30d-3p	MOBP
hsa-miR-7-5p	MOBP
hsa-miR-7-5p	MOBP
hsa-miR-34a-5p	MOBP
hsa-miR-181c-3p	MOBP
hsa-miR-182-3p	MOBP
hsa-miR-199b-3p	MOBP
hsa-miR-205-5p	MOBP
hsa-miR-205-5p	MOBP
hsa-miR-205-5p	MOBP
hsa-miR-212-3p	MOBP
hsa-miR-214-5p	MOBP
hsa-miR-216a-5p	MOBP
hsa-miR-218-5p	MOBP
hsa-miR-218-1-3p	MOBP
hsa-miR-219a-1-3p	MOBP
hsa-miR-219a-1-3p	MOBP
hsa-miR-219a-1-3p	MOBP
hsa-miR-221-3p	MOBP
hsa-miR-221-3p	MOBP
hsa-miR-221-3p	MOBP
hsa-miR-222-3p	MOBP
hsa-miR-222-3p	MOBP
hsa-miR-222-3p	MOBP
hsa-miR-200b-5p	MOBP
hsa-let-7g-3p	MOBP
hsa-miR-27b-5p	MOBP
hsa-miR-30b-5p	MOBP
hsa-miR-30b-3p	MOBP
hsa-miR-30b-3p	MOBP
hsa-miR-125b-5p	MOBP
hsa-miR-125b-1-3p	MOBP
hsa-miR-125b-1-3p	MOBP
hsa-miR-128-3p	MOBP
hsa-miR-130a-5p	MOBP
hsa-miR-132-3p	MOBP
hsa-miR-133a-3p	MOBP
hsa-miR-135a-5p	MOBP
hsa-miR-138-5p	MOBP
hsa-miR-138-2-3p	MOBP
hsa-miR-145-5p	MOBP
hsa-miR-145-5p	MOBP
hsa-miR-125a-5p	MOBP
hsa-miR-125a-3p	MOBP
hsa-miR-127-3p	MOBP
[truncated: 18,579 more rows]
